# Supplementary material for: A Comprehensive Analysis of Gene Expression Changes Provoked by Bacterial and Fungal Infection in C. elegans
Source: PubMed Central journal article supplement (PMC3094335; doi:10.1371/journal.pone.0019055), 2011-05-13

Figure S2

A

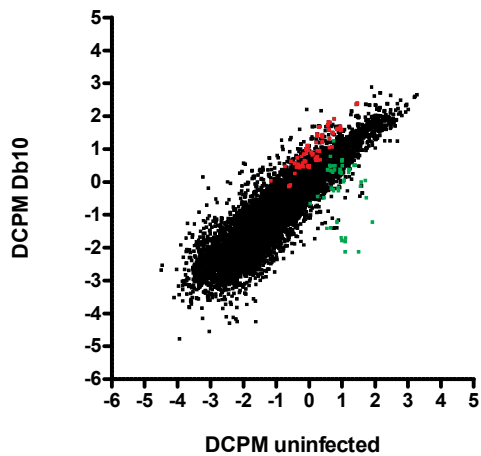

B

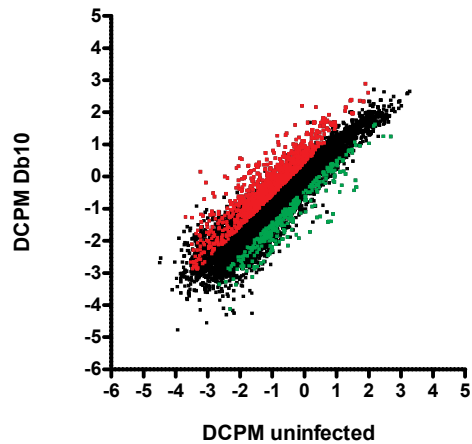

C

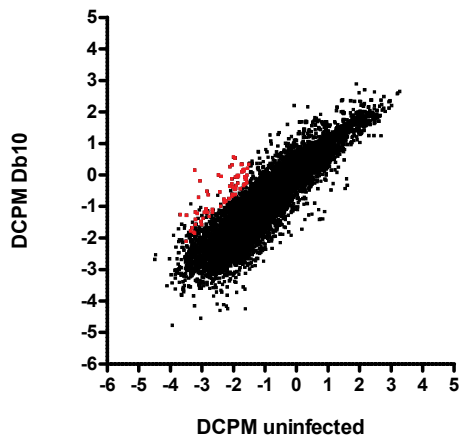

Supplement: pone.0019055.s002.pdf [file pone.0019055.s002.pdf]
