# Supplementary material for: A Comprehensive Analysis of Gene Expression Changes Provoked by Bacterial and Fungal Infection in C. elegans
Source: PubMed Central journal article supplement (PMC3094335; doi:10.1371/journal.pone.0019055), 2011-05-13
Supplement: pone.0019055.s018.pdf [file pone.0019055.s018.pdf]

Table S14

A

| Technique<br>(number of<br>genes<br>detected) | RNA-seq<br>(17 500) | Tiling array<br>(20 081) | Oligo array<br>(20 257) | cDNA array<br>(1527) |
|-----------------------------------------------|---------------------|--------------------------|-------------------------|----------------------|
| <b>RNA-seq</b>                                | <b>2276</b>         | 1008                     | 63                      | 56                   |
| <b>Tiling array</b>                           | 44%                 | <b>2661</b>              | 80                      | 55                   |
| <b>Oligo array</b>                            | 11%                 | 14%                      | <b>588</b>              | 6                    |
| <b>cDNA array</b>                             | 34%                 | 33%                      | 4%                      | <b>167</b>           |

B

| Technique           | RNA-seq     | Tiling array | Oligo array |
|---------------------|-------------|--------------|-------------|
| <b>RNA-seq</b>      | <b>3037</b> | 1371         | 160         |
| <b>Tiling array</b> | 45%         | <b>3813</b>  | 190         |
| <b>Oligo array</b>  | 25%         | 29%          | <b>646</b>  |

C

| Technique           | RNA-seq     | Tiling array | Oligo array |
|---------------------|-------------|--------------|-------------|
| <b>RNA-seq</b>      | <b>3123</b> | 1030         | 141         |
| <b>Tiling array</b> | 33%         | <b>4088</b>  | 174         |
| <b>Oligo array</b>  | 22%         | 28%          | <b>633</b>  |

D

| Technique          | RNA-seq     | Oligo array | cDNA array |
|--------------------|-------------|-------------|------------|
| <b>RNA-seq</b>     | <b>1533</b> | 33          | 16         |
| <b>Oligo array</b> | 8%          | <b>402</b>  | 18         |
| <b>cDNA array</b>  | 6%          | 7%          | <b>265</b> |
