# Supplementary material for: A Comprehensive Analysis of Gene Expression Changes Provoked by Bacterial and Fungal Infection in C. elegans
Source: PLOS journal article supplement (doi:10.1371/journal.pone.0019055), 2011-05-13

Figure S3

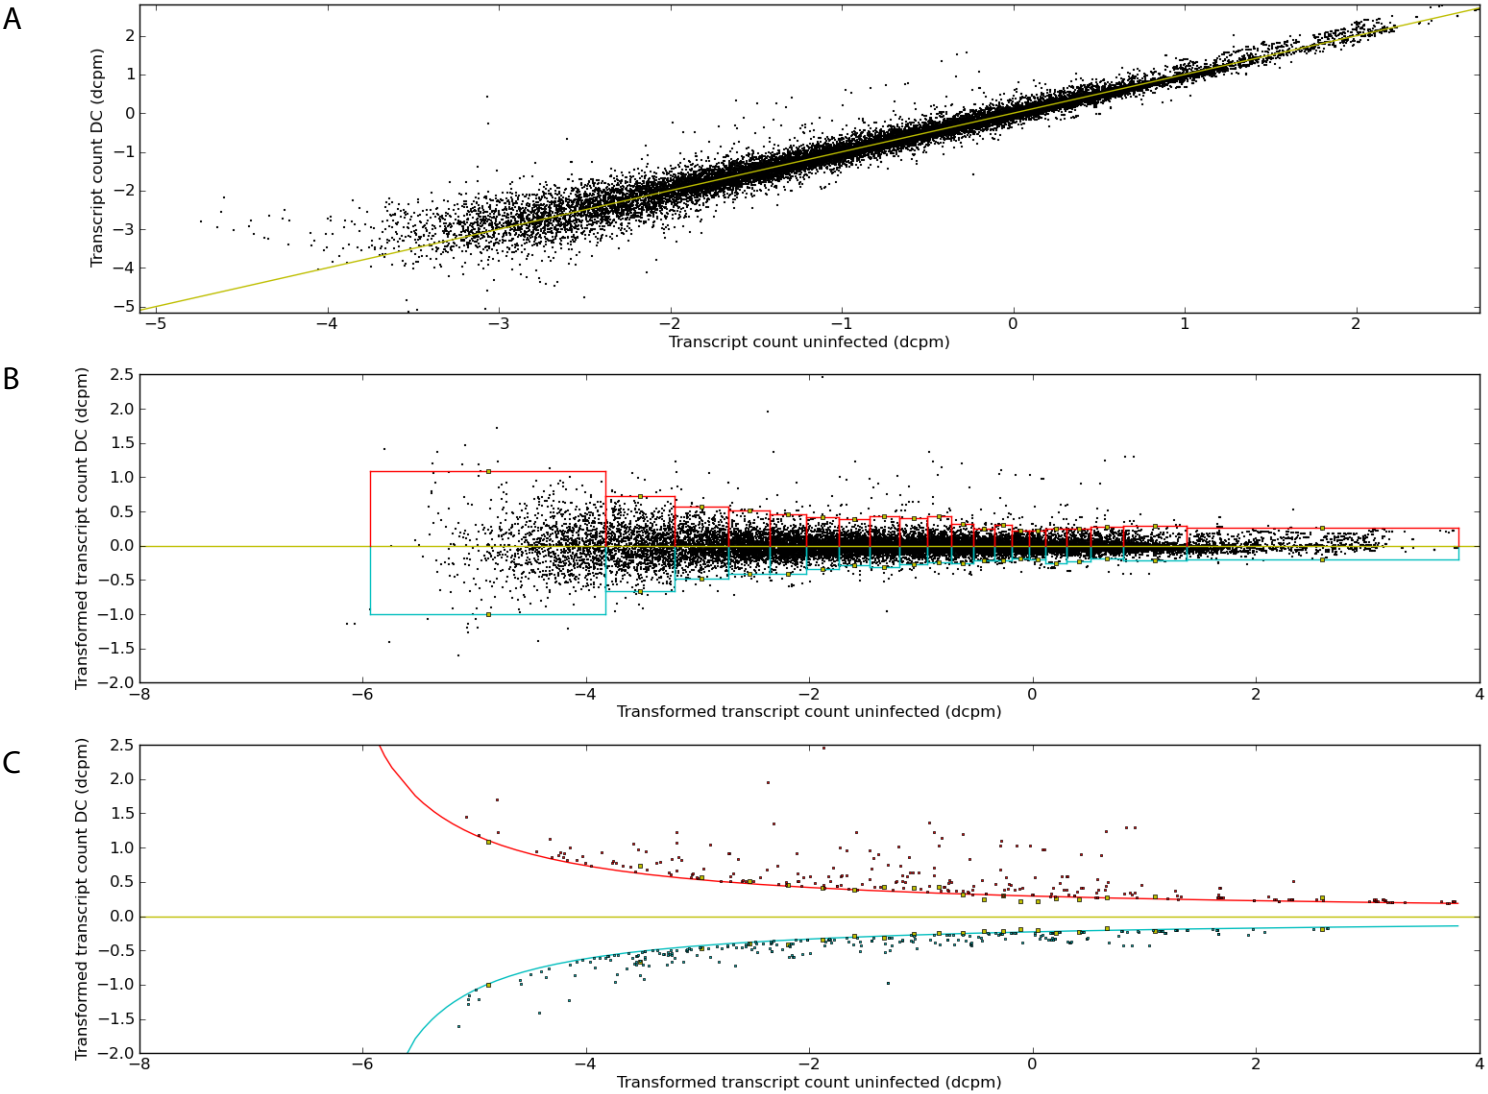

Supplement: S3 (10.1371/journal.pone.0019055.s003) [file journal.pone.0019055.s003]
