# Supplementary material for: A Comprehensive Analysis of Gene Expression Changes Provoked by Bacterial and Fungal Infection in C. elegans
Source: PLoS One. 2011 May 13;6(5):e19055. doi: 10.1371/journal.pone.0019055 (PMC3094335; doi:10.1371/journal.pone.0019055)
Supplement: Table S3 — Expression of transcripts after infection with E. faecalis for 24 hours using tiling arrays. Public gene, sequence and transcript names come from WS170. The values in the columns EF and OP50 are the log2 transformed ratios of the perfect-match to mismatch probe intensities, mapped on to individual transcripts (see Methods) for samples from worms infected for 24 h with E. faecalis strain OG1RF, or age-matched uninfected control worms. Transcripts identified as up- or down-regulated by infection (see Methods) are indicated. (XLS) [file pone.0019055.s007.xls]

## Sheet: Tiling_array_E.faecalis
GenePublicName	SequenceNameGene	SequenceNameTranscript	EF	OP50	Ratio_EFvsOP50	log2_Ratio_EFvsOP50	Infection_upregulated	Infection_downregulated
2L52.1	2L52.1	2L52.1	5.94	4.99	1.92	0.94
2RSSE.1	2RSSE.1	2RSSE.1	8.73	7.68	2.07	1.05
2RSSE.2	2RSSE.2	2RSSE.2	7.7	6.37	2.51	1.33
3R5.1	3R5.1	3R5.1	6.82	5.93	1.85	0.89
nas-6	4R79.1	4R79.1a	3.54	2.47	2.09	1.06
nas-6	4R79.1	4R79.1b	3.78	2.62	2.23	1.16
4R79.2	4R79.2	4R79.2	3.83	2.42	2.65	1.41
6R55.1	6R55.1	6R55.1a	8.15	7.63	1.44	0.53
6R55.1	6R55.1	6R55.1b	8.05	7.55	1.42	0.5
6R55.2	6R55.2	6R55.2	3.23	1.9	2.52	1.34
sri-20	AC3.1	AC3.1	3.87	1.8	4.2	2.07	1
spe-10	AC3.10	AC3.10	2.76	1.99	1.71	0.77
ugt-49	AC3.2	AC3.2	7.89	6.01	3.68	1.88	1
abu-1	AC3.3	AC3.3	3.89	1.87	4.07	2.02	1
pqn-2	AC3.4	AC3.4	3.37	2.11	2.4	1.26
AC3.5	AC3.5	AC3.5.1	7.13	5.62	2.84	1.5
AC3.5	AC3.5	AC3.5.2	7.1	5.62	2.8	1.49
col-151	AC3.6	AC3.6	2.79	2.07	1.64	0.71
ugt-1	AC3.7	AC3.7	5.5	3.86	3.11	1.64
ugt-2	AC3.8	AC3.8	6.73	3.82	7.54	2.91	1
tag-49	AC7.1	AC7.1a	3.32	2.26	2.08	1.06
tag-49	AC7.1	AC7.1b	3.21	2.25	1.94	0.96
soc-2	AC7.2	AC7.2a.1	8.06	6.48	2.99	1.58
soc-2	AC7.2	AC7.2a.2	8.12	6.5	3.07	1.62
soc-2	AC7.2	AC7.2b	7.45	6.01	2.71	1.44
AC7.3	AC7.3	AC7.3	3.33	2.35	1.96	0.97
AC8.10	AC8.10	AC8.10	6.91	4.85	4.18	2.06	1
AC8.11	AC8.11	AC8.11	7.18	5.43	3.35	1.74	1
AC8.12	AC8.12	AC8.12	6.56	4.93	3.11	1.63
AC8.3	AC8.3	AC8.3	6.45	4.43	4.05	2.02	1
AC8.4	AC8.4	AC8.4	7.41	5.54	3.67	1.88	1
AC8.7	AC8.7	AC8.7	6.56	5.29	2.42	1.28
AH10.1	AH10.1	AH10.1	4.64	1.78	7.29	2.87	1
AH10.2	AH10.2	AH10.2	4.58	2.91	3.17	1.67
AH10.3	AH10.3	AH10.3	4.48	2.53	3.86	1.95	1
AH10.4	AH10.4	AH10.4	3.16	2.58	1.49	0.57
gcy-1	AH6.1	AH6.1	3.17	1.91	2.4	1.26
sra-6	AH6.10	AH6.10	3.49	2.34	2.21	1.15
sra-7	AH6.11	AH6.11	2.38	2	1.31	0.38
sra-8	AH6.12	AH6.12	3.39	2.21	2.26	1.18
sra-9	AH6.14	AH6.14	1.34	1.42	0.95	-0.08
AH6.2	AH6.2	AH6.2	4.06	2.4	3.15	1.66
AH6.3	AH6.3	AH6.3	2.25	1.3	1.92	0.94
sra-1	AH6.4	AH6.4	2.46	2.21	1.18	0.24
mex-6	AH6.5	AH6.5	10.63	10.27	1.28	0.36
sra-2	AH6.6	AH6.6	3.53	1.8	3.33	1.74	1
sra-3	AH6.7	AH6.7	2.35	1.54	1.76	0.81
sra-4	AH6.8	AH6.8	1.27	1.42	0.9	-0.15
AH9.1	AH9.1	AH9.1	4.58	3.05	2.88	1.52
crn-4	AH9.2	AH9.2	5.81	5.48	1.26	0.33
AH9.3	AH9.3	AH9.3	6.28	5.9	1.3	0.38
AH9.4	AH9.4	AH9.4	3.41	2.01	2.65	1.41
AH9.6	AH9.6	AH9.6	5.44	2.62	7.07	2.82	1
B0001.1	B0001.1	B0001.1	9.49	8.32	2.25	1.17
B0001.2	B0001.2	B0001.2	7.98	6.83	2.21	1.14
B0001.3	B0001.3	B0001.3	7.3	6.5	1.74	0.8
B0001.4	B0001.4	B0001.4	8.17	7.07	2.14	1.1
B0001.5	B0001.5	B0001.5	7.1	5.89	2.31	1.21
B0001.6	B0001.6	B0001.6.1	8.82	7.38	2.72	1.44
B0001.6	B0001.6	B0001.6.2	9.03	7.77	2.4	1.26
B0001.6	B0001.6	B0001.6.3	9.26	7.96	2.46	1.3
B0001.7	B0001.7	B0001.7	7.48	6.95	1.44	0.52
B0001.8	B0001.8	B0001.8.1	6.96	6.38	1.5	0.59
B0001.8	B0001.8	B0001.8.2	7.1	6.66	1.35	0.44
B0001.8	B0001.8	B0001.8.3	7.1	6.66	1.35	0.44
amx-2	B0019.1	B0019.1	6.39	4.18	4.64	2.21	1
B0019.2	B0019.2	B0019.2	6.46	5.74	1.64	0.71
col-149	B0024.1	B0024.1	6.06	4.14	3.8	1.92	1
B0024.10	B0024.10	B0024.10.1	8.65	7.97	1.6	0.68
B0024.10	B0024.10	B0024.10.2	8.76	8.16	1.52	0.6
B0024.11	B0024.11	B0024.11	8.06	7.53	1.45	0.54
gna-1	B0024.12	B0024.12	6.46	5.33	2.2	1.14
B0024.13	B0024.13	B0024.13a	9.13	8.37	1.69	0.76
B0024.13	B0024.13	B0024.13b	7.78	7.14	1.55	0.63
crm-1	B0024.14	B0024.14a	7.87	6.56	2.47	1.31
crm-1	B0024.14	B0024.14b	8.01	6.71	2.46	1.3
crm-1	B0024.14	B0024.14c.1	7.89	6.56	2.52	1.33
crm-1	B0024.14	B0024.14c.2	7.75	6.31	2.72	1.44
crm-1	B0024.14	B0024.14d	7.9	6.58	2.5	1.32
crm-1	B0024.14	B0024.14e	7.78	6.48	2.46	1.3
B0024.15	B0024.15	B0024.15	2.83	1.63	2.3	1.2
col-150	B0024.2	B0024.2	3.54	2.62	1.89	0.92
B0024.3	B0024.3	B0024.3	4.39	3.21	2.26	1.18
B0024.4	B0024.4	B0024.4	6.78	5.13	3.13	1.65
gcy-6	B0024.6	B0024.6	2.45	1.85	1.52	0.6
B0024.8	B0024.8	B0024.8	3.11	2.48	1.55	0.64
trx-2	B0024.9	B0024.9.1	9.11	8.31	1.74	0.8
trx-2	B0024.9	B0024.9.2	9.4	8.54	1.82	0.86
vps-34	B0025.1	B0025.1a	8.29	7.18	2.16	1.11
vps-34	B0025.1	B0025.1b.1	8.2	7.18	2.02	1.02
vps-34	B0025.1	B0025.1b.2	8.29	7.18	2.16	1.11
vps-34	B0025.1	B0025.1c.1	8.29	7.18	2.16	1.11
vps-34	B0025.1	B0025.1c.2	8.41	7.38	2.04	1.03
vps-34	B0025.1	B0025.1d.1	8.24	7.17	2.1	1.07
vps-34	B0025.1	B0025.1d.2	8.32	7.27	2.06	1.04
vps-34	B0025.1	B0025.1e	8.24	7.17	2.1	1.07
csn-2	B0025.2	B0025.2.1	8.97	8.08	1.86	0.89
csn-2	B0025.2	B0025.2.2	9.09	8.43	1.58	0.66
csn-2	B0025.2	B0025.2.3	9.09	8.43	1.58	0.66
csn-2	B0025.2	B0025.2.4	9.09	8.43	1.58	0.66
B0025.4	B0025.4	B0025.4	4.27	3.5	1.71	0.77
B0034.1	B0034.1	B0034.1	4.63	3.33	2.46	1.3
B0034.2	B0034.2	B0034.2	2.96	1.65	2.48	1.31
casy-1	B0034.3	B0034.3a	8.58	6.43	4.43	2.15	1
casy-1	B0034.3	B0034.3b	7.51	4.65	7.26	2.86	1
casy-1	B0034.3	B0034.3c.1	8.5	6.4	4.31	2.11	1
casy-1	B0034.3	B0034.3c.2	7.3	4.69	6.1	2.61	1
B0034.4	B0034.4	B0034.4	3.37	2.07	2.46	1.3
B0034.5	B0034.5	B0034.5	2.8	1.74	2.09	1.06
B0034.7	B0034.7	B0034.7	4.15	1.63	5.71	2.51	1
his-45	B0035.10	B0035.10	13.55	13.18	1.29	0.37
B0035.11	B0035.11	B0035.11	8.06	7.18	1.84	0.88
B0035.12	B0035.12	B0035.12.1	8.28	7.25	2.04	1.03
B0035.12	B0035.12	B0035.12.2	8.7	7.64	2.08	1.06
B0035.13	B0035.13	B0035.13	7.11	6.05	2.09	1.06
dnj-1	B0035.14	B0035.14.1	8.31	7.38	1.9	0.93
dnj-1	B0035.14	B0035.14.2	8.52	7.74	1.71	0.77
B0035.15	B0035.15	B0035.15	7.38	6.34	2.05	1.04
B0035.16	B0035.16	B0035.16	4.56	3.66	1.86	0.9
B0035.18	B0035.18	B0035.18	8.56	8.11	1.36	0.45
B0035.1	B0035.1	B0035.1a	8.95	7.99	1.94	0.96
B0035.1	B0035.1	B0035.1b	8.85	8	1.8	0.85
dnj-2	B0035.2	B0035.2	7.51	6.97	1.46	0.54
B0035.3	B0035.3	B0035.3	8.14	7.46	1.6	0.68
pfd-4	B0035.4	B0035.4.1	8.9	8.01	1.85	0.89
pfd-4	B0035.4	B0035.4.2	7.05	6.63	1.34	0.42
pfd-4	B0035.4	B0035.4.3	8.9	8.01	1.85	0.89
B0035.5	B0035.5	B0035.5.1	8.75	7.64	2.15	1.1
B0035.5	B0035.5	B0035.5.2	8.82	7.78	2.06	1.05
B0035.6	B0035.6	B0035.6	8.23	7.84	1.31	0.39
his-47	B0035.7	B0035.7	12.54	11.82	1.65	0.72
his-48	B0035.8	B0035.8	13.34	13.24	1.07	0.1
his-46	B0035.9	B0035.9	13.79	13.21	1.5	0.58
B0041.1	B0041.1	B0041.1	2.04	2.14	0.93	-0.11
B0041.2	B0041.2	B0041.2a.1	9.48	8.52	1.94	0.96
B0041.2	B0041.2	B0041.2a.2	9.48	8.52	1.94	0.96
B0041.2	B0041.2	B0041.2b	9.37	8.49	1.84	0.88
B0041.2	B0041.2	B0041.2c	9.5	8.57	1.9	0.93
B0041.3	B0041.3	B0041.3	7.24	6.41	1.78	0.83
rpl-4	B0041.4	B0041.4.1	11.54	10.73	1.76	0.82
rpl-4	B0041.4	B0041.4.2	12.71	11.88	1.78	0.83
rpl-4	B0041.4	B0041.4.3	13.01	12.16	1.8	0.85
B0041.5	B0041.5	B0041.5	6.04	5.2	1.79	0.84
ptps-1	B0041.6	B0041.6a	7.03	5.78	2.38	1.25
ptps-1	B0041.6	B0041.6b	7.03	5.78	2.38	1.25
xnp-1	B0041.7	B0041.7	8	6.94	2.09	1.06
B0041.8	B0041.8	B0041.8.1	9.11	9.26	0.9	-0.15
B0041.8	B0041.8	B0041.8.2	9.89	9.92	0.99	-0.02
bath-20	B0047.1	B0047.1a	4.76	3.06	3.26	1.71	1
bath-20	B0047.1	B0047.1b	4.97	3.24	3.32	1.73	1
B0047.2	B0047.2	B0047.2	3.55	2.92	1.55	0.63
bath-24	B0047.3	B0047.3	4.73	3.48	2.38	1.25
math-1	B0047.4	B0047.4	4.39	2.84	2.92	1.55
tsp-20	B0198.1	B0198.1	3.35	3.36	1	0
B0198.2	B0198.2	B0198.2	3.27	3.41	0.91	-0.14
B0198.3	B0198.3	B0198.3	5.05	3.42	3.1	1.63
B0205.10	B0205.10	B0205.10.1	4.56	2.72	3.59	1.85	1
B0205.10	B0205.10	B0205.10.2	4.51	2.74	3.42	1.77	1
B0205.11	B0205.11	B0205.11	8.25	7.19	2.08	1.06
B0205.12	B0205.12	B0205.12	7.03	6.26	1.71	0.78
B0205.13	B0205.13	B0205.13	3.93	2.6	2.52	1.34
B0205.14	B0205.14	B0205.14	4.58	1.43	8.87	3.15	1
B0205.1	B0205.1	B0205.1a	6.99	5.77	2.33	1.22
B0205.1	B0205.1	B0205.1b	6.37	5.31	2.09	1.06
srz-85	B0205.2	B0205.2a	2.63	2.51	1.09	0.12
srz-85	B0205.2	B0205.2b	2.7	2.31	1.31	0.39
rpn-10	B0205.3	B0205.3.1	9.4	8.68	1.65	0.72
rpn-10	B0205.3	B0205.3.2	9.79	9.12	1.59	0.67
B0205.4	B0205.4	B0205.4	2.71	2.01	1.62	0.7
B0205.5	B0205.5	B0205.5	4.42	4.33	1.07	0.09
B0205.6	B0205.6	B0205.6	6.81	5.65	2.23	1.16
kin-3	B0205.7	B0205.7.1	9.25	8.78	1.39	0.47
kin-3	B0205.7	B0205.7.2	9.22	8.77	1.37	0.45
B0205.8	B0205.8	B0205.8	6.76	4.94	3.52	1.82	1
B0205.9	B0205.9	B0205.9	8.22	7.62	1.51	0.59
B0207.1	B0207.1	B0207.1	3.77	2.11	3.15	1.66
B0207.10	B0207.10	B0207.10	2.66	3.34	0.63	-0.68
B0207.11	B0207.11	B0207.11	4.19	1.75	5.41	2.44	1
41730	B0207.12	B0207.12a	4.36	3.06	2.45	1.3
41730	B0207.12	B0207.12b	4.21	3.04	2.25	1.17
41730	B0207.12	B0207.12c	4.93	3.09	3.59	1.85	1
B0207.2	B0207.2	B0207.2	3.7	2.67	2.04	1.03
gpa-14	B0207.3	B0207.3a	4.21	2.17	4.11	2.04	1
gpa-14	B0207.3	B0207.3b	3.97	2.13	3.59	1.84	1
air-2	B0207.4	B0207.4	8.06	7.8	1.2	0.27
B0207.5	B0207.5	B0207.5	2.83	1.85	1.98	0.99
B0207.6	B0207.6	B0207.6	8.33	7.32	2.02	1.01
B0207.7	B0207.7	B0207.7	3.96	2.39	2.97	1.57
B0207.8	B0207.8	B0207.8	2.59	1.93	1.58	0.66
B0207.9	B0207.9	B0207.9	3.33	1.79	2.91	1.54
B0212.1	B0212.1	B0212.1	3.23	2.54	1.61	0.68
sre-5	B0212.2	B0212.2	4.36	3.19	2.25	1.17
B0212.3	B0212.3	B0212.3	5.16	5.41	0.84	-0.26
B0212.4	B0212.4	B0212.4a	5.4	3.96	2.71	1.44
B0212.4	B0212.4	B0212.4b	5.03	3.78	2.38	1.25
B0212.4	B0212.4	B0212.4c	5.4	3.86	2.93	1.55
osm-9	B0212.5	B0212.5	4.76	3.13	3.1	1.63
B0212.6	B0212.6	B0212.6	3.35	2.57	1.71	0.78
cyp-34A5	B0213.10	B0213.10	3.73	3.17	1.47	0.55
cyp-34A6	B0213.11	B0213.11	2.52	2.24	1.21	0.27
cyp-34A7	B0213.12	B0213.12	3.06	2.07	1.98	0.99
cyp-34A8	B0213.14	B0213.14	6.72	5.34	2.6	1.38
cyp-34A9	B0213.15	B0213.15a	7.58	6.12	2.77	1.47
cyp-34A9	B0213.15	B0213.15b	7.64	6.29	2.56	1.35
cyp-34A9	B0213.15	B0213.15c	7.82	6.38	2.73	1.45
cyp-34A10	B0213.16	B0213.16	4.86	2.9	3.89	1.96	1
nlp-34	B0213.17	B0213.17.1	4.61	3.99	1.54	0.63
nlp-34	B0213.17	B0213.17.2	5.41	4.15	2.39	1.26
nlp-27	B0213.2	B0213.2	9.08	9.12	0.97	-0.04
nlp-28	B0213.3	B0213.3	8.38	7.78	1.51	0.6
nlp-29	B0213.4	B0213.4	8.6	8.74	0.9	-0.15
nlp-30	B0213.5	B0213.5	5.33	4.46	1.83	0.87
nlp-31	B0213.6	B0213.6	6.77	4.87	3.72	1.9	1
str-83	B0213.7	B0213.7	4.13	2.38	3.37	1.75	1
str-82	B0213.8	B0213.8	3.23	2.54	1.61	0.69
str-247	B0213.9	B0213.9	4.13	1.99	4.41	2.14	1
B0218.1	B0218.1	B0218.1a.1	6.94	5.5	2.72	1.45
B0218.1	B0218.1	B0218.1a.2	8.55	6.27	4.87	2.29	1
B0218.1	B0218.1	B0218.1a.3	8.55	6.26	4.89	2.29	1
B0218.1	B0218.1	B0218.1a.4	8.55	6.26	4.89	2.29	1
B0218.1	B0218.1	B0218.1a.5	8.55	6.26	4.89	2.29	1
B0218.1	B0218.1	B0218.1b.1	8.58	6.34	4.71	2.24	1
B0218.1	B0218.1	B0218.1b.2	8.57	6.33	4.73	2.24	1
B0218.1	B0218.1	B0218.1b.3	8.57	6.33	4.73	2.24	1
B0218.2	B0218.2	B0218.2.1	7.74	6.75	1.98	0.98
B0218.2	B0218.2	B0218.2.2	7.98	7.05	1.9	0.93
pmk-1	B0218.3	B0218.3	7.34	6.18	2.23	1.15
B0218.5	B0218.5	B0218.5	2.61	2.77	0.89	-0.16
clec-51	B0218.6	B0218.6	5.19	4.37	1.76	0.81
B0218.7	B0218.7	B0218.7	2.51	1.9	1.53	0.61
clec-52	B0218.8	B0218.8	7.4	6.39	2.01	1.01
B0222.1	B0222.1	B0222.1	3.24	2.89	1.27	0.34
B0222.10	B0222.10	B0222.10	3.49	1.85	3.12	1.64
B0222.11	B0222.11	B0222.11	3.47	2.24	2.35	1.23
B0222.2	B0222.2	B0222.2	3.61	1.86	3.37	1.75	1
B0222.3	B0222.3	B0222.3	7.22	5.35	3.65	1.87	1
tag-38	B0222.4	B0222.4	4.46	3.08	2.59	1.38
B0222.5	B0222.5	B0222.5	6.3	4.11	4.55	2.19	1
col-144	B0222.6	B0222.6	10.45	9.07	2.6	1.38
col-145	B0222.7	B0222.7	6.38	5.79	1.51	0.59
col-10	B0222.8	B0222.8	10.61	8.65	3.9	1.96	1
B0222.9	B0222.9	B0222.9	6.43	5.02	2.65	1.41
B0228.1	B0228.1	B0228.1	4.29	4.08	1.15	0.21
tag-308	B0228.4	B0228.4a	7.37	5.58	3.45	1.79	1
tag-308	B0228.4	B0228.4b	6.99	5.4	3.02	1.59
tag-308	B0228.4	B0228.4c	7.16	5.41	3.36	1.75	1
tag-308	B0228.4	B0228.4d	6.68	5.32	2.57	1.36
tag-308	B0228.4	B0228.4e	7.38	5.4	3.94	1.98	1
trx-1	B0228.5	B0228.5a	3.71	3.26	1.37	0.45
trx-1	B0228.5	B0228.5b	3.06	2.71	1.27	0.34
B0228.6	B0228.6	B0228.6	6.22	5.13	2.12	1.08
B0228.7	B0228.7	B0228.7.1	8.88	7.52	2.58	1.37
B0228.7	B0228.7	B0228.7.2	8.99	7.61	2.61	1.38
B0228.8	B0228.8	B0228.8	2.77	1.92	1.81	0.85
B0228.9	B0228.9	B0228.9	3.6	1.6	4.01	2	1
B0238.1	B0238.1	B0238.1	6.01	4.57	2.71	1.44
B0238.10	B0238.10	B0238.10	9.85	8.91	1.92	0.94
B0238.11	B0238.11	B0238.11.1	9.59	9.53	1.05	0.06
B0238.11	B0238.11	B0238.11.2	10.5	10.38	1.09	0.12
B0238.12	B0238.12	B0238.12	4.42	3.54	1.84	0.88
B0238.13	B0238.13	B0238.13	4.26	2.41	3.61	1.85	1
B0238.15	B0238.15	B0238.15	2.35	4.94	0.17	-2.59		1
srt-68	B0238.3	B0238.3	2.73	2.45	1.21	0.28
srt-67	B0238.5	B0238.5	1.98	1.57	1.32	0.4
srt-70	B0238.6	B0238.6	1.55	1.82	0.83	-0.27
B0238.7	B0238.7	B0238.7	3.59	1.7	3.71	1.89	1
srt-69	B0238.8	B0238.8	3.8	1.76	4.12	2.04	1
B0238.9	B0238.9	B0238.9	8.18	7.29	1.86	0.89
rhr-2	B0240.1	B0240.1.1	4.41	2.84	2.96	1.57
rhr-2	B0240.1	B0240.1.2	4.3	2.85	2.72	1.45
spe-42	B0240.2	B0240.2	3.31	1.68	3.1	1.63
daf-11	B0240.3	B0240.3	3.51	2.32	2.29	1.19
npp-22	B0240.4	B0240.4.1	8.48	7.63	1.8	0.85
npp-22	B0240.4	B0240.4.2	8.59	7.7	1.85	0.89
B0244.10	B0244.10	B0244.10	5.03	2.87	4.47	2.16	1
B0244.11	B0244.11	B0244.11	4.56	1.23	10.1	3.34	1
ida-1	B0244.2	B0244.2.1	8.78	7.02	3.39	1.76	1
ida-1	B0244.2	B0244.2.2	8.78	7.02	3.39	1.76	1
B0244.4	B0244.4	B0244.4	2.63	1.76	1.83	0.87
B0244.5	B0244.5	B0244.5	4.24	2.76	2.78	1.48
B0244.6	B0244.6	B0244.6	4.32	2.46	3.62	1.85	1
B0244.7	B0244.7	B0244.7	4.59	1.81	6.89	2.78	1
egg-1	B0244.8	B0244.8	7.69	7.44	1.19	0.25
B0244.9	B0244.9	B0244.9	5.63	5.6	1.02	0.03
rpl-2	B0250.1	B0250.1.1	13.41	13.03	1.3	0.38
rpl-2	B0250.1	B0250.1.2	13.78	13.32	1.37	0.46
srbc-78	B0250.10	B0250.10	1.82	2.27	0.73	-0.45
B0250.2	B0250.2	B0250.2	3.23	3.2	1.02	0.03
B0250.4	B0250.4	B0250.4	4.72	3.33	2.63	1.4
B0250.5	B0250.5	B0250.5	8.73	8.53	1.15	0.2
srbc-79	B0250.6	B0250.6	2.34	1.05	2.44	1.29
B0250.8	B0250.8	B0250.8	3.63	4	0.77	-0.37
B0250.9	B0250.9	B0250.9	6.37	5.07	2.47	1.31
B0252.1	B0252.1	B0252.1	5.24	4.33	1.88	0.91
asm-1	B0252.2	B0252.2	5.03	4.06	1.96	0.97
B0252.3	B0252.3	B0252.3a	5.15	4.54	1.53	0.61
B0252.3	B0252.3	B0252.3b	5.62	4.68	1.92	0.94
B0252.3	B0252.3	B0252.3c.1	5.15	4.54	1.53	0.61
B0252.3	B0252.3	B0252.3c.2	5.15	4.54	1.53	0.61
cyn-10	B0252.4	B0252.4a	8.78	7.98	1.73	0.79
cyn-10	B0252.4	B0252.4b	6.96	6.15	1.76	0.81
B0252.5	B0252.5	B0252.5	2.35	3.17	0.57	-0.81		1
B0252.8	B0252.8	B0252.8	3.73	2.91	1.78	0.83
B0261.1	B0261.1	B0261.1.1	8.24	7.16	2.11	1.08
B0261.1	B0261.1	B0261.1.2	8.57	7.48	2.13	1.09
let-363	B0261.2	B0261.2a	8.82	7.92	1.86	0.9
let-363	B0261.2	B0261.2b	8.8	7.88	1.88	0.91
B0261.4	B0261.4	B0261.4a	9.09	8.1	2	1
B0261.4	B0261.4	B0261.4b	9.32	8.34	1.97	0.98
B0261.5	B0261.5	B0261.5	2.68	2.83	0.9	-0.15
B0261.6	B0261.6	B0261.6a	4.49	2.6	3.72	1.89	1
B0261.6	B0261.6	B0261.6b	4.49	2.6	3.72	1.89	1
B0261.7	B0261.7	B0261.7	9.45	8.36	2.12	1.08
B0261.8	B0261.8	B0261.8	7.08	5.73	2.55	1.35
tbb-4	B0272.1	B0272.1	5.97	3.87	4.3	2.1	1
B0272.2	B0272.2	B0272.2	5.5	5.34	1.12	0.16
B0272.3	B0272.3	B0272.3	9.31	9.06	1.2	0.26
B0272.4	B0272.4	B0272.4	5.55	5.84	0.82	-0.29
B0273.1	B0273.1	B0273.1	3.01	2.32	1.61	0.69
puf-7	B0273.2	B0273.2.1	10.89	10.53	1.29	0.36
puf-7	B0273.2	B0273.2.2	11.09	10.81	1.22	0.28
B0273.3	B0273.3	B0273.3	7.26	6.62	1.56	0.64
unc-5	B0273.4	B0273.4a	6.57	5.42	2.21	1.15
unc-5	B0273.4	B0273.4b	6.53	5.49	2.06	1.05
B0280.10	B0280.10	B0280.10	5.99	5.41	1.5	0.58
B0280.11	B0280.11	B0280.11	2.23	1.38	1.8	0.85
glr-2	B0280.12	B0280.12a	3.25	2.58	1.59	0.67
glr-2	B0280.12	B0280.12b	3.25	2.63	1.54	0.63
B0280.13	B0280.13	B0280.13	6.5	4.46	4.1	2.04	1
B0280.17	B0280.17	B0280.17	4.77	3.41	2.57	1.36
B0280.1	B0280.1	B0280.1a	7.83	7.88	0.97	-0.05
B0280.1	B0280.1	B0280.1b	6.81	6.48	1.25	0.33
B0280.2	B0280.2	B0280.2	5.39	3.89	2.83	1.5
B0280.3	B0280.3	B0280.3.1	9.43	7.94	2.8	1.49
B0280.3	B0280.3	B0280.3.2	9.51	8.13	2.6	1.38
B0280.3	B0280.3	B0280.3.3	9.5	8.07	2.69	1.43
odd-1	B0280.4	B0280.4	5.39	3.06	5.05	2.34	1
cpg-2	B0280.5	B0280.5.1	12.22	11.65	1.49	0.57
cpg-2	B0280.5	B0280.5.2	12.22	11.65	1.49	0.57
B0280.7	B0280.7	B0280.7	2.21	2.51	0.81	-0.3
nhr-10	B0280.8	B0280.8	6.42	4.72	3.24	1.7
B0280.9	B0280.9	B0280.9	8.57	7.8	1.7	0.77
B0281.1	B0281.1	B0281.1	4.76	2.41	5.08	2.35	1
B0281.3	B0281.3	B0281.3	7.25	5.49	3.38	1.76	1
B0281.4	B0281.4	B0281.4	3.74	3.43	1.24	0.31
B0281.5	B0281.5	B0281.5	5.02	5.76	0.6	-0.74
B0281.6	B0281.6	B0281.6	2.52	1.41	2.16	1.11
B0281.8	B0281.8	B0281.8	3.12	2.23	1.86	0.89
B0284.1	B0284.1	B0284.1	5.81	3.63	4.55	2.19	1
B0284.2	B0284.2	B0284.2	3.25	3.07	1.13	0.18
B0284.3	B0284.3	B0284.3	4.99	4.21	1.72	0.78
B0284.4	B0284.4	B0284.4	4.48	1.48	7.99	3	1
B0285.1	B0285.1	B0285.1	8.83	8	1.79	0.84
ckb-3	B0285.10	B0285.10	2.76	1.53	2.34	1.23
B0285.3	B0285.3	B0285.3	6.47	6.27	1.15	0.2
B0285.4	B0285.4	B0285.4	7.77	7.88	0.93	-0.11
hse-5	B0285.5	B0285.5	7.63	6.73	1.86	0.89
B0285.6	B0285.6	B0285.6	3.89	1.28	6.09	2.61	1
B0285.7	B0285.7	B0285.7	7.54	5.46	4.23	2.08	1
ckb-1	B0285.8	B0285.8	5.24	3.95	2.45	1.29
ckb-2	B0285.9	B0285.9	5.03	4.31	1.65	0.72
B0286.1	B0286.1	B0286.1	5.77	4.94	1.78	0.83
lat-2	B0286.2	B0286.2a	4.12	2.35	3.41	1.77	1
lat-2	B0286.2	B0286.2b	4.47	2.84	3.09	1.63
B0286.3	B0286.3	B0286.3	7.81	6.52	2.45	1.29
ntl-2	B0286.4	B0286.4a.1	8.25	7.03	2.32	1.22
ntl-2	B0286.4	B0286.4a.2	8.56	7.32	2.35	1.23
ntl-2	B0286.4	B0286.4b	8.37	7.06	2.48	1.31
ntl-2	B0286.4	B0286.4c.1	9.01	7.91	2.14	1.1
ntl-2	B0286.4	B0286.4c.2	8.21	6.99	2.33	1.22
ntl-2	B0286.4	B0286.4c.3	8.56	7.32	2.35	1.23
ntl-2	B0286.4	B0286.4c.4	8.57	7.33	2.36	1.24
ntl-2	B0286.4	B0286.4c.5	8.57	7.34	2.35	1.23
ntl-2	B0286.4	B0286.4d.1	8.69	7.56	2.19	1.13
ntl-2	B0286.4	B0286.4d.2	8.21	6.99	2.34	1.23
ntl-2	B0286.4	B0286.4d.3	8.93	7.81	2.16	1.11
ntl-2	B0286.4	B0286.4d.4	8.29	6.97	2.51	1.33
ntl-2	B0286.4	B0286.4d.5	8.56	7.32	2.35	1.23
fkh-6	B0286.5	B0286.5	4.26	4.3	0.97	-0.04
B0286.6	B0286.6	B0286.6	4.1	3.29	1.75	0.8
B0294.1	B0294.1	B0294.1	3.93	2.73	2.29	1.2
B0294.3	B0294.3	B0294.3	2.77	2.93	0.89	-0.17
kin-25	B0302.1	B0302.1a	7.85	7.07	1.71	0.78
kin-25	B0302.1	B0302.1b	8.06	7.34	1.65	0.72
kin-25	B0302.1	B0302.1c	8.24	7.54	1.62	0.7
B0302.2	B0302.2	B0302.2	4.02	2.51	2.86	1.52
B0302.4	B0302.4	B0302.4	1.36	1.06	1.23	0.29
B0302.5	B0302.5	B0302.5	8.36	7.18	2.26	1.18
B0303.11	B0303.11	B0303.11	6.06	4.8	2.4	1.26
B0303.14	B0303.14	B0303.14	5.65	4.07	2.99	1.58
B0303.15	B0303.15	B0303.15	9.41	8.77	1.56	0.64
B0303.16	B0303.16	B0303.16	3.04	1.84	2.28	1.19
B0303.2	B0303.2	B0303.2	5.14	4.12	2.03	1.02
B0303.3	B0303.3	B0303.3.1	9.53	8.81	1.65	0.72
B0303.3	B0303.3	B0303.3.2	8.64	7.25	2.62	1.39
B0303.3	B0303.3	B0303.3.3	9.71	8.96	1.68	0.75
B0303.4	B0303.4	B0303.4.1	8.18	7.09	2.13	1.09
B0303.4	B0303.4	B0303.4.2	8.47	7.47	1.99	1
B0303.7	B0303.7	B0303.7	6.31	5.39	1.89	0.92
sdz-1	B0303.8	B0303.8	2.04	1.65	1.31	0.39
B0303.9	B0303.9	B0303.9	7.31	6.06	2.37	1.24
hlh-1	B0304.1	B0304.1a	5.17	4.28	1.86	0.89
hlh-1	B0304.1	B0304.1b	5.17	4.28	1.86	0.89
hlh-1	B0304.1	B0304.1c	5.21	4.3	1.88	0.91
B0304.2	B0304.2	B0304.2	9.15	8.89	1.2	0.26
cyp-23A1	B0304.3	B0304.3	4.09	2.75	2.52	1.33
B0304.4	B0304.4	B0304.4	8.51	7.64	1.83	0.87
sra-32	B0304.5	B0304.5	2.93	2.07	1.81	0.85
sra-33	B0304.6	B0304.6	2.84	2.81	1.02	0.02
sra-34	B0304.7	B0304.7	4.39	1.68	6.56	2.71	1
sra-35	B0304.8	B0304.8	3.91	2.39	2.87	1.52
sra-36	B0304.9	B0304.9	2.54	1.26	2.43	1.28
B0310.1	B0310.1	B0310.1	4.7	3.66	2.06	1.04
B0310.2	B0310.2	B0310.2.1	5.63	4.11	2.86	1.52
B0310.2	B0310.2	B0310.2.2	5.76	4.3	2.76	1.46
B0310.3	B0310.3	B0310.3	3.8	2.54	2.4	1.26
B0310.4	B0310.4	B0310.4	0	0	1	0
ugt-46	B0310.5	B0310.5	4.63	4.76	0.91	-0.13
B0310.6	B0310.6	B0310.6	5.02	2.21	6.97	2.8	1
cyp-29A4	B0331.1	B0331.1	3.27	2.52	1.68	0.75
B0331.2	B0331.2	B0331.2	3.17	2	2.25	1.17
B0334.1	B0334.1	B0334.1.1	9.41	8.02	2.62	1.39
B0334.1	B0334.1	B0334.1.2	9.58	8.21	2.59	1.37
B0334.10	B0334.10	B0334.10	3.26	3.1	1.12	0.16
ooc-3	B0334.11	B0334.11a	7.57	6.31	2.4	1.26
ooc-3	B0334.11	B0334.11b	7.98	6.57	2.66	1.41
B0334.13	B0334.13	B0334.13	3.56	3.63	0.95	-0.08
twk-5	B0334.2	B0334.2a	6.11	5.25	1.81	0.86
twk-5	B0334.2	B0334.2b	7.06	5.73	2.52	1.33
B0334.3	B0334.3	B0334.3a.1	9.61	8.14	2.76	1.47
B0334.3	B0334.3	B0334.3a.2	9.74	8.31	2.7	1.43
B0334.3	B0334.3	B0334.3b	8.48	7.71	1.71	0.77
B0334.4	B0334.4	B0334.4	8.74	8.16	1.5	0.58
B0334.5	B0334.5	B0334.5	9.1	8.19	1.88	0.91
B0334.6	B0334.6	B0334.6	3.3	2.6	1.62	0.7
srh-44	B0334.7	B0334.7	3.99	2.57	2.68	1.42
age-1	B0334.8	B0334.8	7.45	6.81	1.56	0.65
wrm-1	B0336.1	B0336.1.1	8.63	7.75	1.84	0.88
wrm-1	B0336.1	B0336.1.2	8.7	7.89	1.75	0.81
rpl-23	B0336.10	B0336.10.1	12.04	11.27	1.7	0.77
rpl-23	B0336.10	B0336.10.2	12.04	11.27	1.7	0.77
rpl-23	B0336.10	B0336.10.3	12.27	11.5	1.71	0.77
rpl-23	B0336.10	B0336.10.4	12.27	11.5	1.71	0.77
B0336.11	B0336.11	B0336.11a	5.55	4.75	1.73	0.79
B0336.11	B0336.11	B0336.11b	5.29	4.82	1.39	0.47
B0336.12	B0336.12	B0336.12	3.89	3.36	1.44	0.53
B0336.13	B0336.13	B0336.13	9.09	8.54	1.46	0.55
arf-1.2	B0336.2	B0336.2.1	10.63	10.15	1.39	0.47
arf-1.2	B0336.2	B0336.2.2	10.94	10.4	1.46	0.55
B0336.3	B0336.3	B0336.3	9.63	9.02	1.52	0.6
rgs-5	B0336.4	B0336.4	5.57	4.91	1.58	0.66
B0336.5	B0336.5	B0336.5a	8.31	8.22	1.07	0.09
B0336.5	B0336.5	B0336.5b	7.44	7.3	1.1	0.14
B0336.6	B0336.6	B0336.6.1	9.46	8.64	1.76	0.82
B0336.6	B0336.6	B0336.6.2	9.77	8.89	1.84	0.88
B0336.7	B0336.7	B0336.7a	6.89	6.1	1.73	0.79
B0336.7	B0336.7	B0336.7b.1	6.91	6.1	1.75	0.81
B0336.7	B0336.7	B0336.7b.2	7.6	6.49	2.16	1.11
lgg-3	B0336.8	B0336.8	8.51	7.08	2.69	1.43
swp-1	B0336.9	B0336.9a	7.59	6.64	1.93	0.95
swp-1	B0336.9	B0336.9b.1	7.36	6.38	1.97	0.97
swp-1	B0336.9	B0336.9b.2	7.42	6.49	1.91	0.93
swp-1	B0336.9	B0336.9c	6.24	5.08	2.24	1.16
swp-1	B0336.9	B0336.9d	7.42	6.49	1.91	0.93
swp-1	B0336.9	B0336.9e	6.82	6.28	1.45	0.53
wrt-9	B0344.2	B0344.2	4.21	2.99	2.33	1.22
B0348.1	B0348.1	B0348.1	3.69	1.23	5.52	2.46	1
B0348.2	B0348.2	B0348.2	3.06	2.36	1.62	0.7
egl-8	B0348.4	B0348.4a	8.68	7.24	2.72	1.45
egl-8	B0348.4	B0348.4b	8.57	7.07	2.81	1.49
egl-8	B0348.4	B0348.4c	8.2	7.05	2.21	1.14
B0348.5	B0348.5	B0348.5	2.57	2.77	0.87	-0.2
ife-3	B0348.6	B0348.6a.1	9.84	9.26	1.49	0.57
ife-3	B0348.6	B0348.6a.2	9.5	8.7	1.75	0.8
ife-3	B0348.6	B0348.6b	10.44	10.19	1.18	0.24
ife-3	B0348.6	B0348.6c	10.44	10.19	1.18	0.24
unc-44	B0350.2	B0350.2a.1	10.07	8.79	2.43	1.28
unc-44	B0350.2	B0350.2a.2	9.86	8.48	2.6	1.38
unc-44	B0350.2	B0350.2b.1	10.24	9.03	2.32	1.21
unc-44	B0350.2	B0350.2b.2	10.27	9.06	2.31	1.21
unc-44	B0350.2	B0350.2c.1	10.13	8.83	2.47	1.3
unc-44	B0350.2	B0350.2c.2	9.93	8.54	2.63	1.4
unc-44	B0350.2	B0350.2d.1	9.71	8.23	2.8	1.48
unc-44	B0350.2	B0350.2d.2	10.27	9.06	2.31	1.21
unc-44	B0350.2	B0350.2d.3	10.13	8.93	2.3	1.2
unc-44	B0350.2	B0350.2e.1	10.19	8.88	2.48	1.31
unc-44	B0350.2	B0350.2e.2	9.97	8.56	2.66	1.41
unc-44	B0350.2	B0350.2f.1	9.78	8.16	3.08	1.62
unc-44	B0350.2	B0350.2f.2	9.7	8.13	2.97	1.57
unc-44	B0350.2	B0350.2g.1	10.43	9.03	2.64	1.4
unc-44	B0350.2	B0350.2g.2	9.89	8.38	2.85	1.51
B0350.3	B0350.3	B0350.3	3.66	1.81	3.62	1.85	1
B0353.1	B0353.1	B0353.1	7.69	5.84	3.61	1.85	1
B0361.10	B0361.10	B0361.10	8.69	8.33	1.28	0.36
B0361.11	B0361.11	B0361.11	2.55	1.89	1.58	0.66
B0361.2	B0361.2	B0361.2a	7.57	7	1.49	0.57
B0361.2	B0361.2	B0361.2b	6.25	5.9	1.27	0.35
B0361.3	B0361.3	B0361.3.1	7.95	7.09	1.81	0.86
B0361.3	B0361.3	B0361.3.2	8.09	7.24	1.81	0.86
B0361.4	B0361.4	B0361.4	5.47	3.31	4.47	2.16	1
psd-1	B0361.5	B0361.5a	8.57	7.35	2.33	1.22
psd-1	B0361.5	B0361.5b	8.68	7.33	2.55	1.35
B0361.6	B0361.6	B0361.6	7.8	6.68	2.18	1.13
B0361.7	B0361.7	B0361.7	8.07	7.12	1.93	0.95
B0361.8	B0361.8	B0361.8.1	8.15	7.37	1.72	0.78
B0361.8	B0361.8	B0361.8.2	8.23	7.43	1.74	0.8
B0361.9	B0361.9	B0361.9	7.25	6.15	2.14	1.1
B0365.1	B0365.1	B0365.1	9.94	9.32	1.53	0.62
eat-6	B0365.3	B0365.3.1	10.71	9.56	2.21	1.14
eat-6	B0365.3	B0365.3.2	10.39	9.24	2.22	1.15
eat-6	B0365.3	B0365.3.3	10.71	9.56	2.21	1.14
B0365.5	B0365.5	B0365.5a	4.85	2.97	3.67	1.88	1
B0365.5	B0365.5	B0365.5b	3.86	3.24	1.54	0.62
clec-41	B0365.6	B0365.6.1	6.52	6.75	0.85	-0.23
clec-41	B0365.6	B0365.6.2	6.52	6.75	0.85	-0.23
clec-41	B0365.6	B0365.6.3	6.52	6.75	0.85	-0.23
B0365.7	B0365.7	B0365.7	2.91	2.07	1.79	0.84
B0379.1	B0379.1	B0379.1	7.6	6.72	1.84	0.88
B0379.2	B0379.2	B0379.2	2.99	1.33	3.17	1.66
mut-16	B0379.3	B0379.3a	9.2	8.54	1.58	0.66
mut-16	B0379.3	B0379.3b	9.28	8.62	1.58	0.66
tag-188	B0379.4	B0379.4a	7.81	6.86	1.93	0.95
tag-188	B0379.4	B0379.4b	7.8	6.82	1.97	0.98
B0379.6	B0379.6	B0379.6	5.02	3.2	3.53	1.82	1
B0379.7	B0379.7	B0379.7.1	4.75	3.04	3.28	1.71	1
B0379.7	B0379.7	B0379.7.2	5.18	3.55	3.08	1.62
B0391.10	B0391.10	B0391.10	4.69	4.18	1.42	0.51
B0391.11	B0391.11	B0391.11	3.7	2.22	2.78	1.48
str-263	B0391.12	B0391.12	4.96	3.61	2.56	1.36
B0391.3	B0391.3	B0391.3	2.23	1.43	1.74	0.8
str-12	B0391.4	B0391.4	3.04	1.29	3.36	1.75	1
B0391.5	B0391.5	B0391.5	5.69	5.28	1.32	0.41
B0391.6	B0391.6	B0391.6	4.27	2.56	3.27	1.71	1
B0391.9	B0391.9	B0391.9	5.26	3.37	3.7	1.89	1
rps-0	B0393.1	B0393.1.1	12.39	11.32	2.1	1.07
rps-0	B0393.1	B0393.1.2	12.48	11.4	2.12	1.08
rps-0	B0393.1	B0393.1.3	12.48	11.4	2.12	1.08
rps-0	B0393.1	B0393.1.4	12.48	11.4	2.12	1.08
rbg-3	B0393.2	B0393.2.1	8.24	7.54	1.62	0.7
rbg-3	B0393.2	B0393.2.2	9.02	8.31	1.63	0.71
B0393.3	B0393.3	B0393.3	9.65	9.31	1.27	0.34
B0393.4	B0393.4	B0393.4	3.74	2.15	3	1.59
B0393.5	B0393.5	B0393.5	4.75	2.54	4.62	2.21	1
B0393.6	B0393.6	B0393.6	8.14	7.37	1.7	0.76
B0393.7	B0393.7	B0393.7	4.28	2.87	2.66	1.41
B0393.8	B0393.8	B0393.8	8.38	7.37	2.01	1
B0393.9	B0393.9	B0393.9.1	6.04	4.38	3.15	1.65
B0393.9	B0393.9	B0393.9.2	6.37	4.76	3.04	1.61
nhx-1	B0395.1	B0395.1	5.2	3.45	3.37	1.75	1
B0395.2	B0395.2	B0395.2	4.36	2.85	2.84	1.51
B0395.3	B0395.3	B0395.3.1	7.68	6.79	1.85	0.89
B0395.3	B0395.3	B0395.3.2	7.97	7.05	1.89	0.92
B0399.1	B0399.1	B0399.1a	6.44	4.96	2.79	1.48
B0399.1	B0399.1	B0399.1b	6.56	5.06	2.82	1.5
B0399.1	B0399.1	B0399.1c	6.03	4.62	2.66	1.41
B0399.1	B0399.1	B0399.1d	6.22	4.81	2.66	1.41
B0399.1	B0399.1	B0399.1e	6.64	4.96	3.22	1.69
B0399.2	B0399.2	B0399.2	3.78	2.66	2.17	1.12
ubc-17	B0403.2	B0403.2	4.41	2.89	2.87	1.52
B0403.3	B0403.3	B0403.3	7.1	5.57	2.89	1.53
tag-320	B0403.4	B0403.4	9.47	8.66	1.76	0.81
B0403.5	B0403.5	B0403.5	6.11	3.81	4.93	2.3	1
B0403.6	B0403.6	B0403.6	5.01	3.64	2.59	1.37
B0410.1	B0410.1	B0410.1	5.04	3.07	3.93	1.97	1
vang-1	B0410.2	B0410.2a	6.2	6.77	0.67	-0.57
vang-1	B0410.2	B0410.2b	6.06	6.52	0.72	-0.46
B0410.3	B0410.3	B0410.3	6.48	4.94	2.91	1.54
dac-1	B0412.1	B0412.1a	3.43	2.61	1.77	0.82
dac-1	B0412.1	B0412.1b	3.38	2.4	1.97	0.98
daf-7	B0412.2	B0412.2	5.28	3.56	3.3	1.72	1
B0412.3	B0412.3	B0412.3.1	8.25	7.57	1.6	0.68
B0412.3	B0412.3	B0412.3.2	8.31	7.57	1.67	0.74
rps-29	B0412.4	B0412.4.1	10.2	9.88	1.25	0.32
rps-29	B0412.4	B0412.4.2	10.15	9.86	1.22	0.29
rps-29	B0412.4	B0412.4.3	10.15	9.86	1.22	0.29
rps-29	B0412.4	B0412.4.4	10.2	9.88	1.25	0.32
srz-4	B0414.1	B0414.1	3.91	2.42	2.8	1.49
rnt-1	B0414.2	B0414.2	4.39	2.78	3.06	1.61
hil-5	B0414.3	B0414.3	11.44	11.32	1.09	0.12
cpb-3	B0414.5	B0414.5	8.84	7.99	1.8	0.85
glh-3	B0414.6	B0414.6	7.36	6.55	1.76	0.81
mtk-1	B0414.7	B0414.7a	7.89	6.66	2.34	1.23
mtk-1	B0414.7	B0414.7b	7.92	6.67	2.38	1.25
B0414.8	B0414.8	B0414.8a	7.74	6.91	1.77	0.83
B0414.8	B0414.8	B0414.8b	7.67	6.87	1.74	0.8
B0416.1	B0416.1	B0416.1	4.74	3.13	3.05	1.61
B0416.2	B0416.2	B0416.2	3.69	3.69	1	0
B0416.3	B0416.3	B0416.3	4.71	3.66	2.07	1.05
B0416.4	B0416.4	B0416.4	6.45	7.07	0.65	-0.62
B0416.5	B0416.5	B0416.5a.1	9.67	8.84	1.78	0.83
B0416.5	B0416.5	B0416.5a.2	8.36	7.7	1.58	0.66
B0416.5	B0416.5	B0416.5b	10.01	9.24	1.71	0.78
gly-13	B0416.6	B0416.6	6.49	5.31	2.27	1.18
B0416.7	B0416.7	B0416.7a	2.65	1.99	1.58	0.66
B0416.7	B0416.7	B0416.7b	3.31	1.56	3.35	1.74	1
B0432.1	B0432.1	B0432.1	3.25	1.35	3.74	1.9	1
B0432.10	B0432.10	B0432.10	6.81	6.19	1.54	0.62
B0432.11	B0432.11	B0432.11	4.1	2.29	3.5	1.81	1
B0432.12	B0432.12	B0432.12	3.17	1.73	2.71	1.44
B0432.13	B0432.13	B0432.13.1	7.45	6.03	2.67	1.42
B0432.13	B0432.13	B0432.13.2	7.59	6.21	2.6	1.38
B0432.14	B0432.14	B0432.14	8.2	5.5	6.5	2.7	1
djr-1.1	B0432.2	B0432.2	9.13	8.74	1.31	0.39
B0432.3	B0432.3	B0432.3	8.42	7.52	1.87	0.9
B0432.4	B0432.4	B0432.4	8.31	7.31	2	1
cat-2	B0432.5	B0432.5a	3.83	2.54	2.43	1.28
cat-2	B0432.5	B0432.5b	3.89	2.48	2.66	1.41
B0432.6	B0432.6	B0432.6	6.41	6.19	1.17	0.22
B0432.7	B0432.7	B0432.7	5.51	4.55	1.94	0.96
B0432.8	B0432.8	B0432.8	7.31	6.71	1.52	0.6
B0432.9	B0432.9	B0432.9	4.78	3.17	3.05	1.61
lin-8	B0454.1	B0454.1	7.41	6.92	1.4	0.49
sri-30	B0454.10	B0454.10	4.81	2.39	5.36	2.42	1
sri-31	B0454.2	B0454.2	4.43	2.47	3.88	1.96	1
sri-28	B0454.3	B0454.3	3.04	2.03	2	1
sri-29	B0454.4	B0454.4	2.59	2.58	1.01	0.01
B0454.5	B0454.5	B0454.5	5.26	5.87	0.66	-0.61
B0454.6	B0454.6	B0454.6	4.98	4.16	1.77	0.82
clec-2	B0454.7	B0454.7	2.89	2.32	1.49	0.57
B0454.8	B0454.8	B0454.8	4.25	3.41	1.78	0.83
B0454.9	B0454.9	B0454.9	6.16	5.62	1.46	0.55
lat-1	B0457.1	B0457.1a	9.8	8.92	1.84	0.88
lat-1	B0457.1	B0457.1b	9.56	8.42	2.21	1.14
lat-1	B0457.1	B0457.1c	9.79	8.59	2.3	1.2
B0457.2	B0457.2	B0457.2	5.8	4.37	2.69	1.43
B0457.4	B0457.4	B0457.4	3.81	2.26	2.94	1.55
B0457.6	B0457.6	B0457.6	7.62	6.39	2.35	1.24
B0462.1	B0462.1	B0462.1	2.8	2.58	1.17	0.22
fbxb-119	B0462.3	B0462.3	2.32	2.34	0.99	-0.02
B0462.4	B0462.4	B0462.4	3.47	2.43	2.06	1.04
drs-1	B0464.1	B0464.1.1	9.61	8.43	2.26	1.18
drs-1	B0464.1	B0464.1.2	9.87	8.61	2.38	1.25
B0464.2	B0464.2	B0464.2	8.6	7.82	1.72	0.78
nlp-36	B0464.3	B0464.3.1	9.78	8.92	1.82	0.86
nlp-36	B0464.3	B0464.3.2	9.78	8.92	1.82	0.86
bre-3	B0464.4	B0464.4.1	8.37	7.03	2.53	1.34
bre-3	B0464.4	B0464.4.2	9.41	7.87	2.91	1.54
spk-1	B0464.5	B0464.5a	10.26	9.43	1.78	0.84
spk-1	B0464.5	B0464.5b.1	10.28	9.37	1.88	0.91
spk-1	B0464.5	B0464.5b.2	10.46	9.58	1.83	0.87
spk-1	B0464.5	B0464.5c.1	10.01	9.01	2	1
spk-1	B0464.5	B0464.5c.2	9.87	8.91	1.94	0.96
B0464.6	B0464.6	B0464.6.1	8.79	7.97	1.76	0.82
B0464.6	B0464.6	B0464.6.2	8.88	8.08	1.75	0.81
B0464.6	B0464.6	B0464.6.3	8.94	8.19	1.68	0.75
baf-1	B0464.7	B0464.7.1	10.41	9.99	1.33	0.41
baf-1	B0464.7	B0464.7.2	6.99	6.74	1.19	0.26
tag-342	B0464.8	B0464.8	7.98	7.69	1.22	0.28
B0464.9	B0464.9	B0464.9	8.44	8.18	1.2	0.26
jnk-1	B0478.1	B0478.1a	4.37	2.98	2.62	1.39
jnk-1	B0478.1	B0478.1b.1	4.39	2.97	2.67	1.42
jnk-1	B0478.1	B0478.1b.2	4.39	2.97	2.67	1.42
jnk-1	B0478.1	B0478.1b.3	4.37	2.98	2.62	1.39
jnk-1	B0478.1	B0478.1b.4	4.39	2.97	2.67	1.42
B0478.3	B0478.3	B0478.3	2.46	1.9	1.48	0.56
B0491.1	B0491.1	B0491.1	7.79	6.99	1.74	0.8
sqt-1	B0491.2	B0491.2.1	5.39	4.49	1.87	0.9
sqt-1	B0491.2	B0491.2.2	5.33	4.47	1.82	0.87
sqt-1	B0491.2	B0491.2.3	5.24	4.91	1.25	0.33
B0491.3	B0491.3	B0491.3	4.45	2.09	5.15	2.36	1
B0491.4	B0491.4	B0491.4	4.22	2.75	2.76	1.47
B0491.5	B0491.5	B0491.5.1	8.92	7.55	2.58	1.37
B0491.5	B0491.5	B0491.5.2	8.63	7.31	2.49	1.31
B0491.5	B0491.5	B0491.5.3	9.73	8.85	1.83	0.87
B0491.5	B0491.5	B0491.5.4	9.71	8.83	1.84	0.88
B0491.6	B0491.6	B0491.6.1	6.83	6.07	1.69	0.76
B0491.6	B0491.6	B0491.6.2	5.89	5.24	1.57	0.65
B0491.7	B0491.7	B0491.7	7.92	7.48	1.36	0.44
clh-2	B0491.8	B0491.8a	5.07	3.08	3.96	1.99	1
clh-2	B0491.8	B0491.8b	5.12	3.06	4.18	2.06	1
clh-2	B0491.8	B0491.8c	5.32	3.2	4.33	2.11	1
sre-1	B0495.1	B0495.1	4.21	1.31	7.45	2.9	1
tag-178	B0495.10	B0495.10a	5.8	3.41	5.25	2.39	1
tag-178	B0495.10	B0495.10b	6.13	3.73	5.26	2.39	1
tag-178	B0495.10	B0495.10c	5.7	3.37	5.03	2.33	1
B0495.2	B0495.2	B0495.2	8.31	7.59	1.64	0.72
nhx-2	B0495.4	B0495.4	7.34	4.93	5.33	2.41	1
B0495.5	B0495.5	B0495.5.1	7.03	5.93	2.15	1.11
B0495.5	B0495.5	B0495.5.2	7.1	6.03	2.1	1.07
B0495.6	B0495.6	B0495.6	8.38	7.13	2.38	1.25
B0495.7	B0495.7	B0495.7.1	8.51	7.6	1.88	0.91
B0495.7	B0495.7	B0495.7.2	8.33	7.47	1.81	0.85
B0495.8	B0495.8	B0495.8a	8.53	7.54	1.99	0.99
B0495.8	B0495.8	B0495.8b	7.96	6.58	2.61	1.38
B0495.9	B0495.9	B0495.9	7.4	6.55	1.8	0.85
B0496.1	B0496.1	B0496.1	3.09	2.17	1.9	0.92
B0496.2	B0496.2	B0496.2	3.79	2.27	2.87	1.52
B0496.3	B0496.3	B0496.3a	6.6	4.75	3.6	1.85	1
B0496.3	B0496.3	B0496.3b	6.55	4.78	3.41	1.77	1
B0496.3	B0496.3	B0496.3c	6.93	4.88	4.13	2.05	1
B0496.4	B0496.4	B0496.4	5.08	2.08	7.99	3	1
B0496.5	B0496.5	B0496.5	2.97	1.63	2.53	1.34
B0496.6	B0496.6	B0496.6	2.38	1.49	1.86	0.89
B0496.7	B0496.7	B0496.7	7.08	6.1	1.96	0.97
tag-224	B0496.8	B0496.8	7.84	6.41	2.7	1.43
B0507.1	B0507.1	B0507.1	5.3	3.78	2.88	1.53
B0507.10	B0507.10	B0507.10	6.74	4.22	5.74	2.52	1
srx-115	B0507.11	B0507.11	3.3	2.07	2.35	1.23
B0507.2	B0507.2	B0507.2	8.52	6.15	5.17	2.37	1
B0507.3	B0507.3	B0507.3a	7.08	4.26	7.06	2.82	1
B0507.3	B0507.3	B0507.3b	7.31	5.69	3.08	1.62
B0507.4	B0507.4	B0507.4	2.72	1.55	2.24	1.16
B0507.5	B0507.5	B0507.5	2.84	2.4	1.35	0.44
B0507.6	B0507.6	B0507.6	4.98	2.33	6.28	2.65	1
B0507.7	B0507.7	B0507.7	3.61	1.33	4.88	2.29	1
B0507.8	B0507.8	B0507.8	5.52	2.93	5.99	2.58	1
B0507.9	B0507.9	B0507.9	3.98	1.82	4.47	2.16	1
fkb-7	B0511.1	B0511.1	5.11	4.47	1.56	0.64
eif-3.E	B0511.10	B0511.10	8.71	7.85	1.82	0.86
B0511.11	B0511.11	B0511.11	4.84	3.79	2.07	1.05
B0511.12	B0511.12	B0511.12	8.56	7.38	2.27	1.18
B0511.13	B0511.13	B0511.13	6.73	6.28	1.36	0.45
B0511.14	B0511.14	B0511.14a	6.1	4.94	2.22	1.15
B0511.14	B0511.14	B0511.14b	5.6	4.41	2.29	1.19
B0511.2	B0511.2	B0511.2	4.93	4.39	1.46	0.54
fbxa-125	B0511.3	B0511.3	3.34	2.26	2.12	1.08
tag-344	B0511.4	B0511.4	3.37	1.15	4.65	2.22	1
B0511.5	B0511.5	B0511.5	3.37	2.68	1.61	0.69
B0511.6	B0511.6	B0511.6.1	8.83	7.75	2.12	1.08
B0511.6	B0511.6	B0511.6.2	9.16	8.15	2.01	1.01
B0511.7	B0511.7	B0511.7	8.72	7.81	1.88	0.91
tag-264	B0511.8	B0511.8.1	6.84	6.33	1.43	0.52
tag-264	B0511.8	B0511.8.2	7.09	6.74	1.28	0.35
mat-4	B0511.9	B0511.9a	8.74	8.24	1.42	0.5
mat-4	B0511.9	B0511.9b	8.69	8.03	1.57	0.65
lin-66	B0513.1	B0513.1	9.5	9.07	1.35	0.43
B0513.2	B0513.2	B0513.2	8.41	7.79	1.54	0.62
rpl-29	B0513.3	B0513.3.1	11.97	11.2	1.7	0.76
rpl-29	B0513.3	B0513.3.2	12.7	11.92	1.72	0.78
B0513.4	B0513.4	B0513.4	8.98	8.67	1.24	0.31
B0513.5	B0513.5	B0513.5	5.72	4.76	1.95	0.96
B0513.6	B0513.6	B0513.6	4.86	2.05	7	2.81	1
B0513.9	B0513.9	B0513.9a	6.5	4.23	4.83	2.27	1
B0513.9	B0513.9	B0513.9b.1	6.46	4.21	4.74	2.24	1
B0513.9	B0513.9	B0513.9b.2	6.53	4.73	3.5	1.81	1
kin-31	B0523.1	B0523.1	3.94	2.88	2.1	1.07
pgl-2	B0523.3	B0523.3	7.48	6.89	1.51	0.59
fli-1	B0523.5	B0523.5	7.48	6.17	2.48	1.31
B0524.1	B0524.1	B0524.1	8.2	7.29	1.88	0.91
B0524.2	B0524.2	B0524.2	4.77	2.55	4.63	2.21	1
B0524.3	B0524.3	B0524.3	4.39	2.47	3.78	1.92	1
B0524.4	B0524.4	B0524.4	3.42	2.65	1.7	0.76
B0524.5	B0524.5	B0524.5	2.46	1.08	2.61	1.38
B0524.6	B0524.6	B0524.6	6.89	6.55	1.27	0.34
B0524.7	B0524.7	B0524.7	7.48	7.43	1.04	0.05
tpa-1	B0545.1	B0545.1a	7.78	6.08	3.24	1.7
tpa-1	B0545.1	B0545.1b.1	7.52	6.15	2.6	1.38
tpa-1	B0545.1	B0545.1b.2	7.82	6.33	2.82	1.5
B0545.3	B0545.3	B0545.3	6.03	3.03	7.99	3	1
B0545.4	B0545.4	B0545.4	3.39	3.27	1.09	0.13
37377	B0546.1	B0546.1.1	10.12	10.38	0.84	-0.26
37377	B0546.1	B0546.1.2	6.75	6.92	0.89	-0.17
37377	B0546.1	B0546.1.3	10.12	10.38	0.84	-0.26
B0546.2	B0546.2	B0546.2.1	7.78	6.92	1.81	0.85
B0546.2	B0546.2	B0546.2.2	8.1	7.11	2	1
B0546.3	B0546.3	B0546.3	7.43	7.02	1.33	0.41
B0546.4	B0546.4	B0546.4a	8.41	7.18	2.33	1.22
B0546.4	B0546.4	B0546.4b	8.04	6.58	2.75	1.46
B0546.5	B0546.5	B0546.5	3.62	1.37	4.74	2.25	1
csn-5	B0547.1	B0547.1.1	9.63	8.75	1.85	0.89
csn-5	B0547.1	B0547.1.2	9.75	8.93	1.76	0.82
B0547.2	B0547.2	B0547.2	3.85	1.07	6.88	2.78	1
srd-8	B0547.4	B0547.4	2.97	1.55	2.69	1.43
B0554.1	B0554.1	B0554.1	1.22	2.06	0.56	-0.85		1
B0554.2	B0554.2	B0554.2	3.27	2.04	2.35	1.23
B0554.3	B0554.3	B0554.3	1.4	2.16	0.59	-0.76
B0554.4	B0554.4	B0554.4	3.19	1.43	3.38	1.76	1
B0554.5	B0554.5	B0554.5	3.54	2.55	1.98	0.99
dod-20	B0554.6	B0554.6	4.26	2.38	3.69	1.88	1
B0554.7	B0554.7	B0554.7	3.31	2.27	2.06	1.04
B0563.1	B0563.1	B0563.1	2.13	3.64	0.35	-1.51		1
tsp-11	B0563.2	B0563.2	4.65	3.62	2.04	1.03
tag-132	B0563.4	B0563.4	8.05	7.1	1.94	0.95
B0563.5	B0563.5	B0563.5	5.65	4.94	1.64	0.71
B0563.6	B0563.6	B0563.6a	4.38	4.14	1.18	0.24
B0563.6	B0563.6	B0563.6b.1	4.95	4.33	1.54	0.62
B0563.6	B0563.6	B0563.6b.2	4.82	4.22	1.51	0.6
B0563.7	B0563.7	B0563.7	4.44	3.77	1.59	0.67
B0563.8	B0563.8	B0563.8	2.5	3.05	0.68	-0.55
B0563.9	B0563.9	B0563.9	2.87	3.87	0.5	-1		1
unc-30	B0564.10	B0564.10a	4.13	3.05	2.1	1.07
unc-30	B0564.10	B0564.10b	4.37	3.05	2.49	1.32
B0564.11	B0564.11	B0564.11	7.77	7.02	1.69	0.75
B0564.1	B0564.1	B0564.1a	8.37	7.35	2.03	1.02
tin-9.2	B0564.1	B0564.1b.1	8.36	7.29	2.1	1.07
tin-9.2	B0564.1	B0564.1b.2	8.58	7.55	2.04	1.03
B0564.2	B0564.2	B0564.2	6.77	6.2	1.48	0.57
B0564.3	B0564.3	B0564.3.1	8.13	5.52	6.12	2.61	1
B0564.3	B0564.3	B0564.3.2	8.13	5.52	6.12	2.61	1
B0564.4	B0564.4	B0564.4	4.37	2.66	3.27	1.71	1
B0564.6	B0564.6	B0564.6a	5.45	4.69	1.7	0.76
B0564.6	B0564.6	B0564.6b	6	5.03	1.96	0.97
B0564.7	B0564.7	B0564.7.1	8.23	7.23	2	1
B0564.7	B0564.7	B0564.7.2	8.26	7.3	1.95	0.96
B0564.9	B0564.9	B0564.9	5.25	4.04	2.31	1.21
BE0003N10.1	BE0003N10.1	BE0003N10.1	6.82	6.28	1.45	0.53
BE0003N10.2	BE0003N10.2	BE0003N10.2	7.12	6.51	1.52	0.61
BE0003N10.3	BE0003N10.3	BE0003N10.3	4.49	3.16	2.5	1.32
BE10.1	BE10.1	BE10.1	4.25	1.57	6.41	2.68	1
BE10.2	BE10.2	BE10.2	4.58	3.19	2.63	1.4
BE10.3	BE10.3	BE10.3	3.33	2.61	1.65	0.72
BE10.4	BE10.4	BE10.4	3.7	3.15	1.47	0.55
BE10.5	BE10.5	BE10.5	2.86	1.84	2.03	1.02
C01A2.1	C01A2.1	C01A2.1	4.37	2.15	4.65	2.22	1
C01A2.2	C01A2.2	C01A2.2	5.75	4.47	2.43	1.28
C01A2.3	C01A2.3	C01A2.3	6.54	5.9	1.56	0.64
C01A2.4	C01A2.4	C01A2.4	7.8	7.29	1.43	0.51
C01A2.5	C01A2.5	C01A2.5	5.82	6.83	0.5	-1.01		1
C01A2.6	C01A2.6	C01A2.6	4.02	2.24	3.44	1.78	1
nlp-38	C01A2.7	C01A2.7.1	6.16	3.95	4.62	2.21	1
nlp-38	C01A2.7	C01A2.7.2	6.16	4.04	4.37	2.13	1
drh-2	C01B10.1	C01B10.1	7.34	4.93	5.29	2.4	1
C01B10.10	C01B10.10	C01B10.10	4.78	3.6	2.27	1.18
C01B10.11	C01B10.11	C01B10.11	7.27	6.54	1.67	0.74
C01B10.3	C01B10.3	C01B10.3	7.02	5.45	2.98	1.58
C01B10.4	C01B10.4	C01B10.4	3.71	2.72	1.99	0.99
hil-7	C01B10.5	C01B10.5a	7.69	5.32	5.17	2.37	1
hil-7	C01B10.5	C01B10.5b.1	8.72	6.41	4.95	2.31	1
hil-7	C01B10.5	C01B10.5b.2	8.96	6.54	5.35	2.42	1
hil-7	C01B10.5	C01B10.5c	8.66	6.32	5.08	2.35	1
hil-7	C01B10.5	C01B10.5e	10.14	7.99	4.46	2.16	1
C01B10.6	C01B10.6	C01B10.6a.1	10.4	8.77	3.1	1.63
C01B10.6	C01B10.6	C01B10.6a.2	10.4	8.77	3.1	1.63
C01B10.6	C01B10.6	C01B10.6b	10.19	8.61	2.99	1.58
C01B10.7	C01B10.7	C01B10.7	2.98	2.07	1.88	0.91
C01B10.8	C01B10.8	C01B10.8.1	8.65	7.47	2.28	1.19
C01B10.8	C01B10.8	C01B10.8.2	8.69	7.56	2.19	1.13
C01B10.9	C01B10.9	C01B10.9	8.13	7.15	1.97	0.98
sqt-2	C01B12.1	C01B12.1	6.05	5.5	1.47	0.56
C01B12.2	C01B12.2	C01B12.2	7.1	6.34	1.69	0.76
C01B12.3	C01B12.3	C01B12.3	4.62	3.07	2.94	1.55
C01B12.4	C01B12.4	C01B12.4	3.02	2.85	1.13	0.17
C01B12.5	C01B12.5	C01B12.5	3.72	1.96	3.39	1.76	1
C01B12.7	C01B12.7	C01B12.7	6.39	4.91	2.78	1.47
C01B12.8	C01B12.8	C01B12.8	7.67	7.82	0.9	-0.15
str-257	C01B4.1	C01B4.1	2.39	1.4	1.99	0.99
str-76	C01B4.10	C01B4.10	2.85	1.94	1.88	0.91
str-258	C01B4.3	C01B4.3	2.35	1.95	1.32	0.4
srd-61	C01B4.5	C01B4.5	3.87	2.72	2.21	1.14
C01B4.6	C01B4.6	C01B4.6	6.83	6.34	1.4	0.48
C01B4.7	C01B4.7	C01B4.7	7.55	5.67	3.68	1.88	1
C01B4.8	C01B4.8	C01B4.8	4.13	2.44	3.22	1.69
C01B4.9	C01B4.9	C01B4.9	8.91	8.59	1.25	0.32
C01B7.1	C01B7.1	C01B7.1a.1	6.75	6.04	1.63	0.71
C01B7.1	C01B7.1	C01B7.1a.2	6.76	6.06	1.63	0.7
C01B7.1	C01B7.1	C01B7.1b	8.21	6.74	2.77	1.47
C01B7.3	C01B7.3	C01B7.3	3.1	2.27	1.78	0.83
tag-117	C01B7.4	C01B7.4	6.02	5.17	1.81	0.85
C01B7.5	C01B7.5	C01B7.5	5.5	2.35	8.88	3.15	1
rpm-1	C01B7.6	C01B7.6	7.43	5.65	3.44	1.78	1
C01B7.7	C01B7.7	C01B7.7	3.45	3.44	1.01	0.01
C01B9.1	C01B9.1	C01B9.1	4.41	2.59	3.53	1.82	1
clc-2	C01C10.1	C01C10.1	5.88	4.11	3.42	1.77	1
C01C10.2	C01C10.2	C01C10.2a	6.72	5.21	2.85	1.51
C01C10.2	C01C10.2	C01C10.2b	6.41	4.28	4.38	2.13	1
acl-12	C01C10.3	C01C10.3	8.93	6.75	4.54	2.18	1
clc-5	C01C10.4	C01C10.4	5.94	5.03	1.87	0.9
nlp-1	C01C4.1	C01C4.1	6.6	5.25	2.55	1.35
C01C4.2	C01C4.2	C01C4.2	2.94	2.03	1.88	0.91
C01C4.3	C01C4.3	C01C4.3a	6.12	4.62	2.83	1.5
C01C4.3	C01C4.3	C01C4.3b	6.38	4.95	2.7	1.43
ark-1	C01C7.1	C01C7.1	7.63	6.42	2.32	1.21
C01F1.1	C01F1.1	C01F1.1	8.24	7.82	1.34	0.42
C01F1.2	C01F1.2	C01F1.2	7.62	7.08	1.45	0.54
C01F1.3	C01F1.3	C01F1.3a.1	6.46	5.87	1.51	0.6
C01F1.3	C01F1.3	C01F1.3a.2	6.51	5.88	1.55	0.63
C01F1.3	C01F1.3	C01F1.3b	6.04	5.62	1.34	0.43
C01F1.4	C01F1.4	C01F1.4	4.91	3.86	2.07	1.05
C01F1.5	C01F1.5	C01F1.5	4.91	3.6	2.48	1.31
C01F1.6	C01F1.6	C01F1.6	8.24	7.41	1.78	0.83
C01F4.2	C01F4.2	C01F4.2a	5.22	3.77	2.73	1.45
C01F4.2	C01F4.2	C01F4.2b	5.22	3.37	3.59	1.84	1
C01F6.1	C01F6.1	C01F6.1	7.77	6.54	2.35	1.23
C01F6.2	C01F6.2	C01F6.2	4.3	2.7	3.03	1.6
fem-3	C01F6.4	C01F6.4	7.72	6.74	1.97	0.98
aly-1	C01F6.5	C01F6.5	9.22	9.21	1	0.01
tag-60	C01F6.6	C01F6.6a	9.19	7.46	3.31	1.73	1
tag-60	C01F6.6	C01F6.6b	9.1	7.39	3.26	1.7
tag-60	C01F6.6	C01F6.6c	9.08	7.41	3.19	1.67
tag-60	C01F6.6	C01F6.6d	8.98	7.28	3.26	1.7
tag-60	C01F6.6	C01F6.6e.1	9.08	7.3	3.43	1.78	1
tag-60	C01F6.6	C01F6.6e.2	9.24	7.62	3.07	1.62
tag-60	C01F6.6	C01F6.6e.3	9.04	7.34	3.26	1.7
tag-60	C01F6.6	C01F6.6e.4	9.19	7.46	3.31	1.73	1
tag-60	C01F6.6	C01F6.6e.5	9.39	7.65	3.35	1.74	1
icl-1	C01F6.8	C01F6.8a	8.8	8.04	1.69	0.76
icl-1	C01F6.8	C01F6.8b	8.56	7.98	1.5	0.58
C01F6.9	C01F6.9	C01F6.9	10.08	9.49	1.5	0.58
C01G10.1	C01G10.1	C01G10.1	4.14	1.97	4.48	2.16	1
C01G10.10	C01G10.10	C01G10.10	6.61	5.79	1.77	0.82
unc-76	C01G10.11	C01G10.11a.1	8.93	7.94	1.98	0.98
unc-76	C01G10.11	C01G10.11a.2	9.17	8	2.26	1.17
unc-76	C01G10.11	C01G10.11b.1	8.64	7.63	2.03	1.02
unc-76	C01G10.11	C01G10.11b.2	8.93	7.65	2.43	1.28
dnj-3	C01G10.12	C01G10.12	5.73	5.04	1.61	0.69
C01G10.14	C01G10.14	C01G10.14	3.09	1.55	2.91	1.54
C01G10.15	C01G10.15	C01G10.15	1.72	1.28	1.36	0.44
C01G10.16	C01G10.16	C01G10.16	3.31	2.44	1.82	0.86
C01G10.17	C01G10.17	C01G10.17	2.57	2.33	1.18	0.24
srx-79	C01G10.2	C01G10.2	3.3	2.06	2.36	1.24
srx-78	C01G10.3	C01G10.3	1.82	1.31	1.43	0.51
C01G10.4	C01G10.4	C01G10.4	2.2	2.72	0.7	-0.52
C01G10.5	C01G10.5	C01G10.5	2.9	2.23	1.59	0.67
C01G10.6	C01G10.6	C01G10.6	3.86	1.95	3.76	1.91	1
C01G10.7	C01G10.7	C01G10.7	8.01	7.73	1.21	0.27
C01G10.8	C01G10.8	C01G10.8.1	8.92	7.85	2.09	1.07
C01G10.8	C01G10.8	C01G10.8.2	9.44	8.19	2.37	1.25
C01G10.9	C01G10.9	C01G10.9	7.8	6.73	2.09	1.06
C01G12.1	C01G12.1	C01G12.1	5.02	4.65	1.29	0.37
nspb-8	C01G12.10	C01G12.10	1.92	1.36	1.47	0.56
nspb-9	C01G12.11	C01G12.11	4.81	1.44	10.35	3.37	1
C01G12.13	C01G12.13	C01G12.13	3.04	2.24	1.74	0.8
nspb-7	C01G12.2	C01G12.2	2.68	2.38	1.23	0.3
C01G12.3	C01G12.3	C01G12.3	3.95	3.85	1.07	0.1
C01G12.5	C01G12.5	C01G12.5	2.79	2.03	1.69	0.76
nspb-10	C01G12.6	C01G12.6	5.6	3.89	3.25	1.7
C01G12.7	C01G12.7	C01G12.7	4.3	2.61	3.21	1.68
C01G12.8	C01G12.8	C01G12.8	4.34	2.76	2.98	1.58
C01G12.9	C01G12.9	C01G12.9	2.69	2.02	1.59	0.67
tag-292	C01G5.2	C01G5.2	8.36	7.66	1.63	0.7
C01G5.3	C01G5.3	C01G5.3	3.67	3.57	1.07	0.1
C01G5.4	C01G5.4	C01G5.4	3.6	2.2	2.63	1.39
C01G5.5	C01G5.5	C01G5.5	6.91	6.65	1.2	0.26
C01G5.6	C01G5.6	C01G5.6	8.53	8.37	1.12	0.16
C01G5.7	C01G5.7	C01G5.7	2.86	2.16	1.62	0.7
C01G5.8	C01G5.8	C01G5.8	7.38	6.36	2.03	1.02
C01G5.9	C01G5.9	C01G5.9	3.49	2.37	2.16	1.11
aqp-2	C01G6.1	C01G6.1a.1	10.51	8.6	3.75	1.91	1
aqp-2	C01G6.1	C01G6.1a.2	9.34	7.33	4.03	2.01	1
aqp-2	C01G6.1	C01G6.1b.1	8.9	6.99	3.76	1.91	1
aqp-2	C01G6.1	C01G6.1b.2	9.98	8.23	3.38	1.76	1
C01G6.2	C01G6.2	C01G6.2	3.31	2.18	2.19	1.13
C01G6.3	C01G6.3	C01G6.3	10	10.32	0.8	-0.32
C01G6.4	C01G6.4	C01G6.4	8.24	7.65	1.5	0.59
C01G6.5	C01G6.5	C01G6.5	9.59	8.58	2	1
tag-165	C01G6.6	C01G6.6a.1	9.15	7.96	2.27	1.18
tag-165	C01G6.6	C01G6.6a.2	9.32	8.24	2.11	1.07
tag-165	C01G6.6	C01G6.6a.3	9.32	8.24	2.11	1.07
tag-165	C01G6.6	C01G6.6b	9.4	8.21	2.28	1.19
C01G6.7	C01G6.7	C01G6.7	6.09	4.98	2.15	1.11
cam-1	C01G6.8	C01G6.8a	7.94	6.66	2.43	1.28
cam-1	C01G6.8	C01G6.8b	7.94	6.66	2.43	1.28
cam-1	C01G6.8	C01G6.8c	7.94	6.66	2.43	1.28
C01G6.9	C01G6.9	C01G6.9	4.24	3.17	2.11	1.07
C01G8.1	C01G8.1	C01G8.1	9.42	8.38	2.05	1.04
cln-3.2	C01G8.2	C01G8.2.1	5.58	4.99	1.5	0.58
cln-3.2	C01G8.2	C01G8.2.2	5.51	5.06	1.37	0.45
dhs-1	C01G8.3	C01G8.3	8.33	7.32	2.02	1.02
dnj-4	C01G8.4	C01G8.4	5.86	4.62	2.35	1.23
erm-1	C01G8.5	C01G8.5a.1	9.72	8.49	2.35	1.24
erm-1	C01G8.5	C01G8.5a.2	9.72	8.49	2.35	1.24
erm-1	C01G8.5	C01G8.5b	9.62	8.11	2.86	1.52
C01G8.6	C01G8.6	C01G8.6	7.72	6.7	2.02	1.02
lss-4	C01G8.9	C01G8.9a	9.71	8.52	2.29	1.19
lss-4	C01G8.9	C01G8.9b	10	9	1.99	1
col-61	C01H6.1	C01H6.1	2.63	1.8	1.78	0.83
C01H6.2	C01H6.2	C01H6.2	3.74	2.31	2.69	1.43
C01H6.3	C01H6.3	C01H6.3	3.14	4.14	0.5	-0.99		1
C01H6.4	C01H6.4	C01H6.4	5.16	3.44	3.29	1.72	1
nhr-23	C01H6.5	C01H6.5a	7.59	6.42	2.26	1.18
nhr-23	C01H6.5	C01H6.5b.1	7.39	6.37	2.03	1.02
nhr-23	C01H6.5	C01H6.5b.2	8.03	6.99	2.06	1.04
nhr-23	C01H6.5	C01H6.5b.3	7.93	6.84	2.12	1.08
nhr-23	C01H6.5	C01H6.5c	7.6	6.58	2.03	1.02
nhr-23	C01H6.5	C01H6.5d	7.43	6.83	1.52	0.6
nhr-23	C01H6.5	C01H6.5e.1	7.93	6.84	2.12	1.08
nhr-23	C01H6.5	C01H6.5e.2	8.08	7.07	2.01	1
nhr-23	C01H6.5	C01H6.5f.1	8.04	6.98	2.08	1.06
nhr-23	C01H6.5	C01H6.5f.2	8.04	6.98	2.08	1.06
C01H6.6	C01H6.6	C01H6.6	6.49	5.14	2.55	1.35
tag-298	C01H6.7	C01H6.7	7.99	7.41	1.5	0.58
C01H6.8	C01H6.8	C01H6.8	4.5	2.23	4.82	2.27	1
C01H6.9	C01H6.9	C01H6.9	6.56	5.48	2.12	1.08
gst-33	C02A12.1	C02A12.1	5.27	2.38	7.39	2.89	1
srbc-33	C02A12.10	C02A12.10	3.47	1.77	3.23	1.69
srbc-29	C02A12.2	C02A12.2	3.56	1.84	3.28	1.71	1
srbc-30	C02A12.3	C02A12.3	1.62	1.43	1.13	0.18
lys-7	C02A12.4	C02A12.4.1	11.05	9.63	2.68	1.42
lys-7	C02A12.4	C02A12.4.2	11.29	9.9	2.62	1.39
srbc-32	C02A12.5	C02A12.5	3.11	1.77	2.52	1.33
srbc-36	C02A12.6	C02A12.6	2.95	2.1	1.8	0.84
C02A12.8	C02A12.8	C02A12.8	3.7	1.95	3.37	1.75	1
srbc-31	C02A12.9	C02A12.9	3.19	2.12	2.09	1.07
C02B10.1	C02B10.1	C02B10.1	9.6	8.84	1.69	0.76
C02B10.2	C02B10.2	C02B10.2	7.85	7.47	1.3	0.38
C02B10.3	C02B10.3	C02B10.3.1	7.16	5.83	2.52	1.33
C02B10.3	C02B10.3	C02B10.3.2	7.83	6.8	2.05	1.04
C02B10.4	C02B10.4	C02B10.4.1	9.2	8.53	1.58	0.66
C02B10.4	C02B10.4	C02B10.4.2	9.7	9.19	1.43	0.51
C02B10.5	C02B10.5	C02B10.5.1	9.05	8.17	1.84	0.88
C02B10.5	C02B10.5	C02B10.5.2	8.69	7.82	1.82	0.87
C02B10.5	C02B10.5	C02B10.5.3	8.66	7.8	1.82	0.86
C02B10.6	C02B10.6	C02B10.6	5.11	2.79	4.98	2.32	1
adt-1	C02B4.1	C02B4.1	4.76	2.89	3.65	1.87	1
nhr-17	C02B4.2	C02B4.2	6.46	5.6	1.81	0.86
C02B4.3	C02B4.3	C02B4.3	4.68	1.68	8.01	3	1
C02B8.1	C02B8.1	C02B8.1.1	5.3	5.31	0.99	-0.01
C02B8.1	C02B8.1	C02B8.1.2	5.41	5.53	0.92	-0.12
C02B8.2	C02B8.2	C02B8.2	3.8	2.6	2.31	1.21
C02B8.3	C02B8.3	C02B8.3	6.51	4.64	3.64	1.87	1
hlh-8	C02B8.4	C02B8.4	5.71	4.53	2.26	1.18
C02B8.5	C02B8.5	C02B8.5	3.89	2.15	3.33	1.74	1
C02B8.6	C02B8.6	C02B8.6	6.55	3.89	6.31	2.66	1
C02B8.7	C02B8.7	C02B8.7	2.9	3.53	0.64	-0.63
tyr-1	C02C2.1	C02C2.1.1	5.91	5.76	1.11	0.14
tyr-1	C02C2.1	C02C2.1.2	5.91	5.78	1.1	0.13
cup-4	C02C2.3	C02C2.3	4.6	4.09	1.43	0.51
C02C2.4	C02C2.4	C02C2.4	5.11	2.83	4.86	2.28	1
C02C2.5	C02C2.5	C02C2.5	3.8	3.67	1.09	0.13
dyn-1	C02C6.1	C02C6.1a	9.03	8.14	1.85	0.89
dyn-1	C02C6.1	C02C6.1b	9.33	8.62	1.63	0.71
C02C6.2	C02C6.2	C02C6.2a	6.55	4.94	3.04	1.61
C02C6.2	C02C6.2	C02C6.2b	7.11	5.63	2.8	1.48
C02C6.3	C02C6.3	C02C6.3a	6.81	5.71	2.14	1.1
C02C6.3	C02C6.3	C02C6.3b	6.92	5.95	1.95	0.97
C02D4.1	C02D4.1	C02D4.1	2.82	2.2	1.54	0.62
ser-2	C02D4.2	C02D4.2a	4.33	2.93	2.65	1.41
ser-2	C02D4.2	C02D4.2b	4.34	2.99	2.55	1.35
ser-2	C02D4.2	C02D4.2c	3.46	2.75	1.63	0.71
ser-2	C02D4.2	C02D4.2d	3.47	2.24	2.33	1.22
ser-2	C02D4.2	C02D4.2e	4.34	2.93	2.66	1.41
ser-2	C02D4.2	C02D4.2f	4.19	2.78	2.65	1.41
C02D5.1	C02D5.1	C02D5.1	3.84	2.88	1.95	0.96
C02D5.2	C02D5.2	C02D5.2a	5.57	4.02	2.93	1.55
C02D5.2	C02D5.2	C02D5.2b	5.98	4.21	3.42	1.77	1
C02D5.3	C02D5.3	C02D5.3a	6.82	4.38	5.45	2.45	1
C02D5.3	C02D5.3	C02D5.3b	9.1	6.04	8.32	3.06	1
C02D5.3	C02D5.3	C02D5.3c	5.11	2.66	5.46	2.45	1
C02E11.1	C02E11.1	C02E11.1a.1	8.62	7.85	1.71	0.77
C02E11.1	C02E11.1	C02E11.1a.2	8.91	8.16	1.69	0.75
C02E11.1	C02E11.1	C02E11.1b	8.91	8.16	1.69	0.75
C02E7.1	C02E7.1	C02E7.1	4.84	2.75	4.27	2.1	1
C02E7.10	C02E7.10	C02E7.10	4.2	1.74	5.49	2.46	1
str-211	C02E7.13	C02E7.13	3.15	1.53	3.09	1.63
srh-21	C02E7.2	C02E7.2	2.84	1.8	2.05	1.04
srh-20	C02E7.3	C02E7.3	3.49	1.93	2.95	1.56
srh-22	C02E7.4	C02E7.4	3.13	1.98	2.23	1.16
srh-23	C02E7.5	C02E7.5	3.59	2.09	2.83	1.5
C02E7.6	C02E7.6	C02E7.6	7.86	7.35	1.43	0.51
C02E7.7	C02E7.7	C02E7.7	5.91	4.13	3.45	1.79	1
C02E7.8	C02E7.8	C02E7.8	3.41	1.87	2.92	1.55
str-205	C02E7.9	C02E7.9	4.02	2.3	3.28	1.72	1
tsp-17	C02F12.1	C02F12.1	4.19	3.4	1.72	0.79
C02F12.3	C02F12.3	C02F12.3.1	6.93	5.13	3.48	1.8	1
C02F12.3	C02F12.3	C02F12.3.2	6.96	5.16	3.5	1.81	1
tag-52	C02F12.4	C02F12.4	7.25	6.18	2.1	1.07
C02F12.5	C02F12.5	C02F12.5	6.79	5.59	2.31	1.2
tag-278	C02F12.7	C02F12.7	6.81	4.96	3.6	1.85	1
C02F12.8	C02F12.8	C02F12.8	5.81	4.75	2.08	1.06
C02F12.9	C02F12.9	C02F12.9	3.39	2.96	1.34	0.42
ced-5	C02F4.1	C02F4.1	7.5	6.38	2.17	1.12
tax-6	C02F4.2	C02F4.2a	9.1	7.64	2.76	1.47
tax-6	C02F4.2	C02F4.2b	8.79	7.3	2.8	1.49
tax-6	C02F4.2	C02F4.2c	8.82	7.18	3.13	1.64
C02F4.3	C02F4.3	C02F4.3	3.04	4.35	0.4	-1.31		1
C02F4.4	C02F4.4	C02F4.4	5.33	4.1	2.36	1.24
C02F4.5	C02F4.5	C02F4.5	2.61	1.84	1.71	0.78
knl-1	C02F5.1	C02F5.1	9	8.45	1.47	0.56
C02F5.10	C02F5.10	C02F5.10	5.07	2.98	4.25	2.09	1
tsp-2	C02F5.11	C02F5.11	5.66	3.71	3.86	1.95	1
C02F5.12	C02F5.12	C02F5.12	6.2	4.42	3.44	1.78	1
C02F5.13	C02F5.13	C02F5.13	7.21	7.45	0.85	-0.23
C02F5.14	C02F5.14	C02F5.14	2.33	2.41	0.95	-0.08
C02F5.2	C02F5.2	C02F5.2	3.05	1.37	3.21	1.68
C02F5.3	C02F5.3	C02F5.3	8.71	8.06	1.57	0.65
C02F5.4	C02F5.4	C02F5.4	9.02	8.51	1.42	0.51
C02F5.5	C02F5.5	C02F5.5	2.41	2.45	0.97	-0.05
C02F5.6	C02F5.6	C02F5.6a	7.55	6.83	1.65	0.72
C02F5.6	C02F5.6	C02F5.6b	5.89	5.54	1.28	0.35
C02F5.7	C02F5.7	C02F5.7a.1	8.42	7.09	2.52	1.33
C02F5.7	C02F5.7	C02F5.7a.2	8.56	7.26	2.46	1.3
C02F5.7	C02F5.7	C02F5.7a.3	8.87	7.68	2.28	1.19
C02F5.7	C02F5.7	C02F5.7a.4	8.87	7.68	2.28	1.19
C02F5.7	C02F5.7	C02F5.7b.1	8.55	7.35	2.3	1.2
C02F5.7	C02F5.7	C02F5.7b.2	8.77	7.58	2.27	1.18
tsp-1	C02F5.8	C02F5.8	5.94	4.65	2.46	1.3
pbs-6	C02F5.9	C02F5.9.1	9.86	9.01	1.8	0.85
pbs-6	C02F5.9	C02F5.9.2	10.43	9.72	1.63	0.71
C02G6.1	C02G6.1	C02G6.1	4.66	3.4	2.4	1.27
C02G6.2	C02G6.2	C02G6.2	4.46	2.46	4	2	1
C02G6.3	C02G6.3	C02G6.3	4.27	3.14	2.19	1.13
C02H6.1	C02H6.1	C02H6.1	2.09	1.98	1.08	0.11
fbxa-105	C02H6.2	C02H6.2	5.31	3.03	4.84	2.27	1
C02H7.1	C02H7.1	C02H7.1	2.59	2.14	1.36	0.45
C02H7.2	C02H7.2	C02H7.2	3.05	1.92	2.19	1.13
aex-3	C02H7.3	C02H7.3a	6.22	4.37	3.61	1.85	1
aex-3	C02H7.3	C02H7.3b	6.31	4.29	4.06	2.02	1
C03A3.1	C03A3.1	C03A3.1a	5.23	3.48	3.36	1.75	1
C03A3.1	C03A3.1	C03A3.1b	5.89	3.65	4.74	2.25	1
C03A3.2	C03A3.2	C03A3.2.1	8.41	7.53	1.85	0.88
C03A3.2	C03A3.2	C03A3.2.2	8.43	7.54	1.85	0.89
C03A3.3	C03A3.3	C03A3.3	4.37	1.95	5.37	2.43	1
C03A7.1	C03A7.1	C03A7.1	6.19	4.19	3.98	1.99	1
srt-65	C03A7.10	C03A7.10	2.74	1.23	2.86	1.51
ugt-51	C03A7.11	C03A7.11	6	3.84	4.48	2.16	1
C03A7.12	C03A7.12	C03A7.12	6.16	4.42	3.32	1.73	1
C03A7.13	C03A7.13	C03A7.13	7.19	4.22	7.84	2.97	1
abu-8	C03A7.14	C03A7.14	6.85	3.62	9.35	3.23	1
C03A7.2	C03A7.2	C03A7.2	6.43	5.13	2.47	1.3
srw-140	C03A7.3	C03A7.3	2.74	1.6	2.21	1.14
pqn-5	C03A7.4	C03A7.4	5.8	4.34	2.75	1.46
srx-38	C03A7.5	C03A7.5	2.77	1.12	3.12	1.64
srx-39	C03A7.6	C03A7.6	2.69	2.33	1.29	0.36
abu-6	C03A7.7	C03A7.7	5.44	2.8	6.24	2.64	1
abu-7	C03A7.8	C03A7.8	7.07	4.43	6.21	2.63	1
srt-64	C03A7.9	C03A7.9	3.96	1.5	5.5	2.46	1
C03B1.1	C03B1.1	C03B1.1	3.55	1.35	4.59	2.2	1
C03B1.10	C03B1.10	C03B1.10	5.58	1	23.99	4.58	1
lmp-1	C03B1.12	C03B1.12.1	10.24	9.13	2.16	1.11
lmp-1	C03B1.12	C03B1.12.2	10.56	9.61	1.93	0.95
C03B1.13	C03B1.13	C03B1.13	5.16	4.28	1.84	0.88
C03B1.14	C03B1.14	C03B1.14	4.28	3.88	1.31	0.39
C03B1.15	C03B1.15	C03B1.15	4.68	2.57	4.32	2.11	1
C03B1.2	C03B1.2	C03B1.2	4.27	2.86	2.66	1.41
C03B1.3	C03B1.3	C03B1.3	1.52	1.01	1.43	0.51
C03B1.4	C03B1.4	C03B1.4	4.32	2.1	4.67	2.22	1
C03B1.5	C03B1.5	C03B1.5	3.26	2.35	1.88	0.91
C03B1.6	C03B1.6	C03B1.6	4.75	2.34	5.31	2.41	1
C03B1.7	C03B1.7	C03B1.7	5.67	4.31	2.57	1.36
C03B1.9	C03B1.9	C03B1.9	3.23	2.19	2.06	1.04
C03B8.1	C03B8.1	C03B8.1	3.71	3.73	0.98	-0.03
C03B8.2	C03B8.2	C03B8.2	7.05	4.75	4.95	2.31	1
C03B8.3	C03B8.3	C03B8.3	3.59	3.27	1.25	0.32
lin-13	C03B8.4	C03B8.4	8.77	7.88	1.86	0.89
kin-19	C03C10.1	C03C10.1.1	10.19	9.26	1.9	0.93
kin-19	C03C10.1	C03C10.1.2	10.16	9.24	1.89	0.92
kin-19	C03C10.1	C03C10.1.3	10.51	9.57	1.92	0.94
C03C10.2	C03C10.2	C03C10.2	3.14	2.05	2.12	1.09
rnr-2	C03C10.3	C03C10.3.1	10.35	10.04	1.24	0.31
rnr-2	C03C10.3	C03C10.3.2	8.56	8.35	1.15	0.21
rnr-2	C03C10.3	C03C10.3.3	10.82	10.43	1.31	0.39
C03C10.4	C03C10.4	C03C10.4	8.64	7.83	1.76	0.81
C03C10.5	C03C10.5	C03C10.5	4.99	2.1	7.46	2.9	1
C03C10.6	C03C10.6	C03C10.6	5.88	3.98	3.73	1.9	1
C03C10.7	C03C10.7	C03C10.7	3.81	3.42	1.31	0.39
C03C11.1	C03C11.1	C03C11.1	3.16	3.66	0.71	-0.5
fog-3	C03C11.2	C03C11.2	3.15	1.97	2.26	1.18
C03D6.1	C03D6.1	C03D6.1	4.89	2.85	4.12	2.04	1
cel-1	C03D6.3	C03D6.3a	7.63	6.57	2.09	1.07
cel-1	C03D6.3	C03D6.3b	8.11	7.22	1.85	0.88
npp-14	C03D6.4	C03D6.4	8.95	7.77	2.27	1.18
C03D6.5	C03D6.5	C03D6.5	7.97	7.2	1.72	0.78
C03D6.6	C03D6.6	C03D6.6	7.08	7.01	1.05	0.06
rpl-24.2	C03D6.8	C03D6.8.1	9.65	8.31	2.52	1.34
rpl-24.2	C03D6.8	C03D6.8.2	9.65	8.31	2.52	1.34
C03E10.1	C03E10.1	C03E10.1	3.29	1.64	3.13	1.65
C03E10.3	C03E10.3	C03E10.3	3.71	2.11	3.05	1.61
gly-20	C03E10.4	C03E10.4	9.01	8.56	1.37	0.45
C03E10.5	C03E10.5	C03E10.5	6.26	6.68	0.75	-0.42
C03E10.6	C03E10.6	C03E10.6	7.72	7.77	0.96	-0.05
C03F11.1	C03F11.1	C03F11.1	4.6	2.2	5.27	2.4	1
C03F11.2	C03F11.2	C03F11.2	2.59	2.33	1.2	0.26
C03F11.3	C03F11.3	C03F11.3	7.32	5.86	2.75	1.46
C03F11.4	C03F11.4	C03F11.4.1	4.67	2.14	5.77	2.53	1
C03F11.4	C03F11.4	C03F11.4.2	4.91	2.23	6.39	2.67	1
C03F11.4	C03F11.4	C03F11.4.3	4.91	2.23	6.39	2.67	1
sdha-1	C03G5.1	C03G5.1.1	7.78	6.56	2.32	1.21
sdha-1	C03G5.1	C03G5.1.2	8.89	7.5	2.62	1.39
nspc-3	C03G5.10	C03G5.10	9.73	9.49	1.19	0.25
nspc-4	C03G5.11	C03G5.11	5.2	4.94	1.19	0.26
nspc-5	C03G5.12	C03G5.12	9.96	9.63	1.26	0.33
nspc-6	C03G5.13	C03G5.13	5.64	5.37	1.21	0.27
nspc-7	C03G5.2	C03G5.2	8.53	8.52	1.01	0.02
flp-5	C03G5.7	C03G5.7	7.5	5.5	3.99	2	1
nspc-1	C03G5.8	C03G5.8	7.3	5.84	2.75	1.46
nspc-2	C03G5.9	C03G5.9	10.11	10.34	0.85	-0.24
nhr-148	C03G6.10	C03G6.10	3.82	2.32	2.83	1.5
srh-231	C03G6.11	C03G6.11	2.09	1.99	1.07	0.1
nhr-149	C03G6.12	C03G6.12	3.13	1.38	3.37	1.75	1
tag-293	C03G6.13	C03G6.13	2.67	2.21	1.38	0.47
cyp-35A1	C03G6.14	C03G6.14	4.4	1.77	6.21	2.64	1
cyp-35A2	C03G6.15	C03G6.15	9	5.57	10.79	3.43	1
srsx-24	C03G6.16	C03G6.16	2.91	1.57	2.53	1.34
C03G6.17	C03G6.17	C03G6.17	4.94	3.19	3.36	1.75	1
srp-5	C03G6.18	C03G6.18	7.17	6.15	2.03	1.02
srp-6	C03G6.19	C03G6.19	7.94	6.67	2.41	1.27
srx-56	C03G6.2	C03G6.2	3.79	1.39	5.27	2.4	1
srj-14	C03G6.3	C03G6.3	3.39	2.28	2.15	1.1
C03G6.5	C03G6.5	C03G6.5	9.04	6.88	4.45	2.15	1
C03G6.6	C03G6.6	C03G6.6	1.65	2.15	0.7	-0.5
srh-275	C03G6.7	C03G6.7	3.84	1.42	5.36	2.42	1
nhr-147	C03G6.8	C03G6.8	4.68	2.34	5.05	2.34	1
srh-244	C03G6.9	C03G6.9	2.5	2	1.41	0.5
C03H12.1	C03H12.1	C03H12.1	6.54	5.56	1.98	0.99
clec-10	C03H5.1	C03H5.1	6.44	4.85	3.01	1.59
C03H5.2	C03H5.2	C03H5.2	9.12	8.16	1.95	0.96
C03H5.3	C03H5.3	C03H5.3	7.95	7.55	1.31	0.39
C03H5.4	C03H5.4	C03H5.4	3.41	1.94	2.77	1.47
C03H5.5	C03H5.5	C03H5.5	4.01	3.46	1.46	0.55
C03H5.6	C03H5.6	C03H5.6	3.54	3.1	1.35	0.43
C03H5.7	C03H5.7	C03H5.7	2.44	2.03	1.33	0.41
C04A11.1	C04A11.1	C04A11.1	3.38	2.94	1.36	0.44
C04A11.2	C04A11.2	C04A11.2	4.9	4.35	1.46	0.55
gck-4	C04A11.3	C04A11.3	8.45	7.56	1.84	0.88
adm-2	C04A11.4	C04A11.4	6.62	5.53	2.13	1.09
C04A11.5	C04A11.5	C04A11.5	5.2	2.87	5.02	2.33	1
C04A2.1	C04A2.1	C04A2.1.1	5.64	3.99	3.13	1.64
C04A2.1	C04A2.1	C04A2.1.2	5.86	4.04	3.52	1.82	1
egl-27	C04A2.3	C04A2.3a	8.45	7.27	2.27	1.18
egl-27	C04A2.3	C04A2.3b	8.63	7.47	2.24	1.17
egl-27	C04A2.3	C04A2.3c.1	10.52	9.75	1.71	0.77
egl-27	C04A2.3	C04A2.3c.2	10.79	10.03	1.69	0.76
egl-27	C04A2.3	C04A2.3c.3	10.79	10.03	1.69	0.76
dnj-5	C04A2.7	C04A2.7a	9.41	8.52	1.85	0.89
dnj-5	C04A2.7	C04A2.7b.1	9.35	8.43	1.89	0.92
dnj-5	C04A2.7	C04A2.7b.2	9.24	8.35	1.85	0.89
dnj-5	C04A2.7	C04A2.7c	9.41	8.52	1.85	0.89
dnj-5	C04A2.7	C04A2.7d	9.51	8.57	1.91	0.93
C04B4.1	C04B4.1	C04B4.1	2.06	1.6	1.37	0.46
C04B4.2	C04B4.2	C04B4.2	8.05	7.72	1.26	0.33
C04B4.3	C04B4.3	C04B4.3	3.38	2.01	2.58	1.37
C04B4.4	C04B4.4	C04B4.4	2.08	1.56	1.43	0.51
C04B4.5	C04B4.5	C04B4.5	3.08	1.96	2.18	1.12
C04B4.6	C04B4.6	C04B4.6	1.64	1.11	1.44	0.53
C04C11.1	C04C11.1	C04C11.1b	7.59	6.42	2.25	1.17
C04C11.2	C04C11.2	C04C11.2.1	9.01	7.45	2.94	1.55
C04C11.2	C04C11.2	C04C11.2.2	9.25	7.74	2.83	1.5
srz-60	C04C3.1	C04C3.1	2.68	2.45	1.17	0.23
C04C3.2	C04C3.2	C04C3.2	3.22	2.34	1.84	0.88
C04C3.3	C04C3.3	C04C3.3.1	9.81	9.21	1.51	0.59
C04C3.3	C04C3.3	C04C3.3.2	9.78	9.21	1.48	0.57
C04C3.4	C04C3.4	C04C3.4	7.8	5.49	4.94	2.3	1
dyf-3	C04C3.5	C04C3.5a	2.35	2.87	0.69	-0.53
dyf-3	C04C3.5	C04C3.5b	2.71	2.48	1.17	0.22
dyf-3	C04C3.5	C04C3.5c	2.41	2.78	0.77	-0.38
C04C3.6	C04C3.6	C04C3.6	2.07	2.78	0.61	-0.71
C04C3.7	C04C3.7	C04C3.7	3.23	2.32	1.87	0.9
C04D8.1	C04D8.1	C04D8.1	8.61	7.64	1.96	0.97
C04E12.10	C04E12.10	C04E12.10	3.5	1.76	3.33	1.74	1
C04E12.11	C04E12.11	C04E12.11	6.45	4.05	5.26	2.4	1
C04E12.12	C04E12.12	C04E12.12	4.84	3.74	2.16	1.11
C04E12.2	C04E12.2	C04E12.2.1	6.23	4.27	3.89	1.96	1
C04E12.2	C04E12.2	C04E12.2.2	6.85	5.06	3.47	1.8	1
C04E12.4	C04E12.4	C04E12.4	5.88	3.65	4.71	2.24	1
C04E12.5	C04E12.5	C04E12.5	2.95	2.08	1.82	0.86
C04E12.6	C04E12.6	C04E12.6	2.86	3.42	0.68	-0.56
plsc-1	C04E12.7	C04E12.7	3.92	2.53	2.62	1.39
srx-121	C04E12.8	C04E12.8	3.5	2.17	2.51	1.33
srbc-2	C04E12.9	C04E12.9	3.86	2.29	2.98	1.57
srd-15	C04E6.10	C04E6.10	2.22	2.19	1.02	0.02
C04E6.11	C04E6.11	C04E6.11	6.63	6.51	1.08	0.12
C04E6.12	C04E6.12	C04E6.12	4.31	1.66	6.29	2.65	1
C04E6.13	C04E6.13	C04E6.13	5.97	3.67	4.9	2.29	1
srsx-18	C04E6.2	C04E6.2	2.57	2.2	1.3	0.38
C04E6.3	C04E6.3	C04E6.3	4.13	2.05	4.22	2.08	1
C04E6.4	C04E6.4	C04E6.4	3.33	1.48	3.62	1.85	1
C04E6.5	C04E6.5	C04E6.5	3.18	1.72	2.75	1.46
grd-9	C04E6.6	C04E6.6	3.1	1.88	2.32	1.21
C04E6.7	C04E6.7	C04E6.7	5.61	4.12	2.8	1.49
C04E6.8	C04E6.8	C04E6.8	3.33	2.41	1.9	0.93
srd-16	C04E6.9	C04E6.9	2.42	1.43	1.99	0.99
C04E7.1	C04E7.1	C04E7.1	4.52	3.24	2.43	1.28
C04E7.2	C04E7.2	C04E7.2	6.88	6.05	1.78	0.83
C04E7.3	C04E7.3	C04E7.3	7.58	6.13	2.72	1.44
C04E7.4	C04E7.4	C04E7.4	5.21	3.18	4.08	2.03	1
C04F1.1	C04F1.1	C04F1.1	3.07	2.68	1.31	0.39
lim-7	C04F1.3	C04F1.3	5.59	4.8	1.74	0.8
C04F12.1	C04F12.1	C04F12.1	6.99	5.86	2.19	1.13
fce-1	C04F12.10	C04F12.10	8.28	7.2	2.12	1.08
ikb-1	C04F12.3	C04F12.3	5.58	4.96	1.54	0.62
rpl-14	C04F12.4	C04F12.4.1	11.38	10.79	1.5	0.59
rpl-14	C04F12.4	C04F12.4.2	11.38	10.79	1.5	0.59
C04F12.5	C04F12.5	C04F12.5	7.86	6.55	2.48	1.31
C04F12.6	C04F12.6	C04F12.6	3.28	2.67	1.53	0.61
C04F12.7	C04F12.7	C04F12.7	5.69	3.74	3.85	1.94	1
C04F12.8	C04F12.8	C04F12.8	6.85	4.5	5.09	2.35	1
rnh-1.3	C04F12.9	C04F12.9	3.88	4.64	0.59	-0.76
srh-79	C04F2.1	C04F2.1	3.92	1.72	4.6	2.2	1
srh-229	C04F2.4	C04F2.4	3.44	1.65	3.44	1.78	1
sid-1	C04F5.1	C04F5.1	7.68	6.87	1.75	0.81
C04F5.2	C04F5.2	C04F5.2	3.36	2.73	1.55	0.63
unc-46	C04F5.3	C04F5.3	3.2	2.84	1.28	0.36
srab-1	C04F5.4	C04F5.4	3.68	2.26	2.69	1.42
srab-2	C04F5.5	C04F5.5	3.09	1.55	2.91	1.54
srab-3	C04F5.6	C04F5.6	3.12	1.65	2.77	1.47
ugt-63	C04F5.7	C04F5.7	2.17	3.26	0.47	-1.09		1
C04F5.8	C04F5.8	C04F5.8	8.62	7.84	1.72	0.78
C04F5.9	C04F5.9	C04F5.9	6.74	6.06	1.6	0.68
vit-5	C04F6.1	C04F6.1.1	13.73	13.56	1.12	0.17
vit-5	C04F6.1	C04F6.1.2	13.83	13.71	1.08	0.12
vit-5	C04F6.1	C04F6.1.3	13.83	13.71	1.08	0.12
C04F6.2	C04F6.2	C04F6.2	3.03	3.85	0.57	-0.82		1
cht-1	C04F6.3	C04F6.3.1	6.97	7.36	0.77	-0.38
cht-1	C04F6.3	C04F6.3.2	7.55	7.88	0.79	-0.33
unc-78	C04F6.4	C04F6.4a	7.91	6.49	2.67	1.42
unc-78	C04F6.4	C04F6.4b.1	7.49	6.49	2	1
unc-78	C04F6.4	C04F6.4b.2	7.87	6.28	3.02	1.59
dhs-27	C04F6.5	C04F6.5	4.5	3.78	1.65	0.72
C04G2.1	C04G2.1	C04G2.1	5.57	4.38	2.28	1.19
C04G2.10	C04G2.10	C04G2.10	5.9	5.55	1.27	0.35
C04G2.11	C04G2.11	C04G2.11	2.43	1.36	2.1	1.07
C04G2.2	C04G2.2	C04G2.2	3.29	2.12	2.24	1.17
msp-36	C04G2.4	C04G2.4	9.09	7.31	3.43	1.78	1
C04G2.5	C04G2.5	C04G2.5	2.75	1.36	2.63	1.39
dis-3	C04G2.6	C04G2.6	8.2	7.23	1.96	0.97
egl-38	C04G2.7	C04G2.7	3.72	2.98	1.67	0.74
C04G2.8	C04G2.8	C04G2.8	3.62	3.68	0.96	-0.06
C04G2.9	C04G2.9	C04G2.9	4.96	3.47	2.81	1.49
C04G6.10	C04G6.10	C04G6.10	3.64	1.41	4.66	2.22	1
C04G6.11	C04G6.11	C04G6.11	2.33	1.72	1.52	0.61
mpk-2	C04G6.1	C04G6.1a	5.55	3.53	4.06	2.02	1
mpk-2	C04G6.1	C04G6.1b	5.96	3.53	5.38	2.43	1
mpk-2	C04G6.1	C04G6.1c.1	5.63	3.53	4.28	2.1	1
mpk-2	C04G6.1	C04G6.1c.2	5.71	3.83	3.69	1.89	1
C04G6.2	C04G6.2	C04G6.2	3.73	2.18	2.94	1.56
pld-1	C04G6.3	C04G6.3.1	8.03	6.57	2.76	1.46
pld-1	C04G6.3	C04G6.3.2	8.07	6.59	2.8	1.48
C04G6.4	C04G6.4	C04G6.4	7.68	6.17	2.85	1.51
C04G6.5	C04G6.5	C04G6.5	6.67	4.81	3.62	1.86	1
C04G6.6	C04G6.6	C04G6.6	6.29	2.63	12.66	3.66	1
C04G6.7	C04G6.7	C04G6.7	3.81	2.16	3.12	1.64
C04H4.1	C04H4.1	C04H4.1	4.6	3.11	2.81	1.49
C04H5.1	C04H5.1	C04H5.1	8.44	7.44	2.01	1
C04H5.2	C04H5.2	C04H5.2	7.02	5.85	2.25	1.17
gcy-29	C04H5.3	C04H5.3	3.05	1.79	2.4	1.26
mog-4	C04H5.6	C04H5.6	7.13	6.39	1.68	0.75
C04H5.7	C04H5.7	C04H5.7	6.8	6.99	0.87	-0.19
nlp-41	C04H5.8	C04H5.8	5.43	2.99	5.42	2.44	1
pph-1	C05A2.1	C05A2.1	7.7	6.21	2.81	1.49
pgp-5	C05A9.1	C05A9.1	5.51	4.1	2.67	1.42
C05A9.2	C05A9.2	C05A9.2	6.53	5.39	2.21	1.14
C05A9.3	C05A9.3	C05A9.3	2.93	2.23	1.63	0.7
lip-1	C05B10.1	C05B10.1	8.55	7.49	2.08	1.06
C05B5.1	C05B5.1	C05B5.1	4.11	2.05	4.15	2.05	1
C05B5.2	C05B5.2	C05B5.2	4.27	2.25	4.07	2.02	1
pqn-8	C05B5.3	C05B5.3	5.21	1.7	11.36	3.51	1
C05B5.4	C05B5.4	C05B5.4	6.93	5.48	2.74	1.45
C05B5.5	C05B5.5	C05B5.5	3.45	1.83	3.07	1.62
C05B5.6	C05B5.6	C05B5.6	2.5	1.71	1.73	0.79
rgs-1	C05B5.7	C05B5.7	5.19	2.17	8.09	3.02	1
C05B5.8	C05B5.8	C05B5.8	6.08	5.26	1.76	0.82
C05B5.9	C05B5.9	C05B5.9	5.96	3.23	6.62	2.73	1
C05C10.1	C05C10.1	C05C10.1	3.06	1.71	2.56	1.36
C05C10.2	C05C10.2	C05C10.2a	7.02	6.36	1.58	0.66
C05C10.2	C05C10.2	C05C10.2b.1	7.08	6.45	1.55	0.63
C05C10.2	C05C10.2	C05C10.2b.2	6.92	5.86	2.09	1.06
C05C10.3	C05C10.3	C05C10.3.1	8.57	7.65	1.89	0.92
C05C10.3	C05C10.3	C05C10.3.2	8.35	7.69	1.58	0.66
C05C10.3	C05C10.3	C05C10.3.3	8.68	7.94	1.68	0.75
C05C10.4	C05C10.4	C05C10.4	8.66	7.47	2.27	1.18
C05C10.5	C05C10.5	C05C10.5a	9.89	9.47	1.34	0.42
C05C10.5	C05C10.5	C05C10.5b	10.3	10	1.23	0.3
C05C10.5	C05C10.5	C05C10.5c.1	10.3	10	1.23	0.3
C05C10.5	C05C10.5	C05C10.5c.2	10.3	10	1.23	0.3
C05C10.5	C05C10.5	C05C10.5c.3	10.7	10.53	1.13	0.18
ufd-3	C05C10.6	C05C10.6a	9.55	8.93	1.54	0.63
ufd-3	C05C10.6	C05C10.6b	9.67	8.99	1.61	0.69
C05C10.7	C05C10.7	C05C10.7	6.77	5.35	2.67	1.42
C05C12.1	C05C12.1	C05C12.1	4.14	3.01	2.18	1.12
gtl-1	C05C12.3	C05C12.3	7.62	5.67	3.87	1.95	1
C05C12.4	C05C12.4	C05C12.4	7.07	5.36	3.28	1.72	1
C05C12.5	C05C12.5	C05C12.5	2.57	1.3	2.4	1.27
C05C12.6	C05C12.6	C05C12.6	4.02	2.51	2.85	1.51
C05C8.1	C05C8.1	C05C8.1	7.64	6.91	1.65	0.72
C05C8.2	C05C8.2	C05C8.2	8.42	7.95	1.39	0.47
fkb-3	C05C8.3	C05C8.3	8.34	7.86	1.39	0.48
gei-6	C05C8.4	C05C8.4	7.88	6.99	1.85	0.89
C05C8.5	C05C8.5	C05C8.5	8.17	7.56	1.52	0.61
C05C8.6	C05C8.6	C05C8.6	8.98	8.55	1.34	0.42
C05C8.7	C05C8.7	C05C8.7.1	7.22	6.22	2	1
C05C8.7	C05C8.7	C05C8.7.2	8.01	6.94	2.1	1.07
C05C8.7	C05C8.7	C05C8.7.3	7.45	6.56	1.85	0.89
C05C8.7	C05C8.7	C05C8.7.4	7.74	6.76	1.96	0.97
C05C8.8	C05C8.8	C05C8.8	2.88	1.68	2.29	1.19
C05C8.9	C05C8.9	C05C8.9a	7.48	7.14	1.27	0.34
C05C8.9	C05C8.9	C05C8.9b.1	8.34	7.63	1.64	0.71
C05C8.9	C05C8.9	C05C8.9b.2	8.54	7.85	1.61	0.69
C05C9.1	C05C9.1	C05C9.1	3.25	2.44	1.76	0.82
C05C9.2	C05C9.2	C05C9.2	2.65	1.55	2.14	1.1
C05C9.3	C05C9.3	C05C9.3	3.63	2.26	2.58	1.37
C05D10.1	C05D10.1	C05D10.1a.1	8.84	7.67	2.25	1.17
C05D10.1	C05D10.1	C05D10.1a.2	9.22	8.02	2.3	1.2
C05D10.1	C05D10.1	C05D10.1b	9.29	8.1	2.28	1.19
C05D10.1	C05D10.1	C05D10.1c.1	9.61	8.57	2.05	1.04
C05D10.1	C05D10.1	C05D10.1c.2	9.33	8.15	2.27	1.18
C05D10.1	C05D10.1	C05D10.1c.3	9.22	8.02	2.3	1.2
C05D10.1	C05D10.1	C05D10.1c.4	9.61	8.57	2.05	1.04
C05D10.2	C05D10.2	C05D10.2a	4.66	3.31	2.55	1.35
C05D10.2	C05D10.2	C05D10.2b	5.03	3.42	3.05	1.61
C05D10.2	C05D10.2	C05D10.2c	4.66	3.31	2.55	1.35
C05D10.3	C05D10.3	C05D10.3	4.74	3.76	1.98	0.98
C05D10.4	C05D10.4	C05D10.4a	6.03	4.95	2.11	1.08
C05D10.4	C05D10.4	C05D10.4b	5.4	4.58	1.77	0.82
C05D10.4	C05D10.4	C05D10.4c	6.69	5.53	2.22	1.15
C05D11.1	C05D11.1	C05D11.1	9.49	8.82	1.6	0.67
C05D11.10	C05D11.10	C05D11.10	6.43	5.32	2.17	1.11
mel-32	C05D11.11	C05D11.11a.1	11.07	10.03	2.07	1.05
mel-32	C05D11.11	C05D11.11a.2	11.07	10.03	2.07	1.05
mel-32	C05D11.11	C05D11.11a.3	10.32	9.33	1.98	0.99
mel-32	C05D11.11	C05D11.11b.1	9.25	8	2.37	1.25
mel-32	C05D11.11	C05D11.11b.2	9.98	9.01	1.96	0.97
mel-32	C05D11.11	C05D11.11b.3	10.32	9.33	1.98	0.99
let-721	C05D11.12	C05D11.12.1	8.55	7.85	1.62	0.69
let-721	C05D11.12	C05D11.12.2	9.1	8.37	1.65	0.72
C05D11.13	C05D11.13	C05D11.13	6.65	5.35	2.46	1.3
vps-16	C05D11.2	C05D11.2.1	8.26	7.39	1.83	0.87
vps-16	C05D11.2	C05D11.2.2	8.38	7.55	1.78	0.83
tag-170	C05D11.3	C05D11.3	8.92	8.24	1.6	0.68
let-756	C05D11.4	C05D11.4	6.66	4.72	3.84	1.94	1
C05D11.5	C05D11.5	C05D11.5	5.66	3.7	3.89	1.96	1
nas-4	C05D11.6	C05D11.6	3.45	2.52	1.89	0.92
C05D11.7	C05D11.7	C05D11.7a.1	8.57	7.73	1.79	0.84
C05D11.7	C05D11.7	C05D11.7a.2	9.11	8.19	1.89	0.92
C05D11.7	C05D11.7	C05D11.7b	9.12	8.23	1.86	0.89
C05D11.8	C05D11.8	C05D11.8	7.71	6.86	1.8	0.84
C05D11.9	C05D11.9	C05D11.9	7.53	6.24	2.43	1.28
C05D12.1	C05D12.1	C05D12.1	4.63	2.89	3.33	1.74	1
C05D12.2	C05D12.2	C05D12.2	4.99	4.58	1.33	0.41
C05D12.3	C05D12.3	C05D12.3a.1	6.51	4.37	4.4	2.14	1
C05D12.3	C05D12.3	C05D12.3a.2	6.58	4.52	4.18	2.06	1
C05D12.3	C05D12.3	C05D12.3c	6.66	4.67	3.98	1.99	1
C05D12.4	C05D12.4	C05D12.4	5.88	4.55	2.51	1.33
C05D12.5	C05D12.5	C05D12.5	4.3	4.21	1.06	0.08
C05D12.7	C05D12.7	C05D12.7	5.71	5.34	1.3	0.37
C05D2.10	C05D2.10	C05D2.10a.1	9.58	8.81	1.71	0.77
C05D2.10	C05D2.10	C05D2.10a.2	9.77	9.02	1.68	0.75
C05D2.10	C05D2.10	C05D2.10b	9.77	9.01	1.69	0.76
daf-4	C05D2.1	C05D2.1a	7.3	6.63	1.59	0.67
daf-4	C05D2.1	C05D2.1c	7.1	6.46	1.56	0.64
daf-4	C05D2.1	C05D2.1d	7.22	6.75	1.38	0.47
C05D2.3	C05D2.3	C05D2.3	3.66	2.51	2.22	1.15
bas-1	C05D2.4	C05D2.4a	7.08	5.84	2.37	1.25
bas-1	C05D2.4	C05D2.4b	6.91	5.47	2.7	1.43
gak-1	C05D2.5	C05D2.5	8.96	8.43	1.45	0.54
C05D2.6	C05D2.6	C05D2.6a.1	7.43	6.29	2.21	1.14
C05D2.6	C05D2.6	C05D2.6a.2	7.22	6.39	1.77	0.82
C05D2.6	C05D2.6	C05D2.6b	7.77	6.67	2.15	1.1
C05D2.8	C05D2.8	C05D2.8	8.76	7.54	2.33	1.22
snx-1	C05D9.1	C05D9.1.1	9.18	8.52	1.59	0.67
snx-1	C05D9.1	C05D9.1.2	8.6	7.49	2.16	1.11
lmp-2	C05D9.2	C05D9.2.1	6.52	4.73	3.46	1.79	1
lmp-2	C05D9.2	C05D9.2.2	5.92	4.51	2.67	1.41
C05D9.3	C05D9.3	C05D9.3	7	5	4.01	2	1
C05D9.4	C05D9.4	C05D9.4	3.96	1.06	7.45	2.9	1
ife-4	C05D9.5	C05D9.5	5.74	6.72	0.51	-0.98		1
C05D9.7	C05D9.7	C05D9.7	5.61	4.57	2.06	1.04
C05D9.9	C05D9.9	C05D9.9a	5.73	3.86	3.64	1.86	1
C05D9.9	C05D9.9	C05D9.9b	6.5	4.73	3.41	1.77	1
C05E11.1	C05E11.1	C05E11.1	7.84	7.41	1.35	0.43
C05E11.2	C05E11.2	C05E11.2	4.2	2.53	3.18	1.67
C05E11.3	C05E11.3	C05E11.3	6.14	4.54	3.04	1.6
amt-1	C05E11.4	C05E11.4	4.75	3.12	3.09	1.63
amt-4	C05E11.5	C05E11.5	6.7	5.27	2.7	1.43
C05E11.6	C05E11.6	C05E11.6	4.29	5.5	0.43	-1.21		1
C05E11.7	C05E11.7	C05E11.7	3.43	2.24	2.28	1.19
flp-12	C05E11.8	C05E11.8	7.87	6.41	2.73	1.45
srp-2	C05E4.1	C05E4.1.1	5.3	5.55	0.84	-0.26
srp-2	C05E4.1	C05E4.1.2	6.18	6.48	0.81	-0.3
srj-25	C05E4.10	C05E4.10	3.13	1.87	2.4	1.26
srj-24	C05E4.11	C05E4.11	3.17	2	2.25	1.17
C05E4.12	C05E4.12	C05E4.12	3.06	2.18	1.83	0.87
str-262	C05E4.13	C05E4.13	2.48	2.85	0.77	-0.37
srh-2	C05E4.14	C05E4.14a	4.33	3.74	1.5	0.59
srh-2	C05E4.14	C05E4.14b	5.63	4.95	1.6	0.68
str-20	C05E4.2	C05E4.2	2.99	1.74	2.39	1.26
srp-1	C05E4.3	C05E4.3	7.09	6.72	1.29	0.37
sri-4	C05E4.4	C05E4.4	2.91	1.56	2.54	1.34
str-134	C05E4.6	C05E4.6	4.09	1.51	5.98	2.58	1
C05E4.7	C05E4.7	C05E4.7	1.74	1	1.67	0.74
gei-7	C05E4.9	C05E4.9a.1	11.42	10.72	1.63	0.71
gei-7	C05E4.9	C05E4.9a.2	10.55	9.46	2.13	1.09
gei-7	C05E4.9	C05E4.9a.3	11.16	10.71	1.36	0.44
gei-7	C05E4.9	C05E4.9b.1	10.19	9.97	1.16	0.21
gei-7	C05E4.9	C05E4.9b.2	10.22	9.64	1.49	0.58
C05E7.1	C05E7.1	C05E7.1	5.08	2.68	5.29	2.4	1
C05E7.2	C05E7.2	C05E7.2	2.84	1.52	2.48	1.31
C05E7.3	C05E7.3	C05E7.3	5.5	1.92	12.02	3.59	1
C05E7.4	C05E7.4	C05E7.4	3.26	2.26	2	1
C05G5.1	C05G5.1	C05G5.1	4.75	3.81	1.92	0.94
C05G5.2	C05G5.2	C05G5.2	7.54	7.08	1.38	0.46
C05G5.3	C05G5.3	C05G5.3	4.36	3.09	2.41	1.27
C05G5.4	C05G5.4	C05G5.4	8.86	7.98	1.83	0.87
C05G5.5	C05G5.5	C05G5.5	5.05	4.04	2.02	1.01
nhr-76	C05G6.1	C05G6.1	7.17	6.23	1.92	0.94
ckk-1	C05H8.1	C05H8.1a	6.02	3.83	4.56	2.19	1
ckk-1	C05H8.1	C05H8.1b	6.06	3.75	4.99	2.32	1
cdc-48.1	C06A1.1	C06A1.1.1	10.36	9.55	1.75	0.81
cdc-48.1	C06A1.1	C06A1.1.2	10.41	9.61	1.73	0.79
C06A1.2	C06A1.2	C06A1.2	4.06	3.46	1.52	0.61
C06A1.3	C06A1.3	C06A1.3	4.28	3.55	1.67	0.74
C06A1.5	C06A1.5	C06A1.5	9.89	9.63	1.2	0.26
C06A1.6	C06A1.6	C06A1.6	2.95	2.63	1.24	0.31
C06A1.7	C06A1.7	C06A1.7	3.82	2.55	2.42	1.28
C06A12.3	C06A12.3	C06A12.3	5.92	5.98	0.96	-0.06
gcy-27	C06A12.4	C06A12.4	3.11	1.85	2.4	1.26
C06A12.5	C06A12.5	C06A12.5	5.04	2.11	7.61	2.93	1
C06A12.8	C06A12.8	C06A12.8	4.81	2.11	6.5	2.7	1
C06A5.1	C06A5.1	C06A5.1	7.93	7.33	1.51	0.6
C06A5.10	C06A5.10	C06A5.10	2.81	1.98	1.78	0.83
sir-2.4	C06A5.11	C06A5.11	6.66	5.52	2.2	1.14
C06A5.12	C06A5.12	C06A5.12	5.64	4.74	1.87	0.9
C06A5.2	C06A5.2	C06A5.2	5.2	2.95	4.77	2.25	1
C06A5.3	C06A5.3	C06A5.3a	8.77	7.99	1.72	0.79
C06A5.3	C06A5.3	C06A5.3b	8.87	8.08	1.74	0.8
C06A5.4	C06A5.4	C06A5.4	0	0	1	0
C06A5.5	C06A5.5	C06A5.5	0	0	1	0
C06A5.6	C06A5.6	C06A5.6	8.22	7.88	1.27	0.34
tmd-1	C06A5.7	C06A5.7a	7.31	6.19	2.18	1.13
tmd-1	C06A5.7	C06A5.7b	7.34	5.9	2.71	1.44
C06A5.8	C06A5.8	C06A5.8a	7.38	6.47	1.88	0.91
C06A5.8	C06A5.8	C06A5.8b	7.36	7	1.28	0.36
rnf-1	C06A5.9	C06A5.9	7.16	5.96	2.3	1.2
C06A6.2	C06A6.2	C06A6.2a	6.21	5.6	1.53	0.61
C06A6.2	C06A6.2	C06A6.2b	6.21	5.6	1.53	0.61
C06A6.3	C06A6.3	C06A6.3	8.56	7.77	1.73	0.79
C06A6.4	C06A6.4	C06A6.4a.1	8.31	7.07	2.35	1.23
C06A6.4	C06A6.4	C06A6.4a.2	8.31	7.07	2.35	1.23
C06A6.4	C06A6.4	C06A6.4b	8.13	6.88	2.37	1.25
C06A6.5	C06A6.5	C06A6.5	7.08	5.86	2.32	1.22
C06A6.7	C06A6.7	C06A6.7	4.54	2.68	3.62	1.86	1
C06A8.1	C06A8.1	C06A8.1a.1	9.98	8.28	3.25	1.7
C06A8.1	C06A8.1	C06A8.1a.2	10.26	8.61	3.14	1.65
C06A8.1	C06A8.1	C06A8.1b	9.79	8.17	3.07	1.62
C06A8.2	C06A8.2	C06A8.2	8.52	7.61	1.87	0.91
C06A8.3	C06A8.3	C06A8.3.1	8.91	8.39	1.44	0.53
C06A8.3	C06A8.3	C06A8.3.2	10.74	10.34	1.32	0.4
skr-17	C06A8.4	C06A8.4	8.12	7.59	1.44	0.52
C06A8.5	C06A8.5	C06A8.5	8.31	7.7	1.53	0.61
C06A8.6	C06A8.6	C06A8.6	3.2	1.63	2.97	1.57
srh-39	C06A8.7	C06A8.7	2.35	1.54	1.74	0.8
C06A8.8	C06A8.8	C06A8.8a	3.39	2.95	1.35	0.43
C06A8.8	C06A8.8	C06A8.8b.1	6.09	3.9	4.59	2.2	1
C06A8.8	C06A8.8	C06A8.8b.2	4.82	3.17	3.14	1.65
glr-4	C06A8.9	C06A8.9	4.31	2.48	3.55	1.83	1
C06B3.1	C06B3.1	C06B3.1	2.71	1.23	2.79	1.48
str-250	C06B3.10	C06B3.10	4.11	1.96	4.45	2.15	1
srx-42	C06B3.11	C06B3.11	3.11	1.79	2.5	1.32
srxa-11	C06B3.12	C06B3.12	3.13	1.96	2.25	1.17
srxa-12	C06B3.13	C06B3.13	3.75	1.87	3.67	1.88	1
srxa-13	C06B3.14	C06B3.14	3.01	1.97	2.06	1.04
C06B3.2	C06B3.2	C06B3.2	4.29	2.7	3.01	1.59
cyp-35C1	C06B3.3	C06B3.3	7.33	4.28	8.32	3.06	1
stdh-1	C06B3.4	C06B3.4	8.41	7.52	1.86	0.89
C06B3.5	C06B3.5	C06B3.5	3.73	2.57	2.25	1.17
C06B3.6	C06B3.6	C06B3.6.1	8.32	7.07	2.37	1.24
C06B3.6	C06B3.6	C06B3.6.2	9.22	8.15	2.1	1.07
C06B3.6	C06B3.6	C06B3.6.3	9.22	8.15	2.1	1.07
C06B3.7	C06B3.7	C06B3.7	4.01	2.82	2.28	1.19
gcy-32	C06B3.8	C06B3.8.1	3.51	2.45	2.09	1.06
gcy-32	C06B3.8	C06B3.8.2	3.73	2.56	2.25	1.17
str-252	C06B3.9	C06B3.9	3.14	1.5	3.12	1.64
nhr-150	C06B8.1	C06B8.1	4.2	2.21	3.98	1.99	1
srh-218	C06B8.10	C06B8.10	2.68	1.36	2.49	1.32
C06B8.11	C06B8.11	C06B8.11	5.77	2.3	11.11	3.47	1
C06B8.2	C06B8.2	C06B8.2a	5.27	3.06	4.64	2.21	1
C06B8.2	C06B8.2	C06B8.2b	5.03	2.93	4.29	2.1	1
nhr-151	C06B8.3	C06B8.3	3.47	2.03	2.7	1.44
str-264	C06B8.4	C06B8.4	2.51	2.32	1.14	0.19
srh-219	C06B8.6	C06B8.6	3.49	1.26	4.71	2.24	1
C06B8.7	C06B8.7	C06B8.7	7.34	5.9	2.71	1.44
rpl-38	C06B8.8	C06B8.8.1	12.85	11.99	1.81	0.85
rpl-38	C06B8.8	C06B8.8.2	12.61	11.57	2.06	1.04
rpl-38	C06B8.8	C06B8.8.3	12.9	12.08	1.75	0.81
srw-21	C06B8.9	C06B8.9	2.79	2.45	1.27	0.34
mel-11	C06C3.1	C06C3.1a	9.33	8.36	1.96	0.97
mel-11	C06C3.1	C06C3.1b	9.33	8.36	1.96	0.97
mel-11	C06C3.1	C06C3.1c	8.98	7.97	2	1
mel-11	C06C3.1	C06C3.1d	9.38	8.39	1.98	0.99
C06C3.3	C06C3.3	C06C3.3	3.68	1.52	4.45	2.15	1
C06C3.4	C06C3.4	C06C3.4	4.03	2.73	2.45	1.29
srh-48	C06C3.6	C06C3.6	4.15	1.93	4.64	2.22	1
C06C3.7	C06C3.7	C06C3.7	4.83	3.79	2.05	1.03
C06C3.8	C06C3.8	C06C3.8	3.77	2.29	2.79	1.48
C06C6.1	C06C6.1	C06C6.1	2.94	1.59	2.54	1.34
str-233	C06C6.2	C06C6.2	3.37	1.57	3.48	1.8	1
str-231	C06C6.3	C06C6.3	3.8	1.36	5.43	2.44	1
nhr-63	C06C6.4	C06C6.4	5.36	4.15	2.32	1.21
nhr-50	C06C6.5	C06C6.5a	4.74	3.79	1.92	0.94
nhr-50	C06C6.5	C06C6.5b.1	4.04	3.78	1.2	0.26
nhr-50	C06C6.5	C06C6.5b.2	4.56	3.41	2.22	1.15
C06C6.6	C06C6.6	C06C6.6	3.21	2.38	1.78	0.83
C06C6.7	C06C6.7	C06C6.7	3.16	1.34	3.54	1.82	1
C06C6.8	C06C6.8	C06C6.8	2.07	1.95	1.09	0.12
C06C6.9	C06C6.9	C06C6.9	3.59	2.21	2.6	1.38
C06E1.1	C06E1.1	C06E1.1	6.7	6.47	1.17	0.23
rha-2	C06E1.10	C06E1.10	7.35	6.18	2.24	1.16
C06E1.11	C06E1.11	C06E1.11	4.69	4.06	1.55	0.63
C06E1.3	C06E1.3	C06E1.3	5.22	3.64	3.01	1.59
glr-1	C06E1.4	C06E1.4	3.38	2.2	2.27	1.18
C06E1.5	C06E1.5	C06E1.5	1	1.75	0.59	-0.75
C06E1.6	C06E1.6	C06E1.6	4.99	3.22	3.41	1.77	1
C06E1.7	C06E1.7	C06E1.7	2.98	1.85	2.19	1.13
C06E1.8	C06E1.8	C06E1.8	3.92	1.66	4.8	2.26	1
C06E1.9	C06E1.9	C06E1.9	8.09	7.06	2.04	1.03
C06E2.1	C06E2.1	C06E2.1	3.56	1.95	3.06	1.62
C06E2.2	C06E2.2	C06E2.2	2.91	1.57	2.54	1.35
ubc-21	C06E2.3	C06E2.3	2.32	2.82	0.71	-0.5
C06E2.5	C06E2.5	C06E2.5.1	5.73	5.56	1.13	0.17
C06E2.5	C06E2.5	C06E2.5.2	5.33	5.41	0.95	-0.07
ubc-22	C06E2.7	C06E2.7	3.27	2.59	1.61	0.69
ins-9	C06E2.8	C06E2.8	2.67	1.53	2.2	1.14
C06E2.9	C06E2.9	C06E2.9	3.57	1	5.92	2.57	1
C06E4.1	C06E4.1	C06E4.1	2.41	1.5	1.88	0.91
C06E4.2	C06E4.2	C06E4.2	5.52	2.97	5.87	2.55	1
C06E4.3	C06E4.3	C06E4.3	4.95	2.35	6.06	2.6	1
C06E4.4	C06E4.4	C06E4.4	2.81	2.36	1.37	0.45
C06E4.5	C06E4.5	C06E4.5	3.34	2.33	2.01	1.01
C06E4.6	C06E4.6	C06E4.6	3.2	2.45	1.68	0.75
C06E4.7	C06E4.7	C06E4.7	5.31	2.87	5.42	2.44	1
C06E4.8	C06E4.8	C06E4.8	3.82	2.78	2.06	1.04
C06E7.1	C06E7.1	C06E7.1a.1	9.91	9.01	1.87	0.9
C06E7.1	C06E7.1	C06E7.1a.2	10.03	9.19	1.78	0.83
C06E7.1	C06E7.1	C06E7.1b	9.16	8.41	1.69	0.75
C06E7.1	C06E7.1	C06E7.1c	9.33	8.36	1.97	0.98
C06E7.1	C06E7.1	C06E7.1d	9.46	8.44	2.03	1.02
C06E7.2	C06E7.2	C06E7.2.1	5.26	3.48	3.45	1.79	1
C06E7.2	C06E7.2	C06E7.2.2	5.28	3.57	3.27	1.71	1
C06E7.3	C06E7.3	C06E7.3a	10.2	9.25	1.94	0.95
C06E7.3	C06E7.3	C06E7.3b.1	9.26	8.05	2.31	1.21
C06E7.3	C06E7.3	C06E7.3b.2	9.81	8.87	1.92	0.94
C06E7.3	C06E7.3	C06E7.3b.3	9.92	8.85	2.1	1.07
C06E7.3	C06E7.3	C06E7.3b.4	10.2	9.25	1.94	0.95
C06E7.4	C06E7.4	C06E7.4	7.9	6.49	2.66	1.41
spe-27	C06E7.6	C06E7.6	2.37	1.07	2.47	1.3
srv-17	C06E7.7	C06E7.7	3.63	2.4	2.36	1.24
prk-1	C06E8.3	C06E8.3a	8.36	6.81	2.92	1.55
prk-1	C06E8.3	C06E8.3b	8.25	6.43	3.54	1.82	1
prk-1	C06E8.3	C06E8.3c	8.39	6.82	2.97	1.57
C06E8.5	C06E8.5	C06E8.5	3.99	2.45	2.92	1.55
C06G1.1	C06G1.1	C06G1.1	4.19	3.67	1.44	0.53
C06G1.2	C06G1.2	C06G1.2	3.84	2.87	1.96	0.97
ain-1	C06G1.4	C06G1.4.1	8.25	7.44	1.75	0.81
ain-1	C06G1.4	C06G1.4.2	9.89	9.09	1.74	0.8
C06G1.5	C06G1.5	C06G1.5	6.04	3.95	4.26	2.09	1
cogc-2	C06G3.10	C06G3.10	8.21	7.33	1.85	0.89
tin-9.1	C06G3.11	C06G3.11a	6.24	6.46	0.86	-0.23
tin-9.1	C06G3.11	C06G3.11b.1	7.99	6.9	2.13	1.09
tin-9.1	C06G3.11	C06G3.11b.2	8.5	7.33	2.24	1.16
C06G3.12	C06G3.12	C06G3.12.1	3.95	1.25	6.47	2.69	1
C06G3.12	C06G3.12	C06G3.12.2	4.89	1.13	13.59	3.76	1
nhr-105	C06G3.1	C06G3.1a.1	5.73	4.13	3.04	1.6
nhr-105	C06G3.1	C06G3.1a.2	5.68	4.12	2.94	1.55
nhr-105	C06G3.1	C06G3.1b	5.75	4.07	3.21	1.68
klp-18	C06G3.2	C06G3.2	9.27	8.77	1.42	0.51
C06G3.3	C06G3.3	C06G3.3	8.54	6.58	3.89	1.96	1
C06G3.4	C06G3.4	C06G3.4	2.45	1.93	1.43	0.52
C06G3.5	C06G3.5	C06G3.5a	9.06	8.1	1.94	0.96
C06G3.5	C06G3.5	C06G3.5b.1	9.3	8.34	1.95	0.96
C06G3.5	C06G3.5	C06G3.5b.2	9.97	9.2	1.7	0.77
C06G3.6	C06G3.6	C06G3.6	7.48	6.77	1.63	0.7
trxr-1	C06G3.7	C06G3.7	8.45	7.52	1.91	0.94
C06G3.8	C06G3.8	C06G3.8	6.46	5.19	2.41	1.27
C06G3.9	C06G3.9	C06G3.9.1	8.16	6.93	2.34	1.23
C06G3.9	C06G3.9	C06G3.9.2	7.81	6.58	2.35	1.23
C06G4.1	C06G4.1	C06G4.1	7.31	6.23	2.12	1.08
clp-1	C06G4.2	C06G4.2a.1	9.23	8.18	2.07	1.05
clp-1	C06G4.2	C06G4.2a.2	9.23	8.18	2.07	1.05
clp-1	C06G4.2	C06G4.2b.1	9.03	7.77	2.39	1.26
clp-1	C06G4.2	C06G4.2b.2	8.52	7.4	2.16	1.11
clp-1	C06G4.2	C06G4.2b.3	8.95	7.62	2.51	1.33
clp-1	C06G4.2	C06G4.2c	8.34	7.78	1.48	0.56
clp-1	C06G4.2	C06G4.2d	9.12	8.11	2.02	1.01
C06G4.4	C06G4.4	C06G4.4	5.79	4.28	2.84	1.51
C06G4.5	C06G4.5	C06G4.5	4.44	3.3	2.2	1.14
C06G4.6	C06G4.6	C06G4.6	3.57	1.66	3.75	1.91	1
C06G8.1	C06G8.1	C06G8.1	6.28	4.19	4.25	2.09	1
opt-1	C06G8.2	C06G8.2	7.94	6.53	2.66	1.41
C06G8.3	C06G8.3	C06G8.3b.1	6.83	5.26	2.96	1.57
C06G8.3	C06G8.3	C06G8.3b.2	7.11	5.48	3.1	1.63
srd-7	C06G8.4	C06G8.4	2.25	1.19	2.09	1.06
atp-5	C06H2.1	C06H2.1.1	9.98	8.58	2.64	1.4
atp-5	C06H2.1	C06H2.1.2	10.49	8.99	2.84	1.5
C06H2.2	C06H2.2	C06H2.2	7.66	6.71	1.93	0.95
C06H2.3	C06H2.3	C06H2.3	5.98	5.89	1.07	0.1
tag-330	C06H2.4	C06H2.4	5.57	5.16	1.33	0.41
C06H2.5	C06H2.5	C06H2.5	4.71	2	6.53	2.71	1
C06H2.6	C06H2.6	C06H2.6.1	9.54	8.62	1.88	0.91
C06H2.6	C06H2.6	C06H2.6.2	9.77	8.97	1.74	0.8
C06H2.7	C06H2.7	C06H2.7	7.08	6.76	1.24	0.31
C06H5.1	C06H5.1	C06H5.1	6.02	5.06	1.95	0.96
C06H5.2	C06H5.2	C06H5.2	5.47	3.52	3.86	1.95	1
C06H5.6	C06H5.6	C06H5.6	6.48	5.16	2.5	1.32
C06H5.7	C06H5.7	C06H5.7.1	8.6	7.59	2	1
C06H5.7	C06H5.7	C06H5.7.2	8.86	7.8	2.09	1.06
C06H5.8	C06H5.8	C06H5.8	5.9	4.35	2.94	1.55
ham-2	C07A12.1	C07A12.1a	6.97	5.71	2.41	1.27
ham-2	C07A12.1	C07A12.1b	7.24	5.87	2.6	1.38
ham-2	C07A12.1	C07A12.1c	7.43	5.94	2.81	1.49
C07A12.2	C07A12.2	C07A12.2	5.25	4.32	1.9	0.92
nhr-35	C07A12.3	C07A12.3a	8.19	6.79	2.64	1.4
nhr-35	C07A12.3	C07A12.3b	8.31	6.93	2.61	1.38
pdi-2	C07A12.4	C07A12.4a.1	11.34	10.72	1.53	0.61
pdi-2	C07A12.4	C07A12.4a.2	11.1	10.5	1.51	0.6
pdi-2	C07A12.4	C07A12.4a.3	11.39	10.8	1.51	0.59
pdi-2	C07A12.4	C07A12.4b	11.5	10.98	1.44	0.53
spr-3	C07A12.5	C07A12.5a	6.56	6.15	1.33	0.41
spr-3	C07A12.5	C07A12.5b	6.58	6.35	1.17	0.23
C07A12.7	C07A12.7	C07A12.7a.1	7.64	6.58	2.08	1.06
C07A12.7	C07A12.7	C07A12.7a.2	7.76	6.78	1.98	0.99
C07A12.7	C07A12.7	C07A12.7b	8.18	7.13	2.07	1.05
C07A12.7	C07A12.7	C07A12.7c.1	8.18	7.13	2.07	1.05
C07A12.7	C07A12.7	C07A12.7c.2	8.08	7.2	1.84	0.88
C07A4.1	C07A4.1	C07A4.1	5.79	4.89	1.87	0.91
C07A4.2	C07A4.2	C07A4.2	4.55	3.16	2.62	1.39
C07A4.3	C07A4.3	C07A4.3	4.74	3.54	2.29	1.2
C07A9.1	C07A9.1	C07A9.1	2.61	1.37	2.36	1.24
C07A9.10	C07A9.10	C07A9.10	1.37	1.32	1.03	0.05
ncx-7	C07A9.11	C07A9.11	6	4.06	3.83	1.94	1
C07A9.12	C07A9.12	C07A9.12	4.78	3.25	2.88	1.53
C07A9.13	C07A9.13	C07A9.13	4.1	3.6	1.41	0.5
C07A9.2	C07A9.2	C07A9.2.1	8.7	8.31	1.32	0.4
C07A9.2	C07A9.2	C07A9.2.2	7.67	7.11	1.48	0.56
tlk-1	C07A9.3	C07A9.3a	10.2	9.59	1.52	0.6
tlk-1	C07A9.3	C07A9.3b	10.14	9.67	1.39	0.47
tlk-1	C07A9.3	C07A9.3c	10.42	9.95	1.38	0.46
ncx-6	C07A9.4	C07A9.4	5.33	3.13	4.59	2.2	1
C07A9.5	C07A9.5	C07A9.5	3.5	2.55	1.93	0.95
ugt-60	C07A9.6	C07A9.6.1	5.46	3.46	4	2	1
ugt-60	C07A9.6	C07A9.6.2	5.64	3.73	3.75	1.91	1
C07A9.7	C07A9.7	C07A9.7a	7.09	6.38	1.64	0.72
C07A9.7	C07A9.7	C07A9.7b	7.04	6.25	1.73	0.79
C07A9.8	C07A9.8	C07A9.8	4.61	2.3	4.95	2.31	1
C07A9.9	C07A9.9	C07A9.9	4.07	4.09	0.98	-0.03
C07B5.2	C07B5.2	C07B5.2	1.96	1.86	1.07	0.09
C07B5.3	C07B5.3	C07B5.3	4.36	2.73	3.09	1.63
C07B5.4	C07B5.4	C07B5.4a	5.34	3.85	2.81	1.49
C07B5.4	C07B5.4	C07B5.4b.1	5.61	3.99	3.07	1.62
C07B5.4	C07B5.4	C07B5.4b.2	5.26	3.91	2.55	1.35
nuc-1	C07B5.5	C07B5.5	10.32	9.6	1.65	0.73
C07B5.6	C07B5.6	C07B5.6	4.45	2.06	5.21	2.38	1
C07C7.1	C07C7.1	C07C7.1	2.99	1.83	2.24	1.16
C07D10.1	C07D10.1	C07D10.1	4.97	2.94	4.06	2.02	1
bath-44	C07D10.2	C07D10.2a	8.83	7.85	1.97	0.98
bath-44	C07D10.2	C07D10.2b.1	8.71	7.63	2.12	1.08
bath-44	C07D10.2	C07D10.2b.2	8.79	7.82	1.97	0.98
sre-3	C07D10.3	C07D10.3	3.62	1.84	3.43	1.78	1
nas-7	C07D10.4	C07D10.4	4.74	3.29	2.72	1.45
C07D10.5	C07D10.5	C07D10.5	7.42	6.56	1.81	0.86
C07D10.6	C07D10.6	C07D10.6	3.8	2.09	3.27	1.71	1
C07D8.2	C07D8.2	C07D8.2	5.8	3.47	5.01	2.33	1
C07D8.3	C07D8.3	C07D8.3	3.79	3.61	1.14	0.19
C07D8.5	C07D8.5	C07D8.5	5.72	3.1	6.17	2.63	1
C07D8.6	C07D8.6	C07D8.6.1	9.85	9.91	0.95	-0.07
C07D8.6	C07D8.6	C07D8.6.2	10.18	10.39	0.86	-0.21
C07E3.10	C07E3.10	C07E3.10	2.26	3.36	0.47	-1.09		1
C07E3.1	C07E3.1	C07E3.1a	7.71	7.07	1.56	0.64
C07E3.1	C07E3.1	C07E3.1b	7.61	6.9	1.64	0.71
pro-2	C07E3.2	C07E3.2.1	7.98	6.74	2.36	1.24
pro-2	C07E3.2	C07E3.2.2	8.19	6.92	2.42	1.28
C07E3.3	C07E3.3	C07E3.3	7.72	5.79	3.82	1.93	1
C07E3.4	C07E3.4	C07E3.4	5.13	3.01	4.34	2.12	1
C07E3.5	C07E3.5	C07E3.5	3.03	1.41	3.08	1.62
C07E3.6	C07E3.6	C07E3.6	6.38	5.81	1.49	0.57
C07E3.8	C07E3.8	C07E3.8	2.81	2.2	1.52	0.61
C07E3.9	C07E3.9	C07E3.9	7.98	7.65	1.25	0.32
tol-1	C07F11.1	C07F11.1	8.42	7.59	1.79	0.84
C07F11.2	C07F11.2	C07F11.2	4.41	2.13	4.86	2.28	1
try-2	C07G1.1	C07G1.1	3.13	2.12	2.02	1.02
C07G1.2	C07G1.2	C07G1.2	3.23	2.42	1.75	0.81
pct-1	C07G1.3	C07G1.3a.1	8.91	7.99	1.88	0.91
pct-1	C07G1.3	C07G1.3a.2	8.88	7.9	1.98	0.99
pct-1	C07G1.3	C07G1.3b	8.03	7.05	1.97	0.98
pct-1	C07G1.3	C07G1.3c	8.72	7.49	2.33	1.22
wsp-1	C07G1.4	C07G1.4a	7.68	6.83	1.81	0.85
wsp-1	C07G1.4	C07G1.4b	7.8	6.93	1.82	0.87
hgrs-1	C07G1.5	C07G1.5.1	7.2	6.33	1.83	0.87
hgrs-1	C07G1.5	C07G1.5.2	8.23	7.34	1.86	0.89
C07G1.6	C07G1.6	C07G1.6	3.42	1.78	3.11	1.64
C07G1.7	C07G1.7	C07G1.7	4.98	3	3.96	1.99	1
glrx-22	C07G1.8	C07G1.8	8.04	7.58	1.38	0.46
cej-1	C07G2.1	C07G2.1a.1	12.89	12.46	1.35	0.43
cej-1	C07G2.1	C07G2.1a.2	12.94	12.52	1.34	0.43
cej-1	C07G2.1	C07G2.1b.1	12.48	11.89	1.5	0.58
cej-1	C07G2.1	C07G2.1b.2	12.48	11.89	1.5	0.58
atf-7	C07G2.2	C07G2.2a.1	9.31	8.34	1.95	0.97
atf-7	C07G2.2	C07G2.2a.2	9.49	8.6	1.85	0.89
atf-7	C07G2.2	C07G2.2a.3	8.63	7.59	2.06	1.04
atf-7	C07G2.2	C07G2.2a.4	9.5	8.63	1.83	0.87
atf-7	C07G2.2	C07G2.2b	9.5	8.63	1.83	0.87
atf-7	C07G2.2	C07G2.2c.1	9.56	8.17	2.61	1.39
atf-7	C07G2.2	C07G2.2c.2	9.76	8.48	2.43	1.28
cct-5	C07G2.3	C07G2.3a	10.79	10.05	1.67	0.74
cct-5	C07G2.3	C07G2.3b.1	10.45	9.74	1.63	0.71
cct-5	C07G2.3	C07G2.3b.2	10.18	9.53	1.57	0.65
cct-5	C07G2.3	C07G2.3b.3	10.45	9.74	1.63	0.71
cct-5	C07G2.3	C07G2.3b.4	10.78	10.03	1.69	0.76
cct-5	C07G2.3	C07G2.3b.5	11.24	10.44	1.74	0.8
cct-5	C07G2.3	C07G2.3b.6	10.61	10.01	1.51	0.6
cct-5	C07G2.3	C07G2.3b.7	10.79	10.05	1.67	0.74
C07G3.10	C07G3.10	C07G3.10	4.74	3.59	2.22	1.15
C07G3.2	C07G3.2	C07G3.2	5.79	3.48	4.95	2.31	1
str-227	C07G3.3	C07G3.3	2.97	2.86	1.08	0.12
str-226	C07G3.4	C07G3.4	2.23	2.23	1	0
str-228	C07G3.5	C07G3.5	2.66	1.76	1.87	0.9
str-225	C07G3.6	C07G3.6	3.09	2.61	1.39	0.48
C07G3.8	C07G3.8	C07G3.8	3.32	2.34	1.97	0.98
ugt-64	C07G3.9	C07G3.9.1	7.15	6.43	1.65	0.72
ugt-64	C07G3.9	C07G3.9.2	7.37	6.68	1.62	0.7
C07H4.1	C07H4.1	C07H4.1	5.94	4.97	1.95	0.97
clh-5	C07H4.2	C07H4.2.1	7.81	6.65	2.23	1.16
clh-5	C07H4.2	C07H4.2.2	8.15	7	2.21	1.15
lig-4	C07H6.1	C07H6.1	6.99	5.97	2.02	1.02
C07H6.2	C07H6.2	C07H6.2	9.24	8.96	1.21	0.27
C07H6.3	C07H6.3	C07H6.3.1	7.81	6.08	3.33	1.74	1
C07H6.3	C07H6.3	C07H6.3.2	7.74	5.99	3.37	1.75	1
C07H6.4	C07H6.4	C07H6.4	8.33	7.66	1.59	0.67
cgh-1	C07H6.5	C07H6.5.1	11.79	11.15	1.56	0.64
cgh-1	C07H6.5	C07H6.5.2	12.09	11.51	1.49	0.58
clk-2	C07H6.6	C07H6.6	7.63	6.59	2.05	1.03
lin-39	C07H6.7	C07H6.7.1	5.8	3.82	3.94	1.98	1
lin-39	C07H6.7	C07H6.7.2	5.01	3.4	3.05	1.61
cux-7	C07H6.8	C07H6.8.1	6.9	6.57	1.25	0.33
cux-7	C07H6.8	C07H6.8.2	6.71	6.44	1.2	0.27
C07H6.9	C07H6.9	C07H6.9	2.62	1.73	1.86	0.89
sod-3	C08A9.1	C08A9.1	5.72	4.97	1.69	0.75
C08A9.10	C08A9.10	C08A9.10	9.9	9.06	1.79	0.84
C08A9.3	C08A9.3	C08A9.3	2.42	1.86	1.48	0.56
C08A9.6	C08A9.6	C08A9.6	6.48	5.89	1.51	0.6
sdz-2	C08A9.7	C08A9.7	3.57	3.8	0.85	-0.23
C08A9.8	C08A9.8	C08A9.8	4.78	3.97	1.75	0.81
C08A9.9	C08A9.9	C08A9.9	4.01	3.06	1.93	0.95
zyg-11	C08B11.1	C08B11.1	10.51	9.81	1.63	0.71
hda-2	C08B11.2	C08B11.2	7.82	6.48	2.53	1.34
C08B11.3	C08B11.3	C08B11.3	9.5	8.73	1.71	0.77
nrf-6	C08B11.4	C08B11.4	8.28	6.25	4.1	2.04	1
sap-49	C08B11.5	C08B11.5.1	7.84	7.6	1.18	0.24
sap-49	C08B11.5	C08B11.5.2	6.22	6.64	0.75	-0.42
sap-49	C08B11.5	C08B11.5.3	7.84	7.6	1.18	0.24
sap-49	C08B11.5	C08B11.5.4	7.81	7.34	1.39	0.47
C08B11.6	C08B11.6	C08B11.6.1	7.81	7.34	1.39	0.47
C08B11.6	C08B11.6	C08B11.6.2	7.88	7.03	1.8	0.85
ubh-4	C08B11.7	C08B11.7	7.49	6.19	2.46	1.3
C08B11.8	C08B11.8	C08B11.8	7.07	6.54	1.44	0.53
C08B11.9	C08B11.9	C08B11.9	7.86	7.28	1.5	0.59
ugt-17	C08B6.1	C08B6.1	7.55	4.69	7.26	2.86	1
C08B6.10	C08B6.10	C08B6.10	5.7	4.58	2.17	1.12
C08B6.11	C08B6.11	C08B6.11	4.89	3.22	3.2	1.68
srxa-18	C08B6.12	C08B6.12	2.8	1.31	2.82	1.5
srxa-19	C08B6.13	C08B6.13	2.04	2.46	0.75	-0.42
C08B6.14	C08B6.14	C08B6.14	3.8	2	3.5	1.81	1
C08B6.2	C08B6.2	C08B6.2	4.47	2.98	2.81	1.49
C08B6.3	C08B6.3	C08B6.3	5.05	3.63	2.69	1.43
C08B6.4	C08B6.4	C08B6.4a	4.59	2.48	4.3	2.11	1
C08B6.4	C08B6.4	C08B6.4b	4.26	2.37	3.7	1.89	1
C08B6.5	C08B6.5	C08B6.5	2.73	1.61	2.17	1.12
C08B6.6	C08B6.6	C08B6.6	2.01	1.35	1.59	0.67
C08B6.7	C08B6.7	C08B6.7	8.29	7.52	1.7	0.77
C08B6.8	C08B6.8	C08B6.8	8.51	8.32	1.14	0.19
aos-1	C08B6.9	C08B6.9	9.13	8.39	1.67	0.74
egl-5	C08C3.1	C08C3.1a	5.86	4.23	3.08	1.62
egl-5	C08C3.1	C08C3.1b	5.6	3.87	3.31	1.73	1
egl-5	C08C3.1	C08C3.1c	6.21	4.39	3.55	1.83	1
bath-15	C08C3.2	C08C3.2	6.45	6.44	1	0.01
mab-5	C08C3.3	C08C3.3	5.14	3.22	3.78	1.92	1
C08C3.4	C08C3.4	C08C3.4a	9.12	8.54	1.5	0.59
C08C3.4	C08C3.4	C08C3.4b	9.48	8.83	1.57	0.65
C08D8.1	C08D8.1	C08D8.1	3.64	2.41	2.35	1.23
tmd-2	C08D8.2	C08D8.2a	5.8	4.22	2.99	1.58
tmd-2	C08D8.2	C08D8.2b	5.94	4.25	3.23	1.69
C08E3.1	C08E3.1	C08E3.1	10.24	8.25	3.97	1.99	1
C08E3.10	C08E3.10	C08E3.10a	4.69	3.6	2.13	1.09
C08E3.10	C08E3.10	C08E3.10b	4.82	3.8	2.03	1.02
C08E3.11	C08E3.11	C08E3.11	4.29	2.26	4.08	2.03	1
C08E3.12	C08E3.12	C08E3.12	4.38	1.77	6.1	2.61	1
C08E3.13	C08E3.13	C08E3.13	8.47	5.96	5.72	2.52	1
C08E3.14	C08E3.14	C08E3.14	3.03	1.83	2.3	1.2
C08E3.15	C08E3.15	C08E3.15	4.78	2.29	5.59	2.48	1
C08E3.2	C08E3.2	C08E3.2	2.85	1.55	2.46	1.3
bath-33	C08E3.3	C08E3.3	3.54	1.37	4.51	2.17	1
C08E3.4	C08E3.4	C08E3.4	3.02	2.08	1.91	0.94
C08E3.5	C08E3.5	C08E3.5	4.17	3.16	2	1
C08E3.6	C08E3.6	C08E3.6	5.22	3.99	2.35	1.23
C08E3.7	C08E3.7	C08E3.7	5.57	4.13	2.73	1.45
C08E3.8	C08E3.8	C08E3.8	4.68	2.33	5.1	2.35	1
C08E3.9	C08E3.9	C08E3.9	4.1	3.28	1.77	0.82
C08E8.1	C08E8.1	C08E8.1	3.4	0.67	6.65	2.73	1
C08E8.2	C08E8.2	C08E8.2	5.6	2.98	6.14	2.62	1
C08E8.3	C08E8.3	C08E8.3	3.86	1.75	4.32	2.11	1
C08E8.4	C08E8.4	C08E8.4	6.15	4.49	3.16	1.66
C08E8.5	C08E8.5	C08E8.5	1	1.44	0.74	-0.44
C08E8.6	C08E8.6	C08E8.6	3.28	2.45	1.78	0.83
math-2	C08F1.1	C08F1.1	2.05	1.11	1.92	0.94
C08F1.10	C08F1.10	C08F1.10	5.93	5.1	1.78	0.83
C08F1.11	C08F1.11	C08F1.11	4.4	2.51	3.72	1.89	1
fbxb-13	C08F1.3	C08F1.3	5.69	4.43	2.4	1.26
math-3	C08F1.4	C08F1.4a	6.24	4.17	4.18	2.06	1
math-3	C08F1.4	C08F1.4b	6.26	4.2	4.18	2.06	1
math-4	C08F1.5	C08F1.5a	5.23	2.87	5.15	2.37	1
math-4	C08F1.5	C08F1.5b	5.14	2.84	4.9	2.29	1
C08F1.6	C08F1.6	C08F1.6	5.74	5.75	1	0
C08F1.8	C08F1.8	C08F1.8	4.21	2.64	2.97	1.57
C08F11.1	C08F11.1	C08F11.1	3.65	1.77	3.69	1.88	1
C08F11.10	C08F11.10	C08F11.10	4.34	3.31	2.04	1.03
C08F11.11	C08F11.11	C08F11.11	11.38	10.47	1.87	0.9
C08F11.12	C08F11.12	C08F11.12.1	9.03	8.18	1.8	0.85
C08F11.12	C08F11.12	C08F11.12.2	9.11	8.31	1.75	0.8
C08F11.13	C08F11.13	C08F11.13.1	7.98	6.25	3.31	1.73	1
C08F11.13	C08F11.13	C08F11.13.2	8.16	6.43	3.31	1.73	1
C08F11.14	C08F11.14	C08F11.14	3.44	1.61	3.57	1.84	1
C08F11.17	C08F11.17	C08F11.17	2.84	1.24	3.03	1.6
C08F11.2	C08F11.2	C08F11.2	3.16	2.34	1.76	0.82
C08F11.3	C08F11.3	C08F11.3	4.83	2.84	3.96	1.98	1
sru-21	C08F11.4	C08F11.4	2.94	2.05	1.86	0.89
fbxa-98	C08F11.5	C08F11.5	4.79	3.84	1.92	0.94
C08F11.7	C08F11.7	C08F11.7	4.26	2.44	3.53	1.82	1
ugt-22	C08F11.8	C08F11.8	7.56	5.64	3.78	1.92	1
srz-29	C08F11.9	C08F11.9	2.72	1.57	2.22	1.15
pfd-1	C08F8.1	C08F8.1	9.25	8.7	1.46	0.55
C08F8.2	C08F8.2	C08F8.2a	7.36	6.35	2.01	1.01
C08F8.2	C08F8.2	C08F8.2b.1	7.68	6.71	1.95	0.97
C08F8.2	C08F8.2	C08F8.2b.2	7.68	6.71	1.95	0.97
C08F8.3	C08F8.3	C08F8.3	8.67	8.42	1.19	0.25
C08F8.4	C08F8.4	C08F8.4	2.61	2.42	1.14	0.19
fbxb-9	C08F8.5	C08F8.5	2	2.37	0.77	-0.38
C08F8.6	C08F8.6	C08F8.6	3.01	2.2	1.76	0.81
rap-3	C08F8.7	C08F8.7	5.11	4.27	1.79	0.84
nhr-67	C08F8.8	C08F8.8	4.48	3.31	2.24	1.16
C08F8.9	C08F8.9	C08F8.9	6.05	4.24	3.5	1.81	1
C08G5.1	C08G5.1	C08G5.1	2.93	2.2	1.65	0.73
C08G5.2	C08G5.2	C08G5.2	2.86	2.35	1.43	0.52
C08G5.3	C08G5.3	C08G5.3	4.37	2.8	2.98	1.57
snt-6	C08G5.4	C08G5.4	5.64	4.21	2.7	1.43
C08G5.5	C08G5.5	C08G5.5	4.86	4.26	1.51	0.6
C08G5.6	C08G5.6	C08G5.6	3.88	2.1	3.44	1.78	1
C08G5.7	C08G5.7	C08G5.7a	3.96	1.99	3.91	1.97	1
C08G5.7	C08G5.7	C08G5.7b	3.99	2.48	2.85	1.51
C08G9.1	C08G9.1	C08G9.1	6.67	5.66	2.02	1.01
C08G9.2	C08G9.2	C08G9.2	3.81	2.41	2.63	1.4
C08H9.1	C08H9.1	C08H9.1	2.6	1.85	1.68	0.75
C08H9.10	C08H9.10	C08H9.10	3.87	2.31	2.95	1.56
C08H9.11	C08H9.11	C08H9.11	2.61	1.29	2.5	1.32
C08H9.12	C08H9.12	C08H9.12	2.55	2.19	1.29	0.36
C08H9.13	C08H9.13	C08H9.13	3.64	2.5	2.2	1.14
C08H9.14	C08H9.14	C08H9.14	2.38	1.7	1.6	0.67
C08H9.15	C08H9.15	C08H9.15	7.6	7.06	1.45	0.54
C08H9.2	C08H9.2	C08H9.2	11.37	10.4	1.97	0.98
C08H9.3	C08H9.3	C08H9.3a	6.7	5.67	2.03	1.02
C08H9.3	C08H9.3	C08H9.3b	6.98	5.7	2.43	1.28
C08H9.4	C08H9.4	C08H9.4a	3	1.28	3.29	1.72	1
C08H9.4	C08H9.4	C08H9.4b	2.95	1.15	3.47	1.8	1
old-1	C08H9.5	C08H9.5	2.87	1.76	2.17	1.12
C08H9.6	C08H9.6	C08H9.6	3.28	2.5	1.73	0.79
C08H9.7	C08H9.7	C08H9.7	3.05	2.06	1.99	0.99
C08H9.8	C08H9.8	C08H9.8	3.35	1.86	2.8	1.48
ser-7	C09B7.1	C09B7.1a	4.55	2.94	3.05	1.61
ser-7	C09B7.1	C09B7.1b	4.31	2.53	3.42	1.77	1
ser-7	C09B7.1	C09B7.1c	4.09	2.8	2.44	1.28
C09B7.2	C09B7.2	C09B7.2	5.28	4.03	2.38	1.25
ipp-5	C09B8.1	C09B8.1	7.28	6.2	2.11	1.08
C09B8.3	C09B8.3	C09B8.3	3.76	2.34	2.68	1.42
C09B8.4	C09B8.4	C09B8.4	4.02	2.42	3.03	1.6
C09B8.5	C09B8.5	C09B8.5	4.38	4.22	1.12	0.17
hsp-25	C09B8.6	C09B8.6a	8.86	7.75	2.16	1.11
hsp-25	C09B8.6	C09B8.6b	9.21	8.36	1.79	0.84
hsp-25	C09B8.6	C09B8.6c.1	8.16	7.18	1.98	0.99
hsp-25	C09B8.6	C09B8.6c.2	8.08	6.9	2.27	1.18
hsp-25	C09B8.6	C09B8.6c.3	7.91	6.93	1.97	0.98
hsp-25	C09B8.6	C09B8.6c.4	9.21	8.36	1.79	0.84
pak-1	C09B8.7	C09B8.7a.1	7.57	6.68	1.86	0.89
pak-1	C09B8.7	C09B8.7a.2	7.57	6.68	1.86	0.89
pak-1	C09B8.7	C09B8.7b	7.43	6.54	1.86	0.89
pak-1	C09B8.7	C09B8.7c.1	7.43	6.54	1.86	0.89
pak-1	C09B8.7	C09B8.7c.2	7.97	6.82	2.22	1.15
pak-1	C09B8.7	C09B8.7e.1	6.85	5.64	2.31	1.21
pak-1	C09B8.7	C09B8.7e.2	7.43	6.54	1.86	0.89
pak-1	C09B8.7	C09B8.7e.3	7.43	6.54	1.86	0.89
C09B8.8	C09B8.8	C09B8.8	3.47	1.89	2.99	1.58
C09B9.1	C09B9.1	C09B9.1	4.29	2.35	3.84	1.94	1
C09B9.2	C09B9.2	C09B9.2	3.2	2.14	2.08	1.06
C09B9.3	C09B9.3	C09B9.3	2.24	1.96	1.21	0.28
C09B9.4	C09B9.4	C09B9.4	4.56	2.36	4.61	2.2	1
msp-55	C09B9.6	C09B9.6	7.56	5.36	4.57	2.19	1
C09B9.7	C09B9.7	C09B9.7	5.14	2.21	7.63	2.93	1
C09B9.8	C09B9.8	C09B9.8	4.31	2.69	3.07	1.62
zig-4	C09C7.1	C09C7.1	5.43	3.66	3.42	1.77	1
unc-89	C09D1.1	C09D1.1a	8	6.31	3.22	1.69
unc-89	C09D1.1	C09D1.1b	7.79	6.19	3.03	1.6
unc-89	C09D1.1	C09D1.1c	7.12	5.85	2.41	1.27
unc-89	C09D1.1	C09D1.1d	7.18	5.99	2.28	1.19
unc-89	C09D1.1	C09D1.1e	7.93	6.25	3.2	1.68
unc-89	C09D1.1	C09D1.1f	7.83	6.25	2.99	1.58
unc-89	C09D1.1	C09D1.1g	7.98	6.34	3.1	1.63
C09D1.2	C09D1.2	C09D1.2	4	2.03	3.92	1.97	1
C09D4.1	C09D4.1	C09D4.1a	6.41	4.56	3.6	1.85	1
C09D4.1	C09D4.1	C09D4.1b.1	7.04	4.83	4.63	2.21	1
C09D4.1	C09D4.1	C09D4.1b.2	7.04	4.83	4.63	2.21	1
C09D4.2	C09D4.2	C09D4.2	8.91	7.76	2.21	1.14
C09D4.3	C09D4.3	C09D4.3	3.63	2.26	2.6	1.38
C09D4.4	C09D4.4	C09D4.4a	8.39	7.13	2.39	1.26
C09D4.4	C09D4.4	C09D4.4b	8.39	7.13	2.39	1.26
C09D4.4	C09D4.4	C09D4.4c	8.41	7.11	2.46	1.3
rpl-19	C09D4.5	C09D4.5.1	10.67	9.18	2.8	1.48
rpl-19	C09D4.5	C09D4.5.2	9.71	8.33	2.6	1.38
rpl-19	C09D4.5	C09D4.5.3	8.83	7.89	1.92	0.94
rpl-19	C09D4.5	C09D4.5.4	10.67	9.18	2.8	1.48
C09D4.6	C09D4.6	C09D4.6	2.79	1.74	2.07	1.05
ptp-3	C09D8.1	C09D8.1a	7.79	6.79	2	1
ptp-3	C09D8.1	C09D8.1b	8.82	7.81	2.01	1.01
ptp-3	C09D8.1	C09D8.1c	8.85	7.82	2.05	1.03
dgk-1	C09E10.2	C09E10.2a	6.52	3.95	5.93	2.57	1
dgk-1	C09E10.2	C09E10.2b	6.53	3.95	5.95	2.57	1
dgk-1	C09E10.2	C09E10.2c	6.45	3.92	5.77	2.53	1
dgk-1	C09E10.2	C09E10.2d	6.45	3.92	5.79	2.53	1
dgk-1	C09E10.2	C09E10.2e	6.58	4.13	5.44	2.44	1
srxa-5	C09E7.1	C09E7.1	3.61	1.57	4.11	2.04	1
C09E7.10	C09E7.10	C09E7.10	4.2	2.37	3.56	1.83	1
pqn-10	C09E7.2	C09E7.2	3.72	2.24	2.79	1.48
oig-1	C09E7.3	C09E7.3	4.11	3.13	1.97	0.98
C09E7.4	C09E7.4	C09E7.4	5.94	4.97	1.95	0.96
[truncated: 25,323 more rows]
