# Supplementary material for: A Comprehensive Analysis of Gene Expression Changes Provoked by Bacterial and Fungal Infection in C. elegans
Source: PLoS One. 2011 May 13;6(5):e19055. doi: 10.1371/journal.pone.0019055 (PMC3094335; doi:10.1371/journal.pone.0019055)
Supplement: Table S4 — Expression of transcripts after infection with E. faecalis for 24 hours using RNA-seq. Public gene, sequence and transcript names come from WS170. The values in the columns EF and OP50 are the dcpm values calculated for each individual transcript (see Methods) for samples from worms infected for 24 h with E. faecalis strain OG1RF, or age-matched uninfected control worms. Transcripts identified as up- or down-regulated by infection (see Methods) are indicated. “nan” signifies that there were zero bases in the denominator (see Methods). (XLS) [file pone.0019055.s008.xls]

## Sheet: RNA-seq_E.faecalis
GenePublicName	SequenceNameGene	SequenceNameTranscript	EF	OP50	Ratio_EFvsOP50	log2_Ratio_EFvsOP50	Infection_upregulated	Infection_downregulated
2L52.1	2L52.1	2L52.1	0,065336	0,082443	0.792504	-0.33551
2RSSE.1	2RSSE.1	2RSSE.1	0,803577	0,545563	1.47293	0.55869
2RSSE.2	2RSSE.2	2RSSE.2	0,157082	0,103366	1.51967	0.603756
3R5.1	3R5.1	3R5.1	0,179279	0,266413	0.672936	-0.571458
nas-6	4R79.1	4R79.1a	0,022576	0,007624	2.96112	1.56614
nas-6	4R79.1	4R79.1b	0,036276	0,005189	6.99102	2.8055	1
4R79.2	4R79.2	4R79.2	0,019526	0,00687	2.84215	1.50698
6R55.1	6R55.1	6R55.1a	1,18305	1,01709	1.16317	0.218064
6R55.1	6R55.1	6R55.1b	1,20363	0,955516	1.25966	0.33304
6R55.2	6R55.2	6R55.2	0,029982	0,041001	0.73126	-0.451543
sri-20	AC3.1	AC3.1	0,004567	0,000021	217.473	7.76469	1
spe-10	AC3.10	AC3.10	0,015716	0,003352	4.68848	2.22912	1
ugt-49	AC3.2	AC3.2	0,339245	0,190666	1.77926	0.83128
abu-1	AC3.3	AC3.3	0,026041	0,007244	3.59486	1.84594	1
pqn-2	AC3.4	AC3.4	0,013949	0
AC3.5	AC3.5	AC3.5.1	0,322698	0,194448	1.65956	0.7308
AC3.5	AC3.5	AC3.5.2	0,324668	0,182211	1.78182	0.833355
col-151	AC3.6	AC3.6	0,0091	0,002194	4.14774	2.05233	1
ugt-1	AC3.7	AC3.7	0,145246	0,066653	2.17914	1.12376
ugt-2	AC3.8	AC3.8	0,313216	0,050191	6.24048	2.64166	1
tag-49	AC7.1	AC7.1a	0,045547	0,012049	3.78012	1.91843	1
tag-49	AC7.1	AC7.1b	0,040745	0,011211	3.63439	1.86171	1
soc-2	AC7.2	AC7.2a.1	0,665048	0,348719	1.90712	0.931393
soc-2	AC7.2	AC7.2a.2	0,622473	0,298924	2.08238	1.05823
soc-2	AC7.2	AC7.2b	0,570686	0,272344	2.09546	1.06727
AC7.3	AC7.3	AC7.3	0,008261	0
AC8.10	AC8.10	AC8.10	nan	nan
AC8.11	AC8.11	AC8.11	nan	nan
AC8.12	AC8.12	AC8.12	nan	nan
AC8.3	AC8.3	AC8.3	nan	nan
AC8.4	AC8.4	AC8.4	nan	nan
AC8.7	AC8.7	AC8.7	nan	nan
AH10.1	AH10.1	AH10.1	0,021404	0,00065	32.9288	5.04128	1
AH10.2	AH10.2	AH10.2	0,003481	0,005138	0.677427	-0.561863
AH10.3	AH10.3	AH10.3	0,03778	0,006977	5.41495	2.43695	1
AH10.4	AH10.4	AH10.4	0,012781	0,058191	0.219639	-2.1868		1
gcy-1	AH6.1	AH6.1	0	0
sra-6	AH6.10	AH6.10	0,007482	0,000375	19.9528	4.31852	1
sra-7	AH6.11	AH6.11	0	0
sra-8	AH6.12	AH6.12	0	0
sra-9	AH6.14	AH6.14	0	0
AH6.2	AH6.2	AH6.2	0,008408	0
AH6.3	AH6.3	AH6.3	0,00134	0
sra-1	AH6.4	AH6.4	0	0
mex-6	AH6.5	AH6.5	7,10174	3,39756	2.09025	1.06367
sra-2	AH6.6	AH6.6	0	0
sra-3	AH6.7	AH6.7	0,001135	0,000749	1.51567	0.59996
sra-4	AH6.8	AH6.8	0	0
AH9.1	AH9.1	AH9.1	0,045098	0,019237	2.34432	1.22917
crn-4	AH9.2	AH9.2	0,440761	0,382421	1.15255	0.204835
AH9.3	AH9.3	AH9.3	0,252417	0,425061	0.593837	-0.751861
AH9.4	AH9.4	AH9.4	0,034883	0,020632	1.69071	0.757632
AH9.6	AH9.6	AH9.6	0,177534	0,114943	1.54454	0.627177
B0001.1	B0001.1	B0001.1	2,86041	1,92265	1.48774	0.573126
B0001.2	B0001.2	B0001.2	0,63881	0,304875	2.09532	1.06717
B0001.3	B0001.3	B0001.3	0,771574	0,415656	1.85628	0.892414
B0001.4	B0001.4	B0001.4	2,0821	0,819719	2.54002	1.34484
B0001.5	B0001.5	B0001.5	0,853035	0,475407	1.79433	0.843442
B0001.6	B0001.6	B0001.6.1	1,51156	1,40522	1.07567	0.105242
B0001.6	B0001.6	B0001.6.2	1,50095	1,40025	1.07192	0.100191
B0001.6	B0001.6	B0001.6.3	1,53558	1,34134	1.14481	0.195109
B0001.7	B0001.7	B0001.7	0,646795	0,360367	1.79482	0.843842
B0001.8	B0001.8	B0001.8.1	0,551219	0,452605	1.21788	0.284373
B0001.8	B0001.8	B0001.8.2	0,582738	0,451013	1.29206	0.369678
B0001.8	B0001.8	B0001.8.3	0,582888	0,450563	1.29369	0.37149
amx-2	B0019.1	B0019.1	0,45167	0,283053	1.59571	0.674197
B0019.2	B0019.2	B0019.2	0,713517	0,366317	1.94781	0.961855
col-149	B0024.1	B0024.1	0,275019	0,068379	4.02198	2.00791	1
B0024.10	B0024.10	B0024.10.1	1,03356	0,695898	1.48522	0.570674
B0024.10	B0024.10	B0024.10.2	1,01875	0,675303	1.50858	0.593193
B0024.11	B0024.11	B0024.11	0,736889	0,448906	1.64152	0.715034
gna-1	B0024.12	B0024.12	0,108077	0,071798	1.50529	0.590044
B0024.13	B0024.13	B0024.13a	2,71035	1,27197	2.13083	1.09141
B0024.13	B0024.13	B0024.13b	2,28376	1,0057	2.27082	1.18321
crm-1	B0024.14	B0024.14a	1,30463	0,613798	2.1255	1.0878
crm-1	B0024.14	B0024.14b	1,26417	0,581463	2.17412	1.12043
crm-1	B0024.14	B0024.14c.1	1,29063	0,629957	2.04876	1.03475
crm-1	B0024.14	B0024.14c.2	1,20932	0,552662	2.18817	1.12973
crm-1	B0024.14	B0024.14d	1,3068	0,608112	2.14895	1.10363
crm-1	B0024.14	B0024.14e	1,305	0,656593	1.98753	0.990979
B0024.15	B0024.15	B0024.15	0,007736	0,000351	22.0404	4.46208	1
col-150	B0024.2	B0024.2	0,105165	0,056688	1.85515	0.891539
B0024.3	B0024.3	B0024.3	0,085003	0,017719	4.79726	2.26221	1
B0024.4	B0024.4	B0024.4	0,153246	0,115402	1.32793	0.409181
gcy-6	B0024.6	B0024.6	0,001594	0,000143	11.1468	3.47856	1
B0024.8	B0024.8	B0024.8	0,066911	0,021476	3.11562	1.63952
trx-2	B0024.9	B0024.9.1	1,11786	1,33402	0.837963	-0.255041
trx-2	B0024.9	B0024.9.2	1,8831	2,65599	0.709001	-0.49614
vps-34	B0025.1	B0025.1a	0,736796	0,424152	1.7371	0.796684
vps-34	B0025.1	B0025.1b.1	0,687198	0,380178	1.80757	0.854051
vps-34	B0025.1	B0025.1b.2	0,736824	0,423853	1.7384	0.797756
vps-34	B0025.1	B0025.1c.1	0,736824	0,423853	1.7384	0.797756
vps-34	B0025.1	B0025.1c.2	0,742684	0,4143	1.79262	0.842073
vps-34	B0025.1	B0025.1d.1	0,737044	0,419454	1.75715	0.813238
vps-34	B0025.1	B0025.1d.2	0,738386	0,418042	1.7663	0.820727
vps-34	B0025.1	B0025.1e	0,737044	0,419454	1.75715	0.813238
csn-2	B0025.2	B0025.2.1	1,88	1,30739	1.43798	0.524043
csn-2	B0025.2	B0025.2.2	1,66733	1,09473	1.52305	0.606965
csn-2	B0025.2	B0025.2.3	1,66845	1,09531	1.52327	0.607169
csn-2	B0025.2	B0025.2.4	1,65957	1,09072	1.52154	0.605529
B0025.4	B0025.4	B0025.4	0,826998	0,727333	1.13703	0.185268
B0034.1	B0034.1	B0034.1	0,072193	0,075677	0.953968	-0.0679879
B0034.2	B0034.2	B0034.2	0	0
casy-1	B0034.3	B0034.3a	2,83603	0,920698	3.0803	1.62307
casy-1	B0034.3	B0034.3b	5,37253	1,14754	4.68178	2.22706	1
casy-1	B0034.3	B0034.3c.1	2,72585	0,876363	3.11041	1.63711
casy-1	B0034.3	B0034.3c.2	2,94491	0,766263	3.84321	1.94231	1
B0034.4	B0034.4	B0034.4	0,027174	0,00476	5.70878	2.51318	1
B0034.5	B0034.5	B0034.5	0,018349	0,00396	4.63359	2.21213	1
B0034.7	B0034.7	B0034.7	0,049759	0,101311	0.49115	-1.02576
his-45	B0035.10	B0035.10	nan	nan
B0035.11	B0035.11	B0035.11	1,75383	1,17231	1.49605	0.581155
B0035.12	B0035.12	B0035.12.1	0,900962	0,555504	1.62188	0.697669
B0035.12	B0035.12	B0035.12.2	0,947475	0,549401	1.72456	0.786228
B0035.13	B0035.13	B0035.13	0,549022	0,344965	1.59153	0.670414
dnj-1	B0035.14	B0035.14.1	0,945556	0,521411	1.81346	0.858742
dnj-1	B0035.14	B0035.14.2	1,50487	0,833816	1.8048	0.851838
B0035.15	B0035.15	B0035.15	0,468486	0,315219	1.48622	0.571651
B0035.16	B0035.16	B0035.16	0,102459	0,075989	1.34834	0.431184
B0035.18	B0035.18	B0035.18	3,03623	6,45083	0.470673	-1.0872
B0035.1	B0035.1	B0035.1a	3,97239	2,10726	1.8851	0.914639
B0035.1	B0035.1	B0035.1b	3,52353	2,01772	1.74629	0.804296
dnj-2	B0035.2	B0035.2	0,586166	0,369973	1.58435	0.663889
B0035.3	B0035.3	B0035.3	3,34063	1,79038	1.86588	0.899854
pfd-4	B0035.4	B0035.4.1	2,11581	3,53256	0.598945	-0.739504
pfd-4	B0035.4	B0035.4.2	3,46884	4,25644	0.814963	-0.295194
pfd-4	B0035.4	B0035.4.3	2,11216	3,51235	0.601352	-0.733717
B0035.5	B0035.5	B0035.5.1	0,938857	0,368422	2.54832	1.34955
B0035.5	B0035.5	B0035.5.2	0,975153	0,371403	2.62559	1.39264
B0035.6	B0035.6	B0035.6	1,35338	0,658982	2.05374	1.03826
his-47	B0035.7	B0035.7	nan	nan
his-48	B0035.8	B0035.8	0,551667	1,33886	0.412042	-1.27914
his-46	B0035.9	B0035.9	nan	nan
B0041.1	B0041.1	B0041.1	0,002046	0
B0041.2	B0041.2	B0041.2a.1	3,78024	1,92882	1.95987	0.970759
B0041.2	B0041.2	B0041.2a.2	3,77952	1,92835	1.95998	0.970836
B0041.2	B0041.2	B0041.2b	2,59987	1,5419	1.68615	0.75373
B0041.2	B0041.2	B0041.2c	3,85774	1,76866	2.18117	1.1251
B0041.3	B0041.3	B0041.3	0,463421	0,640204	0.723865	-0.466208
rpl-4	B0041.4	B0041.4.1	109,974	43,0345	2.55548	1.3536
rpl-4	B0041.4	B0041.4.2	109,015	44,5966	2.44447	1.28952
rpl-4	B0041.4	B0041.4.3	110,727	42,7426	2.59055	1.37326
B0041.5	B0041.5	B0041.5	1,37476	0,756011	1.81844	0.862701
ptps-1	B0041.6	B0041.6a	0,23422	0,3181	0.736309	-0.441616
ptps-1	B0041.6	B0041.6b	0,234775	0,318854	0.736309	-0.441617
xnp-1	B0041.7	B0041.7	0,841497	0,474752	1.7725	0.825784
B0041.8	B0041.8	B0041.8.1	1,70128	1,45153	1.17206	0.229046
B0041.8	B0041.8	B0041.8.2	2,24283	1,38309	1.62161	0.697425
bath-20	B0047.1	B0047.1a	0,014811	0,020339	0.728222	-0.45755
bath-20	B0047.1	B0047.1b	0,015809	0,017521	0.90226	-0.148385
B0047.2	B0047.2	B0047.2	0,019251	0,014085	1.36677	0.450774
bath-24	B0047.3	B0047.3	0,054797	0,043517	1.2592	0.332513
math-1	B0047.4	B0047.4	0	0,001373	0
tsp-20	B0198.1	B0198.1	0,11572	0,045097	2.56602	1.35953
B0198.2	B0198.2	B0198.2	0,077949	0,040265	1.93589	0.952995
B0198.3	B0198.3	B0198.3	0,147914	0,059728	2.47646	1.30828
B0205.10	B0205.10	B0205.10.1	0,039583	0,004583	8.63698	3.11053	1
B0205.10	B0205.10	B0205.10.2	0,039362	0,004731	8.32002	3.05659	1
B0205.11	B0205.11	B0205.11	1,27146	0,783002	1.62383	0.699398
B0205.12	B0205.12	B0205.12	1,13365	5,00477	0.226514	-2.14233		1
B0205.13	B0205.13	B0205.13	0,056591	0,095967	0.589696	-0.761956
B0205.14	B0205.14	B0205.14	0,07809	0,215069	0.363092	-1.46159
B0205.1	B0205.1	B0205.1a	0,613153	0,32097	1.91031	0.933809
B0205.1	B0205.1	B0205.1b	0,569026	0,298917	1.90363	0.92875
srz-85	B0205.2	B0205.2a	0,00456	0
srz-85	B0205.2	B0205.2b	0,0052	0
rpn-10	B0205.3	B0205.3.1	2,882	1,55073	1.85848	0.894123
rpn-10	B0205.3	B0205.3.2	2,96029	1,60941	1.83936	0.879207
B0205.4	B0205.4	B0205.4	0,016917	0,003548	4.76812	2.25342	1
B0205.5	B0205.5	B0205.5	0,013615	0,083479	0.163096	-2.61621		1
B0205.6	B0205.6	B0205.6	0,860584	0,392497	2.19259	1.13263
kin-3	B0205.7	B0205.7.1	6,0102	4,46593	1.34579	0.428452
kin-3	B0205.7	B0205.7.2	6,96819	4,42019	1.57645	0.656676
B0205.8	B0205.8	B0205.8	1,30628	2,20944	0.591227	-0.758217
B0205.9	B0205.9	B0205.9	0,567918	0,369804	1.53573	0.618922
B0207.1	B0207.1	B0207.1	0,006528	0,001195	5.4629	2.44967	1
B0207.10	B0207.10	B0207.10	0,133265	0,427029	0.312075	-1.68004		1
B0207.11	B0207.11	B0207.11	0,004893	0
41730	B0207.12	B0207.12a	0,175841	0,047282	3.71898	1.89491	1
41730	B0207.12	B0207.12b	0,170598	0,043273	3.94237	1.97906	1
41730	B0207.12	B0207.12c	0,183568	0,0346	5.30543	2.40747	1
B0207.2	B0207.2	B0207.2	0,130371	0,057894	2.25189	1.17114
gpa-14	B0207.3	B0207.3a	0,033818	0,011539	2.93073	1.55126
gpa-14	B0207.3	B0207.3b	0,031955	0,012316	2.59461	1.37552
air-2	B0207.4	B0207.4	1,49479	1,14068	1.31044	0.390049
B0207.5	B0207.5	B0207.5	0,005262	0,001319	3.98925	1.99612	1
B0207.6	B0207.6	B0207.6	0,749262	0,43801	1.7106	0.774506
B0207.7	B0207.7	B0207.7	0,004581	0,000612	7.48565	2.90413	1
B0207.8	B0207.8	B0207.8	0	0
B0207.9	B0207.9	B0207.9	0,00336	0
B0212.1	B0212.1	B0212.1	0,015509	0,005792	2.67759	1.42093
sre-5	B0212.2	B0212.2	0,009803	0,005943	1.64955	0.72207
B0212.3	B0212.3	B0212.3	0,088096	0,060006	1.46811	0.553963
B0212.4	B0212.4	B0212.4a	0,106557	0,072623	1.46726	0.553127
B0212.4	B0212.4	B0212.4b	0,10709	0,073106	1.46486	0.550762
B0212.4	B0212.4	B0212.4c	0,1229	0,085763	1.43302	0.519058
osm-9	B0212.5	B0212.5	0,062704	0,041471	1.512	0.596459
B0212.6	B0212.6	B0212.6	0,034732	0,007345	4.72865	2.24143	1
cyp-34A5	B0213.10	B0213.10	0,037574	0,010948	3.43204	1.77907	1
cyp-34A6	B0213.11	B0213.11	0,031168	0,019452	1.60231	0.680152
cyp-34A7	B0213.12	B0213.12	0,019651	0,001337	14.6981	3.87755	1
cyp-34A8	B0213.14	B0213.14	0,378219	0,208059	1.81784	0.862229
cyp-34A9	B0213.15	B0213.15a	0,535838	0,453694	1.18106	0.240077
cyp-34A9	B0213.15	B0213.15b	0,545892	0,455943	1.19728	0.259762
cyp-34A9	B0213.15	B0213.15c	0,536128	0,519495	1.03202	0.0454676
cyp-34A10	B0213.16	B0213.16	0,049342	0,022541	2.18897	1.13025
nlp-34	B0213.17	B0213.17.1	1,72556	11,9804	0.144032	-2.79554		1
nlp-34	B0213.17	B0213.17.2	1,51785	10,4626	0.145074	-2.78514		1
nlp-27	B0213.2	B0213.2	7,20475	94,0393	0.0766142	-3.70624		1
nlp-28	B0213.3	B0213.3	1,47749	7,17455	0.205935	-2.27974		1
nlp-29	B0213.4	B0213.4	2,32046	10,0979	0.229796	-2.12157		1
nlp-30	B0213.5	B0213.5	0,070375	0,165873	0.424272	-1.23694
nlp-31	B0213.6	B0213.6	1,47457	4,53151	0.325404	-1.6197		1
str-83	B0213.7	B0213.7	0	0
str-82	B0213.8	B0213.8	0	0
str-247	B0213.9	B0213.9	0	0
B0218.1	B0218.1	B0218.1a.1	1,02319	0,484341	2.11254	1.07898
B0218.1	B0218.1	B0218.1a.2	1,19043	0,544476	2.18638	1.12854
B0218.1	B0218.1	B0218.1a.3	1,1999	0,544906	2.20203	1.13883
B0218.1	B0218.1	B0218.1a.4	1,20302	0,544433	2.20968	1.14383
B0218.1	B0218.1	B0218.1a.5	1,19949	0,544934	2.20117	1.13827
B0218.1	B0218.1	B0218.1b.1	1,24146	0,555342	2.23549	1.16059
B0218.1	B0218.1	B0218.1b.2	1,25349	0,556046	2.25429	1.17267
B0218.1	B0218.1	B0218.1b.3	1,25752	0,555571	2.26347	1.17854
B0218.2	B0218.2	B0218.2.1	0,583794	0,323751	1.80322	0.850575
B0218.2	B0218.2	B0218.2.2	0,590955	0,315077	1.87559	0.907344
pmk-1	B0218.3	B0218.3	0,511633	0,219965	2.32597	1.21784
B0218.5	B0218.5	B0218.5	0,008668	0,000863	10.0435	3.3282	1
clec-51	B0218.6	B0218.6	0,614443	0,141875	4.33088	2.11466	1
B0218.7	B0218.7	B0218.7	0,02933	0,007787	3.76656	1.91325	1
clec-52	B0218.8	B0218.8	0,701226	0,491682	1.42618	0.512154
B0222.1	B0222.1	B0222.1	0,204002	0,057837	3.52719	1.81852	1
B0222.10	B0222.10	B0222.10	0,023571	0,001829	12.8875	3.6879	1
B0222.11	B0222.11	B0222.11	0,029771	0,009376	3.17528	1.66688
B0222.2	B0222.2	B0222.2	0,000878	0,000427	2.05701	1.04055
B0222.3	B0222.3	B0222.3	0,336464	0,278538	1.20796	0.272578
tag-38	B0222.4	B0222.4	0,099523	0,008011	12.4232	3.63497	1
B0222.5	B0222.5	B0222.5	0,264342	0,136505	1.9365	0.953452
col-144	B0222.6	B0222.6	4,5745	3,23824	1.41265	0.498404
col-145	B0222.7	B0222.7	0,050857	0,015318	3.3201	1.73123	1
col-10	B0222.8	B0222.8	11,1339	9,83506	1.13206	0.178953
B0222.9	B0222.9	B0222.9	0,252719	0,09216	2.74218	1.45532
B0228.1	B0228.1	B0228.1	0,252084	0,085118	2.96158	1.56637
tag-308	B0228.4	B0228.4a	0,41671	0,166815	2.49804	1.32079
tag-308	B0228.4	B0228.4b	0,148406	0,061213	2.42442	1.27764
tag-308	B0228.4	B0228.4c	0,19558	0,057854	3.38058	1.75727	1
tag-308	B0228.4	B0228.4d	0,365282	0,156994	2.32673	1.2183
tag-308	B0228.4	B0228.4e	0,307015	0,067638	4.53909	2.1824	1
trx-1	B0228.5	B0228.5a	0,030815	0,050006	0.616226	-0.698468
trx-1	B0228.5	B0228.5b	0,039746	0,051544	0.77111	-0.374991
B0228.6	B0228.6	B0228.6	0,138562	0,193092	0.717596	-0.478757
B0228.7	B0228.7	B0228.7.1	1,85882	1,00999	1.84043	0.880046
B0228.7	B0228.7	B0228.7.2	1,91658	0,99718	1.922	0.942608
B0228.8	B0228.8	B0228.8	0,000137	0
B0228.9	B0228.9	B0228.9	0,00043	0
B0238.1	B0238.1	B0238.1	0,135572	0,064849	2.09058	1.0639
B0238.10	B0238.10	B0238.10	4,01642	2,99656	1.34034	0.422603
B0238.11	B0238.11	B0238.11.1	2,23945	2,2108	1.01296	0.0185759
B0238.11	B0238.11	B0238.11.2	2,27308	1,87851	1.21004	0.27506
B0238.12	B0238.12	B0238.12	0,800643	0,121866	6.56986	2.71586	1
B0238.13	B0238.13	B0238.13	0,003983	0,000434	9.17797	3.19818	1
B0238.15	B0238.15	B0238.15	0,014506	0,081652	0.177656	-2.49284		1
srt-68	B0238.3	B0238.3	0	0
srt-67	B0238.5	B0238.5	0,000215	0
srt-70	B0238.6	B0238.6	0,000585	0
B0238.7	B0238.7	B0238.7	0,000463	0
srt-69	B0238.8	B0238.8	0	0,000453	0
B0238.9	B0238.9	B0238.9	1,60197	0,787653	2.03385	1.02422
rhr-2	B0240.1	B0240.1.1	0,115952	0,024585	4.71637	2.23768	1
rhr-2	B0240.1	B0240.1.2	0,120422	0,025607	4.7027	2.23349	1
spe-42	B0240.2	B0240.2	0,003102	0,000115	26.9763	4.75362	1
daf-11	B0240.3	B0240.3	0,011283	0,000639	17.6579	4.14224	1
npp-22	B0240.4	B0240.4.1	1,65261	0,854951	1.93299	0.950833
npp-22	B0240.4	B0240.4.2	1,54526	0,839245	1.84125	0.880686
B0244.10	B0244.10	B0244.10	0,070059	0,01968	3.55992	1.83184	1
B0244.11	B0244.11	B0244.11	0	0
ida-1	B0244.2	B0244.2.1	2,88025	0,983483	2.92862	1.55022
ida-1	B0244.2	B0244.2.2	2,88131	0,983648	2.92921	1.55051
B0244.4	B0244.4	B0244.4	0,006492	0
B0244.5	B0244.5	B0244.5	0,034842	0,009333	3.73318	1.90041	1
B0244.6	B0244.6	B0244.6	0,030544	0,022155	1.37864	0.463247
B0244.7	B0244.7	B0244.7	0,01057	0
egg-1	B0244.8	B0244.8	10,3801	4,25794	2.43782	1.28559
B0244.9	B0244.9	B0244.9	6,15414	2,74473	2.24217	1.16489
rpl-2	B0250.1	B0250.1.1	87,017	11,227	7.75069	2.95432	1
rpl-2	B0250.1	B0250.1.2	85,6013	11,4672	7.46488	2.90012	1
srbc-78	B0250.10	B0250.10	0	0
B0250.2	B0250.2	B0250.2	0,130277	0,122599	1.06263	0.0876352
B0250.4	B0250.4	B0250.4	0,08613	0,103002	0.8362	-0.25808
B0250.5	B0250.5	B0250.5	1,05429	0,68797	1.53247	0.615854
srbc-79	B0250.6	B0250.6	0,000226	0
B0250.8	B0250.8	B0250.8	0,021174	0,01523	1.39032	0.475412
B0250.9	B0250.9	B0250.9	10,1321	0,288908	35.0703	5.13218	1
B0252.1	B0252.1	B0252.1	0,068291	0,033217	2.0559	1.03977
asm-1	B0252.2	B0252.2	0,178521	0,063682	2.80332	1.48714
B0252.3	B0252.3	B0252.3a	0,179459	0,079729	2.25086	1.17048
B0252.3	B0252.3	B0252.3b	0,211393	0,125251	1.68775	0.755105
B0252.3	B0252.3	B0252.3c.1	0,179426	0,079798	2.2485	1.16896
B0252.3	B0252.3	B0252.3c.2	0,179459	0,079729	2.25086	1.17048
cyn-10	B0252.4	B0252.4a	1,86425	2,80926	0.663609	-0.591595
cyn-10	B0252.4	B0252.4b	0,943011	0,828991	1.13754	0.185918
B0252.5	B0252.5	B0252.5	0,028262	0,005955	4.74594	2.2467	1
B0252.8	B0252.8	B0252.8	0,651461	0,686044	0.949591	-0.0746223
B0261.1	B0261.1	B0261.1.1	0,866709	0,50206	1.72631	0.787688
B0261.1	B0261.1	B0261.1.2	0,897875	0,509772	1.76133	0.816662
let-363	B0261.2	B0261.2a	0,883403	0,41521	2.12761	1.08923
let-363	B0261.2	B0261.2b	0,873582	0,407719	2.14261	1.09937
B0261.4	B0261.4	B0261.4a	1,27019	1,10655	1.14788	0.198976
B0261.4	B0261.4	B0261.4b	1,3558	0,956593	1.41732	0.503167
B0261.5	B0261.5	B0261.5	0,00039	0,012341	0.0316321	-4.98247		1
B0261.6	B0261.6	B0261.6a	0,072096	0,023012	3.13297	1.64753
B0261.6	B0261.6	B0261.6b	0,073832	0,021754	3.39396	1.76297	1
B0261.7	B0261.7	B0261.7	2,52337	1,47269	1.71344	0.776898
B0261.8	B0261.8	B0261.8	0,263893	0,399426	0.660681	-0.597975
tbb-4	B0272.1	B0272.1	0,273566	0,181104	1.51055	0.595071
B0272.2	B0272.2	B0272.2	0,296736	0,282829	1.04917	0.0692499
B0272.3	B0272.3	B0272.3	2,33493	1,23373	1.89258	0.920353
B0272.4	B0272.4	B0272.4	0,375024	0,181119	2.07059	1.05005
B0273.1	B0273.1	B0273.1	0,049322	0,103507	0.476509	-1.06943
puf-7	B0273.2	B0273.2.1	2,41538	0,859658	2.8097	1.49042
puf-7	B0273.2	B0273.2.2	2,33426	1,01767	2.29373	1.1977
B0273.3	B0273.3	B0273.3	0,231573	0,154319	1.50061	0.585551
unc-5	B0273.4	B0273.4a	0,358592	0,181519	1.97551	0.982223
unc-5	B0273.4	B0273.4b	0,338958	0,180786	1.87491	0.906824
B0280.10	B0280.10	B0280.10	0,311063	0,244036	1.27466	0.350113
B0280.11	B0280.11	B0280.11	0,002826	0,000716	3.94712	1.9808	1
glr-2	B0280.12	B0280.12a	0,029209	0,007316	3.99244	1.99727	1
glr-2	B0280.12	B0280.12b	0,028628	0,006804	4.20758	2.07299	1
B0280.13	B0280.13	B0280.13	0,186912	0,056325	3.31846	1.73051	1
B0280.17	B0280.17	B0280.17	0,119352	0,040136	2.97369	1.57225
B0280.1	B0280.1	B0280.1a	1,37766	0,702176	1.96199	0.972315
B0280.1	B0280.1	B0280.1b	1,53104	0,744871	2.05544	1.03945
B0280.2	B0280.2	B0280.2	0,019857	0,007494	2.64968	1.40582
B0280.3	B0280.3	B0280.3.1	2,16009	1,072	2.01501	1.01079
B0280.3	B0280.3	B0280.3.2	2,08769	0,988267	2.11248	1.07893
B0280.3	B0280.3	B0280.3.3	2,01977	0,961168	2.10137	1.07133
odd-1	B0280.4	B0280.4	0,047149	0,031733	1.4858	0.571237
cpg-2	B0280.5	B0280.5.1	44,4599	17,1284	2.59568	1.37611
cpg-2	B0280.5	B0280.5.2	44,4713	17,1044	2.59999	1.37851
B0280.7	B0280.7	B0280.7	0,032524	0,004868	6.68114	2.74009	1
nhr-10	B0280.8	B0280.8	0,492842	0,268803	1.83347	0.874576
B0280.9	B0280.9	B0280.9	1,09523	0,910551	1.20282	0.266422
B0281.1	B0281.1	B0281.1	0,007229	0,002314	3.124	1.6434
B0281.3	B0281.3	B0281.3	0,209711	0,22762	0.921321	-0.118225
B0281.4	B0281.4	B0281.4	0,038384	0,01646	2.33198	1.22156
B0281.5	B0281.5	B0281.5	0,167043	0,199844	0.835867	-0.258655
B0281.6	B0281.6	B0281.6	0,007394	0,003005	2.4606	1.29901
B0281.8	B0281.8	B0281.8	0	0
B0284.1	B0284.1	B0284.1	0,103951	0,042064	2.47126	1.30525
B0284.2	B0284.2	B0284.2	0,029803	0,013663	2.18126	1.12516
B0284.3	B0284.3	B0284.3	0,626532	4,70982	0.133027	-2.91021		1
B0284.4	B0284.4	B0284.4	0,004194	0
B0285.1	B0285.1	B0285.1	1,0252	0,764974	1.34018	0.422423
ckb-3	B0285.10	B0285.10	0,001514	0,002397	0.631439	-0.663284
B0285.3	B0285.3	B0285.3	1,63123	1,77995	0.916447	-0.125877
B0285.4	B0285.4	B0285.4	0,630313	0,584884	1.07767	0.107918
hse-5	B0285.5	B0285.5	0,706352	0,473646	1.49131	0.576578
B0285.6	B0285.6	B0285.6	0,02875	0,006663	4.3149	2.10933	1
B0285.7	B0285.7	B0285.7	0,307619	0,175299	1.75482	0.811327
ckb-1	B0285.8	B0285.8	0,086738	0,054535	1.59051	0.669485
ckb-2	B0285.9	B0285.9	0,128904	0,073582	1.75184	0.808872
B0286.1	B0286.1	B0286.1	0,358382	0,312338	1.14742	0.19839
lat-2	B0286.2	B0286.2a	0,066099	0,012604	5.2443	2.39075	1
lat-2	B0286.2	B0286.2b	0,087395	0,020616	4.23918	2.08378	1
B0286.3	B0286.3	B0286.3	0,533369	0,316661	1.68435	0.752195
ntl-2	B0286.4	B0286.4a.1	1,9678	1,84627	1.06582	0.09197
ntl-2	B0286.4	B0286.4a.2	1,91116	1,3373	1.42912	0.515125
ntl-2	B0286.4	B0286.4b	2,09469	1,1206	1.86926	0.902465
ntl-2	B0286.4	B0286.4c.1	2,09508	1,12379	1.8643	0.898633
ntl-2	B0286.4	B0286.4c.2	1,98836	1,7681	1.12457	0.169379
ntl-2	B0286.4	B0286.4c.3	1,91116	1,3373	1.42912	0.515125
ntl-2	B0286.4	B0286.4c.4	1,94971	1,17503	1.65929	0.730562
ntl-2	B0286.4	B0286.4c.5	1,89039	1,27572	1.48182	0.567372
ntl-2	B0286.4	B0286.4d.1	1,8437	1,33082	1.38539	0.470288
ntl-2	B0286.4	B0286.4d.2	1,84012	1,73251	1.06211	0.0869362
ntl-2	B0286.4	B0286.4d.3	1,88502	1,11667	1.68807	0.755377
ntl-2	B0286.4	B0286.4d.4	1,89792	1,15754	1.63962	0.713357
ntl-2	B0286.4	B0286.4d.5	1,91116	1,3373	1.42912	0.515125
fkh-6	B0286.5	B0286.5	0,105945	0,12457	0.850486	-0.233641
B0286.6	B0286.6	B0286.6	0,017205	0,007869	2.18638	1.12854
B0294.1	B0294.1	B0294.1	0,235665	0,037307	6.31691	2.65922	1
B0294.3	B0294.3	B0294.3	0,03644	0,005743	6.3451	2.66564	1
kin-25	B0302.1	B0302.1a	0,504174	0,39787	1.26718	0.341625
kin-25	B0302.1	B0302.1b	0,540841	0,427042	1.26648	0.340827
kin-25	B0302.1	B0302.1c	0,684252	0,468077	1.46184	0.547782
B0302.2	B0302.2	B0302.2	0,000819	0,001081	0.757463	-0.400754
B0302.4	B0302.4	B0302.4	0	0
B0302.5	B0302.5	B0302.5	0,843072	0,91728	0.9191	-0.121706
B0303.11	B0303.11	B0303.11	0,391862	0,14241	2.75165	1.4603
B0303.14	B0303.14	B0303.14	0,100872	0,069893	1.44323	0.529306
B0303.15	B0303.15	B0303.15	1,21759	1,51571	0.803313	-0.315965
B0303.16	B0303.16	B0303.16	0,00034	0
B0303.2	B0303.2	B0303.2	0,117841	0,105058	1.12168	0.165656
B0303.3	B0303.3	B0303.3.1	3,39807	1,48225	2.29251	1.19693
B0303.3	B0303.3	B0303.3.2	3,38745	1,49611	2.26417	1.17898
B0303.3	B0303.3	B0303.3.3	3,6527	1,63462	2.23459	1.16001
B0303.4	B0303.4	B0303.4.1	1,31852	0,675939	1.95065	0.963954
B0303.4	B0303.4	B0303.4.2	1,53279	0,748714	2.04723	1.03367
B0303.7	B0303.7	B0303.7	0,490984	0,317728	1.5453	0.627884
sdz-1	B0303.8	B0303.8	0,001133	0,000691	1.63967	0.713403
B0303.9	B0303.9	B0303.9	0,48373	0,197991	2.44319	1.28877
hlh-1	B0304.1	B0304.1a	0,189586	0,14869	1.27504	0.350545
hlh-1	B0304.1	B0304.1b	0,187201	0,145691	1.28492	0.361676
hlh-1	B0304.1	B0304.1c	0,190991	0,14916	1.28044	0.356644
B0304.2	B0304.2	B0304.2	1,24106	0,818213	1.51679	0.601025
cyp-23A1	B0304.3	B0304.3	0,015845	0,004084	3.8797	1.95595	1
B0304.4	B0304.4	B0304.4	0,755738	0,686564	1.10075	0.138492
sra-32	B0304.5	B0304.5	0,010267	0,014962	0.686172	-0.543359
sra-33	B0304.6	B0304.6	0,004089	0,003137	1.30345	0.382334
sra-34	B0304.7	B0304.7	0,006819	0,000331	20.6018	4.3647	1
sra-35	B0304.8	B0304.8	0,001441	0,001838	0.784053	-0.350976
sra-36	B0304.9	B0304.9	0,000281	0,003434	0.0818229	-3.61135		1
B0310.1	B0310.1	B0310.1	0,136056	0,067003	2.0306	1.0219
B0310.2	B0310.2	B0310.2.1	0,183194	0,123348	1.48518	0.570638
B0310.2	B0310.2	B0310.2.2	0,20532	0,129694	1.58311	0.662762
B0310.3	B0310.3	B0310.3	0,013423	0,012016	1.11706	0.159707
B0310.4	B0310.4	B0310.4	0	0
ugt-46	B0310.5	B0310.5	0,21192	0,117514	1.80336	0.850687
B0310.6	B0310.6	B0310.6	0,02838	0,020824	1.36286	0.446638
cyp-29A4	B0331.1	B0331.1	0,011849	0,010413	1.13789	0.186355
B0331.2	B0331.2	B0331.2	0,019994	0,004752	4.20755	2.07298	1
B0334.1	B0334.1	B0334.1.1	3,68127	5,60115	0.657235	-0.605519
B0334.1	B0334.1	B0334.1.2	2,91656	5,35697	0.544442	-0.877149
B0334.10	B0334.10	B0334.10	0,006708	0,010077	0.665665	-0.587131
ooc-3	B0334.11	B0334.11a	0,792572	0,502588	1.57698	0.657166
ooc-3	B0334.11	B0334.11b	0,704227	0,426594	1.65081	0.723177
B0334.13	B0334.13	B0334.13	0,05584	0,049236	1.13414	0.181596
twk-5	B0334.2	B0334.2a	0,307071	0,249243	1.23201	0.301019
twk-5	B0334.2	B0334.2b	0,340104	0,2642	1.2873	0.364346
B0334.3	B0334.3	B0334.3a.1	3,77904	2,66609	1.41745	0.503294
B0334.3	B0334.3	B0334.3a.2	3,73751	2,54743	1.46717	0.553035
B0334.3	B0334.3	B0334.3b	3,48304	2,38921	1.45782	0.543813
B0334.4	B0334.4	B0334.4	2,41201	1,55972	1.54644	0.628949
B0334.5	B0334.5	B0334.5	1,63707	1,08479	1.50911	0.5937
B0334.6	B0334.6	B0334.6	0,059033	0,023555	2.50617	1.32549
srh-44	B0334.7	B0334.7	0,006558	0
age-1	B0334.8	B0334.8	0,859826	0,348368	2.46815	1.30343
wrm-1	B0336.1	B0336.1.1	1,06814	0,490335	2.17839	1.12326
wrm-1	B0336.1	B0336.1.2	1,04214	0,496149	2.10046	1.0707
rpl-23	B0336.10	B0336.10.1	93,8419	73,6683	1.27384	0.349188
rpl-23	B0336.10	B0336.10.2	96,2491	73,9001	1.30242	0.381197
rpl-23	B0336.10	B0336.10.3	74,9038	63,4689	1.18017	0.238989
rpl-23	B0336.10	B0336.10.4	74,7362	63,5482	1.17606	0.233956
B0336.11	B0336.11	B0336.11a	0,217649	0,10396	2.09358	1.06597
B0336.11	B0336.11	B0336.11b	0,117205	0,045024	2.60317	1.38027
B0336.12	B0336.12	B0336.12	0,003542	0,002446	1.44822	0.534278
B0336.13	B0336.13	B0336.13	1,04829	1,76883	0.592646	-0.754758
arf-1.2	B0336.2	B0336.2.1	6,00691	4,9075	1.22403	0.291635
arf-1.2	B0336.2	B0336.2.2	8,64348	5,75899	1.50087	0.585796
B0336.3	B0336.3	B0336.3	1,71434	1,13553	1.50973	0.594287
rgs-5	B0336.4	B0336.4	0,150243	0,125376	1.19834	0.261037
B0336.5	B0336.5	B0336.5a	1,02032	0,711655	1.43373	0.519772
B0336.5	B0336.5	B0336.5b	1,26075	0,737365	1.7098	0.773831
B0336.6	B0336.6	B0336.6.1	3,50172	1,5954	2.19489	1.13415
B0336.6	B0336.6	B0336.6.2	3,56689	1,63222	2.1853	1.12783
B0336.7	B0336.7	B0336.7a	0,472065	0,30551	1.54517	0.627766
B0336.7	B0336.7	B0336.7b.1	0,467428	0,309464	1.51044	0.594973
B0336.7	B0336.7	B0336.7b.2	0,465616	0,308518	1.5092	0.593786
lgg-3	B0336.8	B0336.8	1,81073	4,0509	0.446994	-1.16167
swp-1	B0336.9	B0336.9a	0,564839	0,408924	1.38128	0.466007
swp-1	B0336.9	B0336.9b.1	0,501624	0,376793	1.3313	0.412834
swp-1	B0336.9	B0336.9b.2	0,565831	0,411876	1.37379	0.458161
swp-1	B0336.9	B0336.9c	0,035401	0,027051	1.30868	0.388116
swp-1	B0336.9	B0336.9d	0,565818	0,411741	1.37421	0.458601
swp-1	B0336.9	B0336.9e	0,422375	0,241896	1.7461	0.804138
wrt-9	B0344.2	B0344.2	0,08901	0,024651	3.61079	1.85231	1
B0348.1	B0348.1	B0348.1	0	0
B0348.2	B0348.2	B0348.2	0,071385	0,205832	0.346811	-1.52778		1
egl-8	B0348.4	B0348.4a	0,736516	0,403278	1.82632	0.868942
egl-8	B0348.4	B0348.4b	0,730889	0,40076	1.82376	0.866914
egl-8	B0348.4	B0348.4c	0,539729	0,313901	1.71942	0.781926
B0348.5	B0348.5	B0348.5	0,037996	0,004642	8.18526	3.03303	1
ife-3	B0348.6	B0348.6a.1	8,19453	5,19255	1.57813	0.658218
ife-3	B0348.6	B0348.6a.2	9,29528	4,45864	2.08478	1.05989
ife-3	B0348.6	B0348.6b	11,1489	3,46023	3.22201	1.68796
ife-3	B0348.6	B0348.6c	11,1877	3,42831	3.26333	1.70634	1
unc-44	B0350.2	B0350.2a.1	2,386	1,68966	1.41212	0.497861
unc-44	B0350.2	B0350.2a.2	2,29883	1,62664	1.41324	0.499005
unc-44	B0350.2	B0350.2b.1	3,22798	1,76564	1.82822	0.87044
unc-44	B0350.2	B0350.2b.2	3,13544	1,72341	1.81932	0.863402
unc-44	B0350.2	B0350.2c.1	2,60451	1,64783	1.58057	0.660445
unc-44	B0350.2	B0350.2c.2	2,50976	1,57838	1.59009	0.669105
unc-44	B0350.2	B0350.2d.1	3,0396	1,74054	1.74635	0.804347
unc-44	B0350.2	B0350.2d.2	3,13544	1,72341	1.81932	0.863402
unc-44	B0350.2	B0350.2d.3	3,2265	1,80027	1.79223	0.841757
unc-44	B0350.2	B0350.2e.1	2,59331	1,63532	1.58581	0.665222
unc-44	B0350.2	B0350.2e.2	2,49334	1,56654	1.59162	0.670498
unc-44	B0350.2	B0350.2f.1	1,11333	0,585129	1.90271	0.928055
unc-44	B0350.2	B0350.2f.2	1,1354	0,601773	1.88676	0.915909
unc-44	B0350.2	B0350.2g.1	1,94298	1,42301	1.3654	0.449325
unc-44	B0350.2	B0350.2g.2	1,83919	1,39303	1.32028	0.400844
B0350.3	B0350.3	B0350.3	0	0
B0353.1	B0353.1	B0353.1	0,73182	0,792323	0.923638	-0.1146
B0361.10	B0361.10	B0361.10	1,43284	1,08693	1.31824	0.398618
B0361.11	B0361.11	B0361.11	0,004711	0,001179	3.99598	1.99855	1
B0361.2	B0361.2	B0361.2a	0,518569	0,385094	1.3466	0.429325
B0361.2	B0361.2	B0361.2b	0,281096	0,251406	1.1181	0.161044
B0361.3	B0361.3	B0361.3.1	0,495905	0,347492	1.4271	0.513084
B0361.3	B0361.3	B0361.3.2	0,48965	0,332184	1.47403	0.559768
B0361.4	B0361.4	B0361.4	0,474808	0,275667	1.7224	0.784418
psd-1	B0361.5	B0361.5a	2,5278	1,15326	2.19187	1.13216
psd-1	B0361.5	B0361.5b	2,44143	1,3063	1.86897	0.90224
B0361.6	B0361.6	B0361.6	0,774121	0,445453	1.73783	0.797286
B0361.7	B0361.7	B0361.7	0,688056	0,341654	2.0139	1.00999
B0361.8	B0361.8	B0361.8.1	1,7887	0,789801	2.26475	1.17935
B0361.8	B0361.8	B0361.8.2	1,8853	0,827916	2.27716	1.18724
B0361.9	B0361.9	B0361.9	2,24575	1,65716	1.35518	0.438484
B0365.1	B0365.1	B0365.1	3,1072	1,27499	2.43704	1.28513
eat-6	B0365.3	B0365.3.1	19,5302	6,39929	3.05193	1.60972
eat-6	B0365.3	B0365.3.2	19,9838	6,53796	3.05658	1.61192
eat-6	B0365.3	B0365.3.3	19,5694	6,40533	3.05517	1.61125
B0365.5	B0365.5	B0365.5a	0,130308	0,091631	1.4221	0.508018
B0365.5	B0365.5	B0365.5b	0,134224	0,043929	3.05548	1.6114
clec-41	B0365.6	B0365.6.1	0,863781	0,562323	1.53609	0.619267
clec-41	B0365.6	B0365.6.2	0,863781	0,562323	1.53609	0.619267
clec-41	B0365.6	B0365.6.3	0,863781	0,562323	1.53609	0.619267
B0365.7	B0365.7	B0365.7	0,003718	0,000251	14.8112	3.88862	1
B0379.1	B0379.1	B0379.1	0,937992	1,15846	0.809689	-0.304561
B0379.2	B0379.2	B0379.2	0,007727	0
mut-16	B0379.3	B0379.3a	1,39342	1,01126	1.3779	0.462476
mut-16	B0379.3	B0379.3b	1,38737	0,973198	1.42558	0.511547
tag-188	B0379.4	B0379.4a	2,2292	1,1793	1.89027	0.918595
tag-188	B0379.4	B0379.4b	1,49847	0,770187	1.94559	0.96021
B0379.6	B0379.6	B0379.6	0,004253	0
B0379.7	B0379.7	B0379.7.1	0,019168	0,005779	3.31685	1.72982	1
B0379.7	B0379.7	B0379.7.2	0,019337	0,005387	3.58959	1.84382	1
B0391.10	B0391.10	B0391.10	0,150734	0,118247	1.27474	0.350201
B0391.11	B0391.11	B0391.11	0,024014	0,010669	2.25084	1.17046
str-263	B0391.12	B0391.12	0	0
B0391.3	B0391.3	B0391.3	0	0
str-12	B0391.4	B0391.4	0,001441	0
B0391.5	B0391.5	B0391.5	0,082681	0,12606	0.655889	-0.608476
B0391.6	B0391.6	B0391.6	0,003577	0,002944	1.21513	0.281114
B0391.9	B0391.9	B0391.9	0,018079	0,027376	0.660414	-0.598557
rps-0	B0393.1	B0393.1.1	139,22	68,5142	2.03199	1.02289
rps-0	B0393.1	B0393.1.2	142,292	68,3826	2.08082	1.05715
rps-0	B0393.1	B0393.1.3	141,843	68,1834	2.08032	1.0568
rps-0	B0393.1	B0393.1.4	142,068	68,2831	2.08057	1.05698
rbg-3	B0393.2	B0393.2.1	1,79474	0,971473	1.84744	0.885529
rbg-3	B0393.2	B0393.2.2	1,81932	0,949077	1.91694	0.938802
B0393.3	B0393.3	B0393.3	1,53977	1,32623	1.16101	0.215384
B0393.4	B0393.4	B0393.4	0,009463	0,000733	12.91	3.69042	1
B0393.5	B0393.5	B0393.5	0,116244	0,018641	6.23593	2.64061	1
B0393.6	B0393.6	B0393.6	2,56655	1,2615	2.03452	1.02469
B0393.7	B0393.7	B0393.7	0,029309	0,00801	3.65908	1.87148	1
B0393.8	B0393.8	B0393.8	nan	nan
B0393.9	B0393.9	B0393.9.1	0,508167	0,327622	1.55108	0.63327
B0393.9	B0393.9	B0393.9.2	0,579182	0,344215	1.68262	0.750707
nhx-1	B0395.1	B0395.1	0,058013	0,018556	3.12635	1.64448
B0395.2	B0395.2	B0395.2	0,086788	0,022281	3.89515	1.96168	1
B0395.3	B0395.3	B0395.3.1	0,909843	0,615768	1.47757	0.563231
B0395.3	B0395.3	B0395.3.2	0,953027	0,634352	1.50236	0.587233
B0399.1	B0399.1	B0399.1a	0,339074	0,15347	2.20938	1.14364
B0399.1	B0399.1	B0399.1b	0,383268	0,162383	2.36027	1.23895
B0399.1	B0399.1	B0399.1c	0,463605	0,193386	2.3973	1.26141
B0399.1	B0399.1	B0399.1d	0,367251	0,157882	2.32611	1.21792
B0399.1	B0399.1	B0399.1e	0,391623	0,170036	2.30318	1.20363
B0399.2	B0399.2	B0399.2	0,023797	0,020437	1.16439	0.219578
ubc-17	B0403.2	B0403.2	0,036636	0,016549	2.2138	1.14653
B0403.3	B0403.3	B0403.3	0,287343	0,188793	1.522	0.605969
tag-320	B0403.4	B0403.4	4,25405	3,31294	1.28407	0.360725
B0403.5	B0403.5	B0403.5	0,067167	0,02813	2.38773	1.25564
B0403.6	B0403.6	B0403.6	0,072332	0,047972	1.50779	0.592435
B0410.1	B0410.1	B0410.1	0	0
vang-1	B0410.2	B0410.2a	0,257247	0,239025	1.07623	0.105993
vang-1	B0410.2	B0410.2b	0,240219	0,227022	1.05813	0.0815182
B0410.3	B0410.3	B0410.3	0,604936	0,356707	1.69589	0.762043
dac-1	B0412.1	B0412.1a	0,045112	0,012996	3.47124	1.79545	1
dac-1	B0412.1	B0412.1b	0,043521	0,011728	3.71085	1.89175	1
daf-7	B0412.2	B0412.2	0,499663	0,030587	16.3358	4.02996	1
B0412.3	B0412.3	B0412.3.1	0,869937	0,500925	1.73666	0.796316
B0412.3	B0412.3	B0412.3.2	0,884267	0,508433	1.7392	0.798424
rps-29	B0412.4	B0412.4.1	115,747	376,881	0.307118	-1.70313		1
rps-29	B0412.4	B0412.4.2	136,617	435,546	0.313668	-1.67269		1
rps-29	B0412.4	B0412.4.3	137,017	441,323	0.310469	-1.68748		1
rps-29	B0412.4	B0412.4.4	118,749	378,124	0.314048	-1.67094		1
srz-4	B0414.1	B0414.1	0	0,001683	0
rnt-1	B0414.2	B0414.2	0,038734	0,043328	0.893962	-0.161714
hil-5	B0414.3	B0414.3	9,33793	11,9012	0.784621	-0.349932
cpb-3	B0414.5	B0414.5	1,42063	0,811957	1.74964	0.807056
glh-3	B0414.6	B0414.6	0,686782	0,303599	2.26214	1.17769
mtk-1	B0414.7	B0414.7a	0,673726	0,374822	1.79746	0.845956
mtk-1	B0414.7	B0414.7b	0,678229	0,371325	1.82651	0.86909
B0414.8	B0414.8	B0414.8a	0,607745	0,283259	2.14555	1.10134
B0414.8	B0414.8	B0414.8b	0,602532	0,280594	2.14734	1.10255
B0416.1	B0416.1	B0416.1	0,105725	0,044232	2.39024	1.25715
B0416.2	B0416.2	B0416.2	0,029835	0,015286	1.95177	0.96478
B0416.3	B0416.3	B0416.3	0,059003	0,064668	0.912397	-0.132266
B0416.4	B0416.4	B0416.4	0,242947	0,281415	0.863305	-0.212058
B0416.5	B0416.5	B0416.5a.1	3,16368	1,98405	1.59456	0.673155
B0416.5	B0416.5	B0416.5a.2	3,31814	2,01474	1.64693	0.719781
B0416.5	B0416.5	B0416.5b	3,96913	2,29026	1.73305	0.793311
gly-13	B0416.6	B0416.6	0,507038	0,348261	1.45591	0.541925
B0416.7	B0416.7	B0416.7a	0,358772	0,296293	1.21087	0.276043
B0416.7	B0416.7	B0416.7b	0,174593	0,152633	1.14387	0.193929
B0432.1	B0432.1	B0432.1	0,023644	0,001119	21.1295	4.40119	1
B0432.10	B0432.10	B0432.10	0,166343	0,219073	0.759304	-0.397251
B0432.11	B0432.11	B0432.11	0	0
B0432.12	B0432.12	B0432.12	0,022266	0
B0432.13	B0432.13	B0432.13.1	0,285909	0,246348	1.16059	0.214858
B0432.13	B0432.13	B0432.13.2	0,293603	0,234507	1.252	0.324236
B0432.14	B0432.14	B0432.14	0,760255	0,702515	1.08219	0.113954
djr-1.1	B0432.2	B0432.2	2,26878	1,57999	1.43595	0.522001
B0432.3	B0432.3	B0432.3	1,26106	1,21253	1.04002	0.0566165
B0432.4	B0432.4	B0432.4	1,75156	1,06156	1.64999	0.722454
cat-2	B0432.5	B0432.5a	0,026221	0,004533	5.78438	2.53216	1
cat-2	B0432.5	B0432.5b	0,031925	0,004679	6.82302	2.77041	1
B0432.6	B0432.6	B0432.6	0,276059	0,151043	1.82768	0.870017
B0432.7	B0432.7	B0432.7	0,207353	0,137478	1.50826	0.592888
B0432.8	B0432.8	B0432.8	0,463845	0,223981	2.07091	1.05027
B0432.9	B0432.9	B0432.9	0,040888	0,056745	0.720553	-0.472823
lin-8	B0454.1	B0454.1	0,210733	0,229961	0.916386	-0.125973
sri-30	B0454.10	B0454.10	0,030147	0,025387	1.18749	0.24791
sri-31	B0454.2	B0454.2	0,007461	0,005986	1.24645	0.317827
sri-28	B0454.3	B0454.3	0,0022	0
sri-29	B0454.4	B0454.4	0,017334	0,026548	0.652919	-0.615024
B0454.5	B0454.5	B0454.5	0,20053	0,368266	0.544525	-0.87693
B0454.6	B0454.6	B0454.6	0,416041	0,082847	5.0218	2.3282	1
clec-2	B0454.7	B0454.7	0,018162	0,001139	15.9451	3.99504	1
B0454.8	B0454.8	B0454.8	0,05724	0,004841	11.8239	3.56364	1
B0454.9	B0454.9	B0454.9	0,314178	0,286607	1.0962	0.132508
lat-1	B0457.1	B0457.1a	2,66799	1,19066	2.24077	1.16399
lat-1	B0457.1	B0457.1b	2,59611	1,14529	2.26677	1.18064
lat-1	B0457.1	B0457.1c	2,68713	1,33843	2.00767	1.00552
B0457.2	B0457.2	B0457.2	0,802625	0,334023	2.4029	1.26478
B0457.4	B0457.4	B0457.4	0,000547	0
B0457.6	B0457.6	B0457.6	0,805512	1,77951	0.452659	-1.1435
B0462.1	B0462.1	B0462.1	0,012451	0,002543	4.89615	2.29165	1
fbxb-119	B0462.3	B0462.3	0,0068	0,022148	0.307027	-1.70356		1
B0462.4	B0462.4	B0462.4	0,001691	0,004426	0.382149	-1.38779
drs-1	B0464.1	B0464.1.1	5,92844	2,77387	2.13725	1.09575
drs-1	B0464.1	B0464.1.2	5,46598	2,66005	2.05484	1.03903
B0464.2	B0464.2	B0464.2	1,28434	0,672242	1.91053	0.933975
nlp-36	B0464.3	B0464.3.1	5,75017	32,3229	0.177898	-2.49088		1
nlp-36	B0464.3	B0464.3.2	5,61893	31,3378	0.179302	-2.47954		1
bre-3	B0464.4	B0464.4.1	1,75836	0,828594	2.1221	1.08549
bre-3	B0464.4	B0464.4.2	2,03184	1,00617	2.01938	1.01391
spk-1	B0464.5	B0464.5a	2,33305	1,19768	1.94797	0.961975
spk-1	B0464.5	B0464.5b.1	3,58148	2,41575	1.48255	0.568085
spk-1	B0464.5	B0464.5b.2	3,65647	1,89733	1.92717	0.946481
spk-1	B0464.5	B0464.5c.1	3,41202	2,25706	1.51171	0.596181
spk-1	B0464.5	B0464.5c.2	3,51541	1,88617	1.86378	0.898233
B0464.6	B0464.6	B0464.6.1	1,47238	0,873813	1.68501	0.752754
B0464.6	B0464.6	B0464.6.2	1,43313	0,872263	1.643	0.716334
B0464.6	B0464.6	B0464.6.3	1,6302	1,20542	1.35239	0.435513
baf-1	B0464.7	B0464.7.1	2,9893	7,24465	0.412622	-1.27711
baf-1	B0464.7	B0464.7.2	4,05526	9,13388	0.44398	-1.17143
tag-342	B0464.8	B0464.8	0,505279	0,369511	1.36743	0.451463
B0464.9	B0464.9	B0464.9	0,722734	0,494765	1.46076	0.546721
jnk-1	B0478.1	B0478.1a	0,196952	0,06386	3.08412	1.62486
jnk-1	B0478.1	B0478.1b.1	0,162759	0,053596	3.03678	1.60254
jnk-1	B0478.1	B0478.1b.2	0,162656	0,053534	3.03837	1.6033
jnk-1	B0478.1	B0478.1b.3	0,196952	0,06386	3.08412	1.62486
jnk-1	B0478.1	B0478.1b.4	0,162347	0,05335	3.04306	1.60552
B0478.3	B0478.3	B0478.3	0,06249	0,022524	2.77437	1.47216
B0491.1	B0491.1	B0491.1	0,739088	0,475808	1.55333	0.635367
sqt-1	B0491.2	B0491.2.1	0,340072	0,43791	0.77658	-0.364794
sqt-1	B0491.2	B0491.2.2	0,33842	0,437957	0.772724	-0.371974
sqt-1	B0491.2	B0491.2.3	0,332954	0,441702	0.753798	-0.40775
B0491.3	B0491.3	B0491.3	0,054121	0,038929	1.39025	0.475349
B0491.4	B0491.4	B0491.4	0,084453	0,016127	5.23673	2.38867	1
B0491.5	B0491.5	B0491.5.1	6,7398	3,44023	1.95911	0.970201
B0491.5	B0491.5	B0491.5.2	6,70818	3,41924	1.96189	0.972246
B0491.5	B0491.5	B0491.5.3	5,89981	3,05979	1.92817	0.947236
B0491.5	B0491.5	B0491.5.4	5,93748	3,07621	1.93013	0.948697
B0491.6	B0491.6	B0491.6.1	0,410925	0,390897	1.05124	0.0720866
B0491.6	B0491.6	B0491.6.2	0,406229	0,381053	1.06607	0.0923016
B0491.7	B0491.7	B0491.7	0,479473	0,39469	1.21481	0.28073
clh-2	B0491.8	B0491.8a	0,11642	0,033764	3.44805	1.78578	1
clh-2	B0491.8	B0491.8b	0,117211	0,033179	3.53269	1.82077	1
clh-2	B0491.8	B0491.8c	0,115881	0,035201	3.29198	1.71896	1
sre-1	B0495.1	B0495.1	0,007204	0,000331	21.763	4.44381	1
tag-178	B0495.10	B0495.10a	0,245687	0,109507	2.24357	1.1658
tag-178	B0495.10	B0495.10b	0,224349	0,088552	2.53353	1.34115
tag-178	B0495.10	B0495.10c	0,239713	0,104264	2.2991	1.20107
B0495.2	B0495.2	B0495.2	0,743635	0,519473	1.43152	0.517546
nhx-2	B0495.4	B0495.4	0,544788	0,153704	3.5444	1.82554	1
B0495.5	B0495.5	B0495.5.1	0,443465	0,31469	1.40921	0.494889
B0495.5	B0495.5	B0495.5.2	0,449208	0,31847	1.41052	0.496226
B0495.6	B0495.6	B0495.6	3,85379	13,3073	0.2896	-1.78787		1
B0495.7	B0495.7	B0495.7.1	2,03768	0,949449	2.14617	1.10177
B0495.7	B0495.7	B0495.7.2	2,11129	0,953824	2.2135	1.14633
B0495.8	B0495.8	B0495.8a	1,06136	0,852805	1.24455	0.315626
B0495.8	B0495.8	B0495.8b	1,23373	0,918239	1.34358	0.426085
B0495.9	B0495.9	B0495.9	0,67267	0,625599	1.07524	0.104661
B0496.1	B0496.1	B0496.1	0,001972	0
B0496.2	B0496.2	B0496.2	0,004293	0,00034	12.6254	3.65825	1
B0496.3	B0496.3	B0496.3a	0,393192	0,149381	2.63214	1.39624
B0496.3	B0496.3	B0496.3b	0,376182	0,144459	2.60407	1.38077
B0496.3	B0496.3	B0496.3c	0,536352	0,193096	2.77764	1.47386
B0496.4	B0496.4	B0496.4	0,035115	0,013536	2.59417	1.37527
B0496.5	B0496.5	B0496.5	0,016988	0
B0496.6	B0496.6	B0496.6	0	0,001394	0
B0496.7	B0496.7	B0496.7	0,737433	3,78573	0.194793	-2.35999		1
tag-224	B0496.8	B0496.8	0,439586	0,282903	1.55384	0.635838
B0507.1	B0507.1	B0507.1	0,159743	0,044315	3.60472	1.84989	1
B0507.10	B0507.10	B0507.10	0,143615	0,069942	2.05334	1.03798
srx-115	B0507.11	B0507.11	0,012058	0,001931	6.24423	2.64252	1
B0507.2	B0507.2	B0507.2	0,856121	0,512665	1.66994	0.739798
B0507.3	B0507.3	B0507.3a	0,28747	0,221032	1.30058	0.379156
B0507.3	B0507.3	B0507.3b	0,319588	0,222789	1.43449	0.520535
B0507.4	B0507.4	B0507.4	0,000932	0,003483	0.267535	-1.9022		1
B0507.5	B0507.5	B0507.5	0,000505	0
B0507.6	B0507.6	B0507.6	0,022246	0,013512	1.64643	0.719337
B0507.7	B0507.7	B0507.7	0,007392	0,001215	6.08368	2.60494	1
B0507.8	B0507.8	B0507.8	0,105593	0,062496	1.6896	0.756678
B0507.9	B0507.9	B0507.9	0,008552	0,002466	3.46788	1.79405	1
fkb-7	B0511.1	B0511.1	0,120092	0,092334	1.30063	0.379206
eif-3.E	B0511.10	B0511.10	2,31666	1,49872	1.54576	0.628315
B0511.11	B0511.11	B0511.11	0,056738	0,051291	1.1062	0.14561
B0511.12	B0511.12	B0511.12	1,44185	0,657611	2.19256	1.13261
B0511.13	B0511.13	B0511.13	0,530534	0,538713	0.984818	-0.0220717
B0511.14	B0511.14	B0511.14a	0,769812	0,40418	1.90463	0.929508
B0511.14	B0511.14	B0511.14b	0,847903	0,438924	1.93178	0.949928
B0511.2	B0511.2	B0511.2	0,01625	0,001883	8.63001	3.10936	1
fbxa-125	B0511.3	B0511.3	0,005286	0
tag-344	B0511.4	B0511.4	0,010587	0,000641	16.5159	4.04578	1
B0511.5	B0511.5	B0511.5	0,143245	0,054514	2.62767	1.39379
B0511.6	B0511.6	B0511.6.1	4,01895	2,90929	1.38142	0.466152
B0511.6	B0511.6	B0511.6.2	4,56119	3,0946	1.47392	0.559657
B0511.7	B0511.7	B0511.7	1,23866	1,34303	0.922288	-0.116711
tag-264	B0511.8	B0511.8.1	1,19083	0,553405	2.15182	1.10556
tag-264	B0511.8	B0511.8.2	1,17733	0,534486	2.20273	1.13929
mat-4	B0511.9	B0511.9a	3,23634	2,48657	1.30153	0.380206
mat-4	B0511.9	B0511.9b	2,70133	1,25087	2.15956	1.11074
lin-66	B0513.1	B0513.1	1,64851	1,12591	1.46416	0.550071
B0513.2	B0513.2	B0513.2	1,44661	0,890158	1.62512	0.700543
rpl-29	B0513.3	B0513.3.1	354,801	858,313	0.41337	-1.27449
rpl-29	B0513.3	B0513.3.2	425,941	1025,58	0.415317	-1.26771
B0513.4	B0513.4	B0513.4	8,02762	12,5972	0.637254	-0.650059
B0513.5	B0513.5	B0513.5	0,343724	0,182711	1.88124	0.911687
B0513.6	B0513.6	B0513.6	0	0
B0513.9	B0513.9	B0513.9a	0,861455	4,81772	0.17881	-2.4835		1
B0513.9	B0513.9	B0513.9b.1	0,863386	5,60073	0.154156	-2.69754		1
B0513.9	B0513.9	B0513.9b.2	0,867995	4,72597	0.183665	-2.44485		1
kin-31	B0523.1	B0523.1	0,017208	0,005674	3.03275	1.60062
pgl-2	B0523.3	B0523.3	0,316915	0,236073	1.34244	0.424863
fli-1	B0523.5	B0523.5	0,542527	0,243331	2.22958	1.15677
B0524.1	B0524.1	B0524.1	0,171765	0,180267	0.952837	-0.0696992
B0524.2	B0524.2	B0524.2	0,0025	0,002055	1.21644	0.282663
B0524.3	B0524.3	B0524.3	0,000208	0,000393	0.529155	-0.918237
B0524.4	B0524.4	B0524.4	0,00078	0,00023	3.39327	1.76268	1
B0524.5	B0524.5	B0524.5	0,006155	0,010094	0.60981	-0.713569
B0524.6	B0524.6	B0524.6	0,419593	0,698719	0.600518	-0.735722
B0524.7	B0524.7	B0524.7	0,338612	0,273866	1.23641	0.306163
tpa-1	B0545.1	B0545.1a	0,601438	0,298812	2.01276	1.00918
tpa-1	B0545.1	B0545.1b.1	0,519398	0,291034	1.78466	0.835653
tpa-1	B0545.1	B0545.1b.2	0,534643	0,287663	1.85857	0.894196
B0545.3	B0545.3	B0545.3	0,00418	0,003994	1.04656	0.0656548
B0545.4	B0545.4	B0545.4	0,033893	0,027769	1.22053	0.287504
37377	B0546.1	B0546.1.1	8,49521	20,9768	0.404981	-1.30407
37377	B0546.1	B0546.1.2	8,33447	20,4533	0.407488	-1.29517
37377	B0546.1	B0546.1.3	8,45883	20,7569	0.407519	-1.29506
B0546.2	B0546.2	B0546.2.1	1,02955	0,651777	1.5796	0.659564
B0546.2	B0546.2	B0546.2.2	1,10843	0,721947	1.53533	0.618553
B0546.3	B0546.3	B0546.3	0,534935	0,532742	1.00412	0.00592658
B0546.4	B0546.4	B0546.4a	1,23887	1,60523	0.771771	-0.373755
B0546.4	B0546.4	B0546.4b	0,596566	0,7403	0.805844	-0.311428
B0546.5	B0546.5	B0546.5	0	0
csn-5	B0547.1	B0547.1.1	2,37056	1,13748	2.08405	1.05939
csn-5	B0547.1	B0547.1.2	2,43345	1,13512	2.14378	1.10016
B0547.2	B0547.2	B0547.2	0	0
srd-8	B0547.4	B0547.4	0,002533	0,000364	6.95973	2.79903	1
B0554.1	B0554.1	B0554.1	0	0
B0554.2	B0554.2	B0554.2	0	0
B0554.3	B0554.3	B0554.3	0	0
B0554.4	B0554.4	B0554.4	0,002114	0
B0554.5	B0554.5	B0554.5	0,062928	0,011374	5.53264	2.46797	1
dod-20	B0554.6	B0554.6	0,006731	0,002172	3.09889	1.63175
B0554.7	B0554.7	B0554.7	0,002674	0,000218	12.2658	3.61657	1
B0563.1	B0563.1	B0563.1	0	0,009361	0
tsp-11	B0563.2	B0563.2	0,216687	0,063164	3.43055	1.77844	1
tag-132	B0563.4	B0563.4	2,42701	1,56923	1.54662	0.629123
B0563.5	B0563.5	B0563.5	0,450628	0,577292	0.780589	-0.357364
B0563.6	B0563.6	B0563.6a	0,060983	0,034339	1.77592	0.828564
B0563.6	B0563.6	B0563.6b.1	0,115925	0,052951	2.18929	1.13046
B0563.6	B0563.6	B0563.6b.2	0,115715	0,04806	2.40772	1.26767
B0563.7	B0563.7	B0563.7	0,045478	0,057418	0.792055	-0.336328
B0563.8	B0563.8	B0563.8	0,015052	0,087497	0.172023	-2.53933		1
B0563.9	B0563.9	B0563.9	0,615908	1,07548	0.572682	-0.804194
unc-30	B0564.10	B0564.10a	0,133838	0,087856	1.52338	0.607275
unc-30	B0564.10	B0564.10b	0,138111	0,07777	1.77589	0.828543
B0564.11	B0564.11	B0564.11	0,765962	0,360914	2.12228	1.08562
B0564.1	B0564.1	B0564.1a	1,31927	1,02657	1.28512	0.361908
tin-9.2	B0564.1	B0564.1b.1	1,3733	1,0732	1.27963	0.355728
tin-9.2	B0564.1	B0564.1b.2	1,49515	2,91729	0.512513	-0.964339
B0564.2	B0564.2	B0564.2	0,384246	0,667563	0.575595	-0.796874
B0564.3	B0564.3	B0564.3.1	1,80189	0,43619	4.13098	2.04648	1
B0564.3	B0564.3	B0564.3.2	1,83464	0,440467	4.16522	2.05839	1
B0564.4	B0564.4	B0564.4	0,10587	0,103716	1.02077	0.0296554
B0564.6	B0564.6	B0564.6a	nan	nan
B0564.6	B0564.6	B0564.6b	nan	nan
B0564.7	B0564.7	B0564.7.1	0,556704	0,315059	1.76698	0.821288
B0564.7	B0564.7	B0564.7.2	0,565373	0,31245	1.80948	0.855578
B0564.9	B0564.9	B0564.9	nan	nan
BE0003N10.1	BE0003N10.1	BE0003N10.1	0,2529	0,147438	1.7153	0.778459
BE0003N10.2	BE0003N10.2	BE0003N10.2	0,754815	0,422573	1.78624	0.836923
BE0003N10.3	BE0003N10.3	BE0003N10.3	0,059988	0,068195	0.879651	-0.184997
BE10.1	BE10.1	BE10.1	0,013024	0,000734	17.7433	4.1492	1
BE10.2	BE10.2	BE10.2	0,114812	0,020306	5.65409	2.4993	1
BE10.3	BE10.3	BE10.3	0,005529	0,013805	0.400488	-1.32017
BE10.4	BE10.4	BE10.4	0,012339	0,032645	0.377975	-1.40364
BE10.5	BE10.5	BE10.5	0	0
C01A2.1	C01A2.1	C01A2.1	0,015233	0,012185	1.25018	0.322132
C01A2.2	C01A2.2	C01A2.2	0,366235	0,219507	1.66844	0.738503
C01A2.3	C01A2.3	C01A2.3	0,448322	0,255487	1.75477	0.811285
C01A2.4	C01A2.4	C01A2.4	1,34895	1,3089	1.0306	0.043482
C01A2.5	C01A2.5	C01A2.5	0,91773	0,800694	1.14617	0.196819
C01A2.6	C01A2.6	C01A2.6	0,011173	0,008777	1.273	0.34823
nlp-38	C01A2.7	C01A2.7.1	0,468208	0,141426	3.31062	1.7271	1
nlp-38	C01A2.7	C01A2.7.2	0,57772	0,169269	3.41303	1.77105	1
drh-2	C01B10.1	C01B10.1	0,683719	0,225703	3.02929	1.59898
C01B10.10	C01B10.10	C01B10.10	0,081401	0,043466	1.87275	0.905159
C01B10.11	C01B10.11	C01B10.11	0,982412	0,469286	2.09342	1.06586
C01B10.3	C01B10.3	C01B10.3	0,512688	0,294572	1.74045	0.799461
C01B10.4	C01B10.4	C01B10.4	0,033555	0,007771	4.31796	2.11035	1
hil-7	C01B10.5	C01B10.5a	0,752882	3,03855	0.247777	-2.01289		1
hil-7	C01B10.5	C01B10.5b.1	0,814859	2,84951	0.285965	-1.80609		1
hil-7	C01B10.5	C01B10.5b.2	0,881438	3,12585	0.281983	-1.82632		1
hil-7	C01B10.5	C01B10.5c	0,837297	3,00473	0.27866	-1.84342		1
hil-7	C01B10.5	C01B10.5e	1,26597	3,22922	0.392036	-1.35094
C01B10.6	C01B10.6	C01B10.6a.1	8,69413	2,43324	3.57307	1.83716	1
C01B10.6	C01B10.6	C01B10.6a.2	8,72791	2,43205	3.58871	1.84346	1
C01B10.6	C01B10.6	C01B10.6b	8,41229	2,53996	3.31198	1.72769	1
C01B10.7	C01B10.7	C01B10.7	0,003531	0,006876	0.513496	-0.961574
C01B10.8	C01B10.8	C01B10.8.1	0,993067	0,473996	2.0951	1.06702
C01B10.8	C01B10.8	C01B10.8.2	1,02683	0,430625	2.38451	1.25369
C01B10.9	C01B10.9	C01B10.9	0,67428	0,378287	1.78246	0.833867
sqt-2	C01B12.1	C01B12.1	0,226477	0,27767	0.815634	-0.294007
C01B12.2	C01B12.2	C01B12.2	0,304627	0,233469	1.30479	0.383813
C01B12.3	C01B12.3	C01B12.3	0,11804	0,032445	3.63816	1.86321	1
C01B12.4	C01B12.4	C01B12.4	0,03956	0,016522	2.39437	1.25964
C01B12.5	C01B12.5	C01B12.5	0,037965	0,003569	10.6373	3.41107	1
C01B12.7	C01B12.7	C01B12.7	0,274891	0,195947	1.40288	0.488396
C01B12.8	C01B12.8	C01B12.8	0,219285	0,407276	0.538419	-0.8932
str-257	C01B4.1	C01B4.1	nan	nan
str-76	C01B4.10	C01B4.10	nan	nan
str-258	C01B4.3	C01B4.3	nan	nan
srd-61	C01B4.5	C01B4.5	nan	nan
C01B4.6	C01B4.6	C01B4.6	nan	nan
C01B4.7	C01B4.7	C01B4.7	nan	nan
C01B4.8	C01B4.8	C01B4.8	nan	nan
C01B4.9	C01B4.9	C01B4.9	nan	nan
C01B7.1	C01B7.1	C01B7.1a.1	0,563269	0,237188	2.37478	1.24779
C01B7.1	C01B7.1	C01B7.1a.2	0,564691	0,24019	2.35102	1.23329
C01B7.1	C01B7.1	C01B7.1b	0,980327	0,42072	2.33012	1.2204
C01B7.3	C01B7.3	C01B7.3	0,00327	0,000554	5.90253	2.56133	1
tag-117	C01B7.4	C01B7.4	0,209755	0,129743	1.6167	0.693048
C01B7.5	C01B7.5	C01B7.5	0,035729	0,032789	1.08967	0.123896
rpm-1	C01B7.6	C01B7.6	0,186499	0,061987	3.00868	1.58913
C01B7.7	C01B7.7	C01B7.7	nan	nan
C01B9.1	C01B9.1	C01B9.1	0,034536	0,005575	6.1948	2.63106	1
clc-2	C01C10.1	C01C10.1	0,268138	0,184988	1.44949	0.535544
C01C10.2	C01C10.2	C01C10.2a	0,47132	0,365281	1.29029	0.3677
C01C10.2	C01C10.2	C01C10.2b	0,370019	0,331513	1.11615	0.158534
acl-12	C01C10.3	C01C10.3	1,48368	0,625998	2.3701	1.24495
clc-5	C01C10.4	C01C10.4	0,413939	0,293691	1.40944	0.495119
nlp-1	C01C4.1	C01C4.1	0,800724	0,85913	0.932017	-0.101571
C01C4.2	C01C4.2	C01C4.2	0	0,005473	0
C01C4.3	C01C4.3	C01C4.3a	0,26057	0,149649	1.74121	0.800088
C01C4.3	C01C4.3	C01C4.3b	0,299129	0,177578	1.68449	0.752315
ark-1	C01C7.1	C01C7.1	0,690049	0,364156	1.89493	0.922142
C01F1.1	C01F1.1	C01F1.1	0,958151	0,67089	1.42818	0.514177
C01F1.2	C01F1.2	C01F1.2	0,683246	0,519426	1.31539	0.395487
C01F1.3	C01F1.3	C01F1.3a.1	0,284544	0,116574	2.44089	1.28741
C01F1.3	C01F1.3	C01F1.3a.2	0,279087	0,114559	2.43619	1.28462
C01F1.3	C01F1.3	C01F1.3b	0,40901	0,192981	2.11943	1.08368
C01F1.4	C01F1.4	C01F1.4	0,065179	0,019484	3.34528	1.74213	1
C01F1.5	C01F1.5	C01F1.5	0,043887	0,003343	13.1281	3.71458	1
C01F1.6	C01F1.6	C01F1.6	1,05675	0,589238	1.79342	0.842712
C01F4.2	C01F4.2	C01F4.2a	0,171413	0,076778	2.23258	1.15871
C01F4.2	C01F4.2	C01F4.2b	0,120151	0,040429	2.9719	1.57139
C01F6.1	C01F6.1	C01F6.1	0,842978	0,473469	1.78043	0.832225
C01F6.2	C01F6.2	C01F6.2	0,017168	0,009291	1.84784	0.885841
fem-3	C01F6.4	C01F6.4	0,434859	0,250473	1.73615	0.795893
aly-1	C01F6.5	C01F6.5	0,918456	1,66174	0.552707	-0.855412
tag-60	C01F6.6	C01F6.6a	2,66156	1,17715	2.26102	1.17697
tag-60	C01F6.6	C01F6.6b	1,94724	0,905309	2.15091	1.10495
tag-60	C01F6.6	C01F6.6c	2,43567	1,13141	2.15277	1.1062
tag-60	C01F6.6	C01F6.6d	2,34391	1,08451	2.16126	1.11187
tag-60	C01F6.6	C01F6.6e.1	2,94545	1,19474	2.46535	1.30179
tag-60	C01F6.6	C01F6.6e.2	2,8082	1,22593	2.29067	1.19577
tag-60	C01F6.6	C01F6.6e.3	2,54812	1,12782	2.25933	1.1759
tag-60	C01F6.6	C01F6.6e.4	2,66156	1,17715	2.26102	1.17697
tag-60	C01F6.6	C01F6.6e.5	2,6689	1,11149	2.40119	1.26375
icl-1	C01F6.8	C01F6.8a	2,29725	1,96073	1.17163	0.228517
icl-1	C01F6.8	C01F6.8b	2,05444	1,64463	1.24918	0.320982
C01F6.9	C01F6.9	C01F6.9	3,64084	13,5764	0.268174	-1.89876		1
C01G10.1	C01G10.1	C01G10.1	0,001377	0,000069	19.9568	4.31881	1
C01G10.10	C01G10.10	C01G10.10	0,172476	0,166327	1.03697	0.0523732
unc-76	C01G10.11	C01G10.11a.1	1,95342	1,1508	1.69745	0.763365
unc-76	C01G10.11	C01G10.11a.2	2,12631	1,02653	2.07136	1.05058
unc-76	C01G10.11	C01G10.11b.1	1,18472	0,675849	1.75294	0.809773
unc-76	C01G10.11	C01G10.11b.2	2,10112	1,00297	2.0949	1.06688
dnj-3	C01G10.12	C01G10.12	0,136897	0,153789	0.890161	-0.167861
C01G10.14	C01G10.14	C01G10.14	0,001266	0
C01G10.15	C01G10.15	C01G10.15	0,878697	0,451917	1.94438	0.959308
C01G10.16	C01G10.16	C01G10.16	0,082358	0,052718	1.56224	0.643613
C01G10.17	C01G10.17	C01G10.17	0,097694	0,03824	2.55475	1.35318
srx-79	C01G10.2	C01G10.2	0	0
srx-78	C01G10.3	C01G10.3	0,000287	0
C01G10.4	C01G10.4	C01G10.4	0,029743	0,060853	0.488766	-1.03278
C01G10.5	C01G10.5	C01G10.5	0,071091	0,04224	1.68304	0.751065
C01G10.6	C01G10.6	C01G10.6	0,670397	0,335997	1.99525	0.996567
C01G10.7	C01G10.7	C01G10.7	0,943247	0,554469	1.70117	0.766529
C01G10.8	C01G10.8	C01G10.8.1	5,51448	4,20304	1.31202	0.391792
C01G10.8	C01G10.8	C01G10.8.2	5,19088	3,94182	1.31687	0.397117
C01G10.9	C01G10.9	C01G10.9	0,95153	0,794662	1.1974	0.259908
C01G12.1	C01G12.1	C01G12.1	0,180993	0,056323	3.21348	1.68414
nspb-8	C01G12.10	C01G12.10	0,016745	0,00287	5.83449	2.54461	1
nspb-9	C01G12.11	C01G12.11	0,007664	0,005889	1.30145	0.380118
C01G12.13	C01G12.13	C01G12.13	0,002708	0
nspb-7	C01G12.2	C01G12.2	0,010918	0,001802	6.05877	2.59902	1
C01G12.3	C01G12.3	C01G12.3	0,214102	0,122583	1.74659	0.804539
C01G12.5	C01G12.5	C01G12.5	0,004178	0,002163	1.93141	0.949651
nspb-10	C01G12.6	C01G12.6	0,017777	0,005079	3.50006	1.80738	1
C01G12.7	C01G12.7	C01G12.7	0,05174	0,035549	1.45546	0.541471
C01G12.8	C01G12.8	C01G12.8	0,027113	0,003807	7.12196	2.83227	1
C01G12.9	C01G12.9	C01G12.9	0,001975	0
tag-292	C01G5.2	C01G5.2	2,42164	0,661027	3.66345	1.8732	1
C01G5.3	C01G5.3	C01G5.3	0,003759	0,000229	16.4148	4.03693	1
C01G5.4	C01G5.4	C01G5.4	0,002086	0,000227	9.1889	3.19989	1
C01G5.5	C01G5.5	C01G5.5	0,576975	0,371529	1.55297	0.635034
C01G5.6	C01G5.6	C01G5.6	1,44102	1,40272	1.0273	0.0388633
C01G5.7	C01G5.7	C01G5.7	0,026302	0,022112	1.18947	0.250321
C01G5.8	C01G5.8	C01G5.8	0,314258	0,209395	1.50079	0.585722
C01G5.9	C01G5.9	C01G5.9	0,02361	0,008369	2.82117	1.4963
aqp-2	C01G6.1	C01G6.1a.1	10,7286	7,35585	1.45851	0.544498
aqp-2	C01G6.1	C01G6.1a.2	10,6595	7,36651	1.44702	0.533087
aqp-2	C01G6.1	C01G6.1b.1	10,3597	7,11076	1.4569	0.542907
aqp-2	C01G6.1	C01G6.1b.2	12,5625	7,9773	1.57478	0.655151
C01G6.2	C01G6.2	C01G6.2	0,016695	0,064209	0.260013	-1.94334		1
C01G6.3	C01G6.3	C01G6.3	1,97073	3,10901	0.633877	-0.657725
C01G6.4	C01G6.4	C01G6.4	2,62836	1,59747	1.64533	0.718374
C01G6.5	C01G6.5	C01G6.5	2,60491	1,60226	1.62577	0.701125
tag-165	C01G6.6	C01G6.6a.1	0,887283	0,600647	1.47721	0.562877
tag-165	C01G6.6	C01G6.6a.2	0,905388	0,580285	1.56025	0.641775
tag-165	C01G6.6	C01G6.6a.3	0,90549	0,582542	1.55438	0.636337
tag-165	C01G6.6	C01G6.6b	0,974134	0,970673	1.00357	0.00513488
C01G6.7	C01G6.7	C01G6.7	0,293282	0,152606	1.92182	0.942477
cam-1	C01G6.8	C01G6.8a	1,52717	0,931943	1.63869	0.712547
cam-1	C01G6.8	C01G6.8b	1,52717	0,931943	1.63869	0.712547
cam-1	C01G6.8	C01G6.8c	1,52717	0,931943	1.63869	0.712547
C01G6.9	C01G6.9	C01G6.9	0,055525	0,036141	1.53634	0.619501
C01G8.1	C01G8.1	C01G8.1	6,44841	1,92329	3.3528	1.74537	1
cln-3.2	C01G8.2	C01G8.2.1	0,318801	0,224538	1.41981	0.505697
cln-3.2	C01G8.2	C01G8.2.2	0,331763	0,229208	1.44743	0.533496
dhs-1	C01G8.3	C01G8.3	1,2308	0,682544	1.80325	0.850602
dnj-4	C01G8.4	C01G8.4	0,326979	0,147296	2.21988	1.15048
erm-1	C01G8.5	C01G8.5a.1	4,51744	2,11725	2.13364	1.09331
erm-1	C01G8.5	C01G8.5a.2	4,51905	2,11781	2.13383	1.09345
erm-1	C01G8.5	C01G8.5b	4,56173	2,12625	2.14543	1.10127
C01G8.6	C01G8.6	C01G8.6	0,929723	0,436464	2.13013	1.09094
lss-4	C01G8.9	C01G8.9a	3,27541	1,69935	1.92745	0.946692
lss-4	C01G8.9	C01G8.9b	2,77034	1,21387	2.28224	1.19045
col-61	C01H6.1	C01H6.1	0,016729	0,003883	4.30822	2.10709	1
C01H6.2	C01H6.2	C01H6.2	0,067714	0,02348	2.8839	1.52802
C01H6.3	C01H6.3	C01H6.3	0,052426	0,045259	1.15836	0.212081
C01H6.4	C01H6.4	C01H6.4	0,132816	0,059854	2.219	1.14991
nhr-23	C01H6.5	C01H6.5a	0,727734	0,3374	2.15689	1.10895
nhr-23	C01H6.5	C01H6.5b.1	0,779318	0,337438	2.30951	1.20759
nhr-23	C01H6.5	C01H6.5b.2	0,835361	0,345484	2.41794	1.27378
nhr-23	C01H6.5	C01H6.5b.3	0,724498	0,3254	2.22648	1.15477
nhr-23	C01H6.5	C01H6.5c	0,916204	0,367619	2.49227	1.31746
nhr-23	C01H6.5	C01H6.5d	1,02866	0,396887	2.59182	1.37397
nhr-23	C01H6.5	C01H6.5e.1	0,724498	0,3254	2.22648	1.15477
nhr-23	C01H6.5	C01H6.5e.2	0,979019	0,396054	2.47193	1.30564
nhr-23	C01H6.5	C01H6.5f.1	0,832452	0,339823	2.44966	1.29258
nhr-23	C01H6.5	C01H6.5f.2	0,832912	0,339985	2.44985	1.29269
C01H6.6	C01H6.6	C01H6.6	0,161881	0,056892	2.84541	1.50864
tag-298	C01H6.7	C01H6.7	1,10969	0,813612	1.36391	0.447744
C01H6.8	C01H6.8	C01H6.8	0,081642	0,030119	2.71065	1.43864
C01H6.9	C01H6.9	C01H6.9	0,218508	0,19025	1.14853	0.19979
gst-33	C02A12.1	C02A12.1	0,072241	0,013272	5.44311	2.44443	1
srbc-33	C02A12.10	C02A12.10	0,000682	0
srbc-29	C02A12.2	C02A12.2	0	0
srbc-30	C02A12.3	C02A12.3	0	0
lys-7	C02A12.4	C02A12.4.1	17,6337	10,1073	1.74465	0.802938
lys-7	C02A12.4	C02A12.4.2	17,8431	9,91703	1.79924	0.847386
srbc-32	C02A12.5	C02A12.5	0	0,000447	0
srbc-36	C02A12.6	C02A12.6	0	0
C02A12.8	C02A12.8	C02A12.8	0,000425	0,00014	3.03375	1.6011
srbc-31	C02A12.9	C02A12.9	0	0
C02B10.1	C02B10.1	C02B10.1	2,41371	1,3246	1.82222	0.865696
C02B10.2	C02B10.2	C02B10.2	0,634058	1,9232	0.329689	-1.60082		1
C02B10.3	C02B10.3	C02B10.3.1	0,719765	0,409608	1.7572	0.813282
C02B10.3	C02B10.3	C02B10.3.2	1,4396	0,605709	2.37672	1.24897
C02B10.4	C02B10.4	C02B10.4.1	2,28068	2,56433	0.889386	-0.169118
C02B10.4	C02B10.4	C02B10.4.2	2,6144	2,85712	0.915047	-0.128082
C02B10.5	C02B10.5	C02B10.5.1	1,47113	0,915893	1.60622	0.683674
C02B10.5	C02B10.5	C02B10.5.2	1,63341	0,900715	1.81346	0.858744
C02B10.5	C02B10.5	C02B10.5.3	1,6483	0,918894	1.79379	0.843008
C02B10.6	C02B10.6	C02B10.6	0,012822	0
adt-1	C02B4.1	C02B4.1	0,039062	0,013553	2.88214	1.52714
nhr-17	C02B4.2	C02B4.2	0,192205	0,137002	1.40294	0.488449
C02B4.3	C02B4.3	C02B4.3	0,116332	0,161614	0.719814	-0.474304
C02B8.1	C02B8.1	C02B8.1.1	0,022782	0,023551	0.967335	-0.0479129
C02B8.1	C02B8.1	C02B8.1.2	0,030245	0,032024	0.944457	-0.0824426
C02B8.2	C02B8.2	C02B8.2	0	0
C02B8.3	C02B8.3	C02B8.3	0,268311	0,081777	3.28101	1.71414	1
hlh-8	C02B8.4	C02B8.4	0,062916	0,080696	0.779662	-0.359079
C02B8.5	C02B8.5	C02B8.5	0,034759	0,003506	9.91423	3.3095	1
C02B8.6	C02B8.6	C02B8.6	0,235823	0,200182	1.17804	0.236392
C02B8.7	C02B8.7	C02B8.7	0	0
tyr-1	C02C2.1	C02C2.1.1	0,342807	0,166426	2.05982	1.04252
tyr-1	C02C2.1	C02C2.1.2	0,34975	0,165266	2.11629	1.08153
cup-4	C02C2.3	C02C2.3	0,163364	0,092701	1.76227	0.817433
C02C2.4	C02C2.4	C02C2.4	0,04718	0,008356	5.64623	2.49729	1
C02C2.5	C02C2.5	C02C2.5	0,088873	0,034311	2.59022	1.37307
dyn-1	C02C6.1	C02C6.1a	1,62556	0,7784	2.08834	1.06235
dyn-1	C02C6.1	C02C6.1b	1,66576	0,79766	2.08831	1.06233
C02C6.2	C02C6.2	C02C6.2a	0,309213	0,224383	1.37806	0.462638
C02C6.2	C02C6.2	C02C6.2b	0,359391	0,217878	1.64951	0.722034
C02C6.3	C02C6.3	C02C6.3a	0,691213	0,532158	1.29889	0.377276
C02C6.3	C02C6.3	C02C6.3b	0,699659	0,561692	1.24563	0.316873
C02D4.1	C02D4.1	C02D4.1	0,020343	0,000626	32.4974	5.02225	1
ser-2	C02D4.2	C02D4.2a	0,117042	0,027828	4.20591	2.07242	1
ser-2	C02D4.2	C02D4.2b	0,117417	0,02811	4.17705	2.06249	1
ser-2	C02D4.2	C02D4.2c	0,123778	0,031725	3.90159	1.96406	1
ser-2	C02D4.2	C02D4.2d	0,124722	0,03322	3.75443	1.90859	1
ser-2	C02D4.2	C02D4.2e	0,115532	0,029788	3.87847	1.95549	1
ser-2	C02D4.2	C02D4.2f	0,09883	0,026343	3.75165	1.90753	1
C02D5.1	C02D5.1	C02D5.1	0,061435	0,01081	5.68317	2.5067	1
C02D5.2	C02D5.2	C02D5.2a	0,143437	0,08142	1.76169	0.816962
C02D5.2	C02D5.2	C02D5.2b	0,137159	0,035668	3.84544	1.94315	1
C02D5.3	C02D5.3	C02D5.3a	0,991866	0,271756	3.64984	1.86783	1
C02D5.3	C02D5.3	C02D5.3b	2,45117	0,626282	3.91384	1.96859	1
C02D5.3	C02D5.3	C02D5.3c	0,013424	0,012314	1.09012	0.124483
C02E11.1	C02E11.1	C02E11.1a.1	1,71866	0,928611	1.85079	0.888138
C02E11.1	C02E11.1	C02E11.1a.2	1,75112	0,951132	1.84109	0.88056
C02E11.1	C02E11.1	C02E11.1b	1,75025	0,951053	1.84033	0.879963
C02E7.1	C02E7.1	C02E7.1	0,00422	0,000161	26.2129	4.7122	1
C02E7.10	C02E7.10	C02E7.10	0,005818	0,001835	3.17069	1.6648
str-211	C02E7.13	C02E7.13	0	0
srh-21	C02E7.2	C02E7.2	0,007768	0,002451	3.1693	1.66417
srh-20	C02E7.3	C02E7.3	0,002234	0
srh-22	C02E7.4	C02E7.4	0,00259	0,000375	6.90725	2.78811	1
srh-23	C02E7.5	C02E7.5	0,00559	0,00039	14.3332	3.84129	1
C02E7.6	C02E7.6	C02E7.6	5,8402	7,40962	0.788192	-0.343382
C02E7.7	C02E7.7	C02E7.7	3,36747	4,15987	0.809513	-0.304873
C02E7.8	C02E7.8	C02E7.8	0	0
str-205	C02E7.9	C02E7.9	0	0
tsp-17	C02F12.1	C02F12.1	0,040586	0,005297	7.66217	2.93775	1
C02F12.3	C02F12.3	C02F12.3.1	1,47767	0,860902	1.71642	0.779403
C02F12.3	C02F12.3	C02F12.3.2	1,45004	0,770931	1.88089	0.911419
tag-52	C02F12.4	C02F12.4	0,591882	0,374321	1.58122	0.661034
C02F12.5	C02F12.5	C02F12.5	0,639227	0,946237	0.675546	-0.565873
tag-278	C02F12.7	C02F12.7	0,236154	0,123569	1.91111	0.934411
C02F12.8	C02F12.8	C02F12.8	0,268678	0,140925	1.90653	0.930951
C02F12.9	C02F12.9	C02F12.9	0,004897	0,006131	0.798711	-0.324254
ced-5	C02F4.1	C02F4.1	0,561084	0,214487	2.61593	1.38733
tax-6	C02F4.2	C02F4.2a	2,42722	1,27837	1.89868	0.924999
tax-6	C02F4.2	C02F4.2b	2,30208	1,19459	1.92709	0.946422
tax-6	C02F4.2	C02F4.2c	1,74653	1,12214	1.55643	0.638239
C02F4.3	C02F4.3	C02F4.3	0,001721	0,019033	0.0904482	-3.46676		1
C02F4.4	C02F4.4	C02F4.4	0,074145	0,109079	0.679738	-0.55695
C02F4.5	C02F4.5	C02F4.5	0	0
knl-1	C02F5.1	C02F5.1	1,10894	0,695836	1.59368	0.672362
C02F5.10	C02F5.10	C02F5.10	0,075759	0,082148	0.922225	-0.11681
tsp-2	C02F5.11	C02F5.11	0,098189	0,172161	0.570333	-0.810124
C02F5.12	C02F5.12	C02F5.12	0,104006	0,090764	1.14589	0.196475
C02F5.13	C02F5.13	C02F5.13	0,581661	0,49115	1.18428	0.244015
C02F5.14	C02F5.14	C02F5.14	0,156001	0,049016	3.18265	1.67023
C02F5.2	C02F5.2	C02F5.2	0,00908	0,01434	0.633198	-0.659271
C02F5.3	C02F5.3	C02F5.3	1,95446	1,24364	1.57156	0.652201
C02F5.4	C02F5.4	C02F5.4	0,844358	0,627354	1.3459	0.428575
C02F5.5	C02F5.5	C02F5.5	0,040531	0,014531	2.78926	1.47988
C02F5.6	C02F5.6	C02F5.6a	0,846513	0,414209	2.04369	1.03117
C02F5.6	C02F5.6	C02F5.6b	0,60588	0,315936	1.91773	0.9394
C02F5.7	C02F5.7	C02F5.7a.1	1,63845	0,705383	2.32278	1.21585
C02F5.7	C02F5.7	C02F5.7a.2	1,54268	0,626362	2.46292	1.30037
C02F5.7	C02F5.7	C02F5.7a.3	1,86546	0,717847	2.59869	1.37778
C02F5.7	C02F5.7	C02F5.7a.4	1,86429	0,717946	2.5967	1.37668
C02F5.7	C02F5.7	C02F5.7b.1	1,50257	0,723799	2.07595	1.05377
C02F5.7	C02F5.7	C02F5.7b.2	1,86425	0,725186	2.57072	1.36217
tsp-1	C02F5.8	C02F5.8	0,317166	0,229818	1.38007	0.464746
pbs-6	C02F5.9	C02F5.9.1	4,88226	3,90682	1.24968	0.321554
pbs-6	C02F5.9	C02F5.9.2	4,95367	4,07267	1.21632	0.282523
C02G6.1	C02G6.1	C02G6.1	0,015446	0,002623	5.88875	2.55796	1
C02G6.2	C02G6.2	C02G6.2	0,000499	0,000341	1.46198	0.547926
C02G6.3	C02G6.3	C02G6.3	0,033151	0,020927	1.58413	0.663687
C02H6.1	C02H6.1	C02H6.1	0,000374	0,000365	1.02596	0.0369768
fbxa-105	C02H6.2	C02H6.2	0,063641	0,074811	0.850693	-0.233289
C02H7.1	C02H7.1	C02H7.1	0,037852	0,01926	1.96532	0.974766
C02H7.2	C02H7.2	C02H7.2	0,021159	0,003857	5.48595	2.45574	1
aex-3	C02H7.3	C02H7.3a	0,198623	0,133758	1.48494	0.570408
aex-3	C02H7.3	C02H7.3b	0,212327	0,141522	1.50031	0.585261
C03A3.1	C03A3.1	C03A3.1a	0,13674	0,053242	2.56827	1.3608
C03A3.1	C03A3.1	C03A3.1b	0,156469	0,046005	3.40113	1.76601	1
C03A3.2	C03A3.2	C03A3.2.1	1,21488	0,649358	1.87089	0.903728
C03A3.2	C03A3.2	C03A3.2.2	1,26418	0,631173	2.00291	1.00209
C03A3.3	C03A3.3	C03A3.3	0,016626	0,000935	17.7815	4.1523	1
C03A7.1	C03A7.1	C03A7.1	0,089414	0,074972	1.19263	0.254141
srt-65	C03A7.10	C03A7.10	0,002337	0
ugt-51	C03A7.11	C03A7.11	0,109539	0,068344	1.60276	0.680558
C03A7.12	C03A7.12	C03A7.12	0,087908	0,036952	2.37899	1.25035
C03A7.13	C03A7.13	C03A7.13	0,112535	0,073034	1.54086	0.623734
abu-8	C03A7.14	C03A7.14	0,692572	0,020019	34.5957	5.11252	1
C03A7.2	C03A7.2	C03A7.2	0,101678	0,079505	1.27889	0.35489
srw-140	C03A7.3	C03A7.3	0,000018	0
pqn-5	C03A7.4	C03A7.4	0,013672	0
srx-38	C03A7.5	C03A7.5	0,001189	0
srx-39	C03A7.6	C03A7.6	0	0
abu-6	C03A7.7	C03A7.7	0	0
abu-7	C03A7.8	C03A7.8	0,004804	0,004892	0.982005	-0.0261973
srt-64	C03A7.9	C03A7.9	0,005228	0,00041	12.7519	3.67264	1
C03B1.1	C03B1.1	C03B1.1	0	0
C03B1.10	C03B1.10	C03B1.10	0,035951	0,038885	0.924542	-0.11319
lmp-1	C03B1.12	C03B1.12.1	12,5662	6,55319	1.91757	0.939279
lmp-1	C03B1.12	C03B1.12.2	13,9824	7,51446	1.86073	0.895871
C03B1.13	C03B1.13	C03B1.13	0,0753	0,06318	1.19183	0.253176
C03B1.14	C03B1.14	C03B1.14	0,14801	0,137029	1.08014	0.111213
C03B1.15	C03B1.15	C03B1.15	0,006431	0
C03B1.2	C03B1.2	C03B1.2	0,011833	0,000998	11.8569	3.56766	1
C03B1.3	C03B1.3	C03B1.3	0,002583	0
C03B1.4	C03B1.4	C03B1.4	0,000435	0,000611	0.712383	-0.489275
C03B1.5	C03B1.5	C03B1.5	0,017804	0,007645	2.32883	1.2196
C03B1.6	C03B1.6	C03B1.6	0	0,002263	0
C03B1.7	C03B1.7	C03B1.7	0,052435	0,041724	1.25672	0.329664
C03B1.9	C03B1.9	C03B1.9	0	0
C03B8.1	C03B8.1	C03B8.1	0,040428	0,025299	1.59801	0.676278
C03B8.2	C03B8.2	C03B8.2	0,125754	0,120275	1.04555	0.0642675
C03B8.3	C03B8.3	C03B8.3	0,013848	0,009446	1.46604	0.551923
lin-13	C03B8.4	C03B8.4	1,52704	0,761811	2.00449	1.00323
kin-19	C03C10.1	C03C10.1.1	6,77033	4,34018	1.55992	0.641471
kin-19	C03C10.1	C03C10.1.2	6,76233	4,31712	1.5664	0.647451
kin-19	C03C10.1	C03C10.1.3	9,66878	5,30872	1.8213	0.86497
C03C10.2	C03C10.2	C03C10.2	0,004906	0,000319	15.3801	3.943	1
rnr-2	C03C10.3	C03C10.3.1	10,1256	8,17585	1.23848	0.308567
rnr-2	C03C10.3	C03C10.3.2	10,2534	8,25317	1.24236	0.313082
rnr-2	C03C10.3	C03C10.3.3	10,9614	8,72608	1.25617	0.329026
C03C10.4	C03C10.4	C03C10.4	1,47875	1,53079	0.966004	-0.0498982
C03C10.5	C03C10.5	C03C10.5	0,154491	0,256334	0.602694	-0.730502
C03C10.6	C03C10.6	C03C10.6	0,194228	0,077718	2.49914	1.32143
C03C10.7	C03C10.7	C03C10.7	0,001113	0,001399	0.79574	-0.329631
C03C11.1	C03C11.1	C03C11.1	0,015686	0
fog-3	C03C11.2	C03C11.2	0,041857	0,01535	2.72684	1.44723
C03D6.1	C03D6.1	C03D6.1	0,059907	0,074076	0.808723	-0.306282
cel-1	C03D6.3	C03D6.3a	0,56511	0,516071	1.09502	0.130962
cel-1	C03D6.3	C03D6.3b	0,65044	0,441479	1.47332	0.559071
npp-14	C03D6.4	C03D6.4	1,19201	0,784286	1.51987	0.603945
C03D6.5	C03D6.5	C03D6.5	2,15859	1,26522	1.7061	0.770701
C03D6.6	C03D6.6	C03D6.6	1,04789	1,13365	0.924351	-0.113488
rpl-24.2	C03D6.8	C03D6.8.1	3,43938	5,45812	0.63014	-0.666256
rpl-24.2	C03D6.8	C03D6.8.2	3,41527	5,5542	0.614899	-0.701579
C03E10.1	C03E10.1	C03E10.1	0	0
C03E10.3	C03E10.3	C03E10.3	0,03389	0,010624	3.18992	1.67352
gly-20	C03E10.4	C03E10.4	1,60802	0,847586	1.89718	0.923854
C03E10.5	C03E10.5	C03E10.5	0,113158	0,196761	0.575104	-0.798106
C03E10.6	C03E10.6	C03E10.6	0,592904	1,38295	0.428724	-1.22188
C03F11.1	C03F11.1	C03F11.1	0,06089	0,028469	2.13883	1.09682
C03F11.2	C03F11.2	C03F11.2	0,027349	0,062111	0.440321	-1.18337
C03F11.3	C03F11.3	C03F11.3	0,556386	0,359776	1.54648	0.628987
C03F11.4	C03F11.4	C03F11.4.1	0,072926	0,067072	1.08728	0.120729
C03F11.4	C03F11.4	C03F11.4.2	0,076356	0,06175	1.23653	0.306301
C03F11.4	C03F11.4	C03F11.4.3	0,07629	0,062366	1.22326	0.290727
sdha-1	C03G5.1	C03G5.1.1	3,47304	1,4836	2.34095	1.2271
sdha-1	C03G5.1	C03G5.1.2	3,4704	1,47915	2.34621	1.23033
nspc-3	C03G5.10	C03G5.10	0,940332	0,619455	1.518	0.602171
nspc-4	C03G5.11	C03G5.11	4,80621	7,54349	0.637133	-0.650332
nspc-5	C03G5.12	C03G5.12	0,10143	0
nspc-6	C03G5.13	C03G5.13	nan	nan
nspc-7	C03G5.2	C03G5.2	0,314907	0,855707	0.368008	-1.44219
flp-5	C03G5.7	C03G5.7	1,61256	5,99543	0.268965	-1.89451		1
nspc-1	C03G5.8	C03G5.8	0,420513	1,38192	0.304296	-1.71645		1
nspc-2	C03G5.9	C03G5.9	nan	nan
nhr-148	C03G6.10	C03G6.10	0,014305	0,010338	1.38375	0.468583
srh-231	C03G6.11	C03G6.11	0	0
nhr-149	C03G6.12	C03G6.12	0,008071	0,001009	7.99906	2.99983	1
tag-293	C03G6.13	C03G6.13	0,086758	0,006013	14.4284	3.85083	1
cyp-35A1	C03G6.14	C03G6.14	0,014513	0,000255	56.9125	5.83067	1
cyp-35A2	C03G6.15	C03G6.15	1,07357	0,098729	10.8739	3.4428	1
srsx-24	C03G6.16	C03G6.16	0,004174	0
C03G6.17	C03G6.17	C03G6.17	0,272105	0,066615	4.08474	2.03024	1
srp-5	C03G6.18	C03G6.18	0	0,000637	0
srp-6	C03G6.19	C03G6.19	0,207471	0,10852	1.91182	0.934949
srx-56	C03G6.2	C03G6.2	0,007255	0
srj-14	C03G6.3	C03G6.3	0,059839	0,033537	1.78427	0.835332
C03G6.5	C03G6.5	C03G6.5	1,34486	1,11183	1.20959	0.27452
C03G6.6	C03G6.6	C03G6.6	0,000591	0
srh-275	C03G6.7	C03G6.7	0	0
nhr-147	C03G6.8	C03G6.8	0,023498	0,012664	1.85549	0.891799
srh-244	C03G6.9	C03G6.9	0,001041	0
C03H12.1	C03H12.1	C03H12.1	0,173105	0,160468	1.07875	0.109362
clec-10	C03H5.1	C03H5.1	0,224398	0,15947	1.40715	0.492775
C03H5.2	C03H5.2	C03H5.2	1,54382	0,993689	1.55362	0.635638
C03H5.3	C03H5.3	C03H5.3	0,642871	0,743164	0.865046	-0.209151
C03H5.4	C03H5.4	C03H5.4	0,001616	0,002429	0.665089	-0.588382
C03H5.5	C03H5.5	C03H5.5	0,06774	0,038535	1.75789	0.813841
C03H5.6	C03H5.6	C03H5.6	0,229722	0,067766	3.38993	1.76126	1
C03H5.7	C03H5.7	C03H5.7	0,015696	0,005158	3.04298	1.60549
C04A11.1	C04A11.1	C04A11.1	0,086116	0,025842	3.33241	1.73657	1
C04A11.2	C04A11.2	C04A11.2	0,135146	0,130403	1.03637	0.0515418
gck-4	C04A11.3	C04A11.3	0,551746	0,399364	1.38156	0.4663
adm-2	C04A11.4	C04A11.4	0,395923	0,27972	1.41543	0.501236
C04A11.5	C04A11.5	C04A11.5	0,098539	0,236006	0.417527	-1.26006
C04A2.1	C04A2.1	C04A2.1.1	0,265083	0,189848	1.39629	0.481599
C04A2.1	C04A2.1	C04A2.1.2	0,234431	0,140226	1.67181	0.741409
egl-27	C04A2.3	C04A2.3a	3,18533	1,7729	1.79668	0.845332
egl-27	C04A2.3	C04A2.3b	3,06842	1,70668	1.79789	0.846303
egl-27	C04A2.3	C04A2.3c.1	4,7432	2,52779	1.87642	0.907984
egl-27	C04A2.3	C04A2.3c.2	4,98666	2,46279	2.0248	1.01778
egl-27	C04A2.3	C04A2.3c.3	4,98967	2,46297	2.02588	1.01855
dnj-5	C04A2.7	C04A2.7a	3,30352	1,62266	2.03587	1.02564
dnj-5	C04A2.7	C04A2.7b.1	3,2472	1,68938	1.92213	0.942702
dnj-5	C04A2.7	C04A2.7b.2	2,83408	1,4203	1.99541	0.996685
dnj-5	C04A2.7	C04A2.7c	3,30559	1,60636	2.05781	1.04111
dnj-5	C04A2.7	C04A2.7d	3,36357	1,75437	1.91725	0.93904
C04B4.1	C04B4.1	C04B4.1	0	0,000208	0
C04B4.2	C04B4.2	C04B4.2	0,902413	0,480261	1.87901	0.909969
C04B4.3	C04B4.3	C04B4.3	0	0
C04B4.4	C04B4.4	C04B4.4	0,000258	0,000212	1.21475	0.280654
C04B4.5	C04B4.5	C04B4.5	0	0
C04B4.6	C04B4.6	C04B4.6	0	0
C04C11.1	C04C11.1	C04C11.1b	0,369686
C04C11.2	C04C11.2	C04C11.2.1	1,17836	0,691092	1.70507	0.769831
C04C11.2	C04C11.2	C04C11.2.2	1,22898	0,75806	1.62122	0.697077
srz-60	C04C3.1	C04C3.1	0,002422	0,006245	0.38775	-1.3668
C04C3.2	C04C3.2	C04C3.2	0,015982	0,004634	3.44894	1.78615	1
C04C3.3	C04C3.3	C04C3.3.1	4,00965	1,51883	2.63996	1.40052
C04C3.3	C04C3.3	C04C3.3.2	4,11812	1,48653	2.77029	1.47004
C04C3.4	C04C3.4	C04C3.4	0	0
dyf-3	C04C3.5	C04C3.5a	0,092336	0,055249	1.67127	0.740948
dyf-3	C04C3.5	C04C3.5b	0,097866	0,05246	1.86554	0.899594
dyf-3	C04C3.5	C04C3.5c	0,086654	0,049017	1.76783	0.821981
C04C3.6	C04C3.6	C04C3.6	0,011716	0,006659	1.75936	0.815053
C04C3.7	C04C3.7	C04C3.7	0	0
C04D8.1	C04D8.1	C04D8.1	1,37174	0,739947	1.85384	0.890513
C04E12.10	C04E12.10	C04E12.10	0	0
C04E12.11	C04E12.11	C04E12.11	0,054022	0,021015	2.57064	1.36213
C04E12.12	C04E12.12	C04E12.12	0,099974	0,024886	4.01728	2.00622	1
C04E12.2	C04E12.2	C04E12.2.1	0,208149	0,058393	3.56462	1.83375	1
C04E12.2	C04E12.2	C04E12.2.2	0,230692	0,031461	7.33263	2.87433	1
C04E12.4	C04E12.4	C04E12.4	0,266966	0,060021	4.44788	2.15312	1
C04E12.5	C04E12.5	C04E12.5	0,003014	0,000966	3.12014	1.64161
C04E12.6	C04E12.6	C04E12.6	0,000742	0
plsc-1	C04E12.7	C04E12.7	0,058627	0,02271	2.58155	1.36824
srx-121	C04E12.8	C04E12.8	0	0
srbc-2	C04E12.9	C04E12.9	0	0
srd-15	C04E6.10	C04E6.10	0,002727	0,00036	7.57547	2.92134	1
C04E6.11	C04E6.11	C04E6.11	0,295426	0,150753	1.95967	0.97061
C04E6.12	C04E6.12	C04E6.12	0,023532	0,013275	1.77266	0.825918
C04E6.13	C04E6.13	C04E6.13	0,65973	1,08186	0.609811	-0.713566
srsx-18	C04E6.2	C04E6.2	0,00595	0,000829	7.17755	2.84349	1
C04E6.3	C04E6.3	C04E6.3	0	0
C04E6.4	C04E6.4	C04E6.4	0,000834	0
C04E6.5	C04E6.5	C04E6.5	0,006248	0,000373	16.7513	4.0662	1
grd-9	C04E6.6	C04E6.6	0,000698	0
C04E6.7	C04E6.7	C04E6.7	0,113672	0,057909	1.96294	0.973017
C04E6.8	C04E6.8	C04E6.8	0,045131	0,031151	1.44879	0.534853
srd-16	C04E6.9	C04E6.9	0	0
C04E7.1	C04E7.1	C04E7.1	0,002361	0
C04E7.2	C04E7.2	C04E7.2	0,177579	0,161104	1.10226	0.140469
C04E7.3	C04E7.3	C04E7.3	0,062519	0,065589	0.953189	-0.0691661
C04E7.4	C04E7.4	C04E7.4	0,094838	0,0621	1.52718	0.610866
C04F1.1	C04F1.1	C04F1.1	0,005725	0,004464	1.28239	0.35883
lim-7	C04F1.3	C04F1.3	0,297964	0,092355	3.22629	1.68988
C04F12.1	C04F12.1	C04F12.1	0,67063	0,439522	1.52582	0.609582
fce-1	C04F12.10	C04F12.10	1,81007	1,0522	1.72027	0.782637
ikb-1	C04F12.3	C04F12.3	0,242898	0,214166	1.13416	0.181621
rpl-14	C04F12.4	C04F12.4.1	69,5877	106,831	0.651381	-0.618426
rpl-14	C04F12.4	C04F12.4.2	67,4161	101,475	0.664362	-0.589959
C04F12.5	C04F12.5	C04F12.5	0,675051	1,80199	0.374614	-1.41652
C04F12.6	C04F12.6	C04F12.6	0,001735	0
C04F12.7	C04F12.7	C04F12.7	0,104494	0,020472	5.10424	2.3517	1
C04F12.8	C04F12.8	C04F12.8	0,747122	0,376802	1.9828	0.987537
rnh-1.3	C04F12.9	C04F12.9	0,428205	0,787827	0.543527	-0.879577
srh-79	C04F2.1	C04F2.1	0	0
srh-229	C04F2.4	C04F2.4	0,000951	0
sid-1	C04F5.1	C04F5.1	0,62569	0,233938	2.6746	1.41932
C04F5.2	C04F5.2	C04F5.2	0,005571	0,001579	3.52813	1.8189	1
unc-46	C04F5.3	C04F5.3	0,038772	0,012535	3.09312	1.62906
srab-1	C04F5.4	C04F5.4	0	0
srab-2	C04F5.5	C04F5.5	0	0
srab-3	C04F5.6	C04F5.6	0,000454	0
ugt-63	C04F5.7	C04F5.7	0,013782	0,01895	0.727256	-0.459465
C04F5.8	C04F5.8	C04F5.8	1,30337	1,11827	1.16552	0.220978
C04F5.9	C04F5.9	C04F5.9	0,274287	0,188461	1.4554	0.54142
vit-5	C04F6.1	C04F6.1.1	75,7557	114,193	0.663401	-0.592048
vit-5	C04F6.1	C04F6.1.2	75,9604	114,508	0.663363	-0.592129
vit-5	C04F6.1	C04F6.1.3	75,8573	114,35	0.663378	-0.592096
C04F6.2	C04F6.2	C04F6.2	0,047764	0,041163	1.16037	0.214588
cht-1	C04F6.3	C04F6.3.1	1,35079	2,43475	0.554796	-0.84997
cht-1	C04F6.3	C04F6.3.2	1,37702	2,41737	0.569636	-0.811889
unc-78	C04F6.4	C04F6.4a	0,678743	0,474727	1.42975	0.515767
unc-78	C04F6.4	C04F6.4b.1	0,663625	0,485841	1.36593	0.449884
unc-78	C04F6.4	C04F6.4b.2	0,55765	0,441391	1.26339	0.337303
dhs-27	C04F6.5	C04F6.5	0,189003	0,183688	1.02893	0.0411518
C04G2.1	C04G2.1	C04G2.1	0,252183	0,140092	1.80012	0.848096
C04G2.10	C04G2.10	C04G2.10	0,294353	0,400776	0.734458	-0.445249
C04G2.11	C04G2.11	C04G2.11	0,000294	0,000388	0.757799	-0.400113
C04G2.2	C04G2.2	C04G2.2	0,025186	0,001564	16.1034	4.00929	1
msp-36	C04G2.4	C04G2.4	1,47948	0,177089	8.35444	3.06254	1
C04G2.5	C04G2.5	C04G2.5	0,010906	0
dis-3	C04G2.6	C04G2.6	0,849095	0,415449	2.0438	1.03125
egl-38	C04G2.7	C04G2.7	0,142701	0,114949	1.24143	0.312002
C04G2.8	C04G2.8	C04G2.8	0,286419	0,012091	23.6886	4.56612	1
C04G2.9	C04G2.9	C04G2.9	0,259596	0,01169	22.2067	4.47292	1
C04G6.10	C04G6.10	C04G6.10	0,029064	0,001842	15.7784	3.97988	1
C04G6.11	C04G6.11	C04G6.11	0	0
mpk-2	C04G6.1	C04G6.1a	0,198114	0,060541	3.27239	1.71035	1
mpk-2	C04G6.1	C04G6.1b	0,233201	0,073822	3.15896	1.65945
mpk-2	C04G6.1	C04G6.1c.1	0,204742	0,062014	3.30154	1.72314	1
mpk-2	C04G6.1	C04G6.1c.2	0,203897	0,063027	3.23507	1.6938
C04G6.2	C04G6.2	C04G6.2	0,017667	0,033285	0.530786	-0.913799
pld-1	C04G6.3	C04G6.3.1	1,12493	0,474077	2.37288	1.24664
pld-1	C04G6.3	C04G6.3.2	1,13996	0,478672	2.38151	1.25187
C04G6.4	C04G6.4	C04G6.4	0,641396	0,323237	1.98429	0.988623
C04G6.5	C04G6.5	C04G6.5	0,648798	0,784013	0.827535	-0.273108
C04G6.6	C04G6.6	C04G6.6	0,013876	0,017398	0.797546	-0.326361
C04G6.7	C04G6.7	C04G6.7	0,04016	0,009073	4.42626	2.14609	1
C04H4.1	C04H4.1	C04H4.1	0,026235	0,033037	0.794098	-0.332612
C04H5.1	C04H5.1	C04H5.1	0,685923	1,95611	0.350657	-1.51187		1
C04H5.2	C04H5.2	C04H5.2	0,665071	1,22594	0.542499	-0.882308
gcy-29	C04H5.3	C04H5.3	0,037846	0,002289	16.5337	4.04734	1
mog-4	C04H5.6	C04H5.6	0,597219	0,417079	1.43191	0.517939
C04H5.7	C04H5.7	C04H5.7	1,22035	3,01826	0.404322	-1.30642
nlp-41	C04H5.8	C04H5.8	0,527023	0,718082	0.733932	-0.446283
pph-1	C05A2.1	C05A2.1	0,483596	0,393532	1.22886	0.297321
pgp-5	C05A9.1	C05A9.1	0,091684	0,051698	1.77346	0.826566
C05A9.2	C05A9.2	C05A9.2	0,44013	0,560481	0.785272	-0.348736
C05A9.3	C05A9.3	C05A9.3	0,071477	0,006136	11.6488	3.54211	1
lip-1	C05B10.1	C05B10.1	1,09781	0,594322	1.84716	0.885312
C05B5.1	C05B5.1	C05B5.1	0,010827	0,007193	1.50527	0.590021
C05B5.2	C05B5.2	C05B5.2	0,023539	0,005094	4.62083	2.20815	1
pqn-8	C05B5.3	C05B5.3	0,039535	0,026273	1.50477	0.589542
C05B5.4	C05B5.4	C05B5.4	0,116948	0,13527	0.864552	-0.209975
C05B5.5	C05B5.5	C05B5.5	0,015908	0,01027	1.54895	0.631289
C05B5.6	C05B5.6	C05B5.6	0,003728	0,000534	6.98208	2.80366	1
rgs-1	C05B5.7	C05B5.7	0,106569	0,070275	1.51646	0.600704
C05B5.8	C05B5.8	C05B5.8	0,833258	0,627008	1.32894	0.410279
C05B5.9	C05B5.9	C05B5.9	0,034704	0,043103	0.80515	-0.31267
C05C10.1	C05C10.1	C05C10.1	0,005557	0,005773	0.962505	-0.0551344
C05C10.2	C05C10.2	C05C10.2a	0,877619	0,440016	1.99452	0.996039
C05C10.2	C05C10.2	C05C10.2b.1	0,895875	0,447217	2.00322	1.00232
C05C10.2	C05C10.2	C05C10.2b.2	0,896369	0,444101	2.01839	1.0132
C05C10.3	C05C10.3	C05C10.3.1	1,34321	0,705705	1.90336	0.928548
C05C10.3	C05C10.3	C05C10.3.2	1,43511	0,745448	1.92516	0.944982
C05C10.3	C05C10.3	C05C10.3.3	1,38087	0,738233	1.87051	0.903429
C05C10.4	C05C10.4	C05C10.4	1,69774	0,968918	1.7522	0.809169
C05C10.5	C05C10.5	C05C10.5a	4,69815	2,85929	1.64312	0.716436
C05C10.5	C05C10.5	C05C10.5b	5,88081	3,20077	1.83731	0.877596
C05C10.5	C05C10.5	C05C10.5c.1	5,91465	3,11805	1.89691	0.923649
C05C10.5	C05C10.5	C05C10.5c.2	5,92235	3,10423	1.90783	0.931934
C05C10.5	C05C10.5	C05C10.5c.3	5,30772	2,70148	1.96475	0.974342
ufd-3	C05C10.6	C05C10.6a	2,32189	1,10755	2.09642	1.06793
ufd-3	C05C10.6	C05C10.6b	2,34312	1,15114	2.03548	1.02537
C05C10.7	C05C10.7	C05C10.7	0,324989	0,411513	0.789742	-0.340547
C05C12.1	C05C12.1	C05C12.1	0,015452	0,002815	5.48934	2.45663	1
gtl-1	C05C12.3	C05C12.3	0,464154	0,20523	2.26163	1.17736
C05C12.4	C05C12.4	C05C12.4	0,584218	0,284397	2.05423	1.0386
C05C12.5	C05C12.5	C05C12.5	0,061177	0,017986	3.40139	1.76612	1
C05C12.6	C05C12.6	C05C12.6	0,077299	0,046078	1.67758	0.746379
C05C8.1	C05C8.1	C05C8.1	0,937137	0,368252	2.54483	1.34757
C05C8.2	C05C8.2	C05C8.2	0,784239	0,567824	1.38113	0.46585
fkb-3	C05C8.3	C05C8.3	0,670024	0,496212	1.35028	0.433256
gei-6	C05C8.4	C05C8.4	0,621103	0,454785	1.36571	0.449648
C05C8.5	C05C8.5	C05C8.5	0,546149	0,510855	1.06909	0.0963807
C05C8.6	C05C8.6	C05C8.6	1,31808	0,767875	1.71653	0.779495
C05C8.7	C05C8.7	C05C8.7.1	0,985086	0,512718	1.9213	0.942084
C05C8.7	C05C8.7	C05C8.7.2	1,14284	0,432361	2.64325	1.40232
C05C8.7	C05C8.7	C05C8.7.3	1,12795	0,543703	2.07457	1.05281
C05C8.7	C05C8.7	C05C8.7.4	1,12544	0,479515	2.34704	1.23084
C05C8.8	C05C8.8	C05C8.8	0,003277	0,014208	0.230662	-2.11615		1
C05C8.9	C05C8.9	C05C8.9a	0,741696	0,558461	1.32811	0.409371
C05C8.9	C05C8.9	C05C8.9b.1	0,58595	0,537224	1.0907	0.125254
C05C8.9	C05C8.9	C05C8.9b.2	0,603993	0,520987	1.15932	0.213284
C05C9.1	C05C9.1	C05C9.1	0,021844	0,004763	4.58619	2.19729	1
C05C9.2	C05C9.2	C05C9.2	0,012185	0,001169	10.4238	3.38181	1
C05C9.3	C05C9.3	C05C9.3	0,024974	0,004737	5.27213	2.39839	1
C05D10.1	C05D10.1	C05D10.1a.1	1,11655	0,710076	1.57244	0.653003
C05D10.1	C05D10.1	C05D10.1a.2	1,29857	0,749129	1.73344	0.793638
C05D10.1	C05D10.1	C05D10.1b	1,38132	0,773494	1.78582	0.836586
C05D10.1	C05D10.1	C05D10.1c.1	1,26581	0,717839	1.76336	0.818329
C05D10.1	C05D10.1	C05D10.1c.2	1,26117	0,703585	1.79249	0.841966
C05D10.1	C05D10.1	C05D10.1c.3	1,29857	0,749129	1.73344	0.793638
C05D10.1	C05D10.1	C05D10.1c.4	1,26647	0,717902	1.76413	0.818954
C05D10.2	C05D10.2	C05D10.2a	0,134002	0,042697	3.13844	1.65005
C05D10.2	C05D10.2	C05D10.2b	0,049223	0,002478	19.864	4.31209	1
C05D10.2	C05D10.2	C05D10.2c	0,134191	0,041818	3.20893	1.68209
C05D10.3	C05D10.3	C05D10.3	0,050427	0,029135	1.7308	0.791443
C05D10.4	C05D10.4	C05D10.4a	0,337377	0,206659	1.63253	0.707109
C05D10.4	C05D10.4	C05D10.4b	0,305993	0,188142	1.62639	0.701677
C05D10.4	C05D10.4	C05D10.4c	0,404585	0,213238	1.89734	0.923978
C05D11.1	C05D11.1	C05D11.1	1,86538	0,864136	2.15866	1.11014
C05D11.10	C05D11.10	C05D11.10	1,30629	1,499	0.871441	-0.198525
mel-32	C05D11.11	C05D11.11a.1	10,3702	3,96766	2.61368	1.38608
mel-32	C05D11.11	C05D11.11a.2	10,3763	3,96668	2.61587	1.38729
mel-32	C05D11.11	C05D11.11a.3	10,1021	3,95512	2.55418	1.35286
mel-32	C05D11.11	C05D11.11b.1	9,46693	3,80299	2.48934	1.31576
mel-32	C05D11.11	C05D11.11b.2	9,53479	3,80643	2.50492	1.32476
mel-32	C05D11.11	C05D11.11b.3	10,1021	3,95512	2.55418	1.35286
let-721	C05D11.12	C05D11.12.1	1,81783	1,12778	1.61187	0.688732
let-721	C05D11.12	C05D11.12.2	1,83717	1,06445	1.72593	0.787377
C05D11.13	C05D11.13	C05D11.13	0,241898	0,208194	1.16189	0.21647
vps-16	C05D11.2	C05D11.2.1	0,873238	0,479564	1.8209	0.864652
vps-16	C05D11.2	C05D11.2.2	0,864525	0,479025	1.80476	0.851807
tag-170	C05D11.3	C05D11.3	2,3778	1,11188	2.13854	1.09663
let-756	C05D11.4	C05D11.4	0,400291	0,25683	1.55858	0.640235
C05D11.5	C05D11.5	C05D11.5	0,242104	0,088361	2.73994	1.45415
nas-4	C05D11.6	C05D11.6	0,023746	0,006307	3.76507	1.91268	1
C05D11.7	C05D11.7	C05D11.7a.1	1,80702	0,924439	1.95472	0.966962
C05D11.7	C05D11.7	C05D11.7a.2	2,07677	0,892383	2.32722	1.21861
C05D11.7	C05D11.7	C05D11.7b	1,84534	0,863414	2.13726	1.09576
C05D11.8	C05D11.8	C05D11.8	0,361727	0,160686	2.25114	1.17066
C05D11.9	C05D11.9	C05D11.9	0,385832	0,233369	1.65331	0.72536
C05D12.1	C05D12.1	C05D12.1	0,099253	0,026033	3.81259	1.93077	1
C05D12.2	C05D12.2	C05D12.2	0,090011	0,067701	1.32954	0.410927
C05D12.3	C05D12.3	C05D12.3a.1	0,331627	0,030968	10.7087	3.42071	1
C05D12.3	C05D12.3	C05D12.3a.2	0,366478	0,032868	11.15	3.47897	1
C05D12.3	C05D12.3	C05D12.3c	0,36402	0,033321	10.9246	3.44951	1
C05D12.4	C05D12.4	C05D12.4	0,052546	0,030098	1.74583	0.803911
C05D12.5	C05D12.5	C05D12.5	0,010612	0,010872	0.976104	-0.0348936
C05D12.7	C05D12.7	C05D12.7	0,20832	0,224223	0.929075	-0.106133
C05D2.10	C05D2.10	C05D2.10a.1	2,31533	1,08285	2.13818	1.09638
C05D2.10	C05D2.10	C05D2.10a.2	2,34952	1,21776	1.92938	0.948136
C05D2.10	C05D2.10	C05D2.10b	2,34082	1,20177	1.94781	0.961853
daf-4	C05D2.1	C05D2.1a	0,711774	0,498618	1.42749	0.513484
daf-4	C05D2.1	C05D2.1c	0,720552	0,334313	2.15532	1.1079
daf-4	C05D2.1	C05D2.1d	0,67875	0,326742	2.07733	1.05473
C05D2.3	C05D2.3	C05D2.3	0,007567	0,002243	3.3735	1.75425	1
bas-1	C05D2.4	C05D2.4a	0,266414	0,111328	2.39305	1.25885
bas-1	C05D2.4	C05D2.4b	0,262591	0,104704	2.50794	1.3265
gak-1	C05D2.5	C05D2.5	1,22537	0,803091	1.52582	0.609582
C05D2.6	C05D2.6	C05D2.6a.1	0,844635	0,560715	1.50635	0.59106
C05D2.6	C05D2.6	C05D2.6a.2	0,914165	0,511682	1.78659	0.837207
C05D2.6	C05D2.6	C05D2.6b	0,936003	0,489679	1.91146	0.934677
C05D2.8	C05D2.8	C05D2.8	0,908186	0,6467	1.40434	0.489891
snx-1	C05D9.1	C05D9.1.1	1,32966	0,958461	1.38729	0.472266
snx-1	C05D9.1	C05D9.1.2	1,35075	0,959627	1.40758	0.493215
lmp-2	C05D9.2	C05D9.2.1	0,414036	0,235478	1.75828	0.814164
lmp-2	C05D9.2	C05D9.2.2	0,257302	0,158416	1.62422	0.699745
C05D9.3	C05D9.3	C05D9.3	0,430136	0,187035	2.29976	1.20148
C05D9.4	C05D9.4	C05D9.4	0,006643	0,003699	1.79602	0.844804
ife-4	C05D9.5	C05D9.5	0,206251	0,255989	0.805703	-0.311681
C05D9.7	C05D9.7	C05D9.7	0,429964	0,227518	1.8898	0.918235
C05D9.9	C05D9.9	C05D9.9a	0,24837	0,674903	0.368008	-1.44219
C05D9.9	C05D9.9	C05D9.9b	0,244803	0,458575	0.533834	-0.905536
C05E11.1	C05E11.1	C05E11.1	0,641144	0,790009	0.811565	-0.301221
C05E11.2	C05E11.2	C05E11.2	0,000386	0
C05E11.3	C05E11.3	C05E11.3	0,330074	0,130098	2.53712	1.34319
amt-1	C05E11.4	C05E11.4	0,073043	0,010871	6.71903	2.74825	1
amt-4	C05E11.5	C05E11.5	0,350423	0,139503	2.51194	1.3288
C05E11.6	C05E11.6	C05E11.6	0,092273	0,150352	0.613712	-0.704367
C05E11.7	C05E11.7	C05E11.7	0,007625	0,000335	22.7623	4.50857	1
flp-12	C05E11.8	C05E11.8	3,39229	1,76694	1.91987	0.941006
srp-2	C05E4.1	C05E4.1.1	0,143228	0,242234	0.59128	-0.758088
srp-2	C05E4.1	C05E4.1.2	0,147737	0,236391	0.624969	-0.678144
srj-25	C05E4.10	C05E4.10	0,000955	0
srj-24	C05E4.11	C05E4.11	0,00226	0,00047	4.80762	2.26532	1
C05E4.12	C05E4.12	C05E4.12	0,010046	0,005297	1.89653	0.923359
str-262	C05E4.13	C05E4.13	0,002434	0,000948	2.56739	1.36031
srh-2	C05E4.14	C05E4.14a	0,127473	0,126036	1.0114	0.0163558
srh-2	C05E4.14	C05E4.14b	0,114026	0,09978	1.14277	0.19254
str-20	C05E4.2	C05E4.2	0	0
srp-1	C05E4.3	C05E4.3	0,297247	0,44613	0.666279	-0.585802
sri-4	C05E4.4	C05E4.4	0,001667	0,000331	5.0371	2.33259	1
str-134	C05E4.6	C05E4.6	0	0
C05E4.7	C05E4.7	C05E4.7	0,000666	0,001259	0.528943	-0.918816
gei-7	C05E4.9	C05E4.9a.1	24,1789	15,4946	1.56047	0.641983
gei-7	C05E4.9	C05E4.9a.2	25,0111	16,0782	1.55559	0.637463
gei-7	C05E4.9	C05E4.9a.3	24,7807	15,9468	1.55396	0.63595
gei-7	C05E4.9	C05E4.9b.1	23,9448	15,4459	1.55024	0.632488
gei-7	C05E4.9	C05E4.9b.2	24,3177	15,5804	1.56079	0.642275
C05E7.1	C05E7.1	C05E7.1	0,147194	0,076293	1.92933	0.948096
C05E7.2	C05E7.2	C05E7.2	0,076323	0,032667	2.3364	1.22429
C05E7.3	C05E7.3	C05E7.3	0,132759	0,141039	0.941293	-0.0872845
C05E7.4	C05E7.4	C05E7.4	0,013828	0,005853	2.36248	1.2403
C05G5.1	C05G5.1	C05G5.1	0,151178	0,089157	1.69564	0.761828
C05G5.2	C05G5.2	C05G5.2	0,28536	0,315138	0.905508	-0.143201
C05G5.3	C05G5.3	C05G5.3	0,12678	0,118002	1.07439	0.103516
C05G5.4	C05G5.4	C05G5.4	2,53843	2,49124	1.01894	0.0270725
C05G5.5	C05G5.5	C05G5.5	0,039387	0,054341	0.72481	-0.464325
nhr-76	C05G6.1	C05G6.1	0,269328	0,186968	1.4405	0.526573
ckk-1	C05H8.1	C05H8.1a	0,166214	0,091425	1.81804	0.862381
ckk-1	C05H8.1	C05H8.1b	0,171939	0,108922	1.57855	0.658601
cdc-48.1	C06A1.1	C06A1.1.1	7,2159	3,5387	2.03914	1.02796
cdc-48.1	C06A1.1	C06A1.1.2	7,25806	3,53928	2.05072	1.03613
C06A1.2	C06A1.2	C06A1.2	0,148439	0,257567	0.576312	-0.795078
C06A1.3	C06A1.3	C06A1.3	0,048718	0,021698	2.24529	1.1669
C06A1.5	C06A1.5	C06A1.5	3,56369	4,06231	0.877257	-0.188928
C06A1.6	C06A1.6	C06A1.6	0	0,003038	0
C06A1.7	C06A1.7	C06A1.7	0	0
C06A12.3	C06A12.3	C06A12.3	0,524028	1,26081	0.415628	-1.26664
gcy-27	C06A12.4	C06A12.4	0,006277	0,000689	9.11094	3.1876	1
C06A12.5	C06A12.5	C06A12.5	0,037695	0,002077	18.1489	4.18181	1
C06A12.8	C06A12.8	C06A12.8	0,000702	0,00139	0.505099	-0.985361
C06A5.1	C06A5.1	C06A5.1	0,324501	0,199384	1.62752	0.702673
C06A5.10	C06A5.10	C06A5.10	nan	nan
sir-2.4	C06A5.11	C06A5.11	0,382514	0,270131	1.41603	0.501853
C06A5.12	C06A5.12	C06A5.12	0,088742	0,17025	0.521246	-0.939963
C06A5.2	C06A5.2	C06A5.2	0,012538	0,000891	14.0717	3.81473	1
C06A5.3	C06A5.3	C06A5.3a	0,764593	0,427167	1.78992	0.839892
C06A5.3	C06A5.3	C06A5.3b	0,779785	0,440241	1.77127	0.824783
C06A5.4	C06A5.4	C06A5.4	0,057482	0,044189	1.30083	0.379433
C06A5.5	C06A5.5	C06A5.5	nan	nan
C06A5.6	C06A5.6	C06A5.6	0,857992	0,456755	1.87845	0.909544
tmd-1	C06A5.7	C06A5.7a	1,3902	0,741594	1.87461	0.906591
tmd-1	C06A5.7	C06A5.7b	1,85995	0,780722	2.38235	1.25238
C06A5.8	C06A5.8	C06A5.8a	0,688648	0,352871	1.95156	0.964626
C06A5.8	C06A5.8	C06A5.8b	0,72633	0,329875	2.20183	1.13871
rnf-1	C06A5.9	C06A5.9	0,731789	0,41526	1.76224	0.817413
C06A6.2	C06A6.2	C06A6.2a	0,236882	0,143633	1.64922	0.721781
C06A6.2	C06A6.2	C06A6.2b	0,23625	0,143584	1.64538	0.718419
C06A6.3	C06A6.3	C06A6.3	0,898493	0,731419	1.22842	0.296809
C06A6.4	C06A6.4	C06A6.4a.1	1,6386	0,825111	1.98591	0.989804
C06A6.4	C06A6.4	C06A6.4a.2	1,63768	0,821777	1.99285	0.994835
C06A6.4	C06A6.4	C06A6.4b	1,58632	0,928039	1.70932	0.773426
C06A6.5	C06A6.5	C06A6.5	0,979643	0,630703	1.55326	0.635295
C06A6.7	C06A6.7	C06A6.7	0,02543	0,002663	9.54946	3.25542	1
C06A8.1	C06A8.1	C06A8.1a.1	7,97635	1,73557	4.59581	2.20032	1
C06A8.1	C06A8.1	C06A8.1a.2	8,64547	1,78455	4.84462	2.27638	1
C06A8.1	C06A8.1	C06A8.1b	8,00487	1,66301	4.81348	2.26708	1
C06A8.2	C06A8.2	C06A8.2	0,918699	0,791792	1.16028	0.214471
C06A8.3	C06A8.3	C06A8.3.1	8,08659	14,6057	0.55366	-0.852928
C06A8.3	C06A8.3	C06A8.3.2	8,95096	13,6253	0.656937	-0.606174
skr-17	C06A8.4	C06A8.4	1,14061	0,658563	1.73197	0.792412
C06A8.5	C06A8.5	C06A8.5	0,662191	0,501704	1.31988	0.400411
C06A8.6	C06A8.6	C06A8.6	0,023693	0,003689	6.42272	2.68318	1
srh-39	C06A8.7	C06A8.7	0,001781	0,000369	4.82672	2.27104	1
C06A8.8	C06A8.8	C06A8.8a	0,144556	0,15757	0.917408	-0.124364
C06A8.8	C06A8.8	C06A8.8b.1	0,187839	0,122164	1.5376	0.620677
C06A8.8	C06A8.8	C06A8.8b.2	0,181205	0,117599	1.54087	0.623747
glr-4	C06A8.9	C06A8.9	0,098312	0,035379	2.77883	1.47448
C06B3.1	C06B3.1	C06B3.1	0	0
str-250	C06B3.10	C06B3.10	0	0,000353	0
srx-42	C06B3.11	C06B3.11	0	0
srxa-11	C06B3.12	C06B3.12	0	0
srxa-12	C06B3.13	C06B3.13	0,001343	0,002003	0.670464	-0.576768
srxa-13	C06B3.14	C06B3.14	0,000628	0
C06B3.2	C06B3.2	C06B3.2	0,00789	0,002659	2.96744	1.56922
cyp-35C1	C06B3.3	C06B3.3	0,264767	0,030303	8.73732	3.12719	1
stdh-1	C06B3.4	C06B3.4	0,72159	0,481607	1.4983	0.583323
C06B3.5	C06B3.5	C06B3.5	0,003481	0,002433	1.43089	0.516915
C06B3.6	C06B3.6	C06B3.6.1	1,44479	3,33616	0.43307	-1.20733
C06B3.6	C06B3.6	C06B3.6.2	2,18992	2,61566	0.837234	-0.256297
C06B3.6	C06B3.6	C06B3.6.3	2,21713	2,6552	0.835014	-0.260127
C06B3.7	C06B3.7	C06B3.7	0,079856	0,080304	0.994421	-0.00807104
gcy-32	C06B3.8	C06B3.8.1	0,03783	0,009641	3.92383	1.97226	1
gcy-32	C06B3.8	C06B3.8.2	0,038175	0,009672	3.94695	1.98074	1
str-252	C06B3.9	C06B3.9	0,002524	0
nhr-150	C06B8.1	C06B8.1	0,017501	0,016291	1.07427	0.103354
srh-218	C06B8.10	C06B8.10	0	0,000342	0
C06B8.11	C06B8.11	C06B8.11	0	0
C06B8.2	C06B8.2	C06B8.2a	0,103515	0,043146	2.39918	1.26254
C06B8.2	C06B8.2	C06B8.2b	0,100248	0,042791	2.34274	1.22819
nhr-151	C06B8.3	C06B8.3	0,026541	0,010001	2.65386	1.40809
str-264	C06B8.4	C06B8.4	0,007467	0,007616	0.980402	-0.028555
srh-219	C06B8.6	C06B8.6	0,000522	0
C06B8.7	C06B8.7	C06B8.7	0,179642	0,143509	1.25178	0.323983
rpl-38	C06B8.8	C06B8.8.1	164,041	581,442	0.282128	-1.82558		1
rpl-38	C06B8.8	C06B8.8.2	149,144	520,017	0.286806	-1.80185		1
rpl-38	C06B8.8	C06B8.8.3	168,933	589,468	0.286586	-1.80296		1
srw-21	C06B8.9	C06B8.9	0	0
mel-11	C06C3.1	C06C3.1a	2,41189	1,25005	1.92943	0.948178
mel-11	C06C3.1	C06C3.1b	2,66282	1,34335	1.98222	0.98712
mel-11	C06C3.1	C06C3.1c	2,38346	1,19167	2.0001	1.00007
mel-11	C06C3.1	C06C3.1d	2,63644	1,3269	1.98692	0.990532
C06C3.3	C06C3.3	C06C3.3	0,008512	0,001809	4.70545	2.23433	1
C06C3.4	C06C3.4	C06C3.4	0,043939	0,046072	0.953709	-0.0683783
srh-48	C06C3.6	C06C3.6	0,035873	0,014922	2.404	1.26544
C06C3.7	C06C3.7	C06C3.7	0,018585	0,054284	0.342361	-1.54641		1
C06C3.8	C06C3.8	C06C3.8	0,015653	0,003239	4.8326	2.2728	1
C06C6.1	C06C6.1	C06C6.1	0	0
str-233	C06C6.2	C06C6.2	0	0,000345	0
str-231	C06C6.3	C06C6.3	0	0
nhr-63	C06C6.4	C06C6.4	0,095158	0,055993	1.69947	0.765083
nhr-50	C06C6.5	C06C6.5a	0,125214	0,108028	1.15909	0.212991
nhr-50	C06C6.5	C06C6.5b.1	0,262797	0,255079	1.03026	0.0430047
nhr-50	C06C6.5	C06C6.5b.2	0,108621	0,095973	1.13179	0.178603
C06C6.6	C06C6.6	C06C6.6	0,001452	0,000225	6.45391	2.69017	1
C06C6.7	C06C6.7	C06C6.7	0,002422	0
C06C6.8	C06C6.8	C06C6.8	0,001748	0,011089	0.157602	-2.66564		1
C06C6.9	C06C6.9	C06C6.9	0,000244	0
C06E1.1	C06E1.1	C06E1.1	0,2152	0,25506	0.843723	-0.245159
rha-2	C06E1.10	C06E1.10	0,317771	0,199629	1.59181	0.670666
C06E1.11	C06E1.11	C06E1.11	0,044104	0,048806	0.903651	-0.146162
C06E1.3	C06E1.3	C06E1.3	0,122625	0,032358	3.78963	1.92206	1
glr-1	C06E1.4	C06E1.4	0,036568	0,008914	4.10227	2.03642	1
C06E1.5	C06E1.5	C06E1.5	0,060851	0,168841	0.360406	-1.47231
C06E1.6	C06E1.6	C06E1.6	0,358086	0,648386	0.552273	-0.856547
C06E1.7	C06E1.7	C06E1.7	0,01056	0,001431	7.37918	2.88346	1
C06E1.8	C06E1.8	C06E1.8	0,083784	0,031538	2.6566	1.40958
C06E1.9	C06E1.9	C06E1.9	0,403253	0,235302	1.71377	0.777172
C06E2.1	C06E2.1	C06E2.1	0,056797	0,01211	4.69011	2.22962	1
C06E2.2	C06E2.2	C06E2.2	0,002072	0
ubc-21	C06E2.3	C06E2.3	0,021282	0,013022	1.63429	0.708662
C06E2.5	C06E2.5	C06E2.5.1	0,232667	0,59749	0.389407	-1.36065
C06E2.5	C06E2.5	C06E2.5.2	0,234216	0,48967	0.478314	-1.06397
ubc-22	C06E2.7	C06E2.7	0,034827	0,029139	1.19521	0.257267
ins-9	C06E2.8	C06E2.8	0,008874	0,003212	2.76278	1.46612
C06E2.9	C06E2.9	C06E2.9	0,078384	0,204032	0.384177	-1.38016
C06E4.1	C06E4.1	C06E4.1	0,002342	0
C06E4.2	C06E4.2	C06E4.2	0,25262	0,432282	0.584387	-0.775004
C06E4.3	C06E4.3	C06E4.3	0,012883	0,002038	6.32134	2.66023	1
C06E4.4	C06E4.4	C06E4.4	0	0
C06E4.5	C06E4.5	C06E4.5	0	0
C06E4.6	C06E4.6	C06E4.6	0,001014	0,008329	0.121796	-3.03746		1
C06E4.7	C06E4.7	C06E4.7	0,038288	0,015567	2.45954	1.29839
C06E4.8	C06E4.8	C06E4.8	0,070753	0,054501	1.29819	0.376505
C06E7.1	C06E7.1	C06E7.1a.1	1,317	0,546237	2.41104	1.26966
C06E7.1	C06E7.1	C06E7.1a.2	1,79027	0,527365	3.39475	1.7633	1
C06E7.1	C06E7.1	C06E7.1b	1,32496	0,542816	2.4409	1.28741
C06E7.1	C06E7.1	C06E7.1c	0,272274	0,10317	2.63908	1.40004
C06E7.1	C06E7.1	C06E7.1d	0,011641	0
C06E7.2	C06E7.2	C06E7.2.1	0,177574	0,077077	2.30385	1.20405
C06E7.2	C06E7.2	C06E7.2.2	0,188755	0,080831	2.33518	1.22353
C06E7.3	C06E7.3	C06E7.3a	3,20928	1,28429	2.49887	1.32128
C06E7.3	C06E7.3	C06E7.3b.1	1,51319	0,768773	1.96832	0.976964
C06E7.3	C06E7.3	C06E7.3b.2	2,45941	1,19957	2.05024	1.03579
C06E7.3	C06E7.3	C06E7.3b.3	1,41487	0,56864	2.48816	1.31508
C06E7.3	C06E7.3	C06E7.3b.4	3,20928	1,28429	2.49887	1.32128
C06E7.4	C06E7.4	C06E7.4	0,565706	0,50296	1.12475	0.169609
spe-27	C06E7.6	C06E7.6	0,003607	0,000503	7.17141	2.84226	1
srv-17	C06E7.7	C06E7.7	0	0
prk-1	C06E8.3	C06E8.3a	0,755676	0,363376	2.0796	1.0563
prk-1	C06E8.3	C06E8.3b	0,475665	0,218821	2.17376	1.12019
prk-1	C06E8.3	C06E8.3c	0,74756	0,346239	2.15909	1.11042
C06E8.5	C06E8.5	C06E8.5	0,068579	0,025581	2.68084	1.42269
C06G1.1	C06G1.1	C06G1.1	0,207523	0,046503	4.46257	2.15788	1
C06G1.2	C06G1.2	C06G1.2	0,168171	0,033058	5.08715	2.34686	1
ain-1	C06G1.4	C06G1.4.1	2,02135	1,11129	1.81892	0.863084
ain-1	C06G1.4	C06G1.4.2	3,165	1,4221	2.22558	1.15418
C06G1.5	C06G1.5	C06G1.5	0,344136	0,113081	3.04327	1.60562
cogc-2	C06G3.10	C06G3.10	0,556001	0,340002	1.63529	0.709544
tin-9.1	C06G3.11	C06G3.11a	5,32893	24,4368	0.21807	-2.19714		1
tin-9.1	C06G3.11	C06G3.11b.1	4,55853	21,306	0.213955	-2.22462		1
tin-9.1	C06G3.11	C06G3.11b.2	4,85563	22,5371	0.215451	-2.21457		1
C06G3.12	C06G3.12	C06G3.12.1	0,034286	0,001263	27.1467	4.76271	1
C06G3.12	C06G3.12	C06G3.12.2	0,035691	0,005051	7.06609	2.82091	1
nhr-105	C06G3.1	C06G3.1a.1	0,345238	0,183604	1.88034	0.910994
nhr-105	C06G3.1	C06G3.1a.2	0,328554	0,176586	1.86059	0.89576
nhr-105	C06G3.1	C06G3.1b	0,337312	0,186587	1.8078	0.854235
klp-18	C06G3.2	C06G3.2	1,25256	0,856845	1.46183	0.547774
C06G3.3	C06G3.3	C06G3.3	0,876938	14,5907	0.0601025	-4.05643		1
C06G3.4	C06G3.4	C06G3.4	0,000662	0
C06G3.5	C06G3.5	C06G3.5a	2,27543	1,80661	1.2595	0.332854
C06G3.5	C06G3.5	C06G3.5b.1	1,93855	1,63961	1.18232	0.241625
C06G3.5	C06G3.5	C06G3.5b.2	2,08604	1,54899	1.34671	0.429439
C06G3.6	C06G3.6	C06G3.6	0,411523	0,410571	1.00232	0.00334134
trxr-1	C06G3.7	C06G3.7	1,14318	0,677051	1.68847	0.755716
C06G3.8	C06G3.8	C06G3.8	0,772422	1,44659	0.533961	-0.905195
C06G3.9	C06G3.9	C06G3.9.1	0,867583	0,70769	1.22594	0.293884
C06G3.9	C06G3.9	C06G3.9.2	0,872125	0,71151	1.22574	0.293651
C06G4.1	C06G4.1	C06G4.1	0,57429	0,275413	2.0852	1.06018
clp-1	C06G4.2	C06G4.2a.1	2,83889	1,3971	2.03199	1.02289
clp-1	C06G4.2	C06G4.2a.2	2,84791	1,3998	2.03451	1.02468
clp-1	C06G4.2	C06G4.2b.1	3,00166	1,5174	1.97816	0.984159
clp-1	C06G4.2	C06G4.2b.2	2,98123	1,50292	1.98363	0.988139
clp-1	C06G4.2	C06G4.2b.3	2,94162	1,49049	1.97359	0.980824
clp-1	C06G4.2	C06G4.2c	0,371008	0,806208	0.460189	-1.1197
clp-1	C06G4.2	C06G4.2d	3,04169	1,51223	2.01139	1.0082
C06G4.4	C06G4.4	C06G4.4	0,040095	0,04917	0.815442	-0.294345
C06G4.5	C06G4.5	C06G4.5	0,093593	0,041451	2.25792	1.175
C06G4.6	C06G4.6	C06G4.6	0,033474	0,027887	1.20033	0.263427
C06G8.1	C06G8.1	C06G8.1	0,381666	0,24272	1.57245	0.653018
opt-1	C06G8.2	C06G8.2	0,450118	0,473793	0.950031	-0.0739536
C06G8.3	C06G8.3	C06G8.3b.1	0,541519	0,396179	1.36685	0.45086
C06G8.3	C06G8.3	C06G8.3b.2	0,464819	0,281423	1.65167	0.723929
srd-7	C06G8.4	C06G8.4	0,001051	0
atp-5	C06H2.1	C06H2.1.1	18,3839	10,0866	1.82261	0.866003
atp-5	C06H2.1	C06H2.1.2	18,1792	9,92483	1.83169	0.873174
C06H2.2	C06H2.2	C06H2.2	0,288858	0,138175	2.09052	1.06386
C06H2.3	C06H2.3	C06H2.3	0,216849	0,12809	1.69294	0.759533
tag-330	C06H2.4	C06H2.4	0,122301	0,0847	1.44393	0.530002
C06H2.5	C06H2.5	C06H2.5	0,15132	0,030473	4.96571	2.312	1
C06H2.6	C06H2.6	C06H2.6.1	3,22973	4,89211	0.660192	-0.599043
C06H2.6	C06H2.6	C06H2.6.2	3,43784	4,53373	0.758281	-0.399196
C06H2.7	C06H2.7	C06H2.7	0,36255	0,403451	0.898622	-0.154213
C06H5.1	C06H5.1	C06H5.1	0,163909	0,157527	1.04051	0.0572959
C06H5.2	C06H5.2	C06H5.2	0,035956	0,029454	1.22075	0.287765
C06H5.6	C06H5.6	C06H5.6	0,285613	0,14691	1.94414	0.959129
C06H5.7	C06H5.7	C06H5.7.1	1,62238	0,940743	1.72457	0.786239
C06H5.7	C06H5.7	C06H5.7.2	1,65784	0,807225	2.05375	1.03826
C06H5.8	C06H5.8	C06H5.8	0,095054	0,089533	1.06166	0.0863233
ham-2	C07A12.1	C07A12.1a	0,262485	0,194377	1.35039	0.433377
ham-2	C07A12.1	C07A12.1b	0,304954	0,222625	1.36981	0.453976
ham-2	C07A12.1	C07A12.1c	0,307874	0,2434	1.26489	0.339011
C07A12.2	C07A12.2	C07A12.2	0,226475	0,117647	1.92504	0.944887
nhr-35	C07A12.3	C07A12.3a	0,818097	0,597239	1.3698	0.453964
nhr-35	C07A12.3	C07A12.3b	0,716773	0,454732	1.57625	0.6565
pdi-2	C07A12.4	C07A12.4a.1	14,74	11,7677	1.25258	0.324904
pdi-2	C07A12.4	C07A12.4a.2	15,0989	11,4242	1.32166	0.40235
pdi-2	C07A12.4	C07A12.4a.3	14,9972	11,5668	1.29657	0.374703
pdi-2	C07A12.4	C07A12.4b	14,4942	11,8105	1.22723	0.295406
spr-3	C07A12.5	C07A12.5a	0,270235	0,235473	1.14763	0.198653
spr-3	C07A12.5	C07A12.5b	0,276095	0,236145	1.16918	0.225492
C07A12.7	C07A12.7	C07A12.7a.1	1,23994	0,914066	1.35651	0.4399
C07A12.7	C07A12.7	C07A12.7a.2	1,25523	0,924122	1.35829	0.441797
C07A12.7	C07A12.7	C07A12.7b	1,25907	0,85777	1.46784	0.553696
C07A12.7	C07A12.7	C07A12.7c.1	1,25907	0,85777	1.46784	0.553696
C07A12.7	C07A12.7	C07A12.7c.2	0,789351	0,816196	0.96711	-0.0482487
C07A4.1	C07A4.1	C07A4.1	0,117279	0,094545	1.24046	0.310872
C07A4.2	C07A4.2	C07A4.2	0,036448	0,019156	1.90269	0.928039
C07A4.3	C07A4.3	C07A4.3	0,022063	0,06414	0.343977	-1.53961		1
C07A9.1	C07A9.1	C07A9.1	0,006013	0,003322	1.8101	0.856069
C07A9.10	C07A9.10	C07A9.10	0	0
ncx-7	C07A9.11	C07A9.11	0,196113	0,068951	2.84424	1.50804
C07A9.12	C07A9.12	C07A9.12	0,156413	0,05677	2.75521	1.46216
C07A9.13	C07A9.13	C07A9.13	0,020606	0,00904	2.27947	1.1887
C07A9.2	C07A9.2	C07A9.2.1	2,56319	2,21068	1.15946	0.21345
C07A9.2	C07A9.2	C07A9.2.2	1,64814	5,1459	0.320282	-1.64258		1
tlk-1	C07A9.3	C07A9.3a	4,40789	2,4453	1.8026	0.850077
tlk-1	C07A9.3	C07A9.3b	4,51995	2,44201	1.85091	0.888238
tlk-1	C07A9.3	C07A9.3c	4,55819	2,45457	1.85702	0.892991
ncx-6	C07A9.4	C07A9.4	0,0835	0,005272	15.8385	3.98536	1
C07A9.5	C07A9.5	C07A9.5	0,014394	0
ugt-60	C07A9.6	C07A9.6.1	0,122636	0,042132	2.91076	1.54139
ugt-60	C07A9.6	C07A9.6.2	0,123118	0,041942	2.93543	1.55357
C07A9.7	C07A9.7	C07A9.7a	0,608835	0,321982	1.8909	0.919071
C07A9.7	C07A9.7	C07A9.7b	0,598184	0,309445	1.93309	0.950906
C07A9.8	C07A9.8	C07A9.8	0,111084	0,030259	3.67111	1.87621	1
C07A9.9	C07A9.9	C07A9.9	0,427614	0,183506	2.33025	1.22048
C07B5.2	C07B5.2	C07B5.2	0,004261	0
C07B5.3	C07B5.3	C07B5.3	0,274979	0,224547	1.22459	0.292304
C07B5.4	C07B5.4	C07B5.4a	0,192983	0,140816	1.37046	0.454662
C07B5.4	C07B5.4	C07B5.4b.1	0,161924	0,115234	1.40518	0.49075
C07B5.4	C07B5.4	C07B5.4b.2	0,161614	0,115265	1.40211	0.487598
nuc-1	C07B5.5	C07B5.5	4,00074	4,24598	0.942242	-0.0858307
C07B5.6	C07B5.6	C07B5.6	0,003381	0,004253	0.79502	-0.330937
C07C7.1	C07C7.1	C07C7.1	0,011128	0,002249	4.94784	2.3068	1
C07D10.1	C07D10.1	C07D10.1	0,035595	0,035091	1.01437	0.0205857
bath-44	C07D10.2	C07D10.2a	1,4747	0,604961	2.43768	1.28551
bath-44	C07D10.2	C07D10.2b.1	1,56351	0,752423	2.07797	1.05517
bath-44	C07D10.2	C07D10.2b.2	1,46822	0,620636	2.36567	1.24225
sre-3	C07D10.3	C07D10.3	0,005753	0,000618	9.30856	3.21856	1
nas-7	C07D10.4	C07D10.4	0,141808	0,124404	1.1399	0.188906
C07D10.5	C07D10.5	C07D10.5	0,340071	0,375562	0.905499	-0.143215
C07D10.6	C07D10.6	C07D10.6	0,021313	0,087742	0.242905	-2.04153		1
C07D8.2	C07D8.2	C07D8.2	0,010542	0
C07D8.3	C07D8.3	C07D8.3	0,014696	0,001151	12.768	3.67446	1
C07D8.5	C07D8.5	C07D8.5	0,006706	0,005519	1.21511	0.281082
C07D8.6	C07D8.6	C07D8.6.1	6,15037	4,33376	1.41918	0.505054
C07D8.6	C07D8.6	C07D8.6.2	6,92892	4,4512	1.55664	0.638436
C07E3.10	C07E3.10	C07E3.10	0,051374	0,105951	0.484884	-1.04429
C07E3.1	C07E3.1	C07E3.1a	0,724631	0,379753	1.90816	0.932185
C07E3.1	C07E3.1	C07E3.1b	0,613408	0,38704	1.58487	0.664364
pro-2	C07E3.2	C07E3.2.1	1,04679	0,48703	2.14933	1.10389
pro-2	C07E3.2	C07E3.2.2	1,0846	0,489979	2.21356	1.14637
C07E3.3	C07E3.3	C07E3.3	1,48866	1,165	1.27782	0.353684
C07E3.4	C07E3.4	C07E3.4	0,004459	0,000497	8.97169	3.16538	1
C07E3.5	C07E3.5	C07E3.5	0,024569	0,001946	12.6254	3.65826	1
C07E3.6	C07E3.6	C07E3.6	0,285643	0,267619	1.06735	0.0940326
C07E3.8	C07E3.8	C07E3.8	0,004457	0,005581	0.798635	-0.324392
C07E3.9	C07E3.9	C07E3.9	0,806027	1,0911	0.738729	-0.436883
tol-1	C07F11.1	C07F11.1	1,12632	0,581955	1.93541	0.952637
C07F11.2	C07F11.2	C07F11.2	0,033872	0,006735	5.02919	2.33033	1
try-2	C07G1.1	C07G1.1	0,023965	0,001571	15.2549	3.9312	1
C07G1.2	C07G1.2	C07G1.2	0,015976	0,002709	5.89738	2.56007	1
pct-1	C07G1.3	C07G1.3a.1	2,02622	0,911747	2.22235	1.15209
pct-1	C07G1.3	C07G1.3a.2	2,04947	0,924603	2.21659	1.14834
pct-1	C07G1.3	C07G1.3b	1,5454	0,676011	2.28606	1.19286
pct-1	C07G1.3	C07G1.3c	1,64231	0,756244	2.17167	1.1188
wsp-1	C07G1.4	C07G1.4a	0,910483	0,595138	1.52987	0.613408
wsp-1	C07G1.4	C07G1.4b	0,75347	0,405164	1.85967	0.895044
hgrs-1	C07G1.5	C07G1.5.1	1,95931	1,21116	1.61771	0.693956
hgrs-1	C07G1.5	C07G1.5.2	1,90289	1,18717	1.60288	0.680666
C07G1.6	C07G1.6	C07G1.6	0,013293	0,009524	1.39574	0.481027
C07G1.7	C07G1.7	C07G1.7	0,006823	0,025207	0.270685	-1.88531		1
glrx-22	C07G1.8	C07G1.8	1,29372	1,61374	0.80169	-0.318883
cej-1	C07G2.1	C07G2.1a.1	48,5428	18,3085	2.65138	1.40674
cej-1	C07G2.1	C07G2.1a.2	48,5566	18,3065	2.65242	1.40731
cej-1	C07G2.1	C07G2.1b.1	43,9841	16,4601	2.67216	1.41801
cej-1	C07G2.1	C07G2.1b.2	44,0617	16,2579	2.71017	1.43838
atf-7	C07G2.2	C07G2.2a.1	3,37715	1,94016	1.74066	0.799631
atf-7	C07G2.2	C07G2.2a.2	3,38815	1,91482	1.76944	0.823289
atf-7	C07G2.2	C07G2.2a.3	3,38022	1,92487	1.75608	0.812356
atf-7	C07G2.2	C07G2.2a.4	3,42564	1,99324	1.71863	0.781258
atf-7	C07G2.2	C07G2.2b	3,42251	1,99729	1.71358	0.777011
atf-7	C07G2.2	C07G2.2c.1	3,33582	1,96747	1.69549	0.7617
atf-7	C07G2.2	C07G2.2c.2	3,25137	1,98249	1.64004	0.713734
cct-5	C07G2.3	C07G2.3a	9,98431	4,51674	2.21051	1.14438
cct-5	C07G2.3	C07G2.3b.1	9,89429	4,45385	2.22151	1.15154
cct-5	C07G2.3	C07G2.3b.2	10,04	4,43833	2.26211	1.17767
cct-5	C07G2.3	C07G2.3b.3	9,90152	4,38046	2.26038	1.17657
cct-5	C07G2.3	C07G2.3b.4	9,74717	4,44545	2.19262	1.13265
cct-5	C07G2.3	C07G2.3b.5	9,83866	4,5369	2.16859	1.11675
cct-5	C07G2.3	C07G2.3b.6	9,84456	4,53688	2.1699	1.11763
cct-5	C07G2.3	C07G2.3b.7	9,98431	4,51674	2.21051	1.14438
C07G3.10	C07G3.10	C07G3.10	0,07053	0,015309	4.60709	2.20385	1
C07G3.2	C07G3.2	C07G3.2	0,096725	0,083441	1.15921	0.213137
str-227	C07G3.3	C07G3.3	0,004005	0,000337	11.8857	3.57116	1
str-226	C07G3.4	C07G3.4	0	0
str-228	C07G3.5	C07G3.5	0	0,000351	0
str-225	C07G3.6	C07G3.6	0,001206	0,000686	1.75848	0.814332
C07G3.8	C07G3.8	C07G3.8	0,017422	0,008254	2.11078	1.07778
ugt-64	C07G3.9	C07G3.9.1	0,527129	0,340869	1.54643	0.628939
ugt-64	C07G3.9	C07G3.9.2	0,524749	0,343129	1.52931	0.612876
C07H4.1	C07H4.1	C07H4.1	0,297388	0,128368	2.31668	1.21206
clh-5	C07H4.2	C07H4.2.1	1,00816	0,399407	2.52414	1.33579
clh-5	C07H4.2	C07H4.2.2	1,00552	0,402807	2.49628	1.31978
lig-4	C07H6.1	C07H6.1	0,367142	0,197944	1.85478	0.891246
C07H6.2	C07H6.2	C07H6.2	3,94784	12,3789	0.318917	-1.64875		1
C07H6.3	C07H6.3	C07H6.3.1	0,362683	0,17893	2.02695	1.01931
C07H6.3	C07H6.3	C07H6.3.2	0,362529	0,179352	2.02133	1.0153
C07H6.4	C07H6.4	C07H6.4	0,897802	0,551313	1.62848	0.703526
cgh-1	C07H6.5	C07H6.5.1	23,6822	10,7884	2.19515	1.13432
cgh-1	C07H6.5	C07H6.5.2	26,6775	10,8926	2.44914	1.29228
clk-2	C07H6.6	C07H6.6	0,631525	0,317899	1.98656	0.990271
lin-39	C07H6.7	C07H6.7.1	0,34027	0,154924	2.19637	1.13512
lin-39	C07H6.7	C07H6.7.2	0,338257	0,149606	2.26099	1.17695
cux-7	C07H6.8	C07H6.8.1	0,611093	0,442125	1.38217	0.466938
cux-7	C07H6.8	C07H6.8.2	0,630253	0,45359	1.38948	0.474542
C07H6.9	C07H6.9	C07H6.9	0,026439	0,012055	2.19319	1.13303
sod-3	C08A9.1	C08A9.1	0,374735	0,219429	1.70777	0.772117
C08A9.10	C08A9.10	C08A9.10	5,97377	10,192	0.586123	-0.770724
C08A9.3	C08A9.3	C08A9.3	0,000521	0
C08A9.6	C08A9.6	C08A9.6	0,172859	0,185749	0.930605	-0.103759
sdz-2	C08A9.7	C08A9.7	0,028409	0,039464	0.719876	-0.474179
C08A9.8	C08A9.8	C08A9.8	0,005256	0,009765	0.538273	-0.893589
C08A9.9	C08A9.9	C08A9.9	0,012023	0,004717	2.54882	1.34983
zyg-11	C08B11.1	C08B11.1	3,46508	2,0691	1.67468	0.743885
hda-2	C08B11.2	C08B11.2	0,548791	0,310868	1.76535	0.819955
C08B11.3	C08B11.3	C08B11.3	1,78568	1,20148	1.48623	0.571661
nrf-6	C08B11.4	C08B11.4	1,00025	0,431531	2.31791	1.21282
sap-49	C08B11.5	C08B11.5.1	2,92037	2,05493	1.42115	0.507062
sap-49	C08B11.5	C08B11.5.2	2,88937	2,03461	1.42011	0.506003
sap-49	C08B11.5	C08B11.5.3	2,92487	2,05674	1.42209	0.508013
sap-49	C08B11.5	C08B11.5.4	1,59931	1,2235	1.30716	0.386436
C08B11.6	C08B11.6	C08B11.6.1	1,59931	1,2235	1.30716	0.386436
C08B11.6	C08B11.6	C08B11.6.2	0,823045	0,480582	1.7126	0.776189
ubh-4	C08B11.7	C08B11.7	1,75229	1,23816	1.41524	0.501044
C08B11.8	C08B11.8	C08B11.8	0,564588	0,320491	1.76163	0.816915
C08B11.9	C08B11.9	C08B11.9	1,5486	1,18539	1.30641	0.385603
ugt-17	C08B6.1	C08B6.1	0,581646	0,194312	2.99336	1.58177
C08B6.10	C08B6.10	C08B6.10	0,316194	1,83307	0.172494	-2.53538		1
C08B6.11	C08B6.11	C08B6.11	0,072958	0,029891	2.4408	1.28735
srxa-18	C08B6.12	C08B6.12	0	0
srxa-19	C08B6.13	C08B6.13	0,000654	0
C08B6.14	C08B6.14	C08B6.14	0,003632	0
C08B6.2	C08B6.2	C08B6.2	0,061961	0,054664	1.1335	0.180779
C08B6.3	C08B6.3	C08B6.3	0,102693	0,075254	1.36462	0.448498
C08B6.4	C08B6.4	C08B6.4a	0,079086	0,024246	3.26182	1.70568	1
C08B6.4	C08B6.4	C08B6.4b	0,11592	0,024796	4.67495	2.22495	1
C08B6.5	C08B6.5	C08B6.5	0,000469	0
C08B6.6	C08B6.6	C08B6.6	0,000258	0
C08B6.7	C08B6.7	C08B6.7	1,54459	0,778176	1.98489	0.989056
C08B6.8	C08B6.8	C08B6.8	0,605974	0,67779	0.894044	-0.161582
aos-1	C08B6.9	C08B6.9	1,22569	1,11854	1.09579	0.131977
egl-5	C08C3.1	C08C3.1a	0,113251	0,225084	0.50315	-0.99094
egl-5	C08C3.1	C08C3.1b	0,079506	0,131033	0.606765	-0.720789
egl-5	C08C3.1	C08C3.1c	0,122942	0,22994	0.53467	-0.90328
bath-15	C08C3.2	C08C3.2	0,357173	0,231501	1.54286	0.625605
mab-5	C08C3.3	C08C3.3	0,131613	0,124665	1.05573	0.0782455
C08C3.4	C08C3.4	C08C3.4a	3,50398	1,40661	2.49108	1.31677
C08C3.4	C08C3.4	C08C3.4b	2,8858	1,24859	2.31125	1.20867
C08D8.1	C08D8.1	C08D8.1	0,00728	0,007845	0.927994	-0.107813
tmd-2	C08D8.2	C08D8.2a	0,210802	0,067421	3.12665	1.64462
tmd-2	C08D8.2	C08D8.2b	0,118644	0,051375	2.30937	1.2075
C08E3.1	C08E3.1	C08E3.1	nan	nan
C08E3.10	C08E3.10	C08E3.10a	0,042313	0,016392	2.58131	1.3681
C08E3.10	C08E3.10	C08E3.10b	0,037463	0,012247	3.05891	1.61302
C08E3.11	C08E3.11	C08E3.11	0,002385	0
C08E3.12	C08E3.12	C08E3.12	0	0
C08E3.13	C08E3.13	C08E3.13	1,48496	10,4526	0.142066	-2.81537		1
C08E3.14	C08E3.14	C08E3.14	0	0
C08E3.15	C08E3.15	C08E3.15	0,013189	0,003059	4.31147	2.10818	1
C08E3.2	C08E3.2	C08E3.2	0	0
bath-33	C08E3.3	C08E3.3	0,00077	0,002864	0.268811	-1.89533		1
C08E3.4	C08E3.4	C08E3.4	0,012716	0,014382	0.884154	-0.177631
C08E3.5	C08E3.5	C08E3.5	0,044642	0,031508	1.41683	0.502667
C08E3.6	C08E3.6	C08E3.6	0,096771	0,196993	0.491242	-1.02549
C08E3.7	C08E3.7	C08E3.7	0,065141	0,056697	1.14893	0.200291
C08E3.8	C08E3.8	C08E3.8	0,08073	0,026434	3.05403	1.61071
C08E3.9	C08E3.9	C08E3.9	0,028124	0,013797	2.03841	1.02745
C08E8.1	C08E8.1	C08E8.1	0,007523	0,003739	2.01194	1.00858
C08E8.2	C08E8.2	C08E8.2	0,001982	0,001308	1.51501	0.599325
C08E8.3	C08E8.3	C08E8.3	0,020127	0,041257	0.487835	-1.03554
C08E8.4	C08E8.4	C08E8.4	0,333007	0,305594	1.0897	0.123936
C08E8.5	C08E8.5	C08E8.5	0	0
C08E8.6	C08E8.6	C08E8.6	0,000264	0
math-2	C08F1.1	C08F1.1	0	0
C08F1.10	C08F1.10	C08F1.10	0,243055	0,326088	0.745366	-0.423979
C08F1.11	C08F1.11	C08F1.11	0,061251	0,025839	2.37047	1.24518
fbxb-13	C08F1.3	C08F1.3	0,018074	0,013963	1.29441	0.372299
math-3	C08F1.4	C08F1.4a	0,228474	0,067821	3.36878	1.75223	1
math-3	C08F1.4	C08F1.4b	0,226462	0,065794	3.44199	1.78324	1
math-4	C08F1.5	C08F1.5a	0,120618	0,056859	2.12135	1.08498
math-4	C08F1.5	C08F1.5b	0,109395	0,053521	2.04396	1.03137
C08F1.6	C08F1.6	C08F1.6	0,128962	0,195236	0.660544	-0.598273
C08F1.8	C08F1.8	C08F1.8	0,039286	0,014652	2.6813	1.42293
C08F11.1	C08F11.1	C08F11.1	0,128451	0,014619	8.78658	3.1353	1
C08F11.10	C08F11.10	C08F11.10	0,024498	0,001718	14.2595	3.83385	1
C08F11.11	C08F11.11	C08F11.11	70,9004	502,208	0.141177	-2.82442		1
C08F11.12	C08F11.12	C08F11.12.1	0,886678	2,17477	0.407711	-1.29438
C08F11.12	C08F11.12	C08F11.12.2	0,902788	2,21779	0.407066	-1.29666
C08F11.13	C08F11.13	C08F11.13.1	0,533712	0,323495	1.64983	0.722318
C08F11.13	C08F11.13	C08F11.13.2	0,519524	0,33012	1.57374	0.6542
C08F11.14	C08F11.14	C08F11.14	0,000647	0,000167	3.87535	1.95433	1
C08F11.17	C08F11.17	C08F11.17	0,00045	0,003885	0.115797	-3.11033		1
C08F11.2	C08F11.2	C08F11.2	0	0
C08F11.3	C08F11.3	C08F11.3	0,101903	0,029113	3.50026	1.80746	1
sru-21	C08F11.4	C08F11.4	0,015326	0,044366	0.345436	-1.53351		1
fbxa-98	C08F11.5	C08F11.5	0,062066	0,036282	1.71064	0.774538
C08F11.7	C08F11.7	C08F11.7	0,017639	0,017932	0.983633	-0.0238085
ugt-22	C08F11.8	C08F11.8	0,399819	0,07694	5.1965	2.37754	1
srz-29	C08F11.9	C08F11.9	0,000477	0,000393	1.21396	0.27972
pfd-1	C08F8.1	C08F8.1	3,43671	6,84979	0.501725	-0.995032
C08F8.2	C08F8.2	C08F8.2a	0,50136	0,234215	2.1406	1.09801
C08F8.2	C08F8.2	C08F8.2b.1	0,544663	0,239815	2.27118	1.18344
C08F8.2	C08F8.2	C08F8.2b.2	0,5447	0,239687	2.27255	1.18431
C08F8.3	C08F8.3	C08F8.3	1,333	0,832176	1.60182	0.679716
C08F8.4	C08F8.4	C08F8.4	0,011879	0,004216	2.81765	1.49449
fbxb-9	C08F8.5	C08F8.5	0,004459	0,009563	0.466326	-1.10059
C08F8.6	C08F8.6	C08F8.6	0,03745	0,003911	9.57553	3.25935	1
rap-3	C08F8.7	C08F8.7	0,062646	0,033106	1.89229	0.920137
nhr-67	C08F8.8	C08F8.8	0,089083	0,107352	0.829821	-0.269129
C08F8.9	C08F8.9	C08F8.9	5,42471	8,63585	0.628162	-0.670792
C08G5.1	C08G5.1	C08G5.1	0,000223	0
C08G5.2	C08G5.2	C08G5.2	0,000648	0,000427	1.51702	0.601241
C08G5.3	C08G5.3	C08G5.3	0,000718	0,000653	1.10015	0.137696
snt-6	C08G5.4	C08G5.4	0,222083	0,105654	2.10198	1.07175
C08G5.5	C08G5.5	C08G5.5	0,245535	0,190596	1.28825	0.365411
C08G5.6	C08G5.6	C08G5.6	0,029201	0,015674	1.86302	0.897644
C08G5.7	C08G5.7	C08G5.7a	0,147263	0,316866	0.464749	-1.10548
C08G5.7	C08G5.7	C08G5.7b	0,038649	0,025731	1.50204	0.58692
C08G9.1	C08G9.1	C08G9.1	1,02738	0,825679	1.24429	0.315317
C08G9.2	C08G9.2	C08G9.2	0,027026	0,004559	5.92812	2.56757	1
C08H9.1	C08H9.1	C08H9.1	0,016605	0,001604	10.3523	3.37188	1
C08H9.10	C08H9.10	C08H9.10	0,00539	0,000268	20.1126	4.33003	1
C08H9.11	C08H9.11	C08H9.11	0,006233	0,00151	4.12791	2.04541	1
C08H9.12	C08H9.12	C08H9.12	0,008595	0,000238	36.1145	5.17451	1
C08H9.13	C08H9.13	C08H9.13	0,005244	0,000451	11.6271	3.53942	1
C08H9.14	C08H9.14	C08H9.14	0,012635	0,001096	11.5284	3.52712	1
C08H9.15	C08H9.15	C08H9.15	0,728123	0,829589	0.877691	-0.188215
C08H9.2	C08H9.2	C08H9.2	10,0119	6,14213	1.63004	0.704905
C08H9.3	C08H9.3	C08H9.3a	0,370643	0,175163	2.11599	1.08133
C08H9.3	C08H9.3	C08H9.3b	0,181942	0,143669	1.2664	0.34073
C08H9.4	C08H9.4	C08H9.4a	0,004119	0,00827	0.498018	-1.00573
C08H9.4	C08H9.4	C08H9.4b	0,021157	0,002636	8.02625	3.00473	1
old-1	C08H9.5	C08H9.5	0,020854	0,000907	22.9924	4.52308	1
C08H9.6	C08H9.6	C08H9.6	0,004588	0,000282	16.2711	4.02424	1
C08H9.7	C08H9.7	C08H9.7	0,052845	0,005927	8.91589	3.15638	1
C08H9.8	C08H9.8	C08H9.8	0,000214	0
ser-7	C09B7.1	C09B7.1a	0,078594	0,017931	4.38316	2.13197	1
ser-7	C09B7.1	C09B7.1b	0,079489	0,016917	4.69878	2.23229	1
ser-7	C09B7.1	C09B7.1c	0,080104	0,015925	5.03008	2.33058	1
C09B7.2	C09B7.2	C09B7.2	0,90145	0,931758	0.967472	-0.0477078
ipp-5	C09B8.1	C09B8.1	0,257233	0,239517	1.07397	0.102948
C09B8.3	C09B8.3	C09B8.3	0,008485	0,001307	6.49193	2.69865	1
C09B8.4	C09B8.4	C09B8.4	0,014723	0,000745	19.763	4.30473	1
C09B8.5	C09B8.5	C09B8.5	0,043227	0,026687	1.61977	0.695789
hsp-25	C09B8.6	C09B8.6a	4,26096	2,7518	1.54843	0.630803
hsp-25	C09B8.6	C09B8.6b	4,4882	2,78359	1.61238	0.68919
hsp-25	C09B8.6	C09B8.6c.1	1,8764	2,12845	0.88158	-0.181836
hsp-25	C09B8.6	C09B8.6c.2	1,90321	2,13638	0.890857	-0.166734
hsp-25	C09B8.6	C09B8.6c.3	1,43877	1,97525	0.728399	-0.457199
hsp-25	C09B8.6	C09B8.6c.4	4,4882	2,78359	1.61238	0.68919
pak-1	C09B8.7	C09B8.7a.1	0,757427	0,596839	1.26906	0.343765
pak-1	C09B8.7	C09B8.7a.2	0,757753	0,595996	1.27141	0.346425
pak-1	C09B8.7	C09B8.7b	0,717532	0,57705	1.24345	0.314347
pak-1	C09B8.7	C09B8.7c.1	0,717532	0,57705	1.24345	0.314347
pak-1	C09B8.7	C09B8.7c.2	0,75703	0,559645	1.3527	0.435839
pak-1	C09B8.7	C09B8.7e.1	0,620893	0,530581	1.17021	0.226772
pak-1	C09B8.7	C09B8.7e.2	0,717747	0,578247	1.24125	0.31179
pak-1	C09B8.7	C09B8.7e.3	0,717532	0,57705	1.24345	0.314347
C09B8.8	C09B8.8	C09B8.8	0,030876	0,047784	0.646149	-0.63006
C09B9.1	C09B9.1	C09B9.1	0,034477	0,014687	2.34742	1.23108
C09B9.2	C09B9.2	C09B9.2	0,010022	0,005919	1.69326	0.759803
C09B9.3	C09B9.3	C09B9.3	0,001073	0,000091	11.791	3.55961	1
C09B9.4	C09B9.4	C09B9.4	0,031728	0,002273	13.9586	3.80308	1
msp-55	C09B9.6	C09B9.6	0,044461	0,01852	2.40071	1.26346
C09B9.7	C09B9.7	C09B9.7	0,001845	0,000094	19.625	4.29462	1
C09B9.8	C09B9.8	C09B9.8	0,108361	0,063911	1.6955	0.761709
zig-4	C09C7.1	C09C7.1	0,247929	0,094771	2.61609	1.38741
unc-89	C09D1.1	C09D1.1a	0,517517	0,155877	3.32003	1.7312	1
unc-89	C09D1.1	C09D1.1b	0,480903	0,148452	3.23945	1.69575	1
unc-89	C09D1.1	C09D1.1c	0,352646	0,12222	2.88534	1.52874
unc-89	C09D1.1	C09D1.1d	0,353635	0,12185	2.90222	1.53715
unc-89	C09D1.1	C09D1.1e	0,553908	0,165275	3.35143	1.74478	1
unc-89	C09D1.1	C09D1.1f	0,52393	0,158421	3.3072	1.72561	1
unc-89	C09D1.1	C09D1.1g	0,507805	0,155243	3.27103	1.70975	1
C09D1.2	C09D1.2	C09D1.2	0,034984	0,000606	57.7285	5.85121	1
C09D4.1	C09D4.1	C09D4.1a	0,340977	0,12568	2.71306	1.43992
C09D4.1	C09D4.1	C09D4.1b.1	0,361129	0,120657	2.99302	1.5816
C09D4.1	C09D4.1	C09D4.1b.2	0,361259	0,120681	2.9935	1.58183
C09D4.2	C09D4.2	C09D4.2	1,50202	1,81916	0.825667	-0.276368
C09D4.3	C09D4.3	C09D4.3	0,046743	0,004543	10.2889	3.36302	1
C09D4.4	C09D4.4	C09D4.4a	0,87388	0,414216	2.10972	1.07705
C09D4.4	C09D4.4	C09D4.4b	0,873198	0,407962	2.14039	1.09787
C09D4.4	C09D4.4	C09D4.4c	0,818778	0,410042	1.99681	0.997701
rpl-19	C09D4.5	C09D4.5.1	101,983	120,031	0.849639	-0.235078
rpl-19	C09D4.5	C09D4.5.2	102,165	118,349	0.863252	-0.212146
rpl-19	C09D4.5	C09D4.5.3	101,205	152,245	0.664751	-0.589114
rpl-19	C09D4.5	C09D4.5.4	101,397	118,126	0.85838	-0.220312
C09D4.6	C09D4.6	C09D4.6	0,003076	0,001057	2.90993	1.54099
ptp-3	C09D8.1	C09D8.1a	0,800537	0,424786	1.88457	0.914232
ptp-3	C09D8.1	C09D8.1b	1,09981	0,557537	1.97262	0.980115
ptp-3	C09D8.1	C09D8.1c	1,16398	0,546242	2.13089	1.09145
dgk-1	C09E10.2	C09E10.2a	0,233303	0,088354	2.64055	1.40084
dgk-1	C09E10.2	C09E10.2b	0,23296	0,088787	2.62381	1.39166
dgk-1	C09E10.2	C09E10.2c	0,211249	0,087708	2.40855	1.26816
dgk-1	C09E10.2	C09E10.2d	0,210891	0,088244	2.38986	1.25693
dgk-1	C09E10.2	C09E10.2e	0,233836	0,085606	2.73154	1.44971
srxa-5	C09E7.1	C09E7.1	0	0,000417	0
C09E7.10	C09E7.10	C09E7.10	0,031828	0,001657	19.208	4.26364	1
pqn-10	C09E7.2	C09E7.2	0,003673	0,002214	1.6592	0.730488
oig-1	C09E7.3	C09E7.3	0,132178	0,067471	1.95903	0.970143
C09E7.4	C09E7.4	C09E7.4	0,133232	0,093002	1.43257	0.518607
[truncated: 25,323 more rows]
