# Supplementary material for: A Comprehensive Analysis of Gene Expression Changes Provoked by Bacterial and Fungal Infection in C. elegans
Source: PLoS One. 2011 May 13;6(5):e19055. doi: 10.1371/journal.pone.0019055 (PMC3094335; doi:10.1371/journal.pone.0019055)
Supplement: Table S5 — Expression of transcripts after infection with P. luminescens for 24 hours using tiling arrays. Public gene, sequence and transcript names come from WS170. The values in the columns PL and OP50 are the log2 transformed ratios of the perfect-match to mismatch probe intensities, mapped on to individual transcripts (see Methods) for samples from worms infected for 24 h with P. luminescens strain Hb, or age-matched uninfected control worms. Transcripts identified as up- or down-regulated by infection (see Methods) are indicated. (XLS) [file pone.0019055.s009.xls]

## Sheet: Tiling_array_P.luminescens
GenePublicName	SequenceNameGene	SequenceNameTranscript	PL	OP50	Ratio_PLvsOP50	log2_Ratio_PLvsOP50	Infection_upregulated	Infection_downregulated
2L52.1	2L52.1	2L52.1	5.93	4.99	1.92	0.94
2RSSE.1	2RSSE.1	2RSSE.1	8.91	7.68	2.35	1.23
2RSSE.2	2RSSE.2	2RSSE.2	8.19	6.37	3.53	1.82	1
3R5.1	3R5.1	3R5.1	6.36	5.93	1.34	0.43
nas-6	4R79.1	4R79.1a	3.11	2.47	1.55	0.64
nas-6	4R79.1	4R79.1b	3.65	2.62	2.05	1.03
4R79.2	4R79.2	4R79.2	3.25	2.42	1.77	0.82
6R55.1	6R55.1	6R55.1a	8.49	7.63	1.82	0.86
6R55.1	6R55.1	6R55.1b	8.45	7.55	1.87	0.91
6R55.2	6R55.2	6R55.2	3.23	1.9	2.52	1.33
sri-20	AC3.1	AC3.1	3.56	1.8	3.37	1.75
spe-10	AC3.10	AC3.10	3.23	1.99	2.37	1.25
ugt-49	AC3.2	AC3.2	7.36	6.01	2.54	1.35
abu-1	AC3.3	AC3.3	5.49	1.87	12.32	3.62	1
pqn-2	AC3.4	AC3.4	3.77	2.11	3.15	1.66
AC3.5	AC3.5	AC3.5.1	7.26	5.62	3.11	1.64
AC3.5	AC3.5	AC3.5.2	7.23	5.62	3.05	1.61
col-151	AC3.6	AC3.6	3.56	2.07	2.8	1.49
ugt-1	AC3.7	AC3.7	3.72	3.86	0.9	-0.15
ugt-2	AC3.8	AC3.8	5.1	3.82	2.43	1.28
tag-49	AC7.1	AC7.1a	3.67	2.26	2.67	1.42
tag-49	AC7.1	AC7.1b	3.71	2.25	2.75	1.46
soc-2	AC7.2	AC7.2a.1	8.13	6.48	3.12	1.64
soc-2	AC7.2	AC7.2a.2	8.13	6.5	3.11	1.64
soc-2	AC7.2	AC7.2b	7.21	6.01	2.3	1.2
AC7.3	AC7.3	AC7.3	3.58	2.35	2.34	1.22
AC8.10	AC8.10	AC8.10	6.4	4.85	2.94	1.56
AC8.11	AC8.11	AC8.11	6.74	5.43	2.47	1.31
AC8.12	AC8.12	AC8.12	6.28	4.93	2.55	1.35
AC8.3	AC8.3	AC8.3	6.34	4.43	3.77	1.91	1
AC8.4	AC8.4	AC8.4	7.12	5.54	2.98	1.58
AC8.7	AC8.7	AC8.7	6.42	5.29	2.19	1.13
AH10.1	AH10.1	AH10.1	3.35	1.78	2.97	1.57
AH10.2	AH10.2	AH10.2	1.86	2.91	0.48	-1.05		1
AH10.3	AH10.3	AH10.3	4.35	2.53	3.53	1.82	1
AH10.4	AH10.4	AH10.4	2.2	2.58	0.77	-0.38
gcy-1	AH6.1	AH6.1	2.95	1.91	2.07	1.05
sra-6	AH6.10	AH6.10	3.44	2.34	2.14	1.1
sra-7	AH6.11	AH6.11	2.68	2	1.61	0.69
sra-8	AH6.12	AH6.12	2.46	2.21	1.19	0.25
sra-9	AH6.14	AH6.14	1.39	1.42	0.98	-0.03
AH6.2	AH6.2	AH6.2	3.52	2.4	2.17	1.12
AH6.3	AH6.3	AH6.3	3.97	1.3	6.37	2.67	1
sra-1	AH6.4	AH6.4	2.69	2.21	1.39	0.48
mex-6	AH6.5	AH6.5	10.52	10.27	1.19	0.25
sra-2	AH6.6	AH6.6	2.78	1.8	1.98	0.99
sra-3	AH6.7	AH6.7	1.8	1.54	1.2	0.26
sra-4	AH6.8	AH6.8	2.49	1.42	2.1	1.07
AH9.1	AH9.1	AH9.1	4.59	3.05	2.91	1.54
crn-4	AH9.2	AH9.2	6.51	5.48	2.04	1.03
AH9.3	AH9.3	AH9.3	6.21	5.9	1.24	0.31
AH9.4	AH9.4	AH9.4	3.22	2.01	2.33	1.22
AH9.6	AH9.6	AH9.6	5.37	2.62	6.74	2.75	1
B0001.1	B0001.1	B0001.1	9.59	8.32	2.42	1.27
B0001.2	B0001.2	B0001.2	7.59	6.83	1.69	0.76
B0001.3	B0001.3	B0001.3	7.23	6.5	1.65	0.72
B0001.4	B0001.4	B0001.4	8.12	7.07	2.07	1.05
B0001.5	B0001.5	B0001.5	6.44	5.89	1.46	0.55
B0001.6	B0001.6	B0001.6.1	8.23	7.38	1.81	0.86
B0001.6	B0001.6	B0001.6.2	8.47	7.77	1.63	0.71
B0001.6	B0001.6	B0001.6.3	8.66	7.96	1.63	0.7
B0001.7	B0001.7	B0001.7	7.08	6.95	1.09	0.12
B0001.8	B0001.8	B0001.8.1	7.3	6.38	1.9	0.93
B0001.8	B0001.8	B0001.8.2	7.44	6.66	1.72	0.79
B0001.8	B0001.8	B0001.8.3	7.44	6.66	1.72	0.79
amx-2	B0019.1	B0019.1	5.71	4.18	2.89	1.53
B0019.2	B0019.2	B0019.2	6.5	5.74	1.69	0.75
col-149	B0024.1	B0024.1	7.96	4.14	14.18	3.83	1
B0024.10	B0024.10	B0024.10.1	8.74	7.97	1.71	0.77
B0024.10	B0024.10	B0024.10.2	8.81	8.16	1.57	0.65
B0024.11	B0024.11	B0024.11	8.27	7.53	1.67	0.74
gna-1	B0024.12	B0024.12	6.94	5.33	3.07	1.62
B0024.13	B0024.13	B0024.13a	8.96	8.37	1.5	0.59
B0024.13	B0024.13	B0024.13b	7.88	7.14	1.67	0.74
crm-1	B0024.14	B0024.14a	8.42	6.56	3.62	1.86	1
crm-1	B0024.14	B0024.14b	8.71	6.71	4	2	1
crm-1	B0024.14	B0024.14c.1	8.45	6.56	3.73	1.9	1
crm-1	B0024.14	B0024.14c.2	8.22	6.31	3.76	1.91	1
crm-1	B0024.14	B0024.14d	8.45	6.58	3.67	1.88	1
crm-1	B0024.14	B0024.14e	8.34	6.48	3.64	1.86	1
B0024.15	B0024.15	B0024.15	3.22	1.63	3	1.58
col-150	B0024.2	B0024.2	5.72	2.62	8.61	3.11	1
B0024.3	B0024.3	B0024.3	5.49	3.21	4.84	2.28	1
B0024.4	B0024.4	B0024.4	9.81	5.13	25.64	4.68	1
gcy-6	B0024.6	B0024.6	2.85	1.85	2	1
B0024.8	B0024.8	B0024.8	3.68	2.48	2.3	1.2
trx-2	B0024.9	B0024.9.1	8.64	8.31	1.26	0.33
trx-2	B0024.9	B0024.9.2	9.01	8.54	1.39	0.47
vps-34	B0025.1	B0025.1a	8.29	7.18	2.16	1.11
vps-34	B0025.1	B0025.1b.1	8.21	7.18	2.03	1.02
vps-34	B0025.1	B0025.1b.2	8.29	7.18	2.16	1.11
vps-34	B0025.1	B0025.1c.1	8.29	7.18	2.16	1.11
vps-34	B0025.1	B0025.1c.2	8.41	7.38	2.04	1.03
vps-34	B0025.1	B0025.1d.1	8.23	7.17	2.08	1.06
vps-34	B0025.1	B0025.1d.2	8.28	7.27	2.01	1.01
vps-34	B0025.1	B0025.1e	8.23	7.17	2.08	1.06
csn-2	B0025.2	B0025.2.1	8.72	8.08	1.56	0.64
csn-2	B0025.2	B0025.2.2	8.88	8.43	1.37	0.45
csn-2	B0025.2	B0025.2.3	8.88	8.43	1.37	0.45
csn-2	B0025.2	B0025.2.4	8.88	8.43	1.37	0.45
B0025.4	B0025.4	B0025.4	4.13	3.5	1.55	0.63
B0034.1	B0034.1	B0034.1	5.31	3.33	3.95	1.98	1
B0034.2	B0034.2	B0034.2	4.4	1.65	6.72	2.75	1
casy-1	B0034.3	B0034.3a	8.74	6.43	4.95	2.31	1
casy-1	B0034.3	B0034.3b	7.82	4.65	9.01	3.17	1
casy-1	B0034.3	B0034.3c.1	8.71	6.4	4.97	2.31	1
casy-1	B0034.3	B0034.3c.2	7.73	4.69	8.22	3.04	1
B0034.4	B0034.4	B0034.4	3.04	2.07	1.96	0.97
B0034.5	B0034.5	B0034.5	2.62	1.74	1.84	0.88
B0034.7	B0034.7	B0034.7	5.49	1.63	14.45	3.85	1
his-45	B0035.10	B0035.10	13.29	13.18	1.08	0.11
B0035.11	B0035.11	B0035.11	8	7.18	1.77	0.82
B0035.12	B0035.12	B0035.12.1	8.26	7.25	2.02	1.02
B0035.12	B0035.12	B0035.12.2	8.66	7.64	2.02	1.01
B0035.13	B0035.13	B0035.13	6.89	6.05	1.79	0.84
dnj-1	B0035.14	B0035.14.1	8.28	7.38	1.87	0.9
dnj-1	B0035.14	B0035.14.2	8.59	7.74	1.8	0.85
B0035.15	B0035.15	B0035.15	7.14	6.34	1.74	0.8
B0035.16	B0035.16	B0035.16	5.14	3.66	2.79	1.48
B0035.18	B0035.18	B0035.18	7.79	8.11	0.8	-0.32
B0035.1	B0035.1	B0035.1a	8.57	7.99	1.49	0.58
B0035.1	B0035.1	B0035.1b	8.64	8	1.56	0.64
dnj-2	B0035.2	B0035.2	7.76	6.97	1.72	0.79
B0035.3	B0035.3	B0035.3	7.77	7.46	1.24	0.31
pfd-4	B0035.4	B0035.4.1	8.87	8.01	1.82	0.86
pfd-4	B0035.4	B0035.4.2	7.55	6.63	1.9	0.93
pfd-4	B0035.4	B0035.4.3	8.87	8.01	1.82	0.86
B0035.5	B0035.5	B0035.5.1	8.7	7.64	2.08	1.06
B0035.5	B0035.5	B0035.5.2	8.78	7.78	2	1
B0035.6	B0035.6	B0035.6	7.94	7.84	1.08	0.11
his-47	B0035.7	B0035.7	12.44	11.82	1.54	0.62
his-48	B0035.8	B0035.8	13.22	13.24	0.99	-0.02
his-46	B0035.9	B0035.9	13.61	13.21	1.32	0.4
B0041.1	B0041.1	B0041.1	3.29	2.14	2.21	1.15
B0041.2	B0041.2	B0041.2a.1	9.64	8.52	2.17	1.12
B0041.2	B0041.2	B0041.2a.2	9.64	8.52	2.17	1.12
B0041.2	B0041.2	B0041.2b	9.58	8.49	2.13	1.09
B0041.2	B0041.2	B0041.2c	9.66	8.57	2.14	1.1
B0041.3	B0041.3	B0041.3	7.61	6.41	2.31	1.21
rpl-4	B0041.4	B0041.4.1	11.27	10.73	1.45	0.54
rpl-4	B0041.4	B0041.4.2	12.54	11.88	1.57	0.65
rpl-4	B0041.4	B0041.4.3	12.82	12.16	1.57	0.65
B0041.5	B0041.5	B0041.5	6.03	5.2	1.79	0.84
ptps-1	B0041.6	B0041.6a	7.19	5.78	2.67	1.41
ptps-1	B0041.6	B0041.6b	7.19	5.78	2.67	1.41
xnp-1	B0041.7	B0041.7	7.98	6.94	2.06	1.04
B0041.8	B0041.8	B0041.8.1	9	9.26	0.84	-0.26
B0041.8	B0041.8	B0041.8.2	9.75	9.92	0.89	-0.17
bath-20	B0047.1	B0047.1a	4.72	3.06	3.18	1.67
bath-20	B0047.1	B0047.1b	4.67	3.24	2.7	1.43
B0047.2	B0047.2	B0047.2	3.48	2.92	1.47	0.55
bath-24	B0047.3	B0047.3	3.99	3.48	1.43	0.52
math-1	B0047.4	B0047.4	3.47	2.84	1.54	0.62
tsp-20	B0198.1	B0198.1	4.28	3.36	1.9	0.92
B0198.2	B0198.2	B0198.2	4.8	3.41	2.63	1.39
B0198.3	B0198.3	B0198.3	5.33	3.42	3.76	1.91	1
B0205.10	B0205.10	B0205.10.1	2.71	2.72	0.99	-0.01
B0205.10	B0205.10	B0205.10.2	2.54	2.74	0.87	-0.19
B0205.11	B0205.11	B0205.11	8.75	7.19	2.94	1.55
B0205.12	B0205.12	B0205.12	6.63	6.26	1.3	0.38
B0205.13	B0205.13	B0205.13	4.65	2.6	4.14	2.05	1
B0205.14	B0205.14	B0205.14	3.21	1.43	3.44	1.78	1
B0205.1	B0205.1	B0205.1a	6.52	5.77	1.68	0.74
B0205.1	B0205.1	B0205.1b	5.95	5.31	1.55	0.64
srz-85	B0205.2	B0205.2a	2.19	2.51	0.8	-0.32
srz-85	B0205.2	B0205.2b	2.61	2.31	1.23	0.3
rpn-10	B0205.3	B0205.3.1	9.9	8.68	2.32	1.21
rpn-10	B0205.3	B0205.3.2	10.32	9.12	2.29	1.19
B0205.4	B0205.4	B0205.4	4.13	2.01	4.36	2.12	1
B0205.5	B0205.5	B0205.5	3.79	4.33	0.69	-0.54
B0205.6	B0205.6	B0205.6	7.05	5.65	2.63	1.4
kin-3	B0205.7	B0205.7.1	9.72	8.78	1.92	0.94
kin-3	B0205.7	B0205.7.2	9.63	8.77	1.81	0.86
B0205.8	B0205.8	B0205.8	6.28	4.94	2.54	1.34
B0205.9	B0205.9	B0205.9	8.04	7.62	1.33	0.41
B0207.1	B0207.1	B0207.1	2.27	2.11	1.12	0.16
B0207.10	B0207.10	B0207.10	4.47	3.34	2.19	1.13
B0207.11	B0207.11	B0207.11	4.62	1.75	7.29	2.87	1
41730	B0207.12	B0207.12a	5.07	3.06	4.03	2.01	1
41730	B0207.12	B0207.12b	4.81	3.04	3.41	1.77	1
41730	B0207.12	B0207.12c	5.14	3.09	4.15	2.05	1
B0207.2	B0207.2	B0207.2	2.79	2.67	1.09	0.12
gpa-14	B0207.3	B0207.3a	4.72	2.17	5.84	2.55	1
gpa-14	B0207.3	B0207.3b	4.75	2.13	6.12	2.61	1
air-2	B0207.4	B0207.4	7.59	7.8	0.86	-0.21
B0207.5	B0207.5	B0207.5	2.36	1.85	1.43	0.51
B0207.6	B0207.6	B0207.6	7.9	7.32	1.5	0.58
B0207.7	B0207.7	B0207.7	2.53	2.39	1.1	0.13
B0207.8	B0207.8	B0207.8	4.23	1.93	4.91	2.3	1
B0207.9	B0207.9	B0207.9	2.85	1.79	2.09	1.06
B0212.1	B0212.1	B0212.1	2.34	2.54	0.87	-0.2
sre-5	B0212.2	B0212.2	4.18	3.19	1.99	0.99
B0212.3	B0212.3	B0212.3	5.45	5.41	1.03	0.04
B0212.4	B0212.4	B0212.4a	3.5	3.96	0.72	-0.47
B0212.4	B0212.4	B0212.4b	3.97	3.78	1.14	0.18
B0212.4	B0212.4	B0212.4c	3.48	3.86	0.77	-0.38
osm-9	B0212.5	B0212.5	4.66	3.13	2.89	1.53
B0212.6	B0212.6	B0212.6	2.58	2.57	1.01	0.01
cyp-34A5	B0213.10	B0213.10	3.53	3.17	1.28	0.36
cyp-34A6	B0213.11	B0213.11	2.69	2.24	1.36	0.45
cyp-34A7	B0213.12	B0213.12	3.05	2.07	1.98	0.98
cyp-34A8	B0213.14	B0213.14	6	5.34	1.58	0.66
cyp-34A9	B0213.15	B0213.15a	4.33	6.12	0.29	-1.78		1
cyp-34A9	B0213.15	B0213.15b	4.35	6.29	0.26	-1.94		1
cyp-34A9	B0213.15	B0213.15c	4.89	6.38	0.36	-1.49		1
cyp-34A10	B0213.16	B0213.16	2.79	2.9	0.93	-0.11
nlp-34	B0213.17	B0213.17.1	7.08	3.99	8.51	3.09	1
nlp-34	B0213.17	B0213.17.2	5.01	4.15	1.81	0.86
nlp-27	B0213.2	B0213.2	8.9	9.12	0.85	-0.23
nlp-28	B0213.3	B0213.3	8.03	7.78	1.19	0.25
nlp-29	B0213.4	B0213.4	8.78	8.74	1.02	0.04
nlp-30	B0213.5	B0213.5	6.62	4.46	4.47	2.16	1
nlp-31	B0213.6	B0213.6	6.9	4.87	4.1	2.04	1
str-83	B0213.7	B0213.7	2.84	2.38	1.37	0.46
str-82	B0213.8	B0213.8	3.17	2.54	1.55	0.63
str-247	B0213.9	B0213.9	3.45	1.99	2.75	1.46
B0218.1	B0218.1	B0218.1a.1	5.75	5.5	1.19	0.26
B0218.1	B0218.1	B0218.1a.2	8.12	6.27	3.61	1.85	1
B0218.1	B0218.1	B0218.1a.3	8.1	6.26	3.59	1.84	1
B0218.1	B0218.1	B0218.1a.4	8.1	6.26	3.59	1.84	1
B0218.1	B0218.1	B0218.1a.5	8.1	6.26	3.59	1.84	1
B0218.1	B0218.1	B0218.1b.1	8.12	6.34	3.43	1.78	1
B0218.1	B0218.1	B0218.1b.2	8.1	6.33	3.41	1.77	1
B0218.1	B0218.1	B0218.1b.3	8.1	6.33	3.41	1.77	1
B0218.2	B0218.2	B0218.2.1	9.58	6.75	7.07	2.82	1
B0218.2	B0218.2	B0218.2.2	9.85	7.05	6.95	2.8	1
pmk-1	B0218.3	B0218.3	7.63	6.18	2.73	1.45
B0218.5	B0218.5	B0218.5	3.28	2.77	1.43	0.51
clec-51	B0218.6	B0218.6	3.26	4.37	0.46	-1.11		1
B0218.7	B0218.7	B0218.7	2.65	1.9	1.68	0.75
clec-52	B0218.8	B0218.8	8.63	6.39	4.73	2.24	1
B0222.1	B0222.1	B0222.1	5.55	2.89	6.3	2.66	1
B0222.10	B0222.10	B0222.10	2.74	1.85	1.85	0.89
B0222.11	B0222.11	B0222.11	3.53	2.24	2.45	1.29
B0222.2	B0222.2	B0222.2	2.98	1.86	2.18	1.12
B0222.3	B0222.3	B0222.3	6.96	5.35	3.05	1.61
tag-38	B0222.4	B0222.4	4.82	3.08	3.32	1.73
B0222.5	B0222.5	B0222.5	5.53	4.11	2.66	1.41
col-144	B0222.6	B0222.6	11.01	9.07	3.85	1.94	1
col-145	B0222.7	B0222.7	7.13	5.79	2.54	1.34
col-10	B0222.8	B0222.8	11.13	8.65	5.6	2.48	1
B0222.9	B0222.9	B0222.9	5.01	5.02	0.99	-0.01
B0228.1	B0228.1	B0228.1	5.24	4.08	2.23	1.15
tag-308	B0228.4	B0228.4a	7.32	5.58	3.35	1.74
tag-308	B0228.4	B0228.4b	7.01	5.4	3.06	1.61
tag-308	B0228.4	B0228.4c	7.22	5.41	3.51	1.81	1
tag-308	B0228.4	B0228.4d	6.79	5.32	2.77	1.47
tag-308	B0228.4	B0228.4e	7.51	5.4	4.31	2.11	1
trx-1	B0228.5	B0228.5a	3.46	3.26	1.15	0.2
trx-1	B0228.5	B0228.5b	3.14	2.71	1.34	0.42
B0228.6	B0228.6	B0228.6	6.88	5.13	3.36	1.75
B0228.7	B0228.7	B0228.7.1	7.86	7.52	1.27	0.35
B0228.7	B0228.7	B0228.7.2	7.97	7.61	1.29	0.36
B0228.8	B0228.8	B0228.8	2.13	1.92	1.16	0.21
B0228.9	B0228.9	B0228.9	2.58	1.6	1.96	0.97
B0238.1	B0238.1	B0238.1	6.06	4.57	2.8	1.49
B0238.10	B0238.10	B0238.10	9.4	8.91	1.4	0.49
B0238.11	B0238.11	B0238.11.1	9.47	9.53	0.96	-0.06
B0238.11	B0238.11	B0238.11.2	10.51	10.38	1.09	0.13
B0238.12	B0238.12	B0238.12	4.92	3.54	2.6	1.38
B0238.13	B0238.13	B0238.13	3.87	2.41	2.77	1.47
B0238.15	B0238.15	B0238.15	4.91	4.94	0.98	-0.03
srt-68	B0238.3	B0238.3	1.74	2.45	0.61	-0.71
srt-67	B0238.5	B0238.5	1.96	1.57	1.31	0.39
srt-70	B0238.6	B0238.6	2	1.82	1.13	0.18
B0238.7	B0238.7	B0238.7	3.61	1.7	3.75	1.91	1
srt-69	B0238.8	B0238.8	1.41	1.76	0.78	-0.35
B0238.9	B0238.9	B0238.9	8.04	7.29	1.69	0.76
rhr-2	B0240.1	B0240.1.1	3.43	2.84	1.51	0.59
rhr-2	B0240.1	B0240.1.2	3.37	2.85	1.43	0.52
spe-42	B0240.2	B0240.2	2.11	1.68	1.35	0.43
daf-11	B0240.3	B0240.3	3.13	2.32	1.75	0.81
npp-22	B0240.4	B0240.4.1	8.29	7.63	1.57	0.66
npp-22	B0240.4	B0240.4.2	8.38	7.7	1.6	0.68
B0244.10	B0244.10	B0244.10	3.75	2.87	1.85	0.88
B0244.11	B0244.11	B0244.11	4.64	1.23	10.63	3.41	1
ida-1	B0244.2	B0244.2.1	8.73	7.02	3.26	1.7
ida-1	B0244.2	B0244.2.2	8.73	7.02	3.26	1.7
B0244.4	B0244.4	B0244.4	2.73	1.76	1.96	0.97
B0244.5	B0244.5	B0244.5	3.34	2.76	1.49	0.58
B0244.6	B0244.6	B0244.6	4.04	2.46	2.99	1.58
B0244.7	B0244.7	B0244.7	3.17	1.81	2.56	1.36
egg-1	B0244.8	B0244.8	7.64	7.44	1.15	0.2
B0244.9	B0244.9	B0244.9	5.83	5.6	1.18	0.24
rpl-2	B0250.1	B0250.1.1	13.39	13.03	1.28	0.36
rpl-2	B0250.1	B0250.1.2	13.67	13.32	1.27	0.35
srbc-78	B0250.10	B0250.10	2.57	2.27	1.23	0.3
B0250.2	B0250.2	B0250.2	4.69	3.2	2.82	1.49
B0250.4	B0250.4	B0250.4	4.93	3.33	3.04	1.61
B0250.5	B0250.5	B0250.5	9.25	8.53	1.66	0.73
srbc-79	B0250.6	B0250.6	2.04	1.05	1.99	1
B0250.8	B0250.8	B0250.8	4.28	4	1.22	0.28
B0250.9	B0250.9	B0250.9	6.41	5.07	2.54	1.35
B0252.1	B0252.1	B0252.1	4.73	4.33	1.32	0.4
asm-1	B0252.2	B0252.2	6.3	4.06	4.73	2.24	1
B0252.3	B0252.3	B0252.3a	4.87	4.54	1.26	0.34
B0252.3	B0252.3	B0252.3b	5.19	4.68	1.42	0.51
B0252.3	B0252.3	B0252.3c.1	4.87	4.54	1.26	0.34
B0252.3	B0252.3	B0252.3c.2	4.87	4.54	1.26	0.34
cyn-10	B0252.4	B0252.4a	7.74	7.98	0.84	-0.25
cyn-10	B0252.4	B0252.4b	6.82	6.15	1.6	0.68
B0252.5	B0252.5	B0252.5	3.52	3.17	1.28	0.36
B0252.8	B0252.8	B0252.8	5.21	2.91	4.95	2.31	1
B0261.1	B0261.1	B0261.1.1	8.29	7.16	2.19	1.13
B0261.1	B0261.1	B0261.1.2	8.58	7.48	2.14	1.1
let-363	B0261.2	B0261.2a	8.83	7.92	1.88	0.91
let-363	B0261.2	B0261.2b	8.81	7.88	1.9	0.93
B0261.4	B0261.4	B0261.4a	9.07	8.1	1.97	0.98
B0261.4	B0261.4	B0261.4b	9.2	8.34	1.81	0.86
B0261.5	B0261.5	B0261.5	1.93	2.83	0.54	-0.9		1
B0261.6	B0261.6	B0261.6a	3.92	2.6	2.5	1.32
B0261.6	B0261.6	B0261.6b	3.92	2.6	2.5	1.32
B0261.7	B0261.7	B0261.7	8.91	8.36	1.46	0.54
B0261.8	B0261.8	B0261.8	5.46	5.73	0.83	-0.28
tbb-4	B0272.1	B0272.1	6.39	3.87	5.75	2.52	1
B0272.2	B0272.2	B0272.2	6.11	5.34	1.7	0.77
B0272.3	B0272.3	B0272.3	9.92	9.06	1.82	0.86
B0272.4	B0272.4	B0272.4	7.45	5.84	3.06	1.61
B0273.1	B0273.1	B0273.1	4.02	2.32	3.24	1.7
puf-7	B0273.2	B0273.2.1	10.83	10.53	1.23	0.29
puf-7	B0273.2	B0273.2.2	11.02	10.81	1.16	0.21
B0273.3	B0273.3	B0273.3	7.13	6.62	1.42	0.5
unc-5	B0273.4	B0273.4a	6.9	5.42	2.78	1.47
unc-5	B0273.4	B0273.4b	6.67	5.49	2.27	1.18
B0280.10	B0280.10	B0280.10	5.46	5.41	1.04	0.06
B0280.11	B0280.11	B0280.11	2.67	1.38	2.44	1.29
glr-2	B0280.12	B0280.12a	4.61	2.58	4.09	2.03	1
glr-2	B0280.12	B0280.12b	4.67	2.63	4.1	2.04	1
B0280.13	B0280.13	B0280.13	6.03	4.46	2.98	1.57
B0280.17	B0280.17	B0280.17	4.7	3.41	2.45	1.29
B0280.1	B0280.1	B0280.1a	8.47	7.88	1.51	0.6
B0280.1	B0280.1	B0280.1b	7.07	6.48	1.5	0.58
B0280.2	B0280.2	B0280.2	5.17	3.89	2.43	1.28
B0280.3	B0280.3	B0280.3.1	9.06	7.94	2.17	1.12
B0280.3	B0280.3	B0280.3.2	9.16	8.13	2.04	1.03
B0280.3	B0280.3	B0280.3.3	9.15	8.07	2.12	1.08
odd-1	B0280.4	B0280.4	4.48	3.06	2.68	1.42
cpg-2	B0280.5	B0280.5.1	12.01	11.65	1.28	0.36
cpg-2	B0280.5	B0280.5.2	12.01	11.65	1.28	0.36
B0280.7	B0280.7	B0280.7	4.22	2.51	3.28	1.71
nhr-10	B0280.8	B0280.8	6.1	4.72	2.59	1.38
B0280.9	B0280.9	B0280.9	8.51	7.8	1.63	0.71
B0281.1	B0281.1	B0281.1	3.46	2.41	2.07	1.05
B0281.3	B0281.3	B0281.3	6.02	5.49	1.45	0.53
B0281.4	B0281.4	B0281.4	2.15	3.43	0.41	-1.28		1
B0281.5	B0281.5	B0281.5	4.97	5.76	0.58	-0.8
B0281.6	B0281.6	B0281.6	1.92	1.41	1.42	0.5
B0281.8	B0281.8	B0281.8	3.02	2.23	1.72	0.78
B0284.1	B0284.1	B0284.1	4.59	3.63	1.94	0.96
B0284.2	B0284.2	B0284.2	3.15	3.07	1.06	0.08
B0284.3	B0284.3	B0284.3	4.34	4.21	1.09	0.13
B0284.4	B0284.4	B0284.4	2.89	1.48	2.65	1.41
B0285.1	B0285.1	B0285.1	8.73	8	1.66	0.73
ckb-3	B0285.10	B0285.10	2.27	1.53	1.67	0.74
B0285.3	B0285.3	B0285.3	7.38	6.27	2.16	1.11
B0285.4	B0285.4	B0285.4	8.25	7.88	1.29	0.37
hse-5	B0285.5	B0285.5	7.35	6.73	1.54	0.62
B0285.6	B0285.6	B0285.6	3.37	1.28	4.25	2.09	1
B0285.7	B0285.7	B0285.7	7.3	5.46	3.59	1.84	1
ckb-1	B0285.8	B0285.8	5.13	3.95	2.27	1.19
ckb-2	B0285.9	B0285.9	6.39	4.31	4.22	2.08	1
B0286.1	B0286.1	B0286.1	6.65	4.94	3.27	1.71
lat-2	B0286.2	B0286.2a	3.56	2.35	2.31	1.21
lat-2	B0286.2	B0286.2b	4.47	2.84	3.09	1.63
B0286.3	B0286.3	B0286.3	7.31	6.52	1.74	0.8
ntl-2	B0286.4	B0286.4a.1	8.2	7.03	2.24	1.17
ntl-2	B0286.4	B0286.4a.2	8.45	7.32	2.18	1.12
ntl-2	B0286.4	B0286.4b	8.07	7.06	2.02	1.02
ntl-2	B0286.4	B0286.4c.1	8.84	7.91	1.9	0.92
ntl-2	B0286.4	B0286.4c.2	8.25	6.99	2.39	1.26
ntl-2	B0286.4	B0286.4c.3	8.45	7.32	2.18	1.12
ntl-2	B0286.4	B0286.4c.4	8.53	7.33	2.3	1.2
ntl-2	B0286.4	B0286.4c.5	8.46	7.34	2.17	1.12
ntl-2	B0286.4	B0286.4d.1	8.62	7.56	2.08	1.06
ntl-2	B0286.4	B0286.4d.2	8.16	6.99	2.25	1.17
ntl-2	B0286.4	B0286.4d.3	8.75	7.81	1.91	0.94
ntl-2	B0286.4	B0286.4d.4	8	6.97	2.05	1.04
ntl-2	B0286.4	B0286.4d.5	8.45	7.32	2.18	1.12
fkh-6	B0286.5	B0286.5	4.65	4.3	1.28	0.36
B0286.6	B0286.6	B0286.6	3.11	3.29	0.88	-0.18
B0294.1	B0294.1	B0294.1	4.89	2.73	4.44	2.15	1
B0294.3	B0294.3	B0294.3	5.07	2.93	4.41	2.14	1
kin-25	B0302.1	B0302.1a	8.17	7.07	2.14	1.1
kin-25	B0302.1	B0302.1b	8.41	7.34	2.11	1.08
kin-25	B0302.1	B0302.1c	8.71	7.54	2.25	1.17
B0302.2	B0302.2	B0302.2	1.44	2.51	0.48	-1.07		1
B0302.4	B0302.4	B0302.4	1.16	1.06	1.07	0.09
B0302.5	B0302.5	B0302.5	8.32	7.18	2.2	1.14
B0303.11	B0303.11	B0303.11	6.11	4.8	2.49	1.32
B0303.14	B0303.14	B0303.14	5.95	4.07	3.67	1.88	1
B0303.15	B0303.15	B0303.15	8.93	8.77	1.12	0.16
B0303.16	B0303.16	B0303.16	3.87	1.84	4.08	2.03	1
B0303.2	B0303.2	B0303.2	5.51	4.12	2.62	1.39
B0303.3	B0303.3	B0303.3.1	9.88	8.81	2.1	1.07
B0303.3	B0303.3	B0303.3.2	9.01	7.25	3.4	1.76
B0303.3	B0303.3	B0303.3.3	10.05	8.96	2.14	1.1
B0303.4	B0303.4	B0303.4.1	7.61	7.09	1.44	0.52
B0303.4	B0303.4	B0303.4.2	7.75	7.47	1.21	0.28
B0303.7	B0303.7	B0303.7	7.66	5.39	4.81	2.27	1
sdz-1	B0303.8	B0303.8	2.17	1.65	1.43	0.52
B0303.9	B0303.9	B0303.9	6.88	6.06	1.76	0.82
hlh-1	B0304.1	B0304.1a	5.54	4.28	2.4	1.26
hlh-1	B0304.1	B0304.1b	5.54	4.28	2.4	1.26
hlh-1	B0304.1	B0304.1c	5.54	4.3	2.36	1.24
B0304.2	B0304.2	B0304.2	9	8.89	1.08	0.11
cyp-23A1	B0304.3	B0304.3	4.75	2.75	3.98	1.99	1
B0304.4	B0304.4	B0304.4	8.12	7.64	1.39	0.48
sra-32	B0304.5	B0304.5	2.91	2.07	1.79	0.84
sra-33	B0304.6	B0304.6	2.87	2.81	1.04	0.05
sra-34	B0304.7	B0304.7	2.95	1.68	2.41	1.27
sra-35	B0304.8	B0304.8	3.27	2.39	1.84	0.88
sra-36	B0304.9	B0304.9	2.41	1.26	2.21	1.15
B0310.1	B0310.1	B0310.1	6.06	3.66	5.28	2.4	1
B0310.2	B0310.2	B0310.2.1	4.83	4.11	1.65	0.73
B0310.2	B0310.2	B0310.2.2	4.97	4.3	1.59	0.67
B0310.3	B0310.3	B0310.3	3.12	2.54	1.49	0.58
B0310.4	B0310.4	B0310.4	0	0	1	0
ugt-46	B0310.5	B0310.5	5.56	4.76	1.74	0.8
B0310.6	B0310.6	B0310.6	4.37	2.21	4.46	2.16	1
cyp-29A4	B0331.1	B0331.1	2.27	2.52	0.84	-0.24
B0331.2	B0331.2	B0331.2	4.63	2	6.18	2.63	1
B0334.1	B0334.1	B0334.1.1	8.84	8.02	1.76	0.82
B0334.1	B0334.1	B0334.1.2	9.01	8.21	1.74	0.8
B0334.10	B0334.10	B0334.10	4.71	3.1	3.06	1.61
ooc-3	B0334.11	B0334.11a	7.59	6.31	2.43	1.28
ooc-3	B0334.11	B0334.11b	7.85	6.57	2.42	1.27
B0334.13	B0334.13	B0334.13	5.34	3.63	3.26	1.71
twk-5	B0334.2	B0334.2a	5.98	5.25	1.66	0.73
twk-5	B0334.2	B0334.2b	6.59	5.73	1.81	0.86
B0334.3	B0334.3	B0334.3a.1	8.69	8.14	1.47	0.56
B0334.3	B0334.3	B0334.3a.2	8.68	8.31	1.3	0.37
B0334.3	B0334.3	B0334.3b	8.26	7.71	1.47	0.56
B0334.4	B0334.4	B0334.4	8.61	8.16	1.37	0.46
B0334.5	B0334.5	B0334.5	9.13	8.19	1.92	0.94
B0334.6	B0334.6	B0334.6	4.65	2.6	4.14	2.05	1
srh-44	B0334.7	B0334.7	3.47	2.57	1.86	0.9
age-1	B0334.8	B0334.8	7.6	6.81	1.73	0.79
wrm-1	B0336.1	B0336.1.1	8.51	7.75	1.69	0.76
wrm-1	B0336.1	B0336.1.2	8.59	7.89	1.62	0.7
rpl-23	B0336.10	B0336.10.1	11.84	11.27	1.48	0.56
rpl-23	B0336.10	B0336.10.2	11.84	11.27	1.48	0.56
rpl-23	B0336.10	B0336.10.3	12.06	11.5	1.47	0.56
rpl-23	B0336.10	B0336.10.4	12.06	11.5	1.47	0.56
B0336.11	B0336.11	B0336.11a	5.86	4.75	2.16	1.11
B0336.11	B0336.11	B0336.11b	5.43	4.82	1.53	0.61
B0336.12	B0336.12	B0336.12	2.77	3.36	0.67	-0.59
B0336.13	B0336.13	B0336.13	8.77	8.54	1.17	0.23
arf-1.2	B0336.2	B0336.2.1	10.99	10.15	1.79	0.84
arf-1.2	B0336.2	B0336.2.2	11.34	10.4	1.93	0.95
B0336.3	B0336.3	B0336.3	9.63	9.02	1.53	0.61
rgs-5	B0336.4	B0336.4	6.13	4.91	2.33	1.22
B0336.5	B0336.5	B0336.5a	8.22	8.22	1	0
B0336.5	B0336.5	B0336.5b	7.58	7.3	1.22	0.28
B0336.6	B0336.6	B0336.6.1	9.19	8.64	1.46	0.55
B0336.6	B0336.6	B0336.6.2	9.44	8.89	1.47	0.55
B0336.7	B0336.7	B0336.7a	6.62	6.1	1.43	0.52
B0336.7	B0336.7	B0336.7b.1	6.63	6.1	1.44	0.53
B0336.7	B0336.7	B0336.7b.2	7.76	6.49	2.41	1.27
lgg-3	B0336.8	B0336.8	8.14	7.08	2.09	1.06
swp-1	B0336.9	B0336.9a	7.31	6.64	1.59	0.67
swp-1	B0336.9	B0336.9b.1	7.15	6.38	1.7	0.77
swp-1	B0336.9	B0336.9b.2	7.14	6.49	1.57	0.65
swp-1	B0336.9	B0336.9c	5.62	5.08	1.46	0.54
swp-1	B0336.9	B0336.9d	7.14	6.49	1.57	0.65
swp-1	B0336.9	B0336.9e	7.15	6.28	1.82	0.87
wrt-9	B0344.2	B0344.2	7.49	2.99	22.62	4.5	1
B0348.1	B0348.1	B0348.1	1.98	1.23	1.68	0.75
B0348.2	B0348.2	B0348.2	4.69	2.36	5.03	2.33	1
egl-8	B0348.4	B0348.4a	8.5	7.24	2.4	1.26
egl-8	B0348.4	B0348.4b	8.37	7.07	2.46	1.3
egl-8	B0348.4	B0348.4c	8.11	7.05	2.07	1.05
B0348.5	B0348.5	B0348.5	3.14	2.77	1.29	0.37
ife-3	B0348.6	B0348.6a.1	9.86	9.26	1.51	0.6
ife-3	B0348.6	B0348.6a.2	9.4	8.7	1.63	0.71
ife-3	B0348.6	B0348.6b	10.5	10.19	1.24	0.31
ife-3	B0348.6	B0348.6c	10.5	10.19	1.24	0.31
unc-44	B0350.2	B0350.2a.1	10.18	8.79	2.61	1.38
unc-44	B0350.2	B0350.2a.2	9.97	8.48	2.81	1.49
unc-44	B0350.2	B0350.2b.1	10.48	9.03	2.75	1.46
unc-44	B0350.2	B0350.2b.2	10.51	9.06	2.72	1.44
unc-44	B0350.2	B0350.2c.1	10.3	8.83	2.76	1.47
unc-44	B0350.2	B0350.2c.2	10.1	8.54	2.95	1.56
unc-44	B0350.2	B0350.2d.1	9.87	8.23	3.12	1.64
unc-44	B0350.2	B0350.2d.2	10.51	9.06	2.72	1.44
unc-44	B0350.2	B0350.2d.3	10.37	8.93	2.71	1.44
unc-44	B0350.2	B0350.2e.1	10.34	8.88	2.76	1.46
unc-44	B0350.2	B0350.2e.2	10.12	8.56	2.95	1.56
unc-44	B0350.2	B0350.2f.1	9.92	8.16	3.38	1.76
unc-44	B0350.2	B0350.2f.2	9.85	8.13	3.3	1.72
unc-44	B0350.2	B0350.2g.1	10.61	9.03	2.98	1.57
unc-44	B0350.2	B0350.2g.2	10.05	8.38	3.19	1.67
B0350.3	B0350.3	B0350.3	3.03	1.81	2.33	1.22
B0353.1	B0353.1	B0353.1	6.91	5.84	2.09	1.07
B0361.10	B0361.10	B0361.10	8.8	8.33	1.38	0.47
B0361.11	B0361.11	B0361.11	2.78	1.89	1.85	0.89
B0361.2	B0361.2	B0361.2a	7.7	7	1.63	0.7
B0361.2	B0361.2	B0361.2b	6.9	5.9	2	1
B0361.3	B0361.3	B0361.3.1	7.83	7.09	1.66	0.73
B0361.3	B0361.3	B0361.3.2	7.94	7.24	1.62	0.7
B0361.4	B0361.4	B0361.4	5.37	3.31	4.17	2.06	1
psd-1	B0361.5	B0361.5a	8.78	7.35	2.69	1.43
psd-1	B0361.5	B0361.5b	8.46	7.33	2.18	1.13
B0361.6	B0361.6	B0361.6	7.54	6.68	1.82	0.86
B0361.7	B0361.7	B0361.7	7.94	7.12	1.76	0.82
B0361.8	B0361.8	B0361.8.1	8.1	7.37	1.67	0.74
B0361.8	B0361.8	B0361.8.2	8.28	7.43	1.8	0.84
B0361.9	B0361.9	B0361.9	6.64	6.15	1.4	0.48
B0365.1	B0365.1	B0365.1	9.97	9.32	1.56	0.64
eat-6	B0365.3	B0365.3.1	10.69	9.56	2.18	1.12
eat-6	B0365.3	B0365.3.2	10.37	9.24	2.19	1.13
eat-6	B0365.3	B0365.3.3	10.69	9.56	2.18	1.12
B0365.5	B0365.5	B0365.5a	5.36	2.97	5.25	2.39	1
B0365.5	B0365.5	B0365.5b	5.91	3.24	6.38	2.67	1
clec-41	B0365.6	B0365.6.1	7.78	6.75	2.04	1.03
clec-41	B0365.6	B0365.6.2	7.78	6.75	2.04	1.03
clec-41	B0365.6	B0365.6.3	7.78	6.75	2.04	1.03
B0365.7	B0365.7	B0365.7	2.75	2.07	1.61	0.68
B0379.1	B0379.1	B0379.1	7.38	6.72	1.58	0.66
B0379.2	B0379.2	B0379.2	3.49	1.33	4.47	2.16	1
mut-16	B0379.3	B0379.3a	9.11	8.54	1.48	0.56
mut-16	B0379.3	B0379.3b	9.17	8.62	1.46	0.55
tag-188	B0379.4	B0379.4a	7.37	6.86	1.43	0.51
tag-188	B0379.4	B0379.4b	7.35	6.82	1.44	0.53
B0379.6	B0379.6	B0379.6	4.51	3.2	2.48	1.31
B0379.7	B0379.7	B0379.7.1	2.42	3.04	0.65	-0.62
B0379.7	B0379.7	B0379.7.2	2.77	3.55	0.58	-0.78
B0391.10	B0391.10	B0391.10	5.27	4.18	2.13	1.09
B0391.11	B0391.11	B0391.11	2.96	2.22	1.67	0.74
str-263	B0391.12	B0391.12	3.14	3.61	0.72	-0.47
B0391.3	B0391.3	B0391.3	2.65	1.43	2.32	1.22
str-12	B0391.4	B0391.4	2.7	1.29	2.65	1.4
B0391.5	B0391.5	B0391.5	4.11	5.28	0.44	-1.17		1
B0391.6	B0391.6	B0391.6	3.72	2.56	2.23	1.16
B0391.9	B0391.9	B0391.9	5.28	3.37	3.77	1.91	1
rps-0	B0393.1	B0393.1.1	12.24	11.32	1.9	0.92
rps-0	B0393.1	B0393.1.2	12.34	11.4	1.92	0.94
rps-0	B0393.1	B0393.1.3	12.34	11.4	1.92	0.94
rps-0	B0393.1	B0393.1.4	12.34	11.4	1.92	0.94
rbg-3	B0393.2	B0393.2.1	8.31	7.54	1.7	0.76
rbg-3	B0393.2	B0393.2.2	8.86	8.31	1.47	0.55
B0393.3	B0393.3	B0393.3	9.45	9.31	1.11	0.15
B0393.4	B0393.4	B0393.4	3.56	2.15	2.66	1.41
B0393.5	B0393.5	B0393.5	5.76	2.54	9.29	3.22	1
B0393.6	B0393.6	B0393.6	7.9	7.37	1.45	0.53
B0393.7	B0393.7	B0393.7	3.89	2.87	2.02	1.02
B0393.8	B0393.8	B0393.8	8.46	7.37	2.13	1.09
B0393.9	B0393.9	B0393.9.1	4.49	4.38	1.07	0.1
B0393.9	B0393.9	B0393.9.2	5.11	4.76	1.28	0.35
nhx-1	B0395.1	B0395.1	3.89	3.45	1.36	0.44
B0395.2	B0395.2	B0395.2	6.78	2.85	15.19	3.93	1
B0395.3	B0395.3	B0395.3.1	7.74	6.79	1.94	0.95
B0395.3	B0395.3	B0395.3.2	8	7.05	1.94	0.95
B0399.1	B0399.1	B0399.1a	6.78	4.96	3.54	1.82	1
B0399.1	B0399.1	B0399.1b	6.82	5.06	3.4	1.76
B0399.1	B0399.1	B0399.1c	6.46	4.62	3.58	1.84	1
B0399.1	B0399.1	B0399.1d	6.49	4.81	3.2	1.68
B0399.1	B0399.1	B0399.1e	6.69	4.96	3.32	1.73
B0399.2	B0399.2	B0399.2	5.42	2.66	6.76	2.76	1
ubc-17	B0403.2	B0403.2	5	2.89	4.3	2.11	1
B0403.3	B0403.3	B0403.3	8.22	5.57	6.3	2.66	1
tag-320	B0403.4	B0403.4	9.95	8.66	2.45	1.29
B0403.5	B0403.5	B0403.5	7.12	3.81	9.93	3.31	1
B0403.6	B0403.6	B0403.6	4.14	3.64	1.41	0.5
B0410.1	B0410.1	B0410.1	4.16	3.07	2.14	1.1
vang-1	B0410.2	B0410.2a	6.91	6.77	1.1	0.14
vang-1	B0410.2	B0410.2b	6.77	6.52	1.19	0.25
B0410.3	B0410.3	B0410.3	5.86	4.94	1.89	0.92
dac-1	B0412.1	B0412.1a	4.3	2.61	3.23	1.69
dac-1	B0412.1	B0412.1b	4.23	2.4	3.54	1.83	1
daf-7	B0412.2	B0412.2	7.07	3.56	11.42	3.51	1
B0412.3	B0412.3	B0412.3.1	8.21	7.57	1.56	0.64
B0412.3	B0412.3	B0412.3.2	8.28	7.57	1.63	0.7
rps-29	B0412.4	B0412.4.1	10.16	9.88	1.21	0.28
rps-29	B0412.4	B0412.4.2	10.23	9.86	1.3	0.38
rps-29	B0412.4	B0412.4.3	10.23	9.86	1.3	0.38
rps-29	B0412.4	B0412.4.4	10.16	9.88	1.21	0.28
srz-4	B0414.1	B0414.1	3.79	2.42	2.58	1.37
rnt-1	B0414.2	B0414.2	4.03	2.78	2.38	1.25
hil-5	B0414.3	B0414.3	11.5	11.32	1.13	0.18
cpb-3	B0414.5	B0414.5	8.57	7.99	1.5	0.58
glh-3	B0414.6	B0414.6	7.08	6.55	1.44	0.53
mtk-1	B0414.7	B0414.7a	7.79	6.66	2.19	1.13
mtk-1	B0414.7	B0414.7b	7.82	6.67	2.21	1.15
B0414.8	B0414.8	B0414.8a	7.62	6.91	1.63	0.71
B0414.8	B0414.8	B0414.8b	7.59	6.87	1.65	0.72
B0416.1	B0416.1	B0416.1	4.98	3.13	3.61	1.85	1
B0416.2	B0416.2	B0416.2	2.9	3.69	0.58	-0.78
B0416.3	B0416.3	B0416.3	5.24	3.66	2.98	1.58
B0416.4	B0416.4	B0416.4	6.42	7.07	0.64	-0.65
B0416.5	B0416.5	B0416.5a.1	9.58	8.84	1.67	0.74
B0416.5	B0416.5	B0416.5a.2	8.29	7.7	1.51	0.59
B0416.5	B0416.5	B0416.5b	9.92	9.24	1.61	0.69
gly-13	B0416.6	B0416.6	6.81	5.31	2.83	1.5
B0416.7	B0416.7	B0416.7a	2.82	1.99	1.78	0.83
B0416.7	B0416.7	B0416.7b	3.15	1.56	3	1.59
B0432.1	B0432.1	B0432.1	2.37	1.35	2.03	1.02
B0432.10	B0432.10	B0432.10	6.81	6.19	1.54	0.62
B0432.11	B0432.11	B0432.11	3.67	2.29	2.6	1.38
B0432.12	B0432.12	B0432.12	3.35	1.73	3.06	1.61
B0432.13	B0432.13	B0432.13.1	7.18	6.03	2.22	1.15
B0432.13	B0432.13	B0432.13.2	7.45	6.21	2.36	1.24
B0432.14	B0432.14	B0432.14	7.71	5.5	4.62	2.21	1
djr-1.1	B0432.2	B0432.2	8.75	8.74	1.01	0.01
B0432.3	B0432.3	B0432.3	8.04	7.52	1.44	0.52
B0432.4	B0432.4	B0432.4	8.09	7.31	1.72	0.78
cat-2	B0432.5	B0432.5a	3.24	2.54	1.62	0.69
cat-2	B0432.5	B0432.5b	3.27	2.48	1.74	0.8
B0432.6	B0432.6	B0432.6	6.45	6.19	1.2	0.26
B0432.7	B0432.7	B0432.7	5	4.55	1.37	0.45
B0432.8	B0432.8	B0432.8	6.82	6.71	1.08	0.11
B0432.9	B0432.9	B0432.9	2.9	3.17	0.83	-0.27
lin-8	B0454.1	B0454.1	7.53	6.92	1.53	0.61
sri-30	B0454.10	B0454.10	3.79	2.39	2.64	1.4
sri-31	B0454.2	B0454.2	4.43	2.47	3.9	1.96	1
sri-28	B0454.3	B0454.3	2.4	2.03	1.29	0.37
sri-29	B0454.4	B0454.4	3.99	2.58	2.66	1.41
B0454.5	B0454.5	B0454.5	5.81	5.87	0.96	-0.06
B0454.6	B0454.6	B0454.6	6.01	4.16	3.61	1.85	1
clec-2	B0454.7	B0454.7	1.5	2.32	0.57	-0.82		1
B0454.8	B0454.8	B0454.8	3.99	3.41	1.49	0.57
B0454.9	B0454.9	B0454.9	6.23	5.62	1.53	0.61
lat-1	B0457.1	B0457.1a	9.74	8.92	1.77	0.82
lat-1	B0457.1	B0457.1b	9.49	8.42	2.11	1.07
lat-1	B0457.1	B0457.1c	9.56	8.59	1.96	0.97
B0457.2	B0457.2	B0457.2	5.43	4.37	2.08	1.06
B0457.4	B0457.4	B0457.4	3.89	2.26	3.1	1.63
B0457.6	B0457.6	B0457.6	9	6.39	6.14	2.62	1
B0462.1	B0462.1	B0462.1	2.76	2.58	1.13	0.18
fbxb-119	B0462.3	B0462.3	3.24	2.34	1.87	0.91
B0462.4	B0462.4	B0462.4	2.7	2.43	1.21	0.28
drs-1	B0464.1	B0464.1.1	9.66	8.43	2.35	1.23
drs-1	B0464.1	B0464.1.2	9.83	8.61	2.33	1.22
B0464.2	B0464.2	B0464.2	8.84	7.82	2.03	1.02
nlp-36	B0464.3	B0464.3.1	9.92	8.92	1.99	0.99
nlp-36	B0464.3	B0464.3.2	9.92	8.92	1.99	0.99
bre-3	B0464.4	B0464.4.1	8.11	7.03	2.11	1.07
bre-3	B0464.4	B0464.4.2	9.13	7.87	2.4	1.27
spk-1	B0464.5	B0464.5a	10.33	9.43	1.86	0.9
spk-1	B0464.5	B0464.5b.1	10.26	9.37	1.85	0.89
spk-1	B0464.5	B0464.5b.2	10.47	9.58	1.85	0.89
spk-1	B0464.5	B0464.5c.1	9.99	9.01	1.98	0.99
spk-1	B0464.5	B0464.5c.2	9.87	8.91	1.93	0.95
B0464.6	B0464.6	B0464.6.1	8.58	7.97	1.52	0.61
B0464.6	B0464.6	B0464.6.2	8.8	8.08	1.65	0.73
B0464.6	B0464.6	B0464.6.3	8.85	8.19	1.58	0.66
baf-1	B0464.7	B0464.7.1	10.46	9.99	1.39	0.47
baf-1	B0464.7	B0464.7.2	7.03	6.74	1.22	0.29
tag-342	B0464.8	B0464.8	7.53	7.69	0.9	-0.16
B0464.9	B0464.9	B0464.9	8.49	8.18	1.24	0.31
jnk-1	B0478.1	B0478.1a	5.43	2.98	5.47	2.45	1
jnk-1	B0478.1	B0478.1b.1	5.44	2.97	5.55	2.47	1
jnk-1	B0478.1	B0478.1b.2	5.44	2.97	5.55	2.47	1
jnk-1	B0478.1	B0478.1b.3	5.43	2.98	5.47	2.45	1
jnk-1	B0478.1	B0478.1b.4	5.44	2.97	5.55	2.47	1
B0478.3	B0478.3	B0478.3	1.58	1.9	0.8	-0.32
B0491.1	B0491.1	B0491.1	7.92	6.99	1.91	0.93
sqt-1	B0491.2	B0491.2.1	8.75	4.49	19.13	4.26	1
sqt-1	B0491.2	B0491.2.2	8.75	4.47	19.4	4.28	1
sqt-1	B0491.2	B0491.2.3	10.33	4.91	42.8	5.42	1
B0491.3	B0491.3	B0491.3	3.87	2.09	3.44	1.78	1
B0491.4	B0491.4	B0491.4	5.01	2.75	4.78	2.26	1
B0491.5	B0491.5	B0491.5.1	8.62	7.55	2.1	1.07
B0491.5	B0491.5	B0491.5.2	8.33	7.31	2.02	1.01
B0491.5	B0491.5	B0491.5.3	9.53	8.85	1.6	0.68
B0491.5	B0491.5	B0491.5.4	9.55	8.83	1.64	0.71
B0491.6	B0491.6	B0491.6.1	7.59	6.07	2.87	1.52
B0491.6	B0491.6	B0491.6.2	6.52	5.24	2.43	1.28
B0491.7	B0491.7	B0491.7	7.93	7.48	1.36	0.45
clh-2	B0491.8	B0491.8a	5.35	3.08	4.81	2.27	1
clh-2	B0491.8	B0491.8b	5.38	3.06	5	2.32	1
clh-2	B0491.8	B0491.8c	5.48	3.2	4.84	2.27	1
sre-1	B0495.1	B0495.1	3.95	1.31	6.25	2.64	1
tag-178	B0495.10	B0495.10a	6.1	3.41	6.49	2.7	1
tag-178	B0495.10	B0495.10b	6.54	3.73	7.03	2.81	1
tag-178	B0495.10	B0495.10c	5.96	3.37	6.04	2.6	1
B0495.2	B0495.2	B0495.2	8.32	7.59	1.66	0.73
nhx-2	B0495.4	B0495.4	6.89	4.93	3.9	1.96	1
B0495.5	B0495.5	B0495.5.1	6.75	5.93	1.77	0.82
B0495.5	B0495.5	B0495.5.2	6.84	6.03	1.75	0.81
B0495.6	B0495.6	B0495.6	8.22	7.13	2.13	1.09
B0495.7	B0495.7	B0495.7.1	8.58	7.6	1.98	0.98
B0495.7	B0495.7	B0495.7.2	8.43	7.47	1.94	0.96
B0495.8	B0495.8	B0495.8a	8.28	7.54	1.67	0.74
B0495.8	B0495.8	B0495.8b	7.36	6.58	1.71	0.78
B0495.9	B0495.9	B0495.9	7.23	6.55	1.6	0.68
B0496.1	B0496.1	B0496.1	1.37	2.17	0.57	-0.8
B0496.2	B0496.2	B0496.2	3.72	2.27	2.75	1.46
B0496.3	B0496.3	B0496.3a	7.23	4.75	5.59	2.48	1
B0496.3	B0496.3	B0496.3b	7.17	4.78	5.22	2.38	1
B0496.3	B0496.3	B0496.3c	7.41	4.88	5.76	2.53	1
B0496.4	B0496.4	B0496.4	5.7	2.08	12.3	3.62	1
B0496.5	B0496.5	B0496.5	3.48	1.63	3.58	1.84	1
B0496.6	B0496.6	B0496.6	2.28	1.49	1.73	0.79
B0496.7	B0496.7	B0496.7	8.85	6.1	6.71	2.75	1
tag-224	B0496.8	B0496.8	8.38	6.41	3.94	1.98	1
B0507.1	B0507.1	B0507.1	6.14	3.78	5.14	2.36	1
B0507.10	B0507.10	B0507.10	6.72	4.22	5.66	2.5	1
srx-115	B0507.11	B0507.11	2.78	2.07	1.64	0.72
B0507.2	B0507.2	B0507.2	8.27	6.15	4.35	2.12	1
B0507.3	B0507.3	B0507.3a	5.92	4.26	3.16	1.66
B0507.3	B0507.3	B0507.3b	6.39	5.69	1.63	0.71
B0507.4	B0507.4	B0507.4	2.57	1.55	2.02	1.02
B0507.5	B0507.5	B0507.5	2.6	2.4	1.15	0.2
B0507.6	B0507.6	B0507.6	4.08	2.33	3.35	1.75
B0507.7	B0507.7	B0507.7	3.01	1.33	3.21	1.68
B0507.8	B0507.8	B0507.8	4.33	2.93	2.64	1.4
B0507.9	B0507.9	B0507.9	4.34	1.82	5.74	2.52	1
fkb-7	B0511.1	B0511.1	4.82	4.47	1.28	0.35
eif-3.E	B0511.10	B0511.10	8.69	7.85	1.8	0.84
B0511.11	B0511.11	B0511.11	5.02	3.79	2.35	1.23
B0511.12	B0511.12	B0511.12	8.32	7.38	1.92	0.94
B0511.13	B0511.13	B0511.13	6.54	6.28	1.19	0.26
B0511.14	B0511.14	B0511.14a	6.53	4.94	3	1.58
B0511.14	B0511.14	B0511.14b	6.15	4.41	3.35	1.75
B0511.2	B0511.2	B0511.2	4.81	4.39	1.34	0.42
fbxa-125	B0511.3	B0511.3	2.19	2.26	0.95	-0.07
tag-344	B0511.4	B0511.4	2.6	1.15	2.73	1.45
B0511.5	B0511.5	B0511.5	4.11	2.68	2.7	1.43
B0511.6	B0511.6	B0511.6.1	8.61	7.75	1.81	0.86
B0511.6	B0511.6	B0511.6.2	9.08	8.15	1.9	0.93
B0511.7	B0511.7	B0511.7	8.46	7.81	1.57	0.65
tag-264	B0511.8	B0511.8.1	6.9	6.33	1.49	0.58
tag-264	B0511.8	B0511.8.2	7.22	6.74	1.4	0.48
mat-4	B0511.9	B0511.9a	8.54	8.24	1.23	0.3
mat-4	B0511.9	B0511.9b	8.64	8.03	1.53	0.61
lin-66	B0513.1	B0513.1	9.71	9.07	1.56	0.64
B0513.2	B0513.2	B0513.2	7.99	7.79	1.15	0.2
rpl-29	B0513.3	B0513.3.1	11.85	11.2	1.57	0.65
rpl-29	B0513.3	B0513.3.2	12.51	11.92	1.51	0.59
B0513.4	B0513.4	B0513.4	9.39	8.67	1.65	0.72
B0513.5	B0513.5	B0513.5	6.31	4.76	2.93	1.55
B0513.6	B0513.6	B0513.6	3.25	2.05	2.3	1.2
B0513.9	B0513.9	B0513.9a	5.25	4.23	2.03	1.02
B0513.9	B0513.9	B0513.9b.1	5.67	4.21	2.76	1.46
B0513.9	B0513.9	B0513.9b.2	6.15	4.73	2.69	1.43
kin-31	B0523.1	B0523.1	3.44	2.88	1.48	0.56
pgl-2	B0523.3	B0523.3	7.29	6.89	1.32	0.4
fli-1	B0523.5	B0523.5	7.66	6.17	2.8	1.49
B0524.1	B0524.1	B0524.1	8.32	7.29	2.04	1.03
B0524.2	B0524.2	B0524.2	4.25	2.55	3.25	1.7
B0524.3	B0524.3	B0524.3	2.92	2.47	1.37	0.45
B0524.4	B0524.4	B0524.4	2.16	2.65	0.71	-0.49
B0524.5	B0524.5	B0524.5	2.36	1.08	2.44	1.28
B0524.6	B0524.6	B0524.6	7.13	6.55	1.5	0.58
B0524.7	B0524.7	B0524.7	7.48	7.43	1.03	0.05
tpa-1	B0545.1	B0545.1a	7.71	6.08	3.09	1.63
tpa-1	B0545.1	B0545.1b.1	7.92	6.15	3.42	1.77	1
tpa-1	B0545.1	B0545.1b.2	7.78	6.33	2.74	1.45
B0545.3	B0545.3	B0545.3	5.63	3.03	6.05	2.6	1
B0545.4	B0545.4	B0545.4	4.25	3.27	1.98	0.98
37377	B0546.1	B0546.1.1	10.58	10.38	1.15	0.2
37377	B0546.1	B0546.1.2	7.05	6.92	1.1	0.13
37377	B0546.1	B0546.1.3	10.58	10.38	1.15	0.2
B0546.2	B0546.2	B0546.2.1	7.87	6.92	1.93	0.95
B0546.2	B0546.2	B0546.2.2	7.99	7.11	1.85	0.89
B0546.3	B0546.3	B0546.3	7.11	7.02	1.07	0.09
B0546.4	B0546.4	B0546.4a	8.1	7.18	1.88	0.91
B0546.4	B0546.4	B0546.4b	7.48	6.58	1.87	0.91
B0546.5	B0546.5	B0546.5	3.07	1.37	3.23	1.69
csn-5	B0547.1	B0547.1.1	9.35	8.75	1.52	0.61
csn-5	B0547.1	B0547.1.2	9.47	8.93	1.45	0.54
B0547.2	B0547.2	B0547.2	2.49	1.07	2.68	1.42
srd-8	B0547.4	B0547.4	1.33	1.55	0.86	-0.21
B0554.1	B0554.1	B0554.1	1.21	2.06	0.56	-0.85		1
B0554.2	B0554.2	B0554.2	2.57	2.04	1.44	0.52
B0554.3	B0554.3	B0554.3	1	2.16	0.45	-1.16		1
B0554.4	B0554.4	B0554.4	3.07	1.43	3.12	1.64
B0554.5	B0554.5	B0554.5	3.54	2.55	1.98	0.99
dod-20	B0554.6	B0554.6	4.88	2.38	5.67	2.5	1
B0554.7	B0554.7	B0554.7	1.58	2.27	0.62	-0.7
B0563.1	B0563.1	B0563.1	3	3.64	0.64	-0.64
tsp-11	B0563.2	B0563.2	5.55	3.62	3.81	1.93	1
tag-132	B0563.4	B0563.4	7.76	7.1	1.58	0.66
B0563.5	B0563.5	B0563.5	6.18	4.94	2.36	1.24
B0563.6	B0563.6	B0563.6a	5.22	4.14	2.11	1.08
B0563.6	B0563.6	B0563.6b.1	5.69	4.33	2.58	1.36
B0563.6	B0563.6	B0563.6b.2	5.67	4.22	2.74	1.45
B0563.7	B0563.7	B0563.7	5.19	3.77	2.68	1.42
B0563.8	B0563.8	B0563.8	2.1	3.05	0.52	-0.95		1
B0563.9	B0563.9	B0563.9	1	3.87	0.14	-2.87		1
unc-30	B0564.10	B0564.10a	4.79	3.05	3.32	1.73
unc-30	B0564.10	B0564.10b	5.03	3.05	3.94	1.98	1
B0564.11	B0564.11	B0564.11	7.78	7.02	1.69	0.76
B0564.1	B0564.1	B0564.1a	8.33	7.35	1.98	0.98
tin-9.2	B0564.1	B0564.1b.1	8.38	7.29	2.13	1.09
tin-9.2	B0564.1	B0564.1b.2	8.57	7.55	2.02	1.02
B0564.2	B0564.2	B0564.2	7.22	6.2	2.02	1.01
B0564.3	B0564.3	B0564.3.1	6.62	5.52	2.14	1.1
B0564.3	B0564.3	B0564.3.2	6.62	5.52	2.14	1.1
B0564.4	B0564.4	B0564.4	3.18	2.66	1.44	0.52
B0564.6	B0564.6	B0564.6a	5.87	4.69	2.27	1.18
B0564.6	B0564.6	B0564.6b	6.15	5.03	2.18	1.12
B0564.7	B0564.7	B0564.7.1	8.08	7.23	1.8	0.85
B0564.7	B0564.7	B0564.7.2	8.24	7.3	1.91	0.94
B0564.9	B0564.9	B0564.9	6.17	4.04	4.35	2.12	1
BE0003N10.1	BE0003N10.1	BE0003N10.1	7.32	6.28	2.05	1.04
BE0003N10.2	BE0003N10.2	BE0003N10.2	7.38	6.51	1.82	0.87
BE0003N10.3	BE0003N10.3	BE0003N10.3	4.15	3.16	1.98	0.99
BE10.1	BE10.1	BE10.1	3	1.57	2.7	1.43
BE10.2	BE10.2	BE10.2	6.68	3.19	11.28	3.5	1
BE10.3	BE10.3	BE10.3	3.51	2.61	1.87	0.9
BE10.4	BE10.4	BE10.4	3.11	3.15	0.98	-0.03
BE10.5	BE10.5	BE10.5	1.97	1.84	1.1	0.13
C01A2.1	C01A2.1	C01A2.1	4.65	2.15	5.65	2.5	1
C01A2.2	C01A2.2	C01A2.2	5.78	4.47	2.47	1.31
C01A2.3	C01A2.3	C01A2.3	6.63	5.9	1.67	0.74
C01A2.4	C01A2.4	C01A2.4	8.02	7.29	1.66	0.73
C01A2.5	C01A2.5	C01A2.5	7.33	6.83	1.42	0.5
C01A2.6	C01A2.6	C01A2.6	3.52	2.24	2.43	1.28
nlp-38	C01A2.7	C01A2.7.1	6.4	3.95	5.47	2.45	1
nlp-38	C01A2.7	C01A2.7.2	6.41	4.04	5.19	2.38	1
drh-2	C01B10.1	C01B10.1	7.08	4.93	4.43	2.15	1
C01B10.10	C01B10.10	C01B10.10	4.64	3.6	2.06	1.05
C01B10.11	C01B10.11	C01B10.11	8.21	6.54	3.19	1.67
C01B10.3	C01B10.3	C01B10.3	6.69	5.45	2.37	1.24
C01B10.4	C01B10.4	C01B10.4	3.2	2.72	1.4	0.48
hil-7	C01B10.5	C01B10.5a	7.35	5.32	4.09	2.03	1
hil-7	C01B10.5	C01B10.5b.1	8.53	6.41	4.34	2.12	1
hil-7	C01B10.5	C01B10.5b.2	8.95	6.54	5.31	2.41	1
hil-7	C01B10.5	C01B10.5c	8.44	6.32	4.34	2.12	1
hil-7	C01B10.5	C01B10.5e	10.41	7.99	5.37	2.42	1
C01B10.6	C01B10.6	C01B10.6a.1	9.9	8.77	2.19	1.13
C01B10.6	C01B10.6	C01B10.6a.2	9.9	8.77	2.19	1.13
C01B10.6	C01B10.6	C01B10.6b	9.69	8.61	2.11	1.08
C01B10.7	C01B10.7	C01B10.7	2.73	2.07	1.58	0.66
C01B10.8	C01B10.8	C01B10.8.1	8.49	7.47	2.04	1.03
C01B10.8	C01B10.8	C01B10.8.2	8.54	7.56	1.98	0.99
C01B10.9	C01B10.9	C01B10.9	7.82	7.15	1.59	0.67
sqt-2	C01B12.1	C01B12.1	9.23	5.5	13.3	3.73	1
C01B12.2	C01B12.2	C01B12.2	7.89	6.34	2.94	1.55
C01B12.3	C01B12.3	C01B12.3	5.04	3.07	3.94	1.98	1
C01B12.4	C01B12.4	C01B12.4	3.21	2.85	1.29	0.36
C01B12.5	C01B12.5	C01B12.5	3.27	1.96	2.49	1.31
C01B12.7	C01B12.7	C01B12.7	6.77	4.91	3.62	1.86	1
C01B12.8	C01B12.8	C01B12.8	7.97	7.82	1.11	0.15
str-257	C01B4.1	C01B4.1	2.37	1.4	1.96	0.97
str-76	C01B4.10	C01B4.10	2.76	1.94	1.77	0.82
str-258	C01B4.3	C01B4.3	2.61	1.95	1.58	0.66
srd-61	C01B4.5	C01B4.5	2.93	2.72	1.16	0.21
C01B4.6	C01B4.6	C01B4.6	6.42	6.34	1.05	0.07
C01B4.7	C01B4.7	C01B4.7	7.74	5.67	4.19	2.07	1
C01B4.8	C01B4.8	C01B4.8	5.17	2.44	6.64	2.73	1
C01B4.9	C01B4.9	C01B4.9	8.75	8.59	1.12	0.16
C01B7.1	C01B7.1	C01B7.1a.1	7.25	6.04	2.31	1.21
C01B7.1	C01B7.1	C01B7.1a.2	7.25	6.06	2.3	1.2
C01B7.1	C01B7.1	C01B7.1b	8.45	6.74	3.28	1.71
C01B7.3	C01B7.3	C01B7.3	4.01	2.27	3.35	1.74
tag-117	C01B7.4	C01B7.4	7.35	5.17	4.55	2.19	1
C01B7.5	C01B7.5	C01B7.5	4.49	2.35	4.39	2.13	1
rpm-1	C01B7.6	C01B7.6	7.29	5.65	3.11	1.64
C01B7.7	C01B7.7	C01B7.7	3.87	3.44	1.35	0.43
C01B9.1	C01B9.1	C01B9.1	3.62	2.59	2.04	1.03
clc-2	C01C10.1	C01C10.1	6.31	4.11	4.59	2.2	1
C01C10.2	C01C10.2	C01C10.2a	6.64	5.21	2.69	1.43
C01C10.2	C01C10.2	C01C10.2b	6.11	4.28	3.55	1.83	1
acl-12	C01C10.3	C01C10.3	8.24	6.75	2.81	1.49
clc-5	C01C10.4	C01C10.4	6.7	5.03	3.18	1.67
nlp-1	C01C4.1	C01C4.1	6.91	5.25	3.15	1.66
C01C4.2	C01C4.2	C01C4.2	2.49	2.03	1.38	0.46
C01C4.3	C01C4.3	C01C4.3a	6.65	4.62	4.09	2.03	1
C01C4.3	C01C4.3	C01C4.3b	6.9	4.95	3.84	1.94	1
ark-1	C01C7.1	C01C7.1	7.42	6.42	2.01	1.01
C01F1.1	C01F1.1	C01F1.1	8.39	7.82	1.49	0.57
C01F1.2	C01F1.2	C01F1.2	7.52	7.08	1.36	0.44
C01F1.3	C01F1.3	C01F1.3a.1	7.72	5.87	3.61	1.85	1
C01F1.3	C01F1.3	C01F1.3a.2	7.76	5.88	3.68	1.88	1
C01F1.3	C01F1.3	C01F1.3b	6.85	5.62	2.34	1.23
C01F1.4	C01F1.4	C01F1.4	4.79	3.86	1.9	0.93
C01F1.5	C01F1.5	C01F1.5	6.64	3.6	8.21	3.04	1
C01F1.6	C01F1.6	C01F1.6	8.58	7.41	2.25	1.17
C01F4.2	C01F4.2	C01F4.2a	5.81	3.77	4.1	2.04	1
C01F4.2	C01F4.2	C01F4.2b	5.73	3.37	5.11	2.35	1
C01F6.1	C01F6.1	C01F6.1	7.48	6.54	1.92	0.94
C01F6.2	C01F6.2	C01F6.2	3.9	2.7	2.3	1.2
fem-3	C01F6.4	C01F6.4	7.01	6.74	1.2	0.27
aly-1	C01F6.5	C01F6.5	9.64	9.21	1.35	0.43
tag-60	C01F6.6	C01F6.6a	9.09	7.46	3.1	1.63
tag-60	C01F6.6	C01F6.6b	9.07	7.39	3.21	1.68
tag-60	C01F6.6	C01F6.6c	8.95	7.41	2.92	1.55
tag-60	C01F6.6	C01F6.6d	8.85	7.28	2.96	1.57
tag-60	C01F6.6	C01F6.6e.1	9.01	7.3	3.26	1.71
tag-60	C01F6.6	C01F6.6e.2	9.17	7.62	2.92	1.55
tag-60	C01F6.6	C01F6.6e.3	8.95	7.34	3.06	1.61
tag-60	C01F6.6	C01F6.6e.4	9.09	7.46	3.1	1.63
tag-60	C01F6.6	C01F6.6e.5	9.3	7.65	3.15	1.65
icl-1	C01F6.8	C01F6.8a	8.78	8.04	1.67	0.74
icl-1	C01F6.8	C01F6.8b	8.51	7.98	1.45	0.53
C01F6.9	C01F6.9	C01F6.9	9.73	9.49	1.18	0.24
C01G10.1	C01G10.1	C01G10.1	2.28	1.97	1.24	0.31
C01G10.10	C01G10.10	C01G10.10	6.77	5.79	1.97	0.98
unc-76	C01G10.11	C01G10.11a.1	9.17	7.94	2.33	1.22
unc-76	C01G10.11	C01G10.11a.2	9.23	8	2.34	1.23
unc-76	C01G10.11	C01G10.11b.1	8.87	7.63	2.37	1.25
unc-76	C01G10.11	C01G10.11b.2	9.06	7.65	2.65	1.41
dnj-3	C01G10.12	C01G10.12	6.1	5.04	2.09	1.07
C01G10.14	C01G10.14	C01G10.14	3.23	1.55	3.21	1.68
C01G10.15	C01G10.15	C01G10.15	4.37	1.28	8.51	3.09	1
C01G10.16	C01G10.16	C01G10.16	2.99	2.44	1.46	0.54
C01G10.17	C01G10.17	C01G10.17	3.89	2.33	2.96	1.56
srx-79	C01G10.2	C01G10.2	2.45	2.06	1.31	0.39
srx-78	C01G10.3	C01G10.3	2.16	1.31	1.8	0.85
C01G10.4	C01G10.4	C01G10.4	2.59	2.72	0.92	-0.13
C01G10.5	C01G10.5	C01G10.5	2.83	2.23	1.52	0.6
C01G10.6	C01G10.6	C01G10.6	3.85	1.95	3.71	1.89	1
C01G10.7	C01G10.7	C01G10.7	8.31	7.73	1.49	0.57
C01G10.8	C01G10.8	C01G10.8.1	9.02	7.85	2.25	1.17
C01G10.8	C01G10.8	C01G10.8.2	9.42	8.19	2.35	1.23
C01G10.9	C01G10.9	C01G10.9	7.44	6.73	1.63	0.71
C01G12.1	C01G12.1	C01G12.1	6.78	4.65	4.37	2.13	1
nspb-8	C01G12.10	C01G12.10	2.71	1.36	2.56	1.35
nspb-9	C01G12.11	C01G12.11	4.18	1.44	6.7	2.74	1
C01G12.13	C01G12.13	C01G12.13	2.74	2.24	1.42	0.5
nspb-7	C01G12.2	C01G12.2	3.67	2.38	2.45	1.3
C01G12.3	C01G12.3	C01G12.3	3.94	3.85	1.07	0.1
C01G12.5	C01G12.5	C01G12.5	2.79	2.03	1.69	0.76
nspb-10	C01G12.6	C01G12.6	3.27	3.89	0.65	-0.62
C01G12.7	C01G12.7	C01G12.7	5.02	2.61	5.28	2.4	1
C01G12.8	C01G12.8	C01G12.8	4.17	2.76	2.65	1.41
C01G12.9	C01G12.9	C01G12.9	1.76	2.02	0.83	-0.26
tag-292	C01G5.2	C01G5.2	7.7	7.66	1.03	0.04
C01G5.3	C01G5.3	C01G5.3	3.11	3.57	0.73	-0.46
C01G5.4	C01G5.4	C01G5.4	3.42	2.2	2.32	1.22
C01G5.5	C01G5.5	C01G5.5	7.03	6.65	1.3	0.37
C01G5.6	C01G5.6	C01G5.6	9.24	8.37	1.83	0.87
C01G5.7	C01G5.7	C01G5.7	2.96	2.16	1.74	0.8
C01G5.8	C01G5.8	C01G5.8	7.01	6.36	1.57	0.65
C01G5.9	C01G5.9	C01G5.9	3.29	2.37	1.88	0.91
aqp-2	C01G6.1	C01G6.1a.1	10.58	8.6	3.96	1.98	1
aqp-2	C01G6.1	C01G6.1a.2	8.99	7.33	3.15	1.65
aqp-2	C01G6.1	C01G6.1b.1	8.21	6.99	2.32	1.22
aqp-2	C01G6.1	C01G6.1b.2	8.94	8.23	1.64	0.72
C01G6.2	C01G6.2	C01G6.2	3.99	2.18	3.51	1.81	1
C01G6.3	C01G6.3	C01G6.3	10.28	10.32	0.97	-0.04
C01G6.4	C01G6.4	C01G6.4	8.14	7.65	1.41	0.49
C01G6.5	C01G6.5	C01G6.5	9.64	8.58	2.08	1.06
tag-165	C01G6.6	C01G6.6a.1	8.76	7.96	1.74	0.8
tag-165	C01G6.6	C01G6.6a.2	8.88	8.24	1.55	0.63
tag-165	C01G6.6	C01G6.6a.3	8.88	8.24	1.55	0.63
tag-165	C01G6.6	C01G6.6b	8.84	8.21	1.54	0.63
C01G6.7	C01G6.7	C01G6.7	7.55	4.98	5.94	2.57	1
cam-1	C01G6.8	C01G6.8a	7.68	6.66	2.02	1.01
cam-1	C01G6.8	C01G6.8b	7.68	6.66	2.02	1.01
cam-1	C01G6.8	C01G6.8c	7.68	6.66	2.02	1.01
C01G6.9	C01G6.9	C01G6.9	4.8	3.17	3.1	1.63
C01G8.1	C01G8.1	C01G8.1	9.02	8.38	1.55	0.64
cln-3.2	C01G8.2	C01G8.2.1	5.69	4.99	1.62	0.7
cln-3.2	C01G8.2	C01G8.2.2	5.82	5.06	1.69	0.76
dhs-1	C01G8.3	C01G8.3	8.13	7.32	1.76	0.82
dnj-4	C01G8.4	C01G8.4	5.7	4.62	2.11	1.08
erm-1	C01G8.5	C01G8.5a.1	9.69	8.49	2.31	1.21
erm-1	C01G8.5	C01G8.5a.2	9.69	8.49	2.31	1.21
erm-1	C01G8.5	C01G8.5b	9.5	8.11	2.63	1.4
C01G8.6	C01G8.6	C01G8.6	7.23	6.7	1.44	0.52
lss-4	C01G8.9	C01G8.9a	9.53	8.52	2.02	1.02
lss-4	C01G8.9	C01G8.9b	9.94	9	1.92	0.94
col-61	C01H6.1	C01H6.1	3.49	1.8	3.23	1.69
C01H6.2	C01H6.2	C01H6.2	3.99	2.31	3.22	1.69
C01H6.3	C01H6.3	C01H6.3	5.49	4.14	2.56	1.35
C01H6.4	C01H6.4	C01H6.4	4.48	3.44	2.06	1.04
nhr-23	C01H6.5	C01H6.5a	8.02	6.42	3.03	1.6
nhr-23	C01H6.5	C01H6.5b.1	8.04	6.37	3.18	1.67
nhr-23	C01H6.5	C01H6.5b.2	8.51	6.99	2.86	1.51
nhr-23	C01H6.5	C01H6.5b.3	8.42	6.84	2.99	1.58
nhr-23	C01H6.5	C01H6.5c	8.2	6.58	3.08	1.62
nhr-23	C01H6.5	C01H6.5d	8.14	6.83	2.48	1.31
nhr-23	C01H6.5	C01H6.5e.1	8.42	6.84	2.99	1.58
nhr-23	C01H6.5	C01H6.5e.2	8.6	7.07	2.88	1.53
nhr-23	C01H6.5	C01H6.5f.1	8.5	6.98	2.86	1.52
nhr-23	C01H6.5	C01H6.5f.2	8.5	6.98	2.86	1.52
C01H6.6	C01H6.6	C01H6.6	5.7	5.14	1.48	0.56
tag-298	C01H6.7	C01H6.7	7.94	7.41	1.45	0.54
C01H6.8	C01H6.8	C01H6.8	4.41	2.23	4.54	2.18	1
C01H6.9	C01H6.9	C01H6.9	6.41	5.48	1.91	0.93
gst-33	C02A12.1	C02A12.1	3.74	2.38	2.57	1.36
srbc-33	C02A12.10	C02A12.10	2.59	1.77	1.77	0.82
srbc-29	C02A12.2	C02A12.2	3.09	1.84	2.37	1.24
srbc-30	C02A12.3	C02A12.3	2.69	1.43	2.38	1.25
lys-7	C02A12.4	C02A12.4.1	8.81	9.63	0.57	-0.81
lys-7	C02A12.4	C02A12.4.2	9.17	9.9	0.61	-0.72
srbc-32	C02A12.5	C02A12.5	3.58	1.77	3.5	1.81	1
srbc-36	C02A12.6	C02A12.6	3.89	2.1	3.44	1.78	1
C02A12.8	C02A12.8	C02A12.8	2.74	1.95	1.73	0.79
srbc-31	C02A12.9	C02A12.9	2.18	2.12	1.04	0.06
C02B10.1	C02B10.1	C02B10.1	9.75	8.84	1.87	0.9
C02B10.2	C02B10.2	C02B10.2	7.94	7.47	1.39	0.47
C02B10.3	C02B10.3	C02B10.3.1	7.3	5.83	2.77	1.47
C02B10.3	C02B10.3	C02B10.3.2	7.9	6.8	2.15	1.11
C02B10.4	C02B10.4	C02B10.4.1	9.1	8.53	1.48	0.57
C02B10.4	C02B10.4	C02B10.4.2	9.64	9.19	1.37	0.45
C02B10.5	C02B10.5	C02B10.5.1	8.92	8.17	1.68	0.75
C02B10.5	C02B10.5	C02B10.5.2	8.58	7.82	1.69	0.76
C02B10.5	C02B10.5	C02B10.5.3	8.55	7.8	1.69	0.75
C02B10.6	C02B10.6	C02B10.6	4.52	2.79	3.3	1.72
adt-1	C02B4.1	C02B4.1	6.12	2.89	9.38	3.23	1
nhr-17	C02B4.2	C02B4.2	6.75	5.6	2.22	1.15
C02B4.3	C02B4.3	C02B4.3	3.52	1.68	3.6	1.85	1
C02B8.1	C02B8.1	C02B8.1.1	4.35	5.31	0.51	-0.96		1
C02B8.1	C02B8.1	C02B8.1.2	4.72	5.53	0.57	-0.81
C02B8.2	C02B8.2	C02B8.2	4.28	2.6	3.22	1.69
C02B8.3	C02B8.3	C02B8.3	5.24	4.64	1.52	0.6
hlh-8	C02B8.4	C02B8.4	4.73	4.53	1.14	0.2
C02B8.5	C02B8.5	C02B8.5	4.01	2.15	3.63	1.86	1
C02B8.6	C02B8.6	C02B8.6	5.54	3.89	3.13	1.65
C02B8.7	C02B8.7	C02B8.7	4.31	3.53	1.71	0.78
tyr-1	C02C2.1	C02C2.1.1	6.57	5.76	1.75	0.81
tyr-1	C02C2.1	C02C2.1.2	6.52	5.78	1.67	0.74
cup-4	C02C2.3	C02C2.3	5.17	4.09	2.11	1.08
C02C2.4	C02C2.4	C02C2.4	3.85	2.83	2.03	1.02
C02C2.5	C02C2.5	C02C2.5	4.46	3.67	1.73	0.79
dyn-1	C02C6.1	C02C6.1a	9.25	8.14	2.16	1.11
dyn-1	C02C6.1	C02C6.1b	9.63	8.62	2	1
C02C6.2	C02C6.2	C02C6.2a	7.06	4.94	4.34	2.12	1
C02C6.2	C02C6.2	C02C6.2b	7.47	5.63	3.58	1.84	1
C02C6.3	C02C6.3	C02C6.3a	7.03	5.71	2.5	1.32
C02C6.3	C02C6.3	C02C6.3b	7.68	5.95	3.32	1.73
C02D4.1	C02D4.1	C02D4.1	3.2	2.2	2.01	1
ser-2	C02D4.2	C02D4.2a	4.61	2.93	3.22	1.69
ser-2	C02D4.2	C02D4.2b	4.7	2.99	3.27	1.71
ser-2	C02D4.2	C02D4.2c	4.01	2.75	2.39	1.26
ser-2	C02D4.2	C02D4.2d	3.95	2.24	3.26	1.7
ser-2	C02D4.2	C02D4.2e	4.65	2.93	3.29	1.72
ser-2	C02D4.2	C02D4.2f	4.46	2.78	3.21	1.68
C02D5.1	C02D5.1	C02D5.1	7	2.88	17.38	4.12	1
C02D5.2	C02D5.2	C02D5.2a	6.08	4.02	4.17	2.06	1
C02D5.2	C02D5.2	C02D5.2b	6.35	4.21	4.41	2.14	1
C02D5.3	C02D5.3	C02D5.3a	5.37	4.38	2	1
C02D5.3	C02D5.3	C02D5.3b	7.91	6.04	3.66	1.87	1
C02D5.3	C02D5.3	C02D5.3c	3.28	2.66	1.54	0.62
C02E11.1	C02E11.1	C02E11.1a.1	8.82	7.85	1.96	0.97
C02E11.1	C02E11.1	C02E11.1a.2	9.12	8.16	1.95	0.96
C02E11.1	C02E11.1	C02E11.1b	9.12	8.16	1.95	0.96
C02E7.1	C02E7.1	C02E7.1	3.05	2.75	1.23	0.3
C02E7.10	C02E7.10	C02E7.10	2.73	1.74	1.98	0.99
str-211	C02E7.13	C02E7.13	3.68	1.53	4.46	2.16	1
srh-21	C02E7.2	C02E7.2	3.5	1.8	3.25	1.7
srh-20	C02E7.3	C02E7.3	2.05	1.93	1.09	0.12
srh-22	C02E7.4	C02E7.4	2.02	1.98	1.03	0.04
srh-23	C02E7.5	C02E7.5	3.3	2.09	2.32	1.21
C02E7.6	C02E7.6	C02E7.6	10.36	7.35	8.04	3.01	1
C02E7.7	C02E7.7	C02E7.7	8.3	4.13	17.99	4.17	1
C02E7.8	C02E7.8	C02E7.8	1	1.87	0.55	-0.87		1
str-205	C02E7.9	C02E7.9	3.19	2.3	1.85	0.89
tsp-17	C02F12.1	C02F12.1	3.48	3.4	1.05	0.08
C02F12.3	C02F12.3	C02F12.3.1	7.42	5.13	4.89	2.29	1
C02F12.3	C02F12.3	C02F12.3.2	7.39	5.16	4.71	2.24	1
tag-52	C02F12.4	C02F12.4	6.65	6.18	1.39	0.47
C02F12.5	C02F12.5	C02F12.5	5.63	5.59	1.03	0.04
tag-278	C02F12.7	C02F12.7	7.36	4.96	5.25	2.39	1
C02F12.8	C02F12.8	C02F12.8	5.74	4.75	1.98	0.99
C02F12.9	C02F12.9	C02F12.9	3.5	2.96	1.45	0.54
ced-5	C02F4.1	C02F4.1	7.37	6.38	1.99	0.99
tax-6	C02F4.2	C02F4.2a	9.03	7.64	2.63	1.39
tax-6	C02F4.2	C02F4.2b	8.71	7.3	2.66	1.41
tax-6	C02F4.2	C02F4.2c	8.77	7.18	3.03	1.6
C02F4.3	C02F4.3	C02F4.3	3.49	4.35	0.55	-0.86		1
C02F4.4	C02F4.4	C02F4.4	7.68	4.1	12.03	3.59	1
C02F4.5	C02F4.5	C02F4.5	3.82	1.84	3.95	1.98	1
knl-1	C02F5.1	C02F5.1	9.01	8.45	1.47	0.56
C02F5.10	C02F5.10	C02F5.10	4.49	2.98	2.85	1.51
tsp-2	C02F5.11	C02F5.11	7.74	3.71	16.34	4.03	1
C02F5.12	C02F5.12	C02F5.12	6.58	4.42	4.49	2.17	1
C02F5.13	C02F5.13	C02F5.13	7.67	7.45	1.17	0.23
C02F5.14	C02F5.14	C02F5.14	5.26	2.41	7.22	2.85	1
C02F5.2	C02F5.2	C02F5.2	2.54	1.37	2.25	1.17
C02F5.3	C02F5.3	C02F5.3	8.57	8.06	1.42	0.51
C02F5.4	C02F5.4	C02F5.4	8.96	8.51	1.37	0.45
C02F5.5	C02F5.5	C02F5.5	6.34	2.45	14.83	3.89	1
C02F5.6	C02F5.6	C02F5.6a	7.71	6.83	1.84	0.88
C02F5.6	C02F5.6	C02F5.6b	6.53	5.54	2	1
C02F5.7	C02F5.7	C02F5.7a.1	8.38	7.09	2.44	1.29
C02F5.7	C02F5.7	C02F5.7a.2	8.51	7.26	2.37	1.24
C02F5.7	C02F5.7	C02F5.7a.3	8.75	7.68	2.1	1.07
C02F5.7	C02F5.7	C02F5.7a.4	8.75	7.68	2.1	1.07
C02F5.7	C02F5.7	C02F5.7b.1	8.43	7.35	2.11	1.08
C02F5.7	C02F5.7	C02F5.7b.2	8.68	7.58	2.14	1.1
tsp-1	C02F5.8	C02F5.8	8.34	4.65	12.98	3.7	1
pbs-6	C02F5.9	C02F5.9.1	10.28	9.01	2.41	1.27
pbs-6	C02F5.9	C02F5.9.2	10.87	9.72	2.22	1.15
C02G6.1	C02G6.1	C02G6.1	4.43	3.4	2.04	1.03
C02G6.2	C02G6.2	C02G6.2	3.61	2.46	2.21	1.14
C02G6.3	C02G6.3	C02G6.3	5.32	3.14	4.53	2.18	1
C02H6.1	C02H6.1	C02H6.1	3.13	1.98	2.22	1.15
fbxa-105	C02H6.2	C02H6.2	6.66	3.03	12.37	3.63	1
C02H7.1	C02H7.1	C02H7.1	4.19	2.14	4.16	2.06	1
C02H7.2	C02H7.2	C02H7.2	3.51	1.92	3.02	1.6
aex-3	C02H7.3	C02H7.3a	5.75	4.37	2.6	1.38
aex-3	C02H7.3	C02H7.3b	5.88	4.29	3.01	1.59
C03A3.1	C03A3.1	C03A3.1a	6.16	3.48	6.4	2.68	1
C03A3.1	C03A3.1	C03A3.1b	6.52	3.65	7.34	2.88	1
C03A3.2	C03A3.2	C03A3.2.1	7.9	7.53	1.29	0.37
C03A3.2	C03A3.2	C03A3.2.2	7.92	7.54	1.3	0.38
C03A3.3	C03A3.3	C03A3.3	3.63	1.95	3.21	1.68
C03A7.1	C03A7.1	C03A7.1	4.52	4.19	1.26	0.33
srt-65	C03A7.10	C03A7.10	2.57	1.23	2.53	1.34
ugt-51	C03A7.11	C03A7.11	3.82	3.84	0.98	-0.03
C03A7.12	C03A7.12	C03A7.12	3.65	4.42	0.58	-0.77
C03A7.13	C03A7.13	C03A7.13	4.76	4.22	1.46	0.54
abu-8	C03A7.14	C03A7.14	6.62	3.62	8.02	3	1
C03A7.2	C03A7.2	C03A7.2	4.41	5.13	0.61	-0.71
srw-140	C03A7.3	C03A7.3	1.66	1.6	1.04	0.06
pqn-5	C03A7.4	C03A7.4	6.93	4.34	6.02	2.59	1
srx-38	C03A7.5	C03A7.5	1.94	1.12	1.76	0.81
srx-39	C03A7.6	C03A7.6	3.29	2.33	1.95	0.96
abu-6	C03A7.7	C03A7.7	6.46	2.8	12.61	3.66	1
abu-7	C03A7.8	C03A7.8	7.39	4.43	7.75	2.95	1
srt-64	C03A7.9	C03A7.9	1.79	1.5	1.22	0.29
C03B1.1	C03B1.1	C03B1.1	2.66	1.35	2.49	1.32
C03B1.10	C03B1.10	C03B1.10	1.63	1	1.54	0.63
lmp-1	C03B1.12	C03B1.12.1	9.65	9.13	1.43	0.52
lmp-1	C03B1.12	C03B1.12.2	10.07	9.61	1.37	0.46
C03B1.13	C03B1.13	C03B1.13	4.19	4.28	0.94	-0.09
C03B1.14	C03B1.14	C03B1.14	5.31	3.88	2.7	1.43
C03B1.15	C03B1.15	C03B1.15	2.21	2.57	0.78	-0.36
C03B1.2	C03B1.2	C03B1.2	3.68	2.86	1.76	0.81
C03B1.3	C03B1.3	C03B1.3	2.72	1.01	3.26	1.71
C03B1.4	C03B1.4	C03B1.4	3.01	2.1	1.88	0.91
C03B1.5	C03B1.5	C03B1.5	2.45	2.35	1.07	0.09
C03B1.6	C03B1.6	C03B1.6	3.03	2.34	1.62	0.69
C03B1.7	C03B1.7	C03B1.7	4.7	4.31	1.31	0.39
C03B1.9	C03B1.9	C03B1.9	2.69	2.19	1.42	0.5
C03B8.1	C03B8.1	C03B8.1	2.73	3.73	0.5	-1		1
C03B8.2	C03B8.2	C03B8.2	5.56	4.75	1.76	0.81
C03B8.3	C03B8.3	C03B8.3	3.63	3.27	1.29	0.37
lin-13	C03B8.4	C03B8.4	8.82	7.88	1.92	0.94
kin-19	C03C10.1	C03C10.1.1	10.1	9.26	1.79	0.84
kin-19	C03C10.1	C03C10.1.2	10.08	9.24	1.78	0.84
kin-19	C03C10.1	C03C10.1.3	10.38	9.57	1.76	0.82
C03C10.2	C03C10.2	C03C10.2	3.37	2.05	2.48	1.31
rnr-2	C03C10.3	C03C10.3.1	10.32	10.04	1.22	0.29
rnr-2	C03C10.3	C03C10.3.2	8.5	8.35	1.11	0.15
rnr-2	C03C10.3	C03C10.3.3	10.68	10.43	1.19	0.25
C03C10.4	C03C10.4	C03C10.4	8.64	7.83	1.75	0.81
C03C10.5	C03C10.5	C03C10.5	4.32	2.1	4.67	2.22	1
C03C10.6	C03C10.6	C03C10.6	6.48	3.98	5.67	2.5	1
C03C10.7	C03C10.7	C03C10.7	3.18	3.42	0.85	-0.24
C03C11.1	C03C11.1	C03C11.1	4.35	3.66	1.62	0.69
fog-3	C03C11.2	C03C11.2	3.09	1.97	2.18	1.13
C03D6.1	C03D6.1	C03D6.1	5.85	2.85	8.04	3.01	1
cel-1	C03D6.3	C03D6.3a	7.68	6.57	2.16	1.11
cel-1	C03D6.3	C03D6.3b	8.15	7.22	1.9	0.93
npp-14	C03D6.4	C03D6.4	8.81	7.77	2.05	1.03
C03D6.5	C03D6.5	C03D6.5	7.66	7.2	1.38	0.47
C03D6.6	C03D6.6	C03D6.6	7.48	7.01	1.38	0.46
rpl-24.2	C03D6.8	C03D6.8.1	9.62	8.31	2.48	1.31
rpl-24.2	C03D6.8	C03D6.8.2	9.62	8.31	2.48	1.31
C03E10.1	C03E10.1	C03E10.1	2.23	1.64	1.51	0.59
C03E10.3	C03E10.3	C03E10.3	3.77	2.11	3.18	1.67
gly-20	C03E10.4	C03E10.4	8.94	8.56	1.3	0.38
C03E10.5	C03E10.5	C03E10.5	6.25	6.68	0.74	-0.43
C03E10.6	C03E10.6	C03E10.6	7.07	7.77	0.62	-0.7
C03F11.1	C03F11.1	C03F11.1	4.58	2.2	5.2	2.38	1
C03F11.2	C03F11.2	C03F11.2	3.29	2.33	1.94	0.96
C03F11.3	C03F11.3	C03F11.3	7.71	5.86	3.61	1.85	1
C03F11.4	C03F11.4	C03F11.4.1	4.23	2.14	4.26	2.09	1
C03F11.4	C03F11.4	C03F11.4.2	4.52	2.23	4.88	2.29	1
C03F11.4	C03F11.4	C03F11.4.3	4.52	2.23	4.88	2.29	1
sdha-1	C03G5.1	C03G5.1.1	7.72	6.56	2.23	1.16
sdha-1	C03G5.1	C03G5.1.2	8.82	7.5	2.5	1.32
nspc-3	C03G5.10	C03G5.10	9.93	9.49	1.35	0.44
nspc-4	C03G5.11	C03G5.11	5.02	4.94	1.05	0.08
nspc-5	C03G5.12	C03G5.12	9.77	9.63	1.1	0.14
nspc-6	C03G5.13	C03G5.13	7.44	5.37	4.21	2.07	1
nspc-7	C03G5.2	C03G5.2	8.77	8.52	1.19	0.25
flp-5	C03G5.7	C03G5.7	8.41	5.5	7.5	2.91	1
nspc-1	C03G5.8	C03G5.8	6.89	5.84	2.08	1.05
nspc-2	C03G5.9	C03G5.9	9.02	10.34	0.4	-1.33		1
nhr-148	C03G6.10	C03G6.10	2.97	2.32	1.58	0.66
srh-231	C03G6.11	C03G6.11	2.87	1.99	1.84	0.88
nhr-149	C03G6.12	C03G6.12	3.31	1.38	3.81	1.93	1
tag-293	C03G6.13	C03G6.13	3.53	2.21	2.51	1.33
cyp-35A1	C03G6.14	C03G6.14	5.12	1.77	10.21	3.35	1
cyp-35A2	C03G6.15	C03G6.15	5.11	5.57	0.73	-0.46
srsx-24	C03G6.16	C03G6.16	2.26	1.57	1.61	0.69
C03G6.17	C03G6.17	C03G6.17	3.8	3.19	1.52	0.61
srp-5	C03G6.18	C03G6.18	6.67	6.15	1.43	0.52
srp-6	C03G6.19	C03G6.19	7.4	6.67	1.65	0.72
srx-56	C03G6.2	C03G6.2	3.89	1.39	5.68	2.51	1
srj-14	C03G6.3	C03G6.3	4.02	2.28	3.33	1.74
C03G6.5	C03G6.5	C03G6.5	6.76	6.88	0.92	-0.12
C03G6.6	C03G6.6	C03G6.6	1.88	2.15	0.83	-0.28
srh-275	C03G6.7	C03G6.7	2.91	1.42	2.81	1.49
nhr-147	C03G6.8	C03G6.8	4.02	2.34	3.19	1.67
srh-244	C03G6.9	C03G6.9	3.68	2	3.21	1.68
C03H12.1	C03H12.1	C03H12.1	6.62	5.56	2.08	1.06
clec-10	C03H5.1	C03H5.1	5.06	4.85	1.16	0.22
C03H5.2	C03H5.2	C03H5.2	8.82	8.16	1.59	0.67
C03H5.3	C03H5.3	C03H5.3	8.42	7.55	1.82	0.87
C03H5.4	C03H5.4	C03H5.4	1.73	1.94	0.86	-0.21
C03H5.5	C03H5.5	C03H5.5	4.32	3.46	1.81	0.86
C03H5.6	C03H5.6	C03H5.6	4.31	3.1	2.31	1.21
C03H5.7	C03H5.7	C03H5.7	3.42	2.03	2.63	1.4
C04A11.1	C04A11.1	C04A11.1	4.59	2.94	3.15	1.66
C04A11.2	C04A11.2	C04A11.2	4.29	4.35	0.96	-0.06
gck-4	C04A11.3	C04A11.3	8.74	7.56	2.26	1.18
adm-2	C04A11.4	C04A11.4	7.4	5.53	3.65	1.87	1
C04A11.5	C04A11.5	C04A11.5	5.33	2.87	5.5	2.46	1
C04A2.1	C04A2.1	C04A2.1.1	4.94	3.99	1.93	0.95
C04A2.1	C04A2.1	C04A2.1.2	5.03	4.04	1.98	0.99
egl-27	C04A2.3	C04A2.3a	8.45	7.27	2.26	1.17
egl-27	C04A2.3	C04A2.3b	8.61	7.47	2.2	1.14
egl-27	C04A2.3	C04A2.3c.1	10.39	9.75	1.56	0.64
egl-27	C04A2.3	C04A2.3c.2	10.65	10.03	1.53	0.62
egl-27	C04A2.3	C04A2.3c.3	10.65	10.03	1.53	0.62
dnj-5	C04A2.7	C04A2.7a	9.3	8.52	1.72	0.79
dnj-5	C04A2.7	C04A2.7b.1	9.13	8.43	1.63	0.7
dnj-5	C04A2.7	C04A2.7b.2	9.04	8.35	1.61	0.69
dnj-5	C04A2.7	C04A2.7c	9.3	8.52	1.72	0.79
dnj-5	C04A2.7	C04A2.7d	9.34	8.57	1.7	0.77
C04B4.1	C04B4.1	C04B4.1	2.54	1.6	1.91	0.93
C04B4.2	C04B4.2	C04B4.2	8	7.72	1.22	0.29
C04B4.3	C04B4.3	C04B4.3	2.97	2.01	1.95	0.96
C04B4.4	C04B4.4	C04B4.4	2.76	1.56	2.3	1.2
C04B4.5	C04B4.5	C04B4.5	2.48	1.96	1.44	0.53
C04B4.6	C04B4.6	C04B4.6	2.79	1.11	3.2	1.68
C04C11.1	C04C11.1	C04C11.1b	7.08	6.42	1.58	0.66
C04C11.2	C04C11.2	C04C11.2.1	8.56	7.45	2.16	1.11
C04C11.2	C04C11.2	C04C11.2.2	8.83	7.74	2.12	1.08
srz-60	C04C3.1	C04C3.1	3.09	2.45	1.56	0.64
C04C3.2	C04C3.2	C04C3.2	3.6	2.34	2.41	1.27
C04C3.3	C04C3.3	C04C3.3.1	9.76	9.21	1.47	0.55
C04C3.3	C04C3.3	C04C3.3.2	9.79	9.21	1.49	0.57
C04C3.4	C04C3.4	C04C3.4	7.27	5.49	3.44	1.78	1
dyf-3	C04C3.5	C04C3.5a	4.27	2.87	2.64	1.4
dyf-3	C04C3.5	C04C3.5b	4.11	2.48	3.1	1.63
dyf-3	C04C3.5	C04C3.5c	3.93	2.78	2.21	1.15
C04C3.6	C04C3.6	C04C3.6	2.32	2.78	0.73	-0.46
C04C3.7	C04C3.7	C04C3.7	2.79	2.32	1.38	0.47
C04D8.1	C04D8.1	C04D8.1	8.75	7.64	2.17	1.12
C04E12.10	C04E12.10	C04E12.10	2.55	1.76	1.73	0.79
C04E12.11	C04E12.11	C04E12.11	5.78	4.05	3.32	1.73
C04E12.12	C04E12.12	C04E12.12	4.73	3.74	1.99	0.99
C04E12.2	C04E12.2	C04E12.2.1	4.03	4.27	0.85	-0.23
C04E12.2	C04E12.2	C04E12.2.2	4.46	5.06	0.66	-0.6
C04E12.4	C04E12.4	C04E12.4	4.43	3.65	1.71	0.78
C04E12.5	C04E12.5	C04E12.5	2.84	2.08	1.69	0.75
C04E12.6	C04E12.6	C04E12.6	3.69	3.42	1.2	0.26
plsc-1	C04E12.7	C04E12.7	3.45	2.53	1.88	0.91
srx-121	C04E12.8	C04E12.8	3.61	2.17	2.72	1.44
srbc-2	C04E12.9	C04E12.9	2.37	2.29	1.06	0.08
srd-15	C04E6.10	C04E6.10	2.5	2.19	1.24	0.31
C04E6.11	C04E6.11	C04E6.11	7.06	6.51	1.47	0.55
C04E6.12	C04E6.12	C04E6.12	4.24	1.66	5.98	2.58	1
C04E6.13	C04E6.13	C04E6.13	5.55	3.67	3.68	1.88	1
srsx-18	C04E6.2	C04E6.2	2.83	2.2	1.55	0.64
C04E6.3	C04E6.3	C04E6.3	2.14	2.05	1.06	0.08
C04E6.4	C04E6.4	C04E6.4	2.35	1.48	1.83	0.88
C04E6.5	C04E6.5	C04E6.5	3.37	1.72	3.12	1.64
grd-9	C04E6.6	C04E6.6	2.89	1.88	2.01	1.01
C04E6.7	C04E6.7	C04E6.7	4.38	4.12	1.2	0.26
C04E6.8	C04E6.8	C04E6.8	3.35	2.41	1.92	0.94
srd-16	C04E6.9	C04E6.9	2.54	1.43	2.16	1.11
C04E7.1	C04E7.1	C04E7.1	3.43	3.24	1.14	0.19
C04E7.2	C04E7.2	C04E7.2	6.97	6.05	1.89	0.92
C04E7.3	C04E7.3	C04E7.3	7.33	6.13	2.3	1.2
C04E7.4	C04E7.4	C04E7.4	4.64	3.18	2.75	1.46
C04F1.1	C04F1.1	C04F1.1	3.55	2.68	1.82	0.86
lim-7	C04F1.3	C04F1.3	5.94	4.8	2.21	1.15
C04F12.1	C04F12.1	C04F12.1	7.06	5.86	2.29	1.2
fce-1	C04F12.10	C04F12.10	8	7.2	1.74	0.8
ikb-1	C04F12.3	C04F12.3	6.89	4.96	3.81	1.93	1
rpl-14	C04F12.4	C04F12.4.1	11.42	10.79	1.54	0.62
rpl-14	C04F12.4	C04F12.4.2	11.42	10.79	1.54	0.62
C04F12.5	C04F12.5	C04F12.5	6.91	6.55	1.28	0.36
C04F12.6	C04F12.6	C04F12.6	4.48	2.67	3.52	1.82	1
C04F12.7	C04F12.7	C04F12.7	4.57	3.74	1.78	0.83
C04F12.8	C04F12.8	C04F12.8	6.02	4.5	2.86	1.51
rnh-1.3	C04F12.9	C04F12.9	3.81	4.64	0.56	-0.83		1
srh-79	C04F2.1	C04F2.1	3.04	1.72	2.49	1.32
srh-229	C04F2.4	C04F2.4	3.21	1.65	2.95	1.56
sid-1	C04F5.1	C04F5.1	7.03	6.87	1.12	0.16
C04F5.2	C04F5.2	C04F5.2	4	2.73	2.4	1.26
unc-46	C04F5.3	C04F5.3	4.06	2.84	2.33	1.22
srab-1	C04F5.4	C04F5.4	3.64	2.26	2.61	1.38
srab-2	C04F5.5	C04F5.5	2.4	1.55	1.81	0.85
srab-3	C04F5.6	C04F5.6	1.4	1.65	0.84	-0.26
ugt-63	C04F5.7	C04F5.7	3.23	3.26	0.98	-0.04
C04F5.8	C04F5.8	C04F5.8	8.44	7.84	1.51	0.6
C04F5.9	C04F5.9	C04F5.9	6.66	6.06	1.51	0.6
vit-5	C04F6.1	C04F6.1.1	13.2	13.56	0.78	-0.36
vit-5	C04F6.1	C04F6.1.2	13.3	13.71	0.75	-0.41
vit-5	C04F6.1	C04F6.1.3	13.3	13.71	0.75	-0.41
C04F6.2	C04F6.2	C04F6.2	4.17	3.85	1.25	0.32
cht-1	C04F6.3	C04F6.3.1	7.6	7.36	1.18	0.24
cht-1	C04F6.3	C04F6.3.2	8.09	7.88	1.16	0.21
unc-78	C04F6.4	C04F6.4a	8.22	6.49	3.31	1.73
unc-78	C04F6.4	C04F6.4b.1	7.96	6.49	2.77	1.47
unc-78	C04F6.4	C04F6.4b.2	8.07	6.28	3.46	1.79	1
dhs-27	C04F6.5	C04F6.5	4.49	3.78	1.64	0.72
C04G2.1	C04G2.1	C04G2.1	5.05	4.38	1.6	0.67
C04G2.10	C04G2.10	C04G2.10	5.67	5.55	1.09	0.12
C04G2.11	C04G2.11	C04G2.11	2.67	1.36	2.48	1.31
C04G2.2	C04G2.2	C04G2.2	3.03	2.12	1.87	0.9
msp-36	C04G2.4	C04G2.4	8.2	7.31	1.85	0.89
C04G2.5	C04G2.5	C04G2.5	2.1	1.36	1.67	0.74
dis-3	C04G2.6	C04G2.6	7.95	7.23	1.65	0.73
egl-38	C04G2.7	C04G2.7	5.17	2.98	4.58	2.19	1
C04G2.8	C04G2.8	C04G2.8	2.73	3.68	0.52	-0.95		1
C04G2.9	C04G2.9	C04G2.9	4.07	3.47	1.52	0.6
C04G6.10	C04G6.10	C04G6.10	6.02	1.41	24.39	4.61	1
C04G6.11	C04G6.11	C04G6.11	2.09	1.72	1.3	0.37
mpk-2	C04G6.1	C04G6.1a	5.59	3.53	4.2	2.07	1
mpk-2	C04G6.1	C04G6.1b	6.08	3.53	5.84	2.55	1
mpk-2	C04G6.1	C04G6.1c.1	5.73	3.53	4.57	2.19	1
mpk-2	C04G6.1	C04G6.1c.2	5.8	3.83	3.93	1.97	1
C04G6.2	C04G6.2	C04G6.2	3.98	2.18	3.48	1.8	1
pld-1	C04G6.3	C04G6.3.1	7.78	6.57	2.31	1.21
pld-1	C04G6.3	C04G6.3.2	7.81	6.59	2.33	1.22
C04G6.4	C04G6.4	C04G6.4	7.7	6.17	2.88	1.53
C04G6.5	C04G6.5	C04G6.5	6.66	4.81	3.61	1.85	1
C04G6.6	C04G6.6	C04G6.6	6.37	2.63	13.4	3.74	1
C04G6.7	C04G6.7	C04G6.7	3.48	2.16	2.49	1.32
C04H4.1	C04H4.1	C04H4.1	3.66	3.11	1.46	0.55
C04H5.1	C04H5.1	C04H5.1	8.35	7.44	1.88	0.91
C04H5.2	C04H5.2	C04H5.2	7.06	5.85	2.31	1.21
gcy-29	C04H5.3	C04H5.3	3.62	1.79	3.55	1.83	1
mog-4	C04H5.6	C04H5.6	7.17	6.39	1.72	0.78
C04H5.7	C04H5.7	C04H5.7	5.44	6.99	0.34	-1.55		1
nlp-41	C04H5.8	C04H5.8	4.34	2.99	2.54	1.35
pph-1	C05A2.1	C05A2.1	7.53	6.21	2.49	1.32
pgp-5	C05A9.1	C05A9.1	6.31	4.1	4.66	2.22	1
C05A9.2	C05A9.2	C05A9.2	6.95	5.39	2.95	1.56
C05A9.3	C05A9.3	C05A9.3	2.94	2.23	1.64	0.71
lip-1	C05B10.1	C05B10.1	8.6	7.49	2.16	1.11
C05B5.1	C05B5.1	C05B5.1	3.25	2.05	2.29	1.19
C05B5.2	C05B5.2	C05B5.2	3.62	2.25	2.58	1.37
pqn-8	C05B5.3	C05B5.3	4.69	1.7	7.93	2.99	1
C05B5.4	C05B5.4	C05B5.4	6.8	5.48	2.51	1.32
C05B5.5	C05B5.5	C05B5.5	2.99	1.83	2.23	1.16
C05B5.6	C05B5.6	C05B5.6	3.21	1.71	2.84	1.51
rgs-1	C05B5.7	C05B5.7	3.71	2.17	2.9	1.54
C05B5.8	C05B5.8	C05B5.8	5.9	5.26	1.55	0.63
C05B5.9	C05B5.9	C05B5.9	5.54	3.23	4.95	2.31	1
C05C10.1	C05C10.1	C05C10.1	2.65	1.71	1.92	0.94
C05C10.2	C05C10.2	C05C10.2a	6.66	6.36	1.23	0.3
C05C10.2	C05C10.2	C05C10.2b.1	6.83	6.45	1.31	0.39
C05C10.2	C05C10.2	C05C10.2b.2	6.72	5.86	1.82	0.86
C05C10.3	C05C10.3	C05C10.3.1	7.73	7.65	1.06	0.08
C05C10.3	C05C10.3	C05C10.3.2	8.56	7.69	1.82	0.87
C05C10.3	C05C10.3	C05C10.3.3	9.22	7.94	2.44	1.29
C05C10.4	C05C10.4	C05C10.4	6.69	7.47	0.58	-0.79
C05C10.5	C05C10.5	C05C10.5a	9.74	9.47	1.2	0.27
C05C10.5	C05C10.5	C05C10.5b	10.13	10	1.09	0.13
C05C10.5	C05C10.5	C05C10.5c.1	10.13	10	1.09	0.13
C05C10.5	C05C10.5	C05C10.5c.2	10.13	10	1.09	0.13
C05C10.5	C05C10.5	C05C10.5c.3	10.53	10.53	1	0
ufd-3	C05C10.6	C05C10.6a	9.62	8.93	1.62	0.69
ufd-3	C05C10.6	C05C10.6b	9.79	8.99	1.74	0.8
C05C10.7	C05C10.7	C05C10.7	5.61	5.35	1.19	0.26
C05C12.1	C05C12.1	C05C12.1	3.74	3.01	1.66	0.73
gtl-1	C05C12.3	C05C12.3	6.14	5.67	1.39	0.48
C05C12.4	C05C12.4	C05C12.4	6.79	5.36	2.71	1.44
C05C12.5	C05C12.5	C05C12.5	2.53	1.3	2.34	1.23
C05C12.6	C05C12.6	C05C12.6	2.9	2.51	1.32	0.4
C05C8.1	C05C8.1	C05C8.1	7.82	6.91	1.87	0.9
C05C8.2	C05C8.2	C05C8.2	8.66	7.95	1.64	0.71
fkb-3	C05C8.3	C05C8.3	9.39	7.86	2.88	1.52
gei-6	C05C8.4	C05C8.4	8.11	6.99	2.18	1.12
C05C8.5	C05C8.5	C05C8.5	8.28	7.56	1.64	0.72
C05C8.6	C05C8.6	C05C8.6	8.91	8.55	1.28	0.35
C05C8.7	C05C8.7	C05C8.7.1	7.69	6.22	2.76	1.47
C05C8.7	C05C8.7	C05C8.7.2	8.31	6.94	2.59	1.37
C05C8.7	C05C8.7	C05C8.7.3	7.94	6.56	2.59	1.38
C05C8.7	C05C8.7	C05C8.7.4	8.15	6.76	2.61	1.39
C05C8.8	C05C8.8	C05C8.8	2.78	1.68	2.14	1.09
C05C8.9	C05C8.9	C05C8.9a	7.49	7.14	1.27	0.35
C05C8.9	C05C8.9	C05C8.9b.1	8.25	7.63	1.54	0.62
C05C8.9	C05C8.9	C05C8.9b.2	8.4	7.85	1.46	0.55
C05C9.1	C05C9.1	C05C9.1	4.11	2.44	3.19	1.67
C05C9.2	C05C9.2	C05C9.2	3.28	1.55	3.31	1.73
C05C9.3	C05C9.3	C05C9.3	3.57	2.26	2.49	1.31
C05D10.1	C05D10.1	C05D10.1a.1	8.98	7.67	2.49	1.31
C05D10.1	C05D10.1	C05D10.1a.2	9.28	8.02	2.4	1.26
C05D10.1	C05D10.1	C05D10.1b	9.34	8.1	2.36	1.24
C05D10.1	C05D10.1	C05D10.1c.1	9.69	8.57	2.18	1.12
C05D10.1	C05D10.1	C05D10.1c.2	9.35	8.15	2.3	1.2
C05D10.1	C05D10.1	C05D10.1c.3	9.28	8.02	2.4	1.26
C05D10.1	C05D10.1	C05D10.1c.4	9.69	8.57	2.18	1.12
C05D10.2	C05D10.2	C05D10.2a	4.45	3.31	2.2	1.14
C05D10.2	C05D10.2	C05D10.2b	3.51	3.42	1.07	0.1
C05D10.2	C05D10.2	C05D10.2c	4.45	3.31	2.2	1.14
C05D10.3	C05D10.3	C05D10.3	4.61	3.76	1.81	0.85
C05D10.4	C05D10.4	C05D10.4a	6.46	4.95	2.84	1.51
C05D10.4	C05D10.4	C05D10.4b	6.17	4.58	3.01	1.59
C05D10.4	C05D10.4	C05D10.4c	6.99	5.53	2.73	1.45
C05D11.1	C05D11.1	C05D11.1	9.37	8.82	1.46	0.55
C05D11.10	C05D11.10	C05D11.10	5.78	5.32	1.38	0.47
mel-32	C05D11.11	C05D11.11a.1	10.6	10.03	1.49	0.57
mel-32	C05D11.11	C05D11.11a.2	10.6	10.03	1.49	0.57
mel-32	C05D11.11	C05D11.11a.3	9.79	9.33	1.37	0.46
mel-32	C05D11.11	C05D11.11b.1	8.72	8	1.64	0.71
mel-32	C05D11.11	C05D11.11b.2	9.46	9.01	1.36	0.45
mel-32	C05D11.11	C05D11.11b.3	9.79	9.33	1.37	0.46
let-721	C05D11.12	C05D11.12.1	8.81	7.85	1.95	0.96
let-721	C05D11.12	C05D11.12.2	9.24	8.37	1.82	0.86
C05D11.13	C05D11.13	C05D11.13	6.83	5.35	2.78	1.47
vps-16	C05D11.2	C05D11.2.1	8.33	7.39	1.92	0.94
vps-16	C05D11.2	C05D11.2.2	8.58	7.55	2.04	1.03
tag-170	C05D11.3	C05D11.3	9.21	8.24	1.95	0.96
let-756	C05D11.4	C05D11.4	6.52	4.72	3.5	1.81	1
C05D11.5	C05D11.5	C05D11.5	4.37	3.7	1.59	0.67
nas-4	C05D11.6	C05D11.6	5.6	2.52	8.43	3.07	1
C05D11.7	C05D11.7	C05D11.7a.1	8.59	7.73	1.82	0.87
C05D11.7	C05D11.7	C05D11.7a.2	9.25	8.19	2.09	1.06
C05D11.7	C05D11.7	C05D11.7b	9.33	8.23	2.15	1.1
C05D11.8	C05D11.8	C05D11.8	7.53	6.86	1.59	0.67
C05D11.9	C05D11.9	C05D11.9	7.41	6.24	2.24	1.17
C05D12.1	C05D12.1	C05D12.1	4.91	2.89	4.04	2.01	1
C05D12.2	C05D12.2	C05D12.2	4.63	4.58	1.04	0.05
C05D12.3	C05D12.3	C05D12.3a.1	6.69	4.37	4.99	2.32	1
C05D12.3	C05D12.3	C05D12.3a.2	6.89	4.52	5.17	2.37	1
C05D12.3	C05D12.3	C05D12.3c	7	4.67	5.03	2.33	1
C05D12.4	C05D12.4	C05D12.4	6.35	4.55	3.48	1.8	1
C05D12.5	C05D12.5	C05D12.5	4.25	4.21	1.02	0.03
C05D12.7	C05D12.7	C05D12.7	6.53	5.34	2.29	1.19
C05D2.10	C05D2.10	C05D2.10a.1	9.42	8.81	1.53	0.61
C05D2.10	C05D2.10	C05D2.10a.2	9.59	9.02	1.49	0.57
C05D2.10	C05D2.10	C05D2.10b	9.59	9.01	1.49	0.57
daf-4	C05D2.1	C05D2.1a	7.01	6.63	1.3	0.38
daf-4	C05D2.1	C05D2.1c	6.88	6.46	1.34	0.42
daf-4	C05D2.1	C05D2.1d	6.83	6.75	1.05	0.07
C05D2.3	C05D2.3	C05D2.3	3.28	2.51	1.7	0.77
bas-1	C05D2.4	C05D2.4a	7.02	5.84	2.27	1.18
bas-1	C05D2.4	C05D2.4b	6.5	5.47	2.03	1.02
gak-1	C05D2.5	C05D2.5	8.93	8.43	1.42	0.5
C05D2.6	C05D2.6	C05D2.6a.1	6.5	6.29	1.16	0.21
C05D2.6	C05D2.6	C05D2.6a.2	6.62	6.39	1.17	0.23
C05D2.6	C05D2.6	C05D2.6b	6.98	6.67	1.24	0.31
C05D2.8	C05D2.8	C05D2.8	7.87	7.54	1.25	0.33
snx-1	C05D9.1	C05D9.1.1	9.25	8.52	1.66	0.73
snx-1	C05D9.1	C05D9.1.2	8.48	7.49	1.98	0.99
lmp-2	C05D9.2	C05D9.2.1	6.63	4.73	3.72	1.9	1
lmp-2	C05D9.2	C05D9.2.2	6.03	4.51	2.86	1.52
C05D9.3	C05D9.3	C05D9.3	6.65	5	3.16	1.66
C05D9.4	C05D9.4	C05D9.4	2.5	1.06	2.7	1.44
ife-4	C05D9.5	C05D9.5	6.66	6.72	0.96	-0.06
C05D9.7	C05D9.7	C05D9.7	6.51	4.57	3.84	1.94	1
C05D9.9	C05D9.9	C05D9.9a	6.17	3.86	4.94	2.31	1
C05D9.9	C05D9.9	C05D9.9b	6.68	4.73	3.87	1.95	1
C05E11.1	C05E11.1	C05E11.1	8.34	7.41	1.9	0.93
C05E11.2	C05E11.2	C05E11.2	2.94	2.53	1.32	0.4
C05E11.3	C05E11.3	C05E11.3	6.63	4.54	4.26	2.09	1
amt-1	C05E11.4	C05E11.4	3.41	3.12	1.22	0.29
amt-4	C05E11.5	C05E11.5	5.61	5.27	1.27	0.34
C05E11.6	C05E11.6	C05E11.6	5.06	5.5	0.73	-0.45
C05E11.7	C05E11.7	C05E11.7	3.66	2.24	2.67	1.42
flp-12	C05E11.8	C05E11.8	7.5	6.41	2.12	1.09
srp-2	C05E4.1	C05E4.1.1	6.16	5.55	1.53	0.61
srp-2	C05E4.1	C05E4.1.2	7.19	6.48	1.64	0.71
srj-25	C05E4.10	C05E4.10	2.59	1.87	1.64	0.71
srj-24	C05E4.11	C05E4.11	2.68	2	1.6	0.68
C05E4.12	C05E4.12	C05E4.12	3.47	2.18	2.45	1.29
str-262	C05E4.13	C05E4.13	2.08	2.85	0.59	-0.77
srh-2	C05E4.14	C05E4.14a	3.32	3.74	0.75	-0.41
srh-2	C05E4.14	C05E4.14b	4.21	4.95	0.6	-0.74
str-20	C05E4.2	C05E4.2	2.69	1.74	1.94	0.96
srp-1	C05E4.3	C05E4.3	5.87	6.72	0.56	-0.85		1
sri-4	C05E4.4	C05E4.4	3.45	1.56	3.69	1.88	1
str-134	C05E4.6	C05E4.6	4.71	1.51	9.15	3.19	1
C05E4.7	C05E4.7	C05E4.7	1.58	1	1.49	0.58
gei-7	C05E4.9	C05E4.9a.1	10.34	10.72	0.77	-0.37
gei-7	C05E4.9	C05E4.9a.2	9.47	9.46	1.01	0.01
gei-7	C05E4.9	C05E4.9a.3	10.21	10.71	0.71	-0.5
gei-7	C05E4.9	C05E4.9b.1	9.44	9.97	0.69	-0.53
gei-7	C05E4.9	C05E4.9b.2	9.18	9.64	0.73	-0.46
C05E7.1	C05E7.1	C05E7.1	5.72	2.68	8.25	3.04	1
C05E7.2	C05E7.2	C05E7.2	3.84	1.52	4.98	2.32	1
C05E7.3	C05E7.3	C05E7.3	4.9	1.92	7.89	2.98	1
C05E7.4	C05E7.4	C05E7.4	3.54	2.26	2.43	1.28
C05G5.1	C05G5.1	C05G5.1	5.93	3.81	4.36	2.12	1
C05G5.2	C05G5.2	C05G5.2	7.78	7.08	1.62	0.7
C05G5.3	C05G5.3	C05G5.3	4.87	3.09	3.45	1.79	1
C05G5.4	C05G5.4	C05G5.4	8.65	7.98	1.59	0.67
C05G5.5	C05G5.5	C05G5.5	4.91	4.04	1.83	0.87
nhr-76	C05G6.1	C05G6.1	5.92	6.23	0.81	-0.31
ckk-1	C05H8.1	C05H8.1a	5.83	3.83	3.98	1.99	1
ckk-1	C05H8.1	C05H8.1b	5.75	3.75	4.01	2	1
cdc-48.1	C06A1.1	C06A1.1.1	10.62	9.55	2.1	1.07
cdc-48.1	C06A1.1	C06A1.1.2	10.67	9.61	2.08	1.05
C06A1.2	C06A1.2	C06A1.2	5.11	3.46	3.13	1.65
C06A1.3	C06A1.3	C06A1.3	3.9	3.55	1.28	0.35
C06A1.5	C06A1.5	C06A1.5	9.93	9.63	1.24	0.3
C06A1.6	C06A1.6	C06A1.6	4.43	2.63	3.47	1.79	1
C06A1.7	C06A1.7	C06A1.7	2.75	2.55	1.15	0.2
C06A12.3	C06A12.3	C06A12.3	6.07	5.98	1.06	0.09
gcy-27	C06A12.4	C06A12.4	2.41	1.85	1.47	0.55
C06A12.5	C06A12.5	C06A12.5	3.76	2.11	3.13	1.64
C06A12.8	C06A12.8	C06A12.8	2.61	2.11	1.42	0.51
C06A5.1	C06A5.1	C06A5.1	8.12	7.33	1.73	0.79
C06A5.10	C06A5.10	C06A5.10	0.73	1.98	0.42	-1.25		1
sir-2.4	C06A5.11	C06A5.11	6.23	5.52	1.63	0.71
C06A5.12	C06A5.12	C06A5.12	5.73	4.74	1.99	0.99
C06A5.2	C06A5.2	C06A5.2	3.57	2.95	1.54	0.62
C06A5.3	C06A5.3	C06A5.3a	8.47	7.99	1.4	0.48
C06A5.3	C06A5.3	C06A5.3b	8.76	8.08	1.6	0.68
C06A5.4	C06A5.4	C06A5.4	0	0	1	0
C06A5.5	C06A5.5	C06A5.5	0	0	1	0
C06A5.6	C06A5.6	C06A5.6	7.98	7.88	1.07	0.1
tmd-1	C06A5.7	C06A5.7a	7.32	6.19	2.2	1.13
tmd-1	C06A5.7	C06A5.7b	6.97	5.9	2.1	1.07
C06A5.8	C06A5.8	C06A5.8a	7.4	6.47	1.9	0.93
C06A5.8	C06A5.8	C06A5.8b	7.76	7	1.7	0.76
rnf-1	C06A5.9	C06A5.9	6.93	5.96	1.96	0.97
C06A6.2	C06A6.2	C06A6.2a	6.83	5.6	2.34	1.23
C06A6.2	C06A6.2	C06A6.2b	6.83	5.6	2.34	1.23
C06A6.3	C06A6.3	C06A6.3	8.71	7.77	1.92	0.94
C06A6.4	C06A6.4	C06A6.4a.1	7.89	7.07	1.76	0.82
C06A6.4	C06A6.4	C06A6.4a.2	7.89	7.07	1.76	0.82
C06A6.4	C06A6.4	C06A6.4b	7.69	6.88	1.75	0.81
C06A6.5	C06A6.5	C06A6.5	7.28	5.86	2.67	1.42
C06A6.7	C06A6.7	C06A6.7	3.76	2.68	2.11	1.07
C06A8.1	C06A8.1	C06A8.1a.1	8.37	8.28	1.06	0.09
C06A8.1	C06A8.1	C06A8.1a.2	8.71	8.61	1.07	0.1
C06A8.1	C06A8.1	C06A8.1b	8.23	8.17	1.04	0.06
C06A8.2	C06A8.2	C06A8.2	8.38	7.61	1.7	0.77
C06A8.3	C06A8.3	C06A8.3.1	9.35	8.39	1.95	0.96
C06A8.3	C06A8.3	C06A8.3.2	11.05	10.34	1.64	0.71
skr-17	C06A8.4	C06A8.4	7.8	7.59	1.15	0.21
C06A8.5	C06A8.5	C06A8.5	8.37	7.7	1.6	0.67
C06A8.6	C06A8.6	C06A8.6	3.1	1.63	2.76	1.46
srh-39	C06A8.7	C06A8.7	1.75	1.54	1.16	0.21
C06A8.8	C06A8.8	C06A8.8a	3.79	2.95	1.78	0.83
C06A8.8	C06A8.8	C06A8.8b.1	5.55	3.9	3.14	1.65
C06A8.8	C06A8.8	C06A8.8b.2	4.41	3.17	2.36	1.24
glr-4	C06A8.9	C06A8.9	3.96	2.48	2.78	1.47
C06B3.1	C06B3.1	C06B3.1	2.47	1.23	2.37	1.24
str-250	C06B3.10	C06B3.10	2.84	1.96	1.83	0.88
srx-42	C06B3.11	C06B3.11	3.29	1.79	2.82	1.49
srxa-11	C06B3.12	C06B3.12	3.27	1.96	2.47	1.3
srxa-12	C06B3.13	C06B3.13	2.44	1.87	1.49	0.58
srxa-13	C06B3.14	C06B3.14	3.28	1.97	2.48	1.31
C06B3.2	C06B3.2	C06B3.2	3.66	2.7	1.95	0.96
cyp-35C1	C06B3.3	C06B3.3	7.24	4.28	7.79	2.96	1
stdh-1	C06B3.4	C06B3.4	7.06	7.52	0.73	-0.46
C06B3.5	C06B3.5	C06B3.5	4.54	2.57	3.94	1.98	1
C06B3.6	C06B3.6	C06B3.6.1	8.7	7.07	3.09	1.63
C06B3.6	C06B3.6	C06B3.6.2	9.61	8.15	2.76	1.46
C06B3.6	C06B3.6	C06B3.6.3	9.61	8.15	2.76	1.46
C06B3.7	C06B3.7	C06B3.7	5.82	2.82	7.98	3	1
gcy-32	C06B3.8	C06B3.8.1	3.98	2.45	2.9	1.54
gcy-32	C06B3.8	C06B3.8.2	4.41	2.56	3.61	1.85	1
str-252	C06B3.9	C06B3.9	2.48	1.5	1.97	0.98
nhr-150	C06B8.1	C06B8.1	4.6	2.21	5.25	2.39	1
srh-218	C06B8.10	C06B8.10	2.64	1.36	2.43	1.28
C06B8.11	C06B8.11	C06B8.11	4.21	2.3	3.76	1.91	1
C06B8.2	C06B8.2	C06B8.2a	3.95	3.06	1.86	0.89
C06B8.2	C06B8.2	C06B8.2b	4.07	2.93	2.21	1.14
nhr-151	C06B8.3	C06B8.3	2.85	2.03	1.77	0.82
str-264	C06B8.4	C06B8.4	2.11	2.32	0.87	-0.21
srh-219	C06B8.6	C06B8.6	2.75	1.26	2.82	1.49
C06B8.7	C06B8.7	C06B8.7	7.27	5.9	2.57	1.36
rpl-38	C06B8.8	C06B8.8.1	12.66	11.99	1.58	0.66
rpl-38	C06B8.8	C06B8.8.2	12.36	11.57	1.73	0.79
rpl-38	C06B8.8	C06B8.8.3	12.71	12.08	1.54	0.62
srw-21	C06B8.9	C06B8.9	3.26	2.45	1.75	0.81
mel-11	C06C3.1	C06C3.1a	9.16	8.36	1.75	0.81
mel-11	C06C3.1	C06C3.1b	9.18	8.36	1.76	0.82
mel-11	C06C3.1	C06C3.1c	8.87	7.97	1.86	0.9
mel-11	C06C3.1	C06C3.1d	9.23	8.39	1.79	0.84
C06C3.3	C06C3.3	C06C3.3	2.9	1.52	2.6	1.38
C06C3.4	C06C3.4	C06C3.4	4.84	2.73	4.29	2.1	1
srh-48	C06C3.6	C06C3.6	3.68	1.93	3.36	1.75
C06C3.7	C06C3.7	C06C3.7	4.01	3.79	1.16	0.21
C06C3.8	C06C3.8	C06C3.8	3.56	2.29	2.42	1.27
C06C6.1	C06C6.1	C06C6.1	2.82	1.59	2.33	1.22
str-233	C06C6.2	C06C6.2	3.48	1.57	3.74	1.9	1
str-231	C06C6.3	C06C6.3	3.05	1.36	3.23	1.69
nhr-63	C06C6.4	C06C6.4	6.29	4.15	4.42	2.14	1
nhr-50	C06C6.5	C06C6.5a	6.58	3.79	6.9	2.79	1
nhr-50	C06C6.5	C06C6.5b.1	6.45	3.78	6.39	2.68	1
nhr-50	C06C6.5	C06C6.5b.2	5.92	3.41	5.71	2.51	1
C06C6.6	C06C6.6	C06C6.6	2.96	2.38	1.5	0.58
C06C6.7	C06C6.7	C06C6.7	1.85	1.34	1.43	0.51
C06C6.8	C06C6.8	C06C6.8	1.66	1.95	0.82	-0.28
C06C6.9	C06C6.9	C06C6.9	2.8	2.21	1.5	0.58
C06E1.1	C06E1.1	C06E1.1	7.17	6.47	1.62	0.69
rha-2	C06E1.10	C06E1.10	7.55	6.18	2.58	1.37
C06E1.11	C06E1.11	C06E1.11	4.13	4.06	1.05	0.07
C06E1.3	C06E1.3	C06E1.3	6.36	3.64	6.6	2.72	1
glr-1	C06E1.4	C06E1.4	4.4	2.2	4.59	2.2	1
C06E1.5	C06E1.5	C06E1.5	1.22	1.75	0.69	-0.53
C06E1.6	C06E1.6	C06E1.6	4.67	3.22	2.72	1.44
C06E1.7	C06E1.7	C06E1.7	3.11	1.85	2.4	1.26
C06E1.8	C06E1.8	C06E1.8	5.39	1.66	13.28	3.73	1
C06E1.9	C06E1.9	C06E1.9	8.01	7.06	1.92	0.94
C06E2.1	C06E2.1	C06E2.1	3.21	1.95	2.4	1.26
C06E2.2	C06E2.2	C06E2.2	2.8	1.57	2.35	1.23
ubc-21	C06E2.3	C06E2.3	2.17	2.82	0.64	-0.64
C06E2.5	C06E2.5	C06E2.5.1	6.04	5.56	1.39	0.48
C06E2.5	C06E2.5	C06E2.5.2	5.98	5.41	1.48	0.57
ubc-22	C06E2.7	C06E2.7	2.82	2.59	1.17	0.23
ins-9	C06E2.8	C06E2.8	3.88	1.53	5.11	2.35	1
C06E2.9	C06E2.9	C06E2.9	4.02	1	8.13	3.02	1
C06E4.1	C06E4.1	C06E4.1	2.35	1.5	1.8	0.85
C06E4.2	C06E4.2	C06E4.2	6.38	2.97	10.69	3.42	1
C06E4.3	C06E4.3	C06E4.3	3.63	2.35	2.43	1.28
C06E4.4	C06E4.4	C06E4.4	3.4	2.36	2.05	1.04
C06E4.5	C06E4.5	C06E4.5	3.71	2.33	2.61	1.39
C06E4.6	C06E4.6	C06E4.6	3.37	2.45	1.9	0.93
C06E4.7	C06E4.7	C06E4.7	4.31	2.87	2.71	1.44
C06E4.8	C06E4.8	C06E4.8	4.25	2.78	2.77	1.47
C06E7.1	C06E7.1	C06E7.1a.1	9.63	9.01	1.54	0.63
C06E7.1	C06E7.1	C06E7.1a.2	9.72	9.19	1.44	0.52
C06E7.1	C06E7.1	C06E7.1b	9	8.41	1.51	0.59
C06E7.1	C06E7.1	C06E7.1c	9.01	8.36	1.57	0.65
C06E7.1	C06E7.1	C06E7.1d	9.13	8.44	1.62	0.69
C06E7.2	C06E7.2	C06E7.2.1	5.16	3.48	3.21	1.68
C06E7.2	C06E7.2	C06E7.2.2	5.16	3.57	3.01	1.59
C06E7.3	C06E7.3	C06E7.3a	10.06	9.25	1.75	0.81
C06E7.3	C06E7.3	C06E7.3b.1	9.16	8.05	2.15	1.1
C06E7.3	C06E7.3	C06E7.3b.2	9.69	8.87	1.76	0.82
C06E7.3	C06E7.3	C06E7.3b.3	9.87	8.85	2.04	1.03
C06E7.3	C06E7.3	C06E7.3b.4	10.06	9.25	1.75	0.81
C06E7.4	C06E7.4	C06E7.4	8.53	6.49	4.09	2.03	1
spe-27	C06E7.6	C06E7.6	2.02	1.07	1.94	0.95
srv-17	C06E7.7	C06E7.7	2.63	2.4	1.18	0.23
prk-1	C06E8.3	C06E8.3a	7.54	6.81	1.66	0.73
prk-1	C06E8.3	C06E8.3b	7.45	6.43	2.04	1.03
prk-1	C06E8.3	C06E8.3c	7.54	6.82	1.65	0.72
C06E8.5	C06E8.5	C06E8.5	5.36	2.45	7.54	2.91	1
C06G1.1	C06G1.1	C06G1.1	6.96	3.67	9.82	3.3	1
C06G1.2	C06G1.2	C06G1.2	4.65	2.87	3.43	1.78	1
ain-1	C06G1.4	C06G1.4.1	8.34	7.44	1.87	0.9
ain-1	C06G1.4	C06G1.4.2	10.07	9.09	1.97	0.98
C06G1.5	C06G1.5	C06G1.5	6.78	3.95	7.13	2.83	1
cogc-2	C06G3.10	C06G3.10	8.23	7.33	1.87	0.9
tin-9.1	C06G3.11	C06G3.11a	5.92	6.46	0.69	-0.54
tin-9.1	C06G3.11	C06G3.11b.1	7.47	6.9	1.48	0.57
tin-9.1	C06G3.11	C06G3.11b.2	7.93	7.33	1.51	0.6
C06G3.12	C06G3.12	C06G3.12.1	4.92	1.25	12.7	3.67	1
C06G3.12	C06G3.12	C06G3.12.2	4.66	1.13	11.61	3.54	1
nhr-105	C06G3.1	C06G3.1a.1	6.36	4.13	4.69	2.23	1
nhr-105	C06G3.1	C06G3.1a.2	6.3	4.12	4.51	2.17	1
nhr-105	C06G3.1	C06G3.1b	6.35	4.07	4.87	2.28	1
klp-18	C06G3.2	C06G3.2	9.32	8.77	1.47	0.55
C06G3.3	C06G3.3	C06G3.3	6.61	6.58	1.02	0.03
C06G3.4	C06G3.4	C06G3.4	3.01	1.93	2.11	1.08
C06G3.5	C06G3.5	C06G3.5a	8.72	8.1	1.53	0.62
C06G3.5	C06G3.5	C06G3.5b.1	8.93	8.34	1.51	0.59
C06G3.5	C06G3.5	C06G3.5b.2	9.53	9.2	1.25	0.33
C06G3.6	C06G3.6	C06G3.6	7.38	6.77	1.53	0.61
trxr-1	C06G3.7	C06G3.7	8.53	7.52	2.02	1.01
C06G3.8	C06G3.8	C06G3.8	6.53	5.19	2.54	1.34
C06G3.9	C06G3.9	C06G3.9.1	8	6.93	2.1	1.07
C06G3.9	C06G3.9	C06G3.9.2	7.78	6.58	2.3	1.2
C06G4.1	C06G4.1	C06G4.1	7.01	6.23	1.72	0.79
clp-1	C06G4.2	C06G4.2a.1	8.89	8.18	1.64	0.71
clp-1	C06G4.2	C06G4.2a.2	8.89	8.18	1.64	0.71
clp-1	C06G4.2	C06G4.2b.1	8.76	7.77	1.98	0.98
clp-1	C06G4.2	C06G4.2b.2	8.25	7.4	1.8	0.85
clp-1	C06G4.2	C06G4.2b.3	8.7	7.62	2.11	1.07
clp-1	C06G4.2	C06G4.2c	8.73	7.78	1.94	0.96
clp-1	C06G4.2	C06G4.2d	8.77	8.11	1.58	0.66
C06G4.4	C06G4.4	C06G4.4	5.91	4.28	3.09	1.63
C06G4.5	C06G4.5	C06G4.5	3.89	3.3	1.51	0.59
C06G4.6	C06G4.6	C06G4.6	2.34	1.66	1.61	0.68
C06G8.1	C06G8.1	C06G8.1	6.4	4.19	4.64	2.21	1
opt-1	C06G8.2	C06G8.2	7.28	6.53	1.68	0.75
C06G8.3	C06G8.3	C06G8.3b.1	6.03	5.26	1.71	0.77
C06G8.3	C06G8.3	C06G8.3b.2	6.25	5.48	1.7	0.77
srd-7	C06G8.4	C06G8.4	2.77	1.19	2.99	1.58
atp-5	C06H2.1	C06H2.1.1	9.6	8.58	2.02	1.02
atp-5	C06H2.1	C06H2.1.2	10.06	8.99	2.1	1.07
C06H2.2	C06H2.2	C06H2.2	7.16	6.71	1.36	0.45
C06H2.3	C06H2.3	C06H2.3	6.37	5.89	1.4	0.48
tag-330	C06H2.4	C06H2.4	6.06	5.16	1.87	0.9
C06H2.5	C06H2.5	C06H2.5	4.89	2	7.38	2.88	1
C06H2.6	C06H2.6	C06H2.6.1	9.28	8.62	1.57	0.65
C06H2.6	C06H2.6	C06H2.6.2	9.48	8.97	1.42	0.51
C06H2.7	C06H2.7	C06H2.7	6.97	6.76	1.16	0.21
C06H5.1	C06H5.1	C06H5.1	5.46	5.06	1.32	0.4
C06H5.2	C06H5.2	C06H5.2	5.55	3.52	4.11	2.04	1
C06H5.6	C06H5.6	C06H5.6	5.48	5.16	1.26	0.33
C06H5.7	C06H5.7	C06H5.7.1	8.59	7.59	2	1
C06H5.7	C06H5.7	C06H5.7.2	8.81	7.8	2.02	1.01
C06H5.8	C06H5.8	C06H5.8	5.22	4.35	1.82	0.87
ham-2	C07A12.1	C07A12.1a	7.11	5.71	2.65	1.41
ham-2	C07A12.1	C07A12.1b	7.36	5.87	2.82	1.49
ham-2	C07A12.1	C07A12.1c	7.45	5.94	2.85	1.51
C07A12.2	C07A12.2	C07A12.2	7.13	4.32	7.01	2.81	1
nhr-35	C07A12.3	C07A12.3a	7.75	6.79	1.95	0.96
nhr-35	C07A12.3	C07A12.3b	7.93	6.93	2	1
pdi-2	C07A12.4	C07A12.4a.1	12.03	10.72	2.47	1.31
pdi-2	C07A12.4	C07A12.4a.2	11.91	10.5	2.66	1.41
pdi-2	C07A12.4	C07A12.4a.3	12.1	10.8	2.46	1.3
pdi-2	C07A12.4	C07A12.4b	12.21	10.98	2.35	1.23
spr-3	C07A12.5	C07A12.5a	7.08	6.15	1.91	0.93
spr-3	C07A12.5	C07A12.5b	7.08	6.35	1.66	0.73
C07A12.7	C07A12.7	C07A12.7a.1	7.85	6.58	2.42	1.27
C07A12.7	C07A12.7	C07A12.7a.2	7.98	6.78	2.3	1.2
C07A12.7	C07A12.7	C07A12.7b	8.23	7.13	2.14	1.1
C07A12.7	C07A12.7	C07A12.7c.1	8.23	7.13	2.14	1.1
C07A12.7	C07A12.7	C07A12.7c.2	8.13	7.2	1.9	0.93
C07A4.1	C07A4.1	C07A4.1	5.39	4.89	1.42	0.51
C07A4.2	C07A4.2	C07A4.2	5.04	3.16	3.68	1.88	1
C07A4.3	C07A4.3	C07A4.3	4.7	3.54	2.22	1.15
C07A9.1	C07A9.1	C07A9.1	3.11	1.37	3.33	1.74
C07A9.10	C07A9.10	C07A9.10	2.15	1.32	1.78	0.83
ncx-7	C07A9.11	C07A9.11	6	4.06	3.85	1.94	1
C07A9.12	C07A9.12	C07A9.12	4.73	3.25	2.77	1.47
C07A9.13	C07A9.13	C07A9.13	4.78	3.6	2.26	1.18
C07A9.2	C07A9.2	C07A9.2.1	8.75	8.31	1.36	0.45
C07A9.2	C07A9.2	C07A9.2.2	7.72	7.11	1.53	0.61
tlk-1	C07A9.3	C07A9.3a	10.08	9.59	1.4	0.48
tlk-1	C07A9.3	C07A9.3b	10.05	9.67	1.3	0.38
tlk-1	C07A9.3	C07A9.3c	10.3	9.95	1.27	0.34
ncx-6	C07A9.4	C07A9.4	4.9	3.13	3.41	1.77	1
C07A9.5	C07A9.5	C07A9.5	3.2	2.55	1.57	0.65
ugt-60	C07A9.6	C07A9.6.1	5.36	3.46	3.74	1.9	1
ugt-60	C07A9.6	C07A9.6.2	5.32	3.73	3	1.59
C07A9.7	C07A9.7	C07A9.7a	7.17	6.38	1.73	0.79
C07A9.7	C07A9.7	C07A9.7b	7.13	6.25	1.84	0.88
C07A9.8	C07A9.8	C07A9.8	4.63	2.3	5.02	2.33	1
C07A9.9	C07A9.9	C07A9.9	6.12	4.09	4.08	2.03	1
C07B5.2	C07B5.2	C07B5.2	1.7	1.86	0.89	-0.16
C07B5.3	C07B5.3	C07B5.3	4.94	2.73	4.64	2.21	1
C07B5.4	C07B5.4	C07B5.4a	5.04	3.85	2.28	1.19
C07B5.4	C07B5.4	C07B5.4b.1	5.1	3.99	2.16	1.11
C07B5.4	C07B5.4	C07B5.4b.2	5.03	3.91	2.16	1.11
nuc-1	C07B5.5	C07B5.5	8.2	9.6	0.38	-1.39		1
C07B5.6	C07B5.6	C07B5.6	3.82	2.06	3.38	1.76
C07C7.1	C07C7.1	C07C7.1	3	1.83	2.25	1.17
C07D10.1	C07D10.1	C07D10.1	4.85	2.94	3.74	1.9	1
bath-44	C07D10.2	C07D10.2a	8.74	7.85	1.86	0.89
bath-44	C07D10.2	C07D10.2b.1	8.62	7.63	1.98	0.99
bath-44	C07D10.2	C07D10.2b.2	8.69	7.82	1.84	0.88
sre-3	C07D10.3	C07D10.3	1.41	1.84	0.75	-0.42
nas-7	C07D10.4	C07D10.4	6.17	3.29	7.38	2.88	1
C07D10.5	C07D10.5	C07D10.5	6.96	6.56	1.32	0.4
C07D10.6	C07D10.6	C07D10.6	2.6	2.09	1.42	0.51
C07D8.2	C07D8.2	C07D8.2	5.31	3.47	3.58	1.84	1
C07D8.3	C07D8.3	C07D8.3	3.5	3.61	0.93	-0.1
C07D8.5	C07D8.5	C07D8.5	3.72	3.1	1.54	0.62
C07D8.6	C07D8.6	C07D8.6.1	10.05	9.91	1.1	0.13
C07D8.6	C07D8.6	C07D8.6.2	10.37	10.39	0.99	-0.02
C07E3.10	C07E3.10	C07E3.10	6.44	3.36	8.46	3.08	1
C07E3.1	C07E3.1	C07E3.1a	7.93	7.07	1.82	0.86
C07E3.1	C07E3.1	C07E3.1b	7.87	6.9	1.97	0.98
pro-2	C07E3.2	C07E3.2.1	7.99	6.74	2.38	1.25
pro-2	C07E3.2	C07E3.2.2	8.18	6.92	2.41	1.27
C07E3.3	C07E3.3	C07E3.3	8.21	5.79	5.37	2.42	1
C07E3.4	C07E3.4	C07E3.4	5.21	3.01	4.61	2.2	1
C07E3.5	C07E3.5	C07E3.5	3.86	1.41	5.47	2.45	1
C07E3.6	C07E3.6	C07E3.6	5.65	5.81	0.89	-0.16
C07E3.8	C07E3.8	C07E3.8	2.75	2.2	1.46	0.55
C07E3.9	C07E3.9	C07E3.9	9.6	7.65	3.86	1.95	1
tol-1	C07F11.1	C07F11.1	8.66	7.59	2.1	1.07
C07F11.2	C07F11.2	C07F11.2	4.19	2.13	4.17	2.06	1
try-2	C07G1.1	C07G1.1	3.23	2.12	2.17	1.12
C07G1.2	C07G1.2	C07G1.2	3.63	2.42	2.32	1.22
pct-1	C07G1.3	C07G1.3a.1	8.75	7.99	1.69	0.75
pct-1	C07G1.3	C07G1.3a.2	8.7	7.9	1.75	0.81
pct-1	C07G1.3	C07G1.3b	7.93	7.05	1.84	0.88
pct-1	C07G1.3	C07G1.3c	8.67	7.49	2.26	1.18
wsp-1	C07G1.4	C07G1.4a	7.88	6.83	2.07	1.05
wsp-1	C07G1.4	C07G1.4b	7.88	6.93	1.93	0.94
hgrs-1	C07G1.5	C07G1.5.1	7.66	6.33	2.51	1.33
hgrs-1	C07G1.5	C07G1.5.2	8.29	7.34	1.93	0.95
C07G1.6	C07G1.6	C07G1.6	3.33	1.78	2.93	1.55
C07G1.7	C07G1.7	C07G1.7	4.38	3	2.62	1.39
glrx-22	C07G1.8	C07G1.8	8.05	7.58	1.39	0.47
cej-1	C07G2.1	C07G2.1a.1	12.87	12.46	1.33	0.41
cej-1	C07G2.1	C07G2.1a.2	12.92	12.52	1.32	0.4
cej-1	C07G2.1	C07G2.1b.1	12.47	11.89	1.49	0.58
cej-1	C07G2.1	C07G2.1b.2	12.47	11.89	1.49	0.58
atf-7	C07G2.2	C07G2.2a.1	9.34	8.34	2	1
atf-7	C07G2.2	C07G2.2a.2	9.59	8.6	1.98	0.99
atf-7	C07G2.2	C07G2.2a.3	8.68	7.59	2.13	1.09
atf-7	C07G2.2	C07G2.2a.4	9.57	8.63	1.92	0.94
atf-7	C07G2.2	C07G2.2b	9.57	8.63	1.92	0.94
atf-7	C07G2.2	C07G2.2c.1	9.51	8.17	2.53	1.34
atf-7	C07G2.2	C07G2.2c.2	9.75	8.48	2.41	1.27
cct-5	C07G2.3	C07G2.3a	11	10.05	1.93	0.95
cct-5	C07G2.3	C07G2.3b.1	10.65	9.74	1.89	0.92
cct-5	C07G2.3	C07G2.3b.2	10.47	9.53	1.92	0.94
cct-5	C07G2.3	C07G2.3b.3	10.65	9.74	1.89	0.92
cct-5	C07G2.3	C07G2.3b.4	10.94	10.03	1.88	0.91
cct-5	C07G2.3	C07G2.3b.5	11.4	10.44	1.95	0.96
cct-5	C07G2.3	C07G2.3b.6	10.95	10.01	1.91	0.93
cct-5	C07G2.3	C07G2.3b.7	11	10.05	1.93	0.95
C07G3.10	C07G3.10	C07G3.10	4.02	3.59	1.34	0.43
C07G3.2	C07G3.2	C07G3.2	7.34	3.48	14.54	3.86	1
str-227	C07G3.3	C07G3.3	4.31	2.86	2.73	1.45
str-226	C07G3.4	C07G3.4	3.19	2.23	1.94	0.96
str-228	C07G3.5	C07G3.5	3.17	1.76	2.67	1.42
str-225	C07G3.6	C07G3.6	3.31	2.61	1.62	0.69
C07G3.8	C07G3.8	C07G3.8	2.58	2.34	1.18	0.24
ugt-64	C07G3.9	C07G3.9.1	7.17	6.43	1.67	0.74
ugt-64	C07G3.9	C07G3.9.2	7.29	6.68	1.53	0.61
C07H4.1	C07H4.1	C07H4.1	5.97	4.97	1.99	1
clh-5	C07H4.2	C07H4.2.1	7.32	6.65	1.59	0.67
clh-5	C07H4.2	C07H4.2.2	8.02	7	2.03	1.02
lig-4	C07H6.1	C07H6.1	7.07	5.97	2.14	1.1
C07H6.2	C07H6.2	C07H6.2	9.47	8.96	1.42	0.5
C07H6.3	C07H6.3	C07H6.3.1	8.29	6.08	4.62	2.21	1
C07H6.3	C07H6.3	C07H6.3.2	8.27	5.99	4.85	2.28	1
C07H6.4	C07H6.4	C07H6.4	7.71	7.66	1.04	0.05
cgh-1	C07H6.5	C07H6.5.1	11.64	11.15	1.41	0.5
cgh-1	C07H6.5	C07H6.5.2	11.94	11.51	1.34	0.43
clk-2	C07H6.6	C07H6.6	7.67	6.59	2.11	1.08
lin-39	C07H6.7	C07H6.7.1	5.44	3.82	3.06	1.61
lin-39	C07H6.7	C07H6.7.2	5.58	3.4	4.51	2.17	1
cux-7	C07H6.8	C07H6.8.1	7.12	6.57	1.46	0.55
cux-7	C07H6.8	C07H6.8.2	6.84	6.44	1.32	0.4
C07H6.9	C07H6.9	C07H6.9	2.99	1.73	2.4	1.26
sod-3	C08A9.1	C08A9.1	4.74	4.97	0.85	-0.23
C08A9.10	C08A9.10	C08A9.10	9.31	9.06	1.19	0.25
C08A9.3	C08A9.3	C08A9.3	2.45	1.86	1.5	0.59
C08A9.6	C08A9.6	C08A9.6	6.41	5.89	1.43	0.52
sdz-2	C08A9.7	C08A9.7	4.94	3.8	2.2	1.14
C08A9.8	C08A9.8	C08A9.8	5.01	3.97	2.05	1.04
C08A9.9	C08A9.9	C08A9.9	4.29	3.06	2.35	1.23
zyg-11	C08B11.1	C08B11.1	10.21	9.81	1.33	0.41
hda-2	C08B11.2	C08B11.2	7.28	6.48	1.74	0.8
C08B11.3	C08B11.3	C08B11.3	9.42	8.73	1.62	0.69
nrf-6	C08B11.4	C08B11.4	7.02	6.25	1.71	0.77
sap-49	C08B11.5	C08B11.5.1	7.88	7.6	1.22	0.28
sap-49	C08B11.5	C08B11.5.2	6.3	6.64	0.79	-0.33
sap-49	C08B11.5	C08B11.5.3	7.88	7.6	1.22	0.28
sap-49	C08B11.5	C08B11.5.4	8.03	7.34	1.61	0.69
C08B11.6	C08B11.6	C08B11.6.1	8.03	7.34	1.61	0.69
C08B11.6	C08B11.6	C08B11.6.2	8.01	7.03	1.97	0.98
ubh-4	C08B11.7	C08B11.7	7.26	6.19	2.1	1.07
C08B11.8	C08B11.8	C08B11.8	7.36	6.54	1.76	0.81
C08B11.9	C08B11.9	C08B11.9	8.14	7.28	1.82	0.86
ugt-17	C08B6.1	C08B6.1	3.79	4.69	0.53	-0.91		1
C08B6.10	C08B6.10	C08B6.10	6.33	4.58	3.37	1.75
C08B6.11	C08B6.11	C08B6.11	3.99	3.22	1.71	0.77
srxa-18	C08B6.12	C08B6.12	3.03	1.31	3.31	1.73
srxa-19	C08B6.13	C08B6.13	2.67	2.46	1.15	0.21
C08B6.14	C08B6.14	C08B6.14	2.44	2	1.36	0.45
C08B6.2	C08B6.2	C08B6.2	2.92	2.98	0.95	-0.07
C08B6.3	C08B6.3	C08B6.3	5.44	3.63	3.52	1.81	1
C08B6.4	C08B6.4	C08B6.4a	4.23	2.48	3.35	1.75
C08B6.4	C08B6.4	C08B6.4b	3.97	2.37	3.04	1.6
C08B6.5	C08B6.5	C08B6.5	2.89	1.61	2.42	1.28
C08B6.6	C08B6.6	C08B6.6	1.73	1.35	1.3	0.38
C08B6.7	C08B6.7	C08B6.7	8.36	7.52	1.79	0.84
C08B6.8	C08B6.8	C08B6.8	8.81	8.32	1.4	0.49
aos-1	C08B6.9	C08B6.9	9.19	8.39	1.74	0.8
egl-5	C08C3.1	C08C3.1a	7.1	4.23	7.3	2.87	1
egl-5	C08C3.1	C08C3.1b	6.66	3.87	6.89	2.78	1
egl-5	C08C3.1	C08C3.1c	7.09	4.39	6.53	2.71	1
bath-15	C08C3.2	C08C3.2	6.46	6.44	1.02	0.02
mab-5	C08C3.3	C08C3.3	4.78	3.22	2.95	1.56
C08C3.4	C08C3.4	C08C3.4a	8.8	8.54	1.2	0.26
C08C3.4	C08C3.4	C08C3.4b	9.16	8.83	1.26	0.33
C08D8.1	C08D8.1	C08D8.1	3.57	2.41	2.23	1.16
tmd-2	C08D8.2	C08D8.2a	5.39	4.22	2.26	1.18
tmd-2	C08D8.2	C08D8.2b	5.8	4.25	2.93	1.55
C08E3.1	C08E3.1	C08E3.1	10.8	8.25	5.83	2.54	1
C08E3.10	C08E3.10	C08E3.10a	5.7	3.6	4.28	2.1	1
C08E3.10	C08E3.10	C08E3.10b	5.75	3.8	3.87	1.95	1
C08E3.11	C08E3.11	C08E3.11	3.39	2.26	2.2	1.14
C08E3.12	C08E3.12	C08E3.12	2.44	1.77	1.59	0.67
C08E3.13	C08E3.13	C08E3.13	8.81	5.96	7.2	2.85	1
C08E3.14	C08E3.14	C08E3.14	2.21	1.83	1.3	0.38
C08E3.15	C08E3.15	C08E3.15	4.75	2.29	5.5	2.46	1
C08E3.2	C08E3.2	C08E3.2	3.32	1.55	3.42	1.77	1
bath-33	C08E3.3	C08E3.3	3.73	1.37	5.13	2.36	1
C08E3.4	C08E3.4	C08E3.4	3.95	2.08	3.64	1.86	1
C08E3.5	C08E3.5	C08E3.5	4.75	3.16	3	1.59
C08E3.6	C08E3.6	C08E3.6	4.76	3.99	1.7	0.77
C08E3.7	C08E3.7	C08E3.7	3.68	4.13	0.73	-0.45
C08E3.8	C08E3.8	C08E3.8	3.76	2.33	2.7	1.43
C08E3.9	C08E3.9	C08E3.9	5.31	3.28	4.08	2.03	1
C08E8.1	C08E8.1	C08E8.1	1.06	0.67	1.31	0.39
C08E8.2	C08E8.2	C08E8.2	2.85	2.98	0.92	-0.12
C08E8.3	C08E8.3	C08E8.3	2.74	1.75	1.99	0.99
C08E8.4	C08E8.4	C08E8.4	5.65	4.49	2.23	1.16
C08E8.5	C08E8.5	C08E8.5	1.76	1.44	1.26	0.33
C08E8.6	C08E8.6	C08E8.6	3.18	2.45	1.67	0.74
math-2	C08F1.1	C08F1.1	1.43	1.11	1.25	0.32
C08F1.10	C08F1.10	C08F1.10	5.75	5.1	1.57	0.65
C08F1.11	C08F1.11	C08F1.11	4.8	2.51	4.91	2.3	1
fbxb-13	C08F1.3	C08F1.3	5.51	4.43	2.12	1.09
math-3	C08F1.4	C08F1.4a	5.1	4.17	1.9	0.92
math-3	C08F1.4	C08F1.4b	5.11	4.2	1.88	0.91
math-4	C08F1.5	C08F1.5a	5.08	2.87	4.64	2.22	1
math-4	C08F1.5	C08F1.5b	5.09	2.84	4.73	2.24	1
C08F1.6	C08F1.6	C08F1.6	5.36	5.75	0.76	-0.39
C08F1.8	C08F1.8	C08F1.8	3.56	2.64	1.89	0.92
C08F11.1	C08F11.1	C08F11.1	3.54	1.77	3.41	1.77	1
C08F11.10	C08F11.10	C08F11.10	4.39	3.31	2.11	1.08
C08F11.11	C08F11.11	C08F11.11	10.87	10.47	1.32	0.4
C08F11.12	C08F11.12	C08F11.12.1	7.48	8.18	0.61	-0.7
C08F11.12	C08F11.12	C08F11.12.2	7.58	8.31	0.6	-0.73
C08F11.13	C08F11.13	C08F11.13.1	7.62	6.25	2.58	1.37
C08F11.13	C08F11.13	C08F11.13.2	7.79	6.43	2.56	1.36
C08F11.14	C08F11.14	C08F11.14	3.08	1.61	2.77	1.47
C08F11.17	C08F11.17	C08F11.17	3.95	1.24	6.54	2.71	1
C08F11.2	C08F11.2	C08F11.2	2.78	2.34	1.36	0.44
C08F11.3	C08F11.3	C08F11.3	3.1	2.84	1.19	0.25
sru-21	C08F11.4	C08F11.4	2.7	2.05	1.57	0.65
fbxa-98	C08F11.5	C08F11.5	4.44	3.84	1.51	0.59
C08F11.7	C08F11.7	C08F11.7	3.03	2.44	1.51	0.59
ugt-22	C08F11.8	C08F11.8	6.38	5.64	1.67	0.74
srz-29	C08F11.9	C08F11.9	2.17	1.57	1.52	0.6
pfd-1	C08F8.1	C08F8.1	9.53	8.7	1.77	0.83
C08F8.2	C08F8.2	C08F8.2a	7.04	6.35	1.61	0.69
C08F8.2	C08F8.2	C08F8.2b.1	7.33	6.71	1.54	0.62
C08F8.2	C08F8.2	C08F8.2b.2	7.33	6.71	1.54	0.62
C08F8.3	C08F8.3	C08F8.3	8.51	8.42	1.06	0.08
C08F8.4	C08F8.4	C08F8.4	2.9	2.42	1.4	0.48
fbxb-9	C08F8.5	C08F8.5	1.63	2.37	0.6	-0.74
C08F8.6	C08F8.6	C08F8.6	2.76	2.2	1.47	0.56
rap-3	C08F8.7	C08F8.7	5.69	4.27	2.68	1.42
nhr-67	C08F8.8	C08F8.8	3.69	3.31	1.3	0.38
C08F8.9	C08F8.9	C08F8.9	5.02	4.24	1.72	0.78
C08G5.1	C08G5.1	C08G5.1	2.3	2.2	1.07	0.09
C08G5.2	C08G5.2	C08G5.2	2.43	2.35	1.06	0.08
C08G5.3	C08G5.3	C08G5.3	3.51	2.8	1.63	0.71
snt-6	C08G5.4	C08G5.4	5.78	4.21	2.98	1.57
C08G5.5	C08G5.5	C08G5.5	6.22	4.26	3.9	1.97	1
C08G5.6	C08G5.6	C08G5.6	4.54	2.1	5.42	2.44	1
C08G5.7	C08G5.7	C08G5.7a	3.54	1.99	2.93	1.55
C08G5.7	C08G5.7	C08G5.7b	3.96	2.48	2.79	1.48
C08G9.1	C08G9.1	C08G9.1	7.6	5.66	3.83	1.94	1
C08G9.2	C08G9.2	C08G9.2	4.55	2.41	4.4	2.14	1
C08H9.1	C08H9.1	C08H9.1	2.81	1.85	1.94	0.95
C08H9.10	C08H9.10	C08H9.10	3.19	2.31	1.85	0.88
C08H9.11	C08H9.11	C08H9.11	3	1.29	3.27	1.71
C08H9.12	C08H9.12	C08H9.12	2.97	2.19	1.72	0.78
C08H9.13	C08H9.13	C08H9.13	3.36	2.5	1.82	0.86
C08H9.14	C08H9.14	C08H9.14	2.57	1.7	1.82	0.87
C08H9.15	C08H9.15	C08H9.15	7.42	7.06	1.28	0.36
C08H9.2	C08H9.2	C08H9.2	11.16	10.4	1.7	0.77
C08H9.3	C08H9.3	C08H9.3a	6.25	5.67	1.49	0.57
C08H9.3	C08H9.3	C08H9.3b	6.62	5.7	1.89	0.92
C08H9.4	C08H9.4	C08H9.4a	3.33	1.28	4.15	2.05	1
C08H9.4	C08H9.4	C08H9.4b	3.41	1.15	4.79	2.26	1
old-1	C08H9.5	C08H9.5	3.36	1.76	3.04	1.6
C08H9.6	C08H9.6	C08H9.6	2.56	2.5	1.05	0.07
C08H9.7	C08H9.7	C08H9.7	2.53	2.06	1.39	0.47
C08H9.8	C08H9.8	C08H9.8	3.46	1.86	3.01	1.59
ser-7	C09B7.1	C09B7.1a	4.37	2.94	2.7	1.43
ser-7	C09B7.1	C09B7.1b	4.09	2.53	2.95	1.56
ser-7	C09B7.1	C09B7.1c	4.08	2.8	2.43	1.28
C09B7.2	C09B7.2	C09B7.2	4.54	4.03	1.43	0.52
ipp-5	C09B8.1	C09B8.1	7.65	6.2	2.73	1.45
C09B8.3	C09B8.3	C09B8.3	3.69	2.34	2.56	1.35
C09B8.4	C09B8.4	C09B8.4	5.57	2.42	8.87	3.15	1
C09B8.5	C09B8.5	C09B8.5	3.89	4.22	0.8	-0.33
hsp-25	C09B8.6	C09B8.6a	8.92	7.75	2.24	1.16
hsp-25	C09B8.6	C09B8.6b	9.2	8.36	1.79	0.84
hsp-25	C09B8.6	C09B8.6c.1	8.32	7.18	2.21	1.14
hsp-25	C09B8.6	C09B8.6c.2	8.3	6.9	2.65	1.41
hsp-25	C09B8.6	C09B8.6c.3	8.17	6.93	2.36	1.24
hsp-25	C09B8.6	C09B8.6c.4	9.2	8.36	1.79	0.84
pak-1	C09B8.7	C09B8.7a.1	7.37	6.68	1.62	0.7
pak-1	C09B8.7	C09B8.7a.2	7.37	6.68	1.62	0.7
pak-1	C09B8.7	C09B8.7b	7.25	6.54	1.63	0.71
pak-1	C09B8.7	C09B8.7c.1	7.25	6.54	1.63	0.71
pak-1	C09B8.7	C09B8.7c.2	7.66	6.82	1.79	0.84
pak-1	C09B8.7	C09B8.7e.1	6.29	5.64	1.57	0.65
pak-1	C09B8.7	C09B8.7e.2	7.25	6.54	1.63	0.71
pak-1	C09B8.7	C09B8.7e.3	7.25	6.54	1.63	0.71
C09B8.8	C09B8.8	C09B8.8	3.89	1.89	4	2	1
C09B9.1	C09B9.1	C09B9.1	4.46	2.35	4.3	2.1	1
C09B9.2	C09B9.2	C09B9.2	3.38	2.14	2.36	1.24
C09B9.3	C09B9.3	C09B9.3	2.53	1.96	1.48	0.57
C09B9.4	C09B9.4	C09B9.4	3.27	2.36	1.88	0.91
msp-55	C09B9.6	C09B9.6	6.7	5.36	2.53	1.34
C09B9.7	C09B9.7	C09B9.7	3.14	2.21	1.92	0.94
C09B9.8	C09B9.8	C09B9.8	5.63	2.69	7.68	2.94	1
zig-4	C09C7.1	C09C7.1	5.06	3.66	2.63	1.4
unc-89	C09D1.1	C09D1.1a	8.06	6.31	3.36	1.75
unc-89	C09D1.1	C09D1.1b	7.91	6.19	3.3	1.72
unc-89	C09D1.1	C09D1.1c	7.28	5.85	2.7	1.44
unc-89	C09D1.1	C09D1.1d	7.54	5.99	2.94	1.56
unc-89	C09D1.1	C09D1.1e	8.02	6.25	3.4	1.77	1
unc-89	C09D1.1	C09D1.1f	7.96	6.25	3.26	1.71
unc-89	C09D1.1	C09D1.1g	8.04	6.34	3.24	1.7
C09D1.2	C09D1.2	C09D1.2	4.77	2.03	6.64	2.73	1
C09D4.1	C09D4.1	C09D4.1a	5.62	4.56	2.08	1.06
C09D4.1	C09D4.1	C09D4.1b.1	5.91	4.83	2.11	1.08
C09D4.1	C09D4.1	C09D4.1b.2	5.91	4.83	2.11	1.08
C09D4.2	C09D4.2	C09D4.2	8.38	7.76	1.53	0.61
C09D4.3	C09D4.3	C09D4.3	3.26	2.26	2.01	1.01
C09D4.4	C09D4.4	C09D4.4a	7.8	7.13	1.59	0.67
C09D4.4	C09D4.4	C09D4.4b	7.8	7.13	1.59	0.67
C09D4.4	C09D4.4	C09D4.4c	7.84	7.11	1.66	0.73
rpl-19	C09D4.5	C09D4.5.1	10.61	9.18	2.68	1.42
rpl-19	C09D4.5	C09D4.5.2	9.41	8.33	2.12	1.09
rpl-19	C09D4.5	C09D4.5.3	8.92	7.89	2.05	1.03
rpl-19	C09D4.5	C09D4.5.4	10.61	9.18	2.68	1.42
C09D4.6	C09D4.6	C09D4.6	3.62	1.74	3.69	1.88	1
ptp-3	C09D8.1	C09D8.1a	8.06	6.79	2.4	1.26
ptp-3	C09D8.1	C09D8.1b	8.97	7.81	2.23	1.16
ptp-3	C09D8.1	C09D8.1c	9.26	7.82	2.72	1.44
dgk-1	C09E10.2	C09E10.2a	6.77	3.95	7.02	2.81	1
dgk-1	C09E10.2	C09E10.2b	6.77	3.95	7.03	2.81	1
dgk-1	C09E10.2	C09E10.2c	6.83	3.92	7.5	2.91	1
dgk-1	C09E10.2	C09E10.2d	6.83	3.92	7.52	2.91	1
dgk-1	C09E10.2	C09E10.2e	6.85	4.13	6.59	2.72	1
srxa-5	C09E7.1	C09E7.1	3.99	1.57	5.32	2.41	1
C09E7.10	C09E7.10	C09E7.10	3.38	2.37	2.02	1.01
pqn-10	C09E7.2	C09E7.2	3.82	2.24	2.99	1.58
oig-1	C09E7.3	C09E7.3	5.29	3.13	4.44	2.15	1
C09E7.4	C09E7.4	C09E7.4	6.32	4.97	2.54	1.34
[truncated: 25,323 more rows]
