# Supplementary material for: A Comprehensive Analysis of Gene Expression Changes Provoked by Bacterial and Fungal Infection in C. elegans
Source: PLoS One. 2011 May 13;6(5):e19055. doi: 10.1371/journal.pone.0019055 (PMC3094335; doi:10.1371/journal.pone.0019055)
Supplement: Table S6 — Expression of transcripts after infection with P. luminescens for 24 hours using RNA-seq. Public gene, sequence and transcript names come from WS170. The values in the columns PL and OP50 are the dcpm values calculated for each individual transcript (see Methods) for samples from worms infected for 24 h with P. luminescens strain Hb, or age-matched uninfected control worms. Transcripts identified as up- or down-regulated by infection (see Methods) are indicated. “nan” signifies that there were zero bases in the denominator (see Methods). (XLS) [file pone.0019055.s010.xls]

## Sheet: RNA-seq_P.luminescens
GenePublicName	SequenceNameGene	SequenceNameTranscript	PL	OP50	Ratio_PLvsOP50	log2_Ratio_PLvsOP50	Infection_upregulated	Infection_downregulated
2L52.1	2L52.1	2L52.1	0,070149	0,082443	0.850874	-0.232983
2RSSE.1	2RSSE.1	2RSSE.1	0,909365	0,545563	1.66684	0.737114
2RSSE.2	2RSSE.2	2RSSE.2	0,131488	0,103366	1.27206	0.347169
3R5.1	3R5.1	3R5.1	0,276022	0,266413	1.03607	0.0511188
nas-6	4R79.1	4R79.1a	0,027335	0,007624	3.58532	1.8421	1
nas-6	4R79.1	4R79.1b	0,036272	0,005189	6.99023	2.80534	1
4R79.2	4R79.2	4R79.2	0,017492	0,00687	2.54614	1.34831
6R55.1	6R55.1	6R55.1a	1,6714	1,01709	1.64332	0.71661
6R55.1	6R55.1	6R55.1b	1,65021	0,955516	1.72704	0.788298
6R55.2	6R55.2	6R55.2	0,012233	0,041001	0.298349	-1.74493		1
sri-20	AC3.1	AC3.1	0,001648	0,000021	78.4829	6.29431	1
spe-10	AC3.10	AC3.10	0,00644	0,003352	1.92112	0.941949
ugt-49	AC3.2	AC3.2	0,259768	0,190666	1.36242	0.446176
abu-1	AC3.3	AC3.3	0,045236	0,007244	6.24463	2.64262	1
pqn-2	AC3.4	AC3.4	0,008075	0
AC3.5	AC3.5	AC3.5.1	0,426694	0,194448	2.19439	1.13382
AC3.5	AC3.5	AC3.5.2	0,429034	0,182211	2.3546	1.23548
col-151	AC3.6	AC3.6	0,00515	0,002194	2.34749	1.23112
ugt-1	AC3.7	AC3.7	0,051843	0,066653	0.777809	-0.362512
ugt-2	AC3.8	AC3.8	0,147248	0,050191	2.93375	1.55275
tag-49	AC7.1	AC7.1a	0,045967	0,012049	3.81503	1.93169	1
tag-49	AC7.1	AC7.1b	0,044428	0,011211	3.96293	1.98657	1
soc-2	AC7.2	AC7.2a.1	0,730212	0,348719	2.09398	1.06625
soc-2	AC7.2	AC7.2a.2	0,667703	0,298924	2.23369	1.15943
soc-2	AC7.2	AC7.2b	0,612138	0,272344	2.24766	1.16843
AC7.3	AC7.3	AC7.3	0,000753	0
AC8.10	AC8.10	AC8.10	nan	nan
AC8.11	AC8.11	AC8.11	nan	nan
AC8.12	AC8.12	AC8.12	nan	nan
AC8.3	AC8.3	AC8.3	nan	nan
AC8.4	AC8.4	AC8.4	nan	nan
AC8.7	AC8.7	AC8.7	nan	nan
AH10.1	AH10.1	AH10.1	0,00762	0,00065	11.7229	3.55125	1
AH10.2	AH10.2	AH10.2	0,002146	0,005138	0.417694	-1.25948
AH10.3	AH10.3	AH10.3	0,035448	0,006977	5.08067	2.34502	1
AH10.4	AH10.4	AH10.4	0,001865	0,058191	0.0320555	-4.96329		1
gcy-1	AH6.1	AH6.1	0,000264	0
sra-6	AH6.10	AH6.10	0,012837	0,000375	34.2317	5.09726	1
sra-7	AH6.11	AH6.11	0	0
sra-8	AH6.12	AH6.12	0	0
sra-9	AH6.14	AH6.14	0	0
AH6.2	AH6.2	AH6.2	0,004692	0
AH6.3	AH6.3	AH6.3	0,000815	0
sra-1	AH6.4	AH6.4	0	0
mex-6	AH6.5	AH6.5	7,20274	3,39756	2.11997	1.08405
sra-2	AH6.6	AH6.6	0	0
sra-3	AH6.7	AH6.7	0,001063	0,000749	1.41959	0.50547
sra-4	AH6.8	AH6.8	0	0
AH9.1	AH9.1	AH9.1	0,037678	0,019237	1.95863	0.969842
crn-4	AH9.2	AH9.2	0,93049	0,382421	2.43316	1.28283
AH9.3	AH9.3	AH9.3	0,370401	0,425061	0.871407	-0.198582
AH9.4	AH9.4	AH9.4	0,014543	0,020632	0.704895	-0.504519
AH9.6	AH9.6	AH9.6	0,157543	0,114943	1.37062	0.454827
B0001.1	B0001.1	B0001.1	4,91859	1,92265	2.55823	1.35515
B0001.2	B0001.2	B0001.2	0,67194	0,304875	2.20399	1.14011
B0001.3	B0001.3	B0001.3	0,725621	0,415656	1.74572	0.803826
B0001.4	B0001.4	B0001.4	2,15587	0,819719	2.63001	1.39507
B0001.5	B0001.5	B0001.5	0,743062	0,475407	1.563	0.644319
B0001.6	B0001.6	B0001.6.1	1,60399	1,40522	1.14145	0.190869
B0001.6	B0001.6	B0001.6.2	1,57046	1,40025	1.12156	0.165503
B0001.6	B0001.6	B0001.6.3	1,61288	1,34134	1.20244	0.265964
B0001.7	B0001.7	B0001.7	0,77766	0,360367	2.15797	1.10967
B0001.8	B0001.8	B0001.8.1	0,64416	0,452605	1.42323	0.509167
B0001.8	B0001.8	B0001.8.2	0,685195	0,451013	1.51924	0.603346
B0001.8	B0001.8	B0001.8.3	0,685491	0,450563	1.52141	0.605409
amx-2	B0019.1	B0019.1	0,548034	0,283053	1.93615	0.953193
B0019.2	B0019.2	B0019.2	0,692647	0,366317	1.89084	0.919028
col-149	B0024.1	B0024.1	1,1319	0,068379	16.5533	4.04905	1
B0024.10	B0024.10	B0024.10.1	1,22375	0,695898	1.75852	0.814361
B0024.10	B0024.10	B0024.10.2	1,2168	0,675303	1.80186	0.849485
B0024.11	B0024.11	B0024.11	0,967315	0,448906	2.15483	1.10757
gna-1	B0024.12	B0024.12	0,134662	0,071798	1.87557	0.907327
B0024.13	B0024.13	B0024.13a	2,5494	1,27197	2.00429	1.00309
B0024.13	B0024.13	B0024.13b	2,14814	1,0057	2.13596	1.09489
crm-1	B0024.14	B0024.14a	2,91226	0,613798	4.74466	2.2463	1
crm-1	B0024.14	B0024.14b	2,84725	0,581463	4.8967	2.29181	1
crm-1	B0024.14	B0024.14c.1	2,91466	0,629957	4.62676	2.21	1
crm-1	B0024.14	B0024.14c.2	2,7819	0,552662	5.03364	2.3316	1
crm-1	B0024.14	B0024.14d	2,91765	0,608112	4.79788	2.2624	1
crm-1	B0024.14	B0024.14e	2,96068	0,656593	4.50916	2.17286	1
B0024.15	B0024.15	B0024.15	0,003604	0,000351	10.2666	3.35989	1
col-150	B0024.2	B0024.2	0,120294	0,056688	2.12204	1.08545
B0024.3	B0024.3	B0024.3	0,116014	0,017719	6.54743	2.71093	1
B0024.4	B0024.4	B0024.4	3,47389	0,115402	30.1025	4.91181	1
gcy-6	B0024.6	B0024.6	0,000769	0,000143	5.37762	2.42697	1
B0024.8	B0024.8	B0024.8	0,04574	0,021476	2.12982	1.09073
trx-2	B0024.9	B0024.9.1	1,18927	1,33402	0.891493	-0.165704
trx-2	B0024.9	B0024.9.2	2,07127	2,65599	0.779849	-0.358734
vps-34	B0025.1	B0025.1a	0,921302	0,424152	2.1721	1.11909
vps-34	B0025.1	B0025.1b.1	0,865045	0,380178	2.27537	1.1861
vps-34	B0025.1	B0025.1b.2	0,921516	0,423853	2.17414	1.12045
vps-34	B0025.1	B0025.1c.1	0,921516	0,423853	2.17414	1.12045
vps-34	B0025.1	B0025.1c.2	0,933688	0,4143	2.25365	1.17226
vps-34	B0025.1	B0025.1d.1	0,965321	0,419454	2.30138	1.2025
vps-34	B0025.1	B0025.1d.2	0,966759	0,418042	2.31259	1.20951
vps-34	B0025.1	B0025.1e	0,965321	0,419454	2.30138	1.2025
csn-2	B0025.2	B0025.2.1	2,13182	1,30739	1.63059	0.705396
csn-2	B0025.2	B0025.2.2	1,96153	1,09473	1.79179	0.841404
csn-2	B0025.2	B0025.2.3	1,96271	1,09531	1.79192	0.841508
csn-2	B0025.2	B0025.2.4	1,95338	1,09072	1.79091	0.840692
B0025.4	B0025.4	B0025.4	0,92383	0,727333	1.27016	0.345011
B0034.1	B0034.1	B0034.1	0,075483	0,075677	0.997442	-0.00369549
B0034.2	B0034.2	B0034.2	0	0
casy-1	B0034.3	B0034.3a	2,23365	0,920698	2.42604	1.2786
casy-1	B0034.3	B0034.3b	3,92543	1,14754	3.42073	1.77431	1
casy-1	B0034.3	B0034.3c.1	2,13239	0,876363	2.43323	1.28287
casy-1	B0034.3	B0034.3c.2	2,16806	0,766263	2.82939	1.50049
B0034.4	B0034.4	B0034.4	0,007403	0,00476	1.55517	0.637072
B0034.5	B0034.5	B0034.5	0,015424	0,00396	3.89495	1.9616	1
B0034.7	B0034.7	B0034.7	0,021057	0,101311	0.207843	-2.26643		1
his-45	B0035.10	B0035.10	nan	nan
B0035.11	B0035.11	B0035.11	2,21533	1,17231	1.88971	0.918168
B0035.12	B0035.12	B0035.12.1	1,14273	0,555504	2.0571	1.04062
B0035.12	B0035.12	B0035.12.2	1,22581	0,549401	2.23118	1.1578
B0035.13	B0035.13	B0035.13	0,562361	0,344965	1.6302	0.705047
dnj-1	B0035.14	B0035.14.1	0,997783	0,521411	1.91362	0.936305
dnj-1	B0035.14	B0035.14.2	1,68462	0,833816	2.02037	1.01462
B0035.15	B0035.15	B0035.15	0,519415	0,315219	1.64779	0.720533
B0035.16	B0035.16	B0035.16	0,10381	0,075989	1.36612	0.450083
B0035.18	B0035.18	B0035.18	3,0839	6,45083	0.478063	-1.06473
B0035.1	B0035.1	B0035.1a	4,51425	2,10726	2.14224	1.09912
B0035.1	B0035.1	B0035.1b	3,97972	2,01772	1.97238	0.979941
dnj-2	B0035.2	B0035.2	0,741107	0,369973	2.00314	1.00226
B0035.3	B0035.3	B0035.3	3,7492	1,79038	2.09408	1.06632
pfd-4	B0035.4	B0035.4.1	2,61875	3,53256	0.741318	-0.431836
pfd-4	B0035.4	B0035.4.2	3,23368	4,25644	0.759715	-0.39647
pfd-4	B0035.4	B0035.4.3	2,61054	3,51235	0.743246	-0.428088
B0035.5	B0035.5	B0035.5.1	1,26647	0,368422	3.43755	1.78138	1
B0035.5	B0035.5	B0035.5.2	1,32422	0,371403	3.56545	1.83409	1
B0035.6	B0035.6	B0035.6	1,52402	0,658982	2.31269	1.20957
his-47	B0035.7	B0035.7	nan	nan
his-48	B0035.8	B0035.8	1,60662	1,33886	1.19999	0.263024
his-46	B0035.9	B0035.9	nan	nan
B0041.1	B0041.1	B0041.1	0,003671	0
B0041.2	B0041.2	B0041.2a.1	5,00538	1,92882	2.59505	1.37576
B0041.2	B0041.2	B0041.2a.2	5,00463	1,92835	2.59529	1.3759
B0041.2	B0041.2	B0041.2b	3,32062	1,5419	2.15359	1.10674
B0041.2	B0041.2	B0041.2c	4,87723	1,76866	2.75758	1.46341
B0041.3	B0041.3	B0041.3	0,540703	0,640204	0.844579	-0.243695
rpl-4	B0041.4	B0041.4.1	105,297	43,0345	2.4468	1.2909
rpl-4	B0041.4	B0041.4.2	104,226	44,5966	2.33708	1.22471
rpl-4	B0041.4	B0041.4.3	105,869	42,7426	2.4769	1.30853
B0041.5	B0041.5	B0041.5	1,67794	0,756011	2.21947	1.15021
ptps-1	B0041.6	B0041.6a	0,262338	0,3181	0.824703	-0.278054
ptps-1	B0041.6	B0041.6b	0,26296	0,318854	0.824703	-0.278053
xnp-1	B0041.7	B0041.7	1,10141	0,474752	2.31997	1.21411
B0041.8	B0041.8	B0041.8.1	1,7297	1,45153	1.19164	0.252947
B0041.8	B0041.8	B0041.8.2	2,1966	1,38309	1.58818	0.667377
bath-20	B0047.1	B0047.1a	0,011734	0,020339	0.576926	-0.793542
bath-20	B0047.1	B0047.1b	0,011263	0,017521	0.642806	-0.637545
B0047.2	B0047.2	B0047.2	0,027453	0,014085	1.94907	0.962788
bath-24	B0047.3	B0047.3	0,061446	0,043517	1.412	0.497735
math-1	B0047.4	B0047.4	0,001483	0,001373	1.07985	0.110827
tsp-20	B0198.1	B0198.1	0,133854	0,045097	2.96814	1.56956
B0198.2	B0198.2	B0198.2	0,066674	0,040265	1.65589	0.727607
B0198.3	B0198.3	B0198.3	0,21408	0,059728	3.58425	1.84167	1
B0205.10	B0205.10	B0205.10.1	0,015037	0,004583	3.28093	1.7141	1
B0205.10	B0205.10	B0205.10.2	0,015593	0,004731	3.29592	1.72068	1
B0205.11	B0205.11	B0205.11	2,01554	0,783002	2.57412	1.36408
B0205.12	B0205.12	B0205.12	1,40544	5,00477	0.28082	-1.83228		1
B0205.13	B0205.13	B0205.13	0,40512	0,095967	4.22145	2.07774	1
B0205.14	B0205.14	B0205.14	0,228663	0,215069	1.06321	0.0884234
B0205.1	B0205.1	B0205.1a	0,677768	0,32097	2.11162	1.07835
B0205.1	B0205.1	B0205.1b	0,625033	0,298917	2.09099	1.06419
srz-85	B0205.2	B0205.2a	0,007676	0
srz-85	B0205.2	B0205.2b	0,008041	0
rpn-10	B0205.3	B0205.3.1	4,69694	1,55073	3.02886	1.59877
rpn-10	B0205.3	B0205.3.2	4,88756	1,60941	3.03686	1.60258
B0205.4	B0205.4	B0205.4	0,019195	0,003548	5.40995	2.43562	1
B0205.5	B0205.5	B0205.5	0,014814	0,083479	0.177455	-2.49447		1
B0205.6	B0205.6	B0205.6	0,951503	0,392497	2.42423	1.27753
kin-3	B0205.7	B0205.7.1	7,93132	4,46593	1.77596	0.8286
kin-3	B0205.7	B0205.7.2	9,59925	4,42019	2.17168	1.11881
B0205.8	B0205.8	B0205.8	1,24876	2,20944	0.565193	-0.823185
B0205.9	B0205.9	B0205.9	0,689354	0,369804	1.86411	0.898484
B0207.1	B0207.1	B0207.1	0,000719	0,001195	0.601349	-0.733726
B0207.10	B0207.10	B0207.10	0,220294	0,427029	0.515876	-0.954904
B0207.11	B0207.11	B0207.11	0	0
41730	B0207.12	B0207.12a	0,097483	0,047282	2.06174	1.04387
41730	B0207.12	B0207.12b	0,090086	0,043273	2.0818	1.05783
41730	B0207.12	B0207.12c	0,103934	0,0346	3.00387	1.58682
B0207.2	B0207.2	B0207.2	0,097065	0,057894	1.67661	0.745545
gpa-14	B0207.3	B0207.3a	0,03132	0,011539	2.71426	1.44056
gpa-14	B0207.3	B0207.3b	0,029129	0,012316	2.36515	1.24193
air-2	B0207.4	B0207.4	1,73239	1,14068	1.51873	0.60287
B0207.5	B0207.5	B0207.5	0,001157	0,001319	0.877036	-0.189293
B0207.6	B0207.6	B0207.6	0,781363	0,43801	1.78389	0.835029
B0207.7	B0207.7	B0207.7	0,001439	0,000612	2.35054	1.23299
B0207.8	B0207.8	B0207.8	0	0
B0207.9	B0207.9	B0207.9	0,002096	0
B0212.1	B0212.1	B0212.1	0,008759	0,005792	1.51231	0.596757
sre-5	B0212.2	B0212.2	0,00462	0,005943	0.777449	-0.36318
B0212.3	B0212.3	B0212.3	0,088315	0,060006	1.47177	0.557553
B0212.4	B0212.4	B0212.4a	0,096372	0,072623	1.32702	0.408192
B0212.4	B0212.4	B0212.4b	0,096773	0,073106	1.32373	0.404609
B0212.4	B0212.4	B0212.4c	0,108114	0,085763	1.26061	0.334126
osm-9	B0212.5	B0212.5	0,057147	0,041471	1.378	0.46258
B0212.6	B0212.6	B0212.6	0,022038	0,007345	3.00038	1.58515
cyp-34A5	B0213.10	B0213.10	0,015007	0,010948	1.37071	0.45492
cyp-34A6	B0213.11	B0213.11	0,019041	0,019452	0.978856	-0.030832
cyp-34A7	B0213.12	B0213.12	0,013414	0,001337	10.0328	3.32665	1
cyp-34A8	B0213.14	B0213.14	0,2813	0,208059	1.35202	0.435117
cyp-34A9	B0213.15	B0213.15a	0,102026	0,453694	0.224878	-2.15278		1
cyp-34A9	B0213.15	B0213.15b	0,10378	0,455943	0.227616	-2.13533		1
cyp-34A9	B0213.15	B0213.15c	0,110054	0,519495	0.211848	-2.2389		1
cyp-34A10	B0213.16	B0213.16	0,000651	0,022541	0.0288812	-5.11373		1
nlp-34	B0213.17	B0213.17.1	12,2386	11,9804	1.02155	0.0307625
nlp-34	B0213.17	B0213.17.2	10,7798	10,4626	1.03032	0.043089
nlp-27	B0213.2	B0213.2	8,38192	94,0393	0.0891321	-3.48791		1
nlp-28	B0213.3	B0213.3	1,43733	7,17455	0.200337	-2.3195		1
nlp-29	B0213.4	B0213.4	2,95875	10,0979	0.293006	-1.771		1
nlp-30	B0213.5	B0213.5	0,253588	0,165873	1.52881	0.612407
nlp-31	B0213.6	B0213.6	4,73988	4,53151	1.04598	0.0648587
str-83	B0213.7	B0213.7	0	0
str-82	B0213.8	B0213.8	0	0
str-247	B0213.9	B0213.9	0	0
B0218.1	B0218.1	B0218.1a.1	0,759001	0,484341	1.56708	0.648079
B0218.1	B0218.1	B0218.1a.2	0,913131	0,544476	1.67708	0.745953
B0218.1	B0218.1	B0218.1a.3	0,918265	0,544906	1.68518	0.752903
B0218.1	B0218.1	B0218.1a.4	0,91971	0,544433	1.6893	0.756425
B0218.1	B0218.1	B0218.1a.5	0,918061	0,544934	1.68472	0.752509
B0218.1	B0218.1	B0218.1b.1	0,967038	0,555342	1.74134	0.800196
B0218.1	B0218.1	B0218.1b.2	0,974046	0,556046	1.75174	0.808786
B0218.1	B0218.1	B0218.1b.3	0,976136	0,555571	1.757	0.813111
B0218.2	B0218.2	B0218.2.1	2,66334	0,323751	8.22651	3.04028	1
B0218.2	B0218.2	B0218.2.2	2,72203	0,315077	8.63925	3.11091	1
pmk-1	B0218.3	B0218.3	0,620026	0,219965	2.81875	1.49505
B0218.5	B0218.5	B0218.5	0,012319	0,000863	14.2749	3.8354	1
clec-51	B0218.6	B0218.6	0,085744	0,141875	0.604364	-0.726511
B0218.7	B0218.7	B0218.7	0,015879	0,007787	2.03919	1.028
clec-52	B0218.8	B0218.8	2,63759	0,491682	5.36442	2.42342	1
B0222.1	B0222.1	B0222.1	0,1707	0,057837	2.9514	1.5614
B0222.10	B0222.10	B0222.10	0,00507	0,001829	2.77185	1.47085
B0222.11	B0222.11	B0222.11	0,006809	0,009376	0.726166	-0.461629
B0222.2	B0222.2	B0222.2	0,004457	0,000427	10.4375	3.38371	1
B0222.3	B0222.3	B0222.3	0,5725	0,278538	2.05537	1.0394
tag-38	B0222.4	B0222.4	0,129186	0,008011	16.1261	4.01132	1
B0222.5	B0222.5	B0222.5	0,261554	0,136505	1.91608	0.938155
col-144	B0222.6	B0222.6	6,42454	3,23824	1.98396	0.988383
col-145	B0222.7	B0222.7	0,115145	0,015318	7.51697	2.91015	1
col-10	B0222.8	B0222.8	13,963	9,83506	1.41972	0.505603
B0222.9	B0222.9	B0222.9	0,105001	0,09216	1.13933	0.18819
B0228.1	B0228.1	B0228.1	0,123692	0,085118	1.45318	0.539216
tag-308	B0228.4	B0228.4a	0,280858	0,166815	1.68365	0.751592
tag-308	B0228.4	B0228.4b	0,126128	0,061213	2.06048	1.04298
tag-308	B0228.4	B0228.4c	0,145083	0,057854	2.50774	1.32639
tag-308	B0228.4	B0228.4d	0,262569	0,156994	1.67248	0.741987
tag-308	B0228.4	B0228.4e	0,201411	0,067638	2.97778	1.57424
trx-1	B0228.5	B0228.5a	0,032173	0,050006	0.643389	-0.636237
trx-1	B0228.5	B0228.5b	0,033841	0,051544	0.656538	-0.607049
B0228.6	B0228.6	B0228.6	0,153466	0,193092	0.794782	-0.331369
B0228.7	B0228.7	B0228.7.1	0,964628	1,00999	0.955087	-0.0662964
B0228.7	B0228.7	B0228.7.2	0,983389	0,99718	0.98617	-0.0200917
B0228.8	B0228.8	B0228.8	0,000588	0
B0228.9	B0228.9	B0228.9	0,000501	0
B0238.1	B0238.1	B0238.1	0,131983	0,064849	2.03524	1.0252
B0238.10	B0238.10	B0238.10	2,59575	2,99656	0.866243	-0.207156
B0238.11	B0238.11	B0238.11.1	2,72554	2,2108	1.23283	0.301974
B0238.11	B0238.11	B0238.11.2	2,79321	1,87851	1.48693	0.572335
B0238.12	B0238.12	B0238.12	0,398303	0,121866	3.26837	1.70857	1
B0238.13	B0238.13	B0238.13	0,000357	0,000434	0.82244	-0.282018
B0238.15	B0238.15	B0238.15	0,04571	0,081652	0.559811	-0.836988
srt-68	B0238.3	B0238.3	0,000539	0
srt-67	B0238.5	B0238.5	0	0
srt-70	B0238.6	B0238.6	0,000835	0
B0238.7	B0238.7	B0238.7	0,000369	0
srt-69	B0238.8	B0238.8	0,000978	0,000453	2.15959	1.11076
B0238.9	B0238.9	B0238.9	1,61131	0,787653	2.04571	1.0326
rhr-2	B0240.1	B0240.1.1	0,069861	0,024585	2.84162	1.50671
rhr-2	B0240.1	B0240.1.2	0,073499	0,025607	2.87028	1.52119
spe-42	B0240.2	B0240.2	0,000487	0,000115	4.23477	2.08228	1
daf-11	B0240.3	B0240.3	0,00431	0,000639	6.74451	2.75371	1
npp-22	B0240.4	B0240.4.1	2,027	0,854951	2.3709	1.24543
npp-22	B0240.4	B0240.4.2	1,93099	0,839245	2.30087	1.20218
B0244.10	B0244.10	B0244.10	0,04522	0,01968	2.29774	1.20021
B0244.11	B0244.11	B0244.11	0,001224	0
ida-1	B0244.2	B0244.2.1	2,00166	0,983483	2.03528	1.02522
ida-1	B0244.2	B0244.2.2	2,00237	0,983648	2.03566	1.02549
B0244.4	B0244.4	B0244.4	0,005876	0
B0244.5	B0244.5	B0244.5	0,03592	0,009333	3.84866	1.94435	1
B0244.6	B0244.6	B0244.6	0,050774	0,022155	2.29175	1.19645
B0244.7	B0244.7	B0244.7	0,005859	0
egg-1	B0244.8	B0244.8	11,8637	4,25794	2.78625	1.47833
B0244.9	B0244.9	B0244.9	6,57285	2,74473	2.39472	1.25985
rpl-2	B0250.1	B0250.1.1	79,9779	11,227	7.12371	2.83263	1
rpl-2	B0250.1	B0250.1.2	79,1501	11,4672	6.9023	2.78708	1
srbc-78	B0250.10	B0250.10	0	0
B0250.2	B0250.2	B0250.2	0,093623	0,122599	0.763653	-0.389011
B0250.4	B0250.4	B0250.4	0,094718	0,103002	0.919573	-0.120963
B0250.5	B0250.5	B0250.5	1,25179	0,68797	1.81954	0.863575
srbc-79	B0250.6	B0250.6	0	0
B0250.8	B0250.8	B0250.8	0,016575	0,01523	1.08831	0.122084
B0250.9	B0250.9	B0250.9	7,97225	0,288908	27.5944	4.7863	1
B0252.1	B0252.1	B0252.1	0,06272	0,033217	1.88818	0.916997
asm-1	B0252.2	B0252.2	0,259012	0,063682	4.06727	2.02406	1
B0252.3	B0252.3	B0252.3a	0,20229	0,079729	2.53722	1.34325
B0252.3	B0252.3	B0252.3b	0,237413	0,125251	1.8955	0.922577
B0252.3	B0252.3	B0252.3c.1	0,202371	0,079798	2.53604	1.34258
B0252.3	B0252.3	B0252.3c.2	0,20229	0,079729	2.53722	1.34325
cyn-10	B0252.4	B0252.4a	1,92053	2,80926	0.683643	-0.548686
cyn-10	B0252.4	B0252.4b	0,915395	0,828991	1.10423	0.143038
B0252.5	B0252.5	B0252.5	0,02139	0,005955	3.59191	1.84475	1
B0252.8	B0252.8	B0252.8	0,412449	0,686044	0.601199	-0.734085
B0261.1	B0261.1	B0261.1.1	0,982807	0,50206	1.95755	0.969048
B0261.1	B0261.1	B0261.1.2	1,03471	0,509772	2.02975	1.0213
let-363	B0261.2	B0261.2a	0,96421	0,41521	2.32222	1.21551
let-363	B0261.2	B0261.2b	0,944329	0,407719	2.31613	1.21171
B0261.4	B0261.4	B0261.4a	1,2046	1,10655	1.08861	0.122486
B0261.4	B0261.4	B0261.4b	1,29013	0,956593	1.34867	0.431539
B0261.5	B0261.5	B0261.5	0	0,012341	0
B0261.6	B0261.6	B0261.6a	0,052346	0,023012	2.27471	1.18568
B0261.6	B0261.6	B0261.6b	0,053297	0,021754	2.45	1.29278
B0261.7	B0261.7	B0261.7	2,77619	1,47269	1.88511	0.914653
B0261.8	B0261.8	B0261.8	0,314645	0,399426	0.787743	-0.344203
tbb-4	B0272.1	B0272.1	0,269866	0,181104	1.49012	0.575425
B0272.2	B0272.2	B0272.2	0,438435	0,282829	1.55018	0.632433
B0272.3	B0272.3	B0272.3	3,25239	1,23373	2.63623	1.39847
B0272.4	B0272.4	B0272.4	0,880902	0,181119	4.86366	2.28204	1
B0273.1	B0273.1	B0273.1	0,058892	0,103507	0.568966	-0.813585
puf-7	B0273.2	B0273.2.1	2,67967	0,859658	3.11713	1.64022	1
puf-7	B0273.2	B0273.2.2	2,63662	1,01767	2.59084	1.37342
B0273.3	B0273.3	B0273.3	0,235208	0,154319	1.52417	0.608021
unc-5	B0273.4	B0273.4a	0,340158	0,181519	1.87395	0.906084
unc-5	B0273.4	B0273.4b	0,340173	0,180786	1.88163	0.911986
B0280.10	B0280.10	B0280.10	0,368107	0,244036	1.50841	0.593031
B0280.11	B0280.11	B0280.11	0,003796	0,000716	5.30173	2.40646	1
glr-2	B0280.12	B0280.12a	0,022232	0,007316	3.03883	1.60352
glr-2	B0280.12	B0280.12b	0,021867	0,006804	3.21384	1.6843	1
B0280.13	B0280.13	B0280.13	0,122206	0,056325	2.16966	1.11747
B0280.17	B0280.17	B0280.17	0,070746	0,040136	1.76266	0.817754
B0280.1	B0280.1	B0280.1a	1,61979	0,702176	2.30681	1.2059
B0280.1	B0280.1	B0280.1b	1,80914	0,744871	2.4288	1.28024
B0280.2	B0280.2	B0280.2	0,027729	0,007494	3.70015	1.88758	1
B0280.3	B0280.3	B0280.3.1	2,11527	1,072	1.9732	0.980537
B0280.3	B0280.3	B0280.3.2	2,04612	0,988267	2.07041	1.04992
B0280.3	B0280.3	B0280.3.3	1,99218	0,961168	2.07267	1.05149
odd-1	B0280.4	B0280.4	0,035462	0,031733	1.11751	0.160286
cpg-2	B0280.5	B0280.5.1	47,9936	17,1284	2.80199	1.48645
cpg-2	B0280.5	B0280.5.2	48,011	17,1044	2.80694	1.489
B0280.7	B0280.7	B0280.7	0,09258	0,004868	19.018	4.24929	1
nhr-10	B0280.8	B0280.8	0,528533	0,268803	1.96625	0.975444
B0280.9	B0280.9	B0280.9	1,27437	0,910551	1.39956	0.484972
B0281.1	B0281.1	B0281.1	0	0,002314	0
B0281.3	B0281.3	B0281.3	0,239507	0,22762	1.05222	0.0734405
B0281.4	B0281.4	B0281.4	0,046069	0,01646	2.79883	1.48483
B0281.5	B0281.5	B0281.5	0,191744	0,199844	0.959468	-0.0596928
B0281.6	B0281.6	B0281.6	0,006572	0,003005	2.18693	1.1289
B0281.8	B0281.8	B0281.8	0	0
B0284.1	B0284.1	B0284.1	0,08055	0,042064	1.91493	0.937295
B0284.2	B0284.2	B0284.2	0,019868	0,013663	1.45415	0.54018
B0284.3	B0284.3	B0284.3	0,537653	4,70982	0.114156	-3.13092		1
B0284.4	B0284.4	B0284.4	0,012625	0
B0285.1	B0285.1	B0285.1	1,1174	0,764974	1.4607	0.546663
ckb-3	B0285.10	B0285.10	0,002264	0,002397	0.944439	-0.0824707
B0285.3	B0285.3	B0285.3	1,34044	1,77995	0.753077	-0.40913
B0285.4	B0285.4	B0285.4	0,914794	0,584884	1.56406	0.645296
hse-5	B0285.5	B0285.5	0,790923	0,473646	1.66986	0.739728
B0285.6	B0285.6	B0285.6	0,019596	0,006663	2.94106	1.55634
B0285.7	B0285.7	B0285.7	0,27357	0,175299	1.56059	0.642092
ckb-1	B0285.8	B0285.8	0,074665	0,054535	1.36913	0.453259
ckb-2	B0285.9	B0285.9	0,232763	0,073582	3.16331	1.66144	1
B0286.1	B0286.1	B0286.1	0,267745	0,312338	0.857228	-0.222248
lat-2	B0286.2	B0286.2a	0,045216	0,012604	3.58742	1.84295	1
lat-2	B0286.2	B0286.2b	0,065642	0,020616	3.18401	1.67084	1
B0286.3	B0286.3	B0286.3	0,616102	0,316661	1.94562	0.96023
ntl-2	B0286.4	B0286.4a.1	1,95859	1,84627	1.06084	0.0852019
ntl-2	B0286.4	B0286.4a.2	1,97194	1,3373	1.47457	0.560293
ntl-2	B0286.4	B0286.4b	2,07897	1,1206	1.85523	0.891598
ntl-2	B0286.4	B0286.4c.1	2,08048	1,12379	1.85131	0.888544
ntl-2	B0286.4	B0286.4c.2	1,93691	1,7681	1.09548	0.131557
ntl-2	B0286.4	B0286.4c.3	1,97194	1,3373	1.47457	0.560293
ntl-2	B0286.4	B0286.4c.4	1,96502	1,17503	1.67231	0.741846
ntl-2	B0286.4	B0286.4c.5	1,95259	1,27572	1.53058	0.614077
ntl-2	B0286.4	B0286.4d.1	1,89783	1,33082	1.42606	0.512035
ntl-2	B0286.4	B0286.4d.2	1,8322	1,73251	1.05754	0.0807133
ntl-2	B0286.4	B0286.4d.3	1,86635	1,11667	1.67135	0.741017
ntl-2	B0286.4	B0286.4d.4	1,89396	1,15754	1.63619	0.710344
ntl-2	B0286.4	B0286.4d.5	1,97194	1,3373	1.47457	0.560293
fkh-6	B0286.5	B0286.5	0,125534	0,12457	1.00774	0.0111215
B0286.6	B0286.6	B0286.6	0,018975	0,007869	2.41136	1.26985
B0294.1	B0294.1	B0294.1	0,180536	0,037307	4.8392	2.27477	1
B0294.3	B0294.3	B0294.3	0,010467	0,005743	1.8226	0.865999
kin-25	B0302.1	B0302.1a	0,800705	0,39787	2.01248	1.00897
kin-25	B0302.1	B0302.1b	0,863474	0,427042	2.02199	1.01577
kin-25	B0302.1	B0302.1c	1,01606	0,468077	2.17071	1.11817
B0302.2	B0302.2	B0302.2	0,005323	0,001081	4.92394	2.29981	1
B0302.4	B0302.4	B0302.4	0,009444	0
B0302.5	B0302.5	B0302.5	0,902209	0,91728	0.98357	-0.0239005
B0303.11	B0303.11	B0303.11	0,309143	0,14241	2.1708	1.11822
B0303.14	B0303.14	B0303.14	0,11031	0,069893	1.57827	0.658344
B0303.15	B0303.15	B0303.15	1,25995	1,51571	0.831261	-0.266627
B0303.16	B0303.16	B0303.16	0,001564	0
B0303.2	B0303.2	B0303.2	0,156037	0,105058	1.48525	0.570702
B0303.3	B0303.3	B0303.3.1	4,07021	1,48225	2.74597	1.45731
B0303.3	B0303.3	B0303.3.2	4,08015	1,49611	2.72717	1.44741
B0303.3	B0303.3	B0303.3.3	4,43216	1,63462	2.71143	1.43905
B0303.4	B0303.4	B0303.4.1	1,29163	0,675939	1.91087	0.934228
B0303.4	B0303.4	B0303.4.2	1,50346	0,748714	2.00806	1.0058
B0303.7	B0303.7	B0303.7	1,16585	0,317728	3.66933	1.87552	1
sdz-1	B0303.8	B0303.8	0,004905	0,000691	7.09845	2.8275	1
B0303.9	B0303.9	B0303.9	0,490523	0,197991	2.4775	1.30889
hlh-1	B0304.1	B0304.1a	0,133198	0,14869	0.89581	-0.158735
hlh-1	B0304.1	B0304.1b	0,132005	0,145691	0.906061	-0.142319
hlh-1	B0304.1	B0304.1c	0,13307	0,14916	0.892129	-0.164675
B0304.2	B0304.2	B0304.2	1,27446	0,818213	1.55761	0.639338
cyp-23A1	B0304.3	B0304.3	0,035416	0,004084	8.67194	3.11635	1
B0304.4	B0304.4	B0304.4	0,705022	0,686564	1.02688	0.0382741
sra-32	B0304.5	B0304.5	0,015132	0,014962	1.01136	0.0162996
sra-33	B0304.6	B0304.6	0,009277	0,003137	2.95717	1.56422
sra-34	B0304.7	B0304.7	0,000587	0,000331	1.77393	0.826949
sra-35	B0304.8	B0304.8	0,006262	0,001838	3.40683	1.76843	1
sra-36	B0304.9	B0304.9	0,001816	0,003434	0.528888	-0.918967
B0310.1	B0310.1	B0310.1	0,072299	0,067003	1.07905	0.109758
B0310.2	B0310.2	B0310.2.1	0,125114	0,123348	1.01432	0.0205089
B0310.2	B0310.2	B0310.2.2	0,135689	0,129694	1.04622	0.065192
B0310.3	B0310.3	B0310.3	0,014496	0,012016	1.2064	0.270708
B0310.4	B0310.4	B0310.4	0	0
ugt-46	B0310.5	B0310.5	0,185002	0,117514	1.5743	0.654708
B0310.6	B0310.6	B0310.6	0,029171	0,020824	1.40083	0.486278
cyp-29A4	B0331.1	B0331.1	0,002868	0,010413	0.275399	-1.8604		1
B0331.2	B0331.2	B0331.2	0,091031	0,004752	19.1564	4.25976	1
B0334.1	B0334.1	B0334.1.1	3,60242	5,60115	0.643157	-0.636757
B0334.1	B0334.1	B0334.1.2	2,91428	5,35697	0.544016	-0.878278
B0334.10	B0334.10	B0334.10	0	0,010077	0
ooc-3	B0334.11	B0334.11a	0,748282	0,502588	1.48886	0.574206
ooc-3	B0334.11	B0334.11b	0,698146	0,426594	1.63656	0.710665
B0334.13	B0334.13	B0334.13	0,044267	0,049236	0.899076	-0.153485
twk-5	B0334.2	B0334.2a	0,345608	0,249243	1.38663	0.471584
twk-5	B0334.2	B0334.2b	0,367563	0,2642	1.39123	0.476361
B0334.3	B0334.3	B0334.3a.1	3,58799	2,66609	1.34579	0.42845
B0334.3	B0334.3	B0334.3a.2	3,56464	2,54743	1.39931	0.484714
B0334.3	B0334.3	B0334.3b	3,23171	2,38921	1.35263	0.435764
B0334.4	B0334.4	B0334.4	2,55366	1,55972	1.63726	0.711279
B0334.5	B0334.5	B0334.5	1,75332	1,08479	1.61628	0.692674
B0334.6	B0334.6	B0334.6	0,098535	0,023555	4.18321	2.06461	1
srh-44	B0334.7	B0334.7	0,008181	0
age-1	B0334.8	B0334.8	0,974389	0,348368	2.79701	1.48389
wrm-1	B0336.1	B0336.1.1	1,26837	0,490335	2.58674	1.37114
wrm-1	B0336.1	B0336.1.2	1,28237	0,496149	2.58465	1.36997
rpl-23	B0336.10	B0336.10.1	86,4088	73,6683	1.17294	0.230134
rpl-23	B0336.10	B0336.10.2	88,2838	73,9001	1.19464	0.256572
rpl-23	B0336.10	B0336.10.3	77,7813	63,4689	1.2255	0.293374
rpl-23	B0336.10	B0336.10.4	77,6246	63,5482	1.22151	0.288663
B0336.11	B0336.11	B0336.11a	0,177307	0,10396	1.70553	0.770221
B0336.11	B0336.11	B0336.11b	0,091456	0,045024	2.03128	1.02239
B0336.12	B0336.12	B0336.12	0,002874	0,002446	1.17487	0.2325
B0336.13	B0336.13	B0336.13	1,24468	1,76883	0.703674	-0.507021
arf-1.2	B0336.2	B0336.2.1	8,18084	4,9075	1.66701	0.737261
arf-1.2	B0336.2	B0336.2.2	12,6871	5,75899	2.20301	1.13947
B0336.3	B0336.3	B0336.3	1,90697	1,13553	1.67937	0.747916
rgs-5	B0336.4	B0336.4	0,161859	0,125376	1.29099	0.368476
B0336.5	B0336.5	B0336.5a	1,02793	0,711655	1.44442	0.530492
B0336.5	B0336.5	B0336.5b	1,18981	0,737365	1.6136	0.69028
B0336.6	B0336.6	B0336.6.1	3,6434	1,5954	2.28369	1.19137
B0336.6	B0336.6	B0336.6.2	3,73765	1,63222	2.28992	1.1953
B0336.7	B0336.7	B0336.7a	0,510387	0,30551	1.67061	0.740372
B0336.7	B0336.7	B0336.7b.1	0,510418	0,309464	1.64936	0.721908
B0336.7	B0336.7	B0336.7b.2	0,508868	0,308518	1.64939	0.721937
lgg-3	B0336.8	B0336.8	2,13584	4,0509	0.527251	-0.923439
swp-1	B0336.9	B0336.9a	0,555444	0,408924	1.35831	0.441809
swp-1	B0336.9	B0336.9b.1	0,484334	0,376793	1.28541	0.36223
swp-1	B0336.9	B0336.9b.2	0,556606	0,411876	1.35139	0.434446
swp-1	B0336.9	B0336.9c	0,015559	0,027051	0.575162	-0.79796
swp-1	B0336.9	B0336.9d	0,556675	0,411741	1.352	0.435098
swp-1	B0336.9	B0336.9e	0,497053	0,241896	2.05482	1.03901
wrt-9	B0344.2	B0344.2	0,348061	0,024651	14.1195	3.81962	1
B0348.1	B0348.1	B0348.1	0,021468	0
B0348.2	B0348.2	B0348.2	0,567328	0,205832	2.75627	1.46272
egl-8	B0348.4	B0348.4a	0,61682	0,403278	1.52952	0.613075
egl-8	B0348.4	B0348.4b	0,611671	0,40076	1.52628	0.610017
egl-8	B0348.4	B0348.4c	0,484251	0,313901	1.54269	0.625445
B0348.5	B0348.5	B0348.5	0,03792	0,004642	8.16896	3.03015	1
ife-3	B0348.6	B0348.6a.1	7,87365	5,19255	1.51634	0.600589
ife-3	B0348.6	B0348.6a.2	9,11388	4,45864	2.04409	1.03146
ife-3	B0348.6	B0348.6b	10,7542	3,46023	3.10794	1.63596	1
ife-3	B0348.6	B0348.6c	10,7913	3,42831	3.1477	1.6543	1
unc-44	B0350.2	B0350.2a.1	3,03567	1,68966	1.79662	0.845282
unc-44	B0350.2	B0350.2a.2	2,9879	1,62664	1.83685	0.877237
unc-44	B0350.2	B0350.2b.1	4,10829	1,76564	2.3268	1.21835
unc-44	B0350.2	B0350.2b.2	4,02237	1,72341	2.33396	1.22278
unc-44	B0350.2	B0350.2c.1	3,43651	1,64783	2.08548	1.06038
unc-44	B0350.2	B0350.2c.2	3,38594	1,57838	2.1452	1.10111
unc-44	B0350.2	B0350.2d.1	3,88728	1,74054	2.23338	1.15923
unc-44	B0350.2	B0350.2d.2	4,02237	1,72341	2.33396	1.22278
unc-44	B0350.2	B0350.2d.3	4,12244	1,80027	2.2899	1.19529
unc-44	B0350.2	B0350.2e.1	3,42839	1,63532	2.09646	1.06796
unc-44	B0350.2	B0350.2e.2	3,37337	1,56654	2.15339	1.10661
unc-44	B0350.2	B0350.2f.1	1,41893	0,585129	2.42499	1.27798
unc-44	B0350.2	B0350.2f.2	1,45707	0,601773	2.4213	1.27578
unc-44	B0350.2	B0350.2g.1	2,82229	1,42301	1.98332	0.98792
unc-44	B0350.2	B0350.2g.2	2,71047	1,39303	1.94574	0.960317
B0350.3	B0350.3	B0350.3	0	0
B0353.1	B0353.1	B0353.1	1,07593	0,792323	1.35794	0.441424
B0361.10	B0361.10	B0361.10	1,70328	1,08693	1.56706	0.648057
B0361.11	B0361.11	B0361.11	0,003674	0,001179	3.11645	1.63991	1
B0361.2	B0361.2	B0361.2a	0,549516	0,385094	1.42697	0.512951
B0361.2	B0361.2	B0361.2b	0,330816	0,251406	1.31586	0.39601
B0361.3	B0361.3	B0361.3.1	0,590706	0,347492	1.69991	0.765461
B0361.3	B0361.3	B0361.3.2	0,575357	0,332184	1.73204	0.792475
B0361.4	B0361.4	B0361.4	0,399112	0,275667	1.4478	0.533867
psd-1	B0361.5	B0361.5a	2,87791	1,15326	2.49546	1.3193
psd-1	B0361.5	B0361.5b	2,73251	1,3063	2.09179	1.06474
B0361.6	B0361.6	B0361.6	0,845275	0,445453	1.89756	0.924148
B0361.7	B0361.7	B0361.7	0,659997	0,341654	1.93177	0.949923
B0361.8	B0361.8	B0361.8.1	1,9523	0,789801	2.47189	1.30561
B0361.8	B0361.8	B0361.8.2	2,05273	0,827916	2.47939	1.30999
B0361.9	B0361.9	B0361.9	1,28451	1,65716	0.775127	-0.367495
B0365.1	B0365.1	B0365.1	3,52669	1,27499	2.76605	1.46783
eat-6	B0365.3	B0365.3.1	18,8304	6,39929	2.94258	1.55708
eat-6	B0365.3	B0365.3.2	19,3061	6,53796	2.95292	1.56214
eat-6	B0365.3	B0365.3.3	18,8665	6,40533	2.94544	1.55848
B0365.5	B0365.5	B0365.5a	0,149887	0,091631	1.63577	0.709968
B0365.5	B0365.5	B0365.5b	0,16669	0,043929	3.79453	1.92392	1
clec-41	B0365.6	B0365.6.1	3,12044	0,562323	5.5492	2.47228	1
clec-41	B0365.6	B0365.6.2	3,12044	0,562323	5.5492	2.47228	1
clec-41	B0365.6	B0365.6.3	3,12044	0,562323	5.5492	2.47228	1
B0365.7	B0365.7	B0365.7	0,001783	0,000251	7.10243	2.82831	1
B0379.1	B0379.1	B0379.1	0,777242	1,15846	0.670927	-0.575772
B0379.2	B0379.2	B0379.2	0,007535	0
mut-16	B0379.3	B0379.3a	1,47994	1,01126	1.46346	0.549385
mut-16	B0379.3	B0379.3b	1,4736	0,973198	1.51418	0.59854
tag-188	B0379.4	B0379.4a	1,98463	1,1793	1.68289	0.750939
tag-188	B0379.4	B0379.4b	1,30715	0,770187	1.69719	0.763144
B0379.6	B0379.6	B0379.6	0,003823	0
B0379.7	B0379.7	B0379.7.1	0,005153	0,005779	0.891717	-0.165343
B0379.7	B0379.7	B0379.7.2	0,005243	0,005387	0.973308	-0.0390317
B0391.10	B0391.10	B0391.10	0,171741	0,118247	1.45239	0.538431
B0391.11	B0391.11	B0391.11	0,009563	0,010669	0.896364	-0.157843
str-263	B0391.12	B0391.12	0	0
B0391.3	B0391.3	B0391.3	0	0
str-12	B0391.4	B0391.4	0	0
B0391.5	B0391.5	B0391.5	0,138374	0,12606	1.09768	0.134462
B0391.6	B0391.6	B0391.6	0,005167	0,002944	1.75505	0.811513
B0391.9	B0391.9	B0391.9	0,010693	0,027376	0.390594	-1.35626
rps-0	B0393.1	B0393.1.1	132,921	68,5142	1.94005	0.956094
rps-0	B0393.1	B0393.1.2	135,292	68,3826	1.97846	0.984375
rps-0	B0393.1	B0393.1.3	134,935	68,1834	1.979	0.984772
rps-0	B0393.1	B0393.1.4	135,115	68,2831	1.97875	0.984587
rbg-3	B0393.2	B0393.2.1	1,94457	0,971473	2.00167	1.00121
rbg-3	B0393.2	B0393.2.2	2,00834	0,949077	2.1161	1.08141
B0393.3	B0393.3	B0393.3	1,8725	1,32623	1.4119	0.497635
B0393.4	B0393.4	B0393.4	0,010941	0,000733	14.9269	3.89984	1
B0393.5	B0393.5	B0393.5	0,172998	0,018641	9.28051	3.2142	1
B0393.6	B0393.6	B0393.6	2,6782	1,2615	2.12303	1.08612
B0393.7	B0393.7	B0393.7	0,015351	0,00801	1.91645	0.93844
B0393.8	B0393.8	B0393.8	nan	nan
B0393.9	B0393.9	B0393.9.1	0,237772	0,327622	0.725751	-0.462453
B0393.9	B0393.9	B0393.9.2	0,264387	0,344215	0.768087	-0.380659
nhx-1	B0395.1	B0395.1	0,026982	0,018556	1.45406	0.54009
B0395.2	B0395.2	B0395.2	0,300271	0,022281	13.4765	3.75238	1
B0395.3	B0395.3	B0395.3.1	1,04582	0,615768	1.6984	0.764176
B0395.3	B0395.3	B0395.3.2	1,09708	0,634352	1.72945	0.790313
B0399.1	B0399.1	B0399.1a	0,274115	0,15347	1.78611	0.836825
B0399.1	B0399.1	B0399.1b	0,300234	0,162383	1.84893	0.886687
B0399.1	B0399.1	B0399.1c	0,367374	0,193386	1.89969	0.925766
B0399.1	B0399.1	B0399.1d	0,288778	0,157882	1.82907	0.871114
B0399.1	B0399.1	B0399.1e	0,309217	0,170036	1.81854	0.862779
B0399.2	B0399.2	B0399.2	0,141274	0,020437	6.91266	2.78924	1
ubc-17	B0403.2	B0403.2	0,04212	0,016549	2.54514	1.34775
B0403.3	B0403.3	B0403.3	1,73543	0,188793	9.19224	3.20042	1
tag-320	B0403.4	B0403.4	7,71402	3,31294	2.32845	1.21937
B0403.5	B0403.5	B0403.5	0,181476	0,02813	6.45133	2.6896	1
B0403.6	B0403.6	B0403.6	0,049974	0,047972	1.04174	0.0589909
B0410.1	B0410.1	B0410.1	0	0
vang-1	B0410.2	B0410.2a	0,323935	0,239025	1.35523	0.438543
vang-1	B0410.2	B0410.2b	0,296605	0,227022	1.3065	0.385711
B0410.3	B0410.3	B0410.3	0,265351	0,356707	0.743891	-0.426838
dac-1	B0412.1	B0412.1a	0,047562	0,012996	3.65975	1.87174	1
dac-1	B0412.1	B0412.1b	0,044072	0,011728	3.75785	1.90991	1
daf-7	B0412.2	B0412.2	0,279902	0,030587	9.15101	3.19393	1
B0412.3	B0412.3	B0412.3.1	0,926244	0,500925	1.84907	0.886798
B0412.3	B0412.3	B0412.3.2	0,941158	0,508433	1.8511	0.888379
rps-29	B0412.4	B0412.4.1	99,7336	376,881	0.264629	-1.91796		1
rps-29	B0412.4	B0412.4.2	117,733	435,546	0.270311	-1.88731		1
rps-29	B0412.4	B0412.4.3	118,063	441,323	0.267521	-1.90228		1
rps-29	B0412.4	B0412.4.4	102,347	378,124	0.27067	-1.88539		1
srz-4	B0414.1	B0414.1	0,001262	0,001683	0.749875	-0.415278
rnt-1	B0414.2	B0414.2	0,030903	0,043328	0.713239	-0.487543
hil-5	B0414.3	B0414.3	10,2543	11,9012	0.861619	-0.214878
cpb-3	B0414.5	B0414.5	1,79544	0,811957	2.21125	1.14486
glh-3	B0414.6	B0414.6	0,80699	0,303599	2.65808	1.41038
mtk-1	B0414.7	B0414.7a	0,834192	0,374822	2.22557	1.15417
mtk-1	B0414.7	B0414.7b	0,840371	0,371325	2.26317	1.17834
B0414.8	B0414.8	B0414.8a	0,739146	0,283259	2.60944	1.38374
B0414.8	B0414.8	B0414.8b	0,736732	0,280594	2.62562	1.39266
B0416.1	B0416.1	B0416.1	0,082796	0,044232	1.87186	0.904472
B0416.2	B0416.2	B0416.2	0,092094	0,015286	6.0247	2.59089	1
B0416.3	B0416.3	B0416.3	0,117959	0,064668	1.82407	0.867162
B0416.4	B0416.4	B0416.4	0,204751	0,281415	0.727577	-0.458829
B0416.5	B0416.5	B0416.5a.1	4,07479	1,98405	2.05377	1.03828
B0416.5	B0416.5	B0416.5a.2	4,27869	2,01474	2.12369	1.08658
B0416.5	B0416.5	B0416.5b	5,14618	2,29026	2.24699	1.16799
gly-13	B0416.6	B0416.6	0,777145	0,348261	2.2315	1.15801
B0416.7	B0416.7	B0416.7a	0,253097	0,296293	0.854212	-0.227334
B0416.7	B0416.7	B0416.7b	0,20018	0,152633	1.31151	0.391231
B0432.1	B0432.1	B0432.1	0,013507	0,001119	12.0702	3.59338	1
B0432.10	B0432.10	B0432.10	0,252519	0,219073	1.15267	0.20498
B0432.11	B0432.11	B0432.11	0,001337	0
B0432.12	B0432.12	B0432.12	0,001837	0
B0432.13	B0432.13	B0432.13.1	0,32062	0,246348	1.30149	0.380167
B0432.13	B0432.13	B0432.13.2	0,335394	0,234507	1.43021	0.516226
B0432.14	B0432.14	B0432.14	0,492722	0,702515	0.701369	-0.511755
djr-1.1	B0432.2	B0432.2	2,3521	1,57999	1.48868	0.574034
B0432.3	B0432.3	B0432.3	1,09742	1,21253	0.905066	-0.143905
B0432.4	B0432.4	B0432.4	1,27561	1,06156	1.20164	0.265001
cat-2	B0432.5	B0432.5a	0,00735	0,004533	1.62152	0.697345
cat-2	B0432.5	B0432.5b	0,011559	0,004679	2.47049	1.30479
B0432.6	B0432.6	B0432.6	0,239581	0,151043	1.58618	0.665554
B0432.7	B0432.7	B0432.7	0,207464	0,137478	1.50907	0.59366
B0432.8	B0432.8	B0432.8	0,414333	0,223981	1.84986	0.887414
B0432.9	B0432.9	B0432.9	0,05815	0,056745	1.02476	0.0352909
lin-8	B0454.1	B0454.1	0,216344	0,229961	0.940786	-0.0880621
sri-30	B0454.10	B0454.10	0,022879	0,025387	0.901201	-0.150079
sri-31	B0454.2	B0454.2	0,013864	0,005986	2.31614	1.21172
sri-28	B0454.3	B0454.3	0,003108	0
sri-29	B0454.4	B0454.4	0,019131	0,026548	0.720623	-0.472683
B0454.5	B0454.5	B0454.5	0,177713	0,368266	0.482567	-1.0512
B0454.6	B0454.6	B0454.6	0,236258	0,082847	2.85174	1.51184
clec-2	B0454.7	B0454.7	0,001544	0,001139	1.35542	0.438737
B0454.8	B0454.8	B0454.8	0,042079	0,004841	8.69229	3.11974	1
B0454.9	B0454.9	B0454.9	0,249272	0,286607	0.869735	-0.201353
lat-1	B0457.1	B0457.1a	3,07336	1,19066	2.58122	1.36806
lat-1	B0457.1	B0457.1b	2,93868	1,14529	2.56588	1.35946
lat-1	B0457.1	B0457.1c	3,51034	1,33843	2.62273	1.39107
B0457.2	B0457.2	B0457.2	0,655553	0,334023	1.9626	0.972765
B0457.4	B0457.4	B0457.4	0	0
B0457.6	B0457.6	B0457.6	2,78476	1,77951	1.5649	0.646073
B0462.1	B0462.1	B0462.1	0,00243	0,002543	0.955395	-0.0658305
fbxb-119	B0462.3	B0462.3	0,023392	0,022148	1.05617	0.078845
B0462.4	B0462.4	B0462.4	0,010609	0,004426	2.39709	1.26128
drs-1	B0464.1	B0464.1.1	7,7409	2,77387	2.79065	1.4806
drs-1	B0464.1	B0464.1.2	7,16496	2,66005	2.69354	1.42951
B0464.2	B0464.2	B0464.2	1,41582	0,672242	2.10612	1.07459
nlp-36	B0464.3	B0464.3.1	9,6649	32,3229	0.299011	-1.74173		1
nlp-36	B0464.3	B0464.3.2	9,43047	31,3378	0.30093	-1.7325		1
bre-3	B0464.4	B0464.4.1	1,92011	0,828594	2.31731	1.21245
bre-3	B0464.4	B0464.4.2	2,22311	1,00617	2.20948	1.14371
spk-1	B0464.5	B0464.5a	2,77631	1,19768	2.31807	1.21293
spk-1	B0464.5	B0464.5b.1	4,05403	2,41575	1.67817	0.746886
spk-1	B0464.5	B0464.5b.2	4,36723	1,89733	2.30178	1.20275
spk-1	B0464.5	B0464.5c.1	3,84543	2,25706	1.70373	0.7687
spk-1	B0464.5	B0464.5c.2	4,08059	1,88617	2.16343	1.11332
B0464.6	B0464.6	B0464.6.1	1,77154	0,873813	2.02737	1.01961
B0464.6	B0464.6	B0464.6.2	1,75461	0,872263	2.01156	1.00832
B0464.6	B0464.6	B0464.6.3	1,91673	1,20542	1.59009	0.669111
baf-1	B0464.7	B0464.7.1	4,35962	7,24465	0.601771	-0.732714
baf-1	B0464.7	B0464.7.2	6,11531	9,13388	0.669519	-0.578802
tag-342	B0464.8	B0464.8	0,642248	0,369511	1.7381	0.797513
B0464.9	B0464.9	B0464.9	0,924551	0,494765	1.86867	0.902009
jnk-1	B0478.1	B0478.1a	0,13466	0,06386	2.10868	1.07634
jnk-1	B0478.1	B0478.1b.1	0,118853	0,053596	2.21757	1.14898
jnk-1	B0478.1	B0478.1b.2	0,118725	0,053534	2.21775	1.1491
jnk-1	B0478.1	B0478.1b.3	0,13466	0,06386	2.10868	1.07634
jnk-1	B0478.1	B0478.1b.4	0,118347	0,05335	2.21831	1.14946
B0478.3	B0478.3	B0478.3	0,015779	0,022524	0.700533	-0.513476
B0491.1	B0491.1	B0491.1	0,885193	0,475808	1.8604	0.895613
sqt-1	B0491.2	B0491.2.1	12,1555	0,43791	27.758	4.79483	1
sqt-1	B0491.2	B0491.2.2	12,1173	0,437957	27.6678	4.79014	1
sqt-1	B0491.2	B0491.2.3	11,9992	0,441702	27.1658	4.76372	1
B0491.3	B0491.3	B0491.3	0,035107	0,038929	0.901824	-0.149082
B0491.4	B0491.4	B0491.4	0,040729	0,016127	2.52553	1.33659
B0491.5	B0491.5	B0491.5.1	6,70523	3,44023	1.94906	0.962782
B0491.5	B0491.5	B0491.5.2	6,69386	3,41924	1.9577	0.969163
B0491.5	B0491.5	B0491.5.3	6,06617	3,05979	1.98254	0.987353
B0491.5	B0491.5	B0491.5.4	6,10161	3,07621	1.98348	0.988036
B0491.6	B0491.6	B0491.6.1	0,412527	0,390897	1.05533	0.0777
B0491.6	B0491.6	B0491.6.2	0,407868	0,381053	1.07037	0.0981106
B0491.7	B0491.7	B0491.7	0,627965	0,39469	1.59103	0.669964
clh-2	B0491.8	B0491.8a	0,063442	0,033764	1.87898	0.909948
clh-2	B0491.8	B0491.8b	0,06059	0,033179	1.82616	0.868816
clh-2	B0491.8	B0491.8c	0,063937	0,035201	1.81635	0.861039
sre-1	B0495.1	B0495.1	0,000827	0,000331	2.49857	1.3211
tag-178	B0495.10	B0495.10a	0,245858	0,109507	2.24514	1.1668
tag-178	B0495.10	B0495.10b	0,228957	0,088552	2.58557	1.37048
tag-178	B0495.10	B0495.10c	0,240087	0,104264	2.30268	1.20332
B0495.2	B0495.2	B0495.2	0,723175	0,519473	1.39213	0.477296
nhx-2	B0495.4	B0495.4	0,66806	0,153704	4.34641	2.11982	1
B0495.5	B0495.5	B0495.5.1	0,554483	0,31469	1.762	0.817212
B0495.5	B0495.5	B0495.5.2	0,561489	0,31847	1.76308	0.8181
B0495.6	B0495.6	B0495.6	4,15726	13,3073	0.312404	-1.67851
B0495.7	B0495.7	B0495.7.1	2,69419	0,949449	2.83764	1.50469
B0495.7	B0495.7	B0495.7.2	2,79453	0,953824	2.92982	1.55081
B0495.8	B0495.8	B0495.8a	1,15404	0,852805	1.35323	0.436405
B0495.8	B0495.8	B0495.8b	1,16185	0,918239	1.2653	0.339482
B0495.9	B0495.9	B0495.9	0,72492	0,625599	1.15876	0.212584
B0496.1	B0496.1	B0496.1	0,004766	0
B0496.2	B0496.2	B0496.2	0,012591	0,00034	37.0329	5.21074	1
B0496.3	B0496.3	B0496.3a	0,439493	0,149381	2.94209	1.55684
B0496.3	B0496.3	B0496.3b	0,41761	0,144459	2.89085	1.5315
B0496.3	B0496.3	B0496.3c	0,551795	0,193096	2.85762	1.51481
B0496.4	B0496.4	B0496.4	0,032905	0,013536	2.43096	1.28153
B0496.5	B0496.5	B0496.5	0,001457	0
B0496.6	B0496.6	B0496.6	0	0,001394	0
B0496.7	B0496.7	B0496.7	4,76007	3,78573	1.25737	0.330411
tag-224	B0496.8	B0496.8	0,699837	0,282903	2.47377	1.30671
B0507.1	B0507.1	B0507.1	0,236013	0,044315	5.3258	2.413	1
B0507.10	B0507.10	B0507.10	0,176635	0,069942	2.52545	1.33654
srx-115	B0507.11	B0507.11	0,001905	0,001931	0.986515	-0.0195875
B0507.2	B0507.2	B0507.2	1,04819	0,512665	2.04459	1.03181
B0507.3	B0507.3	B0507.3a	0,259205	0,221032	1.1727	0.229838
B0507.3	B0507.3	B0507.3b	0,303564	0,222789	1.36256	0.446323
B0507.4	B0507.4	B0507.4	0,004602	0,003483	1.32142	0.402087
B0507.5	B0507.5	B0507.5	0	0
B0507.6	B0507.6	B0507.6	0,046268	0,013512	3.42418	1.77576	1
B0507.7	B0507.7	B0507.7	0,004753	0,001215	3.9119	1.96787	1
B0507.8	B0507.8	B0507.8	0,211312	0,062496	3.38121	1.75754	1
B0507.9	B0507.9	B0507.9	0,0022	0,002466	0.891979	-0.164918
fkb-7	B0511.1	B0511.1	0,149497	0,092334	1.61909	0.695183
eif-3.E	B0511.10	B0511.10	1,995	1,49872	1.33114	0.412658
B0511.11	B0511.11	B0511.11	0,054331	0,051291	1.05927	0.0830646
B0511.12	B0511.12	B0511.12	1,39524	0,657611	2.12168	1.08521
B0511.13	B0511.13	B0511.13	0,663311	0,538713	1.23129	0.300169
B0511.14	B0511.14	B0511.14a	0,925145	0,40418	2.28894	1.19468
B0511.14	B0511.14	B0511.14b	1,01646	0,438924	2.3158	1.21151
B0511.2	B0511.2	B0511.2	0,014275	0,001883	7.58099	2.92239	1
fbxa-125	B0511.3	B0511.3	0,003804	0
tag-344	B0511.4	B0511.4	0,001895	0,000641	2.95613	1.56371
B0511.5	B0511.5	B0511.5	0,187734	0,054514	3.44378	1.78399	1
B0511.6	B0511.6	B0511.6.1	4,48421	2,90929	1.54134	0.624187
B0511.6	B0511.6	B0511.6.2	5,35261	3,0946	1.72966	0.79049
B0511.7	B0511.7	B0511.7	1,80266	1,34303	1.34223	0.424636
tag-264	B0511.8	B0511.8.1	1,19718	0,553405	2.1633	1.11323
tag-264	B0511.8	B0511.8.2	1,18865	0,534486	2.22391	1.1531
mat-4	B0511.9	B0511.9a	3,06998	2,48657	1.23462	0.304072
mat-4	B0511.9	B0511.9b	2,83772	1,25087	2.2686	1.1818
lin-66	B0513.1	B0513.1	1,96386	1,12591	1.74424	0.802601
B0513.2	B0513.2	B0513.2	1,49287	0,890158	1.67708	0.745955
rpl-29	B0513.3	B0513.3.1	303,148	858,313	0.353191	-1.50148
rpl-29	B0513.3	B0513.3.2	364,011	1025,58	0.354932	-1.49439
B0513.4	B0513.4	B0513.4	7,56314	12,5972	0.600383	-0.736046
B0513.5	B0513.5	B0513.5	0,396808	0,182711	2.17178	1.11888
B0513.6	B0513.6	B0513.6	0,00891	0
B0513.9	B0513.9	B0513.9a	1,23341	4,81772	0.256015	-1.9657		1
B0513.9	B0513.9	B0513.9b.1	1,17837	5,60073	0.210396	-2.24882		1
B0513.9	B0513.9	B0513.9b.2	1,24813	4,72597	0.2641	-1.92084		1
kin-31	B0523.1	B0523.1	0,012968	0,005674	2.28551	1.19252
pgl-2	B0523.3	B0523.3	0,40358	0,236073	1.70956	0.773622
fli-1	B0523.5	B0523.5	0,760972	0,243331	3.12731	1.64492	1
B0524.1	B0524.1	B0524.1	0,16904	0,180267	0.93772	-0.0927706
B0524.2	B0524.2	B0524.2	0,000323	0,002055	0.15697	-2.67144		1
B0524.3	B0524.3	B0524.3	0,000212	0,000393	0.540382	-0.887949
B0524.4	B0524.4	B0524.4	0,000349	0,00023	1.51665	0.600886
B0524.5	B0524.5	B0524.5	0,003603	0,010094	0.356958	-1.48618
B0524.6	B0524.6	B0524.6	0,378379	0,698719	0.541532	-0.88488
B0524.7	B0524.7	B0524.7	0,302006	0,273866	1.10275	0.141107
tpa-1	B0545.1	B0545.1a	0,540818	0,298812	1.80989	0.855905
tpa-1	B0545.1	B0545.1b.1	0,477512	0,291034	1.64074	0.714349
tpa-1	B0545.1	B0545.1b.2	0,481063	0,287663	1.67231	0.741846
B0545.3	B0545.3	B0545.3	0,00807	0,003994	2.02063	1.0148
B0545.4	B0545.4	B0545.4	0,059453	0,027769	2.14098	1.09827
37377	B0546.1	B0546.1.1	8,12133	20,9768	0.387158	-1.36901
37377	B0546.1	B0546.1.2	7,96677	20,4533	0.38951	-1.36027
37377	B0546.1	B0546.1.3	8,08564	20,7569	0.38954	-1.36016
B0546.2	B0546.2	B0546.2.1	1,17289	0,651777	1.79953	0.847617
B0546.2	B0546.2	B0546.2.2	1,30451	0,721947	1.80693	0.853543
B0546.3	B0546.3	B0546.3	0,541452	0,532742	1.01635	0.0233964
B0546.4	B0546.4	B0546.4a	1,11144	1,60523	0.692387	-0.53035
B0546.4	B0546.4	B0546.4b	0,53596	0,7403	0.723977	-0.465985
B0546.5	B0546.5	B0546.5	0,002192	0
csn-5	B0547.1	B0547.1.1	2,73515	1,13748	2.40457	1.26578
csn-5	B0547.1	B0547.1.2	2,8085	1,13512	2.47419	1.30695
B0547.2	B0547.2	B0547.2	0	0
srd-8	B0547.4	B0547.4	0	0,000364	0
B0554.1	B0554.1	B0554.1	0	0
B0554.2	B0554.2	B0554.2	0,000192	0
B0554.3	B0554.3	B0554.3	0	0
B0554.4	B0554.4	B0554.4	0,003746	0
B0554.5	B0554.5	B0554.5	0,043811	0,011374	3.85189	1.94557	1
dod-20	B0554.6	B0554.6	0,047764	0,002172	21.9908	4.45883	1
B0554.7	B0554.7	B0554.7	0,002837	0,000218	13.0133	3.70191	1
B0563.1	B0563.1	B0563.1	0,025447	0,009361	2.71845	1.44278
tsp-11	B0563.2	B0563.2	0,133828	0,063164	2.11874	1.08321
tag-132	B0563.4	B0563.4	2,73994	1,56923	1.74604	0.804087
B0563.5	B0563.5	B0563.5	0,406048	0,577292	0.703367	-0.507651
B0563.6	B0563.6	B0563.6a	0,077246	0,034339	2.24952	1.16962
B0563.6	B0563.6	B0563.6b.1	0,141619	0,052951	2.67453	1.41928
B0563.6	B0563.6	B0563.6b.2	0,146176	0,04806	3.04153	1.6048
B0563.7	B0563.7	B0563.7	0,077977	0,057418	1.35805	0.441536
B0563.8	B0563.8	B0563.8	0,021532	0,087497	0.24609	-2.02274		1
B0563.9	B0563.9	B0563.9	0,313228	1,07548	0.291245	-1.7797		1
unc-30	B0564.10	B0564.10a	0,110435	0,087856	1.257	0.329985
unc-30	B0564.10	B0564.10b	0,119733	0,07777	1.53958	0.622535
B0564.11	B0564.11	B0564.11	0,62906	0,360914	1.74296	0.801543
B0564.1	B0564.1	B0564.1a	1,49711	1,02657	1.45836	0.544348
tin-9.2	B0564.1	B0564.1b.1	1,56037	1,0732	1.45394	0.539969
tin-9.2	B0564.1	B0564.1b.2	1,90818	2,91729	0.654093	-0.612432
B0564.2	B0564.2	B0564.2	0,515704	0,667563	0.772517	-0.372361
B0564.3	B0564.3	B0564.3.1	0,519391	0,43619	1.19074	0.251864
B0564.3	B0564.3	B0564.3.2	0,528168	0,440467	1.19911	0.261963
B0564.4	B0564.4	B0564.4	0,100464	0,103716	0.968645	-0.0459598
B0564.6	B0564.6	B0564.6a	nan	nan
B0564.6	B0564.6	B0564.6b	nan	nan
B0564.7	B0564.7	B0564.7.1	0,642107	0,315059	2.03805	1.02719
B0564.7	B0564.7	B0564.7.2	0,649499	0,31245	2.07873	1.0557
B0564.9	B0564.9	B0564.9	nan	nan
BE0003N10.1	BE0003N10.1	BE0003N10.1	0,229082	0,147438	1.55375	0.635756
BE0003N10.2	BE0003N10.2	BE0003N10.2	0,707087	0,422573	1.67329	0.742687
BE0003N10.3	BE0003N10.3	BE0003N10.3	0,110306	0,068195	1.61751	0.693773
BE10.1	BE10.1	BE10.1	0,00604	0,000734	8.22916	3.04074	1
BE10.2	BE10.2	BE10.2	0,370789	0,020306	18.2601	4.19062	1
BE10.3	BE10.3	BE10.3	0,013029	0,013805	0.943767	-0.0834977
BE10.4	BE10.4	BE10.4	0,016282	0,032645	0.498744	-1.00363
BE10.5	BE10.5	BE10.5	0,002701	0
C01A2.1	C01A2.1	C01A2.1	0,017644	0,012185	1.44799	0.534055
C01A2.2	C01A2.2	C01A2.2	0,295254	0,219507	1.34508	0.42769
C01A2.3	C01A2.3	C01A2.3	0,541512	0,255487	2.11953	1.08374
C01A2.4	C01A2.4	C01A2.4	2,46919	1,3089	1.88646	0.915683
C01A2.5	C01A2.5	C01A2.5	1,17559	0,800694	1.46821	0.554062
C01A2.6	C01A2.6	C01A2.6	0,055431	0,008777	6.31548	2.65889	1
nlp-38	C01A2.7	C01A2.7.1	0,295366	0,141426	2.08848	1.06246
nlp-38	C01A2.7	C01A2.7.2	0,35938	0,169269	2.12313	1.08619
drh-2	C01B10.1	C01B10.1	0,679207	0,225703	3.0093	1.58943
C01B10.10	C01B10.10	C01B10.10	0,06249	0,043466	1.43767	0.523736
C01B10.11	C01B10.11	C01B10.11	1,76059	0,469286	3.75164	1.90752	1
C01B10.3	C01B10.3	C01B10.3	0,483846	0,294572	1.64254	0.715928
C01B10.4	C01B10.4	C01B10.4	0,022663	0,007771	2.91633	1.54415
hil-7	C01B10.5	C01B10.5a	0,542668	3,03855	0.178594	-2.48524		1
hil-7	C01B10.5	C01B10.5b.1	0,551649	2,84951	0.193594	-2.36889		1
hil-7	C01B10.5	C01B10.5b.2	0,599083	3,12585	0.191654	-2.38342		1
hil-7	C01B10.5	C01B10.5c	0,560432	3,00473	0.186517	-2.42262		1
hil-7	C01B10.5	C01B10.5e	0,899159	3,22922	0.278445	-1.84454		1
C01B10.6	C01B10.6	C01B10.6a.1	7,58177	2,43324	3.11592	1.63966	1
C01B10.6	C01B10.6	C01B10.6a.2	7,59287	2,43205	3.122	1.64247	1
C01B10.6	C01B10.6	C01B10.6b	7,29078	2,53996	2.87043	1.52127
C01B10.7	C01B10.7	C01B10.7	0	0,006876	0
C01B10.8	C01B10.8	C01B10.8.1	1,07113	0,473996	2.25979	1.17619
C01B10.8	C01B10.8	C01B10.8.2	1,11243	0,430625	2.58329	1.36921
C01B10.9	C01B10.9	C01B10.9	0,671719	0,378287	1.77569	0.828377
sqt-2	C01B12.1	C01B12.1	8,71012	0,27767	31.3686	4.97125	1
C01B12.2	C01B12.2	C01B12.2	0,424228	0,233469	1.81706	0.861609
C01B12.3	C01B12.3	C01B12.3	0,123438	0,032445	3.80453	1.92772	1
C01B12.4	C01B12.4	C01B12.4	0,018734	0,016522	1.13385	0.181232
C01B12.5	C01B12.5	C01B12.5	0,017036	0,003569	4.77324	2.25497	1
C01B12.7	C01B12.7	C01B12.7	0,342287	0,195947	1.74683	0.804743
C01B12.8	C01B12.8	C01B12.8	2,5022	0,407276	6.14375	2.61912	1
str-257	C01B4.1	C01B4.1	nan	nan
str-76	C01B4.10	C01B4.10	nan	nan
str-258	C01B4.3	C01B4.3	nan	nan
srd-61	C01B4.5	C01B4.5	nan	nan
C01B4.6	C01B4.6	C01B4.6	nan	nan
C01B4.7	C01B4.7	C01B4.7	nan	nan
C01B4.8	C01B4.8	C01B4.8	nan	nan
C01B4.9	C01B4.9	C01B4.9	nan	nan
C01B7.1	C01B7.1	C01B7.1a.1	0,475888	0,237188	2.00637	1.00459
C01B7.1	C01B7.1	C01B7.1a.2	0,47784	0,24019	1.98943	0.992352
C01B7.1	C01B7.1	C01B7.1b	0,795155	0,42072	1.88999	0.918376
C01B7.3	C01B7.3	C01B7.3	0	0,000554	0
tag-117	C01B7.4	C01B7.4	0,464607	0,129743	3.58098	1.84035	1
C01B7.5	C01B7.5	C01B7.5	0,030554	0,032789	0.93184	-0.101846
rpm-1	C01B7.6	C01B7.6	0,145365	0,061987	2.34509	1.22964
C01B7.7	C01B7.7	C01B7.7	nan	nan
C01B9.1	C01B9.1	C01B9.1	0,01017	0,005575	1.82416	0.867233
clc-2	C01C10.1	C01C10.1	0,359726	0,184988	1.94459	0.959467
C01C10.2	C01C10.2	C01C10.2a	0,506737	0,365281	1.38725	0.47223
C01C10.2	C01C10.2	C01C10.2b	0,350896	0,331513	1.05847	0.0819781
acl-12	C01C10.3	C01C10.3	1,52854	0,625998	2.44176	1.28792
clc-5	C01C10.4	C01C10.4	0,467749	0,293691	1.59266	0.671436
nlp-1	C01C4.1	C01C4.1	0,773669	0,85913	0.900526	-0.15116
C01C4.2	C01C4.2	C01C4.2	0,001381	0,005473	0.252238	-1.98714		1
C01C4.3	C01C4.3	C01C4.3a	0,185087	0,149649	1.23681	0.306621
C01C4.3	C01C4.3	C01C4.3b	0,227354	0,177578	1.2803	0.356488
ark-1	C01C7.1	C01C7.1	0,690704	0,364156	1.89673	0.923511
C01F1.1	C01F1.1	C01F1.1	1,04834	0,67089	1.56261	0.643959
C01F1.2	C01F1.2	C01F1.2	0,715499	0,519426	1.37748	0.462032
C01F1.3	C01F1.3	C01F1.3a.1	0,591392	0,116574	5.0731	2.34287	1
C01F1.3	C01F1.3	C01F1.3a.2	0,593769	0,114559	5.18308	2.37381	1
C01F1.3	C01F1.3	C01F1.3b	0,698766	0,192981	3.62091	1.85635	1
C01F1.4	C01F1.4	C01F1.4	0,035227	0,019484	1.808	0.854396
C01F1.5	C01F1.5	C01F1.5	0,099034	0,003343	29.6243	4.88871	1
C01F1.6	C01F1.6	C01F1.6	1,11571	0,589238	1.89348	0.92104
C01F4.2	C01F4.2	C01F4.2a	0,156331	0,076778	2.03614	1.02584
C01F4.2	C01F4.2	C01F4.2b	0,097596	0,040429	2.414	1.27143
C01F6.1	C01F6.1	C01F6.1	1,07992	0,473469	2.28087	1.18958
C01F6.2	C01F6.2	C01F6.2	0,018547	0,009291	1.99619	0.997249
fem-3	C01F6.4	C01F6.4	0,47981	0,250473	1.91562	0.937808
aly-1	C01F6.5	C01F6.5	1,32892	1,66174	0.799716	-0.32244
tag-60	C01F6.6	C01F6.6a	3,25614	1,17715	2.76612	1.46786
tag-60	C01F6.6	C01F6.6b	2,33217	0,905309	2.5761	1.36519
tag-60	C01F6.6	C01F6.6c	2,94174	1,13141	2.60007	1.37855
tag-60	C01F6.6	C01F6.6d	2,82405	1,08451	2.60399	1.38072
tag-60	C01F6.6	C01F6.6e.1	3,48684	1,19474	2.91849	1.54522
tag-60	C01F6.6	C01F6.6e.2	3,37105	1,22593	2.74979	1.45932
tag-60	C01F6.6	C01F6.6e.3	3,12244	1,12782	2.76856	1.46914
tag-60	C01F6.6	C01F6.6e.4	3,25614	1,17715	2.76612	1.46786
tag-60	C01F6.6	C01F6.6e.5	3,40931	1,11149	3.06733	1.61698	1
icl-1	C01F6.8	C01F6.8a	2,99617	1,96073	1.52809	0.611729
icl-1	C01F6.8	C01F6.8b	2,69676	1,64463	1.63974	0.713464
C01F6.9	C01F6.9	C01F6.9	4,50681	13,5764	0.331959	-1.59092
C01G10.1	C01G10.1	C01G10.1	0,000333	0,000069	4.82671	2.27104	1
C01G10.10	C01G10.10	C01G10.10	0,173903	0,166327	1.04555	0.0642604
unc-76	C01G10.11	C01G10.11a.1	2,05413	1,1508	1.78496	0.83589
unc-76	C01G10.11	C01G10.11a.2	2,29365	1,02653	2.23437	1.15987
unc-76	C01G10.11	C01G10.11b.1	1,23421	0,675849	1.82616	0.868815
unc-76	C01G10.11	C01G10.11b.2	2,27928	1,00297	2.27253	1.1843
dnj-3	C01G10.12	C01G10.12	0,111785	0,153789	0.726873	-0.460226
C01G10.14	C01G10.14	C01G10.14	0	0
C01G10.15	C01G10.15	C01G10.15	0,179971	0,451917	0.398239	-1.32829
C01G10.16	C01G10.16	C01G10.16	0,030019	0,052718	0.569434	-0.8124
C01G10.17	C01G10.17	C01G10.17	0,104097	0,03824	2.7222	1.44477
srx-79	C01G10.2	C01G10.2	0	0
srx-78	C01G10.3	C01G10.3	0	0
C01G10.4	C01G10.4	C01G10.4	0,2511	0,060853	4.12634	2.04486	1
C01G10.5	C01G10.5	C01G10.5	0,19702	0,04224	4.6643	2.22166	1
C01G10.6	C01G10.6	C01G10.6	0,17237	0,335997	0.513011	-0.96294
C01G10.7	C01G10.7	C01G10.7	0,945549	0,554469	1.70532	0.770045
C01G10.8	C01G10.8	C01G10.8.1	6,01392	4,20304	1.43085	0.516872
C01G10.8	C01G10.8	C01G10.8.2	6,30908	3,94182	1.60055	0.678568
C01G10.9	C01G10.9	C01G10.9	0,811722	0,794662	1.02147	0.0306444
C01G12.1	C01G12.1	C01G12.1	0,182869	0,056323	3.24679	1.69901	1
nspb-8	C01G12.10	C01G12.10	0,03644	0,00287	12.6969	3.6664	1
nspb-9	C01G12.11	C01G12.11	0,037069	0,005889	6.29463	2.65412	1
C01G12.13	C01G12.13	C01G12.13	0	0
nspb-7	C01G12.2	C01G12.2	0,017357	0,001802	9.63213	3.26786	1
C01G12.3	C01G12.3	C01G12.3	0,193894	0,122583	1.58174	0.661509
C01G12.5	C01G12.5	C01G12.5	0,001003	0,002163	0.463736	-1.10863
nspb-10	C01G12.6	C01G12.6	0,02131	0,005079	4.19569	2.06891	1
C01G12.7	C01G12.7	C01G12.7	0,086481	0,035549	2.43272	1.28257
C01G12.8	C01G12.8	C01G12.8	0,014872	0,003807	3.90646	1.96586	1
C01G12.9	C01G12.9	C01G12.9	0,000638	0
tag-292	C01G5.2	C01G5.2	1,37668	0,661027	2.08264	1.05841
C01G5.3	C01G5.3	C01G5.3	0,004657	0,000229	20.3371	4.34604	1
C01G5.4	C01G5.4	C01G5.4	0,001735	0,000227	7.64427	2.93438	1
C01G5.5	C01G5.5	C01G5.5	0,592572	0,371529	1.59495	0.673516
C01G5.6	C01G5.6	C01G5.6	2,44057	1,40272	1.73988	0.798991
C01G5.7	C01G5.7	C01G5.7	0,005347	0,022112	0.241804	-2.04809		1
C01G5.8	C01G5.8	C01G5.8	0,334321	0,209395	1.5966	0.675007
C01G5.9	C01G5.9	C01G5.9	0,024553	0,008369	2.93385	1.5528
aqp-2	C01G6.1	C01G6.1a.1	10,9842	7,35585	1.49326	0.578466
aqp-2	C01G6.1	C01G6.1a.2	10,914	7,36651	1.48157	0.567127
aqp-2	C01G6.1	C01G6.1b.1	10,6292	7,11076	1.49481	0.579957
aqp-2	C01G6.1	C01G6.1b.2	13,2266	7,9773	1.65803	0.72947
C01G6.2	C01G6.2	C01G6.2	0,021861	0,064209	0.340469	-1.5544
C01G6.3	C01G6.3	C01G6.3	3,53571	3,10901	1.13725	0.185545
C01G6.4	C01G6.4	C01G6.4	2,66684	1,59747	1.66941	0.739342
C01G6.5	C01G6.5	C01G6.5	2,91749	1,60226	1.82086	0.864619
tag-165	C01G6.6	C01G6.6a.1	0,813135	0,600647	1.35377	0.436978
tag-165	C01G6.6	C01G6.6a.2	0,824853	0,580285	1.42146	0.507375
tag-165	C01G6.6	C01G6.6a.3	0,825462	0,582542	1.417	0.50284
tag-165	C01G6.6	C01G6.6b	0,961631	0,970673	0.990685	-0.013502
C01G6.7	C01G6.7	C01G6.7	0,489974	0,152606	3.21071	1.68289	1
cam-1	C01G6.8	C01G6.8a	1,63353	0,931943	1.75282	0.809679
cam-1	C01G6.8	C01G6.8b	1,63353	0,931943	1.75282	0.809679
cam-1	C01G6.8	C01G6.8c	1,63353	0,931943	1.75282	0.809679
C01G6.9	C01G6.9	C01G6.9	0,043524	0,036141	1.20427	0.268158
C01G8.1	C01G8.1	C01G8.1	6,04347	1,92329	3.14226	1.6518	1
cln-3.2	C01G8.2	C01G8.2.1	0,353829	0,224538	1.57581	0.656093
cln-3.2	C01G8.2	C01G8.2.2	0,374948	0,229208	1.63584	0.710033
dhs-1	C01G8.3	C01G8.3	1,3096	0,682544	1.9187	0.940132
dnj-4	C01G8.4	C01G8.4	0,332049	0,147296	2.2543	1.17268
erm-1	C01G8.5	C01G8.5a.1	5,95018	2,11725	2.81033	1.49074
erm-1	C01G8.5	C01G8.5a.2	5,95224	2,11781	2.81056	1.49086
erm-1	C01G8.5	C01G8.5b	6,00379	2,12625	2.82365	1.49756
C01G8.6	C01G8.6	C01G8.6	1,02582	0,436464	2.3503	1.23284
lss-4	C01G8.9	C01G8.9a	3,32802	1,69935	1.95841	0.969681
lss-4	C01G8.9	C01G8.9b	2,62815	1,21387	2.1651	1.11443
col-61	C01H6.1	C01H6.1	0,120028	0,003883	30.9112	4.95006	1
C01H6.2	C01H6.2	C01H6.2	0,057786	0,02348	2.46108	1.29929
C01H6.3	C01H6.3	C01H6.3	0,031949	0,045259	0.705915	-0.502434
C01H6.4	C01H6.4	C01H6.4	0,129661	0,059854	2.16629	1.11523
nhr-23	C01H6.5	C01H6.5a	0,92323	0,3374	2.73631	1.45223
nhr-23	C01H6.5	C01H6.5b.1	1,01687	0,337438	3.0135	1.59144
nhr-23	C01H6.5	C01H6.5b.2	1,10878	0,345484	3.20935	1.68228	1
nhr-23	C01H6.5	C01H6.5b.3	0,936712	0,3254	2.87865	1.52539
nhr-23	C01H6.5	C01H6.5c	1,21108	0,367619	3.29439	1.72001	1
nhr-23	C01H6.5	C01H6.5d	1,32308	0,396887	3.33364	1.7371	1
nhr-23	C01H6.5	C01H6.5e.1	0,936712	0,3254	2.87865	1.52539
nhr-23	C01H6.5	C01H6.5e.2	1,25988	0,396054	3.18108	1.66952	1
nhr-23	C01H6.5	C01H6.5f.1	1,10492	0,339823	3.25146	1.70109	1
nhr-23	C01H6.5	C01H6.5f.2	1,10542	0,339985	3.25138	1.70105	1
C01H6.6	C01H6.6	C01H6.6	0,125503	0,056892	2.20599	1.14142
tag-298	C01H6.7	C01H6.7	1,35536	0,813612	1.66586	0.736263
C01H6.8	C01H6.8	C01H6.8	0,112198	0,030119	3.72516	1.8973	1
C01H6.9	C01H6.9	C01H6.9	0,282951	0,19025	1.48726	0.572656
gst-33	C02A12.1	C02A12.1	0,013743	0,013272	1.03548	0.0503007
srbc-33	C02A12.10	C02A12.10	0	0
srbc-29	C02A12.2	C02A12.2	0	0
srbc-30	C02A12.3	C02A12.3	0	0
lys-7	C02A12.4	C02A12.4.1	3,95288	10,1073	0.391092	-1.35442
lys-7	C02A12.4	C02A12.4.2	3,95652	9,91703	0.398962	-1.32568
srbc-32	C02A12.5	C02A12.5	0	0,000447	0
srbc-36	C02A12.6	C02A12.6	0	0
C02A12.8	C02A12.8	C02A12.8	0,000226	0,00014	1.61711	0.693422
srbc-31	C02A12.9	C02A12.9	0	0
C02B10.1	C02B10.1	C02B10.1	3,36144	1,3246	2.5377	1.34352
C02B10.2	C02B10.2	C02B10.2	0,646368	1,9232	0.33609	-1.57308
C02B10.3	C02B10.3	C02B10.3.1	0,648991	0,409608	1.58442	0.663955
C02B10.3	C02B10.3	C02B10.3.2	1,26188	0,605709	2.08331	1.05888
C02B10.4	C02B10.4	C02B10.4.1	2,5673	2,56433	1.00116	0.00166996
C02B10.4	C02B10.4	C02B10.4.2	3,02787	2,85712	1.05976	0.0837416
C02B10.5	C02B10.5	C02B10.5.1	1,68219	0,915893	1.83667	0.87709
C02B10.5	C02B10.5	C02B10.5.2	1,84792	0,900715	2.05161	1.03676
C02B10.5	C02B10.5	C02B10.5.3	1,87052	0,918894	2.03562	1.02547
C02B10.6	C02B10.6	C02B10.6	0,007146	0
adt-1	C02B4.1	C02B4.1	0,125084	0,013553	9.22925	3.20621	1
nhr-17	C02B4.2	C02B4.2	0,285418	0,137002	2.08331	1.05888
C02B4.3	C02B4.3	C02B4.3	0,032195	0,161614	0.199209	-2.32765		1
C02B8.1	C02B8.1	C02B8.1.1	0,016047	0,023551	0.681394	-0.55344
C02B8.1	C02B8.1	C02B8.1.2	0,008283	0,032024	0.258658	-1.95088		1
C02B8.2	C02B8.2	C02B8.2	0	0
C02B8.3	C02B8.3	C02B8.3	0,142614	0,081777	1.74394	0.802349
hlh-8	C02B8.4	C02B8.4	0,168756	0,080696	2.09126	1.06437
C02B8.5	C02B8.5	C02B8.5	0,020167	0,003506	5.7522	2.52411	1
C02B8.6	C02B8.6	C02B8.6	0,322653	0,200182	1.6118	0.688671
C02B8.7	C02B8.7	C02B8.7	0,000928	0
tyr-1	C02C2.1	C02C2.1.1	0,482235	0,166426	2.89759	1.53486
tyr-1	C02C2.1	C02C2.1.2	0,495843	0,165266	3.00027	1.58509
cup-4	C02C2.3	C02C2.3	0,113057	0,092701	1.21959	0.286394
C02C2.4	C02C2.4	C02C2.4	0,019464	0,008356	2.32934	1.21992
C02C2.5	C02C2.5	C02C2.5	0,069092	0,034311	2.0137	1.00985
dyn-1	C02C6.1	C02C6.1a	2,07294	0,7784	2.66308	1.41309
dyn-1	C02C6.1	C02C6.1b	2,12924	0,79766	2.66936	1.41649
C02C6.2	C02C6.2	C02C6.2a	0,324598	0,224383	1.44662	0.532691
C02C6.2	C02C6.2	C02C6.2b	0,394713	0,217878	1.81162	0.857284
C02C6.3	C02C6.3	C02C6.3a	0,677401	0,532158	1.27293	0.348155
C02C6.3	C02C6.3	C02C6.3b	0,63423	0,561692	1.12914	0.175227
C02D4.1	C02D4.1	C02D4.1	0,045117	0,000626	72.0714	6.17136	1
ser-2	C02D4.2	C02D4.2a	0,105866	0,027828	3.8043	1.92763	1
ser-2	C02D4.2	C02D4.2b	0,106287	0,02811	3.78111	1.91881	1
ser-2	C02D4.2	C02D4.2c	0,091703	0,031725	2.89055	1.53135
ser-2	C02D4.2	C02D4.2d	0,09222	0,03322	2.77603	1.47302
ser-2	C02D4.2	C02D4.2e	0,10422	0,029788	3.49872	1.80683	1
ser-2	C02D4.2	C02D4.2f	0,088051	0,026343	3.34247	1.74091	1
C02D5.1	C02D5.1	C02D5.1	0,277174	0,01081	25.6405	4.68035	1
C02D5.2	C02D5.2	C02D5.2a	0,120729	0,08142	1.48279	0.568317
C02D5.2	C02D5.2	C02D5.2b	0,128881	0,035668	3.61335	1.85334	1
C02D5.3	C02D5.3	C02D5.3a	0,453593	0,271756	1.66912	0.739086
C02D5.3	C02D5.3	C02D5.3b	1,12634	0,626282	1.79846	0.846758
C02D5.3	C02D5.3	C02D5.3c	0,014892	0,012314	1.20931	0.27419
C02E11.1	C02E11.1	C02E11.1a.1	2,03774	0,928611	2.1944	1.13382
C02E11.1	C02E11.1	C02E11.1a.2	2,10299	0,951132	2.21104	1.14472
C02E11.1	C02E11.1	C02E11.1b	2,10222	0,951053	2.21041	1.14432
C02E7.1	C02E7.1	C02E7.1	0,00278	0,000161	17.265	4.10978	1
C02E7.10	C02E7.10	C02E7.10	0,001132	0,001835	0.617095	-0.696435
str-211	C02E7.13	C02E7.13	0,000402	0
srh-21	C02E7.2	C02E7.2	0,002904	0,002451	1.18485	0.244701
srh-20	C02E7.3	C02E7.3	0,00168	0
srh-22	C02E7.4	C02E7.4	0,000405	0,000375	1.07889	0.109545
srh-23	C02E7.5	C02E7.5	0,000379	0,00039	0.971687	-0.0414362
C02E7.6	C02E7.6	C02E7.6	26,4275	7,40962	3.56665	1.83457	1
C02E7.7	C02E7.7	C02E7.7	22,562	4,15987	5.42373	2.43928	1
C02E7.8	C02E7.8	C02E7.8	0,000469	0
str-205	C02E7.9	C02E7.9	0	0
tsp-17	C02F12.1	C02F12.1	0,019387	0,005297	3.65996	1.87183	1
C02F12.3	C02F12.3	C02F12.3.1	0,75033	0,860902	0.871563	-0.198324
C02F12.3	C02F12.3	C02F12.3.2	0,710668	0,770931	0.921831	-0.117426
tag-52	C02F12.4	C02F12.4	0,520484	0,374321	1.39048	0.475578
C02F12.5	C02F12.5	C02F12.5	0,266302	0,946237	0.281433	-1.82914		1
tag-278	C02F12.7	C02F12.7	0,276031	0,123569	2.23382	1.15951
C02F12.8	C02F12.8	C02F12.8	0,307606	0,140925	2.18276	1.12616
C02F12.9	C02F12.9	C02F12.9	0,011096	0,006131	1.80984	0.855858
ced-5	C02F4.1	C02F4.1	0,570511	0,214487	2.65989	1.41136
tax-6	C02F4.2	C02F4.2a	2,68622	1,27837	2.10129	1.07127
tax-6	C02F4.2	C02F4.2b	2,54671	1,19459	2.13187	1.09212
tax-6	C02F4.2	C02F4.2c	1,77912	1,12214	1.58547	0.664911
C02F4.3	C02F4.3	C02F4.3	0,005995	0,019033	0.314969	-1.66672
C02F4.4	C02F4.4	C02F4.4	0,400498	0,109079	3.67163	1.87642	1
C02F4.5	C02F4.5	C02F4.5	0,000926	0
knl-1	C02F5.1	C02F5.1	1,35527	0,695836	1.94769	0.961761
C02F5.10	C02F5.10	C02F5.10	0,051121	0,082148	0.622299	-0.684321
tsp-2	C02F5.11	C02F5.11	0,857435	0,172161	4.98043	2.31627	1
C02F5.12	C02F5.12	C02F5.12	0,29898	0,090764	3.29404	1.71986	1
C02F5.13	C02F5.13	C02F5.13	0,705869	0,49115	1.43718	0.523237
C02F5.14	C02F5.14	C02F5.14	0,354444	0,049016	7.23119	2.85423	1
C02F5.2	C02F5.2	C02F5.2	0,013602	0,01434	0.948529	-0.0762368
C02F5.3	C02F5.3	C02F5.3	2,56375	1,24364	2.06149	1.04369
C02F5.4	C02F5.4	C02F5.4	1,00669	0,627354	1.60466	0.682268
C02F5.5	C02F5.5	C02F5.5	0,173427	0,014531	11.935	3.57712	1
C02F5.6	C02F5.6	C02F5.6a	0,952757	0,414209	2.30018	1.20175
C02F5.6	C02F5.6	C02F5.6b	0,715494	0,315936	2.26468	1.17931
C02F5.7	C02F5.7	C02F5.7a.1	1,33026	0,705383	1.88587	0.91523
C02F5.7	C02F5.7	C02F5.7a.2	1,25632	0,626362	2.00574	1.00414
C02F5.7	C02F5.7	C02F5.7a.3	1,54547	0,717847	2.15292	1.1063
C02F5.7	C02F5.7	C02F5.7a.4	1,54451	0,717946	2.15129	1.1052
C02F5.7	C02F5.7	C02F5.7b.1	1,23247	0,723799	1.70278	0.767892
C02F5.7	C02F5.7	C02F5.7b.2	1,54161	0,725186	2.12581	1.08801
tsp-1	C02F5.8	C02F5.8	4,0644	0,229818	17.6853	4.14448	1
pbs-6	C02F5.9	C02F5.9.1	8,02256	3,90682	2.05348	1.03807
pbs-6	C02F5.9	C02F5.9.2	8,21342	4,07267	2.01672	1.01201
C02G6.1	C02G6.1	C02G6.1	0,014697	0,002623	5.60313	2.48623	1
C02G6.2	C02G6.2	C02G6.2	0,000318	0,000341	0.933935	-0.0986052
C02G6.3	C02G6.3	C02G6.3	0,049401	0,020927	2.36061	1.23916
C02H6.1	C02H6.1	C02H6.1	0,001514	0,000365	4.14888	2.05272	1
fbxa-105	C02H6.2	C02H6.2	0,154484	0,074811	2.06499	1.04614
C02H7.1	C02H7.1	C02H7.1	0,031044	0,01926	1.61185	0.688721
C02H7.2	C02H7.2	C02H7.2	0,015242	0,003857	3.9518	1.98251	1
aex-3	C02H7.3	C02H7.3a	0,209219	0,133758	1.56416	0.645389
aex-3	C02H7.3	C02H7.3b	0,224934	0,141522	1.58939	0.668475
C03A3.1	C03A3.1	C03A3.1a	0,149652	0,053242	2.81079	1.49097
C03A3.1	C03A3.1	C03A3.1b	0,157837	0,046005	3.43087	1.77857	1
C03A3.2	C03A3.2	C03A3.2.1	0,853781	0,649358	1.31481	0.394852
C03A3.2	C03A3.2	C03A3.2.2	0,90151	0,631173	1.42831	0.514308
C03A3.3	C03A3.3	C03A3.3	0,007869	0,000935	8.41572	3.07309	1
C03A7.1	C03A7.1	C03A7.1	0,014698	0,074972	0.196048	-2.35072		1
srt-65	C03A7.10	C03A7.10	0,000451	0
ugt-51	C03A7.11	C03A7.11	0,038673	0,068344	0.565861	-0.821481
C03A7.12	C03A7.12	C03A7.12	0,008233	0,036952	0.222802	-2.16617		1
C03A7.13	C03A7.13	C03A7.13	0,027664	0,073034	0.378778	-1.40057
abu-8	C03A7.14	C03A7.14	0,205989	0,020019	10.2897	3.36313	1
C03A7.2	C03A7.2	C03A7.2	0,017568	0,079505	0.220966	-2.1781		1
srw-140	C03A7.3	C03A7.3	0	0
pqn-5	C03A7.4	C03A7.4	0,032273	0
srx-38	C03A7.5	C03A7.5	0,000984	0
srx-39	C03A7.6	C03A7.6	0	0
abu-6	C03A7.7	C03A7.7	0,000855	0
abu-7	C03A7.8	C03A7.8	0,059367	0,004892	12.1356	3.60117	1
srt-64	C03A7.9	C03A7.9	0,002083	0,00041	5.07985	2.34479	1
C03B1.1	C03B1.1	C03B1.1	0	0
C03B1.10	C03B1.10	C03B1.10	0,016569	0,038885	0.426105	-1.23072
lmp-1	C03B1.12	C03B1.12.1	9,90447	6,55319	1.5114	0.595882
lmp-1	C03B1.12	C03B1.12.2	11,2761	7,51446	1.50059	0.585527
C03B1.13	C03B1.13	C03B1.13	0,060522	0,06318	0.957923	-0.0620178
C03B1.14	C03B1.14	C03B1.14	0,184277	0,137029	1.3448	0.427395
C03B1.15	C03B1.15	C03B1.15	0,003644	0
C03B1.2	C03B1.2	C03B1.2	0,01655	0,000998	16.5828	4.05161	1
C03B1.3	C03B1.3	C03B1.3	0,000547	0
C03B1.4	C03B1.4	C03B1.4	0	0,000611	0
C03B1.5	C03B1.5	C03B1.5	0,013271	0,007645	1.73591	0.795689
C03B1.6	C03B1.6	C03B1.6	0	0,002263	0
C03B1.7	C03B1.7	C03B1.7	0,053071	0,041724	1.27195	0.347041
C03B1.9	C03B1.9	C03B1.9	0	0
C03B8.1	C03B8.1	C03B8.1	0,02433	0,025299	0.961698	-0.056344
C03B8.2	C03B8.2	C03B8.2	0,114338	0,120275	0.950638	-0.0730318
C03B8.3	C03B8.3	C03B8.3	0,013076	0,009446	1.38432	0.469179
lin-13	C03B8.4	C03B8.4	1,82202	0,761811	2.3917	1.25803
kin-19	C03C10.1	C03C10.1.1	7,77915	4,34018	1.79236	0.841858
kin-19	C03C10.1	C03C10.1.2	7,75625	4,31712	1.79663	0.84529
kin-19	C03C10.1	C03C10.1.3	11,6794	5,30872	2.20004	1.13753
C03C10.2	C03C10.2	C03C10.2	0,003885	0,000319	12.1787	3.60629	1
rnr-2	C03C10.3	C03C10.3.1	12,9345	8,17585	1.58204	0.661784
rnr-2	C03C10.3	C03C10.3.2	13,089	8,25317	1.58594	0.665335
rnr-2	C03C10.3	C03C10.3.3	14,0291	8,72608	1.60772	0.685017
C03C10.4	C03C10.4	C03C10.4	1,85816	1,53079	1.21386	0.279598
C03C10.5	C03C10.5	C03C10.5	0,107725	0,256334	0.420252	-1.25067
C03C10.6	C03C10.6	C03C10.6	0,210146	0,077718	2.70396	1.43507
C03C10.7	C03C10.7	C03C10.7	0,004935	0,001399	3.52717	1.81851	1
C03C11.1	C03C11.1	C03C11.1	0,006694	0
fog-3	C03C11.2	C03C11.2	0,019302	0,01535	1.25748	0.330534
C03D6.1	C03D6.1	C03D6.1	0,165974	0,074076	2.24059	1.16388
cel-1	C03D6.3	C03D6.3a	0,700555	0,516071	1.35748	0.440929
cel-1	C03D6.3	C03D6.3b	0,838346	0,441479	1.89895	0.925201
npp-14	C03D6.4	C03D6.4	1,38288	0,784286	1.76323	0.818224
C03D6.5	C03D6.5	C03D6.5	2,12344	1,26522	1.67832	0.747015
C03D6.6	C03D6.6	C03D6.6	0,865208	1,13365	0.763206	-0.389856
rpl-24.2	C03D6.8	C03D6.8.1	4,33019	5,45812	0.793348	-0.333974
rpl-24.2	C03D6.8	C03D6.8.2	4,3217	5,5542	0.778096	-0.36198
C03E10.1	C03E10.1	C03E10.1	0	0
C03E10.3	C03E10.3	C03E10.3	0,036029	0,010624	3.39129	1.76184	1
gly-20	C03E10.4	C03E10.4	1,5921	0,847586	1.87839	0.909499
C03E10.5	C03E10.5	C03E10.5	0,186663	0,196761	0.948679	-0.0760083
C03E10.6	C03E10.6	C03E10.6	0,517892	1,38295	0.374484	-1.41703
C03F11.1	C03F11.1	C03F11.1	0,068467	0,028469	2.40497	1.26602
C03F11.2	C03F11.2	C03F11.2	0,033735	0,062111	0.543132	-0.880624
C03F11.3	C03F11.3	C03F11.3	0,905636	0,359776	2.51722	1.33183
C03F11.4	C03F11.4	C03F11.4.1	0,054216	0,067072	0.808328	-0.306987
C03F11.4	C03F11.4	C03F11.4.2	0,052589	0,06175	0.851652	-0.231664
C03F11.4	C03F11.4	C03F11.4.3	0,052585	0,062366	0.843165	-0.246114
sdha-1	C03G5.1	C03G5.1.1	2,99389	1,4836	2.01799	1.01292
sdha-1	C03G5.1	C03G5.1.2	2,99129	1,47915	2.0223	1.016
nspc-3	C03G5.10	C03G5.10	0,611117	0,619455	0.98654	-0.0195509
nspc-4	C03G5.11	C03G5.11	2,17532	7,54349	0.288371	-1.794		1
nspc-5	C03G5.12	C03G5.12	0,021954	0
nspc-6	C03G5.13	C03G5.13	nan	nan
nspc-7	C03G5.2	C03G5.2	0,134254	0,855707	0.156892	-2.67215		1
flp-5	C03G5.7	C03G5.7	1,23029	5,99543	0.205205	-2.28486		1
nspc-1	C03G5.8	C03G5.8	0,239527	1,38192	0.173329	-2.52841		1
nspc-2	C03G5.9	C03G5.9	nan	nan
nhr-148	C03G6.10	C03G6.10	0,006448	0,010338	0.623735	-0.680995
srh-231	C03G6.11	C03G6.11	0	0
nhr-149	C03G6.12	C03G6.12	0,001446	0,001009	1.43268	0.518712
tag-293	C03G6.13	C03G6.13	0,008173	0,006013	1.35923	0.442784
cyp-35A1	C03G6.14	C03G6.14	0,025401	0,000255	99.6122	6.63825	1
cyp-35A2	C03G6.15	C03G6.15	0,154261	0,098729	1.56247	0.643828
srsx-24	C03G6.16	C03G6.16	0,000573	0
C03G6.17	C03G6.17	C03G6.17	0,047213	0,066615	0.708738	-0.496675
srp-5	C03G6.18	C03G6.18	0	0,000637	0
srp-6	C03G6.19	C03G6.19	0,36518	0,10852	3.36509	1.75065	1
srx-56	C03G6.2	C03G6.2	0,00022	0
srj-14	C03G6.3	C03G6.3	0,03691	0,033537	1.10057	0.138246
C03G6.5	C03G6.5	C03G6.5	0,375108	1,11183	0.337379	-1.56756
C03G6.6	C03G6.6	C03G6.6	0,001254	0
srh-275	C03G6.7	C03G6.7	0,001187	0
nhr-147	C03G6.8	C03G6.8	0,022811	0,012664	1.80122	0.848978
srh-244	C03G6.9	C03G6.9	0,000391	0
C03H12.1	C03H12.1	C03H12.1	0,278993	0,160468	1.73862	0.797943
clec-10	C03H5.1	C03H5.1	0,062365	0,15947	0.391079	-1.35447
C03H5.2	C03H5.2	C03H5.2	1,46413	0,993689	1.47343	0.559177
C03H5.3	C03H5.3	C03H5.3	0,682331	0,743164	0.918143	-0.123209
C03H5.4	C03H5.4	C03H5.4	0,005932	0,002429	2.44214	1.28815
C03H5.5	C03H5.5	C03H5.5	0,051054	0,038535	1.32487	0.405846
C03H5.6	C03H5.6	C03H5.6	0,139302	0,067766	2.05563	1.03958
C03H5.7	C03H5.7	C03H5.7	0,016311	0,005158	3.16231	1.66098	1
C04A11.1	C04A11.1	C04A11.1	0,055884	0,025842	2.16251	1.11271
C04A11.2	C04A11.2	C04A11.2	0,167097	0,130403	1.28139	0.357709
gck-4	C04A11.3	C04A11.3	0,796085	0,399364	1.99338	0.995218
adm-2	C04A11.4	C04A11.4	0,809942	0,27972	2.89555	1.53384
C04A11.5	C04A11.5	C04A11.5	0,125526	0,236006	0.531876	-0.910837
C04A2.1	C04A2.1	C04A2.1.1	0,214314	0,189848	1.12887	0.174881
C04A2.1	C04A2.1	C04A2.1.2	0,179861	0,140226	1.28265	0.359129
egl-27	C04A2.3	C04A2.3a	3,5041	1,7729	1.97648	0.982933
egl-27	C04A2.3	C04A2.3b	3,4591	1,70668	2.0268	1.0192
egl-27	C04A2.3	C04A2.3c.1	5,35668	2,52779	2.11912	1.08346
egl-27	C04A2.3	C04A2.3c.2	5,63475	2,46279	2.28795	1.19406
egl-27	C04A2.3	C04A2.3c.3	5,63801	2,46297	2.28911	1.19479
dnj-5	C04A2.7	C04A2.7a	3,46464	1,62266	2.13516	1.09434
dnj-5	C04A2.7	C04A2.7b.1	3,47195	1,68938	2.05516	1.03925
dnj-5	C04A2.7	C04A2.7b.2	2,96852	1,4203	2.09007	1.06355
dnj-5	C04A2.7	C04A2.7c	3,46642	1,60636	2.15793	1.10965
dnj-5	C04A2.7	C04A2.7d	3,64316	1,75437	2.07662	1.05424
C04B4.1	C04B4.1	C04B4.1	0,001212	0,000208	5.82683	2.54271	1
C04B4.2	C04B4.2	C04B4.2	1,195	0,480261	2.48823	1.31512
C04B4.3	C04B4.3	C04B4.3	0	0
C04B4.4	C04B4.4	C04B4.4	0	0,000212	0
C04B4.5	C04B4.5	C04B4.5	0	0
C04B4.6	C04B4.6	C04B4.6	0	0
C04C11.1	C04C11.1	C04C11.1b	0,587572
C04C11.2	C04C11.2	C04C11.2.1	1,091	0,691092	1.57866	0.658701
C04C11.2	C04C11.2	C04C11.2.2	1,18638	0,75806	1.56502	0.646182
srz-60	C04C3.1	C04C3.1	0,004574	0,006245	0.73242	-0.449258
C04C3.2	C04C3.2	C04C3.2	0,008464	0,004634	1.82649	0.869076
C04C3.3	C04C3.3	C04C3.3.1	3,55397	1,51883	2.33994	1.22647
C04C3.3	C04C3.3	C04C3.3.2	3,74166	1,48653	2.51704	1.33173
C04C3.4	C04C3.4	C04C3.4	0	0
dyf-3	C04C3.5	C04C3.5a	0,044984	0,055249	0.814203	-0.29654
dyf-3	C04C3.5	C04C3.5b	0,052916	0,05246	1.00869	0.0124807
dyf-3	C04C3.5	C04C3.5c	0,040655	0,049017	0.829412	-0.269839
C04C3.6	C04C3.6	C04C3.6	0,006503	0,006659	0.976575	-0.0341979
C04C3.7	C04C3.7	C04C3.7	0	0
C04D8.1	C04D8.1	C04D8.1	1,38868	0,739947	1.87673	0.90822
C04E12.10	C04E12.10	C04E12.10	0	0
C04E12.11	C04E12.11	C04E12.11	0,013862	0,021015	0.659615	-0.600305
C04E12.12	C04E12.12	C04E12.12	0,043081	0,024886	1.73112	0.791704
C04E12.2	C04E12.2	C04E12.2.1	0,132082	0,058393	2.26195	1.17757
C04E12.2	C04E12.2	C04E12.2.2	0,130285	0,031461	4.14116	2.05003	1
C04E12.4	C04E12.4	C04E12.4	0,075925	0,060021	1.26498	0.339115
C04E12.5	C04E12.5	C04E12.5	0,006247	0,000966	6.4667	2.69303	1
C04E12.6	C04E12.6	C04E12.6	0,001396	0
plsc-1	C04E12.7	C04E12.7	0,078626	0,02271	3.46218	1.79168	1
srx-121	C04E12.8	C04E12.8	0,001651	0
srbc-2	C04E12.9	C04E12.9	0	0
srd-15	C04E6.10	C04E6.10	0,000073	0,00036	0.203552	-2.29653		1
C04E6.11	C04E6.11	C04E6.11	0,364109	0,150753	2.41527	1.27218
C04E6.12	C04E6.12	C04E6.12	0,041031	0,013275	3.09084	1.628	1
C04E6.13	C04E6.13	C04E6.13	0,472331	1,08186	0.436592	-1.19564
srsx-18	C04E6.2	C04E6.2	0,000448	0,000829	0.540229	-0.888356
C04E6.3	C04E6.3	C04E6.3	0,000622	0
C04E6.4	C04E6.4	C04E6.4	0,000674	0
C04E6.5	C04E6.5	C04E6.5	0,00039	0,000373	1.04446	0.0627551
grd-9	C04E6.6	C04E6.6	0,002114	0
C04E6.7	C04E6.7	C04E6.7	0,084296	0,057909	1.45566	0.54167
C04E6.8	C04E6.8	C04E6.8	0,078622	0,031151	2.52389	1.33565
srd-16	C04E6.9	C04E6.9	0	0
C04E7.1	C04E7.1	C04E7.1	0,004309	0
C04E7.2	C04E7.2	C04E7.2	0,244339	0,161104	1.51665	0.600892
C04E7.3	C04E7.3	C04E7.3	0,060748	0,065589	0.9262	-0.110605
C04E7.4	C04E7.4	C04E7.4	0,068097	0,0621	1.09657	0.133002
C04F1.1	C04F1.1	C04F1.1	0,043904	0,004464	9.83513	3.29794	1
lim-7	C04F1.3	C04F1.3	0,241961	0,092355	2.6199	1.38951
C04F12.1	C04F12.1	C04F12.1	1,07771	0,439522	2.452	1.29396
fce-1	C04F12.10	C04F12.10	1,8432	1,0522	1.75176	0.808804
ikb-1	C04F12.3	C04F12.3	0,43983	0,214166	2.05369	1.03822
rpl-14	C04F12.4	C04F12.4.1	76,6431	106,831	0.717424	-0.479103
rpl-14	C04F12.4	C04F12.4.2	74,3007	101,475	0.732207	-0.449677
C04F12.5	C04F12.5	C04F12.5	0,711904	1,80199	0.395065	-1.33984
C04F12.6	C04F12.6	C04F12.6	0	0
C04F12.7	C04F12.7	C04F12.7	0,056074	0,020472	2.73905	1.45367
C04F12.8	C04F12.8	C04F12.8	0,626292	0,376802	1.66212	0.733029
rnh-1.3	C04F12.9	C04F12.9	0,431906	0,787827	0.548224	-0.867162
srh-79	C04F2.1	C04F2.1	0,000359	0
srh-229	C04F2.4	C04F2.4	0,003969	0
sid-1	C04F5.1	C04F5.1	0,492866	0,233938	2.10682	1.07507
C04F5.2	C04F5.2	C04F5.2	0,00579	0,001579	3.66671	1.87449	1
unc-46	C04F5.3	C04F5.3	0,011529	0,012535	0.919705	-0.120757
srab-1	C04F5.4	C04F5.4	0,000381	0
srab-2	C04F5.5	C04F5.5	0	0
srab-3	C04F5.6	C04F5.6	0	0
ugt-63	C04F5.7	C04F5.7	0,025471	0,01895	1.34411	0.426646
C04F5.8	C04F5.8	C04F5.8	1,55948	1,11827	1.39455	0.479796
C04F5.9	C04F5.9	C04F5.9	0,303421	0,188461	1.60999	0.687055
vit-5	C04F6.1	C04F6.1.1	34,2013	114,193	0.299504	-1.73935		1
vit-5	C04F6.1	C04F6.1.2	34,2951	114,508	0.2995	-1.73937		1
vit-5	C04F6.1	C04F6.1.3	34,2479	114,35	0.299501	-1.73937		1
C04F6.2	C04F6.2	C04F6.2	0,071371	0,041163	1.73385	0.793982
cht-1	C04F6.3	C04F6.3.1	2,84554	2,43475	1.16872	0.224929
cht-1	C04F6.3	C04F6.3.2	2,93598	2,41737	1.21453	0.280404
unc-78	C04F6.4	C04F6.4a	1,09024	0,474727	2.29656	1.19948
unc-78	C04F6.4	C04F6.4b.1	1,0749	0,485841	2.21245	1.14565
unc-78	C04F6.4	C04F6.4b.2	0,970542	0,441391	2.19883	1.13673
dhs-27	C04F6.5	C04F6.5	0,302102	0,183688	1.64465	0.717778
C04G2.1	C04G2.1	C04G2.1	0,156839	0,140092	1.11954	0.16291
C04G2.10	C04G2.10	C04G2.10	0,41846	0,400776	1.04412	0.0622936
C04G2.11	C04G2.11	C04G2.11	0,00021	0,000388	0.540137	-0.888604
C04G2.2	C04G2.2	C04G2.2	0,014958	0,001564	9.56368	3.25757	1
msp-36	C04G2.4	C04G2.4	0,332922	0,177089	1.87997	0.91071
C04G2.5	C04G2.5	C04G2.5	0,001114	0
dis-3	C04G2.6	C04G2.6	0,971946	0,415449	2.33951	1.2262
egl-38	C04G2.7	C04G2.7	0,259916	0,114949	2.26114	1.17705
C04G2.8	C04G2.8	C04G2.8	0,120797	0,012091	9.99065	3.32058	1
C04G2.9	C04G2.9	C04G2.9	0,121412	0,01169	10.386	3.37656	1
C04G6.10	C04G6.10	C04G6.10	0,021913	0,001842	11.8961	3.57242	1
C04G6.11	C04G6.11	C04G6.11	0	0
mpk-2	C04G6.1	C04G6.1a	0,198942	0,060541	3.28607	1.71636	1
mpk-2	C04G6.1	C04G6.1b	0,235578	0,073822	3.19116	1.67408	1
mpk-2	C04G6.1	C04G6.1c.1	0,205857	0,062014	3.31952	1.73098	1
mpk-2	C04G6.1	C04G6.1c.2	0,205138	0,063027	3.25476	1.70255	1
C04G6.2	C04G6.2	C04G6.2	0,132469	0,033285	3.97984	1.99271	1
pld-1	C04G6.3	C04G6.3.1	1,16915	0,474077	2.46616	1.30227
pld-1	C04G6.3	C04G6.3.2	1,18778	0,478672	2.48141	1.31116
C04G6.4	C04G6.4	C04G6.4	0,581309	0,323237	1.7984	0.846713
C04G6.5	C04G6.5	C04G6.5	0,90151	0,784013	1.14987	0.201466
C04G6.6	C04G6.6	C04G6.6	0,006123	0,017398	0.351927	-1.50665
C04G6.7	C04G6.7	C04G6.7	0,049213	0,009073	5.42412	2.43939	1
C04H4.1	C04H4.1	C04H4.1	0,049316	0,033037	1.49276	0.577985
C04H5.1	C04H5.1	C04H5.1	0,548689	1,95611	0.2805	-1.83393		1
C04H5.2	C04H5.2	C04H5.2	1,19757	1,22594	0.976859	-0.0337784
gcy-29	C04H5.3	C04H5.3	0,007008	0,002289	3.06175	1.61436	1
mog-4	C04H5.6	C04H5.6	0,752638	0,417079	1.80455	0.851635
C04H5.7	C04H5.7	C04H5.7	1,21861	3,01826	0.403746	-1.30848
nlp-41	C04H5.8	C04H5.8	0,425428	0,718082	0.59245	-0.755234
pph-1	C05A2.1	C05A2.1	0,459315	0,393532	1.16716	0.223003
pgp-5	C05A9.1	C05A9.1	0,375319	0,051698	7.25984	2.85994	1
C05A9.2	C05A9.2	C05A9.2	0,494974	0,560481	0.883124	-0.179313
C05A9.3	C05A9.3	C05A9.3	0,048802	0,006136	7.95337	2.99157	1
lip-1	C05B10.1	C05B10.1	1,24975	0,594322	2.10282	1.07232
C05B5.1	C05B5.1	C05B5.1	0,007367	0,007193	1.02424	0.03456
C05B5.2	C05B5.2	C05B5.2	0,039441	0,005094	7.74258	2.95281	1
pqn-8	C05B5.3	C05B5.3	0,021558	0,026273	0.820546	-0.285344
C05B5.4	C05B5.4	C05B5.4	0,179506	0,13527	1.32702	0.40819
C05B5.5	C05B5.5	C05B5.5	0,020661	0,01027	2.01178	1.00847
C05B5.6	C05B5.6	C05B5.6	0,007961	0,000534	14.9091	3.89812	1
rgs-1	C05B5.7	C05B5.7	0,105355	0,070275	1.49918	0.584175
C05B5.8	C05B5.8	C05B5.8	0,932338	0,627008	1.48696	0.572369
C05B5.9	C05B5.9	C05B5.9	0,063419	0,043103	1.47132	0.557115
C05C10.1	C05C10.1	C05C10.1	0,005477	0,005773	0.948713	-0.0759564
C05C10.2	C05C10.2	C05C10.2a	0,936863	0,440016	2.12916	1.09028
C05C10.2	C05C10.2	C05C10.2b.1	0,960482	0,447217	2.14769	1.10278
C05C10.2	C05C10.2	C05C10.2b.2	0,96052	0,444101	2.16284	1.11293
C05C10.3	C05C10.3	C05C10.3.1	1,3761	0,705705	1.94996	0.963448
C05C10.3	C05C10.3	C05C10.3.2	1,87155	0,745448	2.51064	1.32805
C05C10.3	C05C10.3	C05C10.3.3	1,83953	0,738233	2.4918	1.31719
C05C10.4	C05C10.4	C05C10.4	0,604407	0,968918	0.623796	-0.680854
C05C10.5	C05C10.5	C05C10.5a	4,47709	2,85929	1.5658	0.646904
C05C10.5	C05C10.5	C05C10.5b	5,66776	3,20077	1.77075	0.82436
C05C10.5	C05C10.5	C05C10.5c.1	5,71783	3,11805	1.83378	0.874824
C05C10.5	C05C10.5	C05C10.5c.2	5,72892	3,10423	1.84552	0.884028
C05C10.5	C05C10.5	C05C10.5c.3	5,19206	2,70148	1.92193	0.942557
ufd-3	C05C10.6	C05C10.6a	3,10574	1,10755	2.80415	1.48757
ufd-3	C05C10.6	C05C10.6b	3,17712	1,15114	2.75998	1.46466
C05C10.7	C05C10.7	C05C10.7	0,514635	0,411513	1.25059	0.322612
C05C12.1	C05C12.1	C05C12.1	0,011857	0,002815	4.21194	2.07448	1
gtl-1	C05C12.3	C05C12.3	0,237168	0,20523	1.15562	0.208668
C05C12.4	C05C12.4	C05C12.4	0,432245	0,284397	1.51986	0.603943
C05C12.5	C05C12.5	C05C12.5	0,013112	0,017986	0.729	-0.456009
C05C12.6	C05C12.6	C05C12.6	0,072213	0,046078	1.56719	0.648178
C05C8.1	C05C8.1	C05C8.1	0,85711	0,368252	2.32751	1.21879
C05C8.2	C05C8.2	C05C8.2	0,968665	0,567824	1.70592	0.770554
fkb-3	C05C8.3	C05C8.3	1,27928	0,496212	2.57809	1.3663
gei-6	C05C8.4	C05C8.4	0,641152	0,454785	1.40979	0.495482
C05C8.5	C05C8.5	C05C8.5	0,621008	0,510855	1.21562	0.281698
C05C8.6	C05C8.6	C05C8.6	1,71745	0,767875	2.23663	1.16132
C05C8.7	C05C8.7	C05C8.7.1	0,85232	0,512718	1.66236	0.73323
C05C8.7	C05C8.7	C05C8.7.2	1,00515	0,432361	2.32479	1.2171
C05C8.7	C05C8.7	C05C8.7.3	0,99586	0,543703	1.83162	0.873124
C05C8.7	C05C8.7	C05C8.7.4	0,993175	0,479515	2.07121	1.05047
C05C8.8	C05C8.8	C05C8.8	0,00434	0,014208	0.305493	-1.71079		1
C05C8.9	C05C8.9	C05C8.9a	0,689936	0,558461	1.23542	0.305006
C05C8.9	C05C8.9	C05C8.9b.1	0,634744	0,537224	1.18153	0.240651
C05C8.9	C05C8.9	C05C8.9b.2	0,662893	0,520987	1.27238	0.347529
C05C9.1	C05C9.1	C05C9.1	0,038152	0,004763	8.01004	3.00181	1
C05C9.2	C05C9.2	C05C9.2	0,009929	0,001169	8.49317	3.0863	1
C05C9.3	C05C9.3	C05C9.3	0,016247	0,004737	3.4297	1.77808	1
C05D10.1	C05D10.1	C05D10.1a.1	1,25045	0,710076	1.76101	0.816402
C05D10.1	C05D10.1	C05D10.1a.2	1,46774	0,749129	1.95926	0.97031
C05D10.1	C05D10.1	C05D10.1b	1,5417	0,773494	1.99316	0.99506
C05D10.1	C05D10.1	C05D10.1c.1	1,40937	0,717839	1.96335	0.973318
C05D10.1	C05D10.1	C05D10.1c.2	1,43127	0,703585	2.03425	1.0245
C05D10.1	C05D10.1	C05D10.1c.3	1,46774	0,749129	1.95926	0.97031
C05D10.1	C05D10.1	C05D10.1c.4	1,40943	0,717902	1.96326	0.973253
C05D10.2	C05D10.2	C05D10.2a	0,089088	0,042697	2.08651	1.06109
C05D10.2	C05D10.2	C05D10.2b	0,051211	0,002478	20.6664	4.36922	1
C05D10.2	C05D10.2	C05D10.2c	0,089444	0,041818	2.13888	1.09686
C05D10.3	C05D10.3	C05D10.3	0,064301	0,029135	2.20699	1.14208
C05D10.4	C05D10.4	C05D10.4a	0,506449	0,206659	2.45065	1.29316
C05D10.4	C05D10.4	C05D10.4b	0,460498	0,188142	2.44761	1.29137
C05D10.4	C05D10.4	C05D10.4c	0,598787	0,213238	2.80807	1.48958
C05D11.1	C05D11.1	C05D11.1	2,34199	0,864136	2.71021	1.4384
C05D11.10	C05D11.10	C05D11.10	1,54308	1,499	1.02941	0.0418125
mel-32	C05D11.11	C05D11.11a.1	9,21103	3,96766	2.32153	1.21507
mel-32	C05D11.11	C05D11.11a.2	9,21587	3,96668	2.32332	1.21619
mel-32	C05D11.11	C05D11.11a.3	9,00447	3,95512	2.27666	1.18692
mel-32	C05D11.11	C05D11.11b.1	8,40137	3,80299	2.20915	1.14349
mel-32	C05D11.11	C05D11.11b.2	8,46007	3,80643	2.22257	1.15223
mel-32	C05D11.11	C05D11.11b.3	9,00447	3,95512	2.27666	1.18692
let-721	C05D11.12	C05D11.12.1	2,31906	1,12778	2.05631	1.04005
let-721	C05D11.12	C05D11.12.2	2,37494	1,06445	2.23114	1.15778
C05D11.13	C05D11.13	C05D11.13	0,187827	0,208194	0.902173	-0.148524
vps-16	C05D11.2	C05D11.2.1	1,02918	0,479564	2.14607	1.1017
vps-16	C05D11.2	C05D11.2.2	1,0349	0,479025	2.16043	1.11132
tag-170	C05D11.3	C05D11.3	2,47769	1,11188	2.22838	1.15599
let-756	C05D11.4	C05D11.4	0,348962	0,25683	1.35873	0.442256
C05D11.5	C05D11.5	C05D11.5	0,163688	0,088361	1.85249	0.889467
nas-4	C05D11.6	C05D11.6	0,054882	0,006307	8.70176	3.12131	1
C05D11.7	C05D11.7	C05D11.7a.1	2,52528	0,924439	2.73169	1.44979
C05D11.7	C05D11.7	C05D11.7a.2	2,96136	0,892383	3.31849	1.73052	1
C05D11.7	C05D11.7	C05D11.7b	2,57064	0,863414	2.9773	1.574
C05D11.8	C05D11.8	C05D11.8	0,39062	0,160686	2.43095	1.28152
C05D11.9	C05D11.9	C05D11.9	0,441696	0,233369	1.89269	0.920441
C05D12.1	C05D12.1	C05D12.1	0,163313	0,026033	6.27331	2.64923	1
C05D12.2	C05D12.2	C05D12.2	0,074899	0,067701	1.10632	0.145771
C05D12.3	C05D12.3	C05D12.3a.1	0,364192	0,030968	11.7603	3.55585	1
C05D12.3	C05D12.3	C05D12.3a.2	0,397509	0,032868	12.0941	3.59623	1
C05D12.3	C05D12.3	C05D12.3c	0,394771	0,033321	11.8475	3.56651	1
C05D12.4	C05D12.4	C05D12.4	0,046533	0,030098	1.54606	0.628599
C05D12.5	C05D12.5	C05D12.5	0,032176	0,010872	2.95956	1.56538
C05D12.7	C05D12.7	C05D12.7	0,195838	0,224223	0.873407	-0.195274
C05D2.10	C05D2.10	C05D2.10a.1	2,51881	1,08285	2.32609	1.21791
C05D2.10	C05D2.10	C05D2.10a.2	2,58963	1,21776	2.12655	1.08852
C05D2.10	C05D2.10	C05D2.10b	2,58006	1,20177	2.14688	1.10224
daf-4	C05D2.1	C05D2.1a	0,512695	0,498618	1.02823	0.0401659
daf-4	C05D2.1	C05D2.1c	0,522227	0,334313	1.56209	0.643478
daf-4	C05D2.1	C05D2.1d	0,468119	0,326742	1.43269	0.518723
C05D2.3	C05D2.3	C05D2.3	0,004524	0,002243	2.01691	1.01215
bas-1	C05D2.4	C05D2.4a	0,210556	0,111328	1.89131	0.919387
bas-1	C05D2.4	C05D2.4b	0,207352	0,104704	1.98036	0.985765
gak-1	C05D2.5	C05D2.5	1,38114	0,803091	1.71978	0.782224
C05D2.6	C05D2.6	C05D2.6a.1	0,903441	0,560715	1.61123	0.688163
C05D2.6	C05D2.6	C05D2.6a.2	0,981038	0,511682	1.91728	0.939062
C05D2.6	C05D2.6	C05D2.6b	1,01766	0,489679	2.07822	1.05535
C05D2.8	C05D2.8	C05D2.8	0,672561	0,6467	1.03999	0.0565685
snx-1	C05D9.1	C05D9.1.1	2,26921	0,958461	2.36756	1.2434
snx-1	C05D9.1	C05D9.1.2	2,30477	0,959627	2.40174	1.26408
lmp-2	C05D9.2	C05D9.2.1	0,730275	0,235478	3.10125	1.63285	1
lmp-2	C05D9.2	C05D9.2.2	0,459226	0,158416	2.89886	1.53549
C05D9.3	C05D9.3	C05D9.3	0,282428	0,187035	1.51003	0.594575
C05D9.4	C05D9.4	C05D9.4	0,004993	0,003699	1.34973	0.432673
ife-4	C05D9.5	C05D9.5	0,230995	0,255989	0.902363	-0.14822
C05D9.7	C05D9.7	C05D9.7	0,481095	0,227518	2.11454	1.08034
C05D9.9	C05D9.9	C05D9.9a	0,452583	0,674903	0.67059	-0.576498
C05D9.9	C05D9.9	C05D9.9b	0,417122	0,458575	0.909605	-0.136688
C05E11.1	C05E11.1	C05E11.1	1,12036	0,790009	1.41816	0.504021
C05E11.2	C05E11.2	C05E11.2	0	0
C05E11.3	C05E11.3	C05E11.3	0,337231	0,130098	2.59213	1.37414
amt-1	C05E11.4	C05E11.4	0,012848	0,010871	1.18182	0.241014
amt-4	C05E11.5	C05E11.5	0,197481	0,139503	1.4156	0.501418
C05E11.6	C05E11.6	C05E11.6	0,202907	0,150352	1.34955	0.432475
C05E11.7	C05E11.7	C05E11.7	0,00283	0,000335	8.44687	3.07842	1
flp-12	C05E11.8	C05E11.8	1,75582	1,76694	0.993707	-0.0091081
srp-2	C05E4.1	C05E4.1.1	0,281854	0,242234	1.16356	0.218547
srp-2	C05E4.1	C05E4.1.2	0,289134	0,236391	1.22312	0.290563
srj-25	C05E4.10	C05E4.10	0	0
srj-24	C05E4.11	C05E4.11	0,000288	0,00047	0.613377	-0.705155
C05E4.12	C05E4.12	C05E4.12	0,023435	0,005297	4.42426	2.14544	1
str-262	C05E4.13	C05E4.13	0	0,000948	0
srh-2	C05E4.14	C05E4.14a	0,015319	0,126036	0.121541	-3.04049		1
srh-2	C05E4.14	C05E4.14b	0,011915	0,09978	0.119411	-3.066		1
str-20	C05E4.2	C05E4.2	0	0
srp-1	C05E4.3	C05E4.3	0,110977	0,44613	0.248755	-2.0072		1
sri-4	C05E4.4	C05E4.4	0	0,000331	0
str-134	C05E4.6	C05E4.6	0	0
C05E4.7	C05E4.7	C05E4.7	0,00068	0,001259	0.540166	-0.888525
gei-7	C05E4.9	C05E4.9a.1	7,13482	15,4946	0.460471	-1.11882
gei-7	C05E4.9	C05E4.9a.2	7,38869	16,0782	0.459547	-1.12172
gei-7	C05E4.9	C05E4.9a.3	7,3231	15,9468	0.459221	-1.12274
gei-7	C05E4.9	C05E4.9b.1	7,09038	15,4459	0.459046	-1.12329
gei-7	C05E4.9	C05E4.9b.2	7,18811	15,5804	0.461356	-1.11605
C05E7.1	C05E7.1	C05E7.1	0,241867	0,076293	3.17024	1.66459	1
C05E7.2	C05E7.2	C05E7.2	0,081156	0,032667	2.48433	1.31285
C05E7.3	C05E7.3	C05E7.3	0,062537	0,141039	0.443399	-1.17332
C05E7.4	C05E7.4	C05E7.4	0,006407	0,005853	1.09473	0.130572
C05G5.1	C05G5.1	C05G5.1	0,203766	0,089157	2.28547	1.19249
C05G5.2	C05G5.2	C05G5.2	0,476885	0,315138	1.51326	0.597658
C05G5.3	C05G5.3	C05G5.3	0,074286	0,118002	0.629535	-0.667641
C05G5.4	C05G5.4	C05G5.4	2,54683	2,49124	1.02231	0.0318386
C05G5.5	C05G5.5	C05G5.5	0,056912	0,054341	1.04732	0.0667019
nhr-76	C05G6.1	C05G6.1	0,251885	0,186968	1.34721	0.429974
ckk-1	C05H8.1	C05H8.1a	0,1169	0,091425	1.27864	0.354614
ckk-1	C05H8.1	C05H8.1b	0,130274	0,108922	1.19603	0.258254
cdc-48.1	C06A1.1	C06A1.1.1	11,0969	3,5387	3.13587	1.64887	1
cdc-48.1	C06A1.1	C06A1.1.2	11,1676	3,53928	3.15533	1.65779	1
C06A1.2	C06A1.2	C06A1.2	0,136674	0,257567	0.530635	-0.914209
C06A1.3	C06A1.3	C06A1.3	0,027202	0,021698	1.25366	0.326145
C06A1.5	C06A1.5	C06A1.5	4,42477	4,06231	1.08923	0.123302
C06A1.6	C06A1.6	C06A1.6	0,002986	0,003038	0.983038	-0.0246806
C06A1.7	C06A1.7	C06A1.7	0,002785	0
C06A12.3	C06A12.3	C06A12.3	0,440158	1,26081	0.349107	-1.51826
gcy-27	C06A12.4	C06A12.4	0,001499	0,000689	2.17569	1.12147
C06A12.5	C06A12.5	C06A12.5	0,003467	0,002077	1.66911	0.739078
C06A12.8	C06A12.8	C06A12.8	0	0,00139	0
C06A5.1	C06A5.1	C06A5.1	0,374396	0,199384	1.87776	0.909015
C06A5.10	C06A5.10	C06A5.10	nan	nan
sir-2.4	C06A5.11	C06A5.11	0,353322	0,270131	1.30797	0.387324
C06A5.12	C06A5.12	C06A5.12	0,099369	0,17025	0.583668	-0.776781
C06A5.2	C06A5.2	C06A5.2	0,003961	0,000891	4.44611	2.15254	1
C06A5.3	C06A5.3	C06A5.3a	0,933683	0,427167	2.18576	1.12813
C06A5.3	C06A5.3	C06A5.3b	0,963683	0,440241	2.18899	1.13027
C06A5.4	C06A5.4	C06A5.4	0,051451	0,044189	1.16433	0.219501
C06A5.5	C06A5.5	C06A5.5	nan	nan
C06A5.6	C06A5.6	C06A5.6	1,03104	0,456755	2.25732	1.17461
tmd-1	C06A5.7	C06A5.7a	1,24874	0,741594	1.68386	0.751772
tmd-1	C06A5.7	C06A5.7b	1,71328	0,780722	2.19448	1.13388
C06A5.8	C06A5.8	C06A5.8a	0,694862	0,352871	1.96917	0.977586
C06A5.8	C06A5.8	C06A5.8b	0,7082	0,329875	2.14687	1.10224
rnf-1	C06A5.9	C06A5.9	0,655871	0,41526	1.57942	0.659397
C06A6.2	C06A6.2	C06A6.2a	0,242202	0,143633	1.68626	0.753824
C06A6.2	C06A6.2	C06A6.2b	0,241609	0,143584	1.6827	0.750779
C06A6.3	C06A6.3	C06A6.3	0,929867	0,731419	1.27132	0.346326
C06A6.4	C06A6.4	C06A6.4a.1	1,61058	0,825111	1.95196	0.96492
C06A6.4	C06A6.4	C06A6.4a.2	1,60861	0,821777	1.95748	0.968996
C06A6.4	C06A6.4	C06A6.4b	1,58099	0,928039	1.70358	0.768571
C06A6.5	C06A6.5	C06A6.5	1,18605	0,630703	1.88052	0.911132
C06A6.7	C06A6.7	C06A6.7	0,002945	0,002663	1.106	0.145347
C06A8.1	C06A8.1	C06A8.1a.1	3,20159	1,73557	1.84469	0.883379
C06A8.1	C06A8.1	C06A8.1a.2	3,49761	1,78455	1.95994	0.970809
C06A8.1	C06A8.1	C06A8.1b	3,24131	1,66301	1.94906	0.96278
C06A8.2	C06A8.2	C06A8.2	1,1383	0,791792	1.43763	0.523687
C06A8.3	C06A8.3	C06A8.3.1	10,2596	14,6057	0.702438	-0.509557
C06A8.3	C06A8.3	C06A8.3.2	11,9044	13,6253	0.873698	-0.194793
skr-17	C06A8.4	C06A8.4	1,12508	0,658563	1.70839	0.772634
C06A8.5	C06A8.5	C06A8.5	0,746919	0,501704	1.48876	0.574115
C06A8.6	C06A8.6	C06A8.6	0,011075	0,003689	3.00217	1.58601
srh-39	C06A8.7	C06A8.7	0,000361	0,000369	0.977401	-0.0329774
C06A8.8	C06A8.8	C06A8.8a	0,135633	0,15757	0.860779	-0.216285
C06A8.8	C06A8.8	C06A8.8b.1	0,196467	0,122164	1.60822	0.685468
C06A8.8	C06A8.8	C06A8.8b.2	0,19113	0,117599	1.62527	0.700678
glr-4	C06A8.9	C06A8.9	0,064614	0,035379	1.82633	0.868949
C06B3.1	C06B3.1	C06B3.1	0	0
str-250	C06B3.10	C06B3.10	0,000165	0,000353	0.467057	-1.09833
srx-42	C06B3.11	C06B3.11	0	0
srxa-11	C06B3.12	C06B3.12	0	0
srxa-12	C06B3.13	C06B3.13	0,001182	0,002003	0.590339	-0.760383
srxa-13	C06B3.14	C06B3.14	0	0
C06B3.2	C06B3.2	C06B3.2	0,031509	0,002659	11.8498	3.56679	1
cyp-35C1	C06B3.3	C06B3.3	0,571427	0,030303	18.8571	4.23704	1
stdh-1	C06B3.4	C06B3.4	0,408066	0,481607	0.847301	-0.239054
C06B3.5	C06B3.5	C06B3.5	0,003982	0,002433	1.63678	0.710858
C06B3.6	C06B3.6	C06B3.6.1	2,72149	3,33616	0.815755	-0.293792
C06B3.6	C06B3.6	C06B3.6.2	4,24419	2,61566	1.62261	0.698314
C06B3.6	C06B3.6	C06B3.6.3	4,27678	2,6552	1.61072	0.687704
C06B3.7	C06B3.7	C06B3.7	1,05071	0,080304	13.0842	3.70975	1
gcy-32	C06B3.8	C06B3.8.1	0,050584	0,009641	5.24674	2.39142	1
gcy-32	C06B3.8	C06B3.8.2	0,051391	0,009672	5.31334	2.40962	1
str-252	C06B3.9	C06B3.9	0,000354	0
nhr-150	C06B8.1	C06B8.1	0,016156	0,016291	0.991713	-0.0120051
srh-218	C06B8.10	C06B8.10	0	0,000342	0
C06B8.11	C06B8.11	C06B8.11	0	0
C06B8.2	C06B8.2	C06B8.2a	0,050077	0,043146	1.16064	0.214918
C06B8.2	C06B8.2	C06B8.2b	0,04749	0,042791	1.10982	0.150325
nhr-151	C06B8.3	C06B8.3	0,016148	0,010001	1.61464	0.691211
str-264	C06B8.4	C06B8.4	0,001431	0,007616	0.187876	-2.41215		1
srh-219	C06B8.6	C06B8.6	0	0
C06B8.7	C06B8.7	C06B8.7	0,303637	0,143509	2.1158	1.08121
rpl-38	C06B8.8	C06B8.8.1	157,265	581,442	0.270474	-1.88644		1
rpl-38	C06B8.8	C06B8.8.2	142,988	520,017	0.274968	-1.86266		1
rpl-38	C06B8.8	C06B8.8.3	161,984	589,468	0.274797	-1.86356		1
srw-21	C06B8.9	C06B8.9	0	0
mel-11	C06C3.1	C06C3.1a	2,43626	1,25005	1.94893	0.962682
mel-11	C06C3.1	C06C3.1b	2,70625	1,34335	2.01455	1.01046
mel-11	C06C3.1	C06C3.1c	2,41774	1,19167	2.02887	1.02067
mel-11	C06C3.1	C06C3.1d	2,69449	1,3269	2.03067	1.02195
C06C3.3	C06C3.3	C06C3.3	0,006013	0,001809	3.32386	1.73286	1
C06C3.4	C06C3.4	C06C3.4	0,060154	0,046072	1.30565	0.38477
srh-48	C06C3.6	C06C3.6	0,016165	0,014922	1.08333	0.115468
C06C3.7	C06C3.7	C06C3.7	0,006435	0,054284	0.118549	-3.07644		1
C06C3.8	C06C3.8	C06C3.8	0,004335	0,003239	1.33828	0.420384
C06C6.1	C06C6.1	C06C6.1	0,000366	0
str-233	C06C6.2	C06C6.2	0,000035	0,000345	0.102504	-3.28624		1
str-231	C06C6.3	C06C6.3	0,000369	0
nhr-63	C06C6.4	C06C6.4	0,145761	0,055993	2.6032	1.38029
nhr-50	C06C6.5	C06C6.5a	0,18928	0,108028	1.75214	0.809117
nhr-50	C06C6.5	C06C6.5b.1	0,372241	0,255079	1.45932	0.545293
nhr-50	C06C6.5	C06C6.5b.2	0,155226	0,095973	1.61739	0.69367
C06C6.6	C06C6.6	C06C6.6	0	0,000225	0
C06C6.7	C06C6.7	C06C6.7	0,001345	0
C06C6.8	C06C6.8	C06C6.8	0,003947	0,011089	0.3559	-1.49046
C06C6.9	C06C6.9	C06C6.9	0	0
C06E1.1	C06E1.1	C06E1.1	0,250883	0,25506	0.983623	-0.0238219
rha-2	C06E1.10	C06E1.10	0,412143	0,199629	2.06454	1.04582
C06E1.11	C06E1.11	C06E1.11	0,05864	0,048806	1.20149	0.264824
C06E1.3	C06E1.3	C06E1.3	0,240309	0,032358	7.42657	2.8927	1
glr-1	C06E1.4	C06E1.4	0,02631	0,008914	2.95158	1.56149
C06E1.5	C06E1.5	C06E1.5	0,015561	0,168841	0.0921648	-3.43964		1
C06E1.6	C06E1.6	C06E1.6	0,25144	0,648386	0.387794	-1.36664
C06E1.7	C06E1.7	C06E1.7	0,016623	0,001431	11.6164	3.53809	1
C06E1.8	C06E1.8	C06E1.8	0,159319	0,031538	5.05165	2.33676	1
C06E1.9	C06E1.9	C06E1.9	0,55777	0,235302	2.37044	1.24516
C06E2.1	C06E2.1	C06E2.1	0,040195	0,01211	3.31917	1.73082	1
C06E2.2	C06E2.2	C06E2.2	0,002376	0
ubc-21	C06E2.3	C06E2.3	0,012143	0,013022	0.93246	-0.100886
C06E2.5	C06E2.5	C06E2.5.1	0,233734	0,59749	0.391193	-1.35405
C06E2.5	C06E2.5	C06E2.5.2	0,231241	0,48967	0.472238	-1.08241
ubc-22	C06E2.7	C06E2.7	0,030037	0,029139	1.0308	0.0437653
ins-9	C06E2.8	C06E2.8	0,00297	0,003212	0.92463	-0.113053
C06E2.9	C06E2.9	C06E2.9	0,011827	0,204032	0.0579664	-4.10864		1
C06E4.1	C06E4.1	C06E4.1	0	0
C06E4.2	C06E4.2	C06E4.2	0,216568	0,432282	0.500988	-0.997153
C06E4.3	C06E4.3	C06E4.3	0,00532	0,002038	2.6104	1.38427
C06E4.4	C06E4.4	C06E4.4	0,002093	0
C06E4.5	C06E4.5	C06E4.5	0	0
C06E4.6	C06E4.6	C06E4.6	0	0,008329	0
C06E4.7	C06E4.7	C06E4.7	0,013285	0,015567	0.853389	-0.228725
C06E4.8	C06E4.8	C06E4.8	0,065972	0,054501	1.21047	0.275569
C06E7.1	C06E7.1	C06E7.1a.1	0,993694	0,546237	1.81916	0.863275
C06E7.1	C06E7.1	C06E7.1a.2	1,41064	0,527365	2.67488	1.41948
C06E7.1	C06E7.1	C06E7.1b	0,997875	0,542816	1.83833	0.878396
C06E7.1	C06E7.1	C06E7.1c	0,392413	0,10317	3.80356	1.92735	1
C06E7.1	C06E7.1	C06E7.1d	0,014415	0
C06E7.2	C06E7.2	C06E7.2.1	0,13327	0,077077	1.72905	0.78998
C06E7.2	C06E7.2	C06E7.2.2	0,139478	0,080831	1.72555	0.787057
C06E7.3	C06E7.3	C06E7.3a	2,79559	1,28429	2.17676	1.12218
C06E7.3	C06E7.3	C06E7.3b.1	1,31949	0,768773	1.71636	0.779351
C06E7.3	C06E7.3	C06E7.3b.2	2,04625	1,19957	1.70582	0.770465
C06E7.3	C06E7.3	C06E7.3b.3	1,33952	0,56864	2.35566	1.23613
C06E7.3	C06E7.3	C06E7.3b.4	2,79559	1,28429	2.17676	1.12218
C06E7.4	C06E7.4	C06E7.4	0,874949	0,50296	1.7396	0.798755
spe-27	C06E7.6	C06E7.6	0,001337	0,000503	2.6574	1.41001
srv-17	C06E7.7	C06E7.7	0	0
prk-1	C06E8.3	C06E8.3a	0,394588	0,363376	1.08589	0.118884
prk-1	C06E8.3	C06E8.3b	0,241395	0,218821	1.10316	0.141645
prk-1	C06E8.3	C06E8.3c	0,389382	0,346239	1.1246	0.169418
C06E8.5	C06E8.5	C06E8.5	0,068784	0,025581	2.68889	1.42701
C06G1.1	C06G1.1	C06G1.1	0,631224	0,046503	13.5738	3.76276	1
C06G1.2	C06G1.2	C06G1.2	0,138692	0,033058	4.19541	2.06881	1
ain-1	C06G1.4	C06G1.4.1	2,33698	1,11129	2.10294	1.07241
ain-1	C06G1.4	C06G1.4.2	3,75386	1,4221	2.63966	1.40035
C06G1.5	C06G1.5	C06G1.5	0,351403	0,113081	3.10753	1.63577	1
cogc-2	C06G3.10	C06G3.10	0,66805	0,340002	1.96484	0.974413
tin-9.1	C06G3.11	C06G3.11a	6,86448	24,4368	0.280907	-1.83183		1
tin-9.1	C06G3.11	C06G3.11b.1	5,88299	21,306	0.276119	-1.85664		1
tin-9.1	C06G3.11	C06G3.11b.2	6,26654	22,5371	0.278054	-1.84656		1
C06G3.12	C06G3.12	C06G3.12.1	0,014795	0,001263	11.714	3.55016	1
C06G3.12	C06G3.12	C06G3.12.2	0,015885	0,005051	3.14484	1.65299	1
nhr-105	C06G3.1	C06G3.1a.1	0,39806	0,183604	2.16804	1.11639
nhr-105	C06G3.1	C06G3.1a.2	0,377593	0,176586	2.1383	1.09646
nhr-105	C06G3.1	C06G3.1b	0,391665	0,186587	2.0991	1.06977
klp-18	C06G3.2	C06G3.2	1,65563	0,856845	1.93224	0.950274
C06G3.3	C06G3.3	C06G3.3	0,198577	14,5907	0.0136098	-6.19921		1
C06G3.4	C06G3.4	C06G3.4	0,000346	0
C06G3.5	C06G3.5	C06G3.5a	1,7414	1,80661	0.963905	-0.0530375
C06G3.5	C06G3.5	C06G3.5b.1	1,49993	1,63961	0.914809	-0.128458
C06G3.5	C06G3.5	C06G3.5b.2	1,59028	1,54899	1.02666	0.037953
C06G3.6	C06G3.6	C06G3.6	0,559232	0,410571	1.36208	0.445815
trxr-1	C06G3.7	C06G3.7	1,12867	0,677051	1.66704	0.737287
C06G3.8	C06G3.8	C06G3.8	0,871559	1,44659	0.602492	-0.730986
C06G3.9	C06G3.9	C06G3.9.1	1,05174	0,70769	1.48616	0.571589
C06G3.9	C06G3.9	C06G3.9.2	1,06188	0,71151	1.49243	0.577665
C06G4.1	C06G4.1	C06G4.1	0,607781	0,275413	2.2068	1.14195
clp-1	C06G4.2	C06G4.2a.1	2,17654	1,3971	1.5579	0.639601
clp-1	C06G4.2	C06G4.2a.2	2,1833	1,3998	1.55972	0.64129
clp-1	C06G4.2	C06G4.2b.1	2,25757	1,5174	1.48779	0.573169
clp-1	C06G4.2	C06G4.2b.2	2,24121	1,50292	1.49124	0.57651
clp-1	C06G4.2	C06G4.2b.3	2,22074	1,49049	1.48994	0.575254
clp-1	C06G4.2	C06G4.2c	0,351482	0,806208	0.435969	-1.1977
clp-1	C06G4.2	C06G4.2d	2,28155	1,51223	1.50873	0.593337
C06G4.4	C06G4.4	C06G4.4	0,046069	0,04917	0.936931	-0.0939852
C06G4.5	C06G4.5	C06G4.5	0,090823	0,041451	2.19109	1.13165
C06G4.6	C06G4.6	C06G4.6	0,032558	0,027887	1.1675	0.223419
C06G8.1	C06G8.1	C06G8.1	0,295	0,24272	1.21539	0.281422
opt-1	C06G8.2	C06G8.2	0,57905	0,473793	1.22216	0.289431
C06G8.3	C06G8.3	C06G8.3b.1	0,286471	0,396179	0.723085	-0.467763
C06G8.3	C06G8.3	C06G8.3b.2	0,237963	0,281423	0.845571	-0.242003
srd-7	C06G8.4	C06G8.4	0,000803	0
atp-5	C06H2.1	C06H2.1.1	13,7759	10,0866	1.36576	0.449707
atp-5	C06H2.1	C06H2.1.2	13,9715	9,92483	1.40773	0.493373
C06H2.2	C06H2.2	C06H2.2	0,29536	0,138175	2.13758	1.09598
C06H2.3	C06H2.3	C06H2.3	0,257211	0,12809	2.00805	1.00579
tag-330	C06H2.4	C06H2.4	0,122589	0,0847	1.44733	0.533396
C06H2.5	C06H2.5	C06H2.5	0,193552	0,030473	6.35159	2.66712	1
C06H2.6	C06H2.6	C06H2.6.1	3,71148	4,89211	0.758667	-0.398462
C06H2.6	C06H2.6	C06H2.6.2	3,93436	4,53373	0.867798	-0.20457
C06H2.7	C06H2.7	C06H2.7	0,4345	0,403451	1.07696	0.106963
C06H5.1	C06H5.1	C06H5.1	0,133212	0,157527	0.845646	-0.241875
C06H5.2	C06H5.2	C06H5.2	0,062635	0,029454	2.12654	1.08851
C06H5.6	C06H5.6	C06H5.6	0,175968	0,14691	1.19779	0.26038
C06H5.7	C06H5.7	C06H5.7.1	1,79631	0,940743	1.90946	0.933164
C06H5.7	C06H5.7	C06H5.7.2	1,85923	0,807225	2.30324	1.20366
C06H5.8	C06H5.8	C06H5.8	0,053108	0,089533	0.593162	-0.753501
ham-2	C07A12.1	C07A12.1a	0,224198	0,194377	1.15342	0.205916
ham-2	C07A12.1	C07A12.1b	0,258325	0,222625	1.16036	0.214572
ham-2	C07A12.1	C07A12.1c	0,258716	0,2434	1.06293	0.0880401
C07A12.2	C07A12.2	C07A12.2	0,182587	0,117647	1.55199	0.63412
nhr-35	C07A12.3	C07A12.3a	0,532766	0,597239	0.892048	-0.164806
nhr-35	C07A12.3	C07A12.3b	0,471203	0,454732	1.03622	0.0513322
pdi-2	C07A12.4	C07A12.4a.1	27,729	11,7677	2.35637	1.23656
pdi-2	C07A12.4	C07A12.4a.2	28,9968	11,4242	2.53819	1.3438
pdi-2	C07A12.4	C07A12.4a.3	28,2586	11,5668	2.44308	1.2887
pdi-2	C07A12.4	C07A12.4b	27,0081	11,8105	2.28679	1.19332
spr-3	C07A12.5	C07A12.5a	0,39094	0,235473	1.66023	0.731386
spr-3	C07A12.5	C07A12.5b	0,400211	0,236145	1.69477	0.761088
C07A12.7	C07A12.7	C07A12.7a.1	1,66788	0,914066	1.82468	0.867645
C07A12.7	C07A12.7	C07A12.7a.2	1,70551	0,924122	1.84555	0.884048
C07A12.7	C07A12.7	C07A12.7b	1,73446	0,85777	2.02206	1.01582
C07A12.7	C07A12.7	C07A12.7c.1	1,73446	0,85777	2.02206	1.01582
C07A12.7	C07A12.7	C07A12.7c.2	1,03905	0,816196	1.27304	0.348278
C07A4.1	C07A4.1	C07A4.1	0,138157	0,094545	1.46128	0.547236
C07A4.2	C07A4.2	C07A4.2	0,079803	0,019156	4.16596	2.05865	1
C07A4.3	C07A4.3	C07A4.3	0,046538	0,06414	0.725572	-0.462809
C07A9.1	C07A9.1	C07A9.1	0,009472	0,003322	2.85141	1.51167
C07A9.10	C07A9.10	C07A9.10	0,00057	0
ncx-7	C07A9.11	C07A9.11	0,206316	0,068951	2.99221	1.58121
C07A9.12	C07A9.12	C07A9.12	0,166207	0,05677	2.92773	1.54978
C07A9.13	C07A9.13	C07A9.13	0,010852	0,00904	1.20044	0.263566
C07A9.2	C07A9.2	C07A9.2.1	2,80371	2,21068	1.26826	0.342847
C07A9.2	C07A9.2	C07A9.2.2	2,00594	5,1459	0.389813	-1.35914
tlk-1	C07A9.3	C07A9.3a	5,12188	2,4453	2.09458	1.06666
tlk-1	C07A9.3	C07A9.3b	5,33261	2,44201	2.1837	1.12677
tlk-1	C07A9.3	C07A9.3c	5,39598	2,45457	2.19834	1.13641
ncx-6	C07A9.4	C07A9.4	0,09843	0,005272	18.6704	4.22268	1
C07A9.5	C07A9.5	C07A9.5	0,00314	0
ugt-60	C07A9.6	C07A9.6.1	0,107031	0,042132	2.54037	1.34504
ugt-60	C07A9.6	C07A9.6.2	0,107221	0,041942	2.55641	1.35412
C07A9.7	C07A9.7	C07A9.7a	0,646262	0,321982	2.00714	1.00514
C07A9.7	C07A9.7	C07A9.7b	0,632368	0,309445	2.04356	1.03108
C07A9.8	C07A9.8	C07A9.8	0,092676	0,030259	3.06276	1.61483	1
C07A9.9	C07A9.9	C07A9.9	1,15241	0,183506	6.27996	2.65075	1
C07B5.2	C07B5.2	C07B5.2	0,00068	0
C07B5.3	C07B5.3	C07B5.3	0,299056	0,224547	1.33182	0.413398
C07B5.4	C07B5.4	C07B5.4a	0,116526	0,140816	0.827505	-0.273159
C07B5.4	C07B5.4	C07B5.4b.1	0,106451	0,115234	0.923781	-0.114377
C07B5.4	C07B5.4	C07B5.4b.2	0,104008	0,115265	0.902338	-0.14826
nuc-1	C07B5.5	C07B5.5	1,40027	4,24598	0.329787	-1.60039
C07B5.6	C07B5.6	C07B5.6	0,004451	0,004253	1.0465	0.0655741
C07C7.1	C07C7.1	C07C7.1	0,003904	0,002249	1.73602	0.795788
C07D10.1	C07D10.1	C07D10.1	0,050842	0,035091	1.44885	0.534908
bath-44	C07D10.2	C07D10.2a	1,8116	0,604961	2.99457	1.58235
bath-44	C07D10.2	C07D10.2b.1	1,80503	0,752423	2.39896	1.26241
bath-44	C07D10.2	C07D10.2b.2	1,80704	0,620636	2.91159	1.54181
sre-3	C07D10.3	C07D10.3	0,005374	0,000618	8.69654	3.12044	1
nas-7	C07D10.4	C07D10.4	0,270305	0,124404	2.1728	1.11956
C07D10.5	C07D10.5	C07D10.5	0,421412	0,375562	1.12208	0.16618
C07D10.6	C07D10.6	C07D10.6	0,00793	0,087742	0.0903834	-3.4678		1
C07D8.2	C07D8.2	C07D8.2	0,003031	0
C07D8.3	C07D8.3	C07D8.3	0,005953	0,001151	5.17228	2.3708	1
C07D8.5	C07D8.5	C07D8.5	0,010562	0,005519	1.91375	0.936404
C07D8.6	C07D8.6	C07D8.6.1	7,67812	4,33376	1.7717	0.825134
C07D8.6	C07D8.6	C07D8.6.2	8,68529	4,4512	1.95122	0.96438
C07E3.10	C07E3.10	C07E3.10	0,262602	0,105951	2.47852	1.30948
C07E3.1	C07E3.1	C07E3.1a	0,902654	0,379753	2.37695	1.24911
C07E3.1	C07E3.1	C07E3.1b	0,80665	0,38704	2.08415	1.05946
pro-2	C07E3.2	C07E3.2.1	1,22203	0,48703	2.50915	1.3272
pro-2	C07E3.2	C07E3.2.2	1,27782	0,489979	2.60791	1.38289
C07E3.3	C07E3.3	C07E3.3	3,9824	1,165	3.41837	1.77331	1
C07E3.4	C07E3.4	C07E3.4	0,000536	0,000497	1.0793	0.110101
C07E3.5	C07E3.5	C07E3.5	0,010329	0,001946	5.30791	2.40814	1
C07E3.6	C07E3.6	C07E3.6	0,375461	0,267619	1.40297	0.488483
C07E3.8	C07E3.8	C07E3.8	0,024775	0,005581	4.43926	2.15032	1
C07E3.9	C07E3.9	C07E3.9	4,27395	1,0911	3.9171	1.96979	1
tol-1	C07F11.1	C07F11.1	1,24234	0,581955	2.13477	1.09408
C07F11.2	C07F11.2	C07F11.2	0,025133	0,006735	3.73176	1.89986	1
try-2	C07G1.1	C07G1.1	0,024222	0,001571	15.4181	3.94655	1
C07G1.2	C07G1.2	C07G1.2	0,021832	0,002709	8.05917	3.01063	1
pct-1	C07G1.3	C07G1.3a.1	2,26459	0,911747	2.48379	1.31254
pct-1	C07G1.3	C07G1.3a.2	2,28411	0,924603	2.47037	1.30473
pct-1	C07G1.3	C07G1.3b	1,75863	0,676011	2.60148	1.37933
pct-1	C07G1.3	C07G1.3c	1,84653	0,756244	2.44171	1.28789
wsp-1	C07G1.4	C07G1.4a	0,973788	0,595138	1.63624	0.710383
wsp-1	C07G1.4	C07G1.4b	0,743195	0,405164	1.83431	0.875235
hgrs-1	C07G1.5	C07G1.5.1	2,52251	1,21116	2.08272	1.05847
hgrs-1	C07G1.5	C07G1.5.2	2,51735	1,18717	2.12046	1.08438
C07G1.6	C07G1.6	C07G1.6	0,017252	0,009524	1.81138	0.857091
C07G1.7	C07G1.7	C07G1.7	0,032974	0,025207	1.30812	0.387491
glrx-22	C07G1.8	C07G1.8	1,4814	1,61374	0.917992	-0.123447
cej-1	C07G2.1	C07G2.1a.1	62,074	18,3085	3.39045	1.76148	1
cej-1	C07G2.1	C07G2.1a.2	62,0827	18,3065	3.39129	1.76184	1
cej-1	C07G2.1	C07G2.1b.1	57,3161	16,4601	3.48212	1.79997	1
cej-1	C07G2.1	C07G2.1b.2	57,3953	16,2579	3.5303	1.81979	1
atf-7	C07G2.2	C07G2.2a.1	3,46541	1,94016	1.78615	0.83685
atf-7	C07G2.2	C07G2.2a.2	3,46413	1,91482	1.80912	0.855284
atf-7	C07G2.2	C07G2.2a.3	3,46376	1,92487	1.79948	0.847578
atf-7	C07G2.2	C07G2.2a.4	3,75876	1,99324	1.88575	0.915141
atf-7	C07G2.2	C07G2.2b	3,75439	1,99729	1.87974	0.910535
atf-7	C07G2.2	C07G2.2c.1	3,43593	1,96747	1.74637	0.804359
atf-7	C07G2.2	C07G2.2c.2	3,57111	1,98249	1.80133	0.849059
cct-5	C07G2.3	C07G2.3a	14,0367	4,51674	3.10771	1.63585	1
cct-5	C07G2.3	C07G2.3b.1	13,6108	4,45385	3.05596	1.61163	1
cct-5	C07G2.3	C07G2.3b.2	13,875	4,43833	3.12618	1.6444	1
cct-5	C07G2.3	C07G2.3b.3	13,6207	4,38046	3.10942	1.63665	1
cct-5	C07G2.3	C07G2.3b.4	12,976	4,44545	2.91894	1.54544
cct-5	C07G2.3	C07G2.3b.5	13,397	4,5369	2.9529	1.56213
cct-5	C07G2.3	C07G2.3b.6	13,4008	4,53688	2.95375	1.56255
cct-5	C07G2.3	C07G2.3b.7	14,0367	4,51674	3.10771	1.63585	1
C07G3.10	C07G3.10	C07G3.10	0,001379	0,015309	0.0901012	-3.47231		1
C07G3.2	C07G3.2	C07G3.2	0,450409	0,083441	5.39793	2.43241	1
str-227	C07G3.3	C07G3.3	0,001682	0,000337	4.99252	2.31977	1
str-226	C07G3.4	C07G3.4	0	0
str-228	C07G3.5	C07G3.5	0,001551	0,000351	4.41966	2.14393	1
str-225	C07G3.6	C07G3.6	0,000188	0,000686	0.274047	-1.86751		1
C07G3.8	C07G3.8	C07G3.8	0,011498	0,008254	1.39301	0.478205
ugt-64	C07G3.9	C07G3.9.1	0,484115	0,340869	1.42024	0.506132
ugt-64	C07G3.9	C07G3.9.2	0,477142	0,343129	1.39056	0.475668
C07H4.1	C07H4.1	C07H4.1	0,28966	0,128368	2.25648	1.17407
clh-5	C07H4.2	C07H4.2.1	1,07159	0,399407	2.68295	1.42382
clh-5	C07H4.2	C07H4.2.2	1,06781	0,402807	2.65092	1.40649
lig-4	C07H6.1	C07H6.1	0,405491	0,197944	2.04851	1.03458
C07H6.2	C07H6.2	C07H6.2	3,75406	12,3789	0.303263	-1.72136		1
C07H6.3	C07H6.3	C07H6.3.1	0,533719	0,17893	2.98284	1.57669
C07H6.3	C07H6.3	C07H6.3.2	0,533682	0,179352	2.97561	1.57319
C07H6.4	C07H6.4	C07H6.4	0,995598	0,551313	1.80587	0.852692
cgh-1	C07H6.5	C07H6.5.1	25,5838	10,7884	2.37142	1.24575
cgh-1	C07H6.5	C07H6.5.2	30,2837	10,8926	2.78021	1.47519
clk-2	C07H6.6	C07H6.6	0,753211	0,317899	2.36934	1.24449
lin-39	C07H6.7	C07H6.7.1	0,333616	0,154924	2.15342	1.10663
lin-39	C07H6.7	C07H6.7.2	0,332498	0,149606	2.22249	1.15218
cux-7	C07H6.8	C07H6.8.1	0,64441	0,442125	1.45753	0.543525
cux-7	C07H6.8	C07H6.8.2	0,661524	0,45359	1.45842	0.544405
C07H6.9	C07H6.9	C07H6.9	0,053593	0,012055	4.44572	2.15242	1
sod-3	C08A9.1	C08A9.1	0,104109	0,219429	0.474454	-1.07566
C08A9.10	C08A9.10	C08A9.10	7,02893	10,192	0.689652	-0.53606
C08A9.3	C08A9.3	C08A9.3	0,000131	0
C08A9.6	C08A9.6	C08A9.6	0,163906	0,185749	0.882406	-0.180486
sdz-2	C08A9.7	C08A9.7	0,045627	0,039464	1.15617	0.209357
C08A9.8	C08A9.8	C08A9.8	0,006598	0,009765	0.675684	-0.56558
C08A9.9	C08A9.9	C08A9.9	0,015077	0,004717	3.19633	1.67642	1
zyg-11	C08B11.1	C08B11.1	4,1809	2,0691	2.02064	1.01481
hda-2	C08B11.2	C08B11.2	0,735806	0,310868	2.36694	1.24302
C08B11.3	C08B11.3	C08B11.3	2,28256	1,20148	1.89979	0.92584
nrf-6	C08B11.4	C08B11.4	0,742905	0,431531	1.72156	0.783714
sap-49	C08B11.5	C08B11.5.1	3,82444	2,05493	1.8611	0.896159
sap-49	C08B11.5	C08B11.5.2	3,80333	2,03461	1.86932	0.902511
sap-49	C08B11.5	C08B11.5.3	3,83025	2,05674	1.86229	0.897079
sap-49	C08B11.5	C08B11.5.4	2,07632	1,2235	1.69703	0.763015
C08B11.6	C08B11.6	C08B11.6.1	2,07632	1,2235	1.69703	0.763015
C08B11.6	C08B11.6	C08B11.6.2	1,12633	0,480582	2.34368	1.22878
ubh-4	C08B11.7	C08B11.7	2,40637	1,23816	1.9435	0.958661
C08B11.8	C08B11.8	C08B11.8	0,643808	0,320491	2.00882	1.00635
C08B11.9	C08B11.9	C08B11.9	2,03699	1,18539	1.71841	0.781077
ugt-17	C08B6.1	C08B6.1	0,049145	0,194312	0.25292	-1.98325		1
C08B6.10	C08B6.10	C08B6.10	0,262851	1,83307	0.143394	-2.80194		1
C08B6.11	C08B6.11	C08B6.11	0,04965	0,029891	1.66104	0.732088
srxa-18	C08B6.12	C08B6.12	0	0
srxa-19	C08B6.13	C08B6.13	0,000466	0
C08B6.14	C08B6.14	C08B6.14	0,000142	0
C08B6.2	C08B6.2	C08B6.2	0,003824	0,054664	0.0699619	-3.83729		1
C08B6.3	C08B6.3	C08B6.3	0,105281	0,075254	1.39901	0.484405
C08B6.4	C08B6.4	C08B6.4a	0,04393	0,024246	1.81183	0.85745
C08B6.4	C08B6.4	C08B6.4b	0,063511	0,024796	2.56136	1.35691
C08B6.5	C08B6.5	C08B6.5	0,001494	0
C08B6.6	C08B6.6	C08B6.6	0	0
C08B6.7	C08B6.7	C08B6.7	1,865	0,778176	2.39663	1.26101
C08B6.8	C08B6.8	C08B6.8	0,767361	0,67779	1.13215	0.179067
aos-1	C08B6.9	C08B6.9	1,58204	1,11854	1.41438	0.500169
egl-5	C08C3.1	C08C3.1a	0,129144	0,225084	0.573759	-0.801483
egl-5	C08C3.1	C08C3.1b	0,09662	0,131033	0.737375	-0.439529
egl-5	C08C3.1	C08C3.1c	0,135032	0,22994	0.587249	-0.767956
bath-15	C08C3.2	C08C3.2	0,332705	0,231501	1.43716	0.523225
mab-5	C08C3.3	C08C3.3	0,097547	0,124665	0.782474	-0.353886
C08C3.4	C08C3.4	C08C3.4a	3,51591	1,40661	2.49956	1.32168
C08C3.4	C08C3.4	C08C3.4b	2,98422	1,24859	2.39007	1.25705
C08D8.1	C08D8.1	C08D8.1	0,01951	0,007845	2.48697	1.31439
tmd-2	C08D8.2	C08D8.2a	0,179854	0,067421	2.66763	1.41556
tmd-2	C08D8.2	C08D8.2b	0,095687	0,051375	1.86252	0.897259
C08E3.1	C08E3.1	C08E3.1	nan	nan
C08E3.10	C08E3.10	C08E3.10a	0,116192	0,016392	7.08834	2.82545	1
C08E3.10	C08E3.10	C08E3.10b	0,106104	0,012247	8.66367	3.11498	1
C08E3.11	C08E3.11	C08E3.11	0,003127	0
C08E3.12	C08E3.12	C08E3.12	0	0
C08E3.13	C08E3.13	C08E3.13	2,35575	10,4526	0.225375	-2.1496		1
C08E3.14	C08E3.14	C08E3.14	0,000713	0
C08E3.15	C08E3.15	C08E3.15	0,035395	0,003059	11.5709	3.53243	1
C08E3.2	C08E3.2	C08E3.2	0,000692	0
bath-33	C08E3.3	C08E3.3	0,008978	0,002864	3.13481	1.64838	1
C08E3.4	C08E3.4	C08E3.4	0,053744	0,014382	3.73689	1.90184	1
C08E3.5	C08E3.5	C08E3.5	0,075316	0,031508	2.39038	1.25724
C08E3.6	C08E3.6	C08E3.6	0,151464	0,196993	0.76888	-0.379169
C08E3.7	C08E3.7	C08E3.7	0,007562	0,056697	0.133382	-2.90636		1
C08E3.8	C08E3.8	C08E3.8	0,029906	0,026434	1.13133	0.178016
C08E3.9	C08E3.9	C08E3.9	0,040076	0,013797	2.90467	1.53838
C08E8.1	C08E8.1	C08E8.1	0,005371	0,003739	1.43643	0.522487
C08E8.2	C08E8.2	C08E8.2	0	0,001308	0
C08E8.3	C08E8.3	C08E8.3	0	0,041257	0
C08E8.4	C08E8.4	C08E8.4	0,871423	0,305594	2.85157	1.51176
C08E8.5	C08E8.5	C08E8.5	0	0
C08E8.6	C08E8.6	C08E8.6	0	0
math-2	C08F1.1	C08F1.1	0,000123	0
C08F1.10	C08F1.10	C08F1.10	0,308527	0,326088	0.946146	-0.0798646
C08F1.11	C08F1.11	C08F1.11	0,053847	0,025839	2.08393	1.05931
fbxb-13	C08F1.3	C08F1.3	0,022591	0,013963	1.61792	0.694139
math-3	C08F1.4	C08F1.4a	0,132514	0,067821	1.95388	0.966341
math-3	C08F1.4	C08F1.4b	0,132961	0,065794	2.02087	1.01498
math-4	C08F1.5	C08F1.5a	0,093721	0,056859	1.64831	0.720987
math-4	C08F1.5	C08F1.5b	0,084971	0,053521	1.58762	0.666862
C08F1.6	C08F1.6	C08F1.6	0,236132	0,195236	1.20947	0.274374
C08F1.8	C08F1.8	C08F1.8	0,015663	0,014652	1.06902	0.0962906
C08F11.1	C08F11.1	C08F11.1	0,032362	0,014619	2.21372	1.14647
C08F11.10	C08F11.10	C08F11.10	0,008474	0,001718	4.93269	2.30238	1
C08F11.11	C08F11.11	C08F11.11	88,8012	502,208	0.176822	-2.49963		1
C08F11.12	C08F11.12	C08F11.12.1	0,495339	2,17477	0.227766	-2.13437		1
C08F11.12	C08F11.12	C08F11.12.2	0,50505	2,21779	0.227727	-2.13462		1
C08F11.13	C08F11.13	C08F11.13.1	0,531716	0,323495	1.64366	0.716912
C08F11.13	C08F11.13	C08F11.13.2	0,53591	0,33012	1.62338	0.699
C08F11.14	C08F11.14	C08F11.14	0,000804	0,000167	4.81167	2.26654	1
C08F11.17	C08F11.17	C08F11.17	0	0,003885	0
C08F11.2	C08F11.2	C08F11.2	0	0
C08F11.3	C08F11.3	C08F11.3	0,018417	0,029113	0.632604	-0.660625
sru-21	C08F11.4	C08F11.4	0,013503	0,044366	0.304355	-1.71617		1
fbxa-98	C08F11.5	C08F11.5	0,105281	0,036282	2.90174	1.53692
C08F11.7	C08F11.7	C08F11.7	0,038195	0,017932	2.13	1.09085
ugt-22	C08F11.8	C08F11.8	0,185408	0,07694	2.40977	1.2689
srz-29	C08F11.9	C08F11.9	0	0,000393	0
pfd-1	C08F8.1	C08F8.1	3,51345	6,84979	0.512928	-0.963171
C08F8.2	C08F8.2	C08F8.2a	0,530759	0,234215	2.26612	1.18022
C08F8.2	C08F8.2	C08F8.2b.1	0,57221	0,239815	2.38605	1.25462
C08F8.2	C08F8.2	C08F8.2b.2	0,572121	0,239687	2.38695	1.25517
C08F8.3	C08F8.3	C08F8.3	1,57759	0,832176	1.89574	0.922762
C08F8.4	C08F8.4	C08F8.4	0,007402	0,004216	1.75574	0.812081
fbxb-9	C08F8.5	C08F8.5	0,005768	0,009563	0.603131	-0.729457
C08F8.6	C08F8.6	C08F8.6	0,014181	0,003911	3.62603	1.85839	1
rap-3	C08F8.7	C08F8.7	0,104687	0,033106	3.16218	1.66092	1
nhr-67	C08F8.8	C08F8.8	0,133843	0,107352	1.24677	0.318193
C08F8.9	C08F8.9	C08F8.9	4,68032	8,63585	0.541964	-0.883731
C08G5.1	C08G5.1	C08G5.1	0	0
C08G5.2	C08G5.2	C08G5.2	0	0,000427	0
C08G5.3	C08G5.3	C08G5.3	0,001736	0,000653	2.65861	1.41067
snt-6	C08G5.4	C08G5.4	0,188132	0,105654	1.78064	0.832398
C08G5.5	C08G5.5	C08G5.5	0,292125	0,190596	1.53269	0.616068
C08G5.6	C08G5.6	C08G5.6	0,027628	0,015674	1.76265	0.817742
C08G5.7	C08G5.7	C08G5.7a	0,074375	0,316866	0.234721	-2.09098		1
C08G5.7	C08G5.7	C08G5.7b	0,018514	0,025731	0.719525	-0.474883
C08G9.1	C08G9.1	C08G9.1	1,50433	0,825679	1.82193	0.865468
C08G9.2	C08G9.2	C08G9.2	0,036451	0,004559	7.99542	2.99917	1
C08H9.1	C08H9.1	C08H9.1	0,008646	0,001604	5.39052	2.43042	1
C08H9.10	C08H9.10	C08H9.10	0,000579	0,000268	2.16186	1.11227
C08H9.11	C08H9.11	C08H9.11	0,002002	0,00151	1.32569	0.406742
C08H9.12	C08H9.12	C08H9.12	0,000913	0,000238	3.83816	1.94042	1
C08H9.13	C08H9.13	C08H9.13	0,000731	0,000451	1.62024	0.696205
C08H9.14	C08H9.14	C08H9.14	0,001396	0,001096	1.27381	0.349154
C08H9.15	C08H9.15	C08H9.15	0,798558	0,829589	0.962595	-0.0549996
C08H9.2	C08H9.2	C08H9.2	10,4057	6,14213	1.69415	0.760563
C08H9.3	C08H9.3	C08H9.3a	0,442741	0,175163	2.52759	1.33776
C08H9.3	C08H9.3	C08H9.3b	0,250199	0,143669	1.7415	0.800327
C08H9.4	C08H9.4	C08H9.4a	0	0,00827	0
C08H9.4	C08H9.4	C08H9.4b	0,000511	0,002636	0.193909	-2.36655		1
old-1	C08H9.5	C08H9.5	0,002933	0,000907	3.23387	1.69326	1
C08H9.6	C08H9.6	C08H9.6	0,000589	0,000282	2.08912	1.06289
C08H9.7	C08H9.7	C08H9.7	0,003059	0,005927	0.51603	-0.954473
C08H9.8	C08H9.8	C08H9.8	0	0
ser-7	C09B7.1	C09B7.1a	0,054449	0,017931	3.0366	1.60246
ser-7	C09B7.1	C09B7.1b	0,055297	0,016917	3.26874	1.70874	1
ser-7	C09B7.1	C09B7.1c	0,053838	0,015925	3.38075	1.75734	1
C09B7.2	C09B7.2	C09B7.2	0,783064	0,931758	0.840416	-0.250825
ipp-5	C09B8.1	C09B8.1	0,315136	0,239517	1.31571	0.395847
C09B8.3	C09B8.3	C09B8.3	0,009156	0,001307	7.00523	2.80843	1
C09B8.4	C09B8.4	C09B8.4	0,07683	0,000745	103.128	6.68829	1
C09B8.5	C09B8.5	C09B8.5	0,063353	0,026687	2.37392	1.24727
hsp-25	C09B8.6	C09B8.6a	4,88466	2,7518	1.77508	0.827883
hsp-25	C09B8.6	C09B8.6b	5,10517	2,78359	1.83402	0.875012
hsp-25	C09B8.6	C09B8.6c.1	2,09104	2,12845	0.982424	-0.0255825
hsp-25	C09B8.6	C09B8.6c.2	2,13929	2,13638	1.00136	0.00196378
hsp-25	C09B8.6	C09B8.6c.3	1,59944	1,97525	0.809741	-0.304468
hsp-25	C09B8.6	C09B8.6c.4	5,10517	2,78359	1.83402	0.875012
pak-1	C09B8.7	C09B8.7a.1	1,02742	0,596839	1.72144	0.783612
pak-1	C09B8.7	C09B8.7a.2	1,02787	0,595996	1.72463	0.786283
pak-1	C09B8.7	C09B8.7b	0,938533	0,57705	1.62643	0.701711
pak-1	C09B8.7	C09B8.7c.1	0,938533	0,57705	1.62643	0.701711
pak-1	C09B8.7	C09B8.7c.2	1,02453	0,559645	1.83068	0.872378
pak-1	C09B8.7	C09B8.7e.1	0,727416	0,530581	1.37098	0.455208
pak-1	C09B8.7	C09B8.7e.2	0,938495	0,578247	1.623	0.698663
pak-1	C09B8.7	C09B8.7e.3	0,938533	0,57705	1.62643	0.701711
C09B8.8	C09B8.8	C09B8.8	0,044624	0,047784	0.933869	-0.0987078
C09B9.1	C09B9.1	C09B9.1	0,038555	0,014687	2.62514	1.39239
C09B9.2	C09B9.2	C09B9.2	0,002864	0,005919	0.483933	-1.04712
C09B9.3	C09B9.3	C09B9.3	0,000499	0,000091	5.48409	2.45525	1
C09B9.4	C09B9.4	C09B9.4	0,008002	0,002273	3.52066	1.81585	1
msp-55	C09B9.6	C09B9.6	0,015416	0,01852	0.832376	-0.264693
C09B9.7	C09B9.7	C09B9.7	0,000713	0,000094	7.59003	2.92411	1
C09B9.8	C09B9.8	C09B9.8	0,097116	0,063911	1.51955	0.603642
zig-4	C09C7.1	C09C7.1	0,281798	0,094771	2.97346	1.57214
unc-89	C09D1.1	C09D1.1a	0,327269	0,155877	2.09953	1.07007
unc-89	C09D1.1	C09D1.1b	0,308187	0,148452	2.076	1.05381
unc-89	C09D1.1	C09D1.1c	0,249647	0,12222	2.0426	1.03041
unc-89	C09D1.1	C09D1.1d	0,25066	0,12185	2.05712	1.04063
unc-89	C09D1.1	C09D1.1e	0,347096	0,165275	2.10011	1.07047
unc-89	C09D1.1	C09D1.1f	0,334263	0,158421	2.10997	1.07722
unc-89	C09D1.1	C09D1.1g	0,324131	0,155243	2.08789	1.06205
C09D1.2	C09D1.2	C09D1.2	0,008649	0,000606	14.2724	3.83515	1
C09D4.1	C09D4.1	C09D4.1a	0,196349	0,12568	1.56229	0.643665
C09D4.1	C09D4.1	C09D4.1b.1	0,205051	0,120657	1.69945	0.765071
C09D4.1	C09D4.1	C09D4.1b.2	0,205105	0,120681	1.69956	0.765164
C09D4.2	C09D4.2	C09D4.2	2,22695	1,81916	1.22416	0.291797
C09D4.3	C09D4.3	C09D4.3	0,024279	0,004543	5.34438	2.41802	1
C09D4.4	C09D4.4	C09D4.4a	1,00058	0,414216	2.4156	1.27238
C09D4.4	C09D4.4	C09D4.4b	0,999945	0,407962	2.45107	1.29341
C09D4.4	C09D4.4	C09D4.4c	0,916662	0,410042	2.23553	1.16062
rpl-19	C09D4.5	C09D4.5.1	93,5426	120,031	0.77932	-0.359712
rpl-19	C09D4.5	C09D4.5.2	93,3701	118,349	0.788939	-0.342015
rpl-19	C09D4.5	C09D4.5.3	95,3778	152,245	0.626476	-0.674669
rpl-19	C09D4.5	C09D4.5.4	93,0348	118,126	0.78759	-0.344484
C09D4.6	C09D4.6	C09D4.6	0	0,001057	0
ptp-3	C09D8.1	C09D8.1a	0,959131	0,424786	2.25792	1.17499
ptp-3	C09D8.1	C09D8.1b	1,30555	0,557537	2.34164	1.22752
ptp-3	C09D8.1	C09D8.1c	1,34264	0,546242	2.45796	1.29746
dgk-1	C09E10.2	C09E10.2a	0,159078	0,088354	1.80046	0.848367
dgk-1	C09E10.2	C09E10.2b	0,1589	0,088787	1.78968	0.839699
dgk-1	C09E10.2	C09E10.2c	0,15094	0,087708	1.72094	0.783195
dgk-1	C09E10.2	C09E10.2d	0,150745	0,088244	1.70827	0.77254
dgk-1	C09E10.2	C09E10.2e	0,159497	0,085606	1.86315	0.897745
srxa-5	C09E7.1	C09E7.1	0	0,000417	0
C09E7.10	C09E7.10	C09E7.10	0,010665	0,001657	6.43609	2.68618	1
pqn-10	C09E7.2	C09E7.2	0,012888	0,002214	5.82114	2.5413	1
oig-1	C09E7.3	C09E7.3	0,080311	0,067471	1.1903	0.25133
C09E7.4	C09E7.4	C09E7.4	0,141191	0,093002	1.51815	0.602314
[truncated: 25,323 more rows]
