# Supplementary material for: A Comprehensive Analysis of Gene Expression Changes Provoked by Bacterial and Fungal Infection in C. elegans
Source: PLoS One. 2011 May 13;6(5):e19055. doi: 10.1371/journal.pone.0019055 (PMC3094335; doi:10.1371/journal.pone.0019055)
Supplement: Table S9 — Lists of differentially regulated genes. Lists of up- or down-regulated genes (WS210) after infection with different pathogens, established by RNA-seq (A), tiling arrays (B), oligo-arrays (C) and cDNA-arrays (D). (XLS) [file pone.0019055.s013.xls]

## Sheet: TableS9A
RNA-seq
Up-regulated genes WS210						Down-regulated genes WS210
S. marcescens 24h	E. faecalis 24h	P.luminescens 24h	D. coniospora 12h	Harposporium 24h		S. marcescens 24h	E. faecalis 24h	P.luminescens 24h	D. coniospora 12h	Harposporium 24h
AC3.8	4R79.1	4R79.1	6R55.2	4R79.1		2RSSE.2	AH10.4	6R55.2	AC3.5	2RSSE.1
AH10.1	AC3.1	AC3.1	AH9.4	AC3.10		4R79.2	B0205.12	AH10.4	AC3.6	2RSSE.2
AH10.3	AC3.10	AC3.3	B0034.7	AC7.3		AH10.4	B0205.5	B0034.7	AH6.7	4R79.2
AH6.10	AC3.3	AC7.1	B0035.18	AH10.2		B0047.1	B0207.10	B0205.12	AH9.1	AH9.1
AH6.7	AC3.6	AH10.1	B0035.8	AH6.3		B0205.12	B0213.17	B0205.5	B0024.1	AH9.4
B0024.1	AC3.8	AH10.3	B0041.1	B0024.6		B0207.10	B0213.2	B0213.15	B0024.6	B0024.12
B0024.15	AC7.1	AH6.10	B0205.2	B0034.1		B0213.15	B0213.3	B0213.16	B0047.4	B0034.3
B0024.4	AH10.1	B0024.1	B0205.4	B0034.4		B0213.17	B0213.4	B0213.2	B0198.3	B0035.8
B0034.4	AH10.3	B0024.14	B0207.10	B0034.7		B0213.2	B0213.6	B0213.3	B0207.2	B0041.4
B0035.13	AH6.10	B0024.15	B0207.3	B0035.16		B0213.3	B0238.15	B0213.4	B0207.5	B0047.2
B0035.2	B0024.1	B0024.3	B0212.6	B0035.4		B0222.3	B0261.5	B0284.3	B0222.1	B0198.3
B0035.8	B0024.15	B0024.4	B0213.11	B0047.1		B0240.2	B0284.3	B0331.1	B0228.1	B0205.5
B0205.4	B0024.3	B0024.6	B0213.15	B0047.4		B0261.6	B0304.9	B0412.4	B0228.4	B0212.1
B0213.12	B0024.6	B0034.3	B0213.16	B0205.12		B0272.1	B0348.2	B0464.3	B0244.10	B0213.15
B0218.2	B0034.3	B0034.5	B0213.17	B0205.13		B0273.1	B0412.4	B0513.9	B0244.7	B0218.8
B0218.6	B0034.4	B0035.5	B0213.2	B0205.14		B0273.3	B0462.3	B0524.2	B0252.3	B0222.7
B0222.4	B0034.5	B0198.3	B0213.3	B0207.11		B0284.3	B0464.3	B0563.8	B0272.1	B0222.8
B0222.7	B0205.10	B0205.10	B0213.4	B0207.7		B0412.2	B0495.6	B0563.9	B0286.3	B0244.2
B0222.9	B0205.4	B0205.13	B0213.5	B0213.2		B0412.4	B0496.7	C01B10.5	B0294.1	B0250.1
B0244.10	B0207.1	B0205.4	B0213.6	B0213.6		B0414.1	B0507.4	C01C4.2	B0294.3	B0272.1
B0252.5	B0207.12	B0213.12	B0228.5	B0222.10		B0496.7	B0513.9	C01G5.7	B0303.16	B0273.2
B0280.4	B0207.5	B0218.2	B0238.15	B0228.5		B0511.1	B0563.8	C02B4.4	B0304.3	B0273.3
B0281.1	B0207.7	B0218.5	B0238.6	B0240.1		B0513.3	C01B10.5	C02B8.1	B0310.5	B0273.4
B0281.3	B0212.6	B0218.8	B0250.2	B0244.4		B0563.5	C01F6.9	C02F12.10	B0334.6	B0280.2
B0281.6	B0213.10	B0222.2	B0284.1	B0244.7		B0563.9	C01G6.2	C03A7.12	B0336.11	B0280.7
B0286.3	B0213.12	B0222.4	B0284.2	B0252.1		B0564.3	C02B10.2	C03A7.2	B0336.9	B0284.4
B0302.5	B0218.5	B0222.7	B0284.3	B0252.8		B0564.4	C03G5.7	C03G5.11	B0344.2	B0302.2
B0303.8	B0218.6	B0238.12	B0285.3	B0281.4		BE10.3	C03G5.8	C03G5.2	B0365.5	B0302.4
B0304.3	B0218.7	B0240.2	B0286.2	B0286.6		BE10.4	C04H5.1	C03G5.7	B0391.4	B0310.6
B0310.5	B0222.1	B0240.3	B0303.8	B0303.8		C01B10.5	C05C8.8	C03G5.8	B0393.5	B0331.2
B0336.11	B0222.10	B0244.5	B0310.3	B0304.5		C01B7.5	C06B8.8	C04E6.10	B0399.1	B0336.2
B0344.2	B0222.4	B0250.1	B0334.1	B0304.9		C01G5.7	C06C3.7	C04F6.1	B0403.3	B0348.5
B0365.5	B0222.7	B0250.9	B0348.2	B0334.1		C01G6.2	C06C6.8	C04H5.1	B0410.3	B0350.2
B0365.6	B0228.4	B0252.2	B0379.6	B0348.2		C02B4.4	C06E4.6	C05C8.8	B0412.1	B0391.4
B0393.4	B0238.12	B0252.5	B0391.9	B0365.5		C03B1.10	C06G3.11	C05E4.14	B0432.5	B0391.5
B0393.5	B0238.13	B0272.4	B0412.4	B0379.2		C03B8.2	C06G3.3	C05E4.3	B0454.2	B0393.4
B0395.2	B0240.1	B0273.2	B0414.1	B0391.9		C03C10.9	C07A4.3	C06B8.4	B0454.3	B0412.1
B0399.2	B0240.2	B0280.11	B0416.2	B0395.1		C03G5.7	C07A9.2	C06B8.8	B0478.1	B0432.5
B0403.5	B0240.3	B0280.12	B0454.4	B0399.2		C03G6.17	C07D10.6	C06C3.7	B0478.3	B0454.8
B0412.1	B0244.10	B0280.2	B0495.6	B0414.2		C04C3.5	C07G1.7	C06C6.2	B0491.2	B0462.1
B0416.4	B0244.5	B0280.7	B0496.6	B0416.7		C04F12.3	C07H6.2	C06E1.5	B0495.4	B0495.8
B0454.8	B0250.1	B0285.9	B0507.6	B0457.6		C04F12.4	C08B6.10	C06E2.9	B0496.1	B0496.3
B0491.2	B0250.9	B0286.2	B0507.8	B0462.4		C04F6.3	C08E3.13	C06G3.11	B0496.2	B0507.10
B0495.4	B0252.5	B0294.1	B0513.3	B0464.3		C04H5.3	C08E3.3	C06G3.3	B0496.3	B0507.7
B0496.3	B0261.6	B0302.2	B0513.9	B0478.3		C05B5.4	C08F11.11	C07D10.6	B0524.4	B0507.8
B0507.7	B0280.11	B0303.7	B0563.9	B0495.4		C05E11.4	C08F11.17	C07G3.10	B0554.2	B0524.2
B0554.6	B0280.12	B0303.8	B0564.3	B0496.6		C05E4.14	C08F11.4	C07G3.6	B0554.7	B0554.6
BE10.2	B0280.13	B0304.3	C01B10.7	B0496.7		C05E4.9	C09H10.2	C07H6.2	B0563.2	B0564.4
C01B10.10	B0280.7	B0304.8	C01F1.5	B0511.4		C05E7.3	C10G8.4	C08B6.1	C01B10.3	BE0003N10.3
C01B10.11	B0285.6	B0331.2	C01G10.18	B0513.4		C05G5.5	C13D9.9	C08B6.10	C01B10.5	C01B7.1
C01B10.4	B0286.2	B0334.6	C01G12.11	B0513.9		C06A1.3	C13F10.1	C08B6.2	C01B12.1	C01F1.5
C01B10.6	B0294.1	B0344.2	C01G12.5	B0554.4		C06B8.8	C13F10.2	C08E3.13	C01B9.1	C01G12.7
C01B12.1	B0294.3	B0348.5	C01G12.6	B0563.8		C06C6.8	C14A4.9	C08E3.7	C01F1.3	C01G6.1
C01B12.8	B0304.3	B0348.6	C01G12.9	B0563.9		C06E1.5	C14B9.10	C08F11.11	C01G10.4	C02B10.5
C01B7.3	B0304.7	B0361.11	C01G5.7	C01A2.6		C06E1.6	C14C11.7	C08F11.12	C01G5.9	C02B10.6
C01B9.1	B0331.2	B0365.5	C02B4.4	C01B10.10		C06E2.3	C14E2.2	C08F11.4	C01H6.2	C02B4.1
C01F1.3	B0344.2	B0365.6	C02B8.1	C01B10.4		C06E2.9	C16C2.1	C08G5.7	C01H6.8	C02C2.5
C01F1.5	B0348.5	B0365.7	C02E7.13	C01B10.5		C06G3.3	C16C4.17	C08H9.4	C02B4.2	C02D4.1
C01F6.6	B0348.6	B0393.4	C02E7.7	C01B12.5		C08A9.8	C16C4.6	C09H10.1	C02C2.5	C02D5.1
C01G10.17	B0361.11	B0393.5	C02F4.4	C01B12.8		C08B6.4	C17C3.4	C09H10.2	C02D4.1	C02F12.1
C01G10.18	B0365.7	B0395.2	C02F5.11	C01F6.9		C08E3.6	C17E7.12	C10F3.7	C02D4.2	C02G6.2
C01G10.4	B0379.7	B0399.2	C03G5.8	C01G10.15		C08E3.7	C17F3.3	C10G8.4	C02D5.1	C03A7.14
C01G5.9	B0393.4	B0403.3	C03G6.12	C01G10.17		C08E3.8	C17F4.11	C10G8.7	C02D5.2	C03A7.2
C01G6.7	B0393.5	B0403.5	C03G6.8	C01G10.6		C08E8.11	C17F4.7	C12D8.12	C02E7.1	C03B8.1
C01H6.1	B0393.7	B0412.1	C04E6.13	C01G12.9		C08F1.10	C17H11.5	C12D8.6	C02F5.8	C03B8.2
C01H6.4	B0395.2	B0412.2	C04E6.8	C01G5.7		C08F11.11	C18A3.9	C12D8.9	C02G6.1	C03C10.2
C01H6.8	B0412.1	B0416.2	C04F12.6	C01G6.7		C08F8.4	C18D11.6	C13F10.2	C02H6.1	C03E10.3
C02B4.1	B0412.2	B0432.1	C04F5.6	C01H6.3		C08F8.8	C23G10.11	C14B9.10	C02H7.1	C03F11.1
C02B8.5	B0432.1	B0454.8	C04G2.4	C02B10.2		C08F8.9	C23H5.3	C14E2.2	C02H7.2	C03H5.4
C02C2.4	B0432.5	B0491.2	C04G6.5	C02C2.4		C08G5.7	C24H11.3	C14F11.7	C03A3.1	C03H5.6
C02D4.1	B0454.6	B0495.4	C04H4.1	C02D5.3		C09C7.1	C24H11.5	C15H7.4	C03A3.3	C04D8.1
C02D5.1	B0454.7	B0496.2	C05B5.1	C02F5.10		C09F12.2	C24H12.12	C16A11.8	C03A7.3	C04E12.11
C02E7.2	B0454.8	B0507.1	C05B5.5	C02F5.11		C09F12.3	C24H12.8	C16C8.17	C03B1.2	C04E12.12
C02F4.4	B0462.1	B0507.6	C05B5.8	C02F5.14		C09H10.2	C25A8.1	C16C8.7	C03F11.1	C04F6.3
C02F5.11	B0491.4	B0507.7	C05B5.9	C02F5.2		C09H10.5	C25A8.2	C16D9.5	C03F11.4	C04G2.11
C02F5.14	B0491.8	B0507.8	C05E4.14	C02F5.5		C10A4.8	C25B8.4	C17E7.1	C03H5.6	C04G2.2
C02F5.8	B0495.1	B0511.2	C05E7.3	C02F5.8		C10C5.7	C25E10.9	C17E7.12	C03H5.7	C04G2.7
C02G6.1	B0495.4	B0511.5	C05E7.4	C02G6.3		C10G11.8	C25F9.12	C17F4.11	C04C3.3	C04G6.13
C02H6.2	B0496.2	B0523.5	C06A12.4	C02H6.2		C10G8.2	C25F9.13	C18A11.2	C04C3.6	C04H5.3
C03B1.14	B0507.1	B0554.5	C06B3.13	C03B1.5		C10G8.5	C25H3.6	C18A3.7	C04E12.4	C05A9.2
C03B1.2	B0507.11	B0554.6	C06B8.8	C03B1.6		C10H11.5	C26E1.1	C18A3.9	C04E12.5	C05B5.4
C03B8.3	B0507.7	B0554.7	C06C6.3	C03G5.2		C10H11.7	C26F1.9	C18H7.9	C04E12.7	C05B5.6
C03D6.1	B0507.9	BE10.1	C06C6.5	C03G5.8		C11E4.2	C27A7.8	C23G10.10	C04E6.12	C05B5.9
C03E10.3	B0511.2	BE10.2	C06C6.6	C03G6.19		C12D8.12	C27A7.9	C23G10.11	C04E6.2	C05C8.8
C03E10.5	B0511.4	C01A2.6	C06C6.8	C03G6.5		C12D8.14	C27B7.9	C23H5.1	C04E6.4	C05C9.2
C03F11.3	B0524.4	C01B10.11	C06E2.9	C03G6.8		C12D8.9	C28H8.1	C23H5.3	C04E6.6	C05D10.1
C03G6.18	B0547.4	C01B10.6	C06E4.3	C03H5.5		C14A4.1	C29E4.12	C24B9.9	C04F5.3	C05D12.2
C03G6.19	B0554.5	C01B12.1	C06E4.6	C04C3.1		C14B9.1	C29F9.13	C24D10.2	C04F5.7	C05E11.4
C04E12.5	B0554.7	C01B12.3	C06E4.8	C04E6.12		C14B9.10	C30F2.1	C24G7.1	C04G6.1	C05E4.7
C04F1.1	B0563.2	C01B12.5	C06E7.6	C04E6.4		C14C11.7	C30G7.4	C24H11.5	C04G6.10	C05E4.9
C04F12.7	B0564.3	C01B12.8	C06G3.11	C04F1.1		C14C11.8	C31A11.10	C25A8.2	C05A9.1	C06A5.2
C04F5.7	BE10.1	C01B7.4	C06G3.3	C04F5.3		C15F1.7	C31C9.7	C25E10.2	C05B5.4	C06B3.2
C04G2.9	BE10.2	C01F1.3	C06H5.2	C04F5.7		C16C2.1	C31H5.4	C25E10.3	C05C8.3	C06B8.10
C04G6.1	C01A2.7	C01F1.5	C07D10.3	C04G2.5		C16C4.15	C32B5.15	C25H3.6	C05C9.3	C06B8.7
C05A9.1	C01B10.4	C01F6.6	C07D8.2	C04G6.1		C16D2.1	C32B5.5	C26B2.4	C05D10.2	C06C3.3
C05B5.5	C01B10.6	C01G10.1	C07D8.5	C04G6.5		C17B7.10	C32C4.5	C26E1.1	C05D11.5	C06E1.4
C05C10.4	C01B12.3	C01G10.18	C07E3.5	C04H5.8		C17C3.19	C33B4.4	C26F1.9	C05D12.3	C06E2.1
C05C12.3	C01B12.5	C01G10.4	C07G3.10	C05A9.1		C17F3.1	C33G8.3	C27A7.8	C05D2.4	C06E8.5
C05C12.4	C01B7.3	C01G12.1	C08A9.9	C05B5.1		C17F4.11	C35B1.3	C27B7.9	C05E11.4	C06G1.4
C05C8.7	C01B9.1	C01G12.10	C08D8.1	C05B5.3		C17F4.6	C35B1.4	C27D6.12	C05E11.5	C06H2.5
C05D11.6	C01F1.4	C01G12.11	C08E3.10	C05B5.5		C17G10.6	C35C5.9	C28H8.8	C05E11.7	C07A12.7
C05D12.3	C01F1.5	C01G12.2	C08E3.13	C05C12.4		C18A11.2	C35D10.17	C29E4.14	C05E7.1	C07G1.1
C05D12.4	C01G10.1	C01G12.6	C08E3.5	C05C12.6		C18A3.9	C36B1.14	C29F9.13	C05E7.2	C07G1.2
C05D12.5	C01G12.10	C01G12.8	C08E3.6	C05D9.9		C18C4.7	C36B7.1	C29F9.2	C05G5.3	C07G1.7
C05D2.4	C01G12.2	C01G5.3	C08E3.9	C05E4.12		C18D11.6	C36C5.12	C30E1.3	C06A8.1	C07G3.8
C05D2.8	C01G12.6	C01G5.4	C08F8.9	C05E4.13		C18D4.3	C36C5.5	C30E1.6	C06B3.2	C08A9.3
C05D9.2	C01G12.8	C01G6.7	C08G5.7	C06A1.2		C18H2.1	C38C10.6	C31A11.4	C06B3.3	C08C3.4
C05E11.5	C01G5.2	C01G8.1	C08H9.11	C06A12.5		C18H2.4	C39B10.3	C31A11.6	C06B3.7	C08E3.10
C05E11.7	C01G5.3	C01H6.1	C08H9.7	C06A6.7		C18H7.1	C39B10.6	C31B8.12	C06C3.3	C08E3.13
C05E7.2	C01G5.4	C01H6.5	C09B8.8	C06A8.6		C23G10.1	C39E9.9	C31B8.2	C06E1.3	C08E3.6
C06B3.2	C01G8.1	C01H6.8	C09B9.6	C06A8.8		C23G10.10	C40A11.3	C31C9.7	C06E1.4	C08E3.8
C06B3.3	C01H6.1	C02B4.1	C09G12.17	C06B3.3		C23G10.11	C42C1.14	C31H5.4	C06E1.5	C08F11.14
C06B3.8	C02A12.1	C02B8.5	C09G9.8	C06B3.7		C24A11.1	C43F9.4	C32B5.17	C06E1.7	C08G5.4
C06B8.1	C02B8.3	C02D4.1	C09H10.2	C06C6.7		C24B9.9	C43H6.8	C32H11.3	C06E1.8	C08G9.2
C06B8.2	C02B8.5	C02D4.2	C09H10.5	C06E1.5		C24H11.5	C44B11.6	C33B4.4	C06E2.1	C08H9.1
C06C3.6	C02C2.4	C02D5.1	C09H5.2	C06E1.6		C24H12.1	C44B9.6	C33G8.3	C06E2.8	C08H9.10
C06E1.3	C02D4.1	C02D5.2	C09H5.5	C06E1.7		C24H12.2	C44E4.6	C34D4.11	C06E7.1	C08H9.11
C06E1.7	C02D4.2	C02E7.1	C10G8.2	C06E2.9		C25A6.1	C45B2.2	C34E11.4	C06G1.2	C08H9.14
C06E1.8	C02D5.1	C02E7.6	C10G8.3	C06E4.2		C25A8.2	C45B2.3	C35B1.3	C06G1.5	C08H9.7
C06E2.1	C02D5.2	C02E7.7	C10G8.7	C06E7.1		C25B8.4	C45B2.8	C35B1.4	C06H2.5	C09E10.2
C06E4.3	C02D5.3	C02F12.1	C11D2.2	C06E7.6		C25F9.13	C45G9.12	C35C5.9	C06H5.6	C09E7.2
C06E7.6	C02E7.1	C02F4.4	C12D5.11	C06G3.8		C25F9.2	C46G7.1	C35D10.17	C07A4.2	C09E8.2
C06G1.1	C02E7.4	C02F5.11	C12D8.16	C06G4.4		C25G6.1	C47D12.4	C35D10.3	C07A9.11	C09E8.3
C06G8.3	C02E7.5	C02F5.12	C13D9.1	C06G8.1		C25G6.4	C47E12.12	C35E7.7	C07A9.4	C09F12.3
C06H2.4	C02F12.1	C02F5.14	C13F10.2	C07A9.13		C25H3.1	C47E8.11	C36A4.11	C07A9.6	C09F9.2
C06H5.1	C02G6.1	C02F5.5	C14A11.2	C07A9.8		C25H3.6	C47G2.1	C36B7.3	C07B5.6	C09G1.4
C07A9.11	C02H7.2	C02F5.8	C14B9.10	C07D10.6		C26B2.4	C48B6.10	C36C5.12	C07D10.6	C09G12.8
C07A9.4	C03A3.1	C02G6.1	C15A11.7	C07E3.10		C26F1.4	C48E7.10	C36C5.5	C07F11.2	C09G5.4
C07A9.6	C03A3.3	C02H6.1	C15A7.2	C07G1.6		C26F1.9	C48E7.11	C37H5.10	C07G3.2	C09G5.6
C07A9.8	C03A7.14	C02H7.2	C15B12.3	C07G3.2		C27A12.5	C49D10.11	C38D9.6	C07G3.8	C09G9.3
C07B5.6	C03A7.9	C03A3.1	C15C8.6	C07G3.3		C27A2.2	C49F5.7	C39B10.6	C08A9.1	C09H10.7
C07E3.10	C03B1.2	C03A3.3	C15H9.1	C07H6.9		C27A7.8	C49H3.3	C39B5.10	C08B6.1	C09H10.8
C07E3.5	C03C10.2	C03A7.14	C15H9.2	C08B6.10		C27A7.9	C50F2.1	C39E9.5	C08B6.4	C09H10.9
C07G1.1	C03G6.12	C03A7.8	C16B8.2	C08C3.3		C27D6.3	C50F2.10	C40H1.2	C08C3.3	C09H5.4
C07H6.9	C03G6.13	C03A7.9	C16C4.12	C08D8.2		C27D9.2	C50F2.9	C40H1.5	C08E8.1	C10A4.8
C08B6.11	C03G6.14	C03B1.2	C16C4.13	C08E3.3		C27H5.6	C50F4.5	C40H1.9	C08E8.11	C10C6.2
C08B6.3	C03G6.15	C03C10.2	C16C8.8	C08E3.5		C28A5.4	C50F4.6	C44B11.4	C08F11.12	C10E2.4
C08E3.10	C03G6.17	C03C10.7	C16D9.9	C08E8.11		C29F9.13	C50F4.9	C44B11.6	C08F11.4	C10G11.10
C08F1.4	C03H5.6	C03E10.3	C16H3.1	C08E8.4		C30B5.3	C50F7.2	C44B12.3	C08H9.1	C10G11.9
C08F1.5	C04A11.1	C03G6.14	C17A2.1	C08F11.1		C30B5.7	C51E3.10	C44B12.9	C08H9.14	C11G10.2
C08F11.1	C04C3.2	C03G6.19	C17A2.8	C08F11.11		C30G4.7	C53A5.11	C44H9.1	C08H9.5	C11H1.5
C08F11.13	C04E12.12	C03H5.7	C17B7.10	C08G5.7		C30G7.1	C53B4.5	C45B2.3	C09D1.1	C11H1.8
C08F11.5	C04E12.2	C04B4.1	C17B7.8	C08H9.13		C30H6.10	C53B7.2	C45E5.2	C09D1.2	C12D5.10
C08F11.8	C04E12.4	C04E12.2	C17C3.4	C09B8.3		C31A11.4	C53C11.1	C45G7.3	C09D4.6	C12D5.8
C08F8.7	C04E6.10	C04E12.5	C17C3.9	C09B8.4		C31A11.6	C53C11.2	C45H4.10	C09E10.2	C12D8.12
C08H9.1	C04E6.2	C04E12.7	C17E7.1	C09D1.2		C31H1.5	C54C6.1	C46G7.1	C09E7.2	C12D8.16
C09B8.4	C04E6.5	C04E6.12	C17E7.12	C09D4.5		C31H2.3	C54C8.12	C46H3.1	C09E8.2	C13C4.4
C09D1.2	C04F12.7	C04F1.1	C17F3.1	C09E7.3		C31H5.4	C54C8.7	C47A10.12	C09G4.2	C13D9.3
C09E7.10	C04F5.2	C04F5.2	C17G10.6	C09F12.1		C32B5.1	C54C8.9	C47E12.12	C09G5.5	C14A11.5
C09E8.2	C04G2.2	C04G2.2	C17H1.4	C09G12.1		C32B5.12	C54D2.6	C47F8.7	C09G5.6	C14A4.15
C09F12.1	C04G2.4	C04G2.8	C17H1.5	C09G12.17		C32D5.4	C54F6.15	C48E7.10	C10A4.4	C14A6.5
C09G12.1	C04G2.8	C04G2.9	C17H1.6	C09G12.5		C32E8.1	C54F6.5	C48E7.11	C10A4.6	C14C11.1
C09G5.3	C04G2.9	C04G6.1	C17H1.9	C09G4.4		C33A12.4	C54G10.1	C49A1.2	C10E2.1	C14E2.2
C09G5.5	C04G6.1	C04G6.10	C17H12.11	C09G5.5		C33D9.5	C54G6.5	C49A1.5	C10F3.7	C14F11.2
C09G9.3	C04G6.10	C04G6.13	C18A11.1	C09G9.5		C33H5.12	C54G7.1	C49F5.7	C10G8.5	C15A7.2
C09H5.2	C04G6.7	C04G6.7	C18A3.7	C09H5.5		C34D1.1	C55A1.6	C50F4.6	C10H11.6	C15C6.3
C10C5.5	C04H5.3	C04H5.3	C18B2.2	C10C5.2		C34D4.11	D1007.19	C50H2.6	C11D2.6	C15F1.2
C10F3.6	C05B5.2	C05A9.1	C18C4.7	C10C5.3		C34E11.2	D1014.6	C52G5.3	C11E4.1	C16A11.7
C10G11.10	C05B5.6	C05B5.2	C18D11.6	C10C6.3		C34F11.4	D1025.9	C53C11.2	C11E4.2	C16B8.4
C10G8.3	C05C12.1	C05B5.6	C18G1.1	C10E2.5		C34F11.6	D1086.10	C53D6.8	C11H1.5	C16C10.9
C10H11.3	C05C12.5	C05C12.1	C18H7.1	C10G8.2		C35A5.2	D2007.1	C54D2.6	C12C8.1	C16C8.10
C10H11.4	C05C9.1	C05C9.1	C23G10.11	C10G8.4		C35C5.8	D2024.1	C54F6.14	C12C8.2	C16C8.2
C11H1.5	C05C9.2	C05C9.2	C23H3.7	C10H11.3		C35C5.9	D2089.3	C54F6.5	C12D12.1	C16D6.1
C11H1.9	C05C9.3	C05C9.3	C23H5.11	C10H11.6		C35D10.11	D2096.13	C54G6.5	C12D5.10	C17E7.1
C12C8.2	C05D10.2	C05D10.2	C23H5.7	C11D2.3		C36B1.13	E02C12.8	C55A1.6	C12D5.8	C17E7.8
C12D12.1	C05D11.6	C05D11.6	C24B5.5	C11E4.3		C36B7.3	E02H1.8	C56A3.2	C12D5.9	C17F3.3
C12D12.5	C05D12.1	C05D11.7	C24B9.9	C11G10.1		C36B7.8	E02H9.4	D1007.18	C12D8.5	C17F4.6
C12D8.18	C05D12.3	C05D12.1	C24D10.7	C11H1.4		C36C9.5	E04F6.8	D1014.6	C13C4.7	C17G10.6
C12D8.5	C05D2.3	C05D12.3	C24G7.1	C12C8.2		C36F7.4	E04F6.9	D1025.6	C13D9.7	C17H1.6
C13C12.2	C05E11.4	C05D9.2	C24G7.2	C12D5.2		C37A2.7	EGAP2.2	D1025.7	C14A11.5	C17H11.6
C13C4.1	C05E11.7	C05E11.7	C24H11.4	C12D8.18		C37A5.4	F01F1.14	D1025.8	C14A4.15	C18B2.6
C13C4.6	C05E4.11	C05E4.12	C24H11.5	C12D8.5		C37C3.12	F02A9.3	D1025.9	C14A4.9	C18C4.7
C13D9.1	C05E4.4	C05E7.1	C24H12.11	C12D8.9		C37C3.6	F02D10.1	D1065.4	C14B4.2	C18D4.2
C13D9.9	C06A12.4	C06A1.1	C24H12.8	C13C4.1		C37H5.10	F02E11.4	D1086.10	C14C11.5	C18F10.8
C14A11.5	C06A12.5	C06A5.2	C24H12.9	C13C4.7		C38C10.6	F02H6.3	D2096.13	C14C6.12	C18G1.6
C14A6.1	C06A5.2	C06B3.2	C25A1.2	C14A4.9		C38C3.4	F08B4.3	D2096.9	C14F11.7	C18H2.4
C14C11.3	C06A6.7	C06B3.3	C25B8.7	C14A6.8		C38D4.7	F08B6.2	E01G6.3	C14F5.3	C18H7.4
C14C11.4	C06A8.1	C06B3.7	C25B8.8	C14C11.5		C38D4.8	F08D12.11	E02H9.1	C14F5.4	C18H9.2
C14C6.12	C06A8.6	C06B3.8	C25D7.15	C14F11.7		C39B5.2	F08F1.4	E02H9.4	C14H10.1	C23F12.1
C14C6.2	C06A8.7	C06C3.3	C25E10.11	C14H10.4		C39E6.4	F09C12.6	E03G2.1	C15A11.1	C23F12.3
C14C6.5	C06B3.3	C06E1.3	C25E10.13	C15A11.3		C39E9.10	F09E10.1	E04A4.7	C15A11.4	C23H4.1
C14F11.6	C06B3.8	C06E1.7	C25E10.4	C15B12.5		C39E9.2	F09E5.14	E04F6.12	C15C7.1	C23H4.8
C14H10.3	C06C3.3	C06E1.8	C25E10.9	C15C8.2		C39F7.1	F09E8.8	E04F6.7	C15C7.4	C23H5.11
C15A11.3	C06C3.8	C06E2.1	C25F9.12	C15C8.3		C40A11.2	F09F3.7	E04F6.8	C15C8.5	C24A8.1
C15B12.7	C06C6.6	C06E7.1	C25F9.8	C15C8.7		C40C9.3	F09F7.6	E04F6.9	C15F1.1	C24B9.4
C15C6.1	C06E1.3	C06G1.1	C25G4.1	C15F1.8		C40H1.9	F10A3.6	F01F1.14	C15F1.2	C24G7.1
C15C7.5	C06E1.4	C06G1.2	C25G6.1	C15H11.13		C41H7.4	F10E9.11	F02D10.1	C15H9.7	C24H11.8
C15C7.6	C06E1.7	C06G1.5	C25G6.4	C15H7.3		C42C1.1	F10G7.11	F02D10.2	C16A3.10	C24H12.10
C15C7.7	C06E2.1	C06H2.5	C25H3.15	C15H7.4		C42C1.14	F11D11.7	F02E11.2	C16B8.1	C24H12.9
C15C8.3	C06E4.3	C07A4.2	C25H3.16	C15H9.11		C42C1.9	F11G11.11	F02E11.5	C16C2.1	C25B8.4
C15C8.4	C06E7.1	C07A9.4	C26F1.1	C16A11.8		C42D8.9	F11G11.13	F07C3.9	C16C4.4	C25B8.5
C15F1.2	C06E7.6	C07A9.8	C26F1.2	C16C4.13		C43D7.2	F12A10.9	F07C4.11	C16C8.17	C25B8.8
C15F1.6	C06G1.1	C07A9.9	C26F1.9	C16C4.7		C43H6.8	F12E12.1	F07C4.12	C16C8.2	C25E10.7
C15H11.13	C06G1.2	C07D10.3	C27A2.8	C16C8.17		C44B12.3	F12E12.5	F07G6.5	C16D6.2	C25F6.2
C15H11.2	C06H2.5	C07D8.2	C27A7.8	C16C8.5		C44B7.6	F12E12.7	F07G6.8	C16D9.2	C25F9.2
C15H9.7	C07A9.4	C07E3.3	C27B7.9	C16C8.7		C44H4.1	F12E12.8	F08B6.2	C16D9.5	C25F9.4
C16A3.10	C07A9.8	C07E3.5	C27C7.5	C16C8.8		C45B2.2	F12E12.9	F08G12.11	C16E9.4	C25G4.1
C16C10.13	C07C7.1	C07E3.8	C27F2.6	C16C8.9		C45B2.3	F12F6.10	F08H9.3	C17B7.5	C25G4.7
C16C4.5	C07D10.3	C07E3.9	C28C12.13	C16D2.1		C45B2.4	F13A7.13	F09C12.7	C17C3.1	C25G6.4
C16C8.10	C07D8.2	C07F11.2	C28C12.4	C16D9.4		C45B2.8	F13E6.3	F09C6.10	C17C3.11	C26B2.8
C16C8.2	C07E3.4	C07G1.1	C28F5.1	C16D9.9		C45E5.2	F13G3.10	F09E5.14	C17C3.12	C27A12.5
C16D9.2	C07E3.5	C07G1.2	C28G1.2	C17C3.1		C45E5.3	F13H10.6	F09F7.6	C17C3.15	C27D6.11
C16D9.4	C07F11.2	C07G2.1	C28H8.5	C17C3.11		C45G7.2	F13H10.8	F10A3.12	C17C3.18	C27D9.2
C16D9.5	C07G1.1	C07G2.3	C28H8.8	C17C3.12		C45G7.3	F13H8.12	F10A3.4	C17C3.19	C27H5.3
C16H3.2	C07G1.2	C07G3.2	C29A12.6	C17C3.15		C46A5.4	F14B8.4	F10D2.8	C17C3.6	C28A5.4
C17B7.11	C07G3.10	C07G3.3	C29E4.14	C17C3.18		C46G7.5	F14D2.7	F10D7.4	C17E7.6	C28C12.5
C17B7.5	C07G3.3	C07G3.5	C29E4.9	C17C3.19		C46H11.9	F15A4.10	F10E9.11	C17E7.8	C28D4.4
C17B7.8	C08B6.4	C07H6.9	C29F3.2	C17C3.4		C46H3.1	F15D3.5	F10G7.11	C17F4.10	C28D4.5
C17C3.1	C08E3.15	C08A9.9	C29F3.3	C17E4.4		C47D12.3	F15D4.3	F10G7.7	C17F4.2	C28H8.5
C17C3.12	C08F1.4	C08E3.10	C29F3.5	C17E7.12		C47D12.5	F15D4.6	F10G8.4	C17F4.4	C28H8.8
C17C3.15	C08F11.1	C08E3.15	C29F5.4	C17F3.1		C47E12.12	F15E6.10	F11E6.11	C17G1.6	C29E4.10
C17E7.8	C08F11.10	C08E3.3	C29G2.1	C17F4.12		C47E8.3	F15E6.3	F11G11.13	C17H11.1	C29E4.9
C17F4.2	C08F11.14	C08E3.4	C29G2.2	C17F4.2		C47E8.9	F15E6.4	F12E12.1	C17H11.4	C29E6.4
C17F4.7	C08F11.3	C08E8.4	C29G2.4	C17G10.7		C48B6.10	F15E6.8	F13E9.6	C17H12.14	C29F3.3
C17G1.2	C08F11.8	C08F11.10	C29G2.6	C17H1.4		C49A1.4	F16B4.7	F13G3.10	C17H12.6	C29F3.5
C17G1.3	C08F8.6	C08F11.14	C30A5.5	C17H1.5		C49F5.7	F16H9.2	F13H10.8	C17H12.9	C29F3.6
C17G10.5	C08G9.2	C08F8.6	C30E1.3	C17H11.5		C50E10.1	F17E9.10	F13H8.12	C18A11.7	C29F4.3
C17H1.3	C08H9.1	C08F8.7	C30F12.3	C17H12.10		C50F2.9	F17E9.12	F14B8.4	C18A3.6	C29F5.2
C17H1.5	C08H9.10	C08G9.2	C30F2.1	C17H12.4		C50F4.6	F18A11.3	F14D7.7	C18B12.3	C29F9.7
C17H1.6	C08H9.11	C08H9.1	C30G4.2	C17H12.6		C50F7.1	F19H6.3	F15A4.1	C18B2.1	C30F2.1
C17H1.7	C08H9.12	C08H9.12	C30G7.4	C17H12.8		C51E3.10	F20A1.8	F15A4.10	C18C4.2	C30G4.2
C17H1.9	C08H9.13	C08H9.5	C31B8.4	C18A11.1		C51E3.2	F20D1.10	F15D3.3	C18C4.3	C30G4.5
C17H12.12	C08H9.14	C09B7.1	C31E10.3	C18A11.2		C52A10.2	F22B3.1	F15D3.5	C18C4.7	C30G7.2
C17H12.4	C08H9.4	C09B8.3	C31G12.4	C18A3.10		C52A11.2	F22B3.2	F15E11.12	C18D4.2	C31G12.4
C17H12.5	C08H9.5	C09B8.4	C31H5.4	C18A3.7		C52D10.13	F22B7.2	F15E11.15	C18E3.7	C31H2.3
C17H12.6	C08H9.6	C09B9.3	C32A9.1	C18B10.6		C52E4.7	F22E5.20	F15E6.10	C18E9.5	C32A9.1
C17H12.8	C08H9.7	C09B9.4	C32B5.6	C18C4.7		C52G5.3	F22E5.4	F15E6.3	C18F10.2	C32B5.12
C18A11.3	C09B7.1	C09B9.7	C32B5.7	C18D11.7		C53B7.5	F22F1.1	F15E6.4	C18F10.5	C32B5.7
C18B10.6	C09B8.3	C09D1.2	C32B5.9	C18D4.4		C53C11.2	F22F4.5	F15E6.8	C18H2.4	C32B5.8
C18B2.1	C09B8.4	C09D4.3	C32E8.4	C18E3.4		C53C9.2	F23A7.1	F16B4.6	C18H7.13	C32B5.9
C18B2.2	C09B9.3	C09E7.10	C32E8.6	C18E9.4		C53D5.2	F23A7.4	F16B4.7	C18H7.2	C32C4.2
C18B2.5	C09B9.4	C09E7.2	C32H11.1	C18E9.5		C53D5.3	F23B2.13	F16G10.15	C23F12.1	C32C4.3
C18C4.3	C09B9.7	C09E8.2	C32H11.3	C18E9.9		C53H9.1	F23D12.7	F17B5.1	C23F12.3	C32E12.5
C18D1.2	C09D1.1	C09E8.3	C33A12.4	C18G1.1		C53H9.3	F23H11.5	F17C11.6	C23G10.6	C32E8.2
C18D11.7	C09D1.2	C09F12.1	C33E10.10	C18G1.2		C54C6.5	F25H5.8	F18A11.3	C23H3.2	C32E8.6
C18D4.2	C09D4.3	C09F12.3	C33E10.8	C18H7.11		C54C8.12	F26D11.12	F18E9.7	C23H4.7	C33A11.1
C18E9.5	C09E7.10	C09F9.2	C33F10.9	C18H9.5		C54C8.7	F26D11.13	F18E9.8	C23H5.1	C33B4.3
C18E9.8	C09E8.2	C09G1.1	C33G8.3	C18H9.6		C54C8.9	F26D2.12	F19B10.7	C23H5.9	C33D9.10
C18E9.9	C09E8.3	C09G1.2	C33H5.13	C23G10.11		C54E4.1	F26E4.6	F20D1.10	C24A11.9	C33E10.1
C18H7.11	C09F12.2	C09G12.1	C34B2.1	C23G10.5		C54F6.15	F26G1.2	F21A3.4	C24A3.6	C33E10.5
C18H9.6	C09F12.3	C09G12.17	C34C6.7	C23G10.6		C54F6.5	F27B3.6	F21C10.10	C24A8.1	C33H5.16
C23G10.6	C09F9.1	C09G5.1	C34D4.1	C23H4.4		C54G4.4	F28B4.1	F21C3.6	C24B9.4	C33H5.4
C23H4.2	C09G1.1	C09G5.3	C34D4.11	C23H5.8		C54G6.3	F28D1.11	F21D9.8	C24F3.6	C34B2.4
C23H4.3	C09G1.2	C09G9.3	C34D4.15	C24A3.2		C54G7.1	F28F5.4	F21F8.2	C24G6.7	C34E7.3
C23H4.4	C09G1.5	C09H5.2	C34F11.2	C24D10.2		C55A1.6	F28H6.8	F21H7.3	C24G7.4	C34F6.1
C23H4.7	C09G12.1	C09H5.5	C34F11.4	C24D10.5		C55C2.1	F29B9.10	F22A3.6	C24H12.10	C35B8.1
C23H5.1	C09G12.17	C09H5.7	C34F11.6	C24D10.7		C55C3.3	F30A10.11	F22B3.1	C25B8.5	C35D10.12
C23H5.7	C09G5.1	C10A4.5	C34G6.2	C24F3.3		C56G7.2	F30A10.13	F22B8.5	C25D7.4	C35D6.3
C23H5.8	C09G5.6	C10A4.7	C35A5.6	C24G7.4		D1007.18	F30H5.2	F22E5.7	C25E10.1	C35D6.4
C24A11.2	C09H10.8	C10C5.2	C35C5.9	C24H10.4		D1054.9	F31A9.2	F23A7.1	C25E10.3	C35E7.10
C24B5.3	C09H10.9	C10C5.3	C35D10.17	C25D7.5		D1065.1	F31D4.9	F23A7.4	C25F6.3	C36A4.5
C24F3.6	C09H5.2	C10C5.5	C35D10.3	C25E10.1		D2030.4	F31D5.6	F23B2.13	C25F6.4	C36B7.5
C24G6.7	C09H5.4	C10C6.2	C35E7.11	C25E10.13		D2063.4	F32D1.2	F23D12.11	C25F9.1	C36B7.8
C24G7.1	C09H5.6	C10F3.3	C36A4.10	C25E10.9		D2096.10	F33G12.7	F23D12.6	C25F9.2	C36C9.2
C24G7.2	C09H5.7	C10G11.10	C36B1.6	C25F9.10		D2096.9	F34H10.5	F23D12.7	C25F9.4	C36E6.1
C24H11.3	C10A4.5	C10G11.8	C36B7.3	C25F9.12		E_BE45912.2	F35C5.1	F23H11.5	C25G6.3	C36E6.8
C24H12.8	C10A4.7	C10H11.3	C36C5.12	C25H3.10		E01G6.1	F35E2.5	F25E5.13	C26B2.3	C36E8.2
C25A8.1	C10C5.5	C10H11.4	C36C5.6	C25H3.15		E02H9.4	F35E8.2	F25E5.9	C26B9.5	C36F7.4
C25A8.5	C10C6.2	C10H11.6	C37A5.2	C26B2.2		E02H9.6	F35G2.3	F26C11.4	C26B9.7	C37A5.1
C25B8.3	C10E2.6	C11E4.8	C37A5.8	C26B2.7		E04A4.6	F35H10.5	F26D10.12	C26C6.3	C37A5.4
C25D7.4	C10F3.3	C11H1.5	C37H5.10	C26B9.7		E04A4.7	F36A4.5	F26D11.9	C26D10.7	C37A5.8
C25E10.4	C10G11.8	C11H1.9	C37H5.9	C26C6.4		E04F6.8	F36D1.5	F26D2.12	C26E6.1	C37C3.7
C25F9.4	C10G8.5	C12C8.1	C38C3.8	C26C6.6		EEED8.7	F36F12.4	F26E4.6	C26F1.6	C37C3.8
C26B2.2	C10H11.3	C12C8.2	C38C5.1	C26F1.1		EGAP1.1	F36H5.11	F28A12.4	C26G2.1	C37F5.1
C26B2.3	C11D2.2	C12D12.1	C38C6.4	C26F1.3		EGAP5.1	F36H5.9	F28D1.11	C27A12.4	C37H5.13
C26B9.2	C11E4.2	C12D12.3	C38C6.6	C26F1.9		F01E11.1	F36H9.8	F28D1.3	C27A2.4	C37H5.6
C26B9.3	C12C8.2	C12D5.10	C38H2.3	C27B7.9		F01F1.14	F37C12.17	F28D1.4	C27A2.5	C38C3.5
C26B9.5	C12D12.2	C12D5.11	C39B10.6	C27C7.3		F02E11.2	F37C4.7	F28D1.5	C27A2.7	C38D4.1
C26B9.7	C12D12.3	C12D5.4	C39B5.3	C27D6.12		F07C3.9	F37F2.2	F28F5.4	C27C7.3	C38D9.8
C26C6.3	C12D5.10	C12D8.11	C39B5.9	C27H5.2		F07E5.2	F37H8.5	F28G4.1	C27H5.5	C39B5.1
C26C6.9	C12D5.4	C12D8.18	C39E6.6	C27H5.4		F07F6.6	F38A1.13	F28H1.2	C27H5.6	C39E6.2
C26F1.6	C12D5.9	C12D8.19	C40C9.3	C27H5.5		F07G6.8	F38A1.15	F28H6.8	C27H6.1	C39E9.6
C26G2.2	C12D8.18	C12D8.8	C40H1.2	C27H5.7		F08D12.11	F38C2.5	F29A7.4	C29E6.1	C40H5.2
C27A2.4	C12D8.19	C13A2.12	C41D7.2	C28C12.1		F08D12.12	F38C2.7	F29A7.8	C29E6.2	C41G7.2
C27A7.2	C12D8.8	C13C12.2	C42D4.3	C28C12.8		F08D12.3	F38C2.8	F29C4.2	C29F3.6	C41H7.4
C27D8.1	C13B9.4	C13D9.7	C42D8.9	C28D4.1		F08D12.6	F38E11.2	F29D10.1	C29F3.7	C41H7.5
C27D8.2	C13C12.2	C13D9.9	C43D7.4	C28D4.7		F08F3.10	F38E9.6	F30A10.11	C29F7.3	C41H7.6
C27D8.3	C13D9.7	C13G3.1	C44B12.3	C28G1.1		F08G12.11	F39E9.3	F30A10.13	C29F9.6	C42D4.3
C28C12.4	C14A11.5	C14A4.13	C44B12.9	C29E4.12		F08G12.8	F39E9.6	F31E8.1	C29H12.3	C42D8.2
C28D4.1	C14A4.15	C14A4.8	C44B9.6	C29F5.7		F09C3.4	F40B5.1	F31E9.1	C30A5.10	C42D8.5
C28G1.1	C14A6.2	C14A6.3	C44H4.8	C29F9.3		F09C6.12	F40F8.3	F32A5.5	C30A5.7	C43E11.6
C28G1.5	C14A6.3	C14B9.3	C44H9.7	C29F9.4		F09C6.14	F40G9.14	F32D1.2	C30F2.3	C44B9.6
C28H8.11	C14B9.1	C14C10.1	C45B2.2	C29F9.6		F09C6.3	F41C6.4	F32D8.9	C30F8.2	C44C10.10
C28H8.5	C14C10.1	C14C11.1	C45B2.3	C30B5.5		F09E10.6	F41E7.4	F32G8.5	C30G12.1	C44C8.6
C29E4.1	C14C11.1	C14C11.2	C45B2.8	C30B5.7		F09E10.7	F41E7.6	F32H5.6	C30G12.2	C44F1.2
C29E4.7	C14C11.2	C14C11.8	C45G3.4	C30F12.6		F09F7.6	F41E7.7	F33G12.7	C30G4.6	C44H4.6
C29F3.1	C14C11.8	C14F11.6	C45G7.2	C30G12.2		F10A3.6	F41E7.8	F34D10.3	C30H6.1	C44H9.1
C29F3.2	C14C6.2	C14H10.3	C45G7.3	C30H6.1		F10D2.6	F41G3.1	F34D6.9	C30H6.12	C44H9.8
C29F3.5	C15A11.1	C15A11.1	C45G9.13	C30H6.10		F10D7.3	F41G3.17	F35C5.1	C30H6.3	C45E5.3
C29F3.7	C15A11.3	C15A11.3	C45G9.15	C30H6.2		F10E7.11	F41G4.1	F35H10.5	C30H6.5	C45G7.1
C29F4.1	C15A7.4	C15B12.7	C45G9.4	C31A11.5		F10E9.2	F42A6.2	F36D4.6	C31A11.1	C45G7.3
C29F7.1	C15B12.4	C15B12.8	C45H4.10	C31A11.7		F10G7.6	F42D1.4	F36F12.4	C31C9.1	C45G7.4
C29F9.10	C15B12.5	C15C6.1	C45H4.11	C31C9.3		F11A5.3	F42F12.8	F36F12.5	C31E10.7	C45G9.1
C29F9.3	C15C6.2	C15C6.2	C46A5.2	C31C9.7		F11A5.9	F43D2.3	F36G9.7	C31G12.2	C46A5.3
C29F9.4	C15C7.4	C15C7.4	C46F9.2	C31E10.3		F11C7.2	F43G6.10	F36H9.4	C31H1.1	C46C2.6
C30F12.1	C15C8.2	C15C8.2	C47A4.5	C31G12.1		F11C7.3	F44A6.3	F36H9.8	C31H2.2	C46F4.3
C30F2.4	C15C8.3	C15F1.2	C47E12.9	C31H5.6		F11C7.4	F44E5.1	F37C4.2	C31H2.4	C46H3.2
C30F8.3	C15C8.5	C15H11.10	C47E8.11	C31H5.7		F11E6.11	F44E7.3	F37C4.7	C31H5.1	C47A4.1
C30G12.1	C15C8.7	C15H11.13	C47E8.2	C32D5.4		F11F1.6	F45C12.10	F37F2.2	C32B5.1	C47C12.3
C30G12.2	C15H11.10	C15H11.2	C47E8.6	C32D5.6		F11G11.4	F45C12.13	F37H8.5	C32B5.11	C47D12.7
C30G12.3	C15H11.13	C15H9.2	C47F8.6	C32E8.1		F11G11.8	F45D11.13	F38A1.6	C32B5.3	C47E12.6
C30G12.4	C15H11.2	C15H9.3	C48B4.3	C33A12.12		F12E12.5	F45D3.1	F38A5.6	C32C4.2	C47E8.6
C30G4.2	C15H9.2	C16A11.1	C48D5.3	C33A12.13		F13B12.3	F45E12.6	F38C2.8	C32C4.5	C47F8.2
C30H6.1	C15H9.3	C16A3.7	C48E7.10	C33A12.15		F13B12.5	F45E4.5	F38E11.1	C32E12.2	C47F8.8
C30H6.2	C16A11.1	C16B8.2	C49A9.7	C33A12.19		F13C5.5	F45E6.1	F38E9.6	C32E12.3	C47G2.1
C30H6.5	C16A11.7	C16C10.12	C49C8.2	C33A12.2		F13E9.12	F45F2.12	F40F8.3	C32H11.13	C48D5.1
C30H6.8	C16A11.8	C16C10.13	C49G7.11	C33A12.4		F13E9.15	F45F2.13	F40G12.5	C32H11.5	C48G7.3
C31A11.1	C16B8.2	C16C4.5	C50B8.4	C33C12.10		F13E9.5	F45F2.3	F41C3.7	C33A12.14	C49A1.4
C31A11.5	C16C10.9	C16C8.18	C50D2.1	C33C12.8		F13H10.6	F45F2.4	F41E7.4	C33A12.19	C49D10.10
C31B8.7	C16C4.14	C16C8.2	C50D2.4	C33D12.1		F13H8.12	F45H11.2	F41E7.6	C33A12.6	C49D10.3
C31H2.2	C16C4.4	C16D9.2	C50F2.9	C33D3.3		F14D2.14	F46E10.8	F41E7.7	C33B4.2	C50B6.6
C32B5.8	C16C4.5	C16E9.4	C50F4.6	C33F10.1		F14D2.5	F46F11.4	F41E7.8	C33D3.3	C50C3.2
C32E12.3	C16C8.18	C17A2.5	C50F7.5	C33F10.9		F14D7.7	F46G10.1	F41G3.1	C33D9.2	C50E10.4
C32H11.1	C16C8.2	C17B7.10	C50F7.9	C33G8.11		F14F3.1	F47E1.4	F41G3.16	C33G3.1	C50F2.5
C32H11.12	C16C8.8	C17B7.4	C50H2.7	C33G8.12		F14H12.1	F47G4.6	F41H10.12	C33G3.5	C50F7.1
C32H11.4	C16D6.2	C17B7.5	C51E3.10	C33G8.2		F14H12.6	F47G9.2	F41H10.2	C33G8.10	C50H11.8
C32H11.5	C16D9.1	C17B7.8	C52A11.3	C33G8.3		F14H8.6	F48C1.9	F42A6.2	C34B4.3	C50H2.3
C33A12.6	C16D9.2	C17C3.1	C52B9.10	C33H5.8		F15A4.12	F48G7.9	F42A9.3	C34B4.5	C52B11.2
C33B4.2	C16D9.5	C17C3.12	C52B9.11	C34B2.3		F15A4.13	F49B2.4	F42C5.6	C34D1.1	C52B9.7
C33C12.11	C16E9.4	C17C3.15	C52B9.3	C34B7.1		F15E6.10	F49C12.11	F42F12.1	C34D1.2	C52E2.5
C33C12.3	C17A2.8	C17C3.18	C52E4.1	C34C12.9		F15E6.3	F49C12.13	F42F12.7	C34D1.3	C52E2.8
C33C12.4	C17B7.10	C17C3.4	C53C11.1	C34E10.9		F15E6.4	F49D11.3	F42F12.8	C34D1.4	C53A5.9
C33C12.7	C17B7.2	C17C3.5	C53C7.3	C34F11.2		F15E6.8	F49E12.2	F42F12.9	C34E10.7	C53C11.1
C33D3.1	C17B7.4	C17D12.6	C53D5.3	C34F6.3		F16B4.6	F49F1.14	F42G8.9	C34F6.1	C53D5.3
C33D3.3	C17B7.8	C17E7.3	C54C6.5	C34F6.6		F16B4.7	F49F1.3	F43C11.5	C34F6.2	C54C6.2
C33D9.10	C17C3.12	C17E7.6	C54C6.7	C34H4.1		F17E9.1	F49H12.2	F43D2.3	C34F6.3	C54F6.9
C33D9.3	C17C3.18	C17E7.8	C54C8.9	C34H4.2		F17E9.3	F52B11.6	F43G6.10	C35A11.1	C54G4.2
C33G3.3	C17C3.6	C17G1.1	C54D10.14	C34H4.3		F18C5.4	F52C6.6	F44A6.3	C35A11.4	C54G7.3
C33G3.5	C17D12.5	C17G10.3	C54D10.2	C35A5.11		F18C5.9	F53A9.6	F44B9.9	C35A5.11	C56C10.6
C33G8.3	C17D12.6	C17G10.5	C54D10.8	C35A5.2		F18E2.4	F53A9.7	F44E5.1	C35A5.3	C56G7.2
C33G8.8	C17E7.13	C17H1.14	C54D2.6	C35A5.3		F18E9.6	F53B6.8	F44E7.3	C35A5.4	D1005.6
C33H5.2	C17E7.5	C17H1.3	C54E10.2	C35A5.6		F19G12.3	F53C11.9	F45E6.1	C35A5.9	D1007.13
C34B4.7	C17E7.6	C17H1.4	C54F6.11	C35B1.8		F19H6.3	F53F1.1	F45F2.12	C35D10.12	D1022.9
C34B7.3	C17E7.7	C17H1.5	C54F6.5	C35C5.5		F20A1.2	F53H2.2	F45F2.13	C35D10.15	D1044.2
C34C12.6	C17E7.8	C17H1.6	C54F6.6	C35D10.17		F20B10.3	F54B8.4	F45F2.3	C36A4.1	D1065.1
C34D1.5	C17G10.3	C17H1.9	C54F6.8	C35D10.3		F20B6.7	F54D12.1	F45F2.4	C36A4.2	D2024.7
C34D4.3	C17H1.6	C17H11.1	C54G6.3	C35E7.9		F20C5.5	F55A12.2	F45H11.2	C36B7.1	D2024.8
C34E10.9	C17H1.9	C17H12.12	C54G7.1	C36B1.13		F20D1.10	F55C9.14	F46B3.9	C36B7.7	D2062.5
C34F6.11	C17H11.1	C17H12.3	C54H2.4	C36B1.14		F21A10.4	F55C9.5	F46B6.13	C36E8.2	D2063.1
C34F6.3	C17H12.12	C17H12.5	C55A6.8	C36B7.3		F21C10.10	F55G1.10	F46B6.8	C36H8.2	D2063.2
C34G6.6	C17H12.3	C17H12.6	D1005.6	C36B7.7		F21D9.5	F55G1.11	F46C8.1	C37C3.11	D2096.11
C34H4.1	C17H12.5	C17H12.8	D1007.13	C36C5.5		F21E9.2	F55G1.2	F46F5.15	C37C3.12	DY3.3
C34H4.2	C18A11.7	C18A3.4	D1007.19	C37E2.2		F21H7.2	F55G1.3	F47G4.6	C37H5.11	E01G4.5
C34H4.3	C18A3.4	C18B10.6	D1022.5	C37H5.10		F22B5.3	F56C3.8	F47H4.4	C38C3.6	E01G4.6
C35A11.2	C18B10.6	C18B2.1	D1054.7	C38C10.1		F22B5.4	F56D6.10	F48D6.4	C38C3.9	E01G6.1
C35A11.4	C18B2.1	C18B2.2	D1065.4	C38C6.3		F22B7.4	F56D6.5	F48F7.3	C38C6.2	E01H11.1
C35A5.3	C18B2.2	C18B2.4	D1079.1	C38C6.4		F22E10.3	F56D6.8	F49C12.13	C38C6.3	E02A10.2
C35A5.5	C18C4.1	C18B2.5	D1086.2	C38D4.8		F22E5.7	F56D6.9	F49E11.10	C38C6.5	E02H4.5
C35B1.7	C18C4.2	C18B2.6	D2005.3	C39B10.5		F23A7.1	F56E10.4	F49F1.3	C38D9.5	E03G2.4
C35C5.2	C18D1.2	C18C4.1	D2024.10	C39B10.6		F23A7.4	F56H9.2	F52D2.5	C39B10.5	E03H12.7
C35D10.15	C18D11.7	C18C4.2	D2024.4	C39B5.3		F23A7.8	F57A8.8	F52D2.9	C39B5.11	E04A4.2
C35D10.5	C18D4.2	C18D11.10	D2030.11	C39B5.4		F23B2.13	F57B10.14	F53B1.9	C39D10.8	F01D4.6
C36A4.1	C18D4.6	C18D11.7	D2030.12	C39E9.9		F23D12.3	F57C2.4	F53C11.9	C39E9.4	F01D5.7
C36A4.2	C18E3.1	C18D4.2	D2062.4	C39H7.9		F23D12.5	F58A3.4	F53C3.8	C40A11.6	F01E11.5
C36B7.5	C18E3.4	C18D4.3	D2085.2	C40A11.7		F23D12.6	F58D5.2	F53F1.6	C40D2.3	F01F1.12
C36B7.7	C18E3.7	C18E3.4	D2096.9	C40C9.1		F23D12.7	F58E1.10	F53F4.13	C40H1.3	F01G10.4
C36C9.4	C18E9.5	C18E3.7	DY3.3	C40C9.3		F23F1.2	F58E1.8	F53F4.8	C40H5.7	F02C9.3
C36H8.1	C18E9.7	C18E9.5	E02H9.4	C40H1.5		F23F12.8	F58E10.5	F53G12.11	C41A3.1	F02D10.1
C37C3.10	C18E9.8	C18E9.7	E03A3.4	C40H1.8		F23F12.9	F58F12.2	F53H2.2	C41C4.2	F02D8.3
C37C3.3	C18F10.2	C18E9.8	E03H4.10	C41C4.3		F23H12.9	F59A6.12	F54B11.11	C41C4.3	F07A11.1
C37E2.2	C18F10.5	C18F10.2	E04F6.8	C41G7.6		F25H5.7	F59A7.4	F54B8.1	C41C4.5	F07A11.6
C37E2.5	C18F10.8	C18F10.5	EGAP2.2	C41G7.7		F25H5.8	F59B10.2	F54D12.3	C41G7.5	F07C4.6
C38C6.3	C18G1.6	C18H7.11	F01D4.8	C41H7.7		F25H8.5	F59D8.1	F54D12.9	C41H7.7	F07E5.7
C38C6.4	C18G1.8	C18H7.2	F01D5.7	C42C1.14		F26A1.3	F59E11.13	F54F2.6	C42C1.1	F07E5.9
C38C6.6	C18H2.5	C18H9.1	F01E11.3	C42C1.3		F26A10.1	H04M03.2	F55B11.6	C42C1.3	F07F6.1
C38H2.2	C18H7.2	C18H9.5	F01G10.3	C42C1.7		F26D10.12	H06I04.7	F55C7.2	C42C1.6	F07G6.5
C39B5.3	C18H7.4	C18H9.6	F02C12.2	C42D4.2		F26D11.12	H06O01.4	F55C9.6	C42D4.13	F08C6.4
C39D10.6	C18H9.5	C18H9.8	F02D10.1	C43D7.9		F26D11.13	H09G03.1	F55E10.4	C42D4.2	F08D12.11
C39E9.3	C18H9.8	C23G10.1	F02D10.4	C43F9.4		F26D11.4	H10D18.2	F55E10.6	C42D4.4	F08D12.12
C39H7.4	C23G10.1	C23G10.4	F07A5.4	C43F9.5		F26E4.2	H12D21.4	F55G1.10	C42D8.5	F08D12.4
C39H7.9	C23G10.6	C23H3.7	F07B10.7	C43G2.5		F26E4.6	H12I13.6	F55G1.11	C43C3.3	F08F1.1
C40A11.1	C23H5.7	C23H4.4	F07B7.12	C43H6.6		F26F12.4	H23N18.5	F55G1.2	C43D7.5	F08F3.10
C40A11.8	C23H5.9	C23H4.6	F07C3.9	C43H6.8		F27C1.10	H34I24.1	F56C3.8	C43D7.7	F09A5.3
C40D2.4	C24A3.1	C23H5.7	F07C6.2	C43H6.9		F27E11.3	H38K22.4	F56D6.10	C43F9.10	F09C12.1
C40H1.4	C24A8.1	C24A3.1	F07D3.3	C44B11.4		F28C6.7	JC8.14	F56D6.12	C43F9.5	F09C6.3
C40H1.7	C24B5.3	C24B5.3	F07E5.9	C44B11.6		F28D1.3	JC8.8	F56D6.8	C43F9.8	F09C8.2
C41A3.1	C24D10.2	C24B5.5	F07G11.9	C44B12.3		F28D1.5	K02E7.12	F56D6.9	C43H6.9	F09E10.7
C41G6.14	C24D10.7	C24F3.3	F08B12.4	C44B12.9		F28D1.7	K03A1.6	F56E10.4	C44B7.3	F09E8.1
C41G7.5	C24F3.3	C24F3.5	F08B6.1	C44B7.4		F28F5.4	K03H1.3	F56H9.2	C44B7.8	F09G8.10
C41G7.6	C24F3.5	C24G6.7	F08C6.5	C44B7.8		F28F8.2	K03H1.4	F57A8.8	C44C1.1	F10A3.2
C41H7.7	C24G6.7	C24H11.4	F08D12.11	C44B7.9		F28F8.3	K04A8.8	F57B10.14	C44C1.5	F10B5.1
C42D4.13	C24G7.1	C25A8.5	F08F1.6	C44C1.6		F28F8.8	K04F1.9	F57C2.4	C44C10.3	F10D2.10
C42D4.2	C24G7.2	C25B8.5	F08F8.1	C44C10.11		F28F9.2	K04G2.10	F58B3.3	C44E12.3	F10E9.1
C42D4.3	C24H11.4	C25D7.4	F08G12.11	C44C10.3		F28F9.3	K05C4.3	F58D5.2	C44F1.1	F10F2.3
C42D8.5	C25A8.5	C25E10.4	F08G2.5	C44H9.6		F28F9.4	K06A4.7	F58D7.1	C44F1.5	F10G2.2
C43D7.5	C25D7.4	C25F6.7	F08G2.6	C45B11.3		F29A7.2	K06A9.3	F58E1.4	C44H4.1	F10G8.4
C43F9.10	C25E10.2	C25F9.13	F08H9.3	C45B11.6		F29C4.2	K06B4.15	F58E10.5	C44H4.3	F11A6.1
C43F9.11	C25E10.3	C25F9.2	F08H9.9	C45B2.1		F29F11.5	K06C4.10	F58E2.5	C45B2.7	F11C1.6
C43F9.8	C25E10.4	C25F9.5	F09B9.1	C45E5.1		F29G9.1	K07A1.13	F59A1.13	C45E1.4	F11D11.5
C43G2.5	C25E10.5	C25G4.10	F09C12.6	C45E5.2		F30A10.11	K07C11.3	F59D6.1	C45E5.1	F11D5.1
C43H6.6	C25F6.7	C25G4.8	F09C6.11	C45E5.4		F30A10.13	K07C11.7	F59D6.2	C45E5.4	F11E6.10
C43H6.9	C25G4.6	C25G6.3	F09C6.12	C45G9.12		F30H5.2	K07E8.9	F59D8.1	C45G7.1	F11E6.8
C44B11.1	C25G4.8	C25G6.5	F09C6.13	C45G9.15		F30H5.3	K07F5.16	H01M10.2	C45G9.10	F11F1.2
C44B7.11	C25G6.3	C26B2.3	F09C6.14	C45G9.7		F31A9.2	K08B4.7	H02I12.2	C45G9.11	F12D9.2
C44B7.5	C25G6.5	C26B2.8	F09C6.2	C46A5.2		F31E3.6	K08D10.12	H06O01.4	C45G9.14	F12F6.2
C44B7.7	C25H3.15	C26B9.2	F09C6.3	C46A5.8		F31E8.3	K08D12.7	H10D12.2	C45H4.2	F13A2.9
C44B7.8	C25H3.16	C26B9.3	F09E5.14	C46C2.6		F32A5.5	K08D8.1	H10D18.6	C46C11.4	F13A7.2
C44B7.9	C26B2.3	C26B9.7	F09E8.1	C46E1.3		F32B6.6	K08E3.10	H12I13.5	C46C2.2	F13A7.9
C44C1.5	C26B2.4	C26C6.3	F09E8.5	C46F9.1		F32D1.2	K08E7.4	H12I13.6	C46C2.3	F13B9.6
C44C10.1	C26B2.8	C26C6.4	F09F7.6	C46G7.1		F32H2.9	K08H2.4	H14A12.6	C46C2.6	F13D12.7
C44C10.11	C26C6.4	C26C6.7	F09F7.8	C46H11.6		F32H5.6	K09C6.3	H32K16.2	C46F11.6	F13D2.3
C44C10.3	C26C6.7	C26D10.5	F10B5.3	C47A10.6		F33A8.9	K09D9.11	H34I24.1	C46F2.1	F13E6.2
C44F1.1	C26D10.5	C26F1.5	F10C1.3	C47D2.1		F33D11.8	K09F5.3	H38K22.4	C46G7.4	F13E9.11
C44H4.2	C26F1.6	C26F1.6	F10C1.8	C47E12.9		F33D4.3	K09H11.9	H39E20.1	C46H11.7	F13E9.13
C44H4.3	C26G2.1	C26G2.1	F10D11.4	C47E8.11		F33H1.6	K10B3.1	H39E23.2	C46H11.8	F15A4.8
C44H4.5	C27A2.7	C27A12.8	F10D2.8	C48B4.1		F34D6.9	K10C2.7	H39E23.3	C47A10.1	F15A4.9
C44H9.5	C27A7.2	C27A2.4	F10D7.3	C48B4.13		F35A5.2	K11G12.3	JC8.14	C47A4.2	F15A8.5
C44H9.6	C27A7.4	C27A7.2	F10D7.4	C48B4.2		F35C11.2	K11G9.6	JC8.8	C47C12.6	F15D3.1
C45B11.3	C27A7.7	C27A7.6	F10E9.10	C48B4.3		F35C5.1	K11H3.6	K01B6.4	C47E12.11	F15D3.5
C45B2.7	C27B7.6	C27A7.7	F10E9.12	C48C5.1		F35E12.2	K12C11.6	K01D12.1	C47E12.6	F15E6.1
C45E1.4	C27C12.6	C27B7.6	F10F2.3	C48E7.10		F35H10.5	K12H4.6	K02E11.7	C48A7.1	F15H9.4
C45E5.1	C27D6.11	C27C7.3	F10G2.3	C49A9.4		F36A2.10	M01D1.8	K02E11.9	C48B4.12	F16B3.2
C45G7.5	C27D8.1	C27D6.11	F11A5.12	C49A9.8		F36A2.14	M01D7.5	K03A1.6	C48B6.4	F16B4.3
C45G9.10	C27D8.2	C27D8.1	F11C1.4	C49C3.11		F36A2.6	M01D7.9	K03A11.2	C49A1.3	F16B4.8
C45G9.6	C27D9.1	C27D9.1	F11C7.6	C49C3.9		F36A4.4	M02B7.7	K03B8.11	C49A9.5	F16B4.9
C45H4.1	C27F2.2	C27D9.2	F11C7.7	C49C8.2		F36D1.4	M02E1.3	K03B8.5	C49A9.9	F16G10.15
C45H4.17	C27H5.7	C27F2.2	F11D11.8	C49C8.5		F36D3.9	M02H5.8	K03B8.7	C49C3.11	F16H6.1
C45H4.2	C27H5.8	C27H2.2	F11E6.10	C49F5.3		F36G3.3	M04D5.3	K03D3.2	C49C3.12	F16H6.2
C46A5.8	C27H6.1	C27H5.5	F11E6.11	C49F5.4		F36G9.7	M117.6	K03D3.5	C49C3.2	F16H6.7
C46C2.6	C28C12.4	C27H5.6	F11E6.6	C49F5.7		F36H5.11	M151.8	K03H1.3	C49C3.4	F17A2.3
C46E1.2	C28D4.1	C28C12.4	F11G11.8	C49G7.10		F36H5.3	M163.3	K03H1.4	C49F5.1	F17C11.1
C46E1.3	C28D4.5	C28D4.5	F12A10.7	C49G7.12		F36H5.4	M199.9	K03H6.7	C49F5.5	F17E9.1
C46F2.1	C28F5.2	C28H8.5	F12A10.9	C49G7.5		F36H5.8	R01B10.1	K04A8.10	C49F5.8	F17E9.12
C46F4.3	C28H8.5	C29E4.1	F12B6.3	C49G7.6		F36H9.8	R01B10.2	K04A8.5	C49G7.12	F18A11.1
C46G7.2	C28H8.8	C29E4.8	F12E12.11	C49G7.8		F37B1.3	R02C2.1	K04F1.3	C49G7.5	F18A12.1
C46G7.4	C29A12.6	C29E6.4	F12E12.6	C49H3.3		F37C12.11	R03A10.1	K05F6.10	C49H3.1	F18C12.4
C47A10.5	C29E4.10	C29F3.1	F13A2.5	C50C3.9		F37C4.7	R03G8.4	K06A9.3	C50A2.3	F18E2.4
C47A4.1	C29E4.7	C29F3.2	F13A7.13	C50E10.1		F38B2.6	R06A4.6	K06B4.15	C50B6.12	F18E3.5
C47A4.2	C29E4.9	C29F3.7	F13B9.2	C50F2.1		F38E11.1	R07C3.13	K06B4.8	C50B8.5	F18E9.5
C47B2.6	C29E6.4	C29F4.1	F13D12.3	C50F2.9		F38E11.2	R07C3.15	K06C4.10	C50C10.1	F18F11.4
C47B2.8	C29F3.1	C29F4.3	F13E9.15	C50F4.3		F38E9.6	R08C7.1	K07A9.4	C50C3.5	F18H3.3
C47D2.2	C29F3.2	C29F7.6	F13G3.10	C50F4.4		F39C12.4	R08H2.10	K07C11.3	C50C3.9	F19B10.7
C47E12.6	C29F4.3	C29F9.4	F13H10.1	C50F4.9		F39H12.4	R09B3.2	K07C11.7	C50E10.6	F19B6.4
C47E12.9	C29F5.2	C30A5.10	F13H10.6	C50F7.5		F40C5.3	R09B3.3	K07E8.9	C50F2.6	F19D8.1
C48B4.1	C29F7.6	C30B5.3	F14D12.5	C51E3.10		F40E10.1	R09B3.5	K07F5.1	C50F7.1	F19F10.5
C48B4.12	C29G2.3	C30B5.6	F14D2.17	C51E3.2		F40E10.5	R09B5.2	K07F5.16	C50F7.2	F19G12.3
C48E7.8	C29G2.5	C30B5.7	F14D2.5	C52A11.2		F40E3.5	R09B5.3	K07F5.2	C50H11.8	F19G12.4
C49A9.1	C30A5.10	C30C11.2	F14D7.3	C52B9.6		F40G12.5	R09B5.8	K07F5.4	C50H2.2	F19G12.7
C49A9.4	C30A5.4	C30C11.4	F14E5.6	C52E4.7		F40G9.2	R09B5.9	K07H8.7	C50H2.3	F20B10.3
C49A9.5	C30A5.5	C30E1.7	F14F8.6	C52G5.3		F40G9.6	R09F10.9	K08B4.6	C51E3.4	F20C5.7
C49A9.9	C30B5.7	C30E1.8	F14F9.8	C53B4.8		F40H3.6	R09H10.6	K08D12.7	C51E3.5	F21A10.1
C49C3.11	C30D11.1	C30F12.1	F14H12.7	C53C7.3		F40H6.6	R10D12.9	K08E7.4	C52B9.1	F21A10.4
C49C3.4	C30E1.5	C30F12.6	F14H12.8	C53D5.2		F40H7.12	R11.4	K08F9.1	C52B9.5	F21A3.7
C49C3.9	C30E1.7	C30F8.3	F14H3.12	C53D6.6		F41C3.7	R11H6.4	K09C4.6	C52D10.1	F21A3.8
C49C8.1	C30F12.1	C30G12.1	F15A4.8	C54A12.2		F41D9.5	R12B2.6	K09D9.11	C52D10.3	F21A9.1
C49C8.5	C30F12.6	C30G12.3	F15B9.1	C54C6.1		F41E6.15	R12B2.7	K09D9.8	C52E4.5	F21C3.6
C49F5.1	C30F2.2	C30G4.2	F15B9.2	C54C8.11		F41E7.4	R13D11.10	K09F5.3	C53A3.1	F21C3.7
C49F5.8	C30F2.3	C30H6.1	F15D3.2	C54C8.7		F41E7.7	R160.5	K09H9.8	C53A3.2	F21D5.9
C49F8.3	C30G12.1	C30H6.2	F15D3.3	C54D1.2		F41G3.16	T01C3.11	K10B3.1	C53A5.5	F21F12.1
C49G7.12	C30G12.2	C30H6.5	F15D3.8	C54D10.1		F41G3.21	T04B8.3	K10C2.7	C53B4.1	F21F3.2
C50A2.3	C30G12.3	C31A11.1	F15E6.10	C54D10.5		F41G4.1	T04C12.8	K11D12.6	C53B4.2	F21F8.5
C50B6.4	C30G4.2	C31A11.5	F15E6.3	C54D10.8		F41G4.7	T04D3.8	K11G12.3	C53C9.3	F21H7.10
C50B6.8	C30G4.3	C31A11.7	F15E6.4	C54D2.2		F42A10.7	T04G9.7	K11G9.6	C53D6.3	F22B3.1
C50B8.5	C30G7.3	C31H2.2	F15E6.8	C54E10.6		F42A6.2	T05C1.2	K12B6.5	C54C8.4	F22B3.8
C50C3.5	C30H6.1	C32B5.4	F16B3.2	C54F6.11		F42A9.3	T05G5.4	K12C11.6	C54C8.7	F22B8.5
C50D2.1	C30H6.2	C32B5.8	F16B4.4	C54F6.6		F42D1.4	T06H11.5	K12C11.7	C54D1.5	F22D3.2
C50E10.10	C30H6.3	C32D5.14	F16B4.5	C54G4.5		F42F12.7	T07C4.5	K12H6.4	C54D10.9	F22D6.10
C50F4.10	C30H6.5	C32E12.2	F16B4.7	C54G4.6		F42G9.4	T08A9.6	K12H6.8	C54D2.2	F22E5.12
C50F4.3	C31A11.1	C32E12.3	F16C3.2	C54H2.1		F43B10.1	T08A9.7	K12H6.9	C54D2.5	F22E5.21
C50F7.5	C31B8.16	C32E8.6	F16H6.9	C55A6.12		F43C1.1	T08A9.9	M01D7.5	C54E10.3	F22E5.4
C50H11.15	C31C9.1	C32E8.8	F17E9.11	C55B7.2		F43C1.7	T08D10.4	M02B7.7	C54E4.4	F22F1.2
C50H2.1	C31H1.2	C32F10.1	F17E9.12	C55B7.4		F43C11.1	T08G5.10	M02E1.3	C54F6.12	F22F1.3
C50H2.4	C31H1.5	C32H11.1	F18A12.3	C55B7.9		F43C11.7	T09A12.5	M03D4.3	C54G7.2	F22F4.3
C52B9.2	C31H2.3	C32H11.5	F18E2.4	C56A3.7		F43G9.6	T09E8.4	M04D8.1	C55A6.12	F22G12.4
C52B9.6	C31H5.1	C33A12.13	F18E2.6	C56E6.5		F44B9.9	T10B11.1	M117.6	C55A6.4	F22H10.4
C52D10.1	C32B5.13	C33A12.6	F18E9.6	C56E6.6		F44E5.1	T10C6.11	M176.10	C55B6.2	F22H10.5
C52D10.3	C32B5.4	C33B4.2	F18G5.6	D1005.4		F44E7.3	T10C6.12	M199.9	C55B7.12	F23B2.10
C52E4.5	C32B5.8	C33C12.3	F19B10.8	D1007.1		F44F1.6	T10C6.13	R01B10.1	C55B7.3	F23C8.1
C53A3.2	C32C4.1	C33D3.3	F19D8.1	D1007.18		F44F4.10	T10C6.14	R01B10.2	C55B7.4	F23F12.9
C53B4.3	C32D5.14	C33D9.3	F19D8.2	D1007.4		F45C12.2	T10C6.4	R01B10.3	C55C2.3	F23H12.6
C53B4.7	C32D5.4	C33F10.1	F19H6.5	D1014.5		F45D11.10	T10D4.13	R03A10.2	C55C2.4	F25D1.4
C53D5.5	C32E12.1	C33F10.11	F20D1.10	D1022.8		F45E12.6	T10G3.6	R03H10.4	C55C2.5	F25D7.4
C53D6.11	C32E12.2	C33F10.7	F20D12.6	D1025.4		F45E4.5	T11F9.5	R04A9.6	C55F2.1	F25D7.5
C53D6.6	C32E12.3	C33G3.3	F21A9.1	D1025.6		F45E4.7	T12D8.10	R05D7.1	C55H1.2	F25G6.7
C54A12.2	C32E8.4	C33H5.1	F21C10.11	D1025.7		F45F2.12	T13C5.2	R05D8.11	C56A3.3	F25H5.7
C54C6.6	C32E8.6	C33H5.16	F21D5.9	D1025.8		F45G2.2	T14F9.5	R05H10.7	C56C10.4	F25H8.5
C54C8.4	C32H11.1	C33H5.2	F21D9.8	D1025.9		F46B3.7	T14G10.4	R07C12.3	C56E6.2	F26B1.2
C54D1.2	C33A12.13	C33H5.4	F21E9.3	D1054.8		F46B6.13	T15B7.12	R07C3.13	C56E6.4	F26D11.10
C54D10.1	C33A12.14	C34B2.11	F21F8.2	D1065.3		F46C5.1	T19B4.4	R08B4.4	C56G2.4	F26D12.1
C54E4.3	C33A12.6	C34B7.3	F21H7.12	D1081.11		F46C5.3	T19E7.6	R09B3.2	C56G2.6	F26D2.1
C54F6.12	C33B4.2	C34C12.6	F21H7.9	D1086.2		F46C5.4	T20B3.14	R09B5.10	C56G3.1	F26D2.10
C54F6.13	C33D3.3	C34C6.3	F22B3.1	D1086.5		F46C8.1	T20C4.1	R09D1.11	C56G3.2	F26F12.3
C54F6.14	C33F10.1	C34D4.2	F22B3.2	D2007.3		F46E10.2	T20G5.12	R09E10.8	C56G7.2	F26F2.1
C54G7.2	C33F10.11	C34D4.9	F22B7.4	D2024.10		F46E10.8	T21E8.5	R09H10.1	CD4.5	F26G1.6
C55A6.11	C33F10.5	C34E10.9	F22B7.7	D2030.11		F46F5.15	T21H3.5	R09H10.3	CE7X_3.1	F26G5.10
C55A6.12	C33G3.3	C34E7.4	F22B8.1	D2030.12		F46G11.1	T22E5.1	R09H10.6	CE7X_3.2	F26G5.12
C55A6.4	C33G3.5	C34F11.1	F22D6.8	D2062.6		F46H5.5	T22F3.12	R09H10.7	D1005.2	F26G5.9
C55A6.7	C33G8.12	C34F6.1	F22E5.4	D2092.1		F47B7.7	T22G5.7	R102.9	D1009.3	F26H11.2
C55B6.2	C33G8.5	C34G6.1	F22E5.7	D2092.3		F47B8.2	T23B3.2	R10D12.7	D1014.5	F27B3.2
C55B7.12	C33H5.16	C34G6.6	F22F7.4	D2092.6		F47B8.7	T23D8.5	R11.4	D1022.3	F27C8.3
C55B7.3	C33H5.2	C34H4.1	F22G12.7	D2096.1		F47C12.1	T23D8.6	R11G11.14	D1025.2	F27D9.1
C55B7.4	C33H5.4	C34H4.2	F23A7.1	D2096.10		F47C12.2	T23E7.6	R12B2.6	D1025.3	F27E11.2
C55C3.6	C34B2.3	C34H4.3	F23B2.13	D2096.13		F47E1.1	T23F2.3	R12B2.7	D1044.1	F27E11.3
C56C10.4	C34B4.2	C35A11.4	F23B2.3	D2096.9		F47E1.3	T23F2.5	R13D11.10	D1044.3	F28B1.1
C56E10.4	C34B7.3	C35A5.1	F23D12.7	DH11.2		F47G4.6	T24B8.5	R160.5	D1044.8	F28B3.4
C56E6.2	C34C6.3	C35A5.2	F23F1.10	DH11.3		F48C1.8	T24D3.2	R186.2	D1054.9	F28B4.1
C56E6.5	C34D4.1	C35A5.3	F23F1.2	E02C12.4		F48C1.9	T24D8.3	R31.3	D1065.3	F28D1.3
D1007.1	C34D4.2	C35A5.5	F25A2.1	E02C12.8		F48C11.2	T24D8.4	R52.7	D1069.1	F28D1.5
D1007.2	C34D4.3	C35B1.8	F25B3.2	E02D9.1		F48D6.3	T24F1.7	R90.4	D1073.1	F28D9.1
D1007.3	C34E10.9	C35C5.11	F25B4.8	E02H1.8		F48G7.2	T24H10.6	T01B4.3	D1086.3	F28F8.2
D1009.1	C34E11.2	C35C5.2	F25H2.3	E02H9.1		F48G7.9	T25C12.2	T01C3.11	D2021.4	F28F9.3
D1014.5	C34F11.1	C35C5.5	F25H5.8	E02H9.4		F49B2.7	T25C12.4	T01E8.9	D2023.3	F28H7.4
D1022.3	C34F11.4	C35D10.2	F26A1.10	E02H9.7		F49E10.2	T25E12.11	T02B11.8	D2023.7	F28H7.9
D1025.2	C34F11.5	C36A4.2	F26A3.6	E02H9.9		F49E11.3	T26C11.3	T02B5.3	D2024.2	F29B9.9
D1025.3	C34F6.1	C36A4.3	F26C11.4	E03A3.3		F49E12.10	T26C11.8	T02D1.7	D2024.3	F29C4.5
D1037.2	C35A11.4	C36A4.5	F26D10.11	E03H4.11		F49H12.7	T26E3.5	T02H6.6	D2062.5	F29C4.7
D1037.3	C35A5.1	C36B7.5	F26D10.12	E04D5.2		F52C6.12	T26E4.4	T03E6.3	D2063.2	F29C4.8
D1044.3	C35A5.5	C36B7.7	F26D11.12	E04D5.5		F52D2.5	T26H2.6	T03E6.5	D2092.7	F29D10.2
D1053.1	C35B1.8	C36C9.4	F26D11.13	E04F6.6		F52F12.2	T26H5.9	T03E6.8	D2092.8	F29G9.1
D1054.5	C35C5.11	C36H8.1	F26D11.4	E04F6.9		F52H3.6	T27A1.1	T03F1.11	D2096.13	F31A9.3
D1054.8	C35C5.2	C37A2.3	F26D2.1	EEED8.12		F52H3.7	T28A11.15	T04A11.12	D2096.5	F31B12.3
D1086.3	C35C5.5	C37C3.10	F26D2.14	EEED8.13		F53A2.6	T28A11.6	T04C12.8	DC2.5	F31B9.1
D1086.4	C35D10.14	C37E2.2	F26D2.15	EEED8.4		F53A3.3	T28A11.7	T04G9.7	DH11.1	F31E8.3
D2013.3	C35D10.15	C37H5.11	F26D2.3	EEED8.6		F53A9.3	T28C6.10	T05C1.2	E01A2.7	F31E9.1
D2023.7	C35D10.2	C38C10.4	F26E4.2	EGAP1.1		F53A9.6	W01B6.7	T05C1.5	E01G4.3	F32A6.2
D2024.10	C35E7.2	C38C6.3	F26E4.6	EGAP9.2		F53A9.7	W01D2.1	T05C3.8	E01G4.6	F32A6.4
D2024.3	C36A4.2	C38C6.6	F26F12.5	EGAP9.4		F53A9.8	W01G7.3	T05E12.3	E02H4.1	F32A7.5
D2024.4	C36A4.3	C38D9.8	F26F2.1	F01D4.7		F53B6.8	W02D7.9	T05E7.1	E02H4.2	F32A7.8
D2092.1	C36A4.5	C38H2.2	F26G1.2	F01D5.1		F53C11.6	W02D9.5	T05G5.4	E03G2.4	F32B4.4
D2092.8	C36B7.7	C39B10.2	F26G1.5	F01D5.2		F53C11.9	W02D9.6	T07C4.4	E03H12.3	F32B5.1
D2096.2	C36C9.4	C39B10.5	F27D9.7	F01D5.3		F53C3.6	W02D9.7	T07C4.5	E03H12.6	F32D1.10
D2096.3	C36C9.5	C39B5.1	F27E5.5	F01D5.5		F53F4.15	W03A5.3	T07H3.3	E03H4.11	F32D1.3
E01A2.7	C36E6.8	C39B5.12	F28A10.1	F01E11.4		F53F4.17	W03C9.5	T08A9.10	E03H4.6	F32D1.8
E02C12.4	C36H8.1	C39B5.3	F28B1.3	F01F1.14		F53F8.6	W03F11.1	T08A9.7	E04D5.3	F32H2.6
E02C12.6	C36H8.2	C39B5.7	F28B4.1	F01G10.2		F53G12.4	W03H9.2	T08A9.8	E04F6.2	F33A8.3
E02C12.8	C37A2.3	C39B5.8	F28C12.6	F01G10.3		F53G12.9	W04A8.2	T08A9.9	EEED8.11	F33D11.3
E02H4.5	C37C3.10	C39D10.6	F28D1.11	F02E11.4		F53G2.1	W04E12.4	T08G5.1	EEED8.6	F33E2.10
E02H9.3	C37C3.12	C39E9.3	F28D1.3	F02E8.2		F53G2.2	W05B2.6	T08G5.10	EGAP2.3	F33H1.5
E02H9.8	C37H5.11	C39F7.4	F28D1.4	F02E9.1		F53G2.3	W06D11.2	T08G5.12	EGAP9.3	F33H12.2
E03E2.1	C38C10.4	C39H7.1	F28D1.5	F07A5.2		F54A3.4	W08A12.2	T09A12.5	F01D5.1	F34D10.6
E03G2.1	C38C3.7	C39H7.9	F28F5.4	F07A5.3		F54D8.1	W08E3.4	T09F5.9	F01D5.10	F34D6.3
E03G2.4	C38C6.3	C40A11.8	F28F9.2	F07B10.1		F54F12.1	W08F4.11	T10B10.9	F01D5.2	F34D6.4
E03H12.5	C38C6.4	C40C9.1	F28G4.1	F07C3.9		F54G2.2	W09G10.1	T10B11.1	F01D5.3	F35A5.3
E04D5.3	C38D9.1	C40H1.4	F28H1.5	F07C4.12		F55A3.5	W09G12.10	T10B11.4	F01D5.6	F35B3.5
E04D5.5	C38D9.6	C40H1.8	F28H6.7	F07C6.2		F55A3.6	W09G12.4	T10B5.7	F01E11.1	F35C5.1
E04F6.15	C38D9.7	C40H5.4	F28H6.8	F07C6.6		F55A4.3	W10G11.2	T10C6.12	F01F1.6	F35C5.3
E04F6.3	C39B10.1	C40H5.5	F28H7.11	F07F6.6		F55B11.6	W10G6.1	T10C6.13	F02A9.7	F35D2.2
E04F6.6	C39B10.2	C41A3.1	F29B9.11	F07G6.2		F55C10.5	Y102E9.3	T10C6.14	F02C12.4	F35E2.6
E04F6.7	C39B10.5	C41G6.14	F29D10.1	F07G6.8		F55C9.14	Y105C5A.13	T10D4.13	F02G3.1	F35G2.5
EGAP2.3	C39B5.11	C41G6.2	F30A10.11	F07H5.6		F55C9.4	Y105C5A.9	T11F9.19	F02H6.6	F35H12.1
EGAP7.1	C39B5.12	C41G7.2	F30A10.2	F07H5.9		F55C9.8	Y105E8B.11	T12A7.3	F07B10.2	F36A4.6
F01D4.1	C39B5.3	C41G7.5	F30H5.2	F08A8.6		F55G1.1	Y105E8B.6	T13F3.2	F07C3.2	F36D3.3
F01D4.2	C39D10.5	C41G7.6	F31A3.3	F08B12.2		F56A12.1	Y110A2AL.1	T14D7.3	F07C3.7	F36D3.4
F01D4.6	C39D10.6	C42C1.2	F31E3.2	F08B4.4		F56B3.6	Y110A2AL.6	T14E8.2	F07C6.6	F36F2.7
F01D5.1	C39E6.6	C42C1.3	F31E3.6	F08B6.1		F56D2.3	Y110A2AM.4	T15B7.12	F07F6.2	F36H5.3
F01D5.10	C39E9.10	C42D4.13	F31F4.12	F08D12.2		F56D5.1	Y111B2A.2	T18H9.4	F07G6.6	F36H5.9
F01D5.2	C39E9.2	C42D4.2	F32A7.8	F08F3.7		F56D6.10	Y116A8C.17	T19C3.7	F07H5.9	F36H9.3
F01D5.3	C39H7.1	C42D4.3	F32D1.2	F08F8.6		F56D6.8	Y116A8C.29	T19C3.9	F08A8.1	F36H9.8
F01D5.5	C39H7.9	C42D8.5	F32G8.3	F08G12.8		F56D6.9	Y116A8C.42	T20B3.14	F08A8.2	F37A8.1
F01D5.6	C40A11.1	C43C3.2	F32G8.5	F08G5.3		F56E10.4	Y116A8C.44	T20D3.1	F08A8.3	F37B1.1
F01E11.5	C40A11.8	C43D7.5	F32H5.6	F08H9.12		F56F11.5	Y116F11A.1	T20D4.15	F08A8.4	F37B1.4
F01F1.13	C40C9.1	C43D7.8	F32H5.7	F09B12.5		F56H11.3	Y119D3B.15	T20D4.19	F08C6.1	F37C12.12
F01G10.10	C40C9.2	C43F9.11	F33A8.9	F09B9.5		F56H6.2	Y119D3B.21	T20F10.4	F08C6.2	F37C4.5
F01G10.2	C40D2.3	C43F9.5	F33D11.3	F09C12.2		F56H9.2	Y11D7A.10	T20H9.2	F08D12.2	F38A3.2
F01G10.3	C40H1.3	C43F9.6	F33D11.6	F09C6.10		F57B10.14	Y17G7B.1	T21E8.5	F08D12.4	F38A5.2
F01G10.4	C40H1.7	C43G2.5	F33D11.8	F09C6.11		F57G4.8	Y17G9B.2	T21H3.5	F08E10.7	F38A5.6
F01G10.6	C40H1.8	C43H6.6	F33E2.6	F09C6.12		F57H12.5	Y18D10A.12	T22E5.1	F08F1.1	F38B6.5
F01G12.2	C40H5.4	C44B11.1	F33G12.7	F09C6.13		F58D5.2	Y22D7AR.10	T22F3.5	F08F3.3	F38C2.4
F02A9.1	C40H5.5	C44B11.3	F34D10.8	F09C6.14		F58E1.8	Y23H5B.12	T22G5.7	F08G12.4	F38E1.5
F02C12.4	C40H5.7	C44B7.3	F34D6.7	F09C8.1		F58E6.10	Y25C1A.6	T23B7.1	F08G5.5	F38E11.12
F02C12.5	C41C4.1	C44B7.8	F35B3.4	F09F3.6		F58E6.3	Y32B12B.1	T23D8.5	F08H9.12	F38E11.2
F02D10.5	C41C4.3	C44B7.9	F35C5.4	F09F7.1		F58F6.2	Y32G9A.11	T23D8.6	F08H9.4	F38E11.6
F02E11.1	C41D7.2	C44B9.2	F35C8.3	F09F9.3		F58G4.1	Y32G9A.2	T23E1.2	F08H9.6	F39D8.3
F02E11.4	C41G6.10	C44C10.1	F35D2.4	F09G8.8		F59A6.10	Y37D8A.19	T23F2.5	F08H9.7	F39D8.4
F02E9.3	C41G6.14	C44C10.3	F35E2.2	F10A3.6		F59A7.12	Y37D8A.6	T24D3.2	F09A5.3	F39E9.1
F07A11.1	C41G6.2	C44E12.3	F35E2.3	F10B5.3		F59A7.4	Y37E11AL.2	T24D8.3	F09B12.1	F39E9.12
F07A11.5	C41G7.2	C44F1.1	F35G8.2	F10C1.5		F59B1.4	Y37E11B.7	T24F1.4	F09B12.3	F39E9.2
F07A5.2	C41G7.6	C44H4.1	F35H10.5	F10C1.8		F59B10.2	Y37E3.3	T24F1.5	F09B9.2	F39E9.4
F07B10.1	C41H7.7	C44H4.2	F35H8.1	F10C1.9		F59B10.3	Y37E3.4	T25B9.12	F09C12.1	F39H12.2
F07B7.12	C42C1.2	C44H4.3	F36A2.8	F10C2.3		F59E12.12	Y37H2A.10	T26A8.3	F09C6.10	F39H12.4
F07C3.1	C42C1.3	C44H9.7	F36A4.1	F10D11.3		H01G02.1	Y38E10A.10	T26E3.1	F09C8.1	F40B1.1
F07C6.2	C42D4.2	C45B11.5	F36A4.10	F10D2.11		H02I12.2	Y38E10A.11	T26E3.6	F09D12.1	F40F12.4
F07E5.1	C42D8.4	C45B2.4	F36A4.5	F10D2.6		H02I12.4	Y38E10A.12	T26H5.5	F09D12.2	F40F4.8
F07F6.5	C42D8.5	C45B2.7	F36A4.8	F10E7.9		H04J21.1	Y38E10A.16	T26H5.8	F09E10.3	F40F8.10
F07F6.9	C43C3.2	C45G7.5	F36F12.7	F10E9.11		H04M03.2	Y38E10A.24	T26H5.9	F09E10.6	F40G12.10
F07G11.4	C43D7.8	C45G9.10	F36F2.2	F10E9.12		H06I04.7	Y38E10A.25	T27B7.5	F09E10.7	F40G12.15
F07G6.6	C43E11.6	C45G9.11	F36G9.11	F10E9.7		H06O01.4	Y38F1A.1	T27E4.6	F09E5.16	F40G12.4
F07G6.7	C43F9.5	C45G9.6	F36G9.5	F10F2.4		H12I13.5	Y38F1A.9	T28A11.2	F09E5.4	F40G12.5
F07H5.9	C43F9.6	C45H4.2	F36H1.12	F10F2.9		H12I13.6	Y38H6C.1	T28F2.6	F09E8.6	F40G12.8
F08A8.1	C43G2.5	C46A5.2	F36H12.11	F11A5.12		H14A12.6	Y38H6C.15	W01B6.7	F09F3.9	F40G9.15
F08A8.2	C43H6.6	C46A5.3	F36H12.13	F11A5.15		H14A12.7	Y38H6C.4	W01D2.1	F09F7.1	F40H3.4
F08A8.3	C43H6.9	C46A5.4	F36H12.17	F11C1.3		H23L24.1	Y39A3A.5	W02D7.11	F09F7.4	F40H6.2
F08A8.4	C44B11.1	C46C2.4	F36H12.4	F11C7.1		H23L24.2	Y39A3CL.3	W02D7.12	F09F9.2	F40H6.6
F08B12.2	C44B7.11	C46C2.6	F36H12.7	F11C7.2		H23L24.5	Y39A3CR.4	W02D7.2	F09G8.9	F41C6.6
F08C6.2	C44B7.3	C46E1.2	F36H9.2	F11D11.3		H23N18.6	Y39A3CR.8	W02D7.4	F10A3.4	F41D9.5
F08F1.3	C44B7.6	C46E1.3	F37A4.6	F11E6.1		H24O09.2	Y39B6A.5	W02D7.8	F10C1.2	F41E6.8
F08F1.6	C44B7.8	C46E10.8	F37A8.5	F11E6.3		H27M09.4	Y39C12A.5	W02D9.5	F10D2.1	F41E7.3
F08F3.3	C44B9.2	C46F4.3	F37B1.3	F11E6.4		H32C10.1	Y39G10AL.1	W02D9.6	F10D2.11	F41E7.9
F08G2.8	C44C1.5	C46H11.11	F37B1.4	F11E6.9		H34I24.1	Y39G10AR.15	W02D9.7	F10D2.12	F41G3.2
F08G5.4	C44C10.3	C46H11.7	F37B1.7	F11F1.7		H35N09.1	Y39G10AR.20	W03F8.2	F10D2.2	F41G4.7
F08G5.5	C44C3.7	C46H11.8	F37C12.11	F11G11.10		H38K22.4	Y40B10A.6	W03G1.2	F10D2.4	F42A6.7
F08G5.6	C44F1.2	C46H11.9	F37C12.17	F11G11.13		H39E23.2	Y40H7A.11	W03G1.7	F10D2.6	F42A6.9
F08G5.7	C44H4.1	C46H3.3	F37C4.2	F12A10.5		H39E23.3	Y41D4B.5	W04A8.2	F10F2.9	F42C5.3
F08H9.6	C44H9.1	C47A4.2	F37C4.7	F12A10.9		JC8.14	Y41E3.12	W04G5.6	F10G2.9	F42D1.2
F08H9.7	C44H9.2	C47B2.6	F38A1.15	F12D9.1		JC8.8	Y41E3.22	W05B10.3	F10G7.6	F42F12.8
F08H9.8	C45B11.5	C47B2.8	F38A1.4	F12E12.1		K01A11.3	Y43F4B.10	W06D11.2	F11A1.3	F42G2.7
F08H9.9	C45B2.4	C47E12.5	F38A1.8	F12E12.10		K01A2.10	Y43F8B.10	W06G6.1	F11A5.2	F42G4.7
F09A5.2	C45E5.1	C47E12.6	F38A5.10	F12E12.3		K01A2.2	Y43F8C.18	W06G6.11	F11C1.3	F43B10.1
F09B12.1	C45E5.4	C47F8.6	F38A5.12	F12E12.9		K01A2.3	Y43F8C.2	W06H8.4	F11C1.5	F43C1.1
F09B12.3	C45G9.10	C48B4.1	F38B6.3	F12F6.8		K01A2.4	Y44A6D.1	W08A12.2	F11D11.11	F43C11.2
F09B12.6	C45G9.11	C48C5.1	F38E11.2	F13A2.1		K01A2.7	Y44A6D.2	W08F4.11	F11D11.3	F43D2.3
F09C12.2	C45G9.6	C48D5.1	F38H12.5	F13A7.11		K01D12.5	Y44E3A.3	W09G12.6	F11D11.7	F43D9.4
F09C6.10	C45G9.9	C48D5.3	F39D8.2	F13A7.13		K01H12.1	Y45F10A.5	W10G11.1	F11E6.3	F43G9.6
F09C8.1	C45H4.16	C48E7.8	F39D8.3	F13B6.2		K02A6.2	Y45F10C.4	W10G11.2	F11E6.4	F44C8.3
F09E5.10	C45H4.2	C49A1.3	F39E9.11	F13B9.2		K02B12.4	Y45F10C.6	W10G11.3	F11E6.5	F44E7.7
F09E5.11	C46A5.2	C49A9.1	F39H12.2	F13C5.3		K02B7.4	Y45G5AM.5	W10G6.1	F11G11.1	F44F1.6
F09F3.9	C46A5.3	C49A9.5	F40B5.1	F13C5.5		K03A1.4	Y46E12A.4	Y105C5A.17	F11G11.10	F44G3.2
F09F7.4	C46A5.4	C49A9.8	F40F12.7	F13D12.10		K03B4.4	Y46G5A.20	Y105C5B.16	F11G11.13	F44G4.8
F09F7.5	C46E1.2	C49C3.13	F40F4.8	F13E9.12		K03B4.7	Y46H3C.4	Y105C5B.17	F12A10.6	F45B8.3
F09F9.2	C46E1.3	C49C3.4	F40F8.12	F13E9.15		K03B8.11	Y47D3A.20	Y105E8B.6	F12D9.1	F45B8.4
F09G2.6	C46E10.1	C49C3.9	F40F8.3	F13E9.5		K03H1.12	Y47D9A.4	Y108F1.5	F12F3.1	F45C12.2
F09G8.5	C46E10.5	C49C8.1	F40G12.15	F13G3.10		K03H1.3	Y47H9B.2	Y10G11A.2	F12F6.10	F45D11.1
F09G8.8	C46E10.8	C49C8.5	F40G12.9	F13G3.8		K03H1.4	Y48A5A.3	Y110A2AL.1	F12F6.9	F45D11.10
F10A3.1	C46H11.7	C49F5.4	F40G9.10	F13H10.1		K04A8.2	Y48G1C.9	Y110A2AL.6	F13A2.3	F45F2.12
F10A3.2	C46H11.8	C49F5.8	F40G9.2	F13H10.6		K04A8.8	Y48G8AL.12	Y110A2AM.4	F13B12.4	F45F2.13
F10A3.3	C46H11.9	C49F8.3	F40H3.3	F13H10.9		K04G11.2	Y49E10.15	Y111B2A.2	F13B12.7	F45F2.3
F10B5.3	C46H3.3	C49G7.12	F40H3.4	F13H8.4		K04H4.1	Y49E10.22	Y113G7A.16	F13B6.1	F45H10.1
F10B5.4	C47A10.1	C49G7.3	F40H6.2	F13H8.9		K04H4.2	Y49E10.27	Y11D7A.10	F13C5.5	F45H11.1
F10B5.9	C47A10.5	C49G7.4	F40H6.5	F14B6.4		K05C4.3	Y49F6B.12	Y17G7B.1	F13D12.2	F46A9.6
F10C1.8	C47A4.2	C49G7.5	F40H6.6	F14B8.4		K05F6.3	Y49F6B.7	Y17G9B.2	F13E9.13	F46B6.2
F10C1.9	C47A4.3	C49G7.8	F41B5.3	F14B8.7		K05F6.6	Y49G5A.1	Y18D10A.12	F13E9.6	F46B6.8
F10C2.7	C47C12.6	C49H3.1	F41C3.1	F14D12.6		K06A1.1	Y4C6A.4	Y19D2B.2	F13G3.2	F46C8.2
F10D11.5	C47E12.11	C50B6.4	F41C3.3	F14D2.7		K06A1.3	Y51A2D.10	Y22D7AL.3	F13G3.3	F46F6.1
F10D11.6	C47E12.6	C50B6.5	F41C3.6	F14E5.5		K06A4.2	Y51A2D.11	Y22D7AR.10	F13G3.4	F46F6.4
F10D2.1	C47E12.9	C50B6.7	F41C3.7	F14F4.1		K06A9.2	Y51A2D.9	Y26D4A.12	F13G3.8	F46H5.6
F10D2.10	C47E8.2	C50C3.2	F41D3.7	F14F7.1		K07A1.6	Y51H7BR.8	Y27F2A.8	F13H8.3	F46H5.7
F10D2.11	C47E8.6	C50C3.5	F41D9.5	F14F7.3		K07A1.7	Y51H7C.1	Y32B12B.1	F13H8.4	F47A4.1
F10D2.2	C47F8.6	C50D2.1	F41E6.14	F14F9.3		K07A12.3	Y51H7C.8	Y32G9A.11	F13H8.9	F47B8.12
F10D2.8	C48A7.1	C50D2.3	F41E7.4	F14F9.4		K07A12.6	Y52E8A.1	Y32G9A.2	F14B6.4	F47C10.6
F10D2.9	C48B6.8	C50E10.10	F41E7.7	F14F9.8		K07H8.11	Y53C12A.7	Y34F4.2	F14D12.2	F47C10.7
F10E7.1	C48C5.1	C50E10.11	F41E7.8	F14H12.3		K08A2.2	Y53F4B.14	Y37D8A.19	F14D12.4	F47D12.4
F10E9.5	C48C5.3	C50F2.6	F42A6.5	F14H3.11		K08C7.4	Y53F4B.17	Y37E11AL.9	F14D2.7	F47E1.3
F10F2.3	C48D1.3	C50F4.10	F42A6.8	F14H3.2		K08C7.5	Y53F4B.24	Y37E11B.7	F14D7.1	F47E1.5
F10F2.5	C48D5.1	C50F4.2	F42A9.8	F15A2.5		K08D12.4	Y53F4B.37	Y37E3.3	F14D7.11	F47G4.1
F11A1.2	C48D5.3	C50F7.5	F42A9.9	F15A4.1		K08E7.4	Y54G2A.19	Y38E10A.11	F14D7.5	F47G4.4
F11A5.13	C48E7.8	C50H2.12	F42D1.4	F15A4.10		K08F11.1	Y54G2A.38	Y38E10A.16	F14F11.2	F47G4.5
F11A6.2	C49A1.3	C52A10.1	F42E8.1	F15A4.5		K08F4.12	Y54G2A.44	Y38E10A.24	F14F3.4	F47G6.3
F11C1.3	C49A9.1	C52B9.6	F42F12.10	F15A8.4		K09A11.4	Y54G2A.5	Y38E10A.9	F14F8.8	F47H4.4
F11C7.6	C49C3.13	C52B9.7	F42G2.7	F15E6.4		K09A11.5	Y54G9A.9	Y38F1A.1	F14H12.2	F48A11.5
F11D11.11	C49C3.4	C52E4.4	F43C11.12	F15H10.8		K09C4.4	Y55B1AL.2	Y38F1A.9	F15A2.5	F48B9.1
F11D11.3	C49C8.1	C52E4.7	F43C11.4	F16B12.1		K09C8.2	Y56A3A.29	Y38H6C.18	F15A4.5	F48C1.4
F11D5.7	C49C8.4	C53A5.4	F43C11.7	F16B4.12		K09E4.1	Y57A10A.9	Y38H6C.19	F15A4.9	F48C11.2
F11E6.10	C49D10.8	C53A5.9	F43C9.1	F16B4.4		K09F5.3	Y57G11C.46	Y38H6C.21	F15A8.5	F48G7.5
F11E6.3	C49F5.1	C53B4.6	F43D2.3	F16B4.5		K09F6.8	Y57G11C.5	Y38H6C.22	F15B9.6	F49B2.4
F11E6.5	C49F5.4	C53B4.7	F43E2.11	F16F9.2		K09H11.11	Y57G11C.52	Y38H6C.23	F15B9.7	F49C5.4
F11E6.9	C49F5.8	C53B4.8	F43E2.6	F16G10.10		K09H9.8	Y57G7A.1	Y38H6C.4	F15D3.1	F49D11.2
F11G11.10	C49G7.3	C53C7.1	F43G6.10	F16H6.10		K10C2.7	Y57G7A.2	Y39A3CL.3	F15E11.4	F49E11.10
F11G11.12	C49G7.4	C53C7.3	F43G6.7	F17A9.3		K10C9.1	Y59E1A.1	Y39A3CR.4	F15E6.5	F49E11.3
F11G11.3	C49G7.8	C53D6.11	F44A2.2	F17C11.12		K10D2.4	Y59E9AL.1	Y39B6A.5	F15E6.6	F49F1.11
F11G11.9	C49H3.1	C53D6.3	F44B9.10	F17C11.13		K10D3.4	Y59E9AR.4	Y39G8B.3	F15G9.4	F49F1.8
F12D9.1	C50B6.11	C54A12.1	F44C4.3	F17C11.5		K11G9.6	Y5H2A.3	Y40B10A.6	F15G9.6	F49F1.9
F12E12.4	C50B6.5	C54A12.2	F44E5.1	F17C11.6		K11H12.1	Y5H2B.3	Y40H7A.11	F15H10.8	F49H12.1
F12E12.9	C50B6.6	C54C8.4	F44E7.3	F17E9.2		K11H12.6	Y60A3A.21	Y41C4A.17	F15H9.1	F49H12.3
F12F6.9	C50B6.7	C54D1.2	F44F4.3	F17E9.4		K12D12.3	Y60A3A.23	Y41D4B.5	F15H9.4	F49H6.8
F13A7.10	C50C3.2	C54D10.12	F44F4.4	F18A11.2		K12G11.2	Y62H9A.3	Y41E3.12	F16B12.1	F52A8.3
F13A7.9	C50C3.5	C54D10.13	F44F4.7	F18A11.3		K12G11.3	Y62H9A.5	Y43F4B.10	F16B12.7	F52C12.5
F13B12.4	C50D2.2	C54D10.14	F45C12.1	F18A12.2		K12G11.6	Y63D3A.7	Y43F8A.1	F16B3.1	F52D10.5
F13B6.1	C50D2.3	C54D10.4	F45D3.4	F18E2.5		M01D1.10	Y66A7A.7	Y43F8B.10	F16B4.11	F52E1.4
F13B6.2	C50E3.16	C54D2.1	F45E12.6	F18E3.11		M01H9.3	Y66H1A.3	Y43F8C.17	F16B4.3	F52E4.8
F13B6.3	C50F2.5	C54E10.3	F45E4.5	F18E9.6		M02B7.6	Y67D8C.7	Y43F8C.18	F16F9.2	F52F10.2
F13D12.6	C50F4.10	C54F6.10	F45F2.12	F18E9.7		M02E1.3	Y67D8C.8	Y43F8C.2	F16F9.4	F52G3.3
F13D12.9	C50F4.2	C54F6.12	F45F2.3	F18F11.1		M02G9.1	Y68A4A.13	Y44A6D.1	F17A2.3	F52G3.4
F13E6.5	C50F4.8	C54F6.4	F45F2.6	F19B10.8		M02G9.2	Y69A2AR.28	Y44A6D.2	F17A2.4	F52H3.6
F13E9.10	C50F7.5	C54F6.8	F45G2.6	F19C6.3		M03D4.3	Y69A2AR.3	Y45F10C.4	F17A9.5	F53A2.2
F13G3.1	C50H11.10	C54F6.9	F45H11.5	F19C6.4		M03E7.4	Y69F12A.3	Y45F10C.6	F17C11.5	F53A9.4
F13G3.3	C50H11.15	C54G4.4	F46A9.3	F19C6.5		M04D8.2	Y71D11A.2	Y45F10D.16	F17C8.1	F53A9.5
F13H10.9	C50H11.8	C54G7.3	F46B3.16	F19C7.3		M04D8.3	Y71F9AL.6	Y45F10D.2	F17C8.6	F53B1.3
F13H8.11	C50H2.12	C55A6.5	F46B3.7	F19C7.5		M117.3	Y71F9AL.7	Y46E12BL.1	F17E9.2	F53B2.5
F13H8.3	C50H2.4	C55A6.6	F46B6.10	F19C7.6		M117.4	Y71F9B.4	Y46E12BR.1	F17E9.3	F53B2.6
F13H8.5	C50H2.5	C55B7.12	F46B6.11	F19H6.5		M163.3	Y71G12B.14	Y46G5A.23	F18A1.1	F53B3.2
F14B6.6	C52A10.2	C55C3.1	F46B6.8	F19H6.7		M195.2	Y71H2AM.22	Y46H3C.4	F18A12.4	F53C3.13
F14B8.5	C52A11.3	C55C3.6	F46C5.1	F20A1.2		M199.8	Y71H2B.1	Y47D3A.20	F18A12.5	F53C3.4
F14D7.5	C52D10.3	C55C3.7	F46C8.1	F20D12.3		M199.9	Y71H2B.4	Y47D9A.4	F18C5.5	F53C3.7
F14D7.6	C52E2.5	C56A3.3	F46F11.4	F20D12.6		M28.1	Y73B3B.3	Y47H9C.15	F18E2.1	F53E10.5
F14E5.1	C52E4.1	C56C10.4	F46F5.1	F20D6.3		M28.5	Y73B6BL.32	Y48A5A.3	F18E2.5	F53F10.2
F14H3.11	C52E4.7	C56E10.3	F46F6.4	F20G2.1		M60.4	Y73B6BL.34	Y48A6B.4	F18E3.11	F53G12.3
F14H3.3	C53A3.2	C56E6.5	F47B8.10	F20G2.5		M60.7	Y73C8C.2	Y48G9A.7	F18E9.1	F53G12.6
F15A2.2	C53A5.4	C56E6.6	F47B8.4	F21C10.3		M88.3	Y73F8A.22	Y49F6B.13	F18E9.4	F54A3.1
F15A2.5	C53A5.9	C56G2.4	F47B8.7	F21C10.8		R01B10.2	Y74C9A.2	Y49F6B.6	F18E9.7	F54A5.2
F15B9.1	C53B4.1	CD4.5	F47C10.2	F21D5.4		R01H2.4	Y75B12B.11	Y50E8A.1	F18F11.3	F54A5.3
F15B9.2	C53B4.7	D1005.1	F47C10.3	F21D9.1		R02C2.2	Y75B8A.10	Y50E8A.2	F18G5.2	F54B11.2
F15B9.3	C53B7.1	D1005.3	F47C12.6	F21D9.2		R02C2.6	Y75B8A.11	Y51A2D.10	F19B2.5	F54B11.7
F15B9.6	C53B7.5	D1005.6	F47E1.2	F21E9.3		R02C2.7	Y7A5A.10	Y51A2D.9	F19B6.3	F54B11.8
F15B9.8	C53C7.1	D1007.1	F47F6.3	F21G4.1		R02E12.4	Y7A5A.8	Y51H4A.32	F19C6.5	F54B3.4
F15E11.12	C53C9.2	D1007.13	F47G4.6	F21H12.7		R02E12.6	Y7A5A.9	Y51H4A.5	F19C7.3	F54C1.8
F15E11.15	C53C9.3	D1007.3	F47G4.8	F21H7.12		R02F11.1	Y82E9BL.5	Y51H7BR.5	F19C7.8	F54C1.9
F15E11.4	C53D6.3	D1014.5	F47H4.11	F22A3.2		R03A10.2	Y82E9BR.22	Y51H7C.8	F19G12.3	F54D10.9
F15E6.5	C54A12.2	D1022.9	F48B9.4	F22A3.3		R04B5.6	Y82E9BR.3	Y53F4A.2	F19H8.2	F54D11.3
F15H10.8	C54C8.4	D1025.3	F48C1.8	F22A3.7		R05A10.1	Y8A9A.5	Y53F4B.14	F19H8.5	F54D11.4
F16F9.2	C54D10.3	D1037.5	F48C1.9	F22B5.5		R05D7.1	Y8G1A.1	Y53F4B.37	F20A1.2	F54D12.8
F16F9.3	C54D10.4	D1044.3	F48C11.1	F22B5.6		R05H10.7	Y92C3B.1	Y54E10BL.3	F20A1.7	F54E7.6
F16H6.1	C54D10.9	D1044.8	F48D6.3	F22B7.4		R06C1.6	Y94H6A.12	Y54F10AM.1	F20B10.1	F54F7.7
F17A2.3	C54D2.1	D1046.4	F48E3.9	F22D6.15		R06C7.10	ZC132.2	Y54G11A.9	F20B6.2	F54G2.2
F17A9.3	C54E4.4	D1046.5	F48F5.3	F22D6.8		R06F6.6	ZC190.10	Y54G2A.10	F20B6.3	F54G8.2
F17B5.6	C54F6.10	D1054.5	F48F7.7	F22E10.1		R06F6.7	ZC204.10	Y54G2A.27	F20D12.3	F54H5.3
F17C11.11	C54F6.12	D1054.7	F48G7.13	F22E10.2		R07B1.8	ZC239.20	Y54G2A.38	F20D6.3	F55A3.6
F17C11.12	C54F6.4	D1054.9	F48G7.8	F22E12.3		R07B1.9	ZC334.11	Y54G2A.42	F20G2.2	F55A4.10
F17C11.3	C54F6.8	D1065.5	F49A5.9	F22F4.4		R07B5.7	ZC373.2	Y54G2A.44	F20G2.5	F55A4.4
F17C11.5	C54F6.9	D1069.1	F49B2.4	F22F7.4		R07C12.1	ZC373.6	Y54G9A.9	F21A10.1	F55A8.1
F17C8.7	C54G4.2	D1069.2	F49E11.10	F22H10.2		R07C3.11	ZC477.10	Y57A10B.2	F21A10.4	F55C10.3
F17E9.5	C54G4.4	D1069.4	F49E11.3	F22H10.6		R07C3.13	ZC513.12	Y57G11C.5	F21C10.7	F55C7.7
F18A1.1	C54G7.3	D1081.5	F49F1.10	F23A7.3		R07E3.2	ZC513.8	Y57G11C.52	F21C10.9	F55C9.12
F18C5.5	C55A1.14	D2013.2	F49F1.5	F23A7.4		R08A2.7	ZK1010.6	Y57G7A.2	F21D12.5	F55F1.1
F18E2.1	C55B7.12	D2013.3	F49H12.7	F23A7.8		R08B4.4	ZK1098.11	Y57G7A.3	F21D5.3	F55F1.3
F18E9.4	C55B7.3	D2021.2	F49H6.5	F23B2.12		R08B4.5	ZK1251.2	Y57G7A.7	F21E9.2	F55F8.8
F18E9.7	C55B7.4	D2023.3	F52C6.14	F23B2.13		R08C7.13	ZK1251.7	Y59E9AL.1	F21F12.1	F55G1.3
F18F11.4	C55B7.6	D2024.3	F52D1.2	F23D12.11		R08F11.7	ZK131.10	Y59E9AR.4	F21F8.11	F55G11.9
F19B2.5	C55C2.5	D2024.4	F52D10.4	F23D12.6		R09B3.2	ZK1320.13	Y5F2A.2	F21G4.5	F56A11.3
F19C7.1	C55C3.1	D2030.9	F52D10.5	F23D12.7		R09B3.3	ZK177.9	Y60A3A.21	F21H12.2	F56A11.7
F19C7.2	C55C3.6	D2063.1	F52D2.5	F23F1.10		R09B5.2	ZK287.3	Y60A3A.23	F21H12.4	F56A3.5
F19C7.4	C55C3.8	D2092.6	F52E1.8	F23F1.2		R09B5.3	ZK287.8	Y60A9A.1	F21H7.3	F56A8.3
F19C7.5	C56A3.3	D2092.8	F52E10.4	F23F1.7		R09B5.9	ZK287.9	Y62H9A.3	F22A3.3	F56B3.6
F19C7.6	C56C10.4	D2096.6	F52F10.2	F23F12.12		R09E10.5	ZK381.8	Y62H9A.5	F22B3.9	F56B3.9
F19C7.7	C56E6.5	DC2.2	F52H2.3	F23F12.4		R09E10.8	ZK384.2	Y64G10A.10	F22B5.3	F56B6.2
F19H6.1	C56E6.6	DC2.5	F53A2.2	F23H11.7		R09H3.3	ZK39.6	Y66A7A.1	F22D3.5	F56C3.6
F19H6.5	C56G2.4	DY3.5	F53A3.3	F23H12.8		R102.2	ZK39.7	Y67A6A.1	F22D6.10	F56D12.1
F19H6.7	C56G3.2	E01G4.6	F53A9.1	F23H12.9		R10D12.10	ZK470.6	Y67D8C.8	F22E10.1	F56D12.5
F19H8.2	D1005.6	E01G6.1	F53A9.2	F25A2.1		R10E4.2	ZK520.5	Y68A4A.13	F22E10.2	F56D2.4
F19H8.4	D1007.1	E02A10.2	F53A9.4	F25B3.2		R10H10.4	ZK525.1	Y69A2AR.28	F22E10.3	F56D6.14
F19H8.5	D1007.13	E02C12.10	F53A9.6	F25B4.8		R11.4	ZK616.2	Y69A2AR.3	F22E10.5	F56D6.9
F20D6.3	D1009.3	E02C12.6	F53A9.7	F25C8.1		R11G1.1	ZK632.9	Y69A2AR.4	F22E12.2	F56E10.3
F20D6.6	D1014.1	E02C12.8	F53A9.8	F25C8.2		R11G10.2	ZK652.2	Y69F12A.3	F22E12.3	F56F3.4
F20G2.1	D1014.5	E02H1.6	F53B6.8	F25D1.2		R11G11.14	ZK652.3	Y71A12B.8	F22E5.1	F56F4.3
F20G2.3	D1022.3	E02H4.2	F53B6.9	F25E2.4		R11H6.4	ZK666.11	Y71A12C.1	F22E5.16	F56F4.9
F20G2.5	D1022.9	E02H9.5	F53B7.7	F25H5.8		R12A1.3	ZK678.6	Y71F9AL.6	F22E5.8	F56H6.2
F20G2.6	D1037.5	E03A3.6	F53C11.9	F25H8.7		R12B2.7	ZK688.4	Y71F9B.4	F22F1.2	F57A10.5
F21C10.6	D1044.3	E03G2.4	F53C3.6	F25H9.7		R12C12.3	ZK75.2	Y71G12B.14	F22F4.1	F57A8.1
F21D5.3	D1044.7	E03H12.3	F53C3.8	F26A1.10		R13A5.11	ZK813.1	Y71H2B.4	F22F7.1	F57A8.4
F21F3.2	D1044.8	E03H12.5	F53F1.1	F26A1.15		R13D7.7	ZK813.2	Y71H9A.1	F22F7.3	F57B7.3
F21F8.11	D1054.12	E03H12.6	F53F1.6	F26A1.4		R13G10.4	ZK813.3	Y73B6A.2	F22H10.6	F57C12.1
F21F8.3	D1054.9	E03H4.10	F53F1.7	F26A1.6		R31.3	ZK816.3	Y73B6BL.32	F23B12.4	F57C7.3
F21F8.4	D1065.5	E03H4.7	F53F4.1	F26D10.13		R53.8	ZK863.2	Y73B6BL.35	F23B2.10	F57C7.4
F21F8.6	D1069.1	E04A4.2	F53F4.15	F26D2.3		T01C3.6	ZK899.5	Y73C8C.2	F23B2.11	F57G8.7
F21H12.7	D1069.4	E04D5.3	F53F4.6	F26E4.12		T01D1.6		Y73C8C.9	F23B2.12	F57H12.5
F21H7.1	D1079.1	EEED8.6	F53G12.13	F26E4.2		T01G9.1		Y75B8A.10	F23C8.12	F58A4.7
F21H7.12	D1081.5	EGAP1.3	F53H2.2	F26F12.5		T02C5.3		Y75B8A.11	F23G4.1	F58D5.5
F21H7.14	D2005.2	EGAP2.3	F53H4.3	F26F2.5		T03D8.5		Y76B12C.4	F23H12.4	F58E1.7
F21H7.3	D2005.6	EGAP7.1	F53H4.4	F26F2.8		T03D8.7		Y7A5A.10	F25B5.1	F58E10.5
F21H7.4	D2023.3	EGAP9.2	F54B11.1	F26G1.7		T03F1.11		Y7A5A.11	F25C8.1	F58E6.10
F22A3.1	D2024.4	EGAP9.4	F54B11.8	F26G1.9		T03G11.5		Y7A5A.2	F25C8.2	F58E6.3
F22A3.6	D2062.1	F01D4.2	F54B8.4	F26G5.5		T04C9.4		Y7A5A.6	F25D7.3	F58F9.8
F22A3.7	D2062.7	F01D4.8	F54C9.3	F26H11.1		T04D1.2		Y7A5A.8	F25E2.1	F58H7.1
F22B3.9	D2092.3	F01D5.1	F54D10.2	F27B10.1		T04H1.1		Y80D3A.11	F25E5.10	F58H7.2
F22B5.5	D2092.6	F01D5.10	F54D10.4	F27D9.6		T04H1.3		Y82E9BL.3	F25E5.3	F59A6.11
F22D6.15	D2096.3	F01D5.2	F54D12.8	F27E5.5		T04H1.6		Y82E9BR.3	F25E5.7	F59A7.7
F22E10.1	D2096.6	F01D5.3	F54F11.1	F28A12.2		T05A10.2		Y82E9BR.7	F25E5.9	F59B1.10
F22E10.2	DH11.1	F01D5.5	F55A12.6	F28B12.1		T05A7.11		Y92C3B.1	F25G6.3	F59B1.7
F22E5.1	DH11.2	F01D5.6	F55A4.7	F28B4.3		T05A7.2		Y94H6A.12	F25G6.4	F59B1.9
F22E5.4	DY3.5	F01D5.7	F55B11.5	F28D1.11		T05A7.7		Y97E10AL.1	F25G6.6	F59B10.2
F22F1.3	E01G6.1	F01F1.8	F55C10.2	F28D1.6		T05B4.11		Y9C9A.1	F25G6.7	F59B10.4
F22F4.1	E02A10.2	F01G10.10	F55C12.7	F28E10.5		T05B4.3		Y9C9A.16	F25H5.1	F59C6.3
F22F4.4	E02C12.10	F01G10.3	F55C9.12	F28F5.4		T05F1.5		ZC15.10	F25H8.3	F59C6.6
F22F7.1	E02C12.2	F01G10.4	F55F8.8	F28F5.6		T05G5.10		ZC190.10	F25H8.6	F59D8.1
F22G12.1	E02C12.6	F01G10.6	F55G1.3	F28G4.5		T05G5.12		ZC196.4	F26A1.8	F59E11.8
F22G12.7	E02H4.5	F01G12.6	F55G11.5	F28H1.4		T05G5.4		ZC239.17	F26A3.4	F59F3.2
F22H10.2	E02H4.7	F02A9.1	F55G11.6	F28H7.10		T06A10.2		ZC266.1	F26C11.2	F59H6.3
F22H10.6	E03A3.6	F02C12.2	F55H12.4	F28H7.2		T06D8.3		ZC334.10	F26C11.3	F59H6.7
F23A7.5	E03D2.1	F02C12.4	F56A3.5	F28H7.3		T06G6.12		ZC334.11	F26D2.11	H01G02.3
F23B2.12	E03G2.4	F02C12.5	F56C3.9	F28H7.6		T07A5.5		ZC373.2	F26D2.16	H03G16.4
F23C8.1	E03H12.5	F02D8.2	F56C4.4	F29B9.12		T07A9.9		ZC395.5	F26D2.3	H04D03.1
F23F12.13	E03H12.6	F02E11.1	F56C9.5	F29B9.6		T07C4.2		ZC487.4	F26E4.3	H08J11.2
F23F12.3	E03H4.11	F02E11.3	F56D1.5	F29C4.4		T07D10.2		ZC84.7	F26F12.4	H09F14.1
F23F12.4	E03H4.4	F02E8.6	F56D6.10	F29F11.4		T07D10.6		ZK1098.11	F26F2.2	H11L12.1
F23H12.4	E04A4.2	F02E9.3	F56D6.12	F30A10.11		T07G12.8		ZK1290.1	F26F2.6	H12D21.6
F23H12.5	E04A4.6	F07A11.1	F56D6.15	F30A10.13		T08A9.10		ZK131.10	F26G1.6	H12I13.1
F25A2.1	E04F6.7	F07A11.2	F56D6.8	F30F8.5		T08A9.5		ZK1320.13	F27B3.8	H13N06.5
F25B4.4	EEED8.6	F07A11.4	F56G4.7	F30H5.5		T08A9.6		ZK1321.1	F27C1.13	H14A12.4
F25C8.1	EGAP2.3	F07B10.1	F56H6.6	F31D4.6		T08B1.2		ZK218.1	F27C8.2	H16O14.1
F25C8.2	F01D4.3	F07B10.2	F56H9.2	F31D4.9		T08B2.10		ZK262.4	F27D4.5	H17B01.4
F25D1.3	F01D4.4	F07B10.7	F57A8.7	F31D5.1		T08D2.8		ZK287.8	F27D9.8	H19M22.3
F25D1.5	F01D4.7	F07C3.1	F57C12.2	F31F4.15		T08E11.6		ZK355.3	F27E5.4	H22D07.1
F25D7.3	F01D4.8	F07C3.3	F57C2.4	F31F6.8		T08G5.10		ZK380.4	F28A10.5	H22K11.3
F25E2.4	F01D5.6	F07C3.8	F57E7.1	F32B4.1		T08G5.12		ZK381.8	F28A10.6	H23L24.3
F25E5.10	F01D5.7	F07C6.2	F57H12.3	F32B6.5		T09A12.5		ZK384.2	F28A12.3	H25K10.5
F25E5.2	F01E11.1	F07E5.1	F57H12.6	F32D1.2		T09B4.5		ZK39.2	F28B1.2	H27M09.5
F25F2.1	F01E11.4	F07E5.8	F58B3.3	F32D8.15		T09B4.6		ZK39.3	F28B4.3	H28G03.1
F25G6.8	F01E11.5	F07E5.9	F58B3.8	F32D8.6		T09B9.3		ZK39.6	F28G4.2	H28G03.2
F25H8.6	F01G10.10	F07F6.5	F58E1.6	F32D8.9		T09H2.1		ZK39.7	F28G4.5	H28O16.1
F25H9.2	F01G10.4	F07F6.6	F58E10.2	F32E10.8		T10B10.6		ZK488.10	F28H6.2	H30A04.1
F25H9.3	F01G10.5	F07F6.9	F58E6.12	F32H5.3		T10B10.9		ZK488.7	F28H7.10	H31B20.1
F26A1.12	F01G10.6	F07G6.6	F58E6.13	F32H5.6		T10B11.1		ZK512.7	F28H7.2	H35N03.1
F26A1.9	F02A9.1	F07G6.7	F58G1.7	F32H5.7		T10B9.8		ZK520.5	F28H7.4	H35N09.2
F26A3.5	F02C12.2	F07H5.6	F58G6.6	F33A8.10		T10B9.9		ZK550.2	F29A7.3	H36L18.1
F26B1.4	F02C12.4	F07H5.9	F59A6.3	F33A8.7		T10E10.4		ZK632.9	F29B9.12	H37A05.4
F26D10.13	F02D8.2	F08A10.1	F59A7.12	F33D11.8		T10G3.4		ZK652.2	F29C12.6	K01A2.3
F26D2.3	F02D8.3	F08A8.1	F59A7.2	F33E2.7		T10G3.6		ZK666.7	F29C6.1	K01A6.4
F26F2.1	F02E11.1	F08A8.2	F59A7.4	F33G12.7		T10H4.11		ZK673.1	F29D10.3	K01B6.3
F26G1.4	F02E9.3	F08B1.1	F59B1.9	F34D6.2		T12D8.10		ZK673.5	F29G6.1	K01D12.2
F26G1.5	F02G3.1	F08B4.2	F59B10.6	F34D6.9		T13A10.11		ZK688.4	F30H5.3	K01D12.4
F27B3.2	F02H6.1	F08C6.1	F59E11.1	F34H10.4		T13A10.2		ZK697.14	F31A9.3	K01G5.3
F27C1.8	F02H6.6	F08C6.4	F59E11.16	F34H10.5		T13B5.4		ZK697.8	F31A9.4	K02A2.2
F27C8.1	F07A11.1	F08C6.6	F59E11.2	F35B12.6		T13F2.8		ZK809.8	F31B12.3	K02D10.2
F27C8.2	F07A5.2	F08D12.2	F59E11.6	F35B12.7		T13F3.2		ZK813.2	F31D5.5	K02D7.5
F28A12.1	F07A5.5	F08D12.3	F59E11.7	F35C11.4		T13F3.7		ZK813.3	F31E8.2	K02D7.6
F28A12.2	F07B10.2	F08F1.6	F59E12.3	F35C12.3		T14G12.4		ZK816.1	F31F4.15	K02E2.1
F28A12.3	F07B10.7	F08F3.4	F59F3.6	F35C5.10		T15B7.12		ZK816.5	F31F4.18	K02E2.2
F28A12.4	F07B7.12	F08G2.5	H02I12.2	F35C5.11		T16A1.8		ZK836.3	F31F4.4	K02E7.5
F28B4.3	F07C3.3	F08G2.6	H06I04.7	F35D11.1		T17A3.1		ZK849.5	F31F4.7	K02E7.6
F28C6.1	F07C3.7	F08G5.4	H08J19.1	F35D11.10		T17A3.10		ZK856.7	F31F6.6	K02F2.2
F28E10.5	F07C4.11	F08G5.6	H12D21.13	F35D11.8		T17A3.12			F31F7.2	K02F6.2
F28F5.6	F07E5.1	F08G5.7	H12I13.5	F35D11.9		T18D3.4			F32A7.7	K02F6.4
F28G4.2	F07E5.9	F09A5.2	H12I13.6	F35E12.1		T18D3.5			F32B4.6	K02F6.9
F28G4.4	F07F6.1	F09B12.1	H12I19.4	F35E12.2		T19D7.6			F32B5.7	K02G10.1
F28H6.2	F07F6.5	F09C12.2	H13N06.2	F35E12.3		T19H12.1			F32D1.3	K02G10.7
F28H7.3	F07F6.9	F09C12.8	H23L24.3	F35E12.4		T19H12.6			F32D1.8	K03A11.5
F29C12.1	F07G11.4	F09C6.1	H23N18.2	F35E12.7		T19H5.2			F32D8.1	K03D10.1
F29C6.1	F07G11.9	F09C6.13	H23N18.6	F35E12.8		T20B3.7			F32D8.12	K03H6.1
F29G6.3	F07G6.6	F09C6.2	H24O09.1	F35E12.9		T20B5.2			F32H2.11	K03H6.2
F30A10.2	F07H5.6	F09E5.10	H27D07.6	F35E2.8		T20D4.7			F32H2.5	K04A8.10
F30B5.1	F07H5.9	F09E5.4	H31B20.1	F35F10.4		T20F10.4			F32H5.4	K04A8.3
F30F8.5	F08A10.1	F09E8.1	H32K16.2	F35F10.5		T20H4.2			F32H5.7	K04A8.5
F31D4.8	F08B4.2	F09E8.6	H32K21.1	F35G12.7		T21E8.1			F33C8.4	K04C1.1
F31D5.5	F08C6.1	F09F3.9	H34I24.3	F35G8.1		T22A3.8			F33D11.5	K04E7.3
F31F4.11	F08D12.2	F09F9.2	H39E20.1	F35H10.5		T22B7.5			F33D4.3	K04F10.2
F31F4.15	F08D12.3	F09G2.6	K01A12.2	F35H10.6		T22F3.10			F33D4.6	K04G2.7
F31F6.5	F08F1.1	F09G8.4	K01A2.10	F35H8.4		T22G5.4			F33E2.10	K05C4.3
F31F7.2	F08F8.6	F09G8.8	K01A2.2	F35H8.7		T22G5.7			F33E2.4	K05D4.4
F32A5.8	F08G2.6	F10A3.1	K01A6.4	F36A2.12		T22H6.3			F33E2.7	K05F6.10
F32A7.6	F08G5.2	F10A3.2	K01B6.2	F36A4.2		T23B3.2			F33H2.8	K05F6.8
F32A7.7	F08G5.7	F10A3.3	K01C8.2	F36A4.4		T23B7.1			F34D10.6	K05G3.2
F32B4.8	F08H9.12	F10B5.3	K01D12.7	F36A4.5		T23E1.2			F35A5.1	K06A1.2
F32B6.10	F08H9.9	F10C2.3	K01G5.8	F36A4.8		T23E7.6			F35A5.4	K06A1.3
F32B6.4	F09A5.2	F10C2.7	K01H12.1	F36D1.4		T23F2.3			F35B12.4	K06A4.6
F32B6.5	F09B12.1	F10D11.5	K02A11.4	F36D1.7		T23F2.4			F35B12.6	K06C4.10
F32D8.2	F09C12.1	F10D11.6	K02C4.2	F36D4.4		T23F6.1			F35B12.7	K06C4.5
F32D8.3	F09C12.2	F10D2.1	K02E11.6	F36F12.4		T23F6.3			F35B3.1	K06G5.3
F32E10.3	F09C12.8	F10D2.10	K02E2.4	F36F12.5		T24C4.2			F35C11.4	K06H7.8
F32E10.7	F09C3.2	F10D2.11	K02E2.7	F36F2.1		T24D8.3			F35C12.2	K07A12.6
F32G8.2	F09C6.1	F10D2.2	K02E7.1	F36F2.8		T24D8.5			F35C12.3	K07A3.3
F32H2.8	F09C6.11	F10D2.4	K03A1.4	F36G9.12		T24E12.11			F35C5.11	K07C11.1
F32H5.1	F09C6.13	F10D2.5	K03B8.7	F36G9.14		T24F1.7			F35C5.12	K07D4.6
F32H5.4	F09C6.2	F10D2.6	K03E6.4	F36H1.11		T25G12.2			F35D11.11	K07E3.4
F33A8.7	F09C6.3	F10E7.1	K03H1.10	F36H1.5		T26C12.3			F35D11.2	K07E8.5
F33D11.3	F09E10.7	F10E7.10	K03H1.3	F36H12.1		T26H2.1			F35D11.7	K07F5.11
F33D11.4	F09E5.10	F10F2.3	K04C2.5	F36H12.15		T26H2.10			F35D11.8	K08A2.1
F33D4.1	F09E5.4	F10F2.6	K04E7.3	F36H12.3		T26H5.9			F35D11.9	K08A8.2
F33D4.2	F09E8.5	F10F2.9	K04F1.9	F36H12.4		T27A3.3			F35D2.1	K08B12.2
F33D4.6	F09E8.6	F10G7.12	K04G11.2	F36H12.5		T27A3.8			F35D2.5	K08B12.3
F33E2.7	F09F3.10	F10G7.8	K05C4.8	F36H9.5		T27E4.4			F35E12.4	K08B4.5
F33H12.2	F09F3.9	F10G8.9	K05F1.2	F37A4.2		T27E9.2			F35E12.7	K08C7.4
F33H12.5	F09G2.5	F11A1.2	K05F1.7	F37A4.3		T27F6.8			F35E12.8	K08C7.5
F33H2.8	F09G2.6	F11A5.3	K05F6.10	F37A4.4		T28B8.5			F35E12.9	K08D10.5
F35B12.2	F09G8.4	F11A5.4	K06A4.6	F37A4.6		T28C6.10			F35E8.8	K08D10.7
F35B3.4	F09G8.5	F11A6.2	K06A4.7	F37B1.3		T28D9.9			F35F10.4	K08D10.9
F35C11.4	F09G8.8	F11C1.3	K06B4.6	F37B1.8		T28F2.6			F35F10.9	K08D12.2
F35C11.6	F10A3.1	F11C7.6	K06B9.2	F37B4.7		T28F2.8			F35G2.4	K08D9.2
F35C5.2	F10A3.2	F11C7.7	K06C4.10	F37C12.10		T28F4.2			F35H10.10	K08F4.11
F35C5.4	F10B5.3	F11D11.11	K06C4.5	F37C12.14		T28H10.4			F35H10.3	K08H2.1
F35C5.5	F10B5.4	F11D11.3	K07A12.6	F37C4.7		VH15N14R.1			F35H10.4	K08H2.9
F35C5.6	F10C2.7	F11D5.7	K07C11.5	F37D6.3		W01B11.2			F35H12.1	K09A11.5
F35C5.7	F10D11.5	F11E6.10	K07D4.5	F37E3.2		W01B6.7			F35H12.7	K09A9.2
F35C5.8	F10D11.6	F11E6.8	K07E12.2	F38A1.1		W01D2.1			F36D1.2	K09B11.4
F35C5.9	F10D2.2	F11E6.9	K07F5.17	F38A1.6		W01D2.6			F36D1.6	K09B11.5
F35D11.10	F10D2.4	F11G11.1	K07F5.2	F38A1.9		W02A2.3			F36D1.8	K09C6.1
F35D11.7	F10D2.5	F11G11.10	K07F5.3	F38A5.3		W02A2.9			F36D3.9	K09C8.3
F35D11.8	F10E7.10	F11G11.12	K07F5.5	F38B6.3		W02B12.3			F36D4.4	K09C8.4
F35D2.2	F10F2.3	F11G11.9	K07H8.11	F38B7.2		W02C12.1			F36F12.5	K09E2.1
F35E12.1	F10F2.4	F12E12.11	K08B4.7	F38E1.10		W02D3.6			F36F12.6	K09E4.1
F35E12.10	F10F2.6	F12F6.8	K08C7.4	F38E11.7		W02D7.2			F36F2.1	K09E4.5
F35E12.3	F10F2.7	F12F6.9	K08C7.5	F38E9.6		W02D7.8			F36F2.5	K09H9.3
F35E12.5	F10F2.8	F13A2.2	K08C9.7	F38H4.2		W02D9.6			F36G3.1	K10C8.2
F35E12.6	F10F2.9	F13A7.11	K08D10.11	F38H4.6		W02D9.7			F36G9.15	K10C9.7
F35E12.7	F10G2.3	F13A7.12	K08D12.5	F39B2.6		W03A3.1			F36G9.8	K10G6.3
F35E12.8	F10G2.7	F13A7.2	K08D12.7	F39E9.3		W03B1.1			F36H1.5	K10H10.4
F35E12.9	F10G7.12	F13A7.9	K08E7.4	F40A3.4		W03C9.5			F36H9.5	K11D2.2
F35E2.2	F10G7.7	F13B12.3	K08F4.8	F40B5.1		W03D8.3			F37B1.6	K11D2.4
F35E8.11	F10G8.9	F13B12.4	K08F9.3	F40G12.6		W03F11.4			F37B12.1	K11D9.1
F35E8.12	F11A5.10	F13B6.1	K08G2.8	F40G9.10		W03F8.6			F37B4.7	K11D9.2
F35E8.2	F11A5.13	F13B6.2	K08H2.9	F40G9.7		W03F9.4			F37C12.12	K11E4.3
F35E8.8	F11A5.4	F13C5.3	K09C4.4	F40H3.2		W03G1.5			F37C4.1	K11G12.2
F35F10.4	F11A5.5	F13D11.2	K09C6.2	F40H3.3		W03G1.7			F37C4.6	K11G9.5
F35F10.5	F11C1.3	F13D11.4	K09C6.8	F40H7.12		W04B5.2			F38A1.7	K11H12.10
F35F10.7	F11C1.4	F13D12.6	K09C6.9	F41B5.2		W04C9.3			F38A3.1	K12C11.7
F35G2.5	F11C3.2	F13D12.9	K09C8.2	F41C6.5		W05B10.3			F38A3.2	K12D12.3
F35H12.5	F11C7.2	F13D2.1	K09C8.3	F41E6.15		W06A7.5			F38B2.1	K12G11.3
F35H8.7	F11C7.3	F13E9.14	K09C8.7	F41E7.6		W06G6.10			F38B2.6	K12G11.6
F36A4.10	F11C7.6	F13E9.8	K09E10.1	F41E7.8		W06G6.11			F38B6.4	K12H6.1
F36D3.4	F11C7.7	F13E9.9	K09E2.1	F41G3.1		W07B8.4			F38B6.5	K12H6.11
F36D4.1	F11D11.11	F13G3.2	K09E2.2	F41G3.16		W07E6.3			F38B6.7	K12H6.3
F36F12.6	F11D11.3	F13G3.3	K09E3.4	F41G3.17		W07G1.6			F38C2.4	K12H6.6
F36G3.1	F11D11.5	F13H6.3	K09E4.6	F41G3.18		W08A12.2			F38E1.10	M01A12.4
F36G9.11	F11D5.7	F13H8.4	K09E9.4	F41G3.21		W08D2.6			F38E11.12	M01B2.2
F36G9.12	F11E6.10	F13H8.5	K09F5.3	F42A10.9		W08F4.11			F38E11.4	M01D1.7
F36G9.13	F11G11.9	F14B4.2	K09H11.11	F42A6.1		W08F4.5			F39B3.2	M01E11.6
F36G9.14	F12A10.4	F14B6.2	K09H11.6	F42A6.2		W09G12.7			F39B3.3	M01G12.7
F36G9.5	F12D9.1	F14B8.5	K10B3.6	F42A9.3		W09H1.3			F39C12.2	M01H9.3
F36G9.8	F12E12.11	F14B8.7	K10C2.5	F42A9.4		W10C4.1			F39C12.3	M01H9.5
F36H1.10	F12F3.1	F14D12.6	K10C2.6	F42A9.9		W10C8.4			F39E9.1	M02G9.1
F36H1.5	F13A2.2	F14D2.14	K10C9.1	F42C5.2		W10C8.6			F39E9.12	M02G9.3
F36H12.16	F13A7.10	F14D7.8	K10D11.2	F42C5.5		W10G11.1			F39G3.5	M02H5.10
F36H2.5	F13A7.9	F14E5.1	K10D2.4	F42D1.3		W10G6.1			F40A3.6	M02H5.7
F36H5.1	F13B12.3	F14E5.5	K10G6.4	F42F12.10		Y102A11A.7			F40B5.3	M03A1.8
F36H9.5	F13B12.4	F14F3.4	K10G6.5	F42F12.6		Y105C5A.13			F40E10.2	M03E7.3
F37B1.2	F13C5.3	F14F9.1	K11D12.4	F42F12.9		Y105C5A.17			F40E10.4	M03F4.2
F37B1.8	F13C5.5	F14F9.2	K11E4.3	F42G10.1		Y105C5B.11			F40E10.5	M04C3.2
F37B12.1	F13D11.2	F14F9.3	K11G12.1	F42G8.7		Y105C5B.16			F40F8.8	M04G7.3
F37B4.7	F13D12.9	F14F9.4	K11G9.5	F42H10.2		Y105C5B.29			F40F9.10	M05D6.3
F37C4.1	F13D2.1	F14F9.7	K11G9.6	F43C1.5		Y105E8B.11			F40G12.4	M05D6.8
F37C4.6	F13E9.10	F14H12.1	K11H12.10	F43C11.10		Y106G6H.3			F40G12.5	M110.8
F38A1.1	F13E9.14	F14H12.2	K12B6.9	F43C11.12		Y106G6H.8			F40G12.6	M117.3
F38A1.10	F13E9.4	F14H12.3	K12C11.6	F43C11.3		Y10G11A.2			F40G9.7	M151.1
F38A1.4	F13E9.8	F14H3.10	K12G11.3	F43C11.6		Y110A2AL.1			F40H3.2	M153.5
F38A1.7	F13G3.8	F14H8.4	K12H4.6	F43C9.3		Y110A2AL.3			F40H3.5	M162.5
F38A1.9	F13H10.5	F15A2.3	M01B2.2	F43E2.5		Y110A2AL.4			F40H7.2	M163.3
F38A5.3	F13H10.9	F15A2.5	M01D1.1	F43E2.9		Y110A2AL.9			F41A4.1	M199.8
F38B6.4	F13H6.3	F15A4.9	M01D1.2	F43G9.13		Y110A2AM.1			F41B4.2	M28.1
F38B6.5	F13H8.5	F15A8.6	M01D1.7	F44A6.5		Y111B2A.2			F41C3.11	M4.1
F38B7.2	F13H8.6	F15B10.1	M01G12.14	F44B9.2		Y116A8C.44			F41D3.6	M7.7
F38C2.4	F14B6.2	F15B9.1	M02B7.7	F44D12.9		Y116F11A.1			F41D3.9	M88.3
F38C2.7	F14B6.4	F15B9.6	M02D8.7	F44E2.9		Y11D7A.3			F41D9.3	R01B10.2
F38E11.9	F14B6.5	F15B9.7	M02E1.3	F44E5.1		Y17D7B.3			F41E6.2	R02C2.3
F38H4.4	F14D7.6	F15B9.8	M02G9.2	F44E5.3		Y17G7B.1			F41E7.3	R02C2.5
F39D8.2	F14D7.8	F15D3.4	M02G9.3	F44E7.3		Y17G7B.22			F41F3.4	R02F11.2
F39D8.3	F14F11.1	F15D4.4	M02H5.11	F44F4.1		Y17G9A.1			F41G3.19	R02F2.1
F39E9.1	F14F4.3	F15E11.4	M02H5.6	F44F4.5		Y17G9B.1			F41G3.2	R02F2.5
F39E9.11	F14F7.3	F15E6.2	M02H5.9	F44F4.9		Y17G9B.2			F41G4.3	R03G5.1
F39E9.12	F14F8.8	F15G9.4	M03D4.3	F44G3.14		Y17G9B.7			F41H10.7	R03G5.6
F39E9.2	F14F9.1	F15G9.6	M03E7.3	F44G4.3		Y1A5A.1			F41H10.8	R03H10.2
F39G3.2	F14H12.1	F15H10.1	M04C7.4	F44G4.6		Y1H11.2			F42A10.8	R03H10.6
F40D4.12	F14H12.2	F15H10.7	M04D8.3	F45C12.11		Y22D7AR.10			F42A6.2	R03H4.1
F40F12.7	F14H12.3	F15H10.8	M117.3	F45D3.1		Y22D7AR.5			F42A8.1	R04E5.8
F40F4.6	F14H3.10	F15H9.4	M117.6	F45G2.5		Y23B4A.1			F42D1.2	R04E5.9
F40F8.5	F14H3.8	F16B4.2	M151.6	F45H10.2		Y23H5A.2			F42D1.3	R05F9.1
F40F8.7	F14H8.4	F16B4.3	M162.11	F45H10.5		Y23H5A.4			F42G10.1	R05G6.12
F40F9.3	F15A2.3	F16B4.9	M162.5	F45H11.2		Y23H5B.12			F42G4.3	R05H11.2
F40F9.5	F15A2.5	F16D3.7	M162.8	F45H11.5		Y24F12A.3			F42H10.5	R06A10.2
F40F9.9	F15A4.5	F16F9.2	M7.8	F46A8.6		Y25C1A.2			F43C11.1	R06A4.10
F41B5.2	F15A4.6	F16H6.1	R01H10.5	F46B3.4		Y27F2A.5			F43C11.2	R06B9.1
F41B5.3	F15A4.8	F16H6.10	R02C2.4	F46B6.13		Y32G9A.10			F43C11.8	R06B9.5
F41B5.7	F15A4.9	F16H6.2	R02E12.4	F46C3.2		Y37D8A.19			F43D9.1	R06C1.6
F41C3.11	F15B9.2	F17A2.3	R03G5.3	F46C5.3		Y37D8A.6			F43E2.5	R07A4.3
F41C6.4	F15D3.4	F17A9.3	R04A9.1	F46E10.11		Y37E11AL.2			F43G9.8	R07C3.12
F41C6.5	F15E11.4	F17B5.10	R04B5.1	F46F11.3		Y37E11B.1			F43H9.2	R07H5.9
F41C6.7	F15E6.5	F17B5.6	R04B5.11	F46F11.4		Y37E11B.10			F44A6.5	R08A2.1
F41D9.2	F15G9.4	F17C11.11	R04B5.6	F46F2.3		Y37E11B.7			F44B9.1	R08C7.11
F41E6.12	F15G9.6	F17C11.3	R04D3.1	F46F2.5		Y37E3.7			F44B9.2	R08C7.3
F41E6.14	F15H10.7	F17C8.7	R05C11.2	F46F3.3		Y38E10A.11			F44C8.9	R08E5.1
F41E6.2	F15H10.8	F17E9.11	R05F9.13	F46G11.4		Y38E10A.13			F44D12.9	R08E5.3
F41F3.3	F16B12.1	F17E9.5	R05F9.8	F46H5.5		Y38E10A.15			F44E7.7	R08F11.7
F41H10.3	F16B12.8	F18A1.1	R05G6.5	F46H5.8		Y38E10A.16			F44F4.11	R09A8.4
F41H10.7	F16D3.7	F18A1.7	R05G9.1	F46H6.5		Y38E10A.25			F44G3.10	R09B5.12
F41H10.8	F16F9.3	F18A11.1	R05G9R.1	F47B10.7		Y38E10A.26			F44G4.7	R09B5.13
F42A10.9	F16H6.1	F18A12.1	R05H10.1	F47B3.7		Y38F1A.4			F45C12.9	R09B5.5
F42A9.4	F16H6.2	F18C5.1	R06A10.1	F47C10.1		Y38F2AL.2			F45D11.1	R09D1.12
F42A9.7	F17A2.1	F18C5.5	R07B1.8	F47C10.2		Y38H6A.2			F45E1.3	R09D1.6
F42A9.9	F17A2.3	F18E2.6	R07B7.15	F47C12.6		Y38H6C.15			F45E4.3	R09E10.2
F42C5.10	F17B5.1	F18E3.6	R07C12.4	F47D12.1		Y38H6C.5			F45E4.4	R09G11.2
F42C5.7	F17B5.5	F18E9.4	R07E3.3	F47D12.3		Y38H8A.5			F45F2.13	R106.1
F42E11.3	F17B5.6	F18F11.3	R07E4.3	F47D12.6		Y39A1A.20			F45F2.4	R107.6
F42G2.4	F17C8.7	F18F11.4	R07G3.2	F47F2.1		Y39A1B.2			F45F2.7	R10E4.2
F42G2.5	F17E9.5	F19B10.13	R07H5.10	F47G9.3		Y39A3A.3			F45G2.1	R119.5
F42G2.8	F17E9.8	F19B2.5	R08A2.3	F47H4.10		Y39A3CL.3			F45G2.5	R11G1.1
F42G4.5	F18A1.1	F19B6.4	R08A2.7	F47H4.9		Y39A3CR.4			F45H11.6	R11G10.2
F42G8.11	F18A11.1	F19C6.3	R08F11.7	F48C1.7		Y39B6A.5			F46A8.5	R12A1.2
F42G9.5	F18A12.1	F19C7.1	R09A8.4	F48C11.3		Y39D8B.1			F46B3.17	R12A1.3
F43C1.5	F18C12.1	F19C7.4	R09B3.2	F48E3.7		Y39E4B.11			F46B3.2	R134.2
F43C9.1	F18C12.4	F19C7.6	R09B5.13	F48E3.9		Y39E4B.13			F46B3.3	R13A1.1
F43E2.5	F18C5.1	F19C7.7	R09B5.2	F48E8.8		Y39G10AR.20			F46C3.3	R13A1.8
F43G9.13	F18E2.1	F19F10.8	R09B5.3	F48F5.3		Y39G10AR.5			F46C5.10	R13A5.4
F43G9.8	F18E2.6	F19G12.7	R09B5.8	F48F5.6		Y39H10A.1			F46C5.6	R13D11.8
F43H9.2	F18E3.6	F19H8.4	R09B5.9	F48G7.2		Y39H10A.2			F46C5.7	R13H7.2
F44A6.3	F18E9.7	F19H8.5	R09D1.11	F48G7.4		Y40B10A.1			F46C8.8	R13H9.1
F44C4.3	F18F11.3	F20A1.4	R09D1.7	F49A5.2		Y40B10A.6			F46E10.1	R144.2
F44C8.1	F18F11.4	F20A1.7	R09H3.3	F49A5.7		Y40B1A.1			F46E10.11	R148.5
F44C8.7	F18G5.4	F20A1.8	R102.1	F49C12.12		Y41C4A.10			F46F11.11	R160.1
F44C8.9	F19B6.4	F20B6.3	R106.1	F49C12.13		Y41C4A.17			F46F11.3	R166.1
F44D12.9	F19C6.3	F20C5.4	R10D12.17	F49C12.14		Y41D4A.2			F46F2.3	R166.5
F44E2.4	F19C7.4	F20D1.4	R10D12.7	F49D11.7		Y41D4A.3			F46F5.11	R186.4
F44E5.2	F19C7.5	F20D1.7	R10E11.7	F49E11.4		Y41D4B.1			F46F5.2	R52.6
F44E7.2	F19C7.6	F20D6.3	R10H1.2	F49E12.10		Y41D4B.10			F46G10.3	T01B4.1
F44E7.5	F19C7.8	F20D6.6	R11A5.6	F49E12.9		Y41D4B.5			F46G10.5	T01B6.1
F44E7.7	F19G12.7	F20G2.3	R11F4.3	F49E7.2		Y41D4B.6			F46G10.6	T01C3.6
F44E7.8	F20A1.4	F20G2.4	R11G1.7	F49F1.1		Y41E3.22			F46G11.1	T01C4.1
F44F4.11	F20A1.7	F20G2.5	R11G10.2	F49F1.12		Y43F8A.1			F46G11.2	T01C4.2
F44F4.6	F20D1.7	F21C10.6	R11G11.14	F49F1.3		Y43F8B.9			F46H5.5	T01D1.2
F44F4.7	F20D12.3	F21C3.7	R11H6.4	F49F1.5		Y43F8C.18			F46H5.6	T01D1.6
F44G3.10	F20D6.1	F21F3.2	R12A1.3	F49F1.7		Y43F8C.2			F46H5.8	T01D3.3
F44G3.14	F20G2.1	F21F3.4	R12C12.10	F49H12.7		Y44E3A.3			F47A4.1	T01D3.4
F44G3.6	F20G2.4	F21F8.10	R12E2.14	F52A8.2		Y45F10C.6			F47B10.2	T01D3.7
F45B8.2	F20H11.5	F21F8.4	R12E2.15	F52B11.5		Y46B2A.1			F47B7.7	T01G5.5
F45E1.3	F21A3.1	F21H12.5	R12E2.8	F52D10.1		Y46C8AR.1			F47B8.12	T01H10.1
F45E1.4	F21A3.7	F21H7.14	R134.1	F52D2.8		Y46E12A.1			F47B8.6	T02C5.3
F45E1.5	F21C10.8	F21H7.5	R13A1.10	F52E1.7		Y46G5A.24			F47C12.1	T02D1.4
F45E4.1	F21C10.9	F22A3.1	R13A5.3	F52F10.3		Y46G5A.42			F47C12.2	T02E1.7
F45E4.6	F21D12.1	F22B3.4	R13A5.6	F52F10.4		Y46G5A.43			F47D12.1	T02E1.8
F45E4.8	F21D12.3	F22B5.5	R13D11.6	F52F12.1		Y46H3C.5			F47E1.1	T02E9.3
F45F2.6	F21D9.2	F22B7.10	R148.1	F52F12.5		Y46H3C.6			F47E1.3	T02G5.6
F45G2.8	F21F3.1	F22B8.4	R160.4	F52F12.8		Y46H3D.1			F47F2.1	T02G6.11
F46A8.5	F21F3.2	F22E10.1	R173.4	F52F12.9		Y47D3A.30			F47F6.4	T02G6.2
F46A9.1	F21F8.10	F22E10.3	R186.2	F52H2.3		Y47D3B.6			F47G4.3	T02H6.7
F46A9.3	F21F8.11	F22E10.5	T01B10.5	F52H3.1		Y47G6A.13			F47G4.7	T03D8.4
F46B3.1	F21F8.6	F22E5.1	T01B6.1	F53A3.1		Y47H10A.1			F47G9.3	T03F1.6
F46B3.5	F21H11.2	F22E5.3	T01B7.8	F53A9.1		Y47H9B.2			F48B9.2	T03F7.6
F46B6.9	F21H7.10	F22E5.4	T01C3.10	F53A9.2		Y48A6A.1			F48B9.5	T03G11.10
F46C3.3	F21H7.14	F22F4.1	T01C3.11	F53A9.6		Y48A6B.4			F48C11.2	T03G11.9
F46C5.10	F21H7.5	F22G12.1	T01C3.4	F53B2.8		Y48B6A.10			F48C5.2	T04A6.2
F46C8.6	F22A3.6	F22G12.3	T01D1.8	F53B6.9		Y48B6A.2			F48E3.7	T04B2.7
F46C8.8	F22B3.9	F22G12.7	T01G6.1	F53C11.1		Y48G1BL.1			F48F5.4	T04C10.2
F46E10.1	F22B5.3	F22H10.2	T01G6.3	F53C11.9		Y48G1BM.8			F48G7.4	T04C4.1
F46E10.11	F22B5.5	F23B12.1	T02B5.4	F53C3.11		Y48G1C.9			F49C12.3	T04D1.4
F46F11.3	F22B8.4	F23B2.12	T02D1.7	F53F1.6		Y48G9A.10			F49C5.10	T04F8.9
F46F11.5	F22D6.11	F23B2.4	T02G5.1	F53F4.13		Y49F6B.10			F49C5.11	T04H1.10
F46G10.3	F22E10.1	F23C8.1	T02G5.14	F53F4.15		Y4C6B.3			F49C5.4	T04H1.9
F46G10.4	F22E10.2	F23F12.4	T02G6.7	F53F4.16		Y50E8A.1			F49C5.9	T05A10.1
F46G10.6	F22E10.3	F23F12.6	T02H6.10	F53F4.9		Y51A2D.14			F49D11.6	T05A7.3
F46G11.2	F22E5.3	F23H11.6	T02H6.3	F53F8.6		Y51A2D.9			F49E10.1	T05A7.4
F46H5.8	F22F4.1	F23H12.4	T03F7.3	F53G12.8		Y51H4A.32			F49E10.2	T05A7.7
F47B10.2	F22F7.3	F23H12.5	T03G11.10	F53H4.2		Y51H4A.4			F49E10.4	T05A8.5
F47B10.3	F22F7.6	F23H12.6	T04A6.4	F54B11.10		Y51H4A.9			F49E11.2	T05B4.11
F47B10.7	F23B12.1	F25A2.1	T04B2.6	F54B8.4		Y51H7BR.3			F49E12.12	T05B4.8
F47B8.11	F23B2.12	F25B3.4	T04B2.8	F54C1.6		Y53C12A.7			F49E12.5	T05C1.3
F47B8.4	F23B2.4	F25B3.5	T04C12.8	F54C4.4		Y53C12B.6			F49E12.9	T05E7.2
F47B8.5	F23B2.7	F25D1.3	T04C9.2	F54C9.11		Y53F4A.2			F49E2.1	T05E8.1
F47C10.6	F23C8.1	F25D1.4	T04D3.8	F54C9.3		Y53F4B.11			F49E2.4	T05H10.8
F47C12.6	F23C8.7	F25D1.5	T04F8.7	F54D1.4		Y53F4B.14			F49E7.2	T05H4.4
F47F6.1	F23D12.3	F25D7.3	T04F8.8	F54D12.9		Y53F4B.17			F49F1.1	T06A1.4
F47F6.3	F23F12.13	F25D7.5	T04H1.1	F54D5.4		Y53F4B.20			F49F1.11	T06A10.2
F47G4.3	F23F12.4	F25E2.1	T04H1.3	F54E2.1		Y53F4B.24			F49F1.3	T06C10.6
F47G4.7	F23F12.8	F25E2.4	T05A10.2	F54E4.4		Y53H1A.4			F49F1.6	T06C12.13
F47G9.3	F23H11.6	F25E5.2	T05A7.10	F54H5.2		Y53H1B.1			F49F1.8	T06D4.3
F47H4.7	F23H11.7	F25F2.1	T05B4.1	F55A3.5		Y54E2A.1			F49F1.9	T06D4.4
F47H4.9	F23H12.4	F25F6.1	T05B4.4	F55A4.3		Y54G11A.14			F49H12.3	T06E4.6
F48A11.2	F23H12.6	F25G6.6	T05B9.2	F55C10.5		Y54G2A.5			F49H12.5	T06E6.13
F48B9.5	F23H12.9	F25G6.7	T05C1.1	F55C12.4		Y54G9A.9			F52C6.5	T06E6.2
F48C1.1	F25A2.1	F25H2.1	T05C1.2	F55C12.6		Y55B1AL.2			F52C6.6	T06E6.5
F48C1.7	F25B3.4	F25H5.7	T05C1.3	F55C12.7		Y55F3C.4			F52D1.1	T06G6.4
F48C5.2	F25C8.1	F25H8.3	T05E11.7	F55C5.10		Y56A3A.18			F52D10.6	T07A9.9
F48F5.4	F25C8.5	F25H8.6	T05G5.11	F55C5.11		Y56A3A.33			F52D2.8	T07C4.10
F48F7.5	F25D1.2	F25H9.3	T05G5.12	F55C5.2		Y57A10A.26			F52D2.9	T07D1.3
F48F7.7	F25D1.3	F26A1.8	T06E4.10	F55C9.1		Y57A10B.2			F52E1.4	T07D10.1
F48G7.13	F25D1.4	F26A1.9	T06E4.9	F55D12.6		Y57G11C.499			F52E10.5	T07D10.2
F49A5.2	F25D1.5	F26A10.2	T06F4.3	F55F1.2		Y57G11C.5			F52E4.4	T07D3.7
F49A5.4	F25E2.1	F26A3.5	T06G6.3	F55G1.12		Y57G11C.52			F52F10.4	T07D4.1
F49A5.5	F25E5.10	F26A3.6	T06G6.8	F55G1.13		Y57G7A.8			F52H2.4	T07G12.3
F49C12.6	F25E5.2	F26B1.4	T07A5.5	F55G1.15		Y58G8A.5			F52H2.5	T07G12.5
F49C12.7	F25E5.7	F26D10.10	T07C4.5	F55G11.2		Y59H11AM.1			F52H2.6	T07H6.3
F49E11.4	F25F2.1	F26D2.10	T07D1.3	F55H12.2		Y5F2A.2			F53A9.5	T07H8.6
F49E12.12	F25F6.1	F26D2.3	T07D1.5	F55H12.6		Y60A3A.15			F53B1.3	T08A9.4
F49E12.2	F25G6.6	F26E4.7	T07D10.1	F56B3.1		Y60C6A.1			F53B1.4	T08A9.5
F49E12.9	F25H5.7	F26F12.4	T07G12.5	F56B3.10		Y62E10A.1			F53B3.3	T08A9.6
F49F1.1	F25H8.3	F26F2.4	T07H3.2	F56C3.8		Y62H9A.13			F53B3.6	T08B2.2
F49F1.10	F25H8.6	F26F4.2	T07H3.3	F56C3.9		Y63D3A.11			F53C11.1	T08B6.4
F49F1.5	F25H9.1	F26F4.3	T08A9.10	F56C4.4		Y63D3A.2			F53C11.6	T08B6.7
F49F1.6	F25H9.3	F26G1.3	T08A9.11	F56C9.5		Y63D3A.3			F53C3.11	T08D2.1
F49F1.7	F26A1.8	F26G1.5	T08A9.12	F56D2.5		Y63D3A.7			F53C3.12	T08D2.8
F49H12.5	F26A1.9	F26H9.8	T08A9.13	F56D5.2		Y66D12A.14			F53F1.11	T08E11.1
F49H12.6	F26A3.5	F27B3.2	T08A9.2	F56D5.5		Y66D12A.22			F53F1.4	T08E11.6
F49H6.13	F26A3.6	F27C1.3	T08B6.1	F56D6.1		Y68A4A.13			F53G12.7	T08G11.3
F52B11.3	F26B1.4	F27C1.8	T08B6.6	F56D6.12		Y69A2AL.1			F53G12.9	T08H4.1
F52D1.1	F26B1.8	F27C8.5	T08B6.7	F56D6.13		Y69A2AR.3			F54A5.3	T08H4.2
F52D1.3	F26C11.3	F27E5.4	T08E11.1	F56D6.15		Y71F9AL.2			F54B11.11	T09A12.3
F52D10.5	F26D10.9	F28A12.1	T08E11.8	F56E10.4		Y71F9AL.6			F54B11.7	T09A5.2
F52D2.8	F26D11.10	F28A12.2	T08G3.12	F56F11.1		Y71F9AL.7			F54C1.1	T09B4.5
F52E1.14	F26D2.10	F28B12.2	T08G5.14	F56H1.2		Y71F9AR.4			F54C1.6	T09B4.7
F52E1.7	F26D2.13	F28B4.3	T08G5.15	F56H6.1		Y71F9B.4			F54C1.8	T09E11.5
F52E4.4	F26D2.16	F28D1.9	T08G5.16	F56H6.7		Y71F9B.8			F54D1.4	T09F5.10
F52F10.2	F26D2.3	F28D9.2	T09A12.2	F56H9.4		Y71G12B.14			F54D10.8	T10B10.5
F52F10.3	F26E4.5	F28G4.2	T09B4.6	F57A8.8		Y71H2AL.2			F54D10.9	T10B10.7
F52F10.4	F26F12.4	F28G4.4	T09D3.4	F57B1.6		Y71H2B.4			F54D11.1	T10B5.2
F52H2.3	F26F12.6	F28H7.8	T10B10.9	F57B10.14		Y73B3A.18			F54D5.12	T10B5.4
F52H2.6	F26F2.1	F28H7.9	T10B9.10	F57C2.4		Y73B6BL.12			F54E2.1	T10B5.5
F53B1.4	F26F2.6	F29B9.9	T10B9.3	F57E7.1		Y73B6BL.34			F54E2.3	T10B9.1
F53B1.6	F26F4.2	F29C12.1	T10B9.5	F57F4.1		Y73B6BL.42			F54E4.2	T10C6.11
F53B2.8	F26G1.6	F29D11.1	T10B9.8	F57F4.4		Y73C8B.5			F54E4.4	T10C6.13
F53B3.6	F26G1.7	F29F11.2	T10C6.11	F58A3.4		Y73C8C.2			F54E7.1	T10C6.14
F53C11.1	F27B3.2	F29G6.1	T10C6.12	F58A3.5		Y73F4A.2			F54F2.1	T10C6.6
F53C3.1	F27C1.1	F29G6.3	T10C6.14	F58A4.1		Y73F4A.3			F54F3.1	T10D4.5
F53C3.12	F27C1.11	F29G9.5	T10E10.6	F58A4.14		Y75B7AR.1			F54F7.2	T10E10.2
F53E10.4	F27C1.3	F29G9.6	T10E9.8	F58A6.4		Y75B8A.23			F54F7.7	T10E10.4
F53E10.5	F27C8.1	F30A10.2	T11A5.7	F58A6.8		Y75B8A.34			F55A11.6	T10E10.5
F53F1.1	F27C8.2	F30B5.1	T12A7.3	F58A6.9		Y77E11A.10			F55A12.2	T11A5.1
F53F1.4	F27C8.5	F30H5.3	T12A7.7	F58B3.3		Y77E11A.14			F55A4.2	T11F1.1
F53F1.5	F27E5.3	F31A9.3	T12D8.10	F58D5.6		Y77E11A.6			F55B11.1	T11F9.2
F53F8.1	F27E5.4	F31B12.3	T12D8.5	F58E1.5		Y7A9D.1			F55B11.7	T12A2.16
F53F8.2	F28A12.1	F31D4.4	T13A10.12	F58E10.2		Y80D3A.10			F55B12.1	T12C9.1
F53H2.1	F28A12.4	F31D5.4	T13F2.12	F58E6.7		Y80D3A.7			F55C5.6	T12C9.3
F53H4.3	F28B4.3	F31D5.5	T14E8.4	F58F12.3		Y82E9BL.5			F55C5.9	T12D8.1
F54A5.3	F28D1.3	F31E8.5	T14F9.5	F58F12.4		Y82E9BR.1			F55C9.6	T12D8.2
F54B11.11	F28D1.5	F31F4.11	T15H9.3	F58F9.3		Y82E9BR.17			F55D10.1	T13F2.12
F54B11.2	F28D1.8	F31F4.7	T15H9.5	F58F9.4		Y82E9BR.3			F55D10.5	T13F2.8
F54B11.9	F28E10.1	F31F6.1	T17A3.10	F58F9.7		Y82E9BR.6			F55F3.3	T13F3.1
F54D1.1	F28E10.4	F31F6.5	T17A3.12	F58F9.9		Y87G2A.12			F55F3.4	T13F3.7
F54D10.4	F28G4.2	F31F7.2	T18D3.2	F58G6.3		Y87G2A.16			F55G11.2	T13G4.1
F54D11.1	F28G4.3	F32A5.8	T19B10.11	F58G6.7		Y87G2A.19			F55G11.9	T14B1.2
F54D5.3	F28G4.4	F32A7.5	T19B10.2	F58H1.6		Y8G1A.1			F55H12.6	T16A1.1
F54D5.4	F28G4.5	F32B4.8	T19B10.3	F59A1.10		Y94H6A.12			F56A11.7	T16A1.2
F54E2.1	F28H7.10	F32B5.1	T19C3.9	F59A6.10		Y95B8A.4			F56A12.2	T16A9.3
F54E4.4	F28H7.11	F32B5.2	T19C4.1	F59A6.12		Y97E10AL.1			F56A6.1	T16G1.8
F54F11.2	F28H7.9	F32B6.10	T19C4.2	F59A6.6		Y9C9A.1			F56B3.10	T16G12.3
F54F3.1	F29C12.1	F32B6.4	T19C4.7	F59A7.5		Y9D1A.1			F56B6.4	T17A3.9
F54F3.3	F29C12.5	F32B6.5	T19D7.6	F59B2.11		ZC116.3			F56B6.5	T18D3.2
F54F7.2	F29C6.1	F32D8.1	T19H12.11	F59B8.1		ZC132.4			F56C3.2	T18D3.6
F54F7.4	F29D11.1	F32D8.2	T19H12.4	F59C6.11		ZC15.8			F56C3.6	T19C3.6
F54F7.8	F29F11.5	F32D8.3	T19H12.6	F59C6.14		ZC204.13			F56C4.1	T19C9.8
F54H12.8	F29G9.6	F32E10.3	T19H5.2	F59E11.12		ZC21.10			F56C4.3	T19D2.1
F54H5.2	F30A10.8	F32E10.7	T20B3.13	F59E11.2		ZC21.3			F56D2.4	T19H12.1
F54H5.4	F30B5.8	F32H2.5	T20B3.15	F59E11.5		ZC334.1			F56D5.3	T19H12.2
F54H5.5	F30H5.3	F32H2.8	T20C4.1	F59E12.5		ZC334.10			F56D5.9	T19H12.4
F55A11.5	F31B12.3	F32H5.7	T20C7.2	F59F3.5		ZC334.9			F56E3.4	T19H12.8
F55A12.9	F31D4.6	F33A8.10	T20D3.1	F59F3.6		ZC373.2			F56F10.2	T19H5.1
F55B12.2	F31E3.2	F33A8.7	T20D4.11	F59F5.2		ZC395.5			F56F11.1	T20B3.7
F55B12.9	F31E8.2	F33C8.1	T20D4.15	F59H6.12		ZC412.6			F56F3.2	T20D4.7
F55C5.9	F31E8.5	F33D11.3	T20D4.16	H02F09.3		ZC455.1			F56F4.6	T20G5.5
F55D12.4	F31F4.11	F33D11.4	T20D4.7	H04M03.12		ZC84.7			F56H1.3	T20H12.1
F55E10.6	F31F4.18	F33D11.5	T21B4.9	H04M03.2		ZK1010.1			F56H11.1	T20H9.4
F55F3.2	F31F4.7	F33D11.7	T21C9.8	H05L03.3		ZK1010.4			F56H11.2	T21B6.1
F55F3.3	F31F6.1	F33D4.6	T21D12.5	H05L14.1		ZK1067.7			F56H11.4	T21C12.1
F55F3.4	F31F6.6	F33E2.10	T21E12.5	H06H21.10		ZK112.5			F56H6.1	T21C9.7
F55F8.1	F31F7.1	F33E2.2	T21E3.2	H06I04.7		ZK1225.6			F56H9.6	T21D12.5
F55F8.8	F31F7.2	F33H1.5	T22B11.3	H10E21.1		ZK1236.9			F57A8.4	T21D9.1
F55G1.12	F32A11.3	F33H12.2	T22B7.3	H12C20.3		ZK1248.2			F57B1.3	T21E12.3
F55G1.15	F32A11.7	F33H12.4	T22C1.12	H12C20.6		ZK1251.11			F57B1.4	T21E3.1
F55G11.1	F32A5.4	F33H12.5	T22C8.5	H12D21.9		ZK1320.5			F57B1.6	T21E8.7
F55G11.2	F32A6.5	F33H2.8	T22E5.3	H12I13.5		ZK177.9			F57C7.4	T21F2.1
F55G11.4	F32B4.1	F34D10.6	T22F3.11	H12I13.6		ZK265.4			F57F10.1	T21H3.1
F55G11.5	F32B4.2	F35A5.3	T22F3.12	H14A12.6		ZK287.8			F57F4.3	T21H8.5
F55G11.7	F32B4.6	F35A5.4	T22F3.5	H14A12.7		ZK455.2			F57F4.4	T22B2.2
F55G11.8	F32B4.8	F35A5.5	T22H2.1	H20E11.1		ZK470.6			F57F5.2	T22D2.1
F55G11.9	F32B5.1	F35B12.2	T22H2.3	H20E11.3		ZK488.7			F57F5.3	T22E5.3
F55H12.3	F32B5.2	F35B12.4	T22H2.4	H20J04.1		ZK512.4			F57G12.1	T22G5.1
F55H2.2	F32B5.3	F35B3.1	T23B12.8	H23L24.5		ZK512.8			F57H12.2	T22H2.1
F56A12.2	F32B5.4	F35B3.4	T23B3.3	H23N18.1		ZK512.9			F58A4.14	T22H9.2
F56A6.1	F32B5.7	F35C5.5	T23B7.1	H23N18.2		ZK520.5			F58A4.5	T22H9.4
F56B6.2	F32B6.10	F35C5.7	T23B7.3	H23N18.3		ZK546.6			F58B3.2	T23B3.4
F56C3.2	F32B6.4	F35C5.9	T23E7.6	H25K10.1		ZK652.1			F58B6.1	T23B5.3
F56C3.9	F32B6.5	F35C8.3	T23F2.3	H31G24.1		ZK652.2			F58D2.1	T23C6.5
F56C9.7	F32D8.1	F35D11.2	T23F2.4	H32K16.2		ZK662.2			F58E1.2	T23D8.2
F56D2.8	F32D8.12	F35D11.7	T24A6.8	H32K21.1		ZK666.6			F58E1.8	T23D8.5
F56D3.1	F32D8.2	F35D2.1	T24C12.1	H37A05.2		ZK666.7			F58E6.11	T23D8.9
F56D6.14	F32E10.7	F35D2.2	T24D5.1	H38K22.6		ZK673.1			F58F6.2	T23F4.3
F56D6.2	F32G8.6	F35E12.10	T24D5.4	H38K22.7		ZK697.8			F58F9.3	T23F4.4
F56E10.3	F32H2.7	F35E12.2	T24D8.4	H43E16.1		ZK75.1			F58G1.4	T23H2.4
F56F10.1	F32H2.9	F35E12.3	T24F1.7	K01A2.8		ZK75.2			F58G1.5	T24A6.19
F56F4.8	F32H5.4	F35E12.4	T25B6.3	K01B6.4		ZK75.3			F58G1.6	T24C4.2
F56H1.1	F32H5.7	F35E12.5	T25B9.11	K01C8.8		ZK792.4			F58G1.8	T24C4.8
F56H1.2	F33A8.2	F35E12.7	T25E12.9	K01D12.11		ZK813.2			F58G11.4	T24E12.2
F57B1.3	F33C8.2	F35E12.8	T26E3.7	K01D12.15		ZK863.5			F58G4.1	T24F1.3
F57B10.11	F33D11.2	F35E12.9	T26H2.5	K01D12.7		ZK896.8			F58G6.3	T25D1.1
F57B7.2	F33D11.3	F35E2.9	T26H2.6	K01D12.8		ZK909.4			F58G6.4	T25D1.3
F57B7.3	F33D11.4	F35E8.11	T26H5.10	K01G5.8		ZK909.5			F58G6.7	T25D10.3
F57B9.9	F33D11.5	F35E8.8	T26H5.3	K02A11.4		ZK930.4			F58G6.9	T25D10.5
F57C12.1	F33D11.7	F35F10.4	T26H5.4	K02A2.5		ZK930.6			F58H1.2	T25E12.10
F57C12.3	F33D4.3	F35F10.7	T26H5.5	K02B12.9		ZK970.8			F58H7.1	T25E12.4
F57F4.1	F33D4.6	F35G12.12	T26H5.9	K02D7.3					F58H7.3	T25E12.7
F57F4.3	F33H1.5	F35G2.1	T27A1.7	K02E11.10					F58H7.7	T25E4.2
F57F4.4	F33H12.4	F35H10.10	T27B7.2	K02E11.3					F59A1.10	T26C12.3
F57F5.1	F34D10.6	F35H10.3	T27B7.7	K02E11.4					F59A1.11	T26H5.8
F57F5.2	F34D6.4	F35H8.1	T27C10.2	K02E11.5					F59A1.13	T27A3.4
F57G12.2	F35A5.2	F36A2.3	T27C10.7	K02E11.6					F59A6.11	T27A8.5
F57G8.5	F35A5.3	F36A4.10	T27C5.5	K02E11.7					F59A7.1	T27B7.7
F57H12.6	F35A5.4	F36A4.6	T27E4.7	K02E2.7					F59B1.4	T27C4.4
F58A4.1	F35A5.5	F36D3.4	T28A11.2	K02E2.8					F59B2.12	T27E7.6
F58A4.11	F35B12.3	F36D3.5	T28A11.7	K02E7.11					F59B8.1	T27F6.4
F58A6.2	F35B12.4	F36D3.9	T28A8.2	K02F3.8					F59C12.1	T27F6.8
F58A6.4	F35B12.6	F36D4.1	T28C12.1	K02G10.3					F59D12.3	T27F7.2
F58A6.5	F35C12.2	F36D4.3	T28C6.1	K03A1.4					F59D8.1	T28A11.15
F58A6.9	F35C5.10	F36D4.4	T28D9.12	K03B8.11					F59D8.2	T28A11.6
F58B3.1	F35C5.7	F36D4.5	T28F2.1	K03B8.8					F59E12.12	T28A8.2
F58B3.3	F35C8.3	F36F12.3	T28F4.5	K03B8.9					F59E12.8	T28B8.1
F58B4.1	F35D11.10	F36G3.1	T28F4.6	K03D3.2					F59F3.5	T28D6.4
F58B4.2	F35D11.2	F36G9.13	T28H10.4	K03D3.5					F59F5.1	T28D6.5
F58B4.5	F35D11.7	F36H1.3	VK10D6R.1	K03D7.8					F59F5.5	T28D9.12
F58B6.1	F35D11.8	F36H1.4	VW02B12L.2	K03E6.6					F59G1.2	T28D9.2
F58E1.5	F35D2.1	F36H12.2	W01A8.7	K03H1.12					F59G1.4	T28F2.3
F58E6.4	F35D2.4	F36H5.10	W01B11.1	K03H1.4					H01M10.2	VF13D12L.1
F58F9.4	F35D2.5	F36H5.3	W01C8.1	K04C1.4					H02F09.3	VH15N14R.1
F58F9.8	F35E12.2	F36H5.5	W01C9.2	K04C2.5					H03E18.1	VW02B12L.2
F58G1.4	F35E2.6	F36H9.5	W01C9.5	K04C2.7					H03G16.4	VY10G11R.1
F58G1.5	F35E2.9	F37A4.4	W01F3.2	K04C2.8					H04M03.11	VZK822L.1
F58G6.3	F35E8.11	F37B1.2	W02A2.9	K04D7.6					H04M03.4	W01A8.3
F58G6.7	F35F10.4	F37B1.3	W02B3.7	K04F1.9					H05C05.3	W01H2.3
F58G6.9	F35F10.7	F37B1.5	W02D3.6	K04G2.9					H09I01.1	W02A11.3
F58H1.4	F35G12.6	F37B1.8	W02D3.7	K05B2.4					H12C20.3	W02A11.8
F58H1.6	F35G8.1	F37B12.1	W02D7.11	K05C4.10					H12I13.2	W02B12.3
F59A1.10	F35H10.2	F37B4.7	W02D7.8	K05F1.10					H14N18.1	W02B3.4
F59A1.8	F35H10.3	F37C4.1	W03C9.5	K05F1.7					H17B01.2	W02B3.6
F59A3.8	F35H8.1	F37E3.3	W03D2.10	K05F1.8					H18N23.2	W02B3.7
F59A6.4	F36A2.11	F37H8.4	W03D2.2	K05F1.9					H19J13.1	W02C12.3
F59B1.8	F36D3.4	F38A1.15	W03D2.9	K05F6.5					H19M22.2	W02D7.9
F59B10.1	F36D3.5	F38A1.9	W03D8.3	K06A4.5					H20E11.2	W02F12.7
F59B10.5	F36D4.1	F38A3.1	W03F8.6	K06A4.7					H22K11.3	W02G9.2
F59C6.6	F36D4.4	F38A3.2	W03F9.4	K06A5.3					H23N18.1	W02H5.1
F59C6.8	F36F12.1	F38A5.3	W03G9.5	K06A9.1					H23N18.3	W02H5.8
F59D12.3	F36F12.6	F38B2.2	W03G9.7	K06A9.3					H25K10.1	W03A3.1
F59D8.1	F36F2.5	F38B6.1	W03G9.8	K06C4.17					H25K10.6	W03B1.8
F59D8.2	F36G9.5	F38B6.2	W04A8.2	K06C4.6					H28G03.1	W03D2.4
F59E11.12	F36G9.9	F38B6.3	W04E12.1	K06H7.2					H31G24.1	W03D8.1
F59E11.2	F36H1.12	F38B6.5	W04G3.11	K07A1.4					H35N09.1	W03F11.6
F59E12.4	F36H1.3	F38B6.7	W04G5.9	K07A1.6					H38K22.5	W03F9.3
F59F3.5	F36H1.5	F38E11.12	W04H10.1	K07C11.5					H39E23.2	W03F9.4
F59F4.4	F36H1.9	F38E11.4	W05B10.4	K07C5.2					H40L08.3	W03G1.5
F59F5.1	F36H12.2	F38H4.2	W05B2.2	K07C5.5					H41C03.3	W03G1.7
F59F5.5	F36H5.1	F38H4.4	W05E10.5	K07C5.9					H42K12.3	W03G11.4
F59F5.7	F36H5.10	F39B3.2	W05G11.5	K07D4.4					H43E16.1	W03G9.3
H01G02.2	F36H5.2	F39C12.3	W05H5.7	K07E12.2					JC8.12	W03G9.5
H02F09.2	F36H9.1	F39D8.1	W05H7.4	K07E8.6					K01A12.3	W03H9.1
H02F09.3	F37A4.4	F39D8.2	W06A11.1	K07F5.1					K01A2.1	W03H9.3
H03A11.2	F37A4.5	F39D8.3	W06A7.5	K07F5.5					K01A2.11	W04E12.1
H03E18.1	F37A8.2	F39D8.4	W06G6.10	K07H8.12					K01A6.6	W04E12.2
H03G16.2	F37B1.3	F39E9.1	W06G6.11	K07H8.7					K01D12.12	W04G3.7
H04M03.1	F37B1.8	F39G3.2	W07A8.5	K08B4.3					K01D12.13	W05B10.3
H04M03.4	F37B12.1	F39G3.4	W07B8.4	K08B4.7					K01D12.4	W05B2.2
H06H21.8	F37B4.13	F39G3.5	W07G1.6	K08C7.7					K01H12.3	W05B2.4
H10E21.4	F37B4.7	F39G3.6	W08A12.2	K08D12.5					K02A11.2	W05B5.2
H12C20.3	F37C4.2	F40B5.2	W08A12.4	K08D8.1					K02A2.1	W05F2.2
H12D21.6	F37C4.8	F40D4.12	W08E12.3	K08D8.3					K02A4.1	W05G11.6
H12D21.7	F37E3.3	F40E10.4	W08F4.10	K08D8.4					K02B7.4	W05H5.7
H12D21.9	F37H8.4	F40E10.5	W08F4.11	K08D8.5					K02D7.3	W05H7.4
H17B01.3	F38A1.10	F40F12.3	W08F4.7	K08D8.6					K02D7.4	W06B11.4
H19J13.1	F38A1.4	F40F12.4	W09C5.9	K08E7.4					K02E10.4	W06F12.3
H19M22.3	F38A1.5	F40F4.6	W09D12.1	K08E7.7					K02E11.10	W06H12.1
H20E11.1	F38A1.7	F40F8.7	W09G12.7	K08E7.8					K02E2.8	W06H8.6
H20E11.2	F38A1.9	F40F9.1	W09G3.1	K08F4.12					K02F6.4	W07A12.8
H20E11.3	F38B2.2	F40F9.3	W09H1.3	K08F4.4					K02G10.5	W07A8.5
H20J04.9	F38B6.1	F40G12.10	W10G11.1	K08H10.6					K02G10.6	W07B3.2
H22K11.1	F38B6.2	F40G12.4	W10G11.2	K08H2.5					K02G10.7	W07B8.4
H23L24.4	F38B6.3	F40G12.6	Y102A5B.2	K09B3.1					K03A1.5	W07G1.1
H25K10.1	F38E11.12	F40G12.9	Y102A5C.36	K09C4.7					K03A1.6	W07G1.6
H25K10.4	F38E11.4	F40H6.6	Y104H12D.4	K09C8.2					K03A11.4	W08A12.3
H25P06.4	F38E11.9	F40H7.12	Y105C5A.13	K09C8.6					K03B8.2	W08D2.6
H34I24.2	F38G1.1	F41A4.1	Y105C5B.16	K09D9.1					K03B8.3	W08E12.3
H37A05.2	F38H4.3	F41B5.2	Y105C5B.8	K09D9.2					K03D3.2	W08E12.6
H41C03.3	F38H4.4	F41B5.3	Y105E8B.6	K09E10.1					K03H9.2	W08E3.2
H42K12.3	F39C12.4	F41B5.7	Y106G6G.3	K09G1.2					K04A8.1	W08F4.3
H43E16.1	F39D8.1	F41B5.8	Y10G11A.2	K09H11.10					K04A8.4	W08F4.8
JC8.12	F39D8.2	F41C3.11	Y110A2AL.6	K09H11.6					K04D7.6	W08G11.1
K01A2.11	F39D8.4	F41C6.1	Y110A7A.20	K09H9.1					K04E7.2	W09B6.1
K01B6.1	F39E9.12	F41C6.5	Y111B2A.2	K09H9.8					K04F1.3	W09B6.5
K01D12.11	F39G3.2	F41D3.2	Y113G7A.11	K10B2.2					K04G11.3	W09C3.8
K01D12.12	F39G3.5	F41D3.6	Y116A8B.5	K10B2.3					K04G2.9	W09G10.3
K01D12.13	F39G3.6	F41D3.7	Y116A8C.25	K10B3.1					K04H4.2	W09G12.9
K01F9.2	F40A3.7	F41D9.2	Y116A8C.29	K10B3.9					K04H8.3	W09H1.1
K02A2.5	F40D4.12	F41D9.3	Y116A8C.5	K10C2.5					K05B2.5	W09H1.3
K02A4.1	F40E10.4	F41D9.5	Y116F11B.13	K10C2.7					K05F1.1	W09H1.6
K02B12.9	F40E12.1	F41E6.11	Y116F11B.8	K10C3.3					K05F6.11	W10C6.2
K02C4.2	F40E12.2	F41E6.14	Y119C1B.11	K10C8.4					K05F6.9	W10C8.1
K02D3.2	F40E3.6	F41E6.8	Y119D3A.4	K10D11.1					K05G3.1	W10C8.2
K02D7.3	F40F12.3	F41E7.1	Y17G9B.2	K10D11.5					K06A4.1	W10G11.1
K02D7.4	F40F12.4	F41E7.3	Y18D10A.16	K10D11.7					K06A4.4	W10G11.2
K02E10.4	F40F8.8	F41F3.3	Y18D10A.2	K10D2.4					K06A4.5	Y102A5B.1
K02E11.1	F40F9.1	F41F3.8	Y18H1A.14	K10D2.7					K06A9.1	Y102A5B.2
K02E11.10	F40F9.3	F41G3.17	Y19D2B.2	K10D3.6					K06C4.17	Y102E9.6
K02E11.4	F40G12.10	F41G3.2	Y1H11.1	K10G4.3					K06C4.6	Y104H12D.3
K02E11.5	F40G12.4	F41G3.3	Y22D7AL.16	K10H10.10					K07A1.7	Y105C5A.13
K02E7.1	F40G12.6	F41G4.5	Y22D7AR.5	K11G9.1					K07A3.1	Y105C5B.12
K02F6.1	F40H6.6	F41G4.7	Y22F5A.6	K11H12.3					K07B1.1	Y105C5B.28
K02G10.3	F41B4.2	F41H10.7	Y24D9A.5	K11H12.4					K07C11.10	Y105C5B.6
K03A1.5	F41B5.4	F42A10.7	Y24D9A.7	K11H3.3					K07C11.8	Y105C5B.7
K03B8.2	F41B5.7	F42A8.1	Y25C1A.10	K11H3.5					K07C6.4	Y105E8A.7
K03H1.13	F41C3.11	F42A9.4	Y32B12A.3	K11H3.6					K07D4.6	Y105E8B.1
K03H6.1	F41D3.1	F42A9.7	Y32B12A.4	K11H3.7					K07D8.1	Y106G6G.1
K03H9.2	F41D3.11	F42C5.10	Y32G9A.10	K12C11.5					K07E12.1	Y106G6G.6
K04A8.1	F41D3.2	F42C5.3	Y32G9A.11	K12C11.6					K07E8.3	Y108G3AL.7
K04A8.5	F41D3.6	F42D1.2	Y32H12A.1	K12D12.4					K07E8.9	Y110A2AL.2
K04A8.6	F41D9.2	F42E11.3	Y34D9A.8	K12G11.1					K07G5.3	Y110A2AM.1
K04D7.3	F41D9.3	F42G2.4	Y34F4.1	K12H4.5					K07H8.5	Y110A2AR.3
K04E7.1	F41D9.5	F42G8.8	Y34F4.3	K12H4.6					K08B12.1	Y111B2A.12
K04F1.7	F41E6.11	F42G9.8	Y37A1B.4	K12H6.4					K08B4.2	Y111B2A.18
K04F1.8	F41E6.14	F42H10.5	Y37F4.8	K12H6.8					K08C7.3	Y111B2A.22
K04F1.9	F41E6.8	F43C1.1	Y38C1AA.9	K12H6.9					K08C7.7	Y111B2A.27
K04G11.3	F41E7.1	F43C1.5	Y38E10A.11	M01A12.3					K08C9.6	Y111B2A.9
K04G2.7	F41E7.3	F43C1.7	Y38E10A.15	M01B2.6					K08D12.6	Y113G7A.11
K04H4.6	F41E7.9	F43C11.8	Y38E10A.18	M01D1.1					K08D8.3	Y113G7A.12
K04H8.3	F41G3.10	F43D9.1	Y38E10A.20	M01F1.6					K08D8.4	Y113G7A.5
K05B2.4	F41G3.12	F43E2.4	Y38E10A.25	M02A10.1					K08D8.6	Y113G7B.1
K05B2.5	F41G3.2	F43E2.8	Y38F2AL.5	M02B1.4					K08D9.1	Y113G7B.15
K05F1.9	F41G3.3	F43G6.6	Y38H6C.18	M02H5.1					K08E5.2	Y113G7B.17
K05G3.3	F41G3.4	F43G9.6	Y38H6C.7	M02H5.4					K08E5.3	Y116A8A.4
K06A1.2	F41G4.4	F43G9.8	Y38H8A.5	M02H5.8					K08E7.5	Y116A8A.6
K06A4.1	F41G4.5	F43H9.2	Y39A1C.1	M02H5.9					K08E7.9	Y116A8B.1
K06A4.4	F41G4.7	F44A2.2	Y39A3CL.3	M03A8.3					K08F4.11	Y116A8C.14
K06A4.5	F41H10.7	F44B9.1	Y39A3CR.8	M03B6.1					K08F4.4	Y116A8C.5
K06B4.8	F41H10.8	F44B9.10	Y39B6A.23	M03D4.1					K08F4.7	Y116F11B.1
K06B9.1	F42A10.7	F44C4.3	Y39B6A.5	M04B2.5					K08F8.4	Y116F11B.9
K06B9.2	F42A9.7	F44C8.7	Y39E4B.4	M04C3.1					K08F8.7	Y119D3B.14
K06C4.17	F42A9.9	F44D12.4	Y39G10AR.16	M04C9.3					K08H10.6	Y119D3B.8
K06C4.9	F42C5.2	F44D12.5	Y39G10AR.20	M04C9.4					K08H2.1	Y11D7A.4
K06G5.1	F42D1.2	F44E2.2	Y40B10A.3	M04D8.1					K09A11.2	Y11D7A.8
K07A1.10	F42D1.3	F44E2.4	Y40B10A.6	M04D8.2					K09A9.3	Y13C8A.2
K07B1.4	F42E11.3	F44E5.2	Y40H7A.1	M04D8.3					K09A9.6	Y15E3A.2
K07C5.7	F42F12.2	F44E7.7	Y40H7A.4	M04D8.7					K09B11.10	Y17D7A.4
K07C6.3	F42G2.2	F44E7.8	Y41D4B.15	M05B5.6					K09C4.5	Y17D7C.6
K07C6.4	F42G2.3	F44F4.11	Y41D4B.20	M106.7					K09C6.1	Y17G7B.17
K07E3.7	F42G2.4	F44F4.4	Y41D4B.26	M110.9					K09C8.5	Y17G7B.21
K07E8.3	F42G2.7	F44F4.6	Y41D4B.5	M117.6					K09E10.2	Y17G7B.6
K07E8.5	F42G9.8	F44G3.10	Y41E3.12	M151.6					K09F5.1	Y18D10A.4
K07H8.5	F43C11.5	F44G3.14	Y41G9A.10	M153.2					K09F5.2	Y18D10A.7
K07H8.6	F43C11.8	F44G3.7	Y41G9A.5	M162.7					K09F6.10	Y18H1A.13
K08B12.1	F43D2.4	F44G4.5	Y43C5A.3	M163.8					K09F6.5	Y18H1A.3
K08B4.3	F43D9.1	F45B8.3	Y43D4A.6	M163.9					K09G1.1	Y19D10B.2
K08C9.4	F43E2.5	F45E1.5	Y43F4A.3	M176.10					K09G1.4	Y20F4.8
K08D8.1	F43G6.6	F45E10.1	Y43F4A.4	M176.6					K09H9.3	Y22D7AL.1
K08D8.3	F43G9.6	F45E10.2	Y43F8A.1	M176.8					K10B2.2	Y22D7AL.6
K08D8.4	F43H9.2	F45E4.6	Y43F8B.13	M18.2					K10B4.1	Y22D7AL.7
K08D8.5	F43H9.4	F45E4.7	Y43F8C.1	M199.9					K10B4.4	Y22D7AR.5
K08D8.6	F44A2.2	F45E6.4	Y43F8C.9	M28.4					K10B4.5	Y22D7AR.7
K08E5.3	F44A2.4	F45F2.6	Y44A6B.1	M28.8					K10C2.1	Y23H5A.1
K08E7.5	F44B9.1	F45G2.1	Y44E3A.3	M7.10					K10C2.4	Y23H5A.4
K08E7.7	F44B9.10	F45H7.4	Y44E3B.2	M7.12					K10C9.9	Y23H5A.8
K08E7.9	F44C4.3	F46A8.5	Y45F10B.15	M7.9					K10D11.1	Y23H5B.2
K08F4.7	F44C8.7	F46A9.2	Y45F10B.3	M88.1					K10D11.5	Y23H5B.7
K08F8.3	F44D12.2	F46A9.3	Y45F10C.6	R01B10.3					K10D11.6	Y24D9B.1
K08F8.4	F44D12.4	F46B3.1	Y45F10D.6	R01H2.7					K10D3.1	Y24F12A.3
K08F8.5	F44D12.5	F46B3.5	Y45G5AL.2	R01H2.8					K10D6.3	Y24F12A.4
K08F8.7	F44D12.8	F46B6.2	Y46B2A.3	R02D5.9					K10F12.7	Y27F2A.5
K08H10.6	F44D12.9	F46B6.9	Y46C8AR.1	R02E4.1					K10G4.3	Y2C2A.1
K08H10.9	F44E2.4	F46C3.3	Y46E12A.1	R02E4.3					K10G4.4	Y2H9A.3
K09A11.3	F44E5.2	F46C5.3	Y46E12BR.1	R02F2.6					K10G6.1	Y32G9A.11
K09B11.10	F44E7.2	F46C8.2	Y46G5A.26	R03A10.1					K10G6.2	Y32G9A.12
K09B3.1	F44E7.7	F46C8.6	Y46H3A.4	R03H10.4					K10H10.10	Y34D9A.4
K09C4.5	F44F4.13	F46C8.8	Y46H3A.5	R04A9.1					K10H10.2	Y35H6.3
K09C6.7	F44F4.5	F46F11.3	Y46H3D.1	R04B5.1					K10H10.4	Y37A1A.4
K09C8.1	F44F4.6	F46F5.7	Y47D3A.32	R04B5.11					K11C4.2	Y37A1B.1
K09C8.4	F44F4.7	F46G10.3	Y47H10A.3	R04B5.6					K11C4.5	Y37A1B.13
K09D9.13	F44G3.10	F46G10.4	Y48A6B.8	R04D3.1					K11G12.2	Y37A1B.15
K09D9.2	F44G3.2	F46G11.1	Y48C3A.1	R04F11.4					K11G9.1	Y37B11A.1
K09E10.2	F44G3.7	F46G11.2	Y48E1B.15	R04F11.5					K11G9.3	Y37D8A.12
K09E9.1	F44G4.5	F47A4.5	Y48E1B.16	R05A10.2					K11G9.4	Y37D8A.9
K09F5.2	F45B8.3	F47B10.2	Y48E1B.9	R05A10.4					K11H12.4	Y37E11AL.1
K09F6.5	F45D11.1	F47B3.7	Y48G1BL.7	R05C11.1					K11H12.7	Y37E11AL.5
K09G1.4	F45E1.5	F47B8.10	Y48G1C.9	R05C11.4					K12B6.4	Y37E11AR.2
K09H11.1	F45E4.3	F47B8.11	Y48G9A.10	R05D3.12					K12B6.5	Y37E11AR.3
K10B2.2	F45E4.6	F47B8.5	Y48G9A.7	R05F9.12					K12F2.1	Y37E11AR.4
K10C2.1	F45E4.7	F47C10.3	Y49A3A.4	R05F9.13					K12H6.4	Y37E11AR.6
K10C2.3	F45F2.6	F47C10.4	Y49C4A.9	R05G9.2					K12H6.8	Y37E11AR.7
K10C8.2	F45G2.1	F47C10.6	Y49E10.22	R05H5.2					M01A12.3	Y37E11B.4
K10D11.1	F45G2.2	F47C10.8	Y49E10.25	R06C7.3					M01B2.6	Y37E11B.9
K10D11.2	F45H11.6	F47C12.1	Y49F6B.12	R06F6.7					M01D7.7	Y37E3.15
K10D11.3	F46A8.5	F47C12.2	Y49F6B.5	R07A4.2					M01E11.7	Y37E3.5
K10D11.5	F46A8.8	F47C12.4	Y49F6C.7	R07B1.11					M01H9.5	Y37F4.3
K10D11.6	F46A9.2	F47D12.7	Y4C6B.2	R07B1.2					M02B1.2	Y37H9A.2
K10G4.13	F46A9.3	F47E1.2	Y4C6B.4	R07B5.7					M02B7.6	Y37H9A.3
K10G4.3	F46B3.1	F47F6.1	Y50D4A.5	R07B7.11					M02D8.4	Y38C1AA.5
K10G6.2	F46B3.17	F47F6.3	Y50E8A.1	R07B7.15					M02D8.5	Y38C1AA.8
K10H10.2	F46B3.5	F47F6.5	Y50E8A.17	R07B7.6					M02F4.3	Y38C1BA.3
K11D12.10	F46B3.7	F47G6.3	Y50E8A.3	R07C3.13					M02F4.7	Y38C9B.1
K11D12.13	F46B6.11	F47G9.3	Y51A2B.5	R07C3.9					M02F4.8	Y38F1A.4
K11D12.6	F46B6.2	F47H4.11	Y51A2D.11	R07E4.3					M02G9.1	Y38F1A.5
K11D12.7	F46B6.9	F48A11.1	Y51A2D.12	R07E5.17					M02H5.2	Y38H6A.2
K11D12.8	F46C5.3	F48A11.2	Y51B9A.7	R07G3.6					M03A8.4	Y38H6C.14
K11E4.1	F46C5.7	F48A9.3	Y51H4A.5	R07H5.4					M03B6.1	Y38H6C.17
K11G12.1	F46C8.6	F48B9.5	Y52B11B.1	R08A2.5					M03B6.2	Y38H6C.5
K11G9.2	F46C8.8	F48C1.7	Y52E8A.1	R08A2.7					M03E7.4	Y38H6C.7
K11G9.3	F46E10.1	F48C11.1	Y53C12A.2	R08B4.5					M03F4.2	Y38H8A.1
K11H12.10	F46F11.3	F48C5.1	Y53F4A.2	R08C7.8					M03F4.4	Y38H8A.2
K11H12.11	F46F3.1	F48E3.7	Y53F4B.17	R08F11.4					M03F4.7	Y39A1A.15
K11H12.3	F46F5.7	F48E3.8	Y53F4B.37	R09B3.2					M03F8.5	Y39A1A.7
K11H12.4	F46G10.6	F48E3.9	Y53F4B.6	R09D1.10					M03F8.6	Y39A1C.3
K11H12.7	F46G11.1	F48F5.2	Y53G8AR.1	R09E10.5					M04B2.7	Y39A3B.2
K11H3.2	F47B10.8	F48F7.7	Y53H1A.3	R09E10.8					M04C9.1	Y39A3B.4
K12B6.3	F47B3.7	F48G7.13	Y53H1A.4	R09E12.9					M04C9.2	Y39A3CL.2
K12C11.3	F47B7.7	F48G7.5	Y54E2A.9	R09H10.7					M04C9.5	Y39B6A.23
K12H4.7	F47B8.11	F49B2.3	Y54F10BM.7	R09H3.3					M04D8.6	Y39B6A.27
LLC1.2	F47B8.12	F49B2.6	Y54G2A.20	R102.1					M04G7.1	Y39B6A.30
M01E10.2	F47B8.9	F49C12.15	Y54G2A.37	R102.8					M05D6.9	Y39B6A.8
M02B1.1	F47C10.3	F49C12.2	Y54G2A.47	R105.1					M110.2	Y39D8B.3
M02D8.1	F47C10.4	F49C12.3	Y54G2A.8	R10D12.6					M110.8	Y39E4B.6
M02D8.5	F47C10.6	F49C12.6	Y54G9A.10	R10D12.8					M153.2	Y39F10C.1
M02F4.7	F47C10.8	F49C12.7	Y55B1AL.2	R10E11.2					M176.10	Y39G10AR.11
M02H5.11	F47C12.1	F49C12.8	Y55B1AR.3	R10E11.7					M176.6	Y39G10AR.12
M02H5.4	F47C12.2	F49C5.4	Y55B1BR.6	R10F2.5					M18.1	Y39G10AR.13
M02H5.6	F47C12.4	F49D11.2	Y55F3AM.2	R10H10.4					M195.2	Y39G10AR.17
M02H5.7	F47C12.6	F49E10.2	Y55F3BR.4	R11D1.3					M28.1	Y39G10AR.18
M02H5.8	F47D12.1	F49E10.4	Y55F3C.10	R11F4.2					M28.8	Y39G10AR.7
M03A8.1	F47D12.7	F49E11.2	Y57A10A.24	R11G11.6					M79.4	Y39G8C.1
M03B6.1	F47E1.2	F49E12.10	Y57A10A.35	R11G11.7					M88.1	Y39G8C.2
M03B6.3	F47E1.3	F49E12.12	Y57A10C.10	R12B2.7					M88.4	Y39G8C.4
M03E7.4	F47F6.3	F49E12.7	Y57E12AR.1	R12C12.10					R01E6.1	Y39H10A.6
M03F4.6	F47F6.5	F49E12.9	Y57G11C.46	R12C12.7					R01E6.2	Y39H10A.7
M03F8.1	F47G4.5	F49E2.1	Y57G11C.499	R12E2.4					R01E6.4	Y39H10B.1
M04B2.5	F47G4.7	F49E8.3	Y57G11C.52	R13A1.10					R01E6.7	Y40A1A.3
M04C3.2	F47G6.3	F49F1.1	Y57G7A.4	R13A1.5					R01H10.3	Y40B10A.3
M04C7.4	F47H4.11	F49F1.10	Y57G7A.8	R13A5.6					R01H2.5	Y40B10A.6
M04C9.3	F47H4.4	F49F1.6	Y58A7A.2	R13D7.2					R02C2.3	Y40B10A.7
M04C9.4	F47H4.6	F49F1.7	Y59H11AM.1	R13D7.7					R02C2.7	Y40H7A.5
M04D8.6	F47H4.7	F49F1.8	Y59H11AM.4	R13F6.3					R02D1.1	Y41C4A.1
M05D6.4	F48A11.1	F49H12.7	Y5F2A.2	R13F6.5					R02D3.1	Y41D4A.1
M110.1	F48A11.2	F49H6.13	Y5H2B.7	R13H4.7					R02D5.4	Y41D4A.8
M110.8	F48A9.3	F49H6.8	Y60A3A.15	R13H9.4					R02D5.9	Y41E3.10
M110.9	F48B9.5	F52A8.3	Y60A3A.2	R13H9.5					R02E4.1	Y41E3.12
M142.2	F48C1.7	F52B11.3	Y60A9A.1	R151.4					R02F11.1	Y41E3.18
M151.2	F48C11.1	F52B11.4	Y60C6A.1	R17.1					R03A10.6	Y41G9A.1
M151.6	F48C11.2	F52C6.13	Y61B8A.4	R173.4					R03D7.1	Y41G9A.2
M163.11	F48E3.7	F52C9.5	Y62E10A.19	R186.8					R03E1.3	Y41G9A.4
M176.5	F48E3.8	F52D1.1	Y62E10A.3	R31.3					R03E9.1	Y43C5B.2
M195.1	F48F5.2	F52D1.3	Y62H9A.10	R90.3					R03E9.2	Y43D4A.5
M199.5	F48F5.4	F52D10.5	Y64G10A.10	R90.5					R03G8.4	Y43F4A.1
M28.10	F48G7.12	F52D10.6	Y64H9A.1	T01B10.2					R03H10.2	Y43F4A.4
M28.8	F49A5.2	F52D2.8	Y65B4BR.1	T01B11.4					R03H10.4	Y43F8B.12
M28.9	F49A5.4	F52E1.4	Y65B4BR.9	T01B6.1					R03H10.6	Y43F8B.2
M6.1	F49A5.5	F52E1.8	Y67A10A.11	T01B7.9					R03H10.7	Y44A6D.4
M60.5	F49A5.7	F52F10.2	Y67D8C.6	T01C1.4					R03H4.2	Y45G12B.1
M7.10	F49A5.8	F52F10.3	Y68A4A.13	T01C3.2					R04B5.3	Y46B2A.1
M7.12	F49B2.3	F52F10.4	Y69A2AR.27	T01C8.2					R04B5.8	Y46B2A.3
M7.8	F49B2.6	F52G3.3	Y69A2AR.8	T01C8.3					R04B5.9	Y46E12A.1
M7.9	F49C12.15	F52G3.5	Y69F12A.3	T01D1.8					R04D3.6	Y46E12BL.1
M88.1	F49C5.4	F52H3.1	Y69H2.10	T01G6.1					R05A10.6	Y46G5A.1
M88.7	F49D11.4	F53A9.1	Y6E2A.4	T01G6.5					R05C11.1	Y46G5A.18
PDB1.1	F49E10.2	F53A9.2	Y71A12B.6	T01H10.7					R05F9.5	Y46G5A.24
R01H2.5	F49E10.4	F53B1.4	Y71F9AL.6	T02B11.8					R05G6.9	Y46G5A.26
R01H2.7	F49E11.11	F53B1.6	Y71F9AR.4	T02D1.5					R05G9.2	Y46G5A.29
R02D1.1	F49E11.3	F53B1.7	Y71G12B.14	T02D1.7					R05H10.6	Y46G5A.4
R02E4.1	F49E11.4	F53B2.2	Y71G12B.18	T02D1.8					R05H10.7	Y46G5A.42
R03G5.5	F49E12.7	F53B2.3	Y71G12B.7	T02E1.1					R05H11.2	Y46G5A.43
R03G8.3	F49F1.11	F53B2.5	Y73B3A.11	T02G5.1					R06C7.10	Y46H3C.4
R03G8.6	F49F1.6	F53B2.8	Y73B3A.5	T03D3.1					R06C7.6	Y46H3C.5
R03H10.7	F52A8.3	F53B3.3	Y73B3B.2	T03D8.7					R07A4.3	Y47D3A.31
R03H4.6	F52B11.3	F53B3.6	Y73B6A.2	T03F1.11					R07A4.4	Y47D3B.10
R04B3.1	F52C6.13	F53B6.6	Y73B6BL.10	T03F1.12					R07B1.13	Y47D3B.2
R04B3.3	F52C6.14	F53B6.9	Y73B6BL.22	T03F6.10					R07B1.3	Y47D3B.9
R04B5.3	F52C6.5	F53C11.1	Y73B6BL.36	T03F6.8					R07B1.4	Y47G6A.32
R04B5.8	F52D1.3	F53C11.2	Y73F8A.12	T03G11.8					R07B1.5	Y47H10A.1
R04B5.9	F52D10.4	F53C3.1	Y73F8A.31	T04A6.1					R07B7.5	Y47H10A.3
R04D3.1	F52D10.5	F53C3.3	Y75B12B.3	T04A8.5					R07C12.3	Y47H9C.12
R04E5.10	F52D10.6	F53F1.1	Y75B8A.33	T04B2.3					R07C3.10	Y47H9C.6
R04E5.2	F52D2.8	F53F1.4	Y75B8A.34	T04C12.11					R07C3.11	Y47H9C.9
R04F11.5	F52E1.2	F53F1.5	Y76B12C.8	T04C12.3					R07C3.12	Y48A6B.11
R05A10.2	F52E1.4	F53F1.7	Y76B12C.9	T04C12.8					R07C3.13	Y48A6B.6
R05A10.3	F52E1.8	F53F4.4	Y77E11A.14	T04D3.8					R07C3.3	Y48A6C.1
R05C11.1	F52E10.5	F53F4.5	Y79H2A.4	T04F3.4					R07E3.4	Y48B6A.1
R05D3.12	F52F10.2	F53F4.9	Y7A5A.10	T04H1.3					R07E3.6	Y48B6A.3
R05D8.7	F52F10.4	F53F8.1	Y7A5A.6	T04H1.7					R07E4.1	Y48C3A.7
R05F9.12	F52F12.1	F53H4.3	Y80D3A.7	T05A1.3					R07E4.6	Y48C3A.8
R05F9.5	F52F12.9	F54A3.4	Y82E9BL.16	T05A1.5					R07E5.4	Y48D7A.1
R05G6.5	F52G3.3	F54A5.3	Y82E9BR.11	T05A10.3					R07E5.5	Y48E1A.1
R05H10.6	F52G3.5	F54B11.2	Y82E9BR.21	T05A10.5					R07G3.6	Y48E1B.10
R05H11.2	F52H3.6	F54B11.7	Y82E9BR.23	T05A7.5					R08A2.5	Y48E1B.12
R05H5.6	F53A9.3	F54B11.8	Y82E9BR.3	T05B11.4					R08B4.1	Y48E1B.13
R06B10.3	F53B1.3	F54B11.9	Y82E9BR.6	T05B11.6					R08D7.7	Y48G1BL.4
R06B10.7	F53B1.4	F54B8.2	Y87G2A.12	T05C1.2					R08E3.1	Y48G1BL.6
R06B9.2	F53B1.7	F54B8.3	Y87G2A.15	T05C12.1					R08E3.2	Y48G1BL.7
R07A4.4	F53B2.3	F54C8.1	Y87G2A.20	T05C12.3					R08E5.3	Y48G1BM.1
R07B1.10	F53B2.5	F54D1.1	Y92C3B.1	T05C12.8					R08F11.6	Y48G1BM.6
R07B1.11	F53B3.3	F54D1.6	Y94H6A.12	T05C3.7					R09A1.3	Y48G1C.8
R07B1.12	F53B3.6	F54D10.4	Y94H6A.2	T05E12.6					R09A8.3	Y48G9A.10
R07B1.13	F53B6.2	F54D10.9	Y94H6A.6	T05E8.2					R09D1.6	Y48G9A.12
R07B1.2	F53B6.4	F54D12.1	Y95B8A.2	T05F1.5					R09E10.5	Y48G9A.3
R07B1.3	F53B6.6	F54D12.2	Y95D11A.2	T05F1.9					R09F10.4	Y49E10.17
R07B1.4	F53B7.4	F54D5.15	Y97E10B.7	T05G5.11					R09G11.1	Y49E10.25
R07B1.5	F53B7.5	F54D5.4	Y9C2UA.2	T05G5.4					R09H10.2	Y49E10.9
R07B7.11	F53C3.1	F54E2.1	Y9C9A.1	T05H4.7					R09H10.5	Y49F6B.14
R07B7.14	F53C3.3	F54E2.5	Y9C9A.13	T06E6.15					R09H10.7	Y49G5A.1
R07B7.15	F53C3.5	F54E4.1	Y9C9A.3	T06E6.3					R102.11	Y4C6A.2
R07B7.6	F53F1.5	F54E4.2	ZC132.9	T06G6.8					R102.4	Y4C6B.2
R07B7.9	F53F1.7	F54F11.1	ZC142.1	T07C4.5					R102.7	Y50D4B.6
R07C3.9	F53F4.4	F54F11.2	ZC15.3	T07D10.3					R10D12.6	Y50D4C.1
R07E3.4	F53F4.8	F54F11.3	ZC15.5	T07E3.2					R10E11.5	Y50D7A.1
R07E3.6	F53F8.2	F54F2.1	ZC15.6	T07F10.6					R10F2.1	Y50D7A.5
R07E3.7	F53G12.3	F54F3.3	ZC168.2	T07H6.1					R10F2.4	Y50E8A.9
R07E5.4	F54A5.3	F54F7.2	ZC168.5	T07H8.5					R10F2.5	Y51A2D.4
R07G3.6	F54B11.11	F54F7.7	ZC190.10	T08A9.12					R10H1.4	Y51B9A.3
R08A2.1	F54B11.2	F54G8.2	ZC204.1	T08A9.7					R10H10.5	Y51F10.3
R08A2.5	F54B11.7	F54G8.5	ZC204.13	T08A9.8					R11.2	Y51H1A.4
R08B4.1	F54B11.9	F54H12.2	ZC21.10	T08B2.8					R11A5.7	Y51H4A.12
R08C7.4	F54C1.9	F54H12.7	ZC239.10	T08D10.3					R11A8.8	Y51H4A.13
R08D7.7	F54C8.1	F54H5.2	ZC239.13	T08D2.2					R11F4.2	Y51H4A.22
R08E3.1	F54D1.1	F55A11.5	ZC239.14	T08E11.7					R11H6.1	Y51H4A.32
R08E3.2	F54D1.4	F55A4.7	ZC239.16	T08G11.5					R12A1.2	Y51H7C.9
R08E5.1	F54D1.5	F55C10.2	ZC239.17	T08G5.1					R12C12.1	Y52E8A.1
R08E5.3	F54D10.4	F55C12.6	ZC239.5	T08G5.10					R12C12.3	Y53C10A.10
R08F11.3	F54D12.10	F55C5.2	ZC262.4	T08G5.12					R12C12.9	Y53C10A.2
R08F11.4	F54D12.3	F55C5.9	ZC328.5	T08G5.3					R12H7.1	Y53F4B.17
R09A1.3	F54D12.8	F55C9.8	ZC334.7	T09A12.2					R12H7.4	Y53F4B.19
R09B5.4	F54D5.15	F55D12.4	ZC334.8	T09A12.5					R13.2	Y53F4B.23
R09B5.7	F54D8.1	F55E10.1	ZC373.2	T09A5.15					R134.2	Y53F4B.25
R09D1.10	F54E2.2	F55F1.3	ZC374.1	T09A5.6					R13A1.4	Y53F4B.27
R09D1.11	F54E2.3	F55F3.4	ZC395.5	T09A5.7					R13A1.9	Y53F4B.32
R09D1.2	F54E2.5	F55F8.1	ZC404.1	T09B4.3					R13A5.4	Y53F4B.5
R09E12.2	F54E4.2	F55F8.8	ZC412.6	T09B4.4					R13D11.4	Y53F4B.6
R09H10.5	F54F11.2	F55G1.12	ZC443.5	T09B4.6					R13D11.8	Y53F4B.9
R102.1	F54F11.3	F55G1.13	ZC47.13	T09D3.4					R13D7.7	Y54E10A.13
R102.4	F54F2.1	F55G1.15	ZC487.5	T09E11.2					R13F6.5	Y54E10A.9
R105.1	F54F3.1	F55G11.4	ZC504.1	T09F5.8					R13F6.8	Y54E10BL.1
R10D12.9	F54F3.3	F55G11.5	ZC513.12	T09F5.9					R153.1	Y54E10BL.2
R10E9.3	F54G8.1	F55G11.7	ZK1010.6	T09H2.1					R173.1	Y54E2A.1
R10H1.4	F54G8.2	F55G11.8	ZK1055.2	T10B10.9					R186.5	Y54E2A.11
R10H1.5	F54G8.5	F55G11.9	ZK1098.11	T10B9.2					R193.2	Y54E2A.3
R10H10.3	F54H12.7	F56A12.2	ZK112.5	T10B9.5					R52.7	Y54E2A.7
R11A5.7	F54H5.2	F56B3.2	ZK1240.10	T10B9.9					R52.8	Y54F10AM.2
R11A8.3	F55A11.5	F56B3.9	ZK1240.6	T10E10.3					R57.1	Y54G11A.13
R11D1.11	F55A12.1	F56C11.6	ZK1248.17	T10E9.6					R57.2	Y54G2A.24
R11E3.1	F55A4.7	F56C4.1	ZK1251.2	T10E9.8					R90.2	Y54G2A.27
R11E3.5	F55B12.1	F56C9.7	ZK1290.10	T10F2.5					R90.5	Y54G2A.36
R11G1.3	F55B12.9	F56D1.6	ZK1307.2	T10G3.6					SSSD1.1	Y54G2A.40
R11G11.6	F55C10.2	F56D2.5	ZK1307.3	T10H4.11					T01B10.1	Y54G2A.5
R11H6.1	F55C12.6	F56D2.8	ZK1320.4	T10H9.5					T01B11.1	Y54G2A.8
R12A1.4	F55C5.2	F56D3.1	ZK177.10	T11F9.5					T01B11.2	Y55B1AR.2
R12C12.1	F55C5.9	F56D5.3	ZK177.9	T11F9.6					T01B4.2	Y55B1AR.3
R12C12.9	F55D10.4	F56D6.13	ZK250.2	T12A7.4					T01B6.4	Y55B1BR.4
R12E2.4	F55D12.4	F56D6.14	ZK250.8	T12B5.1					T01B7.7	Y55D5A.4
R12E2.5	F55F3.2	F56D6.2	ZK262.4	T12B5.10					T01C4.1	Y55F3AM.14
R12H7.2	F55F3.4	F56E10.2	ZK337.1	T12B5.6					T01C8.7	Y55F3AM.3
R13A1.5	F55F8.7	F56F4.9	ZK353.5	T12B5.8					T01D1.3	Y55F3C.7
R13A5.4	F55G1.12	F56H1.1	ZK354.11	T13B5.6					T01G5.2	Y56A3A.1
R13H4.3	F55G1.13	F56H6.12	ZK381.3	T13F2.5					T01H3.1	Y57A10A.10
R144.1	F55G11.1	F56H9.6	ZK402.1	T13F3.5					T01H8.2	Y57A10A.19
R148.7	F55G11.2	F57B1.3	ZK470.1	T13F3.6					T02B5.1	Y57A10A.28
R17.3	F55G11.9	F57B7.2	ZK488.1	T13F3.8					T02B5.2	Y57G11B.1
R173.1	F55H12.1	F57B7.3	ZK507.4	T13G4.6					T02C12.4	Y57G11C.14
R186.6	F55H12.3	F57B9.10	ZK546.3	T14A8.2					T02C5.5	Y57G11C.17
R193.2	F55H12.6	F57B9.3	ZK546.6	T14D7.3					T02E1.5	Y57G11C.18
R52.7	F56A11.6	F57B9.6	ZK550.1	T14E8.3					T02E9.2	Y57G11C.20
R52.8	F56A12.2	F57B9.9	ZK550.2	T14E8.4					T02G5.3	Y57G11C.23
R57.1	F56C4.1	F57C12.1	ZK593.9	T14G10.4					T02G6.11	Y58A7A.2
R57.2	F56D2.8	F57C12.3	ZK6.8	T14G8.2					T02G6.2	Y59A8B.1
T01B10.2	F56D3.1	F57C12.4	ZK616.2	T15B12.1					T02G6.3	Y59E9AL.5
T01B11.2	F56D5.3	F57E7.1	ZK617.2	T15H9.5					T03D3.1	Y5H2A.4
T01B7.7	F56D6.13	F57F4.1	ZK637.15	T16G1.5					T03E6.3	Y5H2B.1
T01C8.3	F56D6.14	F57F4.3	ZK666.2	T16G1.6					T03G6.1	Y60A3A.1
T01D1.4	F56D6.2	F57F4.4	ZK666.6	T17A3.12					T03G6.3	Y60A3A.10
T01D1.8	F56F11.5	F57F5.2	ZK673.1	T17A3.3					T04A8.1	Y60A3A.2
T01D3.6	F56H11.1	F57F5.3	ZK686.5	T17A3.7					T04A8.3	Y60A3A.5
T01G6.4	F56H6.11	F57G12.2	ZK688.4	T17A3.8					T04A8.5	Y60A9A.1
T01G6.7	F56H6.12	F57G4.4	ZK697.14	T17H7.1					T04B2.3	Y60C6A.1
T01H8.2	F56H6.2	F57G8.4	ZK75.1	T18D3.5					T04B8.5	Y61B8B.1
T02B11.4	F56H6.5	F57H12.4	ZK75.2	T18D3.9					T04C10.4	Y62E10A.19
T02B5.1	F56H9.6	F58A4.11	ZK757.3	T19A5.4					T04D1.2	Y62E10A.3
T02C12.1	F57A10.6	F58A6.1	ZK783.5	T19B4.4					T04F3.1	Y63D3A.10
T02D1.5	F57A8.6	F58A6.10	ZK783.6	T19C3.7					T04F8.9	Y63D3A.5
T02E1.1	F57A8.7	F58A6.4	ZK836.3	T19C3.9					T04G9.2	Y64G10A.7
T02E1.5	F57B7.2	F58A6.6	ZK84.5	T19C4.6					T04H1.8	Y65B4A.6
T02E1.6	F57B9.6	F58A6.8	ZK84.7	T19C4.7					T05A10.4	Y65B4BR.1
T02E9.2	F57B9.9	F58B3.8	ZK849.6	T19D12.4					T05A7.11	Y66A7A.3
T02G5.3	F57C7.4	F58B4.1	ZK856.6	T19D12.7					T05A7.2	Y66D12A.12
T02G5.6	F57F4.1	F58B4.2	ZK863.5	T19D12.9					T05A7.5	Y66D12A.19
T02G6.1	F57F4.4	F58D5.7	ZK892.6	T19D2.2					T05A8.5	Y67D8C.7
T02H6.6	F57F5.1	F58E1.13	ZK899.4	T19D2.3					T05A8.7	Y69A2AR.14
T03D3.1	F57F5.2	F58E1.2	ZK938.3	T19D7.1					T05B11.4	Y69A2AR.18
T03E6.5	F57G12.2	F58E1.6	ZK945.8	T19E7.1					T05B11.7	Y69A2AR.2
T03E6.7	F57G4.1	F58E1.9	ZK970.6	T19H12.9					T05B4.12	Y69A2AR.29
T03F1.10	F57G8.4	F58E6.11	ZK970.7	T20B3.14					T05B4.13	Y69A2AR.32
T03F7.6	F57H12.4	F58F6.1	ZK993.2	T20D3.2					T05B4.3	Y69A2AR.7
T03F7.7	F57H12.5	F58F9.6	ZK994.6	T20F7.3					T05C12.10	Y69A2AR.9
T03G11.2	F58A4.11	F58G1.3		T20G5.8					T05E11.8	Y69H2.1
T03G6.1	F58A6.10	F58G1.5		T20H4.2					T05E12.6	Y69H2.10
T04A8.5	F58A6.2	F58G1.9		T20H9.2					T05E7.1	Y69H2.3
T04B2.3	F58A6.5	F58G4.1		T21B10.6					T05E7.2	Y6E2A.4
T04B2.7	F58A6.6	F58G6.4		T21B4.2					T05E8.1	Y6E2A.5
T04C10.4	F58A6.8	F58G6.5		T21C12.4					T05F1.7	Y6E2A.9
T04F3.2	F58A6.9	F58H1.2		T21C9.11					T05G5.2	Y70C5C.5
T04F3.4	F58B3.2	F58H1.4		T21C9.4					T05H10.8	Y70D2A.1
T04F8.9	F58B3.3	F58H1.5		T21D11.1					T05H4.3	Y70G10A.2
T04H1.8	F58B3.8	F58H1.6		T21D12.14					T05H4.7	Y71A12B.13
T05A12.2	F58B4.1	F58H7.1		T21E3.2					T06A1.1	Y71A12B.15
T05A7.5	F58B4.2	F59A1.11		T21E8.1					T06A1.4	Y71A12B.8
T05B11.4	F58B6.1	F59A1.7		T21E8.2					T06A1.5	Y71D11A.1
T05C1.3	F58D12.3	F59A3.8		T21G5.2					T06A4.1	Y71D11A.3
T05C12.10	F58D2.2	F59A6.3		T22B7.7					T06A4.3	Y71F9B.14
T05C3.6	F58D5.7	F59A6.4		T22C1.2					T06D4.4	Y71F9B.8
T05E12.6	F58E1.2	F59A7.1		T22C1.4					T06D8.3	Y71F9B.9
T05E7.1	F58E1.6	F59B1.4		T22C8.5					T06E6.15	Y71G12A.3
T05E7.2	F58E6.10	F59B1.7		T22D1.11					T06E6.3	Y71G12A.4
T05F1.9	F58E6.11	F59B1.8		T22E5.1					T06G6.6	Y71G12B.11
T05G5.6	F58E6.3	F59B10.1		T22F7.4					T06H11.1	Y71G12B.15
T05H4.15	F58E6.4	F59C12.1		T22G5.2					T07A5.4	Y71G12B.20
T05H4.5	F58E6.5	F59C6.3		T22G5.4					T07C12.8	Y71G12B.22
T06A1.5	F58E6.7	F59C6.8		T22G5.7					T07D3.6	Y71G12B.25
T06A4.3	F58F6.1	F59D12.3		T22H6.5					T07E3.4	Y71G12B.26
T06D8.10	F58F9.6	F59E11.2		T23B3.5					T07F10.4	Y71G12B.31
T06E4.6	F58G1.3	F59E12.4		T23B7.1					T07G12.3	Y71G12B.32
T06E4.7	F58G1.9	F59E12.5		T23D8.6					T07H3.5	Y71G12B.7
T06E6.3	F58G11.4	F59F4.1		T23E1.3					T07H6.1	Y73B3A.1
T06E6.5	F58G4.1	F59F5.5		T23F2.3					T07H6.4	Y73B3A.18
T06E8.1	F58G4.2	F59F5.7		T23F2.5					T07H6.5	Y73B3B.1
T06G6.6	F58G4.6	F59H6.2		T23G11.6					T07H8.3	Y73B3B.3
T06G6.7	F58G6.4	H02F09.2		T23H4.1					T08B1.2	Y73B6A.1
T07A5.3	F58G6.6	H02F09.3		T23H4.3					T08B6.2	Y73B6BL.16
T07A5.4	F58G6.8	H02I12.3		T24A6.1					T08D10.4	Y73C8A.1
T07A9.1	F58G6.9	H02K04.1		T24B8.5					T08E11.4	Y73C8B.4
T07A9.12	F58H1.2	H03E18.1		T24C12.4					T08E11.7	Y73F8A.16
T07E3.4	F58H7.1	H03E18.2		T24C4.4					T08G11.3	Y73F8A.22
T07F10.1	F58H7.3	H04M03.1		T24C4.7					T08G3.7	Y73F8A.33
T07F10.4	F59A1.11	H04M03.4		T24D3.2					T08H4.2	Y74C10AR.1
T07G12.3	F59A3.8	H06H21.10		T24D5.4					T09A5.2	Y75B7AL.4
T07G12.5	F59A6.3	H06I04.5		T24F1.7					T09B4.7	Y75B7B.1
T07H3.2	F59A6.4	H06O01.1		T24H10.7					T09B4.8	Y75B8A.10
T07H3.6	F59A7.1	H08M01.1		T24H7.4					T09B9.5	Y75B8A.21
T07H8.6	F59B1.4	H09F14.1		T25B2.3					T09F5.11	Y75B8A.30
T08A9.12	F59B1.7	H10E21.4		T25B6.4					T10B10.4	Y75B8A.6
T08A9.8	F59B10.3	H11E01.3		T25B9.12					T10B10.5	Y76B12C.1
T08B1.1	F59B2.12	H11L12.1		T25C12.4					T10B5.10	Y76B12C.9
T08B2.3	F59C6.2	H12D21.11		T25D10.1					T10B5.8	Y77E11A.16
T08B6.2	F59C6.8	H12I13.1		T26A5.8					T10B9.4	Y7A5A.8
T08B6.5	F59D12.3	H14N18.2		T26A8.2					T10B9.7	Y7A9D.1
T08D2.1	F59D12.4	H19J13.1		T26A8.3					T10D4.13	Y80D3A.7
T08D2.2	F59D6.3	H19M22.3		T26C11.8					T10D4.5	Y80D3A.8
T08E11.3	F59E11.2	H20E11.1		T26E3.1					T10E10.3	Y82E9BL.12
T08G2.2	F59E12.4	H20E11.2		T26E3.10					T10E10.5	Y82E9BL.14
T09A12.1	F59F3.2	H22K11.3		T26E3.6					T10E10.7	Y82E9BR.14
T09A5.6	F59F5.5	H23L24.3		T26E4.12					T10E9.3	Y82E9BR.16
T09B4.4	F59H6.2	H23L24.4		T26G10.5					T10G3.3	Y82E9BR.17
T09B4.7	H01G02.2	H23N18.1		T26H5.4					T10H4.4	Y87G2A.12
T09B4.8	H02F09.2	H23N18.2		T26H5.9					T10H4.8	Y87G2A.15
T09B9.5	H02I12.3	H23N18.3		T27A3.5					T10H9.5	Y8A9A.3
T09E8.4	H03E18.1	H23N18.5		T27B7.2					T10H9.6	Y8A9A.4
T09F5.1	H03E18.2	H24K24.5		T27B7.3					T11A5.1	Y92C3B.2
T09F5.10	H03G16.2	H25K10.1		T27B7.5					T11B7.4	Y95B8A.1
T09F5.11	H04M03.1	H25K10.4		T27E4.4					T11F9.18	Y95B8A.2
T09F5.9	H04M03.4	H27M09.5		T27E4.6					T11F9.19	Y95B8A.4
T10B10.1	H05L14.1	H32C10.1		T27E4.7					T11F9.2	Y9C9A.1
T10B10.8	H06H21.9	H32C10.3		T27E9.8					T11F9.6	Y9D1A.1
T10B5.10	H06I04.5	H37A05.2		T28A11.17					T11G6.7	ZC116.3
T10B9.7	H08M01.1	H42K12.3		T28A11.19					T12A2.10	ZC13.2
T10C6.10	H10E21.2	H43E16.1		T28A11.2					T12A2.5	ZC132.2
T10D4.4	H11L12.1	JC8.11		T28B4.4					T12B3.1	ZC132.4
T10E9.3	H12D21.11	JC8.12		T28B8.5					T12B3.2	ZC132.6
T10E9.4	H19J13.1	K01A12.3		T28D6.2					T12B5.13	ZC142.1
T10E9.8	H20J04.1	K01A2.11		T28D6.3					T12C9.1	ZC15.3
T10G3.3	H22K11.3	K01A6.4		T28D9.7					T12D8.9	ZC15.6
T10H10.1	H23L24.1	K01C8.10		T28D9.9					T12E12.6	ZC15.7
T10H4.12	H23L24.3	K01D12.11		T28F3.6					T13A10.1	ZC155.1
T10H4.4	H23L24.4	K01D12.2		T28H11.8					T13A10.10	ZC196.2
T10H4.9	H23N18.1	K01D12.3		VC5.6					T13A10.5	ZC21.9
T10H9.5	H23N18.3	K01D12.4		VK10D6R.1					T13B5.1	ZC239.4
T11F8.1	H24O09.1	K01D12.5		VY10G11R.2					T13B5.7	ZC239.7
T11F8.2	H25K10.1	K01G5.7		VZK822L.2					T13C2.3	ZC262.4
T11F9.3	H25K10.4	K02A2.5		W01A11.4					T13C5.1	ZC334.7
T11F9.5	H27M09.4	K02A4.1		W01B11.1					T13C5.3	ZC334.8
T11F9.6	H27M09.5	K02B7.4		W01B11.6					T13C5.8	ZC404.12
T11F9.9	H32C10.1	K02C4.2		W01B6.3					T13F3.6	ZC47.4
T12A7.4	H32C10.3	K02D3.1		W01C8.1					T13F3.7	ZC477.1
T12A7.9	H35N09.1	K02D3.2		W01C9.1					T14B1.1	ZC482.5
T12B3.1	H37A05.2	K02D7.5		W01C9.4					T14B4.5	ZC487.4
T12B5.1	H38K22.6	K02E10.4		W01D2.1					T14B4.6	ZC504.4
T12B5.10	H41C03.2	K02E10.7		W01D2.6					T14B4.9	ZC504.5
T12B5.2	H42K12.3	K02E11.10		W02D3.12					T14F9.1	ZC513.2
T12B5.8	H43E16.1	K02E2.1		W02D3.6					T14G8.3	ZC84.2
T12C9.1	JC8.11	K02E2.2		W02D3.7					T15B7.14	ZC84.6
T13A10.10	K01A11.4	K02E2.8		W02D9.7					T15B7.17	ZK1010.4
T13A10.12	K01A12.3	K02F2.6		W02F12.4					T15B7.3	ZK1010.7
T13B5.6	K01A2.11	K02F6.1		W03A5.3					T16A1.3	ZK1053.5
T13B5.9	K01A6.4	K02F6.6		W03B1.3					T16A1.4	ZK1055.4
T13C2.2	K01A6.6	K02G10.5		W03B1.7					T16D1.1	ZK1067.5
T13C5.3	K01D12.14	K02G10.7		W03F11.3					T16G1.3	ZK1073.1
T13C5.7	K01D12.2	K03A1.5		W03F8.9					T16G1.5	ZK112.3
T13F2.4	K01D12.3	K03A11.3		W03F9.9					T16G12.1	ZK1225.5
T13F3.6	K01D12.4	K03A11.4		W03G11.2					T16H12.2	ZK1240.1
T13H10.2	K01D12.5	K03B8.2		W03G9.6					T17A3.9	ZK1251.3
T13H5.2	K01H12.2	K03H1.1		W03G9.7					T17H7.1	ZK1290.3
T14B1.2	K01H12.3	K03H1.12		W03H1.2					T17H7.4	ZK154.6
T14B4.5	K02A2.5	K03H1.13		W04C9.2					T18D3.4	ZK177.3
T14B4.6	K02A4.1	K03H1.9		W04E12.7					T18D3.9	ZK177.9
T14B4.7	K02A6.2	K03H4.1		W04E12.9					T19A5.3	ZK180.5
T14G12.2	K02B12.4	K03H6.1		W04G3.12					T19C3.2	ZK20.2
T14G12.3	K02B7.4	K03H9.2		W04H10.1					T19C4.8	ZK250.7
T15B7.1	K02C4.2	K03H9.3		W04H10.2					T19D12.4	ZK262.3
T15B7.14	K02D3.2	K04A8.6		W04H10.4					T19D2.1	ZK262.9
T15B7.16	K02D7.5	K04C2.7		W05B2.5					T19D7.5	ZK355.5
T15B7.3	K02E10.4	K04C2.8		W05B2.6					T19E7.5	ZK355.6
T16A9.5	K02E10.7	K04E7.1		W05B2.7					T19H12.5	ZK380.4
T16G1.2	K02E11.1	K04F1.10		W05E10.5					T19H12.9	ZK384.2
T16G1.5	K02E11.2	K04F1.12		W05E7.3					T20D4.13	ZK402.2
T16G1.6	K02E11.4	K04F10.2		W06A11.2					T20D4.3	ZK430.3
T16G1.8	K02E11.6	K04G2.7		W06A7.4					T20D4.5	ZK455.5
T16G12.1	K02E2.1	K04H4.2		W06D11.2					T20F10.4	ZK470.2
T16G12.7	K02E2.2	K04H4.6		W06D11.3					T20F7.3	ZK470.6
T16H12.6	K02E2.8	K05B2.4		W06D4.3					T20G5.13	ZK484.1
T17A3.8	K02E7.10	K05C4.1		W07G4.1					T20G5.5	ZK507.3
T17H7.7	K02F2.2	K05C4.4		W07G4.6					T20G5.6	ZK520.3
T18H9.1	K02F3.3	K05F1.1		W08F4.2					T20H9.3	ZK563.1
T18H9.2	K02F6.1	K05F1.10		W08F4.7					T20H9.4	ZK596.2
T19A5.3	K02G10.5	K05F1.3		W08F4.9					T21B10.6	ZK596.3
T19B10.1	K03A11.3	K05F1.9		W09G10.6					T21B4.15	ZK6.7
T19B10.2	K03A11.4	K05F6.9		W09G12.10					T21B4.4	ZK6.8
T19B10.5	K03B4.6	K06A1.2		W10C8.4					T21B6.2	ZK617.2
T19B10.9	K03B8.2	K06A4.1		W10C8.6					T21B6.3	ZK637.15
T19C3.2	K03B8.5	K06A4.4		W10G11.12					T21C12.1	ZK643.8
T19C4.8	K03H1.1	K06A4.5		W10G11.3					T21C12.2	ZK666.7
T19C9.8	K03H1.12	K06A9.1		W10G11.4					T21C12.3	ZK666.8
T19D12.1	K03H1.13	K06B9.2		Y102A11A.5					T21C9.3	ZK669.7
T19D12.9	K03H4.1	K06B9.4		Y102A11A.7					T21C9.7	ZK678.3
T19D7.3	K03H6.1	K06C4.17		Y102A11A.9					T21E12.2	ZK686.5
T19H12.9	K03H9.2	K06C4.9		Y102A5B.3					T21E12.3	ZK757.3
T20B3.12	K03H9.3	K06G5.1		Y102E9.5					T21E3.3	ZK813.5
T20B3.13	K04A8.10	K07C5.7		Y105C5A.17					T21E8.1	ZK813.6
T20B3.15	K04C2.7	K07C6.11		Y105C5B.5					T21E8.2	ZK829.2
T20B3.16	K04C2.8	K07C6.3		Y105E8B.11					T21G5.2	ZK836.1
T20D3.2	K04D7.6	K07C6.4		Y105E8B.6					T21G5.5	ZK849.1
T20D4.1	K04E7.1	K07C6.5		Y106G6A.4					T21G5.6	ZK849.2
T20D4.13	K04E7.2	K07D4.6		Y106G6D.2					T21H3.2	ZK856.4
T20D4.3	K04F1.10	K07D8.1		Y106G6D.6					T21H3.4	ZK863.1
T20D4.5	K04F1.12	K07E12.1		Y106G6D.8					T21H8.2	ZK892.1
T20H9.1	K04F1.3	K07E8.11		Y106G6H.16					T22A3.4	ZK899.3
T20H9.4	K04H4.2	K07E8.5		Y110A2AL.3					T22A3.8	ZK899.4
T21B4.12	K04H4.6	K07G5.4		Y110A2AM.4					T22B11.4	ZK899.7
T21B4.7	K04H8.3	K07H8.5		Y110A7A.15					T22B2.5	ZK909.4
T21B6.2	K05B2.5	K08A8.1		Y110A7A.21					T22B7.7	ZK930.7
T21C12.2	K05D4.4	K08B12.1		Y110A7A.3					T22C1.7	ZK945.1
T21C9.11	K05D4.6	K08B4.3		Y111B2A.2					T22D1.11	ZK945.9
T21C9.6	K05D4.9	K08B4.4		Y116A8B.4					T22D1.12	ZK970.1
T21C9.7	K05F1.1	K08B4.5		Y116A8C.29					T22E5.5	ZK970.5
T21C9.8	K05F1.3	K08C7.5		Y116A8C.44					T22E5.6	ZK993.1
T21C9.9	K05F1.6	K08C9.1		Y116F11A.3					T22E7.1	ZK993.2
T21D12.11	K05F1.7	K08C9.4		Y119D3A.3					T22E7.2
T21D12.2	K05F1.9	K08D10.10		Y119D3B.15					T22F7.4
T21F2.1	K05F6.9	K08D10.9		Y119D3B.21					T22G5.1
T21G5.1	K06A1.1	K08D12.5		Y119D3B.7					T22G5.4
T21G5.2	K06A1.2	K08D8.4		Y119D3B.9					T22G5.5
T21G5.6	K06A4.2	K08D8.6		Y14H12A.1					T22G5.6
T21H3.1	K06A4.5	K08E3.1		Y17D7B.2					T22G5.7
T21H3.2	K06A5.2	K08E4.5		Y17G7B.14					T22H2.2
T22B11.2	K06A9.1	K08E5.2		Y17G7B.19					T22H6.2
T22B3.1	K06B4.1	K08E5.3		Y17G9B.2					T23B12.5
T22B3.2	K06B9.2	K08E7.3		Y18D10A.2					T23E7.2
T22B3.3	K06B9.4	K08E7.5		Y18H1A.1					T23E7.5
T22B7.1	K06C4.17	K08E7.7		Y18H1A.8					T23F11.3
T22B7.7	K06C4.6	K08E7.9		Y19D2B.2					T23F2.1
T22C1.5	K06C4.9	K08F8.2		Y22D7AL.11					T23F4.4
T22C8.1	K06H7.8	K08F8.4		Y22D7AL.14					T23G11.10
T22D1.11	K07A1.4	K08F8.5		Y22D7AR.9					T23G4.5
T22E7.1	K07A3.3	K08F8.7		Y22F5A.5					T23G5.5
T22F3.8	K07C5.7	K08H10.6		Y23B4A.2					T23H2.4
T22F7.4	K07C6.11	K08H2.5		Y23H5B.8					T23H4.1
T22G5.5	K07C6.3	K09A11.4		Y24D9A.5					T24A6.20
T22G5.6	K07C6.4	K09A9.1		Y25C1A.2					T24C12.3
T22H6.2	K07C6.5	K09B11.10		Y26D4A.2					T24C4.4
T23D5.6	K07E12.1	K09B11.4		Y26D4A.4					T24D11.1
T23E1.1	K07E12.2	K09B3.1		Y27F2A.6					T25B6.2
T23F2.1	K07E8.1	K09C4.5		Y32B12A.3					T25B9.1
T23F4.2	K07E8.11	K09C6.7		Y32B12C.1					T25B9.5
T23F6.5	K07E8.5	K09C8.1		Y32F6B.3					T25C12.3
T23H4.3	K07F5.11	K09D9.1		Y32G9A.13					T25C8.1
T24B8.5	K07F5.4	K09D9.12		Y34B4A.9					T25C8.2
T24C2.1	K07G5.3	K09D9.2		Y34D9A.11					T25D1.2
T24C4.4	K07G5.4	K09E10.1		Y34F4.4					T25E12.12
T24C4.7	K07H8.5	K09E10.2		Y37D8A.6					T25E12.13
T24C4.8	K08B12.1	K09E9.1		Y37E3.3					T25F10.6
T24E12.5	K08B4.5	K09F5.2		Y37F4.1					T25G12.6
T25B9.1	K08C7.4	K09F6.4		Y37H2A.13					T26C11.8
T25C12.3	K08C9.1	K09F6.5		Y37H2A.14					T26C12.2
T25C12.4	K08C9.2	K09H9.3		Y38E10A.24					T26E4.4
T25C8.1	K08C9.4	K10B3.8		Y38E10A.25					T26E4.7
T25C8.2	K08D10.10	K10B3.9		Y38E10A.5					T26H10.1
T25D10.1	K08D10.9	K10C2.1		Y38F1A.6					T26H2.1
T25D10.5	K08D8.3	K10C2.5		Y38F1A.7					T26H2.3
T25E12.11	K08D8.4	K10C8.2		Y38F1A.9					T26H2.8
T25E12.12	K08E4.5	K10C9.8		Y38H6C.1					T27A1.1
T25E12.13	K08E5.2	K10D11.3		Y38H6C.20					T27A10.2
T25G12.6	K08E7.5	K10D11.5		Y38H6C.23					T27A10.3
T26C12.2	K08F4.11	K10D11.6		Y38H6C.9					T27A8.5
T26C12.6	K08F4.4	K10D2.2		Y38H8A.2					T27B7.4
T26C5.1	K08F4.6	K10D2.6		Y39A1A.2					T27C4.3
T26C5.2	K08F4.8	K10D6.1		Y39B6A.1					T27E4.5
T26E4.4	K08F8.1	K10F12.7		Y39B6A.27					T27E4.6
T27A10.3	K08F8.5	K10G4.13		Y39B6A.5					T27F2.4
T27A10.6	K08H10.6	K10G4.4		Y39D8A.1					T28A11.11
T27A3.1	K09A11.2	K10G6.2		Y39E4A.1					T28A11.21
T27B7.3	K09A11.3	K10G6.5		Y39E4B.4					T28A11.6
T27B7.4	K09B11.10	K10H10.1		Y39G10AR.15					T28B4.2
T27C10.4	K09B11.4	K10H10.2		Y39G10AR.16					T28B8.3
T27C4.2	K09B3.1	K10H10.4		Y39G10AR.6					T28C12.4
T27C5.12	K09C6.7	K11C4.1		Y39G8B.7					T28C6.3
T27C5.8	K09C6.9	K11D12.3		Y40A1A.1					T28D6.3
T27E9.8	K09C8.5	K11D12.5		Y40B1B.7					T28D9.7
T28A11.21	K09C8.8	K11D9.1		Y40C7B.4					T28D9.9
T28B4.4	K09D9.2	K11E4.1		Y40D12A.2					T28F2.6
T28D6.2	K09E10.2	K11E4.3		Y40H4A.2					T28F3.4
T28D6.7	K09E2.2	K11G9.1		Y41C4A.17					T28F4.2
T28F2.7	K09E4.1	K11G9.3		Y41C4A.18					W01A11.4
T28F3.4	K09E4.4	K11G9.4		Y41D4B.14					W01A8.3
T28F3.8	K09F5.2	K11H12.10		Y41D4B.15					W01A8.6
T28F4.3	K09F6.3	K11H12.3		Y41D4B.16					W01B6.5
T28H10.2	K09F6.4	K11H12.4		Y41D4B.18					W01B6.8
T28H10.3	K09F6.5	K11H12.5		Y41D4B.5					W01C8.6
T28H11.7	K09F6.6	K12B6.8		Y42A5A.3					W01C9.1
VC5.3	K09G1.4	K12D9.1		Y42G9A.2					W01F3.1
VW02B12L.1	K09H11.6	K12G11.1		Y42H9AR.5					W01F3.3
VZC374L.1	K10B2.2	K12G11.4		Y43C5A.1					W02A2.5
VZK822L.2	K10B3.8	M01A12.3		Y43C5A.7					W02B3.6
W01A11.4	K10B3.9	M01A12.4		Y43C5B.3					W02B8.3
W01A8.6	K10C2.1	M01B2.2		Y43D4A.6					W02B8.4
W01A8.7	K10C2.3	M01B2.6		Y43F4B.10					W02B8.5
W01C8.5	K10C2.5	M01D7.1		Y43F8A.1					W02B8.6
W01F3.3	K10C8.2	M01E10.2		Y43F8C.11					W02C12.1
W02B12.1	K10C9.7	M01E10.3		Y43F8C.16					W02D7.10
W02B12.4	K10C9.8	M01E11.4		Y43F8C.18					W02D9.10
W02B8.6	K10D11.3	M01G12.12		Y43F8C.2					W02H5.5
W02D7.5	K10D11.6	M01G12.14		Y43F8C.9					W03A5.7
W02G9.2	K10D3.1	M01G12.7		Y44A6B.1					W03B1.7
W02G9.4	K10D6.1	M01G12.9		Y44A6B.3					W03D2.5
W02H3.1	K10F12.3	M01H9.1		Y44A6B.4					W03D8.10
W03A5.2	K10F12.7	M01H9.2		Y44A6D.2					W03D8.11
W03B1.2	K10G4.13	M02D8.7		Y44A6E.1					W03F11.2
W03D2.6	K10G6.2	M02F4.1		Y44E3A.1					W03F8.10
W03D8.11	K10H10.4	M02F4.7		Y45F10A.5					W03F8.2
W03F9.11	K11C4.1	M02G9.1		Y45F10B.14					W03F8.5
W04B5.3	K11D12.1	M02G9.2		Y45F10B.3					W03F8.9
W04E12.6	K11D2.2	M02G9.3		Y45F10C.2					W03F9.9
W04E12.8	K11E4.1	M02H5.10		Y45F10C.4					W03G1.1
W04G3.1	K11E4.3	M02H5.11		Y45F10D.14					W03G11.1
W04G3.2	K11G12.2	M02H5.3		Y45F10D.2					W03G11.3
W04G3.3	K11G9.3	M02H5.4		Y45F3A.8					W03G11.4
W04G3.8	K11G9.4	M02H5.6		Y46C8AL.2					W03H1.2
W05B2.5	K11H12.11	M02H5.7		Y46C8AL.3					W04E12.4
W05B2.6	K12B6.8	M03A1.7		Y46G5A.14					W04G3.10
W05B2.7	K12D9.1	M03B6.3		Y46G5A.20					W04G3.2
W05E10.4	K12G11.1	M03D4.4		Y46G5A.8					W04G3.3
W05E10.5	M01A12.3	M03E7.4		Y46H3A.2					W05B10.5
W06A11.3	M01A12.4	M03F4.6		Y46H3A.3					W05B2.5
W06B11.4	M01B2.1	M03F8.1		Y46H3D.1					W05B2.7
W06B3.1	M01B2.2	M04C3.2		Y47D3A.13					W05B5.2
W06B3.2	M01B2.6	M04C7.4		Y47D3A.2					W05E7.3
W06D12.5	M01B2.8	M04C9.1		Y47D3A.20					W05G11.4
W06D4.1	M01D1.2	M04C9.5		Y47D7A.16					W05G11.6
W06D4.3	M01E10.2	M04F3.3		Y47D9A.3					W06A7.2
W06G6.9	M01F1.7	M04G7.1		Y47G6A.27					W06B11.4
W07A12.6	M01G12.7	M05B5.6		Y47H9B.2					W06B3.1
W07A12.7	M01H9.2	M110.2		Y47H9C.1					W06D11.4
W07A12.8	M02B1.4	M110.9		Y47H9C.14					W06D12.2
W07B8.1	M02B7.6	M142.2		Y47H9C.4					W06D12.5
W07G1.2	M02D8.4	M151.2		Y48A6B.4					W06H8.8
W07G1.3	M02D8.7	M151.4		Y48B6A.9					W07A12.7
W08D2.1	M02F4.1	M151.6		Y48E1B.11					W07A12.8
W08E12.1	M02G9.1	M153.5		Y48E1B.8					W07A8.1
W08F4.6	M02G9.2	M162.11		Y48G10A.6					W07G1.3
W08G11.1	M02G9.3	M162.5		Y48G8AL.12					W07G1.5
W09C5.4	M02H5.4	M162.8		Y49A3A.4					W08F4.12
W09G12.10	M03B6.2	M163.11		Y49C4A.8					W08F4.9
W10G11.10	M03B6.3	M176.1		Y49E10.22					W08G11.1
Y102A11A.1	M03D4.4	M18.1		Y49F6A.5					W09C3.8
Y102A11A.3	M03E7.4	M195.1		Y49F6B.6					W09C5.4
Y102A11A.5	M03F4.6	M195.2		Y49F6C.2					W09G10.6
Y102A5B.1	M03F8.1	M199.5		Y4C6A.3					W09G12.10
Y102A5B.2	M03F8.4	M28.10		Y4C6A.4					W10C8.1
Y102A5B.3	M03F8.5	M28.2		Y4C6B.4					W10C8.5
Y102A5C.32	M04C3.2	M28.6		Y50D4B.4					W10G11.16
Y102E9.5	M04C9.1	M28.8		Y50D4B.7					W10G11.17
Y105C5B.14	M04C9.5	M28.9		Y50E8A.12					W10G6.1
Y105C5B.15	M04D8.6	M6.4		Y50E8A.2					W10G6.3
Y105C5B.18	M04G7.1	M60.2		Y51A2D.10					Y102A11A.3
Y105C5B.2	M05B5.1	M7.7		Y51A2D.18					Y102A11A.6
Y105C5B.6	M05B5.6	M70.1		Y51A2D.21					Y102A5B.1
Y105C5B.8	M05D6.4	M70.3		Y51B9A.5					Y102A5C.14
Y105E8A.13	M110.2	M88.1		Y51B9A.8					Y102E9.5
Y105E8B.5	M110.9	M88.3		Y51H4A.25					Y105C5A.11
Y106G6H.1	M142.2	M88.4		Y51H4A.26					Y105C5A.23
Y110A7A.11	M151.1	M88.6		Y51H4A.9					Y105C5B.15
Y110A7A.3	M151.2	PAR2.3		Y51H7BR.2					Y105E8A.32
Y113G7A.14	M151.4	R01B10.5		Y51H7BR.4					Y105E8A.4
Y113G7B.14	M153.4	R01E6.2		Y51H7C.8					Y105E8A.6
Y116A8C.19	M153.5	R01E6.4		Y52B11B.1					Y105E8A.7
Y116A8C.20	M162.11	R01H10.4		Y52D5A.1					Y106G6E.1
Y116A8C.5	M162.8	R01H2.2		Y52E8A.3					Y106G6G.6
Y116F11B.2	M163.11	R01H2.5		Y52E8A.4					Y10G11A.1
Y116F11B.6	M163.5	R02C2.7		Y53C10A.15					Y110A7A.2
Y119C1B.9	M163.8	R02D1.1		Y53C10A.3					Y113G7A.4
Y119D3B.13	M176.1	R02D3.1		Y53C12A.7					Y113G7A.5
Y119D3B.8	M176.10	R02D5.3		Y53C12C.1					Y113G7B.11
Y11D7A.14	M18.1	R02E4.1		Y53F4A.2					Y113G7B.15
Y11D7A.5	M195.1	R02E4.3		Y53F4B.14					Y116A8C.14
Y11D7A.9	M195.2	R02F11.1		Y53F4B.31					Y116A8C.38
Y16B4A.2	M195.3	R03C1.1		Y53G8AM.5					Y116F11B.1
Y17D7B.1	M28.6	R03D7.6		Y53G8B.1					Y116F11B.11
Y17D7C.6	M28.9	R03G5.1		Y53H1A.4					Y116F11B.3
Y17G7B.11	M6.3	R03H4.1		Y53H1B.4					Y116F11B.9
Y17G7B.14	M6.4	R03H4.6		Y54F10BM.11					Y11D7A.1
Y17G7B.19	M7.10	R04B3.1		Y54F10BM.12					Y11D7A.14
Y17G7B.8	M7.7	R04B3.3		Y54G2A.12					Y11D7A.3
Y17G9A.4	M70.1	R04B5.3		Y54G2A.32					Y11D7A.9
Y18D10A.18	M70.3	R04B5.7		Y54G2A.39					Y16B4A.2
Y18D10A.2	M88.3	R04D3.1		Y54G2A.41					Y17D7B.1
Y18D10A.22	R01E6.4	R05C11.1		Y54G2A.44					Y17D7B.3
Y18D10A.6	R01H2.2	R05D3.12		Y54G2A.47					Y17G7B.22
Y18H1A.12	R01H2.5	R05D8.7		Y54G2A.48					Y17G7B.24
Y18H1A.13	R02C2.7	R05F9.12		Y54G2A.49					Y17G9A.1
Y18H1A.9	R02D1.1	R05F9.5		Y54G2A.9					Y17G9A.2
Y20C6A.1	R02D3.1	R05F9.6		Y55B1AL.2					Y17G9B.7
Y22D7AL.11	R02E12.6	R05G6.9		Y55F3C.2					Y18D10A.12
Y22D7AL.9	R02E12.8	R05H10.6		Y56A3A.15					Y18D10A.22
Y22D7AR.13	R02E4.1	R06A4.10		Y57A10A.11					Y18D10A.26
Y22D7AR.9	R02F11.1	R06C1.2		Y57A10C.10					Y18D10A.8
Y22F5A.4	R02F2.8	R06C7.10		Y57A10C.11					Y18H1A.9
Y22F5A.5	R03A10.6	R06C7.3		Y57E12AL.2					Y19D10B.1
Y23H5B.8	R03C1.1	R07A4.2		Y57E12AR.1					Y19D10B.4
Y24D9A.5	R03D7.1	R07A4.4		Y57G11B.97					Y19D10B.6
Y26D4A.21	R03G5.1	R07B1.13		Y57G11C.40					Y1B5A.1
Y26D4A.3	R03G5.3	R07B1.5		Y57G11C.46					Y22D7AL.11
Y26D4A.4	R03G5.5	R07B1.8		Y57G11C.47					Y22D7AL.14
Y27F2A.3	R03H4.6	R07B1.9		Y57G11C.50					Y22D7AR.14
Y2C2A.1	R04B3.1	R07B7.12		Y57G11C.52					Y22D7AR.7
Y32B12A.3	R04B3.3	R07C12.4		Y57G7A.2					Y22D7AR.8
Y32B12C.1	R04B5.3	R07C3.10		Y57G7A.3					Y23H5A.8
Y32F6A.4	R04B5.7	R07C3.12		Y58A7A.4					Y23H5B.8
Y32F6A.5	R04B5.8	R07D5.1		Y58A7A.5					Y25C1A.4
Y32F6B.2	R04D3.1	R07E3.6		Y58A7A.6					Y26D4A.2
Y32F6B.3	R04E5.10	R07E4.1		Y59E9AL.6					Y26D4A.4
Y32G9A.13	R04E5.2	R07E5.15		Y5F2A.2					Y26D4A.6
Y32G9A.6	R05A10.3	R07E5.17		Y60A3A.21					Y2C2A.1
Y32G9B.1	R05C11.1	R07E5.4		Y61A9LA.7					Y2H9A.2
Y34B4A.10	R05D8.10	R07E5.6		Y62H9A.3					Y32B12C.3
Y34B4A.5	R05D8.7	R07G3.2		Y62H9A.5					Y32F6B.2
Y34B4A.6	R05F9.12	R07G3.6		Y64G10A.10					Y32F6B.3
Y34B4A.9	R05F9.5	R07H5.11		Y64H9A.2					Y32G9A.2
Y34D9A.11	R05G6.9	R08A2.2		Y66A7A.1					Y32G9A.3
Y34F4.4	R06A10.3	R08A2.5		Y66A7A.7					Y32G9A.4
Y34F4.5	R06A4.10	R08B4.1		Y66C5A.1					Y32G9A.6
Y37A1A.3	R06B10.1	R08C7.12		Y67A10A.4					Y34B4A.4
Y37A1A.4	R06B9.2	R08C7.5		Y67A10A.8					Y34F4.4
Y37A1B.13	R06C7.10	R08D7.7		Y67D8C.8					Y37A1A.3
Y37A1B.15	R06F6.7	R08E3.1		Y69A2AL.1					Y37A1A.4
Y37E11AL.1	R07A4.4	R08E5.4		Y69A2AR.27					Y37A1B.13
Y37E11B.10	R07B1.4	R08F11.1		Y6B3B.10					Y37A1B.15
Y37F4.1	R07B1.5	R08F11.3		Y6G8.14					Y37A1B.5
Y37H2A.13	R07B1.8	R08F11.4		Y70D2A.2					Y37A1B.7
Y37H2A.14	R07B1.9	R08H2.1		Y71G12B.14					Y37E11AL.1
Y38A10A.2	R07B5.4	R09A1.3		Y71G12B.21					Y37F4.5
Y38C1AA.6	R07B7.12	R09A8.4		Y71G12B.27					Y37H2A.13
Y38E10A.19	R07B7.14	R09B5.11		Y73B3A.11					Y37H2A.14
Y38E10A.5	R07B7.15	R09B5.7		Y73B6A.3					Y37H2C.1
Y38F1A.3	R07C3.1	R09D1.2		Y73B6BL.13					Y38A10A.1
Y38F1A.6	R07C3.12	R09D1.4		Y73B6BL.32					Y38A10A.2
Y38F2AL.3	R07C3.3	R09D1.5		Y73B6BL.37					Y38E10A.16
Y38H6C.1	R07D5.1	R09E10.1		Y73B6BL.42					Y38E10A.19
Y38H6C.16	R07E3.3	R09E10.2		Y73B6BL.43					Y38F1A.3
Y39A1A.9	R07E3.4	R09E10.3		Y73C8C.9					Y38F1A.4
Y39A3B.3	R07E3.6	R09E10.5		Y73E7A.4					Y38F1A.6
Y39B6A.1	R07E5.15	R09E10.6		Y73F4A.1					Y38F2AL.3
Y39B6A.19	R07E5.17	R09E12.9		Y73F4A.3					Y38F2AL.6
Y39B6A.20	R07E5.6	R09H10.4		Y73F8A.13					Y38H6A.2
Y39B6A.23	R07G3.2	R09H10.5		Y73F8A.15					Y38H6C.20
Y39B6A.24	R08A2.1	R102.1		Y73F8A.17					Y38H6C.23
Y39B6A.41	R08A2.2	R102.3		Y73F8A.2					Y38H6C.8
Y39C12A.8	R08A2.5	R102.7		Y74E4A.1					Y38H8A.4
Y39D8A.1	R08B4.1	R102.8		Y75B12B.3					Y39A1B.2
Y39D8C.1	R08C7.4	R105.1		Y75B8A.18					Y39A3A.4
Y39E4B.4	R08C7.5	R106.1		Y75B8A.23					Y39A3B.3
Y39E4B.9	R08D7.7	R10D12.1		Y75B8A.28					Y39B6A.18
Y39G8B.7	R08E3.1	R10D12.6		Y75B8A.3					Y39B6A.41
Y39H10A.4	R08F11.7	R10E9.3		Y76B12C.8					Y39B6A.9
Y39H10A.5	R08H2.1	R10F2.1		Y7A5A.11					Y39C12A.7
Y39H10B.2	R09A8.4	R10H1.2		Y82E9BL.10					Y39D8A.1
Y40C5A.3	R09B5.11	R10H1.4		Y82E9BL.11					Y39E4B.8
Y40C7B.4	R09B5.4	R10H1.5		Y82E9BL.13					Y39F10A.1
Y40D12A.2	R09B5.7	R11.2		Y82E9BL.15					Y39G8B.7
Y40H7A.10	R09D1.10	R11A5.7		Y82E9BL.19					Y40B10A.2
Y41D4B.15	R09D1.2	R11A8.3		Y82E9BL.2					Y40D12A.2
Y41D4B.16	R09D1.3	R11A8.6		Y82E9BL.3					Y41C4A.1
Y41D4B.17	R09D1.4	R11E3.1		Y82E9BL.7					Y41D4B.16
Y41D4B.18	R09D1.5	R11F4.3		Y82E9BR.22					Y41D4B.18
Y41E3.19	R09E10.1	R11G10.2		Y87G2A.16					Y41D4B.24
Y41E3.2	R09E10.2	R11G10.3		Y92C3B.1					Y41D4B.6
Y41G9A.5	R09E10.3	R11G11.6		Y92H12BR.4					Y41E3.3
Y42A5A.2	R09E10.5	R12A1.3		Y94H6A.10					Y41G9A.3
Y42H9B.1	R09E10.6	R12C12.8		Y94H6A.2					Y41G9A.4
Y43C5A.2	R09H10.5	R12E2.10		Y97E10AL.1					Y42A5A.2
Y43D4A.6	R102.1	R12E2.14		Y97E10B.7					Y42A5A.4
Y43E12A.3	R102.3	R12E2.5		Y9C12A.1					Y42H9B.1
Y43F4A.4	R102.7	R12G8.1		Y9C9A.8					Y43D4A.1
Y43F8A.2	R102.8	R12H7.4		ZC116.2					Y43D4A.2
Y43F8B.12	R105.1	R134.1		ZC132.3					Y43F8A.5
Y43F8B.14	R106.1	R134.2		ZC15.1					Y43F8B.12
Y43F8C.1	R106.2	R13A1.4		ZC15.5					Y43F8B.19
Y43F8C.13	R10D12.1	R13A1.5		ZC15.8					Y43F8B.7
Y43F8C.17	R10D12.11	R13A5.4		ZC155.2					Y43F8C.10
Y43F8C.5	R10D12.6	R13D11.3		ZC155.5					Y43F8C.13
Y44A6B.3	R10E4.7	R13D7.11		ZC190.10					Y43F8C.16
Y45F10B.14	R10E9.2	R13F6.6		ZC190.7					Y43F8C.4
Y45F10D.14	R10E9.3	R13H4.3		ZC190.8					Y44A6E.1
Y45G12C.2	R10F2.1	R13H4.5		ZC196.4					Y45F10B.2
Y46C8AL.2	R10F2.5	R13H4.7		ZC196.6					Y45F10C.2
Y46C8AL.3	R10H1.2	R13H4.8		ZC204.1					Y45F10D.14
Y46C8AL.4	R10H1.5	R148.7		ZC204.15					Y45F10D.2
Y46C8AL.5	R11A5.7	R166.2		ZC239.12					Y45F3A.1
Y46C8AL.8	R11A8.6	R17.3		ZC239.13					Y45G5AM.1
Y46D2A.1	R11A8.8	R186.5		ZC239.14					Y45G5AM.4
Y46D2A.2	R11D1.3	R186.6		ZC239.16					Y45G5AM.6
Y46D2A.3	R11E3.1	R193.2		ZC334.10					Y46C8AL.5
Y46G5A.22	R11F4.2	R57.2		ZC334.11					Y46C8AL.8
Y46G5A.29	R11G10.1	R74.2		ZC334.3					Y46D2A.2
Y47D3A.10	R11G10.2	SSSD1.1		ZC376.2					Y46D2A.3
Y47D3A.12	R11G10.3	T01A4.1		ZC376.8					Y46G5A.24
Y47D3B.1	R11G11.12	T01B10.2		ZC412.6					Y46G5A.29
Y47D7A.13	R11G11.14	T01B11.1		ZC443.1					Y46H3A.2
Y47D7A.16	R12A1.3	T01B11.7		ZC443.5					Y46H3A.3
Y47D7A.5	R12C12.3	T01B7.7		ZC443.6					Y47D3A.6
Y47G6A.30	R12C12.8	T01B7.8		ZC449.4					Y47D3B.1
Y47H9C.1	R12E2.10	T01C2.1		ZC455.10					Y47D7A.11
Y47H9C.10	R12E2.6	T01C3.5		ZC455.6					Y47D7A.12
Y48A6B.7	R12G8.1	T01C4.1		ZC47.14					Y47D7A.2
Y48A6B.9	R12H7.4	T01D1.4		ZC477.7					Y47D7A.5
Y48E1B.15	R134.1	T01D1.8		ZC482.1					Y47D7A.6
Y48G1BR.1	R134.2	T01D3.2		ZC482.2					Y47D7A.7
Y48G8AR.1	R13A1.4	T01D3.6		ZC504.2					Y47D9A.3
Y49E10.16	R13A1.5	T01G5.5		ZC513.12					Y47G6A.15
Y49E10.18	R13A5.4	T01G9.3		ZC581.6					Y47G6A.17
Y49G5A.1	R13A5.9	T01H10.1		ZC8.1					Y47G6A.19
Y4C6B.2	R13D11.3	T01H10.2		ZK105.1					Y47H9B.2
Y4C6B.6	R13D11.6	T01H3.4		ZK105.6					Y47H9C.1
Y50D4B.3	R13D7.2	T02B11.4		ZK1055.2					Y47H9C.12
Y50D4B.4	R13D7.7	T02C12.4		ZK1055.6					Y48B6A.7
Y50E8A.16	R13F6.8	T02D1.5		ZK1098.11					Y48E1B.11
Y51A2D.13	R13H4.3	T02E1.7		ZK121.1					Y48E1B.8
Y51A2D.4	R13H4.7	T02E9.2		ZK1236.5					Y49A3A.2
Y51A2D.8	R13H4.8	T02G5.11		ZK1236.9					Y49E10.9
Y51F10.7	R13H7.2	T02G5.6		ZK1240.9					Y49F6B.13
Y51H4A.10	R13H9.4	T02G6.2		ZK1248.19					Y49F6C.5
Y51H4A.25	R148.1	T02G6.7		ZK1248.4					Y4C6A.2
[truncated: 1,126 more rows]

## Sheet: TableS9B
Tiling arrays
Up-regulated genes WS210				Down-regulated genes WS210
S. marcescens 24h	E. faecalis 24h	P.luminescens 24h		S. marcescens 24h	E. faecalis 24h	P.luminescens 24h
AC3.3	AC3.1	2RSSE.2		AH10.2	B0238.15	AH10.2
AC3.5	AC3.2	AC3.3		AH9.3	B0252.5	B0213.15
AC3.8	AC3.3	AC8.3		B0047.2	B0554.1	B0218.6
B0024.1	AC3.8	AH10.3		B0047.3	B0563.1	B0261.5
B0024.15	AC8.10	AH6.3		B0047.4	B0563.9	B0281.4
B0024.2	AC8.11	AH9.6		B0205.13	C01A2.5	B0302.2
B0024.4	AC8.3	B0024.1		B0205.2	C01H6.3	B0391.5
B0034.2	AC8.4	B0024.14		B0205.5	C04F5.7	B0454.7
B0034.7	AH10.1	B0024.2		B0212.6	C04F6.2	B0554.1
B0035.13	AH10.3	B0024.3		B0213.10	C05D9.5	B0554.3
B0205.14	AH6.6	B0024.4		B0213.15	C05E11.6	B0563.8
B0218.1	AH9.6	B0034.1		B0213.17	C07E3.10	B0563.9
B0238.12	B0019.1	B0034.2		B0218.5	C10E2.4	C02B8.1
B0238.7	B0024.1	B0034.3		B0222.3	C11D2.1	C02E7.8
B0244.10	B0034.3	B0034.7		B0228.6	C17C3.1	C03B8.1
B0244.11	B0034.7	B0198.3		B0240.1	C17E7.12	C03G5.9
B0244.6	B0047.1	B0205.13		B0250.10	C17F4.7	C04F12.9
B0244.7	B0205.10	B0205.14		B0250.2	C18D4.3	C04G2.8
B0261.5	B0205.14	B0205.4		B0250.8	C29F9.5	C04H5.7
B0280.11	B0205.8	B0207.11		B0252.5	C29G2.1	C05E4.3
B0280.4	B0207.11	B0207.12		B0280.7	C31H5.4	C06A5.10
B0280.8	B0207.12	B0207.3		B0284.2	C35D6.3	C07B5.5
B0284.4	B0207.3	B0207.8		B0284.3	C35E7.1	C08B6.1
B0285.10	B0213.16	B0213.17		B0286.1	C35E7.3	C11D2.1
B0285.9	B0213.6	B0213.5		B0286.5	C37A5.8	C17H1.9
B0294.3	B0213.7	B0213.6		B0304.1	C39E9.3	C17H12.3
B0302.5	B0213.9	B0218.1		B0304.6	C40A11.4	C18D4.3
B0303.14	B0218.1	B0218.2		B0334.13	C40H5.1	C18D4.6
B0303.16	B0222.2	B0218.8		B0336.11	C43D7.5	C24B9.9
B0344.2	B0222.3	B0222.1		B0336.12	C43D7.7	C25B8.3
B0365.5	B0222.5	B0222.6		B0348.5	C43D7.8	C27A7.9
B0365.6	B0222.8	B0222.8		B0391.12	C43D7.9	C29E4.14
B0391.4	B0228.4	B0228.4		B0391.5	C44C3.6	C29F9.5
B0393.5	B0228.9	B0238.7		B0399.1	C45B2.2	C30G12.2
B0395.2	B0238.13	B0244.11		B0410.1	C49D10.11	C31E10.4
B0403.5	B0238.7	B0252.2		B0454.8	C52D10.7	C32B5.10
B0416.7	B0238.8	B0252.8		B0454.9	C52D10.8	C32C4.5
B0432.12	B0244.10	B0272.1		B0496.2	C52D10.9	C35D10.14
B0454.2	B0244.11	B0280.12		B0496.7	C54G6.5	C37A5.8
B0462.3	B0244.2	B0285.6		B0496.8	C56G2.5	C38C10.6
B0491.2	B0244.6	B0285.7		B0507.10	D1025.9	C41D7.1
B0491.3	B0244.7	B0285.9		B0507.3	D2030.11	C43D7.8
B0491.8	B0261.6	B0294.1		B0511.1	DC2.7	C44C3.6
B0495.1	B0272.1	B0294.3		B0511.2	EEED8.4	C45B2.1
B0495.4	B0280.13	B0303.14		B0524.3	F01D5.3	C45G7.3
B0496.3	B0280.4	B0303.16		B0554.3	F02C9.1	C45H4.14
B0507.2	B0281.1	B0303.7		B0563.5	F02D10.6	C46G7.5
B0507.9	B0281.3	B0304.3		B0563.9	F07E5.2	C48B4.12
B0524.5	B0284.1	B0310.1		B0564.3	F07F6.7	C49D10.11
B0547.2	B0284.4	B0310.6		C01F1.2	F08D12.10	C52D10.3
B0554.6	B0285.6	B0331.2		C01G10.16	F09E10.1	C54G4.6
BE10.1	B0285.7	B0334.6		C01G12.2	F09E10.7	C54G6.5
BE10.5	B0286.2	B0344.2		C01G12.6	F10G2.4	C56A3.2
C01A2.2	B0304.7	B0348.2		C01G5.4	F11G11.11	C56G2.5
C01B10.1	B0310.6	B0361.4		C01G6.1	F12A10.9	CC8.2
C01B10.10	B0348.1	B0365.5		C01G6.9	F13E9.14	D1025.7
C01B10.6	B0350.3	B0379.2		C01H6.3	F14B6.3	D1025.9
C01B12.1	B0353.1	B0391.9		C02B10.3	F14F9.2	D1044.5
C01B12.3	B0361.4	B0393.5		C02B8.1	F14H3.5	D1086.3
C01C10.3	B0365.5	B0395.2		C02B8.3	F15B10.3	D2024.10
C01F1.5	B0379.6	B0399.1		C02B8.4	F15E6.4	DC2.7
C01F6.2	B0379.7	B0399.2		C02E7.9	F19B10.2	E02C12.11
C01F6.6	B0391.4	B0403.2		C02F12.1	F23B2.13	E03H12.10
C01G10.15	B0391.6	B0403.3		C02F12.10	F26D2.3	EEED8.4
C01G10.19	B0391.9	B0403.5		C02F12.3	F26F4.13	F02E11.3
C01G10.6	B0393.5	B0412.1		C03A7.2	F26G1.10	F02H6.3
C01G12.11	B0395.1	B0412.2		C03A7.4	F31A9.1	F07C4.11
C01G5.9	B0403.5	B0416.1		C03B1.6	F31A9.2	F08B12.5
C01G6.7	B0410.1	B0432.14		C03B8.3	F31E9.6	F08H9.8
C01G8.5	B0412.2	B0454.2		C03C11.1	F36F12.4	F10D11.4
C01H6.4	B0416.7	B0454.6		C03G5.2	F36H12.13	F10D2.9
C01H6.8	B0432.1	B0457.6		C03G6.17	F36H5.9	F11A5.16
C02A12.4	B0432.11	B0478.1		C03G6.6	F37C4.7	F11H8.3
C02B8.2	B0432.14	B0491.2		C03H5.1	F38A3.1	F12E12.7
C02B8.6	B0454.10	B0491.3		C04A11.2	F38A5.12	F13E9.4
C02D5.1	B0454.2	B0491.4		C04C11.1	F38C2.5	F14D7.6
C02D5.3	B0491.3	B0491.8		C04C3.6	F38H4.2	F14F8.8
C02E7.10	B0491.8	B0495.1		C04E12.6	F39B3.3	F15A2.1
C02F5.10	B0495.1	B0495.10		C04F12.3	F41D3.7	F15E11.1
C02F5.11	B0495.10	B0495.4		C04F6.3	F42C5.6	F15E11.12
C02F5.2	B0495.4	B0496.3		C04G2.1	F42F12.8	F15E11.13
C02F5.5	B0496.3	B0496.5		C04H4.1	F43G6.5	F15E11.14
C02F5.8	B0507.10	B0496.7		C05B5.4	F44F1.7	F15E11.15
C02H6.2	B0507.2	B0496.8		C05B5.8	F45C12.5	F15E6.3
C03A7.10	B0507.3	B0507.1		C05D12.7	F45C12.6	F15E6.4
C03A7.9	B0507.6	B0507.10		C05E11.4	F45D11.5	F15E6.8
C03B1.10	B0507.7	B0507.2		C05E11.6	F46F5.6	F16B4.7
C03B8.2	B0507.8	B0507.9		C05E4.13	F46H5.5	F17A9.6
C03D6.1	B0507.9	B0545.1		C05E4.14	F47D12.10	F17C11.5
C03F11.3	B0511.4	B0545.3		C05E4.9	F48F5.3	F19B10.3
C03F11.4	B0513.6	B0554.6		C05G5.5	F49E11.6	F22A3.6
C03G5.13	B0513.9	B0563.2		C06A12.3	F49H12.4	F22F7.7
C03G5.7	B0524.2	B0564.10		C06A5.10	F53B6.9	F23H12.7
C03G5.8	B0524.3	B0564.9		C06A6.7	F53G12.11	F26D10.13
C03G6.12	B0545.3	BE10.2		C06B8.9	F53G2.8	F26D2.3
C03G6.16	B0546.5	C01A2.1		C06E1.1	F54B8.5	F26F2.4
C04C3.4	B0547.2	C01A2.7		C06E1.11	F56A4.2	F28A12.4
C04E6.12	B0554.4	C01B10.1		C06E2.7	F56A6.5	F28D1.3
C04E6.13	B0554.6	C01B10.5		C06E4.4	F56B6.6	F28D1.4
C04F12.8	B0564.3	C01B12.1		C06E8.3	F56C9.5	F28D1.5
C04F5.5	B0564.4	C01B12.3		C06G3.3	F56D6.10	F28G4.1
C04F5.7	BE10.1	C01B4.7		C07A12.2	F56D6.8	F29B9.7
C04G2.5	C01A2.1	C01B4.8		C07A4.2	F56G4.2	F32H5.6
C04G6.10	C01A2.6	C01B7.4		C07B5.2	F56G4.3	F35A5.5
C04H5.8	C01A2.7	C01B7.5		C07D10.6	F57G9.3	F36F12.8
C05A9.1	C01B10.1	C01C10.1		C07G3.10	F58B3.7	F36H12.13
C05B5.3	C01B10.5	C01C10.2		C08B11.5	F58D5.2	F36H12.16
C05B5.6	C01B12.5	C01C4.3		C08B6.2	F59A6.10	F37B4.10
C05B5.9	C01B4.7	C01F1.3		C08D8.2	H25K10.2	F37D6.4
C05C10.3	C01B7.5	C01F1.5		C08E3.5	K02E7.1	F37H8.5
C05C10.4	C01B7.6	C01F4.2		C08E3.6	K02E7.9	F38C2.2
C05C12.3	C01B9.1	C01G10.15		C08E3.7	K03B8.11	F38C2.5
C05C12.4	C01C10.1	C01G10.6		C08E8.2	K04A8.3	F39B3.3
C05C8.7	C01C10.2	C01G12.1		C08F1.10	K04A8.9	F39E9.11
C05D11.10	C01C10.3	C01G12.11		C08F1.6	K05F6.1	F41D3.7
C05D12.3	C01F4.2	C01G12.7		C08F11.12	K05F6.5	F42F12.6
C05D12.4	C01F6.6	C01G6.1		C08G5.4	K07H8.7	F42F12.8
C05D2.3	C01G10.1	C01G6.2		C08H9.12	K08E4.7	F43D2.6
C05D2.4	C01G10.6	C01G6.7		C08H9.13	K08F11.1	F43G6.11
C05D2.8	C01G12.11	C01H6.8		C09B8.5	K10B3.1	F43G6.5
C05D9.2	C01G6.1	C02A12.5		C09E7.3	M01D7.1	F44D12.3
C05D9.4	C01H6.4	C02A12.6		C09F5.3	M01E5.6	F44E7.3
C05E11.5	C01H6.8	C02B4.1		C09G12.6	M03E7.3	F44F1.7
C05E4.4	C02A12.1	C02B4.4		C09H10.8	M116.1	F45C12.11
C05G5.3	C02A12.2	C02B8.5		C09H5.1	M151.8	F45C12.13
C05H8.1	C02A12.8	C02C6.2		C10A4.5	R01B10.2	F45C12.6
C06A8.9	C02B10.6	C02D5.1		C10F3.7	R01E6.5	F45D11.5
C06B3.1	C02B4.1	C02D5.2		C10G8.6	R02C2.1	F45D11.8
C06B3.7	C02B4.4	C02D5.3		C10H11.4	R02F2.6	F45D11.9
C06B8.12	C02B8.3	C02E7.13		C11D2.1	R05D8.11	F46F5.6
C06B8.2	C02B8.5	C02E7.6		C11E4.2	R05H5.3	F49A5.6
C06C3.6	C02B8.6	C02E7.7		C11G10.2	R06A4.6	F49E11.10
C06C6.2	C02C2.4	C02F12.3		C12D12.3	R07B5.4	F53G12.9
C06C6.7	C02D5.2	C02F12.7		C12D5.3	R07C3.2	F55B11.3
C06E1.5	C02D5.3	C02F4.4		C12D8.14	R08B4.5	F55C9.11
C06E1.8	C02E7.1	C02F4.5		C12D8.17	R08C7.9	F55G7.2
C06E2.2	C02E7.10	C02F5.11		C12D8.19	R09B5.10	F56A8.8
C06E2.8	C02E7.7	C02F5.12		C12D8.9	R10D12.7	F56D6.10
C06E4.5	C02E7.9	C02F5.14		C13C4.4	R13H7.1	F56D6.11
C06G3.1	C02F12.3	C02F5.5		C13F10.1	R52.1	F56D6.8
C06G4.6	C02F12.7	C02F5.8		C13G3.2	T01B10.2	F56D6.9
C06G8.3	C02F5.10	C02G6.3		C14A11.2	T02H6.5	F57A10.2
C06H2.1	C02F5.11	C02H6.2		C14A11.7	T04D3.1	F57G4.8
C06H5.1	C02F5.12	C02H7.1		C14A6.7	T04D3.2	F58B3.7
C06H5.2	C02G6.2	C03A3.1		C14B1.3	T05D4.2	F58D5.2
C07A9.11	C02H6.2	C03A7.14		C14B9.1	T05E7.5	F58E1.12
C07A9.8	C02H7.3	C03A7.4		C14C6.9	T05F1.13	F58E1.2
C07D10.1	C03A3.1	C03A7.7		C14E2.1	T05H10.4	F58E2.2
C07D8.5	C03A3.3	C03A7.8		C14E2.3	T09F5.1	F58G6.3
C07E3.10	C03A7.11	C03C10.9		C14F5.1	T10D4.14	F59A7.12
C07E3.3	C03A7.12	C03D6.1		C14F5.2	T11F9.14	F59B2.12
C08B11.4	C03A7.13	C03F11.1		C14H10.4	T11F9.6	F59E11.7
C08B6.11	C03A7.14	C03F11.3		C15A11.2	T17A3.4	F59G1.7
C08B6.3	C03A7.7	C03F11.4		C15A11.4	T19C3.5	H06H21.8
C08C3.1	C03A7.8	C03G5.13		C15A7.2	T20F5.5	H17B01.2
C08E3.14	C03A7.9	C03G5.7		C15B12.3	T22G5.6	H27D07.2
C08E3.15	C03B1.1	C03G6.12		C15F1.7	T23D5.8	H32K16.2
C08F1.11	C03B1.10	C03G6.14		C15H11.2	T24B8.5	H39E23.3
C08F1.4	C03B1.4	C03G6.2		C15H9.11	T26H2.1	K03B8.11
C08F1.5	C03B1.6	C04A11.4		C16A11.7	T27F6.5	K03D3.5
C08F11.13	C03B8.2	C04A11.5		C16C10.2	T28F2.6	K04A8.5
C08F11.17	C03C10.9	C04C3.4		C16C2.1	VC5.1	K04H8.3
C08F11.3	C03D6.1	C04E6.12		C16C8.13	W01B11.1	K05F6.5
C08F11.5	C03F11.1	C04E6.13		C16D9.3	W01B6.4	K06B4.9
C08F11.8	C03F11.4	C04F12.3		C17B7.4	W02H5.1	K07C11.7
C08G5.6	C03G5.7	C04F12.6		C17C3.12	W03H1.2	K07G5.5
C08H9.11	C03G6.12	C04F6.4		C17C3.5	W04E12.3	K08C9.6
C08H9.4	C03G6.14	C04G2.7		C17E7.1	W04H10.1	K08D10.8
C09B7.1	C03G6.15	C04G6.1		C17E7.12	W06H8.7	K08E4.4
C09B8.8	C03G6.17	C04G6.10		C17E7.13	W09G12.1	K08E4.7
C09B9.2	C03G6.2	C04G6.13		C17E7.8	W09H1.4	K09E3.4
C09D4.3	C03G6.5	C04G6.5		C17G10.4	Y102A5C.36	K10C2.6
C09E7.1	C03G6.7	C04G6.6		C17H1.9	Y105C5B.13	K12H6.9
C09E7.6	C03G6.8	C04H5.3		C17H11.5	Y106G6D.1	M01B2.4
C09E8.2	C04A11.5	C05A9.1		C17H12.3	Y116F11A.1	M02H5.9
C09F12.1	C04A2.1	C05B5.3		C18A11.4	Y116F11A.3	M03E7.3
C09G12.10	C04C3.4	C05B5.9		C18A11.5	Y14H12A.2	M163.10
C09G12.17	C04E12.10	C05D11.4		C18B10.2	Y18D10A.26	R02C2.2
C09G12.5	C04E12.11	C05D11.6		C18B12.5	Y19D10A.9	R05H5.3
C09H5.7	C04E12.2	C05D12.1		C18C4.10	Y19D10B.3	R07B5.4
C09H5.9	C04E12.4	C05D12.3		C18D1.1	Y25C1A.6	R08C7.13
C10C5.2	C04E6.12	C05D12.4		C18F10.4	Y26D4A.21	R09B5.1
C10E2.5	C04E6.13	C05D9.2		C18G1.9	Y27F2A.9	R09B5.3
C10G11.1	C04E6.3	C05D9.7		C18H7.1	Y34D9A.6	R09B5.5
C10G11.2	C04E6.4	C05D9.9		C18H7.3	Y39A1A.16	R10D12.7
C11D2.2	C04E7.4	C05E11.3		C23F12.4	Y39G10AL.1	R11G11.14
C11E4.3	C04F12.7	C05E4.4		C23G10.10	Y40B10A.6	R13A1.1
C11E4.7	C04F12.8	C05E4.6		C23G10.11	Y41C4A.16	R52.1
C12C8.2	C04F2.1	C05E7.1		C23H4.8	Y43B11AL.1	R52.4
C12D12.1	C04F2.4	C05E7.2		C24A3.6	Y43F11A.1	T02B5.3
C12D12.5	C04G2.4	C05E7.3		C24A8.5	Y43F11A.4	T03E6.8
C12D5.5	C04G6.1	C05G5.1		C24A8.6	Y45G5AM.4	T04D3.2
C12D5.8	C04G6.10	C05G5.3		C24B9.9	Y45G5AM.5	T05D4.2
C12D8.15	C04G6.5	C05H8.1		C24D10.2	Y46E12A.1	T05E12.6
C12D8.16	C04G6.6	C06A1.6		C24H11.3	Y46E12A.4	T05G5.4
C12D8.4	C04H5.8	C06B3.3		C24H12.10	Y47D7A.1	T06C12.9
C12D8.5	C05B5.1	C06B3.5		C24H12.11	Y47D9A.4	T06H11.2
C13A10.1	C05B5.2	C06B3.7		C24H12.12	Y48C3A.1	T07C4.4
C13A2.11	C05B5.3	C06B3.8		C24H12.6	Y51H7BR.1	T07F10.1
C13D9.1	C05B5.7	C06B8.1		C25A6.1	Y51H7C.1	T07H3.3
C13D9.9	C05B5.9	C06B8.11		C25B8.1	Y54G2A.46	T08A9.12
C14A4.7	C05C12.3	C06C3.12		C25B8.4	Y57G11C.25	T08G5.1
C14B9.3	C05C12.4	C06C6.2		C25D7.15	Y57G7A.2	T08H10.4
C14C10.7	C05D11.4	C06C6.4		C25D7.9	Y59E9AL.5	T09F5.9
C14C11.1	C05D11.5	C06C6.5		C25E10.10	Y59E9AR.9	T10B5.7
C14C11.3	C05D12.1	C06E1.3		C25E10.7	Y5H2B.3	T10D4.14
C14C11.4	C05D12.3	C06E1.4		C25G4.7	Y60A3A.5	T10H9.5
C14C6.2	C05D9.2	C06E1.8		C26E1.2	Y60A9.3	T11F9.14
C14C6.3	C05D9.3	C06E2.8		C26E1.3	Y62H9A.2	T11F9.6
C14C6.5	C05D9.4	C06E2.9		C26F1.2	Y64G10A.10	T13F3.6
C15B12.6	C05D9.9	C06E4.2		C27A7.8	Y65B4A.7	T15B7.3
C15B12.7	C05E4.6	C06E7.4		C27C7.2	Y67D8C.4	T15B7.6
C15C6.2	C05E7.1	C06E8.5		C28A5.4	Y69A2AR.24	T16A1.4
C15C7.5	C05E7.3	C06G1.1		C28C12.8	Y69A2AR.3	T16G1.10
C15C7.7	C05H8.1	C06G1.2		C28H8.6	Y69A2AR.30	T17A3.4
C15C8.1	C06A12.5	C06G1.5		C29E4.14	Y71A12B.11	T19C4.4
C15C8.3	C06A12.8	C06G3.1		C29E4.9	Y71F9AL.6	T20F5.5
C15C8.7	C06A5.2	C06G8.1		C29F5.3	Y71G12B.32	T21C12.4
C15F1.8	C06A6.7	C06H2.5		C29F7.2	Y71G12B.33	T22B7.7
C15H9.3	C06A8.8	C06H5.2		C29F7.7	Y73B6BL.45	T22D1.6
C16A11.8	C06A8.9	C07A12.2		C29F9.10	Y73F8A.36	T22G5.6
C16A3.10	C06B3.10	C07A4.2		C29F9.5	Y75B8A.28	T23D5.3
C16C10.13	C06B3.13	C07A9.11		C29F9.8	Y7A5A.5	T24D5.4
C16C4.17	C06B3.3	C07A9.4		C29G2.1	Y80D3A.3	T26E3.5
C16C8.10	C06B8.1	C07A9.6		C29G2.2	Y82E9BL.5	T26E3.6
C16C8.2	C06B8.11	C07A9.8		C29H12.3	ZC116.1	T26E4.2
C16C8.9	C06B8.2	C07A9.9		C30A5.5	ZC239.20	T26G10.3
C16D9.2	C06B8.6	C07B5.3		C30E1.4	ZC239.21	T27E7.5
C16D9.4	C06C3.3	C07D10.1		C30F2.2	ZK1053.5	T28F2.6
C16H3.1	C06C3.6	C07D10.4		C30F2.3	ZK1240.4	VC5.1
C16H3.2	C06C6.2	C07D8.2		C30F2.5	ZK1290.15	VY10G11R.2
C17B7.3	C06C6.3	C07E3.10		C30G12.4	ZK1307.2	W01B6.4
C17C3.1	C06C6.7	C07E3.3		C30G4.2	ZK1320.1	W02B3.3
C17C3.15	C06E1.6	C07E3.4		C30G4.7	ZK470.4	W02D7.11
C17C3.4	C06E1.8	C07E3.5		C30G7.1	ZK512.4	W02D7.2
C17C3.6	C06E2.9	C07E3.9		C31B8.16	ZK673.5	W02D7.4
C17D12.5	C06E4.2	C07F11.2		C31E10.4	ZK899.6	W03G1.7
C17E4.9	C06E4.3	C07G3.2		C31H2.3	ZK945.4	W03H1.2
C17E7.6	C06E4.7	C07H6.3		C31H5.4		W04A8.5
C17F4.2	C06E7.2	C07H6.7		C32B5.1		W04B5.1
C17F4.7	C06E8.3	C08B6.3		C32B5.15		W04E12.6
C17F4.8	C06G1.5	C08C3.1		C32B5.17		W06D11.2
C17G1.3	C06G3.3	C08E3.1		C32D5.8		W09G12.1
C17G10.5	C06G4.6	C08E3.10		C32E12.5		W09G12.4
C17G10.7	C06G8.1	C08E3.13		C32E8.1		W09H1.4
C17H1.14	C06H2.5	C08E3.15		C33A12.14		W10G11.12
C17H11.4	C06H5.2	C08E3.2		C33A12.4		W10G11.3
C17H12.12	C07A9.11	C08E3.3		C33C12.1		Y106G6D.1
C17H12.6	C07A9.4	C08E3.4		C33D12.3		Y110A2AL.5
C17H12.8	C07A9.6	C08E3.9		C33D12.7		Y111B2A.16
C18A11.3	C07A9.8	C08E8.4		C33D9.10		Y116A8C.17
C18A3.10	C07B5.6	C08F1.11		C33F10.11		Y116A8C.19
C18A3.4	C07D10.1	C08F1.5		C33G8.13		Y116F11A.1
C18A3.9	C07D10.3	C08F11.1		C34D1.4		Y116F11A.3
C18B12.1	C07D10.6	C08F11.17		C34D10.1		Y19D10B.3
C18B2.1	C07D8.2	C08G5.5		C35B1.5		Y19D10B.7
C18B2.5	C07D8.5	C08G5.6		C35B1.8		Y25C1A.6
C18C4.3	C07E3.3	C08G9.1		C35C5.8		Y27F2A.8
C18D4.2	C07E3.4	C08G9.2		C35D10.14		Y27F2A.9
C18D4.5	C07F11.2	C08H9.4		C35D6.3		Y32G9A.12
C18E9.5	C07G1.7	C09B8.4		C35E7.11		Y34F4.2
C18F10.9	C07G3.2	C09B8.8		C35E7.3		Y38A8.1
C18G1.2	C07H6.3	C09B9.1		C35E7.5		Y38H6C.23
C18H7.11	C07H6.7	C09B9.8		C35E7.6		Y39G10AL.1
C18H9.6	C08B11.4	C09D1.1		C35E7.7		Y39H10B.2
C23G10.6	C08B6.1	C09D1.2		C36A4.11		Y40B10A.6
C23H5.1	C08B6.14	C09D4.6		C36B7.1		Y40H7A.11
C23H5.8	C08B6.4	C09E10.2		C36C5.9		Y41C4A.16
C24A1.1	C08C3.1	C09E7.1		C36C9.2		Y42H9AR.2
C24A11.2	C08C3.3	C09E7.3		C36E8.6		Y43F11A.1
C24A11.5	C08E3.1	C09E7.6		C36F7.4		Y45F10C.2
C24D10.5	C08E3.11	C09E8.2		C36H8.2		Y45F10C.6
C24F3.6	C08E3.12	C09E8.3		C37A2.3		Y46H3B.1
C24G6.7	C08E3.13	C09F12.1		C37A5.2		Y48A6B.4
C24G7.1	C08E3.15	C09F5.1		C37A5.4		Y4C6B.6
C24H11.1	C08E3.3	C09F9.2		C37A5.8		Y51B9A.4
C24H11.2	C08E3.8	C09G1.1		C37C3.11		Y51B9A.5
C25A1.15	C08E8.1	C09G1.5		C37C3.6		Y51H4A.32
C25A8.1	C08E8.11	C09G5.3		C37C3.8		Y51H7BR.1
C25B8.5	C08E8.2	C09G5.4		C37H5.4		Y51H7BR.4
C25E10.13	C08F1.11	C09G9.5		C38C3.4		Y51H7C.1
C25E10.3	C08F1.4	C09H5.2		C38D4.7		Y52E8A.2
C25E10.4	C08F1.5	C10A4.3		C38D9.1		Y53F4A.2
C25E10.5	C08F11.1	C10C5.2		C38H2.3		Y54G2A.3
C25F6.6	C08F11.13	C10C5.3		C39B10.3		Y57G11C.25
C25F6.8	C08F11.14	C10C5.5		C39B5.14		Y57G11C.40
C25F9.10	C08F11.3	C10C5.7		C39B5.2		Y57G11C.45
C25F9.12	C08F11.7	C10E2.5		C39B5.9		Y57G7A.2
C25F9.4	C08F11.8	C10F3.2		C39D10.1		Y59E1B.1
C25F9.9	C08F8.9	C10F3.3		C39D10.5		Y59E9AL.5
C25G6.1	C08G5.6	C10F3.4		C39E6.6		Y62H9A.2
C25H3.14	C08G5.7	C10F3.6		C39E9.5		Y65B4A.7
C26B2.3	C08H9.4	C10G11.3		C40A11.10		Y69A2AR.30
C26B9.3	C09B7.1	C10G6.1		C40A11.4		Y69A2AR.5
C26B9.5	C09B9.1	C10G8.5		C40A11.6		Y73B3A.16
C26B9.7	C09B9.4	C10H11.3		C40C9.3		Y73B6BL.45
C26C6.9	C09B9.6	C10H11.6		C40H5.1		Y73F8A.36
C26D10.3	C09B9.7	C11D2.6		C41C4.1		Y77E11A.15
C26D10.7	C09C7.1	C11D9.1		C41D11.1		Y80D3A.3
C26E6.1	C09D1.2	C11E4.2		C41G6.10		Y82E9BL.5
C26F1.1	C09D4.1	C11E4.6		C41G6.11		ZC204.13
C26G2.2	C09E10.2	C11E4.8		C42C1.3		ZC266.2
C27C12.5	C09E7.1	C11G10.1		C42C1.6		ZC334.8
C27C7.3	C09E7.10	C11G10.2		C43D7.8		ZC376.3
C27D6.3	C09E7.5	C11H1.7		C43D7.9		ZK1240.4
C27D6.4	C09F9.2	C11H1.9		C43E11.6		ZK228.8
C27D8.3	C09G1.5	C12C8.1		C43H6.7		ZK39.6
C27F2.7	C09G12.17	C12D12.1		C44B7.6		ZK512.4
C27H5.8	C09G12.5	C12D12.4		C44C1.6		ZK666.4
C28C12.4	C09G9.5	C12D5.4		C45B11.6		ZK666.7
C28H8.11	C09H10.9	C12D5.5		C45B2.2		ZK673.1
C29E4.1	C09H5.1	C12D5.8		C45G7.2		ZK816.5
C29E4.5	C09H5.3	C12D8.16		C45G7.3		ZK892.7
C29E4.7	C09H5.5	C12D8.19		C45G9.1		ZK899.5
C29F3.1	C09H5.6	C13A10.2		C45G9.11		ZK899.6
C29F3.5	C09H6.2	C13A2.11		C45G9.13
C29F3.7	C10A4.1	C13B9.4		C45G9.14
C29F4.1	C10C5.2	C13C12.2		C45G9.4
C29F9.11	C10C5.5	C13C4.3		C45H4.14
C29F9.12	C10C6.7	C13C4.5		C46C2.6
C29F9.3	C10E2.5	C13C4.7		C46E10.10
C29F9.4	C10F3.6	C13D9.1		C46F4.3
C29F9.6	C10G11.3	C13E3.1		C46H11.9
C29G2.3	C10G11.8	C13F10.1		C46H3.2
C30D11.1	C10G11.9	C13G3.1		C47C12.3
C30E1.2	C10G8.5	C13G5.1		C47D12.4
C30E1.7	C10H11.3	C14A11.5		C47E12.9
C30F12.1	C11D2.2	C14A4.12		C47E8.9
C30F12.6	C11D9.1	C14A4.13		C47F8.3
C30F2.4	C11E4.3	C14A4.15		C48E7.7
C30F8.3	C11E4.6	C14A4.9		C49A1.10
C30G12.3	C11E4.8	C14B9.1		C49A1.4
C30G4.5	C11G10.2	C14C11.1		C49D10.11
C30G4.6	C11H1.7	C14C11.8		C49D10.3
C30G7.2	C11H1.9	C14C6.5		C49F8.3
C30H6.1	C12C8.1	C14E2.6		C49G7.5
C31A11.1	C12D12.4	C14F11.2		C50E10.3
C31A11.5	C12D12.5	C14F11.3		C50E3.16
C31H2.2	C12D5.4	C14F11.6		C50E3.8
C31H5.5	C12D5.7	C14F5.3		C50E3.9
C32B5.8	C12D5.8	C14H10.2		C50F2.10
C32D5.2	C12D8.15	C14H10.3		C50F2.8
C32E8.4	C12D8.17	C15A11.1		C50F2.9
C32H11.1	C12D8.19	C15A11.3		C50F4.6
C32H11.10	C12D8.4	C15A11.6		C50F7.1
C32H11.12	C12D8.6	C15A7.2		C50F7.6
C32H11.4	C13A10.1	C15B12.3		C50H2.10
C32H11.5	C13A2.11	C15B12.5		C50H2.5
C32H11.7	C13A2.4	C15B12.6		C52A10.2
C32H11.8	C13A2.5	C15C6.1		C52B11.4
C32H11.9	C13A2.6	C15C6.2		C52B9.3
C33A12.10	C13A2.7	C15C7.4		C52D10.6
C33A12.6	C13B9.4	C15C7.5		C52D10.7
C33A12.7	C13C4.1	C15C7.7		C52D10.8
C33C12.3	C13C4.3	C15C8.1		C52D10.9
C33C12.4	C13C4.5	C15F1.2		C52G5.3
C33C12.5	C13D9.3	C15F1.8		C53A5.8
C33D3.1	C13F10.1	C15H11.13		C53B7.5
C33E10.10	C13G3.1	C15H11.2		C53C11.1
C33F10.9	C14A11.5	C15H7.4		C53D5.3
C33G3.3	C14A4.13	C15H9.11		C53D6.3
C33G8.2	C14A4.6	C15H9.3		C54C8.1
C33G8.3	C14A4.7	C15H9.8		C54C8.12
C33G8.4	C14A6.2	C16B8.3		C54D10.13
C33G8.8	C14A6.6	C16C2.2		C54D2.2
C33G8.9	C14B9.1	C16C4.17		C54F6.12
C33H5.13	C14C10.7	C16C4.6		C54F6.5
C33H5.15	C14C11.1	C16C8.2		C54G4.5
C34B2.11	C14C11.4	C16C8.9		C54G4.6
C34B2.9	C14C11.8	C16D6.2		C55A1.11
C34B7.3	C14C6.12	C16D9.1		C55A1.12
C34C12.6	C14C6.2	C16D9.2		C55B7.12
C34C12.9	C14C6.3	C16D9.4		C56G2.5
C34C6.3	C14E2.4	C16E9.1		CC4.2
C34D1.1	C14E2.6	C16E9.4		CC8.2
C34D1.5	C14F11.3	C16H3.1		D1005.5
C34D4.3	C14F11.5	C17B7.3		D1007.9
C34E10.9	C14F5.3	C17C3.1		D1014.1
C34E7.4	C15A11.1	C17C3.12		D1025.9
C34F11.4	C15B12.1	C17C3.13		D1044.2
C34G6.6	C15B12.2	C17C3.15		D1086.2
C34H4.1	C15B12.3	C17C3.2		D1086.9
C34H4.2	C15B12.5	C17C3.4		D2013.3
C34H4.3	C15B12.6	C17C3.6		D2024.10
C35A11.4	C15B12.8	C17C3.7		D2062.12
C35A5.10	C15B12.9	C17D12.2		D2062.4
C35A5.3	C15C6.2	C17E7.6		D2096.6
C35B1.3	C15C7.5	C17F3.1		DC2.7
C35D10.4	C15C8.1	C17F4.8		E01G4.5
C35D6.10	C15C8.2	C17G1.6		E02C12.4
C35E7.8	C15C8.3	C17G10.6		E02H1.7
C35E7.9	C15C8.7	C17H1.7		E03A3.4
C36A4.1	C15F1.1	C17H12.10		E03H12.5
C36A4.10	C15F1.8	C17H12.6		E03H12.7
C36A4.2	C15H11.10	C17H12.8		E04A4.1
C36A4.3	C15H7.3	C17H12.9		E04F6.13
C36B7.5	C15H7.4	C18A11.1		EEED8.15
C36B7.8	C15H9.11	C18A11.3		EGAP5.1
C36C5.12	C15H9.3	C18A11.7		EGAP9.4
C36C5.5	C16B8.2	C18A3.4		F02A9.1
C36C5.7	C16C10.9	C18A3.6		F02C12.3
C36C5.8	C16C4.10	C18A3.9		F02E11.3
C36E6.8	C16C4.11	C18B10.4		F02E9.2
C37C3.10	C16C4.12	C18B10.5		F07C4.11
C37C3.13	C16C4.15	C18B12.3		F07C4.4
C37C3.3	C16C4.3	C18B2.2		F07D3.2
C38C3.1	C16C4.4	C18B2.3		F07E5.2
C38C3.8	C16C4.5	C18B2.5		F07F6.7
C38C6.6	C16C8.2	C18B2.6		F07H5.2
C38D4.8	C16C8.8	C18C4.10		F08D12.10
C38H2.2	C16C8.9	C18D1.3		F08D12.4
C39B10.6	C16D6.3	C18D11.2		F08D12.7
C39D10.7	C16D9.2	C18D11.6		F08E10.6
C39E9.10	C16D9.4	C18D4.2		F08F1.1
C39E9.3	C16D9.6	C18D4.5		F08F1.5
C39E9.6	C16D9.9	C18E9.7		F08F1.9
C39H7.4	C16E9.1	C18F10.9		F08F3.1
C39H7.7	C16H3.1	C18G1.1		F08F8.5
C40A11.1	C17A2.3	C18G1.6		F08G12.8
C40H1.7	C17B7.10	C18H7.11		F08H9.4
C40H1.9	C17B7.12	C18H7.7		F09A5.4
C41G7.6	C17B7.8	C18H9.5		F09B9.4
C41G7.7	C17B7.9	C18H9.6		F09D12.1
C42D8.5	C17C3.10	C18H9.7		F09E10.6
C43D7.5	C17C3.15	C23F12.1		F09E10.7
C43F9.5	C17C3.4	C23H3.2		F09E5.12
C43G2.3	C17E7.1	C23H3.7		F09E8.8
C43G2.4	C17E7.11	C23H3.9		F09F3.12
C43G2.5	C17E7.5	C23H4.6		F09F7.1
C43H6.8	C17E7.6	C24A11.5		F09F7.6
C44B11.1	C17E7.7	C24A8.4		F09F7.7
C44B12.4	C17F3.1	C24A8.5		F10A3.6
C44B12.9	C17F3.3	C24B5.3		F10D11.4
C44B7.7	C17F4.1	C24D10.7		F10D7.5
C44B7.9	C17G1.6	C24G6.7		F10G2.2
C44C1.3	C17G10.3	C24H10.3		F10G2.4
C44C1.5	C17H1.3	C24H11.8		F10G8.4
C44C10.10	C17H1.4	C24H12.7		F11A5.4
C44C10.11	C17H1.6	C25A1.2		F11A5.9
C44C10.12	C17H1.7	C25B8.4		F11C1.6
C44C10.3	C17H1.8	C25B8.5		F11C3.3
C44C10.6	C17H11.5	C25B8.6		F11D11.10
C44C3.9	C17H12.10	C25D7.2		F11E6.1
C44E4.6	C17H12.9	C25D7.4		F11E6.6
C44H4.5	C18A11.3	C25D7.5		F11F1.6
C44H9.6	C18A3.10	C25E10.11		F12A10.9
C45B11.3	C18A3.4	C25E10.12		F12D9.2
C45B2.1	C18A3.6	C25E10.5		F12E12.3
C45B2.7	C18B10.8	C25E10.8		F12E12.7
C45E5.1	C18B2.6	C25F6.2		F12E12.8
C45G3.4	C18C4.1	C25F6.6		F12F6.10
C45G9.5	C18C4.10	C25F6.7		F13A2.2
C45G9.6	C18C4.3	C25F6.8		F13A7.13
C45G9.7	C18D1.3	C25F9.12		F13A7.3
C45G9.9	C18D11.2	C25F9.5		F13B12.2
C45H4.17	C18D4.5	C25F9.9		F13B9.5
C45H4.2	C18E9.7	C25G6.1		F13C5.2
C45H4.3	C18F10.4	C25G6.3		F13D12.3
C46C11.2	C18F10.8	C26B2.3		F13E9.2
C46C2.3	C18G1.1	C26B2.8		F13H10.1
C46E1.2	C18G1.2	C26B9.3		F13H10.6
C46E10.2	C18G1.3	C26B9.6		F13H8.7
C46G7.1	C18H2.5	C26C6.3		F14B6.1
C46G7.3	C18H7.1	C26D10.5		F14B6.3
C46G7.4	C18H7.10	C26D10.7		F14D12.1
C46H11.10	C18H7.11	C26E1.1		F14D12.5
C47A10.1	C18H7.2	C26F1.1		F14F11.1
C47A10.5	C18H7.4	C26F1.10		F14F8.11
C47A4.1	C18H7.7	C26F1.5		F14F8.8
C47A4.2	C18H9.5	C26F1.6		F14F9.2
C47B2.6	C23F12.1	C26G2.1		F14H12.1
C47B2.8	C23H3.7	C27A2.4		F15A4.13
C47E12.11	C23H3.9	C27A2.8		F15A4.2
C47F8.1	C23H5.2	C27A7.4		F15A8.5
C48B4.1	C23H5.8	C27A7.5		F15B10.3
C48B4.13	C24A1.1	C27B7.7		F15D3.1
C48B4.9	C24A11.2	C27C7.2		F15D4.2
C48D5.1	C24A8.4	C27C7.3		F15D4.5
C48E7.9	C24A8.5	C27C7.4		F15E11.2
C49A9.3	C24B5.1	C27C7.8		F15E6.10
C49A9.4	C24B9.12	C27D6.12		F15E6.3
C49A9.5	C24B9.14	C27D6.4		F15E6.4
C49A9.9	C24B9.3	C27D9.2		F15E6.8
C49C3.11	C24B9.9	C27F2.2		F16B4.7
C49C3.4	C24D10.1	C27H5.1		F16B4.8
C49C3.9	C24D10.7	C27H5.6		F16D3.1
C49C8.2	C24D10.9	C27H5.8		F16G10.2
C49C8.5	C24G6.7	C27H6.1		F16G10.8
C49F5.1	C24H11.2	C27H6.4		F16H6.5
C49F5.7	C24H12.8	C28C12.13		F16H6.7
C49F8.1	C25A8.1	C28C12.4		F17A9.6
C49G7.1	C25B8.4	C28G1.5		F17E9.1
C49G7.12	C25B8.5	C28H8.5		F17E9.2
C50A2.3	C25B8.6	C28H8.6		F17E9.3
C50A2.4	C25D7.12	C29A12.4		F17E9.4
C50B6.4	C25E10.12	C29E4.1		F18A12.2
C50B8.5	C25F6.2	C29E4.5		F18C5.10
C50C3.12	C25F6.7	C29E4.7		F18C5.9
C50D2.1	C25F9.10	C29E4.8		F18E3.7
C50D2.3	C25F9.5	C29E6.1		F18E9.6
C50D2.4	C25G6.1	C29E6.2		F19B10.3
C50E10.10	C25G6.5	C29E6.3		F19B10.9
C50E10.7	C26B2.3	C29F3.2		F19C6.4
C50F4.1	C26B2.4	C29F3.3		F19F10.1
C50F4.9	C26B2.5	C29F3.5		F19G12.1
C50F7.5	C26B2.8	C29F3.7		F19G12.4
C50H11.4	C26B9.6	C29F4.1		F19H6.6
C50H11.7	C26D10.3	C29F5.7		F19H8.3
C50H2.1	C26D10.5	C29F9.12		F20A1.10
C50H2.12	C26D10.6	C29F9.3		F20A1.4
C50H2.13	C26D10.7	C29F9.4		F20A1.8
C52B11.5	C26E1.1	C29G2.2		F20B10.1
C52B9.1	C26E6.1	C29H12.3		F20C5.6
C52B9.2	C26F1.1	C29H12.6		F20D1.10
C52B9.5	C26F1.7	C30A5.10		F20E11.1
C52B9.6	C26G2.1	C30A5.4		F21A10.4
C52D10.1	C27A12.4	C30A5.7		F21C10.10
C52D10.3	C27A2.5	C30D11.1		F21C10.3
C52E2.1	C27A2.8	C30E1.6		F21D12.1
C52E4.5	C27A7.1	C30F12.1		F21E9.2
C53A3.2	C27A7.4	C30F8.3		F21E9.3
C53B4.3	C27A7.5	C30G12.3		F21F8.2
C53B4.7	C27A7.9	C30G7.2		F22B3.9
C53B7.6	C27C12.5	C30H6.1		F22B5.3
C53C11.2	C27C12.6	C30H6.10		F22B5.5
C53D6.11	C27D6.4	C30H6.2		F22D6.1
C54A12.3	C27D8.3	C30H6.5		F22D6.11
C54C6.1	C27D9.2	C31A11.4		F22E5.12
C54C6.5	C27F2.2	C31A11.5		F22F1.1
C54C8.7	C27F2.7	C31B8.12		F22F4.5
C54D1.2	C27H5.1	C31B8.4		F22F7.5
C54D10.1	C27H5.4	C31H2.2		F23B2.13
C54D10.3	C27H5.8	C31H2.4		F23B2.8
C54F6.11	C27H6.1	C31H5.3		F23C8.13
C54F6.14	C28A5.3	C31H5.5		F23C8.3
C54F6.8	C28C12.1	C32B5.1		F23D12.5
C54G10.1	C28C12.13	C32B5.11		F23F1.2
C54G6.3	C28C12.4	C32B5.12		F23F1.4
C55A1.14	C28C12.5	C32B5.6		F23F1.6
C55A6.11	C28C12.8	C32D5.1		F23F12.9
C55A6.12	C28D4.1	C32D5.14		F23H12.7
C55A6.7	C28D4.5	C32D5.2		F23H12.9
C55A6.8	C28F5.1	C32D5.6		F25B4.8
C55B6.5	C28G1.1	C32E12.3		F25E5.9
C55B7.10	C28H8.6	C32E8.7		F25G6.3
C55B7.4	C29E4.7	C32H11.1		F25H5.7
C55C2.2	C29F3.3	C32H11.10		F25H5.8
C55F2.1	C29F4.1	C32H11.11		F25H8.5
C56E10.4	C29F4.2	C32H11.12		F25H8.7
C56E6.2	C29F5.5	C32H11.5		F26A10.1
CC4.3	C29F5.7	C32H11.8		F26B1.7
CD4.1	C29F5.8	C32H11.9		F26D10.12
cTel7X.1	C29F9.6	C33A12.2		F26D12.1
D1005.1	C29G2.2	C33A12.6		F26D2.11
D1007.3	C29G2.3	C33B4.3		F26D2.12
D1009.1	C29H12.3	C33B4.4		F26D2.13
D1014.5	C30A5.4	C33B4.5		F26D2.3
D1022.9	C30A5.7	C33C12.3		F26D2.7
D1025.2	C30B5.7	C33C12.9		F26F12.4
D1025.3	C30E1.3	C33D12.2		F26F12.8
D1037.2	C30F12.1	C33D12.6		F26F2.4
D1037.3	C30F12.3	C33D3.1		F26F2.6
D1044.3	C30G12.3	C33D9.1		F26F4.2
D1046.5	C30G4.3	C33D9.13		F26G1.10
D1053.2	C30G4.4	C33D9.3		F26G1.2
D1053.3	C30G4.5	C33D9.9		F26G5.12
D1053.4	C30G7.2	C33E10.10		F26G5.4
D1054.12	C30H6.2	C33F10.11		F26H11.2
D1054.5	C30H6.3	C33F10.13		F27C1.10
D1079.1	C31A11.4	C33F10.5		F27D9.4
D2007.1	C31B8.1	C33F10.7		F27E11.3
D2013.1	C31B8.12	C33G3.1		F27E5.8
D2023.1	C31B8.4	C33G3.3		F28A12.3
D2030.10	C31C9.1	C33G8.11		F28B4.4
D2045.5	C31C9.3	C33G8.4		F28C10.4
D2062.8	C31C9.8	C33H5.13		F28C12.6
D2063.1	C31G12.3	C34B2.1		F28D1.2
D2085.7	C31H1.2	C34B2.11		F28D1.3
D2092.1	C31H1.6	C34B2.9		F28D1.5
D2096.10	C31H2.4	C34B4.1		F28F5.4
D2096.3	C31H5.1	C34B4.3		F28F8.2
E01A2.7	C31H5.3	C34B7.3		F28F9.2
E01G4.6	C31H5.7	C34C12.6		F28H7.6
E01G6.3	C32A9.1	C34C6.3		F29A7.1
E01H11.1	C32B5.11	C34C6.7		F29A7.4
E02C12.8	C32B5.13	C34D1.1		F29A7.5
E02H4.2	C32B5.3	C34D1.5		F29B9.5
E02H4.7	C32C4.7	C34D4.15		F29B9.7
E02H9.3	C32D5.1	C34D4.2		F29C4.4
E02H9.4	C32D5.14	C34D4.3		F31A9.1
E03H12.9	C32D5.2	C34D4.8		F31A9.2
E04A4.3	C32D5.6	C34E11.3		F31B12.3
E04D5.4	C32D5.7	C34E7.1		F31D4.5
E04D5.5	C32E12.1	C34E7.3		F31D5.3
E04F6.12	C32E12.3	C34E7.4		F31D5.6
E04F6.15	C32E8.4	C34F11.9		F31E8.3
E04F6.7	C32E8.7	C34F6.1		F31F4.13
EEED8.13	C32F10.4	C34F6.10		F32A5.5
EEED8.3	C32H11.11	C34G6.3		F32D1.11
EGAP2.3	C32H11.8	C34G6.6		F32H5.6
F01D4.1	C33A12.13	C34H3.2		F33D11.4
F01D4.2	C33A12.15	C34H4.1		F33D11.8
F01D4.4	C33A12.19	C34H4.2		F33D4.3
F01D4.6	C33A12.2	C34H4.3		F33E2.5
F01D4.7	C33A12.6	C34H4.4		F34D6.7
F01D5.1	C33B4.3	C35A5.10		F34H10.5
F01D5.11	C33B4.4	C35A5.11		F35A5.5
F01D5.2	C33B4.5	C35A5.7		F35B12.8
F01D5.3	C33C12.11	C35A5.9		F35B3.1
F01D5.5	C33C12.3	C35B1.3		F35C5.11
F01D5.6	C33C12.4	C35B1.7		F35C5.12
F01D5.7	C33C12.5	C35D10.12		F35D2.3
F01D5.8	C33D12.2	C35E7.10		F35E2.2
F01F1.14	C33D12.6	C35E7.11		F35E8.1
F01G10.3	C33D3.1	C35E7.2		F35E8.2
F01G10.4	C33D9.1	C36A4.10		F35E8.4
F01G12.2	C33D9.3	C36A4.2		F35F10.2
F01G4.5	C33D9.5	C36A4.3		F35H12.1
F01G4.6	C33D9.9	C36B1.1		F35H12.7
F02D10.1	C33E10.10	C36B7.5		F36A4.2
F02D10.4	C33E10.5	C36B7.8		F36D4.1
F02D10.5	C33F10.11	C36C5.12		F36D4.6
F02D8.4	C33F10.13	C36E8.2		F36F12.2
F02D8.5	C33F10.5	C36E8.4		F36F2.1
F02H6.6	C33F10.9	C36F7.5		F36H1.11
F02H6.7	C33G3.1	C36H8.2		F36H12.13
F07A11.5	C33G8.11	C36H8.3		F36H12.15
F07A5.5	C33G8.2	C37A5.1		F36H12.16
F07B10.1	C33G8.4	C37C3.12		F36H12.5
F07C3.10	C33G8.5	C37C3.3		F36H5.10
F07C3.2	C33H5.13	C37C3.7		F36H5.4
F07C4.2	C34B2.11	C37E2.2		F36H5.6
F07C4.7	C34B2.9	C37H5.1		F36H5.8
F07C6.2	C34B4.1	C37H5.11		F36H5.9
F07E5.1	C34B4.5	C37H5.13		F36H9.4
F07E5.8	C34C12.6	C38C6.3		F37A8.2
F07F6.2	C34C12.7	C38C6.6		F37A8.5
F07F6.5	C34C6.3	C38H2.2		F37B1.1
F07G11.2	C34D1.1	C38H2.3		F37B1.7
F07G11.7	C34D1.3	C39B10.1		F37B4.14
F07G11.8	C34D1.4	C39D10.11		F37C12.10
F07G6.3	C34D1.5	C39E6.2		F37C4.4
F07H5.9	C34D4.15	C39E9.3		F37D6.4
F08A8.1	C34D4.3	C39E9.4		F37E3.3
F08A8.2	C34E11.3	C39E9.7		F38A1.10
F08A8.3	C34E7.1	C39H7.1		F38A5.12
F08A8.4	C34F11.2	C39H7.4		F38A5.7
F08C6.2	C34F11.4	C40A11.3		F38A5.9
F08D12.11	C34F11.5	C40A11.7		F38C2.5
F08D12.12	C34F11.9	C40C9.4		F38C2.7
F08D12.3	C34F6.10	C40C9.5		F38E1.10
F08E10.2	C34F6.6	C40H1.3		F38E1.6
F08F3.3	C34G6.6	C40H1.4		F38E11.1
F08F3.9	C34H3.2	C40H1.8		F38E11.2
F08G2.8	C35A5.11	C41C4.5		F38E9.6
F08G5.5	C35A5.2	C41D11.6		F38G1.3
F08G5.6	C35A5.6	C41D7.2		F38H12.3
F08H9.2	C35A5.7	C41G6.12		F38H4.2
F08H9.5	C35B1.3	C41G7.5		F39B2.6
F08H9.7	C35B1.7	C41G7.6		F39B3.3
F09A5.1	C35C5.8	C42D4.13		F39C12.4
F09B12.1	C35D10.11	C42D4.3		F39F10.3
F09B12.3	C35D10.14	C42D8.5		F39F10.4
F09B12.6	C35D10.15	C42D8.8		F39G3.4
F09C12.2	C35D10.3	C43C3.1		F39H12.4
F09C12.7	C35D6.10	C43E11.5		F40A3.6
F09C6.11	C35E7.10	C43E11.6		F40C5.1
F09C6.13	C35E7.2	C43F9.10		F40D4.3
F09C6.14	C36A4.2	C43F9.11		F40E10.1
F09C6.6	C36A4.3	C43F9.5		F40E10.3
F09C6.8	C36A4.9	C43F9.8		F40E12.1
F09C8.1	C36B1.1	C43G2.2		F40E3.5
F09E5.13	C36B1.10	C43G2.4		F40F4.1
F09E5.4	C36B7.2	C43H6.8		F40G12.5
F09E8.1	C36B7.4	C44B11.1		F40G9.6
F09F3.6	C36B7.8	C44B11.3		F40H6.4
F09F7.5	C36C5.11	C44B11.6		F40H7.2
F09G2.6	C36C5.12	C44B12.4		F40H7.7
F09G2.7	C36C5.15	C44B7.9		F40H7.8
F09G8.8	C36C5.2	C44C10.1		F41C3.1
F10A3.11	C36C9.5	C44C10.10		F41C3.3
F10A3.3	C36H8.2	C44C10.5		F41C3.6
F10C1.7	C36H8.3	C44C8.7		F41C3.7
F10C1.8	C37A5.1	C44E12.3		F41C6.2
F10C1.9	C37C3.12	C44E4.6		F41D3.7
F10D11.6	C37C3.13	C44F1.1		F41E6.15
F10D2.10	C37C3.3	C44F1.5		F41G3.17
F10D2.11	C37H5.13	C44H4.1		F41G3.20
F10D2.2	C37H5.6	C44H4.2		F41G4.1
F10D2.4	C38C3.6	C44H4.3		F41G4.5
F10D2.9	C38C3.7	C44H4.4		F41G4.8
F10E7.1	C38C3.8	C44H4.8		F41H10.9
F10E9.10	C38C6.2	C44H9.8		F42A10.4
F10E9.2	C38D4.8	C45B11.3		F42A10.7
F10F2.2	C38D9.5	C45B11.6		F42A6.2
F10F2.5	C38D9.8	C45B2.2		F42C5.5
F10F2.6	C38H2.1	C45B2.7		F42C5.6
F10G2.3	C39B10.4	C45E1.4		F42D1.4
F10G8.1	C39B5.1	C45E5.4		F42E11.1
F11A5.7	C39B5.10	C45G7.4		F42F12.7
F11A6.2	C39B5.11	C45G7.5		F42F12.8
F11C1.3	C39B5.12	C45G9.13		F42G2.6
F11C7.5	C39D10.11	C45G9.6		F42G8.7
F11D5.6	C39E6.2	C45G9.7		F42G9.9
F11E6.2	C39E6.4	C45G9.9		F43C1.7
F11E6.5	C39E9.6	C45H4.3		F43C11.7
F11E6.9	C39E9.7	C46A5.3		F43C11.8
F11F1.1	C39H7.1	C46C11.3		F43C11.9
F11F1.8	C39H7.4	C46E1.2		F43D2.4
F11G11.10	C40A11.1	C46E10.2		F43D2.6
F11G11.12	C40A11.7	C46F11.6		F43E12.1
F11G11.3	C40C9.3	C46G7.3		F43G6.5
F11G11.4	C40C9.5	C46H11.10		F44A2.5
F12A10.5	C40D2.2	C46H11.11		F44A6.4
F12A10.6	C40H1.3	C46H11.7		F44A6.5
F12E12.6	C40H1.8	C46H11.8		F44B9.2
F12F6.9	C40H1.9	C46H11.9		F44C8.3
F13A2.4	C40H5.2	C47A10.3		F44D12.7
F13A7.7	C40H5.4	C47A10.7		F44E5.4
F13B10.1	C40H5.7	C47A4.3		F44E7.3
F13B12.7	C41A3.2	C47B2.6		F44F1.5
F13B6.1	C41C4.10	C47B2.8		F44F1.6
F13B6.3	C41D11.1	C47D2.1		F45C12.13
F13C5.5	C41D11.6	C47D2.2		F45C12.4
F13D12.6	C41G6.14	C47E12.14		F45C12.5
F13D12.8	C41G6.15	C47E12.6		F45C12.6
F13D12.9	C41G7.6	C47E8.3		F45C12.7
F13D2.3	C41G7.7	C47E8.7		F45D11.10
F13E6.5	C41H7.7	C47F8.1		F45D11.5
F13E9.15	C42C1.7	C47F8.4		F45D11.8
F13E9.16	C42C1.9	C48A7.1		F45D3.4
F13E9.4	C42D8.5	C48B4.1		F45E1.2
F13E9.8	C42D8.8	C48B4.3		F46A8.6
F13H8.1	C42D8.9	C48D1.3		F46A8.7
F13H8.11	C43C3.1	C48D5.1		F46B3.15
F13H8.12	C43E11.6	C48D5.2		F46C5.1
F13H8.4	C43F9.5	C48D5.3		F46C5.10
F13H8.5	C43F9.6	C48E7.6		F46C8.1
F14B8.5	C43F9.9	C49A1.10		F46F11.5
F14B8.6	C43G2.4	C49A9.5		F46F5.6
F14D7.1	C43H6.6	C49A9.7		F46H5.3
F14D7.10	C43H6.8	C49A9.8		F46H5.5
F14D7.7	C44B11.1	C49C3.9		F47B3.2
F14E5.1	C44B11.3	C49C8.2		F47B8.8
F14F4.1	C44B12.4	C49C8.5		F47C10.1
F14F8.10	C44B12.9	C49D10.7		F47C10.6
F14F9.6	C44B7.3	C49F8.3		F47C10.7
F14H12.7	C44B7.4	C49G7.10		F47C12.1
F14H3.11	C44B7.9	C49G7.11		F47C12.10
F14H3.12	C44B9.6	C49G7.12		F47D12.10
F14H8.5	C44C1.3	C49G7.3		F47F2.2
F15A2.2	C44C1.5	C49G7.4		F47G4.6
F15A2.5	C44C1.6	C49G7.5		F47G6.2
F15A2.6	C44C10.11	C49G7.6		F47H4.1
F15A8.1	C44C10.6	C50B6.12		F47H4.2
F15B9.6	C44C10.7	C50B6.14		F48A11.1
F15D3.3	C44C10.9	C50B6.4		F48A11.4
F15E11.1	C44C3.1	C50B6.7		F48B9.2
F15E11.11	C44C8.6	C50B8.4		F48B9.3
F15E11.13	C44C8.7	C50B8.5		F48C11.3
F15E11.14	C44C8.9	C50B8.6		F48E3.8
F15E11.15	C44E4.6	C50C10.4		F48F5.2
F15G9.6	C44F1.2	C50C3.12		F48F5.3
F15H10.5	C44F1.5	C50C3.5		F48G7.10
F16B12.1	C44H4.2	C50C3.9		F49A5.10
F16B4.5	C44H4.4	C50D2.1		F49A5.5
F16B4.6	C44H4.5	C50D2.2		F49A5.6
F16F9.2	C44H9.1	C50D2.4		F49A5.9
F16F9.3	C44H9.2	C50E3.14		F49C5.6
F16G10.5	C44H9.8	C50E3.6		F49C5.7
F16G10.6	C45B11.3	C50F2.5		F49E11.10
F16G10.7	C45B2.3	C50F2.6		F49E11.11
F16H6.2	C45B2.5	C50F4.9		F49H12.4
F16H9.2	C45B2.7	C50F7.5		F52B11.5
F17A2.10	C45E1.4	C50H11.4		F52B11.6
F17A2.11	C45E5.1	C50H11.8		F52C12.5
F17A2.3	C45E5.3	C50H2.2		F52F12.5
F17A9.3	C45E5.4	C51E3.10		F52G3.4
F17B5.4	C45G3.4	C51E3.7		F52H3.3
F17C11.12	C45G7.1	C51E3.8		F52H3.7
F17C11.13	C45G7.2	C52A10.1		F53A2.4
F17C11.3	C45G7.3	C52A11.4		F53B2.6
F17C8.2	C45G9.6	C52B9.1		F53B6.9
F17E9.5	C45G9.9	C52B9.10		F53B7.7
F18C12.4	C45H4.10	C52B9.6		F53C3.11
F18E2.1	C45H4.15	C52B9.9		F53C3.3
F18E2.6	C46A5.3	C52E12.2		F53C3.5
F18E3.11	C46C11.4	C52E2.1		F53C3.6
F18E9.4	C46C2.3	C52E4.7		F53F10.1
F18E9.7	C46C2.4	C52G5.2		F53G12.11
F18F11.4	C46E1.2	C53A3.3		F53G12.4
F18F11.5	C46E10.2	C53A5.13		F53G12.9
F19B2.5	C46E10.8	C53A5.5		F53G2.2
F19B6.3	C46G7.3	C53B4.7		F53H4.4
F19C6.5	C46H11.10	C53B4.8		F54A5.3
F19C7.1	C46H11.2	C53B7.1		F54B11.5
F19C7.2	C46H11.6	C53B7.6		F54B11.8
F19C7.4	C46H11.7	C53C11.3		F54B8.8
F19C7.5	C47A10.1	C53C7.3		F54C8.1
F19C7.6	C47A10.11	C53C9.2		F54D10.6
F19C7.7	C47A10.3	C53D5.2		F54D12.3
F19F10.8	C47A10.5	C53D5.3		F54D8.1
F19H8.2	C47A10.7	C53D6.11		F54E7.5
F19H8.5	C47B2.1	C54A12.1		F54F2.6
F20A1.1	C47D12.3	C54A12.2		F55A12.4
F20B6.2	C47E12.10	C54A12.3		F55A4.10
F20B6.4	C47E12.11	C54C6.1		F55A4.8
F20B6.7	C47E12.12	C54C6.2		F55A8.1
F20B6.9	C47E8.6	C54C6.7		F55C12.2
F20D12.6	C47E8.7	C54C8.12		F55C12.6
F20D6.9	C47E8.9	C54C8.4		F55C5.6
F20E11.6	C47F8.1	C54C8.7		F55C7.2
F20G2.1	C47F8.4	C54C8.9		F55C9.10
F20G2.5	C47G2.2	C54D1.2		F55C9.11
F21A3.1	C48A7.1	C54D1.4		F55C9.12
F21C10.11	C48B4.1	C54D1.6		F55E10.5
F21C10.4	C48B4.3	C54D1.7		F55F1.1
F21C10.8	C48B4.8	C54D10.10		F55H12.2
F21D5.3	C48B6.8	C54D10.12		F56A11.3
F21D5.4	C48D5.1	C54D10.14		F56A12.1
F21D9.8	C48E7.5	C54D10.3		F56A8.6
F21F8.1	C48E7.6	C54D10.5		F56A8.8
F21F8.11	C48E7.9	C54D10.8		F56C11.6
F21F8.3	C49A9.3	C54D2.1		F56C3.10
F21F8.4	C49A9.4	C54D2.2		F56D2.3
F21F8.6	C49A9.5	C54D2.5		F56D6.10
F21G4.1	C49A9.7	C54E10.6		F56D6.11
F21H12.3	C49A9.8	C54E4.3		F56D6.7
F21H12.7	C49A9.9	C54F6.10		F56D6.8
F21H7.1	C49C3.10	C54F6.15		F56D6.9
F21H7.4	C49C3.2	C54F6.8		F56F3.4
F22A3.1	C49C3.4	C54G10.1		F56F3.6
F22A3.6	C49C8.5	C54G4.4		F57C12.2
F22B3.10	C49F5.1	C54G4.5		F57C9.2
F22B7.4	C49F5.4	C54G6.3		F57G12.2
F22B8.1	C49F8.1	C54G7.3		F57G4.4
F22B8.3	C49F8.3	C55A1.11		F57G4.8
F22D6.15	C49G7.1	C55A1.3		F57G8.3
F22E10.1	C49G7.11	C55A1.4		F57G9.3
F22E10.2	C49G7.12	C55A1.7		F57G9.4
F22E5.1	C49G7.2	C55A1.9		F58A3.3
F22E5.2	C49G7.3	C55A6.11		F58B3.9
F22F4.1	C49G7.4	C55A6.12		F58B4.4
F22F4.4	C49G7.8	C55A6.5		F58D5.2
F22F7.1	C50A2.3	C55A6.6		F58E1.10
F22F7.2	C50B6.12	C55B7.10		F58E1.12
F22G12.2	C50B6.7	C55C2.5		F58E1.7
F22G12.7	C50B8.4	C55C3.1		F58E2.3
F22G12.8	C50B8.5	C55C3.6		F58E6.3
F22H10.1	C50B8.6	C55H1.2		F58E6.8
F22H10.3	C50C10.3	C56A3.3		F58F6.2
F22H10.4	C50C10.7	C56A3.7		F58F6.3
F23A7.3	C50C10.8	C56C10.4		F58F6.5
F23B12.9	C50C3.12	C56E10.3		F58G4.3
F23B2.12	C50C3.2	C56E10.4		F58H1.4
F23D12.11	C50D2.1	C56G2.4		F58H7.5
F23F12.3	C50D2.4	C56G2.9		F59A1.14
F23H12.5	C50E10.1	C56G3.1		F59A6.10
F25A2.1	C50F2.5	CC8.1		F59A6.11
F25C8.2	C50F4.10	D1005.2		F59A7.11
F25D1.2	C50F7.10	D1005.3		F59A7.12
F25D7.3	C50H11.15	D1007.19		F59A7.7
F25E2.4	C50H11.4	D1007.3		F59B1.10
F25E2.5	C50H2.12	D1009.3		F59D6.1
F25E5.13	C50H2.2	D1014.2		F59D6.3
F25E5.4	C50H2.4	D1014.5		F59E11.7
F25E5.7	C50H2.6	D1022.6		F59H6.8
F25G6.8	C51E3.7	D1022.8		H02I12.3
F25H2.11	C51E3.8	D1044.2		H03G16.4
F25H8.3	C52A11.4	D1046.5		H05B21.2
F25H8.6	C52B11.4	D1053.3		H05L03.3
F26A1.10	C52B9.1	D1054.12		H06I04.5
F26A1.6	C52B9.2	D1054.5		H08J11.2
F26A1.8	C52B9.9	D1054.9		H09F14.1
F26B1.4	C52E12.2	D1069.2		H09G03.2
F26B1.6	C52E2.1	D1073.1		H09I01.1
F26C11.4	C52E2.6	D1079.1		H10D18.4
F26D10.3	C52E2.7	D1081.11		H10D18.6
F26D10.8	C52E2.8	D1081.2		H12D21.13
F26D11.10	C52E4.7	D2005.2		H12I19.1
F26D11.9	C53A5.4	D2023.3		H13N06.7
F26D2.1	C53A5.9	D2024.4		H17B01.5
F26D2.4	C53B4.3	D2062.5		H23L24.5
F26E4.9	C53B4.7	D2062.8		H23N18.5
F26F2.1	C53B7.6	D2063.1		H24K24.3
F26G1.4	C53C11.2	D2089.4		H32K16.2
F26G1.9	C53C11.3	D2092.4		H35N09.2
F27B3.6	C53C7.3	D2092.8		H39E23.2
F27C1.1	C53C9.2	D2096.10		H39E23.3
F27C1.8	C53D5.3	DC2.2		K01A11.1
F27C8.1	C53D6.11	DC2.5		K01A12.2
F27C8.4	C53D6.8	DH11.4		K01A2.9
F27D9.6	C54A12.4	DH11.5		K01D12.1
F27E5.3	C54C8.12	E01A2.3		K02A2.3
F28A12.1	C54C8.2	E01A2.7		K02A6.2
F28A12.4	C54C8.7	E01G4.6		K02A6.3
F28B12.2	C54C8.9	E01G6.1		K02B12.2
F28B4.3	C54D1.1	E02A10.4		K02B12.4
F28C12.7	C54D1.4	E02C12.8		K02B7.4
F28C6.10	C54D1.7	E02C12.9		K02E10.1
F28C6.9	C54D10.10	E02H4.1		K02E7.1
F28D1.9	C54D10.12	E02H9.4		K02E7.12
F28E10.4	C54D10.14	E03A3.6		K02E7.5
F28E10.5	C54D10.3	E03D2.1		K02E7.9
F28F8.3	C54D2.4	E03G2.3		K03A1.4
F28H6.8	C54E10.2	E03G2.4		K03B8.1
F28H7.3	C54E10.5	E03H12.5		K03B8.11
F28H7.7	C54E10.6	E03H4.10		K03D10.1
F29C12.1	C54E4.3	E03H4.12		K03D3.2
F29C4.4	C54F6.10	E03H4.3		K03D3.5
F29D10.1	C54F6.11	E03H4.7		K03E6.3
F29F11.5	C54F6.3	E03H4.8		K03H1.3
F29G6.3	C54F6.8	E04D5.3		K04A8.9
F30A10.11	C54G4.2	E04F6.12		K04B12.2
F30A10.12	C54G4.3	E04F6.2		K04F1.10
F30A10.2	C54G4.4	E04F6.4		K04F1.7
F30B5.1	C54G4.5	E04F6.6		K04F10.2
F30F8.2	C54G6.2	EGAP1.1		K04H4.1
F31A3.4	C54G6.3	EGAP1.3		K04H4.2
F31B9.1	C54G7.3	EGAP2.3		K05B2.3
F31D4.8	C55A1.11	EGAP4.1		K05C4.8
F31D5.5	C55A1.14	EGAP7.1		K05C4.9
F31E3.2	C55A1.3	EGAP798.1		K05F6.5
F31F4.11	C55A1.7	F01D4.2		K05F6.7
F32A5.3	C55A6.12	F01D4.4		K05F6.9
F32A6.4	C55A6.5	F01D4.6		K06A1.3
F32A7.3	C55B7.10	F01D5.1		K06A9.2
F32B4.2	C55C2.5	F01D5.10		K06B4.11
F32B5.1	C55C3.1	F01D5.3		K06B4.9
F32B5.3	C55C3.8	F01D5.5		K06C4.6
F32B5.7	C56A3.2	F01D5.6		K06C4.7
F32B6.4	C56A3.3	F01D5.8		K07A1.5
F32B6.6	C56A3.7	F01E11.1		K07C11.5
F32B6.7	C56E10.1	F01E11.3		K07C6.5
F32D1.4	C56E10.3	F01E11.5		K07C6.8
F32D8.13	C56E10.4	F01F1.13		K07D4.4
F32D8.3	C56G3.1	F01G10.10		K07F5.11
F32D8.6	CC8.1	F01G10.3		K07F5.4
F32D8.7	cTel54X.1	F01G10.4		K07G5.5
F32E10.3	D1005.3	F01G10.5		K08B4.2
F32G8.3	D1005.6	F01G10.6		K08C7.5
F32G8.4	D1007.13	F01G10.8		K08E4.4
F32G8.5	D1007.3	F01G10.9		K08E4.7
F32H5.1	D1009.3	F02C12.2		K08F11.1
F33A8.10	D1009.4	F02C12.5		K08F4.11
F33A8.2	D1022.2	F02C9.4		K08F4.5
F33D11.1	D1022.3	F02D10.1		K08H2.1
F33D11.3	D1022.4	F02D8.1		K09A11.5
F33D4.1	D1022.9	F02E8.6		K09C4.4
F33D4.2	D1025.4	F02E9.3		K09C6.10
F33D4.6	D1037.3	F02G3.1		K09C8.8
F33E2.7	D1044.2	F07A5.5		K09E4.4
F33H1.6	D1044.8	F07B7.1		K09H9.3
F33H12.5	D1053.4	F07B7.13		K10B4.4
F35B12.7	D1054.5	F07B7.14		K10C2.6
F35C11.3	D1054.9	F07C3.2		K10C2.7
F35C12.3	D1073.1	F07C3.8		K10C9.3
F35C5.5	D1079.1	F07C4.3		K10D6.3
F35C5.6	D1081.2	F07C4.4		K10G4.2
F35C5.8	D2005.2	F07C4.5		K10G6.5
F35C5.9	D2007.3	F07C4.8		K10H10.7
F35D11.7	D2023.1	F07C6.2		K11C4.5
F35E12.10	D2023.3	F07C6.6		K11D12.4
F35E12.5	D2024.2	F07E5.4		K11G9.6
F35E12.7	D2062.1	F07E5.7		K11H12.1
F35E12.8	D2062.2	F07E5.8		K11H12.6
F35E8.11	D2062.5	F07E5.9		K11H12.9
F35E8.6	D2063.1	F07F6.5		K12C11.5
F35F10.4	D2096.10	F07G11.7		K12F2.1
F35G12.7	D2096.6	F07G11.8		K12G11.3
F35G2.5	DH11.2	F07G6.5		K12G11.6
F35G8.2	DH11.4	F07G6.7		K12H6.1
F35H8.4	DH11.5	F07G6.8		K12H6.11
F36A2.12	DY3.5	F07G6.9		K12H6.3
F36A4.11	E_BE45912.2	F08A10.1		K12H6.5
F36A4.5	E01A2.7	F08A8.1		K12H6.6
F36A4.6	E01G4.6	F08A8.2		M01A12.4
F36D1.1	E01G6.3	F08B1.1		M01D7.1
F36D1.10	E01H11.1	F08B12.1		M01E5.6
F36D1.4	E02C12.10	F08B4.2		M01G12.12
F36D1.5	E02C12.12	F08C6.1		M01G12.7
F36D3.2	E02C12.6	F08C6.4		M02B7.3
F36D3.4	E02C12.8	F08D12.11		M02E1.2
F36D4.7	E02H4.7	F08D12.3		M02H5.12
F36F12.7	E02H9.2	F08D12.7		M03B6.4
F36F2.5	E02H9.4	F08E10.1		M03B6.5
F36G9.12	E02H9.8	F08E10.2		M03D4.4
F36G9.14	E03A3.4	F08E10.3		M03E7.3
F36H1.5	E03A3.6	F08E10.7		M04D8.6
F36H12.10	E03D2.2	F08F1.6		M05B5.1
F36H12.11	E03H12.2	F08F3.10		M05B5.3
F36H12.7	E03H12.6	F08F3.4		M116.1
F36H2.5	E03H12.9	F08F3.8		M116.2
F36H5.1	E03H4.11	F08F8.1		M142.1
F36H5.2	E03H4.7	F08F8.5		M162.1
F36H9.1	E03H4.8	F08G12.1		M162.5
F36H9.7	E04D5.5	F08G12.8		M163.3
F36H9.8	E04F6.7	F08G2.5		M60.4
F37A4.5	EEED8.11	F08G2.8		M60.7
F37A8.1	EGAP2.3	F08G5.3		M79.4
F37B1.8	EGAP7.1	F08G5.4		R01E6.5
F37B4.7	EGAP798.1	F08G5.6		R02C2.2
F37C4.6	EGAP9.3	F08H9.3		R02C2.6
F37D6.6	F01D4.4	F09A5.2		R02D5.1
F38A1.1	F01D4.6	F09B12.1		R02E12.6
F38A1.13	F01D4.7	F09B12.6		R02F11.3
F38A1.5	F01D5.7	F09B9.4		R02F2.4
F38A5.3	F01E11.3	F09C12.1		R02F2.8
F38A6.4	F01F1.13	F09C12.2		R03A10.2
F38B6.4	F01G10.5	F09C12.7		R03C1.3
F38B6.5	F01G10.7	F09C3.1		R03D7.5
F38B7.7	F02C12.2	F09C3.2		R03E1.4
F38E1.8	F02D10.1	F09C6.12		R03G5.1
F38E11.3	F02D10.2	F09C6.2		R04B5.5
F38H12.2	F02D10.7	F09C6.9		R04E5.9
F39C12.2	F02E11.4	F09C8.1		R05D7.1
F39C12.3	F02E8.2	F09E5.13		R05D8.10
F39D8.3	F02G3.1	F09E5.7		R05D8.11
F39E9.1	F07A5.4	F09E8.6		R05G6.12
F39E9.2	F07A5.5	F09E8.7		R05H10.1
F39E9.6	F07B7.1	F09F3.6		R05H10.7
F39E9.7	F07B7.13	F09F7.5		R06A4.10
F40C5.2	F07B7.14	F09F7.8		R06B10.7
F40D4.11	F07B7.2	F09F9.2		R06B9.1
F40E10.2	F07C3.2	F09F9.4		R06C1.6
F40F4.6	F07C3.7	F09G2.5		R06F6.7
F40F8.12	F07C4.10	F09G2.6		R07B1.2
F40F8.5	F07C4.12	F09G8.6		R07B5.4
F40F8.7	F07C4.2	F09G8.8		R07C12.1
F40G12.6	F07C4.3	F10A3.1		R07C3.8
F40G12.7	F07C4.5	F10A3.11		R07E5.11
F40G12.8	F07C6.2	F10A3.3		R07G3.2
F41A4.1	F07C6.6	F10B5.4		R07H5.7
F41B4.2	F07G11.8	F10C1.7		R08A2.4
F41B5.2	F07G6.7	F10C1.8		R08A2.5
F41B5.3	F07G6.9	F10C2.3		R08B4.3
F41B5.4	F07H5.13	F10D11.6		R08C7.13
F41B5.7	F07H5.6	F10D2.10		R08C7.9
F41C6.5	F07H5.8	F10D2.11		R09B5.1
F41C6.6	F07H5.9	F10D2.12		R09B5.10
F41C6.7	F08A10.1	F10D2.2		R09B5.13
F41D3.2	F08A8.6	F10D2.5		R09B5.3
F41E7.8	F08B1.1	F10D2.6		R09B5.5
F41F3.3	F08B12.4	F10D2.7		R09D1.14
F41G3.11	F08B4.4	F10D7.3		R09D1.8
F41G3.5	F08C6.1	F10E7.10		R09F10.9
F41G4.3	F08D12.3	F10E7.9		R10D12.10
F41H10.12	F08D12.7	F10E9.1		R10D12.7
F41H10.7	F08E10.2	F10E9.12		R10E4.2
F41H10.8	F08E10.3	F10E9.2		R10E4.7
F41H8.2	F08F3.9	F10F2.3		R10E8.2
F41H8.4	F08G12.1	F10F2.4		R10E9.3
F42A10.6	F08G12.8	F10G2.7		R10F2.5
F42A10.8	F08G2.6	F10G7.12		R10H10.4
F42A10.9	F08G5.3	F10G7.6		R11A5.3
F42A9.6	F08H9.2	F10G8.5		R11A5.6
F42C5.10	F08H9.7	F11A1.2		R11F4.3
F42C5.7	F08H9.9	F11A5.3		R11G11.14
F42D1.2	F09A5.1	F11A5.6		R11H6.4
F42E11.3	F09A5.4	F11A5.7		R12A1.2
F42E8.2	F09B12.1	F11A6.2		R12B2.8
F42F12.10	F09C12.1	F11C1.3		R12E2.6
F42F12.11	F09C12.7	F11C1.4		R12G8.1
F42F12.4	F09C3.2	F11C1.6		R13A1.1
F42G2.2	F09C6.1	F11C7.7		R13A1.9
F42G2.5	F09C6.11	F11D11.3		R13A5.6
F42G4.5	F09C6.13	F11D11.4		R13H7.1
F42G9.4	F09C6.8	F11D5.1		R151.1
F42G9.5	F09C6.9	F11D5.3		R52.6
F43C11.12	F09E5.13	F11E6.8		R53.8
F43C11.3	F09E5.16	F11E6.9		T01B11.1
F43C11.4	F09E5.4	F11F1.8		T01B6.1
F43C9.1	F09E5.7	F11G11.1		T01C3.11
F43D2.2	F09E8.8	F11G11.10		T01C3.7
F43D2.6	F09F3.1	F11G11.12		T01C4.3
F43E2.11	F09F3.2	F11G11.9		T01D3.3
F43E2.5	F09F3.6	F11H8.2		T01G6.1
F43H9.2	F09F9.4	F12A10.5		T01G9.1
F44A2.4	F09G2.3	F12A10.7		T02B5.2
F44B9.1	F09G2.6	F12B6.1		T02E1.7
F44B9.4	F09G8.8	F12E12.5		T02H6.5
F44C4.5	F10A3.4	F12F3.1		T02H6.7
F44C8.1	F10A3.5	F12F6.9		T02H6.8
F44C8.8	F10C1.7	F13A2.9		T03E6.8
F44C8.9	F10C1.8	F13A7.11		T03F1.5
F44D12.10	F10C1.9	F13A7.2		T03G11.10
F44D12.4	F10C2.3	F13A7.7		T04A11.4
F44D12.5	F10D11.5	F13B10.1		T04A8.3
F44E2.4	F10D2.5	F13B12.4		T04A8.4
F44E7.5	F10D2.8	F13B6.1		T04B8.2
F44E7.8	F10E7.3	F13B6.2		T04B8.3
F44F4.10	F10E7.9	F13B6.3		T04C12.11
F44G3.10	F10E9.1	F13B9.2		T04C12.3
F44G3.6	F10E9.12	F13B9.6		T04C12.7
F45B8.4	F10E9.2	F13C5.5		T04C9.3
F45C12.1	F10F2.5	F13C5.6		T04C9.4
F45D11.14	F10F2.6	F13D11.2		T04D3.2
F45D11.16	F10G2.3	F13D11.4		T05A10.5
F45D3.1	F10G8.2	F13D12.9		T05A7.4
F45E1.3	F10G8.5	F13D2.1		T05A8.3
F45E1.4	F11A5.13	F13E6.6		T05A8.5
F45E10.1	F11A5.2	F13E9.11		T05B11.7
F45E4.1	F11A5.3	F13E9.15		T05B4.11
F45E4.5	F11A5.5	F13G11.1		T05B4.12
F45E4.8	F11A5.6	F13G3.1		T05C1.5
F45F2.5	F11C1.3	F13G3.3		T05D4.2
F46A8.10	F11C1.6	F13H10.5		T05E12.3
F46B3.11	F11C7.5	F13H10.9		T05E12.4
F46B3.4	F11D11.10	F13H6.1		T05F1.13
F46B3.7	F11D5.1	F13H6.3		T05F1.7
F46B6.10	F11D5.5	F13H6.5		T05G5.10
F46C3.2	F11D5.6	F13H8.1		T05G5.11
F46C3.3	F11E6.1	F13H8.4		T05G5.12
F46C8.6	F11E6.2	F13H8.5		T05H10.3
F46E10.1	F11E6.3	F14A5.1		T05H10.4
F46F5.15	F11E6.4	F14B6.2		T05H4.10
F46F5.8	F11E6.5	F14B8.5		T06A1.4
F46G10.1	F11E6.9	F14B8.6		T06C12.12
F46G10.4	F11F1.5	F14B8.7		T06C12.7
F46G10.6	F11F1.7	F14D12.1		T06E6.10
F47B10.2	F11F1.8	F14D12.4		T06E6.13
F47B10.7	F11G11.14	F14D12.6		T07A5.4
F47B3.5	F11G11.3	F14D7.11		T07A9.9
F47B8.1	F11G11.9	F14D7.9		T07C4.9
F47B8.4	F11H8.2	F14E5.5		T07D1.1
F47C12.6	F12A10.4	F14F11.2		T07D10.2
F47C12.7	F12A10.5	F14F3.1		T07D3.5
F47D12.1	F12A10.6	F14F7.5		T07D3.7
F47D2.6	F12A10.7	F14F8.12		T08A9.5
F47E1.1	F12B6.1	F14F9.2		T08B1.3
F47F6.1	F12E12.11	F14F9.3		T08B2.5
F47F6.3	F12E12.2	F14F9.4		T08B6.1
F47F6.5	F12E12.3	F14H12.1		T08B6.5
F47G4.3	F12F3.1	F14H3.2		T08E11.6
F47G4.5	F12F6.10	F14H8.4		T08G3.1
F47G4.7	F13A2.9	F15A2.6		T08G3.11
F48C1.1	F13A7.10	F15A4.6		T08G5.10
F48C1.3	F13A7.11	F15A8.1		T08H10.4
F48C1.8	F13A7.12	F15A8.5		T08H4.1
F48E3.2	F13A7.7	F15A8.6		T09A12.2
F48F7.5	F13B10.1	F15B9.1		T09A5.1
F48F7.7	F13B12.3	F15B9.6		T09A5.2
F48F7.8	F13B6.1	F15B9.7		T09B4.5
F48G7.5	F13B6.3	F15B9.8		T09F5.1
F48G7.7	F13C5.5	F15C11.1		T09F5.2
F49A5.3	F13C5.6	F15D3.3		T10B5.4
F49B2.2	F13D11.2	F15D3.8		T10B9.10
F49B2.4	F13D12.8	F15D4.4		T10E9.8
F49C12.13	F13D12.9	F15D4.8		T11B7.2
F49C12.14	F13D2.1	F15E6.2		T11F9.6
F49C12.7	F13D2.4	F15G9.4		T12A7.1
F49C12.9	F13E9.10	F15H10.1		T12A7.6
F49C5.2	F13E9.15	F15H10.2		T12B5.4
F49C5.3	F13E9.16	F15H10.8		T12B5.6
F49D11.3	F13E9.8	F16B3.1		T13C5.8
F49D11.7	F13G3.1	F16B3.2		T13F2.8
F49E10.2	F13H6.3	F16B3.3		T13G4.1
F49E10.4	F13H8.1	F16B4.12		T14B1.1
F49E11.2	F13H8.12	F16B4.2		T14E8.4
F49E12.12	F13H8.4	F16B4.5		T14F9.2
F49E12.2	F14B4.1	F16B4.9		T14G11.1
F49E12.5	F14B8.5	F16C3.2		T15B12.1
F49E12.9	F14B8.6	F16D3.7		T15B7.6
F49F1.1	F14B8.7	F16F9.2		T16A1.4
F49F1.12	F14D2.7	F16F9.3		T16A9.2
F49F1.6	F14D7.10	F16F9.5		T16D1.1
F49F1.7	F14D7.11	F16H6.10		T16G1.10
F49H6.13	F14D7.6	F16H9.1		T16G12.7
F52A8.3	F14D7.7	F16H9.2		T17A3.2
F52B11.3	F14D7.8	F17A2.4		T17A3.4
F52C6.12	F14D7.9	F17A2.8		T17A3.6
F52C6.13	F14E5.5	F17A9.3		T18D3.3
F52C6.6	F14F11.1	F17B5.4		T18D3.4
F52D1.2	F14F11.2	F17B5.5		T19B4.4
F52D2.9	F14F3.1	F17C11.3		T19C4.4
F52E1.14	F14F4.3	F17C8.2		T19C4.5
F52E1.7	F14F7.1	F17C8.5		T19C9.5
F52E1.9	F14F7.3	F17C8.6		T19E7.6
F52E10.3	F14F8.12	F17C8.7		T19H12.11
F52E10.4	F14F8.13	F17E5.1		T20B6.3
F52E4.6	F14F8.9	F17E9.11		T20D4.11
F52F10.3	F14F9.4	F17E9.5		T20D4.16
F52F10.5	F14H12.1	F18A11.2		T20D4.17
F52F12.8	F14H12.3	F18A11.5		T20D4.7
F52G3.3	F14H12.7	F18A12.8		T20F5.5
F52H2.3	F14H3.11	F18C12.1		T21B4.14
F52H2.5	F14H3.9	F18C5.5		T21C12.3
F52H2.6	F14H8.4	F18C5.9		T21C12.4
F52H3.1	F14H8.6	F18E3.1		T21C12.8
F53A2.2	F15A2.6	F18E3.4		T21E3.3
F53A9.1	F15A4.1	F18E3.7		T22A3.2
F53A9.2	F15A4.3	F18E9.4		T22B7.3
F53A9.5	F15A4.4	F18E9.5		T22C8.4
F53A9.9	F15A4.6	F18E9.6		T22F3.10
F53B1.3	F15A4.8	F18F11.4		T22F3.11
F53B1.4	F15A8.1	F19B2.5		T22H2.2
F53B2.2	F15A8.6	F19B6.3		T23B3.3
F53B6.6	F15B9.6	F19C7.8		T23D5.10
F53B6.7	F15B9.7	F19D8.1		T23D5.11
F53B6.8	F15B9.9	F19F10.3		T23D5.8
F53C11.1	F15D3.1	F19F10.8		T23E7.2
F53C3.12	F15D3.3	F19G12.1		T23E7.5
F53C3.8	F15D3.6	F19G12.2		T23E7.6
F53E10.2	F15D3.8	F19G12.4		T23F1.6
F53E10.3	F15D4.6	F19G12.7		T23F1.7
F53E10.4	F15E11.11	F19H6.2		T23F11.2
F53F1.4	F15G9.1	F19H8.2		T23F11.6
F53F1.5	F15G9.3	F19H8.4		T23F6.1
F53F4.13	F15H10.10	F20A1.1		T23F6.2
F53F4.17	F16B12.2	F20A1.3		T23G7.3
F53F8.6	F16B3.1	F20B10.1		T24B8.3
F53G12.8	F16B3.3	F20B10.3		T24C2.5
F53G2.3	F16B4.12	F20B6.4		T24C4.2
F53G2.4	F16B4.2	F20C5.2		T24D8.5
F54B11.10	F16B4.5	F20C5.3		T24F1.5
F54B11.2	F16B4.9	F20C5.4		T24H10.5
F54B8.7	F16D3.6	F20C5.7		T25B2.3
F54C1.8	F16F9.2	F20D1.7		T25B6.2
F54D10.9	F16F9.3	F20D1.8		T25B6.3
F54D12.11	F16G10.1	F20D6.10		T25D1.1
F54D5.3	F16G10.9	F20D6.8		T25D1.3
F54D5.4	F16H11.2	F20D6.9		T25E12.6
F54D8.2	F16H6.2	F20E11.15		T25F10.5
F54E2.1	F16H6.5	F20E11.6		T26A8.3
F54E2.6	F16H6.8	F20G2.3		T26C12.3
F54F2.2	F17A2.10	F20G2.5		T26E3.2
F54F3.1	F17A2.11	F20G2.6		T26E3.5
F54F3.3	F17A2.4	F21A10.4		T26E4.3
F54F7.8	F17A2.7	F21A3.1		T26G10.4
F54G8.3	F17A2.8	F21A3.8		T27A1.2
F54H12.4	F17A9.3	F21A9.1		T27A1.4
F54H5.4	F17A9.4	F21C10.11		T27A3.3
F55A12.2	F17B5.1	F21C10.3		T27B7.7
F55A12.6	F17B5.4	F21C10.4		T27C10.7
F55A3.7	F17C11.2	F21C10.7		T27C4.4
F55B11.4	F17C11.5	F21C10.8		T27E4.5
F55B12.9	F17C8.1	F21D12.2		T27E4.7
F55C12.7	F17C8.4	F21D12.3		T27F6.8
F55C5.10	F17C8.5	F21E9.3		T28A11.16
F55C5.9	F17C8.7	F21F12.1		T28A11.17
F55C9.3	F17E5.1	F21F3.1		T28A11.20
F55D1.2	F17E9.11	F21F3.5		T28A11.22
F55D10.1	F17E9.5	F21F8.1		T28A11.6
F55D12.6	F18A12.8	F21F8.4		T28A8.2
F55E10.1	F18C5.4	F21G4.1		T28C6.10
F55E10.7	F18E2.1	F21G4.5		T28D9.11
F55F3.2	F18E2.5	F21H11.3		T28F2.3
F55F3.3	F18E3.11	F21H12.3		T28H10.1
F55F3.4	F18E3.4	F21H12.7		VB0393L.2
F55F8.1	F18E3.7	F21H7.11		VB0395L.1
F55F8.8	F18E9.4	F21H7.12		VC5.1
F55G1.15	F18E9.6	F21H7.4		VC5.2
F55G11.2	F18F11.1	F22A3.1		VM106R.1
F55G11.4	F18G5.2	F22B7.1		VY10G11R.1
F55G11.5	F18G5.3	F22B7.10		VY10G11R.2
F55G11.6	F19B10.13	F22B8.1		W01A11.6
F55G11.7	F19B2.5	F22D6.15		W01A11.7
F55G11.8	F19B6.3	F22E10.1		W02A2.3
F55H12.3	F19B6.4	F22E10.3		W02A2.8
F55H12.6	F19C7.2	F22E12.1		W02C12.1
F55H2.2	F19C7.5	F22E12.2		W02D7.11
F56A11.7	F19C7.6	F22E12.3		W02D7.2
F56A4.2	F19C7.8	F22E5.13		W02D9.5
F56A4.9	F19D8.1	F22E5.21		W02D9.6
F56B3.2	F19D8.2	F22E5.6		W02G9.3
F56C3.2	F19G12.1	F22F4.1		W02H5.1
F56C3.6	F19G12.2	F22G12.2		W02H5.10
F56C3.7	F19G12.3	F22H10.3		W03A5.3
F56C3.8	F19G12.4	F22H10.4		W03D8.2
F56C3.9	F19H8.5	F23B2.12		W03F8.6
F56C4.4	F20A1.1	F23B2.5		W03F8.9
F56C9.7	F20A1.3	F23C8.1		W03F9.4
F56C9.8	F20A1.6	F23C8.12		W03H9.1
F56D3.1	F20A1.7	F23C8.13		W03H9.3
F56D5.1	F20B10.3	F23F1.4		W04A4.3
F56D6.1	F20B6.3	F23F12.10		W04A8.4
F56D6.12	F20B6.4	F23F12.3		W04A8.5
F56D6.15	F20B6.5	F23H11.7		W04D2.3
F56D6.2	F20C5.2	F23H11.8		W04E12.2
F56F10.1	F20C5.5	F23H12.4		W04E12.3
F56F11.4	F20D12.5	F23H12.5		W04H10.1
F56F4.6	F20D12.6	F23H12.8		W05E10.2
F56F4.8	F20D6.10	F23H12.9		W05E10.3
F56G4.7	F20D6.3	F25A2.1		W05G11.2
F56H1.1	F20D6.6	F25B3.2		W05H5.5
F56H9.6	F20D6.9	F25B3.3		W05H5.6
F57A10.1	F20E11.15	F25B3.5		W05H7.1
F57A8.3	F20E11.5	F25C8.3		W05H7.3
F57A8.8	F21A3.1	F25D1.3		W05H7.4
F57B10.8	F21A3.4	F25D1.4		W05H9.3
F57B9.9	F21C10.10	F25D7.3		W06G6.8
F57C9.6	F21C10.3	F25E2.1		W07B8.4
F57E7.3	F21C10.4	F25E2.3		W07G1.2
F57F4.3	F21C10.7	F25E2.4		W08A12.1
F57F4.4	F21C10.8	F25E5.2		W08A12.2
F57F5.1	F21C10.9	F25E5.4		W08D2.4
F57G8.5	F21C3.1	F25E5.7		W08E12.3
F57G8.7	F21D12.1	F25G6.6		W08E3.1
F57H12.7	F21D12.2	F25G6.7		W09B6.4
F58A3.4	F21D9.8	F25H5.2		W09D12.1
F58A4.1	F21F3.1	F25H8.3		W09G12.1
F58A6.2	F21F3.3	F25H8.5		W09G12.10
F58A6.8	F21F8.11	F25H8.6		W09G12.4
F58A6.9	F21F8.6	F26A1.4		W09G12.7
F58B3.1	F21H11.3	F26A1.6		W09G3.1
F58B3.2	F21H12.3	F26A10.2		W09G3.2
F58B3.3	F21H7.12	F26B1.4		W09G3.7
F58B4.6	F21H7.14	F26C11.2		W10C8.4
F58D12.1	F21H7.4	F26C11.4		W10D9.1
F58E2.9	F22A3.5	F26D10.11		W10D9.2
F58E6.7	F22B3.10	F26D11.10		W10G11.13
F58F9.6	F22B5.3	F26D11.4		W10G11.14
F58G1.4	F22B5.4	F26D2.1		W10G11.3
F58G1.5	F22B7.1	F26E4.7		Y102A11A.8
F58G1.6	F22B7.9	F26F12.4		Y102A5C.9
F58G4.4	F22B8.1	F26F2.1		Y102E9.6
F58G4.7	F22B8.4	F26F2.3		Y105C5A.10
F58G6.7	F22B8.6	F26F2.5		Y105C5A.12
F58H7.3	F22D6.1	F26F4.3		Y105C5A.4
F58H7.8	F22D6.12	F26G1.5		Y105C5B.28
F59A1.10	F22D6.15	F26G1.7		Y105C5B.29
F59A1.6	F22E12.1	F26G1.9		Y106G6E.3
F59A1.8	F22E12.3	F27B3.7		Y10G11A.2
F59A7.9	F22E5.13	F27C1.8		Y10G11A.3
F59B1.1	F22E5.7	F27D4.4		Y110A2AL.4
F59B1.8	F22F1.3	F27D9.6		Y110A2AL.5
F59C6.14	F22F4.1	F27D9.8		Y110A7A.4
F59D12.4	F22G12.1	F27E5.4		Y113G7A.13
F59D12.5	F22G12.2	F28A10.7		Y113G7A.16
F59D6.5	F22H10.3	F28A12.2		Y116A8A.3
F59E11.12	F22H10.4	F28B12.1		Y116A8A.7
F59E11.6	F23A7.5	F28B12.2		Y116A8C.1
F59E12.12	F23B12.4	F28B4.2		Y116A8C.24
F59F3.4	F23B2.11	F28B4.3		Y116F11A.1
F59F5.1	F23C8.13	F28C1.2		Y116F11A.3
F59F5.2	F23D12.3	F28C12.1		Y119C1B.6
F59G1.1	F23D12.8	F28C12.4		Y119D3B.14
F59H6.4	F23F12.13	F28C6.9		Y119D3B.5
F59H6.6	F23F12.4	F28D1.9		Y119D3B.9
F59H6.7	F23G4.1	F28D9.2		Y11D7A.3
H01M10.2	F23H11.8	F28E10.1		Y11D7A.4
H02F09.3	F23H12.8	F28E10.2		Y13C8A.2
H03A11.2	F25A2.1	F28F9.1		Y15E3A.5
H03E18.1	F25B3.2	F28H1.5		Y17D7B.1
H04M03.2	F25B3.3	F28H7.8		Y17D7B.2
H05C05.3	F25B3.4	F29B9.12		Y17G9B.7
H06A10.1	F25B3.5	F29B9.9		Y18D10A.26
H06H21.2	F25B5.3	F29C12.1		Y19D10A.11
H08J19.1	F25C8.3	F29C4.4		Y22D7AR.11
H10D18.3	F25D1.2	F29D11.1		Y23H5A.5
H12D21.3	F25D1.5	F29F11.5		Y23H5B.12
H12D21.7	F25E2.1	F29G6.1		Y23H5B.8
H12D21.9	F25E2.3	F29G6.2		Y24F12A.3
H12I13.5	F25E2.4	F29G9.4		Y25C1A.6
H12I13.6	F25E5.10	F30A10.11		Y27F2A.8
H13N06.2	F25E5.13	F30A10.2		Y27F2A.9
H16D19.1	F25E5.4	F30A10.8		Y2H9A.2
H16O14.1	F25E5.5	F30B5.1		Y37A1A.4
H19M22.3	F25E5.7	F30B5.7		Y37D8A.5
H20E11.1	F25F6.1	F30F8.2		Y37D8A.8
H20E11.3	F25F8.1	F30F8.5		Y37E11AL.2
H23L24.1	F25G6.7	F30H5.3		Y37E11AL.9
H24D24.1	F25G6.8	F31A3.4		Y37E11AR.2
H25K10.1	F25H5.1	F31A9.3		Y37E11B.3
H25P06.4	F25H8.3	F31B12.1		Y37H2A.8
H31B20.2	F25H9.3	F31D4.4		Y38A10A.4
H31G24.1	F26A1.4	F31D4.6		Y38E10A.16
H32K16.1	F26A1.6	F31D5.4		Y38E10A.3
H34I24.1	F26A1.8	F31D5.5		Y38F1A.8
H34I24.2	F26A10.2	F31E3.2		Y38F2AL.2
H34P18.1	F26A3.4	F31E8.2		Y38F2AR.13
H36L18.2	F26B1.4	F31F4.11		Y38H6C.23
H42K12.3	F26C11.2	F31F6.4		Y38H6C.7
H43E16.1	F26C11.3	F31F6.5		Y38H8A.4
JC8.12	F26D10.13	F31F6.6		Y39A1A.16
K01A11.4	F26D10.8	F31F7.2		Y39A1A.20
K01A2.11	F26D10.9	F32A11.6		Y39A3A.3
K01B6.1	F26D11.10	F32A5.4		Y39A3CL.3
K01D12.11	F26D11.12	F32A5.6		Y39A3CL.5
K01D12.12	F26D11.13	F32A5.8		Y39A3CL.6
K01D12.15	F26D11.4	F32A6.4		Y39B6A.33
K01F9.2	F26D2.14	F32A7.3		Y39B6A.9
K02A4.1	F26D2.4	F32A7.8		Y39G10AL.1
K02A4.2	F26E4.3	F32B4.2		Y39G10AR.10
K02B12.6	F26F12.4	F32B4.6		Y39G10AR.11
K02B12.9	F26F2.1	F32B5.2		Y39G10AR.5
K02D3.1	F26F2.3	F32B5.7		Y39G8B.4
K02D7.1	F26F2.4	F32B6.4		Y39H10B.1
K02D7.3	F26F2.5	F32B6.7		Y40A1A.3
K02D7.4	F26F2.8	F32D1.3		Y40B10A.6
K02E10.4	F26G1.4	F32D8.10		Y40H7A.3
K02E11.10	F26G1.7	F32D8.3		Y41D4A.3
K02E11.3	F27B3.6	F32D8.7		Y41D4A.8
K02E11.5	F27C8.1	F32E10.3		Y41D4B.10
K02E11.7	F27C8.5	F32F2.1		Y41D4B.26
K02E2.1	F27D4.4	F32G8.4		Y41D4B.8
K02E2.6	F27D4.7	F32H2.5		Y41E3.12
K02E7.7	F27D9.7	F32H2.6		Y41E3.22
K02F3.3	F27D9.8	F32H2.8		Y41G9A.10
K02F6.9	F27E5.1	F32H5.5		Y42H9AR.2
K02G10.3	F27E5.3	F32H5.7		Y43B11AL.1
K02G10.7	F28A10.1	F33A8.10		Y43C5A.7
K03A1.5	F28A10.3	F33A8.2		Y43F11A.1
K03A11.3	F28A10.8	F33A8.6		Y43F4A.3
K03D7.4	F28A12.4	F33A8.7		Y43F8B.5
K03E6.5	F28B12.1	F33D11.1		Y43F8B.9
K03H1.10	F28B4.3	F33D11.3		Y43F8C.1
K03H1.12	F28C1.2	F33D4.3		Y43F8C.11
K03H1.6	F28C10.1	F33D4.6		Y43F8C.2
K03H6.7	F28C12.5	F33E11.1		Y44A6D.6
K03H9.1	F28C6.10	F33E2.2		Y44E3A.1
K03H9.2	F28C6.4	F33G12.6		Y44E3B.1
K04A8.1	F28C6.9	F33H1.6		Y45F10B.4
K04A8.5	F28D1.3	F33H12.2		Y45F10B.6
K04A8.6	F28D1.4	F33H12.5		Y45G5AM.5
K04C1.4	F28D1.5	F33H2.8		Y46C8AR.1
K04C2.6	F28D9.4	F34D10.5		Y46E12A.4
K04E7.2	F28E10.1	F34D10.6		Y46G5A.26
K04F1.1	F28E10.5	F34H10.2		Y46G5A.7
K04F1.2	F28F5.3	F34H10.3		Y46H3A.5
K04F1.9	F28F8.1	F35A5.1		Y46H3C.4
K04F10.6	F28F9.1	F35A5.3		Y46H3C.5
K04H4.5	F28H6.2	F35B12.2		Y46H3D.7
K05B2.5	F28H6.6	F35B12.3		Y47D3B.12
K05C4.10	F28H7.10	F35B12.6		Y47D3B.2
K05C4.4	F28H7.7	F35B12.7		Y47D3B.6
K05D4.2	F28H7.8	F35B12.9		Y47D7A.1
K05F1.10	F28H7.9	F35B3.4		Y47D7A.2
K05F1.2	F29A7.1	F35B3.7		Y47D9A.4
K05F1.8	F29B9.12	F35C11.2		Y47G6A.13
K05F1.9	F29C4.4	F35C11.3		Y47G6A.26
K05G3.1	F29C6.1	F35C11.7		Y47H10A.3
K05G3.3	F29F11.5	F35C12.2		Y47H10A.4
K06A1.1	F29G6.2	F35C5.10		Y47H9C.10
K06A4.1	F29G9.4	F35C5.5		Y47H9C.11
K06A4.5	F30A10.12	F35C5.9		Y47H9C.5
K06A4.6	F30A10.2	F35D11.10		Y47H9C.7
K06A4.7	F30F8.2	F35D11.11		Y48A5A.2
K06A9.1	F30H5.3	F35D11.2		Y48A5A.3
K06B4.12	F31A3.3	F35D11.7		Y48A6B.1
K06B4.2	F31A3.4	F35D11.9		Y48B6A.6
K06B9.5	F31B12.1	F35D2.5		Y48C3A.1
K06C4.8	F31B9.1	F35E12.10		Y48C3A.16
K06G5.1	F31D4.6	F35E12.2		Y48E1B.9
K07A1.3	F31D4.7	F35E12.4		Y48G8AL.12
K07A3.3	F31D5.4	F35E12.5		Y48G8AL.13
K07B1.4	F31E3.1	F35E12.7		Y49E10.10
K07C5.5	F31E3.2	F35E12.8		Y49F6C.3
K07C6.11	F31E8.2	F35E12.9		Y49F6C.4
K07C6.3	F31E8.5	F35E8.11		Y50D4B.1
K07C6.4	F31E9.3	F35E8.6		Y51A2B.4
K07E3.7	F31F4.1	F35E8.8		Y51B9A.5
K07E8.3	F31F4.15	F35F10.11		Y51H4A.10
K07F5.17	F31F4.2	F35F10.14		Y51H4A.15
K07F5.2	F31F4.3	F35F10.6		Y51H4A.22
K07F5.3	F31F4.6	F35F10.7		Y51H4A.32
K07F5.5	F31F6.3	F35G12.6		Y51H7BR.1
K07H8.12	F31F7.2	F35H10.10		Y51H7C.8
K07H8.6	F32A11.3	F35H10.3		Y52B11A.5
K08B12.1	F32A11.6	F35H8.1		Y53C12A.2
K08B4.3	F32A5.2	F35H8.5		Y53F4A.2
K08B4.4	F32A5.3	F36A2.10		Y53F4B.35
K08B5.1	F32A5.5	F36A2.12		Y53G8AL.1
K08C7.1	F32A6.2	F36A2.14		Y53G8AM.6
K08C9.4	F32A6.4	F36A4.11		Y54F10AM.11
K08D12.4	F32A6.5	F36A4.4		Y54G2A.1
K08D12.6	F32A7.3	F36D1.10		Y54G2A.10
K08D12.7	F32B4.2	F36D1.4		Y54G2A.29
K08D8.1	F32B4.6	F36D1.5		Y54G2A.40
K08D8.2	F32B5.4	F36D3.10		Y54G2A.46
K08D8.4	F32B5.7	F36D3.4		Y54G2A.48
K08D8.5	F32B6.4	F36D3.9		Y55B1BL.1
K08D8.6	F32B6.6	F36D4.5		Y55B1BR.3
K08D9.5	F32B6.7	F36G3.1		Y55D5A.1
K08E3.2	F32D1.3	F36G3.3		Y55D5A.2
K08E5.3	F32D1.4	F36H12.10		Y55F3AM.13
K08E7.4	F32D1.8	F36H2.3		Y55F3AM.2
K08E7.6	F32D8.12	F36H2.5		Y57A10B.5
K08E7.8	F32D8.7	F36H5.2		Y57A10C.8
K08F4.6	F32E10.7	F36H5.3		Y57G11B.2
K08F8.2	F32F2.1	F36H9.5		Y57G11C.8
K08F8.4	F32G8.3	F36H9.7		Y57G7A.2
K08F8.7	F32G8.4	F36H9.8		Y57G7A.4
K08G2.8	F32G8.6	F37A4.4		Y57G7A.8
K08H10.9	F32H2.8	F37A4.5		Y58A7A.4
K09B11.10	F32H5.1	F37A4.7		Y58A7A.6
K09B11.4	F32H5.7	F37A8.5		Y59A8A.4
K09C4.2	F33A8.10	F37B1.1		Y59A8B.11
K09C6.2	F33A8.2	F37B1.3		Y59E9AR.9
K09C6.6	F33A8.6	F37B1.4		Y60A3A.5
K09C8.1	F33A8.7	F37B1.5		Y61A9LA.12
K09D9.1	F33D11.2	F37C12.14		Y61B8B.1
K09D9.6	F33D11.3	F37C12.16		Y62H9A.1
K09E10.2	F33D11.8	F37C12.18		Y62H9A.12
K09E3.7	F33D4.2	F37C4.7		Y63D3A.11
K09E4.6	F33D4.6	F37F2.3		Y63D3A.2
K09E9.1	F33E11.1	F38A1.1		Y63D3A.3
K09E9.4	F33E2.6	F38A3.2		Y64G10A.7
K09F5.4	F33E2.7	F38A5.14		Y65B4A.7
K09F6.6	F33H1.6	F38A5.3		Y66A7A.3
K09G1.2	F33H12.4	F38A6.1		Y66D12A.11
K09G1.3	F33H12.5	F38A6.4		Y66D12A.12
K09H11.10	F34D10.6	F38B2.2		Y67A10A.11
K09H11.5	F34D10.8	F38B6.1		Y67A10A.5
K09H9.8	F34D6.4	F38B6.2		Y67D8C.4
K10B2.2	F34H10.1	F38B6.5		Y67D8C.6
K10C2.1	F34H10.2	F38B6.6		Y68A4A.13
K10C2.3	F34H10.3	F38B7.1		Y69A2AR.24
K10C8.2	F34H10.4	F38B7.7		Y69A2AR.27
K10C9.1	F35A5.1	F38E1.11		Y69A2AR.3
K10D11.1	F35A5.2	F38E1.8		Y69A2AR.30
K10D11.2	F35A5.3	F38E11.7		Y69E1A.5
K10D11.5	F35B12.10	F38G1.2		Y6E2A.4
K10D11.6	F35B12.3	F38H12.1		Y70C5C.2
K10D2.6	F35B12.4	F38H12.2		Y71A12B.11
K10D2.7	F35B12.6	F39B2.8		Y71A12B.15
K10G4.13	F35B12.7	F39B3.2		Y71A12B.2
K10G4.3	F35B12.9	F39C12.2		Y71A12B.3
K10G4.9	F35B3.1	F39C12.3		Y71F9AL.6
K10H10.2	F35C11.2	F39D8.3		Y71F9AL.7
K11D12.1	F35C11.3	F39E9.1		Y71F9B.13
K11D12.10	F35C11.7	F39E9.6		Y71F9B.8
K11H12.10	F35C12.2	F39G3.4		Y71G12B.32
K11H12.4	F35C12.3	F39G3.5		Y71G12B.33
K11H12.5	F35C5.1	F40C5.2		Y71G12B.7
K12B6.4	F35C5.2	F40D4.11		Y73B3A.16
K12B6.9	F35C5.4	F40E10.2		Y73B3A.8
K12C11.3	F35D11.10	F40E10.4		Y73B3B.2
K12C11.6	F35D11.11	F40E10.5		Y73B6A.6
K12C11.7	F35D11.2	F40F4.5		Y73B6BL.41
K12G11.5	F35D11.7	F40F4.6		Y73B6BL.9
K12H4.7	F35D11.8	F40F8.12		Y73C8B.4
K12H6.8	F35D2.5	F40F8.4		Y73C8C.9
LLC1.2	F35E12.2	F40F8.7		Y73F8A.20
M01A12.1	F35E12.4	F40F8.8		Y73F8A.26
M01B2.2	F35E12.6	F40F9.2		Y73F8A.36
M01D1.9	F35E2.2	F40F9.8		Y74C9A.1
M01E10.3	F35E2.8	F40G9.6		Y75B12B.11
M01E11.4	F35E8.1	F40H7.12		Y75B7B.1
M01E11.5	F35E8.11	F41A4.1		Y75B8A.10
M01E11.7	F35E8.13	F41B4.1		Y75B8A.23
M01G12.13	F35E8.6	F41B4.2		Y76B12C.9
M01G12.6	F35E8.8	F41B4.3		Y79H2A.2
M01H9.1	F35F10.13	F41B4.4		Y7A5A.5
M02B1.4	F35F10.4	F41B5.2		Y80D3A.3
M02D8.2	F35F10.5	F41C3.11		Y80D3A.7
M02F4.7	F35F10.8	F41C3.2		Y81B9A.2
M02H5.1	F35G12.7	F41C6.1		Y82E9BL.2
M02H5.11	F35G2.3	F41C6.5		Y82E9BR.17
M02H5.8	F35G8.2	F41D3.3		Y82E9BR.20
M03A1.6	F35H10.10	F41D3.6		Y82E9BR.5
M03A8.1	F35H10.3	F41D9.1		Y82E9BR.6
M03B6.1	F35H8.4	F41D9.3		Y82E9BR.9
M03E7.1	F36A2.11	F41E6.10		Y87G2A.17
M03E7.4	F36A2.14	F41E6.2		Y92C3B.2
M03F8.5	F36A4.11	F41E7.3		Y95B8A.6
M04C3.1	F36A4.4	F41E7.7		Y95D11A.2
M04C3.2	F36D1.3	F41E7.8		Y97E10AR.1
M04C3.3	F36D3.14	F41F3.3		Y97E10B.9
M04C7.3	F36D3.2	F41F3.8		Y9C12A.1
M04D8.2	F36D3.4	F41G4.3		Y9D1A.1
M04D8.3	F36D3.9	F41H8.4		ZC116.1
M04D8.4	F36D4.4	F42A10.7		ZC123.4
M05B5.6	F36F12.5	F42C5.10		ZC132.9
M05D6.6	F36F12.7	F42C5.3		ZC142.2
M110.8	F36F2.8	F42C5.7		ZC168.1
M142.4	F36G3.3	F42D1.2		ZC196.2
M153.4	F36G9.3	F42E11.2		ZC204.10
M162.8	F36H1.5	F42E11.4		ZC204.11
M163.11	F36H12.10	F42E8.2		ZC204.13
M163.2	F36H12.11	F42F12.1		ZC204.2
M176.10	F36H12.3	F42F12.10		ZC204.8
M176.4	F36H12.4	F42G10.1		ZC21.3
M176.6	F36H12.7	F42G9.4		ZC239.20
M18.1	F36H12.8	F42G9.9		ZC247.3
M195.4	F36H12.9	F42H10.5		ZC266.2
M199.1	F36H2.3	F43A11.1		ZC334.8
M199.6	F36H5.1	F43A11.4		ZC395.4
M28.10	F36H5.2	F43B10.1		ZC395.5
M28.6	F36H9.1	F43B10.2		ZC412.4
M4.2	F36H9.7	F43C1.5		ZC412.8
M6.1	F36H9.8	F43C1.7		ZC416.2
M6.3	F37A4.4	F43C11.10		ZC416.8
M7.10	F37A4.5	F43C11.3		ZC443.1
M7.7	F37A4.7	F43C9.2		ZC443.3
M70.3	F37B1.1	F43D9.1		ZC482.6
PDB1.1	F37B1.4	F43E2.3		ZC487.5
R01H2.1	F37B4.1	F43E2.9		ZC513.11
R01H2.5	F37B4.13	F43G6.4		ZC64.3
R01H2.7	F37B4.4	F43G9.11		ZK1010.4
R02D5.4	F37B4.5	F43H9.2		ZK105.1
R02E12.5	F37C12.14	F44A2.2		ZK1053.4
R02E12.8	F37C12.18	F44A2.3		ZK1086.2
R03A10.6	F37C4.1	F44A2.5		ZK1127.12
R03D7.2	F37C4.2	F44B9.1		ZK1128.8
R03G5.5	F37D6.6	F44B9.10		ZK1240.6
R03G5.6	F37F2.3	F44C4.5		ZK1248.2
R03G8.3	F37H8.4	F44C8.8		ZK1251.3
R03H10.4	F38A1.1	F44D12.2		ZK1251.7
R03H10.5	F38A1.10	F44D12.4		ZK1307.2
R03H4.9	F38A1.14	F44D12.5		ZK177.11
R04B3.1	F38A1.5	F44E2.4		ZK262.11
R04B5.8	F38A5.10	F44E5.4		ZK262.4
R04B5.9	F38A5.14	F44E5.5		ZK337.1
R04D3.1	F38A5.3	F44E7.8		ZK353.2
R04D3.9	F38A6.1	F44F1.4		ZK355.3
R04F11.1	F38B6.1	F44F4.1		ZK355.5
R05A10.7	F38B6.5	F44F4.10		ZK380.4
R05A10.8	F38C2.1	F44F4.3		ZK384.1
R05F9.12	F38C2.8	F44F4.4		ZK39.4
R05F9.13	F38E1.8	F44G3.10		ZK39.6
R05F9.3	F38E11.1	F44G3.14		ZK39.7
R05F9.7	F38H12.2	F44G3.6		ZK39.8
R05F9.8	F38H4.5	F44G4.8		ZK402.3
R05G9.1	F39B2.2	F45B8.4		ZK418.1
R05H10.6	F39B2.8	F45C12.3		ZK430.5
R05H5.2	F39C12.2	F45D11.14		ZK470.4
R05H5.6	F39D8.2	F45D11.15		ZK470.6
R05H5.7	F39E9.12	F45D11.16		ZK484.5
R06A10.3	F39E9.14	F45E1.4		ZK484.8
R06A10.5	F39E9.2	F45E1.5		ZK488.10
R06B10.3	F39H12.4	F45E10.1		ZK512.11
R06B10.4	F40B1.1	F45E10.2		ZK512.3
R07B1.13	F40C5.2	F45E4.3		ZK616.2
R07B1.3	F40D4.1	F45E4.4		ZK616.9
R07B1.4	F40D4.12	F45E4.5		ZK617.3
R07B1.5	F40D4.13	F45F2.5		ZK622.4
R07B7.10	F40D4.2	F45G2.2		ZK637.12
R07B7.11	F40E10.2	F45H10.5		ZK666.1
R07B7.9	F40E10.4	F45H7.2		ZK666.6
R07C12.4	F40E3.3	F45H7.4		ZK666.7
R07C3.12	F40E3.5	F45H7.6		ZK673.1
R07C3.14	F40F4.5	F46A8.4		ZK673.5
R07E3.1	F40F8.4	F46A9.3		ZK678.3
R07E3.2	F40F8.7	F46B3.1		ZK75.1
R07E3.4	F40F9.3	F46B3.15		ZK75.2
R07E3.6	F40F9.8	F46B3.2		ZK75.3
R07E3.7	F40G12.7	F46B3.5		ZK792.7
R07E5.5	F40H3.4	F46B6.11		ZK84.7
R08B4.1	F40H3.5	F46C3.3		ZK849.6
R08B4.2	F40H3.6	F46C5.7		ZK856.4
R08C7.1	F40H7.12	F46C8.2		ZK892.6
R08C7.11	F41B4.1	F46C8.5		ZK892.7
R08C7.12	F41B5.2	F46C8.6		ZK899.3
R08C7.4	F41B5.3	F46C8.8		ZK899.5
R08E3.1	F41B5.4	F46E10.11		ZK899.6
R08E3.2	F41B5.6	F46F11.11		ZK909.4
R08E5.2	F41D3.3	F46F11.3		ZK909.6
R08F11.3	F41D9.3	F46F11.7		ZK930.4
R08F11.4	F41E6.8	F46F3.1		ZK938.1
R08H2.3	F41G3.17	F46F3.3		ZK938.2
R08H2.7	F41G3.18	F46F5.1		ZK945.4
R09A1.3	F41G3.21	F46F6.4		ZK970.1
R09A8.4	F41G3.5	F46G10.2
R09B3.2	F41G4.3	F46G10.3
R09B5.2	F41G4.4	F46G10.4
R09B5.4	F41H10.12	F46G11.4
R09D1.1	F41H10.7	F46H5.8
R09D1.10	F41H10.8	F47A4.1
R09D1.4	F41H10.9	F47A4.3
R09E10.10	F41H8.1	F47B10.2
R09E10.6	F41H8.4	F47B10.7
R09E12.4	F42A10.6	F47B10.8
R09E12.9	F42A10.7	F47B3.3
R09F10.2	F42A10.8	F47B3.5
R09H10.5	F42A10.9	F47B8.10
R09H10.6	F42A6.6	F47C12.1
R102.1	F42A8.1	F47C12.6
R102.4	F42A9.3	F47D12.1
R102.8	F42C5.10	F47D12.6
R102.9	F42C5.2	F47D2.4
R107.1	F42D1.2	F47D2.6
R10D12.9	F42E11.3	F47F2.1
R10F2.4	F42E11.4	F47F6.1
R10H10.2	F42E8.2	F47F6.3
R10H10.3	F42F12.10	F47G4.5
R10H10.6	F42F12.4	F47G4.8
R11A5.7	F42G10.1	F47G9.3
R11A8.1	F42G2.2	F47H4.11
R11D1.11	F42G2.3	F48A11.1
R11D1.7	F42G2.4	F48B9.4
R11E3.1	F42G4.5	F48C1.1
R11G11.12	F42G4.6	F48C1.3
R11G11.9	F42G4.7	F48C1.7
R11H6.1	F42G8.9	F48C11.1
R12A1.4	F42G9.5	F48C5.1
R12B2.7	F42G9.9	F48C5.2
R12C12.1	F42H10.5	F48E3.1
R12C12.9	F42H11.1	F48E3.2
R12E2.5	F43A11.1	F48E3.6
R13A1.10	F43B10.2	F48E3.7
R13A1.7	F43C11.1	F48E3.8
R13A5.10	F43C11.10	F48F5.6
R13D11.1	F43C11.12	F48F7.7
R13D11.10	F43C11.3	F48F7.8
R13D7.10	F43C9.1	F48G7.10
R13F6.2	F43C9.2	F48G7.11
R13F6.3	F43C9.4	F48G7.4
R13H4.3	F43D9.1	F48G7.5
R13H8.1	F43E2.3	F48G7.7
R13H9.2	F43E2.5	F49B2.4
R13H9.4	F43E2.6	F49B2.5
R144.9	F43H9.2	F49C12.10
R151.4	F43H9.4	F49C12.2
R155.3	F44A2.3	F49C5.2
R160.2	F44A2.4	F49E10.2
R186.4	F44B9.10	F49E10.3
R186.6	F44B9.4	F49E10.4
R193.2	F44C4.5	F49E10.5
R193.3	F44C8.4	F49E11.2
R52.7	F44C8.5	F49E11.8
R52.8	F44C8.6	F49E12.10
R57.1	F44C8.9	F49E12.12
R57.2	F44D12.2	F49E12.4
R90.2	F44D12.4	F49E12.5
T01B10.4	F44E2.4	F49E12.9
T01B11.2	F44E5.4	F49E2.4
T01B7.7	F44E5.5	F49F1.1
T01C1.4	F44F1.6	F49F1.12
T01C2.1	F44F4.1	F49F1.5
T01D1.5	F44F4.10	F49F1.6
T01D3.6	F44G3.1	F49F1.7
T01G6.3	F44G3.14	F49F1.9
T01G6.7	F44G3.5	F49H6.13
T01G6.9	F45B8.4	F49H6.3
T01H3.5	F45C12.3	F49H6.5
T02B11.3	F45C12.4	F52A8.3
T02B11.4	F45D11.14	F52B10.2
T02B5.1	F45D11.15	F52B10.3
T02C12.1	F45D11.16	F52B11.3
T02D1.3	F45E1.3	F52C6.12
T02D1.5	F45E1.4	F52C6.14
T02D1.7	F45E10.1	F52C9.5
T02G5.1	F45E4.1	F52D1.1
T02G5.6	F45E4.3	F52D1.2
T02H6.10	F45E4.5	F52D1.3
T02H6.9	F45E4.7	F52D10.1
T03D3.2	F45G2.2	F52D10.4
T03E6.2	F45H10.5	F52D2.1
T03E6.5	F45H11.6	F52D2.9
T03F7.5	F45H7.2	F52E1.5
T03G11.8	F45H7.4	F52E1.8
T03G11.9	F45H7.6	F52E1.9
T03G6.1	F46A8.4	F52E10.3
T04B2.8	F46A8.5	F52E10.4
T04C12.4	F46A9.2	F52E4.6
T04G9.5	F46A9.3	F52F10.2
T04H1.3	F46B3.15	F52F10.3
T05A12.1	F46B3.2	F52F12.5
T05A12.2	F46B6.9	F52F12.8
T05A7.5	F46C3.3	F52G3.5
T05B4.2	F46C5.1	F52H2.3
T05B4.3	F46C5.10	F52H2.4
T05B9.1	F46C5.6	F52H3.1
T05C12.10	F46C5.7	F53A2.11
T05C12.5	F46C8.5	F53A2.2
T05C3.6	F46C8.7	F53A2.9
T05E11.2	F46E10.1	F53A9.1
T05E11.7	F46F11.3	F53A9.2
T05E12.2	F46F3.1	F53A9.6
T05E12.6	F46F5.1	F53A9.7
T05E7.1	F46F5.13	F53A9.8
T05F1.5	F46F5.5	F53A9.9
T05F1.8	F46F5.9	F53B1.4
T05G5.2	F46F6.4	F53B1.6
T05H4.15	F46G10.5	F53B2.2
T05H4.7	F46G10.6	F53B2.5
T06A1.5	F46G11.4	F53B2.8
T06A4.3	F47A4.1	F53B3.6
T06C12.2	F47B10.8	F53B6.2
T06D8.10	F47B3.5	F53B6.8
T06E4.12	F47B3.7	F53B7.5
T06E4.9	F47B8.1	F53C11.1
T06E8.2	F47B8.2	F53C3.3
T06F4.1	F47C10.2	F53C3.6
T06G6.2	F47C10.4	F53F1.4
T06G6.6	F47C12.1	F53F1.5
T06G6.7	F47C12.11	F53F10.1
T06H11.5	F47C12.6	F53F4.13
T07C12.10	F47C12.7	F53F4.5
T07C12.9	F47D12.1	F53G2.4
T07C5.1	F47D12.7	F53H4.3
T07C5.4	F47D2.6	F53H4.5
T07D1.3	F47D2.7	F54A5.2
T07D10.4	F47D2.8	F54B11.10
T07D10.6	F47D2.9	F54B11.2
T07D3.1	F47F2.2	F54B11.8
T07D3.4	F47F2.3	F54B11.9
T07D3.9	F47G4.1	F54B8.3
T07E3.4	F47G4.5	F54B8.4
T07H3.6	F47H4.11	F54C1.9
T07H6.1	F47H4.2	F54C9.11
T07H6.4	F47H4.7	F54C9.4
T07H8.1	F48A11.1	F54D1.4
T07H8.6	F48A9.2	F54D1.6
T08A9.11	F48B9.1	F54D10.2
T08A9.12	F48B9.4	F54D10.9
T08A9.3	F48C1.4	F54D12.11
T08A9.8	F48C1.8	F54D12.9
T08A9.9	F48C11.2	F54D5.15
T08B1.1	F48C5.1	F54D7.3
T08B2.10	F48C5.2	F54E2.1
T08E11.2	F48E3.1	F54E2.3
T08E11.7	F48E3.7	F54E2.6
T08G11.3	F48F5.6	F54F2.1
T08G3.10	F48F7.7	F54F2.2
T08G3.3	F48G7.11	F54F3.3
T08G5.8	F48G7.2	F54F3.4
T09A12.1	F48G7.5	F54F7.3
T09A12.4	F48G7.7	F54F7.8
T09B4.7	F49A5.2	F54G2.1
T09E11.1	F49B2.3	F54G2.2
T09E11.12	F49B2.4	F54G8.1
T09E11.3	F49C12.12	F54G8.4
T09F5.3	F49C12.13	F54H5.2
T10B10.1	F49C12.14	F54H5.4
T10B10.8	F49C12.6	F55A11.5
T10B10.9	F49C5.11	F55A12.7
T10B11.4	F49C5.2	F55A4.10
T10B9.7	F49C5.7	F55A4.2
T10C6.10	F49D11.2	F55A4.7
T10D4.13	F49E10.2	F55C12.7
T10D4.3	F49E10.3	F55C5.10
T10D4.8	F49E10.5	F55C9.3
T10E10.3	F49E11.2	F55C9.6
T10E10.6	F49E12.12	F55C9.8
T10E10.7	F49E12.4	F55D1.1
T10G3.3	F49E12.5	F55D1.2
T10H4.12	F49E12.7	F55D12.6
T10H4.2	F49E12.8	F55E10.2
T10H4.8	F49E2.1	F55F1.3
T10H9.2	F49E2.4	F55F8.1
T10H9.5	F49F1.12	F55F8.8
T11A5.6	F49F1.5	F55G1.1
T11F9.19	F49F1.6	F55G1.12
T11G6.7	F49H6.3	F55G1.13
T12A2.12	F49H6.5	F55G1.15
T12A2.13	F52A8.3	F55G11.4
T12A7.4	F52B10.3	F55G11.6
T12A7.9	F52B11.3	F55G11.7
T12B3.1	F52C6.12	F55G11.8
T12B3.2	F52C6.14	F55H12.6
T12B5.10	F52C6.6	F56A11.7
T12B5.13	F52D1.2	F56A3.5
T12B5.7	F52D2.1	F56A4.10
T12B5.8	F52D2.10	F56A8.7
T12C9.6	F52D2.8	F56B3.2
T13A10.10	F52D2.9	F56C11.2
T13C2.3	F52E1.3	F56C11.6
T13C2.7	F52E1.9	F56C3.8
T13C5.7	F52E10.3	F56C4.3
T13F2.1	F52E4.4	F56C4.4
T13H2.4	F52E4.5	F56D1.6
T14B4.6	F52E4.6	F56D12.4
T14B4.7	F52F10.3	F56D2.5
T14B4.8	F52F12.5	F56D3.1
T14F9.4	F52F12.8	F56D5.1
T14G10.8	F52H2.3	F56D5.3
T14G12.2	F52H2.4	F56D6.14
T15B7.1	F52H3.1	F56D6.15
T15B7.11	F52H3.7	F56D6.2
T15B7.5	F53A2.2	F56D6.5
T15D6.12	F53A2.9	F56D6.7
T16G1.5	F53A3.3	F56E10.2
T16G1.6	F53A9.1	F56E3.3
T16G12.1	F53A9.2	F56F12.1
T17A3.9	F53A9.3	F56G4.7
T18D3.2	F53A9.5	F56H1.1
T18D3.9	F53A9.7	F56H11.3
T18H9.1	F53A9.9	F57A8.3
T18H9.2	F53B1.3	F57A8.4
T19A5.3	F53B1.4	F57B1.5
T19B10.1	F53B6.7	F57B10.8
T19B10.5	F53B7.7	F57B7.1
T19C3.2	F53C3.4	F57B7.2
T19C3.7	F53C3.7	F57B7.3
T19C4.1	F53E10.4	F57B9.3
T19C4.3	F53F1.6	F57B9.9
T19C9.1	F53F1.9	F57C12.1
T19C9.3	F53F10.1	F57C12.4
T19D12.1	F53F4.13	F57C7.3
T19D12.2	F53F4.17	F57E7.1
T19D12.4	F53F4.8	F57F10.1
T19D12.5	F53G12.13	F57F4.4
T19D7.3	F53G2.4	F57F5.3
T19D7.5	F53H4.3	F57G12.2
T19D7.6	F53H8.3	F57G8.5
T19E7.2	F54A5.2	F57H12.1
T19H12.12	F54B11.2	F57H12.2
T19H12.3	F54B8.1	F57H12.3
T20B12.5	F54B8.2	F57H12.5
T20B3.12	F54C1.1	F57H12.7
T20D3.2	F54C1.9	F58A3.1
T20D4.1	F54C8.7	F58A3.2
T20F5.3	F54C9.1	F58A3.5
T20G5.13	F54D1.1	F58A4.11
T20H12.1	F54D1.4	F58A4.14
T21B4.6	F54D1.5	F58A6.1
T21B4.8	F54D1.6	F58A6.4
T21C12.2	F54D10.6	F58A6.6
T21C12.8	F54D10.9	F58A6.8
T21C9.6	F54D12.10	F58A6.9
T21C9.8	F54D12.9	F58B4.1
T21D12.14	F54D8.1	F58B4.3
T21D12.2	F54D8.3	F58E1.6
T21D9.1	F54E2.2	F58E10.2
T21D9.2	F54E2.3	F58E10.7
T21E12.3	F54E4.4	F58E6.10
T21G5.2	F54F11.1	F58E6.11
T21G5.6	F54F11.2	F58E6.7
T21H3.1	F54F12.1	F58F12.4
T22B11.1	F54F2.1	F58F6.1
T22B11.2	F54F2.2	F58F9.1
T22B2.6	F54F3.1	F58F9.6
T22D1.11	F54F3.3	F58F9.9
T22F3.12	F54F3.4	F58G1.4
T22F3.8	F54F7.3	F58G1.5
T22F7.5	F54F7.7	F58G1.6
T22G5.1	F54F7.8	F58G1.7
T22G5.5	F54G2.1	F58G1.8
T22H6.4	F54G2.2	F58G4.1
T23B7.2	F54G8.3	F58G6.5
T23B7.3	F54H12.2	F58H1.2
T23D5.9	F54H12.4	F58H1.5
T23D8.2	F54H5.4	F58H1.6
T23E1.3	F55A11.5	F58H1.7
T23F1.4	F55A11.8	F58H10.1
T23F2.1	F55A12.2	F58H7.3
T23F6.3	F55A3.6	F58H7.8
T23G4.5	F55A4.2	F59A6.10
T24A6.15	F55A4.7	F59A7.1
T24A6.19	F55C5.1	F59A7.2
T24A6.4	F55C5.3	F59A7.5
T24A6.5	F55C9.3	F59B1.1
T24A6.6	F55D1.1	F59B1.8
T24B8.5	F55D1.2	F59B1.9
T24C12.1	F55D10.5	F59B10.1
T24C4.3	F55E10.1	F59B10.2
T24C4.4	F55E10.6	F59B10.3
T24C4.7	F55F1.3	F59B10.6
T24C4.8	F55F3.2	F59C12.1
T24D3.2	F55F3.4	F59C6.14
T24D8.4	F55F8.8	F59C6.6
T24E12.11	F55G1.15	F59C6.7
T24E12.2	F55G11.2	F59D12.1
T24E12.3	F55G11.6	F59D6.7
T24E12.5	F55G11.7	F59E11.12
T24H10.7	F55G7.3	F59E11.13
T25B9.1	F55H12.1	F59E11.5
T25B9.9	F55H12.3	F59E11.8
T25C12.3	F55H12.6	F59F3.4
T25C12.4	F55H2.1	F59F3.6
T25C8.2	F56A11.7	F59F5.6
T25D10.1	F56A3.5	F59F5.7
T25E12.12	F56A4.7	F59H6.6
T25E12.13	F56B3.2	F59H6.7
T25E4.1	F56B3.3	H01A20.1
T25F10.1	F56B3.9	H01G02.3
T25G12.6	F56B6.5	H01M10.2
T26C12.6	F56C11.2	H02F09.2
T26C5.1	F56C3.4	H02F09.3
T26C5.2	F56C4.1	H02K04.1
T26E3.7	F56C4.2	H02K04.2
T26E3.8	F56C4.3	H03A11.2
T26E4.12	F56C4.4	H03E18.1
T26H2.10	F56C9.8	H03G16.6
T26H5.5	F56D1.6	H04M03.2
T27A10.3	F56D2.5	H04M03.4
T27A10.6	F56D2.8	H05C05.3
T27A3.4	F56D3.1	H05G16.1
T27B7.4	F56D5.1	H05L03.3
T27C10.4	F56D5.9	H06A10.1
T27C4.3	F56D6.12	H06H21.10
T27C5.10	F56D6.15	H06H21.2
T27C5.5	F56D6.5	H06I04.6
T27C5.8	F56D6.7	H08J11.2
T27D1.1	F56E10.2	H08J19.1
T27E7.1	F56E10.4	H08M01.2
T28A11.12	F56E3.4	H09F14.1
T28A11.4	F56F11.3	H10D18.5
T28B4.2	F56F11.5	H10E21.4
T28B4.4	F56G4.7	H10E21.5
T28C12.2	F56H1.1	H11E01.1
T28C6.4	F56H11.1	H11E01.3
T28D9.9	F56H11.2	H12D21.9
T28F2.4	F56H11.3	H12I13.5
T28F2.7	F56H6.12	H12I13.6
T28F3.3	F56H6.2	H12I19.2
T28F3.4	F56H9.1	H13N06.2
T28F3.6	F57A8.1	H13N06.7
T28F3.8	F57A8.4	H14N18.1
T28H10.4	F57A8.8	H16D19.1
VC5.3	F57B10.8	H16O14.1
VK10D6R.1	F57B7.2	H19M22.2
VW02B12L.1	F57B9.9	H19M22.3
VY35H6BL.2	F57C12.4	H20E11.1
VZK822L.2	F57C7.4	H20E11.2
[truncated: 2,091 more rows]

## Sheet: TableS9C
Oligo-arrays
Up-regulated genes WS210					Down-regulated genes WS210
S. marcescens 24h	E. faecalis 24h	P.luminescens 24h	D. coniospora 12h		S. marcescens 24h	E. faecalis 24h	P.luminescens 24h	D. coniospora 12h
AC3.4	AC3.4	B0001.6	AC8.4		B0001.5	B0034.2	AC3.5	B0024.3
AC3.8	B0035.10	B0019.1	B0024.9		B0024.1	B0198.1	B0024.12	B0207.12
AC7.2	B0035.13	B0024.4	B0035.1		B0198.1	B0213.17	B0024.13	B0250.1
AH6.11	B0222.6	B0207.3	B0205.3		B0207.3	B0213.2	B0205.2	B0281.6
B0034.4	B0222.7	B0207.5	B0213.17		B0207.8	B0213.3	B0222.10	B0334.10
B0198.3	B0252.3	B0213.11	B0213.3		B0218.2	B0213.4	B0228.1	B0336.9
B0207.12	B0286.4	B0240.3	B0213.5		B0252.4	B0213.6	B0228.8	B0464.5
B0250.1	B0302.4	B0285.7	B0213.6		B0280.4	B0273.2	B0244.2	B0563.5
B0250.4	B0350.2	B0286.4	B0250.8		B0304.4	B0310.1	B0285.3	C01B10.1
B0286.4	B0432.12	B0348.4	B0280.5		B0350.2	B0353.1	B0304.6	C01B12.1
B0334.9	B0464.9	B0391.4	B0336.13		B0361.10	B0454.10	B0416.7	C01G10.13
B0344.2	C01G10.11	B0393.4	B0495.5		B0432.7	B0464.6	B0495.10	C01H6.8
B0395.2	C01G12.6	B0403.4	B0495.7		B0454.6	B0491.8	B0496.3	C02F12.7
B0462.2	C01G5.9	B0414.3	C01G10.8		B0495.4	B0513.4	B0523.5	C03A3.1
C01C10.4	C02A12.4	B0464.5	C02F5.3		B0507.8	B0513.6	C01B12.1	C03C10.9
C01G10.7	C02C6.2	B0545.1	C03A7.14		B0511.7	B0563.6	C01B4.9	C03D6.5
C02E7.10	C02E7.7	B0554.6	C03B1.10		B0523.5	C01C10.1	C01G12.7	C03G5.1
C02E7.4	C02F4.1	C01A2.6	C03B1.6		B0524.4	C01C7.1	C01H6.1	C03G6.7
C02F4.5	C03B1.6	C01B10.6	C04E6.12		C01B10.3	C01G8.1	C02A12.4	C04F12.9
C02F5.4	C03B8.4	C01C10.1	C05C10.2		C01F6.2	C01H6.1	C02C2.3	C05C8.1
C03A7.3	C03C10.9	C01C4.1	C05C10.5		C01G12.7	C02B10.1	C02F4.2	C05D12.1
C03A7.5	C03D6.4	C01G12.1	C05D11.13		C01G6.1	C02E7.1	C02F4.5	C05E11.6
C04E7.1	C03G6.15	C01G6.4	C06E1.5		C01H6.7	C02H6.1	C03A7.11	C06C6.5
C04E7.2	C04E6.7	C01G8.3	C06E8.3		C02E7.1	C03C10.2	C03A7.9	C07A9.10
C04F12.9	C05C10.4	C02B8.3	C06E8.5		C02F5.12	C03C10.3	C03G6.10	C07H6.9
C04F5.1	C05E4.9	C02F5.3	C06G4.2		C02G6.1	C03G6.18	C04E6.4	C08E3.10
C05C10.5	C05H8.1	C02F5.5	C07F11.2		C04A11.4	C03G6.9	C04F5.7	C08E3.6
C05H8.1	C06A5.4	C03C10.2	C08B6.10		C04B4.1	C04A11.4	C05A9.2	C08F1.1
C06B3.5	C06B3.3	C03E10.6	C08F11.8		C04E6.9	C04B4.1	C05D11.11	C09E10.2
C06C3.12	C06B8.2	C03G6.11	C09G4.3		C04F5.2	C04C11.1	C05E11.6	C09G12.5
C06H2.3	C06G3.5	C03G6.17	C09H10.5		C05C8.3	C04E6.2	C05E7.2	C09G4.2
C07G1.3	C06G4.2	C04C11.2	C09H6.1		C05D10.3	C04F1.1	C06A8.1	C09G9.4
C07G1.4	C07A9.7	C04F12.1	C10C5.5		C05E11.6	C04G2.10	C07F11.1	C10A4.6
C07G1.6	C07G3.5	C04F6.4	C10G11.6		C05E4.12	C05C12.1	C07G3.3	C10E2.3
C07G1.7	C08G5.2	C05C8.7	C10H11.6		C06B3.6	C05D11.8	C08B11.6	C10F3.7
C08B11.4	C09D1.1	C05D11.7	C11D2.6		C06B8.4	C06H5.1	C08F11.10	C10G8.6
C08H9.2	C09F5.1	C05D9.5	C13G3.3		C06E1.4	C07E3.5	C08F11.8	C10H11.7
C09G12.3	C09G12.3	C06A8.9	C14B9.10		C06G3.1	C08B6.8	C09B7.1	C11H1.5
C10A4.4	C10C5.1	C06B3.6	C14F5.3		C06G3.11	C08C3.2	C09F5.3	C12C8.1
C10C6.2	C10E2.6	C06C6.5	C15B12.8		C06G8.4	C08G5.1	C09G5.4	C12D8.8
C10G6.1	C10H11.4	C06G4.2	C15C8.2		C07A12.4	C09F5.3	C09G5.5	C13B7.2
C11E4.7	C11D2.1	C08E3.3	C15C8.6		C07A4.2	C09G4.5	C09H5.5	C13D9.4
C11H1.2	C13F10.5	C08E3.5	C16B8.1		C07A9.7	C09G5.4	C10H11.4	C13E3.1
C11H1.4	C13G3.3	C08E3.6	C16C2.4		C09B8.8	C09G5.5	C10H11.7	C13F10.5
C12D12.2	C14B1.5	C09E7.3	C16H3.3		C09F5.2	C09G5.7	C11G6.2	C14B9.8
C13A2.3	C14C6.2	C09F12.1	C17E4.4		C10E2.5	C10A4.3	C12C8.2	C15B12.3
C14A6.8	C14C6.5	C09G9.5	C17F3.1		C10G8.6	C10F3.1	C12D8.8	C15H9.8
C14E2.1	C14E2.5	C12D12.1	C17G10.6		C10H11.7	C10F3.2	C14B9.6	C16C2.2
C14E2.3	C15A11.1	C12D5.4	C17H1.5		C14B1.6	C10G8.4	C14E2.3	C16C4.8
C15F1.2	C15A11.3	C12D8.1	C24A11.1		C14B1.9	C11D2.6	C14F11.4	C18A3.4
C16A11.7	C15B12.6	C13D9.8	C25A1.6		C14B9.10	C11G6.2	C14H10.3	C18H9.2
C16A3.5	C15C8.3	C14A6.6	C26E6.1		C15B12.3	C13F10.1	C15A7.4	C24B9.2
C16C10.3	C15F1.7	C14E2.4	C27F2.10		C15F1.7	C13F10.7	C15B12.7	C24B9.9
C16C8.12	C16B8.3	C15A11.7	C29F9.4		C15H9.9	C14C11.5	C15C8.6	C25F9.9
C16D6.3	C16C2.2	C15F1.5	C30C11.4		C16C10.1	C14C6.4	C15H11.9	C27D6.3
C16H3.3	C16C8.13	C15F1.6	C30F8.4		C17C3.12	C14F11.7	C16C2.1	C27H5.7
C17A2.6	C17H12.13	C16A11.1	C31A11.3		C17C3.5	C14H10.3	C17B7.5	C28F5.1
C17A2.8	C17H12.6	C16B8.3	C32B5.6		C17E4.12	C16C4.11	C17C3.12	C28G1.2
C17H1.2	C18A3.4	C16B8.4	C32D5.4		C17E7.11	C16C4.12	C17G10.3	C29A12.1
C18A3.4	C18B2.5	C16C10.4	C33D3.3		C17G10.2	C16C8.16	C18A3.6	C29A12.2
C18B2.3	C18D1.2	C16D9.9	C33E10.1		C17G10.4	C16D9.5	C18B2.1	C29E6.5
C18C4.7	C18E9.7	C17C3.1	C34B2.8		C17G10.5	C17A2.1	C18E9.8	C29F5.4
C18D4.6	C18E9.9	C17F3.3	C34C6.3		C17H12.10	C17A2.4	C18G1.1	C29F7.1
C23G10.2	C18F10.9	C17F4.7	C34D1.4		C17H12.13	C17C3.12	C18H7.5	C29G2.6
C23G10.7	C18G1.2	C18B2.4	C38C10.5		C17H12.3	C17E4.10	C23F12.1	C30A5.10
C23H3.9	C18H7.2	C18D11.2	C43H6.1		C18H7.13	C17F4.5	C24A11.6	C30F12.2
C24H12.10	C23G10.6	C18E9.7	C43H6.4		C23H4.1	C18A11.6	C24B9.3	C31E10.3
C24H12.7	C23H4.1	C18H7.2	C44C11.1		C23H5.8	C18B10.7	C24F3.6	C31E10.7
C25A1.3	C24B9.9	C24H12.7	C45B11.1		C24B9.10	C18C4.1	C24H11.3	C32C4.3
C25A1.8	C24H11.8	C25A1.8	C45G9.5		C24G6.7	C18E3.8	C25A11.2	C33G8.5
C26C6.5	C25A11.4	C25E10.12	C46G7.4		C25A8.4	C18G1.7	C25H3.9	C34F6.3
C26C6.6	C25B8.4	C25E10.8	C47B2.3		C25G4.3	C24A11.6	C26C6.7	C34F6.7
C26C6.7	C25D7.2	C26B9.1	C48B4.10		C26B2.8	C24B9.1	C26G2.1	C34G6.6
C26F1.4	C26B9.1	C26F1.5	C49C3.10		C26C6.4	C24G6.3	C27A7.3	C35A5.3
C27A12.3	C26H9A.2	C27F2.7	C50F4.6		C26F1.2	C24H11.3	C27H6.4	C35B8.1
C28C12.13	C27D8.1	C28H8.9	C50H2.3		C26H9A.2	C25A11.2	C28C12.1	C35D10.1
C28G1.2	C28C12.5	C29E4.9	C52E4.4		C28C12.4	C25A11.4	C29E4.9	C35E7.1
C28H8.12	C28H8.2	C29E6.1	C55A1.3		C28D4.2	C25B8.1	C29F3.5	C36B7.5
C29E4.1	C28H8.7	C29F3.7	C55F2.2		C29A12.4	C25F9.8	C29F4.1	C36F7.1
C29E4.8	C29E4.2	C29F9.3	C56G7.1		C29A12.6	C26F1.3	C29F9.13	C37A2.8
C29F3.2	C29E4.7	C30E1.6	CC8.2		C29F4.1	C27C12.1	C29H12.3	C37A5.4
C29H12.1	C29G2.5	C30E1.7	CD4.3		C29F7.4	C27H5.1	C31H2.1	C38C3.2
C30A5.4	C31B8.13	C30F12.2	CD4.6		C29F9.1	C27H5.6	C32B5.16	C41G6.5
C30B5.6	C31C9.2	C31A11.3	D1007.12		C30B5.4	C27H6.4	C32F10.6	C42C1.5
C30G12.1	C31H5.1	C31E10.7	D1007.14		C30E1.2	C28D4.2	C32H11.6	C43D7.8
C30G4.5	C32A3.1	C32B5.3	D1014.2		C30E1.4	C29F9.12	C33C12.1	C43G2.2
C30H6.2	C32D5.9	C32D5.9	D1054.9		C30F12.6	C29H12.2	C33C12.9	C44H4.7
C30H6.4	C32E12.1	C32H11.7	D2092.2		C30F8.4	C30B5.1	C33D12.3	C44H9.5
C31E10.5	C33D3.5	C32H11.9	D2092.6		C32D5.9	C30B5.4	C33F10.8	C45E1.1
C31H1.6	C34B2.3	C33A11.4	DY3.1		C32E8.3	C30B5.5	C34E10.3	C48A7.1
C32B5.6	C34F11.6	C33D9.5	E01B7.2		C32F10.8	C30H6.10	C34F11.4	C48B4.12
C32E8.6	C34F6.10	C33H5.16	E04F6.3		C33C12.5	C31B8.6	C34F11.6	C49D10.6
C33A12.15	C35E7.9	C34B2.3	EEED8.11		C33G8.6	C31H2.4	C34F6.2	C49G7.10
C33D3.3	C36B7.3	C34D10.1	F01D5.8		C34B2.8	C32H11.3	C34F6.3	C50F2.1
C33E10.1	C36C5.15	C35E7.5	F01G12.2		C34B4.1	C33B4.2	C35A5.3	C53A5.6
C33F10.11	C39E6.2	C36A4.9	F08H9.3		C34B7.4	C33H5.18	C36B1.9	C53A5.9
C33F10.2	C39E9.10	C36E8.1	F09E8.2		C34E10.10	C34B2.8	C36B7.4	C53B4.5
C33H5.19	C40H1.5	C37A2.8	F09F7.8		C34E11.3	C34E10.7	C36B7.5	C54G4.3
C34D1.2	C41D11.6	C38C6.2	F09G8.6		C34E7.4	C34F11.9	C36C5.5	C55B7.10
C34G6.6	C42C1.6	C38D4.8	F10A3.5		C34F6.10	C35B8.1	C36F7.1	C55C2.1
C35C5.3	C42D8.5	C38D9.1	F10D7.2		C35C5.9	C35D10.3	C37C3.7	D1005.3
C35D10.6	C43D7.5	C39B10.1	F10D7.3		C35D10.15	C36F7.1	C38C5.1	D1022.3
C35D10.7	C43H6.1	C39B10.2	F10E7.2		C36A4.2	C37A5.7	C38C6.5	D2021.1
C35E7.10	C43H6.7	C39B5.12	F11G11.3		C36C5.11	C37C3.6	C39D10.8	D2021.4
C36B7.1	C44B7.6	C39B5.6	F13A2.1		C36F7.1	C37H5.9	C39E6.1	D2062.2
C36C5.3	C44C10.1	C41D11.3	F13D12.2		C37A2.8	C38C3.5	C39E9.2	E03E2.1
C37C3.12	C44C3.2	C43H6.7	F14B8.4		C37E2.2	C39B5.1	C39E9.9	E03H4.5
C37E2.3	C44C8.6	C44H4.3	F14D2.11		C39E6.2	C39D10.8	C39H7.1	E03H4.6
C38C6.5	C44H9.5	C44H9.6	F14D2.2		C40A11.8	C39H7.7	C39H7.5	F01G4.2
C39B5.10	C45B2.6	C45B2.1	F14D7.2		C40H5.1	C43E11.1	C39H7.6	F02G3.1
C42D4.5	C45G7.4	C45E1.4	F14H3.6		C41C4.5	C44B12.1	C40H1.2	F07A11.4
C43E11.10	C45G9.6	C45G7.2	F15A2.2		C41D7.1	C44C10.3	C43F9.7	F08G5.3
C43E11.2	C46F2.1	C45G7.3	F15C11.2		C42D4.1	C44C10.9	C44F1.2	F09F3.5
C44B7.3	C46H11.2	C45G9.2	F15D4.4		C42D8.8	C45H4.12	C45H4.14	F09G2.4
C44C11.1	C47E12.6	C46C2.4	F15E11.1		C43H6.7	C46E10.1	C47A10.6	F10B5.6
C44C8.7	C49A9.5	C46E10.8	F15E11.10		C44B7.9	C47A10.6	C47D12.4	F10F2.6
C44E12.1	C49F5.6	C47A10.8	F16B12.6		C44F1.2	C47B2.1	C48B4.9	F10G7.10
C45E5.6	C49G7.3	C47A4.3	F18C5.1		C44H9.5	C49D10.4	C49G7.4	F11C1.4
C46G7.4	C50B6.7	C47B2.6	F19F10.12		C45G7.4	C49G7.12	C50C10.4	F11C7.3
C46H3.2	C50F7.5	C47C12.3	F20B6.9		C45G9.13	C49H3.10	C50H11.13	F11H8.4
C47A4.5	C52B9.7	C48B4.1	F20E11.1		C45H4.3	C49H3.5	C50H11.7	F14D2.7
C48B4.2	C52E2.8	C49A9.5	F20H11.6		C46F11.5	C50F2.4	C50H2.4	F15A4.4
C49A1.5	C52E4.1	C49C3.4	F21E9.6		C47A10.3	C50H11.3	C51E3.4	F15G9.2
C50B6.11	C53B7.3	C49C3.9	F21H7.1		C47D12.4	C50H11.5	C52E2.1	F16B12.4
C50E10.5	C53D5.4	C49D10.11	F22B7.4		C47E12.6	C50H2.1	C53A5.11	F16D3.2
C50F7.4	C54C6.5	C49G7.10	F23H11.8		C48E7.3	C51E3.6	C53B4.5	F16G10.14
C51E3.1	C54D2.5	C50A2.4	F25B5.1		C49A1.1	C51F7.1	C54D10.3	F16G10.6
C52E4.5	C54G4.7	C50E10.7	F26B1.3		C49A9.7	C52A11.2	C54F6.10	F17A2.12
C53A3.1	C55A1.6	C50F4.7	F26D10.10		C49H3.10	C54D10.5	C54F6.14	F18E2.3
C54A12.2	C55F2.1	C50F7.2	F26D11.12		C50D2.3	C54G6.5	C54G10.4	F21A3.1
C54A12.4	C56E6.3	C50F7.5	F26D11.13		C51E3.6	C54H2.3	C54G4.2	F21F8.10
C54D10.14	C56G7.1	C50H11.3	F26E4.8		C52E2.6	C55B7.4	C55B7.4	F21F8.11
C54G10.3	D1014.3	C50H11.5	F26F12.2		C52E4.1	C56G2.15	C56G2.15	F22E5.1
C54G4.5	D1081.6	C52E12.4	F26F2.6		C53B4.5	D1025.2	cTel55X.1	F23H12.8
C55A1.8	D1086.18	C52E4.3	F26G1.2		C53C11.2	D1054.11	D1005.3	F25B3.1
C56E6.6	D2089.2	C53A5.16	F28D1.10		C53D5.3	D1054.8	D2023.2	F25H8.3
D1025.2	DH11.5	C53A5.17	F28F8.6		C54G6.5	D2023.5	D2092.6	F26F2.4
D1037.4	DY3.4	C53D6.2	F29G9.2		C55B7.4	D2024.7	DH11.2	F26F4.3
D1054.10	E01B7.2	C54A12.2	F32D1.8		C55F2.1	D2045.5	E01G4.6	F27C1.8
D1086.18	E01F3.1	C54C8.9	F32E10.2		C56G2.6	D2089.1	E02C12.12	F27D9.2
D2062.1	E01G4.3	C54D1.4	F33D11.9		C56G7.2	D2092.2	E02C12.4	F28A10.8
E03G2.2	E02C12.11	C54F6.5	F33D4.2		CD4.1	D2092.8	E04F6.11	F28B12.2
E03H12.4	E02C12.9	C54G4.4	F33E11.6		cTel55X.1	D2096.7	F01F1.14	F28C6.7
E04A4.7	E04A4.7	C55A6.6	F35B12.4		D1005.3	DH11.4	F02E11.4	F29A7.5
E04A4.8	E04F6.3	D1054.10	F35E8.11		D1007.10	E02C12.8	F07C4.7	F29A7.6
EEED8.3	E04F6.9	D1069.1	F35F11.1		D1025.7	E02D9.1	F08F3.10	F30A10.9
F02D10.1	EEED8.8	D2062.6	F35G12.10		D1054.9	E02H4.7	F08F3.2	F30F8.9
F02H6.6	F01F1.2	D2085.1	F35H8.5		D1086.6	E03H4.7	F08F3.7	F31D4.8
F07C4.12	F01F1.9	D2092.4	F36G9.1		D2023.1	E04A4.1	F08F8.9	F31E9.1
F07G11.5	F01G4.6	E01F3.1	F39H11.3		D2092.2	F01F1.6	F09C3.5	F32A5.4
F08B1.3	F07C3.7	E04F6.3	F40D4.3		D2096.7	F01G12.1	F09F7.2	F32B5.8
F08C6.5	F07D10.1	E04F6.7	F40E10.3		DY3.4	F02C12.2	F09G8.3	F32B6.2
F08G12.4	F07H5.4	E04F6.9	F40E3.5		E04A4.6	F07F6.4	F10G2.8	F34D10.6
F08G12.8	F07H5.8	EGAP7.1	F42A6.9		E04F6.12	F07F6.9	F11A5.1	F34D6.6
F09C11.1	F08B6.2	F01D4.2	F42A9.5		EEED8.15	F07G6.5	F11C7.3	F34H10.2
F09E8.7	F08H9.8	F02A9.6	F42E11.2		EEED8.8	F07H5.13	F11E6.3	F35C5.4
F09F9.2	F09B12.3	F02D10.4	F42F12.4		F02D8.4	F08A8.1	F11G11.11	F35C5.6
F10A3.5	F09E10.3	F07A11.4	F42G9.9		F07C4.6	F08F8.1	F11H8.3	F35D2.5
F10D2.9	F09E8.1	F07C3.3	F43C11.5		F07F6.1	F08F8.6	F12A10.9	F36D3.2
F10D7.2	F09G8.3	F07E5.5	F43E2.1		F08B12.3	F08G12.2	F12F6.2	F36D3.4
F10D7.4	F10A3.2	F07E5.6	F43G6.8		F08B12.4	F08G12.3	F12F6.3	F36H12.16
F10E9.5	F10E9.8	F08B12.1	F43G9.4		F08B4.4	F09A5.4	F13B9.8	F36H9.3
F13A7.7	F10G2.9	F08C6.2	F43G9.9		F08D12.10	F09F3.3	F13D11.1	F37B1.6
F13A7.8	F10G8.5	F08F1.8	F44A6.4		F08D12.3	F09F9.4	F13D12.2	F37C12.9
F13D12.8	F11D5.6	F08G12.4	F44C4.4		F09A5.1	F10D2.1	F13E6.3	F38A6.3
F13E9.4	F13B12.5	F08G5.6	F45F2.4		F09G8.5	F10E7.4	F13E9.14	F39C12.1
F13E9.5	F13B9.8	F09G8.4	F45H7.2		F10C1.3	F10G2.2	F13E9.15	F39E9.12
F13H6.4	F13D12.8	F10C2.3	F46C8.6		F10E7.4	F11A10.4	F13E9.16	F39G3.1
F14B6.5	F13E9.2	F11A6.2	F46F11.2		F10E9.2	F11D5.1	F14B8.4	F39H2.2
F14B6.6	F13G3.9	F11C1.2	F46F2.1		F10F2.3	F11E6.3	F14D2.4	F40B5.2
F14D2.2	F13H10.4	F12A10.3	F46H5.8		F10G8.5	F11H8.3	F14D2.8	F40F9.8
F14F8.6	F13H6.3	F12F6.9	F47B3.3		F10G8.9	F12B6.1	F14F11.1	F41D9.1
F15A4.12	F14B6.1	F13A7.3	F48C1.4		F11C7.3	F13A7.9	F14F7.1	F41H10.3
F15C11.2	F14B8.4	F13D12.6	F48C1.5		F11D11.7	F13E6.4	F14F8.9	F42A10.8
F15D3.4	F14D7.7	F13G11.2	F52E1.1		F11H8.3	F13E9.3	F15A2.1	F42D1.3
F15D4.2	F14F9.2	F13H6.3	F53A9.1		F12D9.2	F14D2.2	F15A4.7	F42G4.3
F15D4.4	F15D3.4	F14D12.4	F53A9.8		F12E12.2	F14F3.1	F15E11.1	F43D9.3
F18C12.1	F16C3.1	F14E5.5	F53F10.2		F13B12.5	F14F7.1	F15E11.12	F43D9.5
F18C5.1	F17E9.11	F14F11.2	F53H2.2		F13G11.2	F14F8.4	F15E11.14	F43G6.7
F18G5.1	F18A1.1	F14H3.10	F54F2.5		F14D2.8	F15A4.9	F15E6.8	F43G9.5
F19G12.1	F18A12.8	F15B10.2	F55C12.1		F14F11.2	F15B9.2	F15H10.2	F44E7.5
F20B10.1	F18E9.6	F15D4.4	F55H12.4		F14F3.3	F15D4.4	F15H10.4	F45H10.5
F20B6.3	F19B10.11	F16H11.5	F56C9.6		F14F8.3	F15E11.1	F17A9.1	F46F5.14
F20D6.5	F19B2.5	F17C11.8	F56D1.7		F14F8.8	F15E11.14	F17B5.10	F47D2.10
F20E11.1	F19H8.3	F17E5.2	F56D5.6		F14H8.6	F15E6.8	F17C8.2	F47F2.1
F21C10.6	F20A1.10	F17E9.11	F56E10.2		F15A2.1	F15H10.2	F17H10.3	F47F2.2
F21C10.8	F21C10.10	F18C5.10	F58A3.1		F15A4.8	F15H10.8	F18A11.5	F48E3.9
F21D9.4	F21C10.11	F19B2.5	F58E2.9		F15D3.8	F16G10.1	F18C12.1	F48G7.7
F21H11.2	F21F3.1	F19C7.1	F58F12.3		F15H10.7	F17C11.8	F18E3.7	F49B2.3
F21H12.6	F21F8.3	F19C7.7	F59A2.1		F16B12.5	F18A1.7	F19F10.5	F49C12.13
F22B7.1	F21F8.7	F19G12.1	F59A3.1		F16B12.7	F18C12.1	F21C10.1	F49D11.6
F22D6.12	F21H11.3	F19G12.7	F59A3.10		F17A2.13	F18E3.2	F22B7.5	F49H6.10
F22D6.9	F21H7.2	F21D12.1	F59H6.9		F19B10.13	F19C6.2	F23D12.11	F52D10.5
F23B12.1	F22D6.2	F21F8.3	H01G02.4		F19B6.1	F19C6.5	F23D12.5	F52H2.3
F23F1.4	F22F4.2	F21F8.7	H02I12.1		F19F10.3	F20B6.4	F23F1.7	F53A2.8
F23F1.6	F23H12.4	F21G4.6	H02I12.3		F19F10.4	F20H11.2	F23F12.12	F53G12.6
F23H11.4	F23H12.6	F21H12.6	H04M03.1		F21A3.4	F21G4.4	F23H12.7	F53G12.7
F23H12.3	F23H12.8	F21H7.1	H05C05.2		F21A3.5	F21H12.3	F25B5.3	F53G2.4
F23H12.8	F25B4.2	F22B7.1	H20J04.5		F21A3.6	F23A7.4	F25D7.1	F53G2.6
F25B5.4	F25C8.3	F22B7.3	JC8.13		F21E9.3	F23D12.11	F25F2.1	F53G2.8
F25E2.5	F25E2.4	F22F1.1	K01A6.6		F21F12.1	F23H11.3	F26A3.4	F54A3.3
F25E5.14	F25H8.6	F23A7.6	K02B12.7		F21F3.3	F25B3.5	F26A3.8	F54C8.3
F25E5.3	F26A10.2	F23H11.3	K03A11.2		F21G4.3	F25H9.6	F26B1.4	F55C5.3
F25H2.10	F26A3.4	F25B3.5	K04F10.4		F21H7.4	F26B1.4	F26F12.1	F55C5.4
F26F2.6	F26D2.13	F25C8.3	K04G2.8		F22B7.4	F26D2.1	F27C1.8	F56A11.3
F26G1.4	F26E4.11	F25H9.1	K05C4.7		F22E5.1	F26F12.1	F27D9.8	F56B3.1
F27C8.3	F27C1.4	F26A10.2	K06A4.6		F22E5.11	F26F4.3	F28A10.3	F56D5.10
F27C8.5	F27C1.7	F26B1.7	K06A5.4		F22F7.5	F28B3.1	F28A10.6	F56D5.3
F28B1.1	F27D4.5	F26G5.5	K06C4.6		F23A7.4	F28C12.4	F28C10.4	F56D5.5
F28C10.3	F27E5.1	F26G5.9	K07A1.10		F23B12.7	F28H1.3	F28D1.5	F56H1.5
F28H6.4	F28A12.4	F27B10.1	K07C11.1		F23F12.9	F28H7.11	F28H7.1	F57B9.3
F29A7.3	F28B4.3	F27C8.4	K07D4.3		F23H12.1	F29C4.2	F29C12.6	F57F4.2
F29B9.10	F28D1.5	F27D4.6	K07D4.6		F25H8.6	F30A10.5	F29C4.2	F58A3.4
F30A10.3	F29C4.7	F27E5.4	K07E3.3		F26B1.8	F31B9.2	F31E9.3	F58A4.3
F30F8.9	F31F7.1	F28B4.3	K08H10.4		F26D11.2	F31E8.2	F31F4.15	F58A6.9
F31A3.3	F32A7.3	F28C1.2	K09G1.3		F26F12.1	F31F4.9	F32A5.2	F58B6.1
F31C3.4	F32B5.6	F28D9.4	K10C3.4		F26F2.5	F32A7.6	F32B4.6	F58F6.1
F32H2.8	F32G8.6	F30A10.4	K10D2.2		F27D4.6	F32B4.8	F32G8.5	F58G4.6
F32H5.7	F32H5.1	F30B5.7	K11C4.5		F28A12.4	F32D1.10	F34D6.2	F59A2.2
F33A8.3	F35B3.4	F31D5.3	K12G11.3		F28B1.2	F33D11.1	F35C8.8	F59E12.12
F33D11.6	F35C5.6	F32A7.1	M01D1.10		F28B4.1	F33D11.9	F35E12.3	H09F14.1
F33D11.9	F35E2.5	F32E10.3	M01E11.5		F28D1.11	F33H2.5	F35E12.4	H17B01.1
F33D4.5	F35H12.3	F32E10.8	M01E5.5		F28F5.6	F33H2.8	F35E2.9	H25K10.4
F34D6.4	F36A2.3	F32H2.4	M02B1.3		F28H1.2	F34D6.3	F35H10.3	H28G03.3
F35C12.3	F36D3.9	F33D11.6	M03E7.4		F28H7.2	F35B3.1	F36A4.10	H32C10.3
F35C8.3	F36G9.10	F35A5.2	M110.5		F29D10.3	F35E8.8	F37A4.5	K01A12.2
F35E2.5	F36H5.2	F35C5.6	M28.5		F31A3.5	F36F12.5	F37A8.2	K01A2.11
F35E2.6	F36H9.4	F35C5.9	M88.3		F31F4.13	F36F2.3	F38B2.2	K02B12.3
F35F10.14	F37A4.5	F35E12.7	R01E6.5		F32D1.2	F37A8.2	F38B2.6	K02D3.2
F35G12.2	F37A4.7	F35E8.11	R02F11.1		F32G8.5	F37B1.4	F38B7.6	K02E7.6
F35G12.3	F38A1.13	F35E8.8	R05H5.3		F33D4.2	F37B4.7	F38C2.4	K02H11.4
F36H1.3	F38C2.1	F36D3.8	R07B1.6		F33G12.2	F37C4.2	F38E1.10	K03H1.4
F36H5.8	F38G1.1	F36H12.2	R07C3.4		F35C5.7	F37C4.5	F39F10.3	K04F1.15
F37B4.7	F39H12.2	F37B12.3	R08A2.3		F35D11.5	F38A1.1	F39G3.6	K06A4.3
F37C12.13	F39H2.1	F37C12.1	R08D7.3		F35F10.10	F38B6.5	F39H2.5	K08A8.2
F38A1.11	F39H2.2	F37C4.5	R08E5.4		F35H8.7	F38C2.4	F40G12.9	K09D9.7
F38A1.4	F40F12.7	F38A1.10	R09B5.9		F36A4.10	F38E11.9	F40H3.4	K09F5.5
F38A5.13	F40F4.4	F38B6.6	R09D1.10		F37A4.6	F38H12.3	F40H7.8	K09H11.6
F38B2.1	F40F4.6	F38C2.1	R10E12.1		F37A8.2	F39C12.2	F41E6.2	K09H9.3
F38H4.9	F40G12.2	F38E9.2	R10E12.2		F37B4.6	F39E9.3	F41E7.4	K10F12.8
F39B3.2	F40G9.15	F39G3.3	R10E4.4		F37B4.9	F39G3.4	F43B10.1	K10G4.3
F39D8.3	F41B5.10	F40A3.3	R10H1.1		F37C12.17	F39H2.5	F43E2.5	K11G12.4
F40B1.2	F41E6.1	F40A3.5	R11A8.2		F38E9.1	F40B5.2	F43G6.7	K12B6.8
F40E10.3	F41E6.11	F40B1.1	R11A8.7		F38H4.6	F40E10.2	F44C8.10	M01E5.4
F40F9.5	F41F3.3	F40F4.6	R11G1.4		F39H2.2	F40F11.4	F44C8.7	M01F1.7
F40F9.6	F41G4.7	F40F8.7	R148.3		F40E10.4	F40F9.4	F44D12.4	M02B7.6
F40H7.1	F41H10.7	F40F9.2	R151.2		F41F3.3	F40F9.7	F44E2.7	M05D6.7
F40H7.10	F42F12.1	F40F9.6	R151.7		F41F3.4	F41E7.4	F44E5.1	M176.6
F41B5.7	F42H10.2	F40G9.11	R31.3		F42F12.1	F42A6.6	F44G3.7	M79.1
F41D3.9	F43E2.7	F40H7.4	R52.10		F42F12.7	F42C5.6	F45E4.11	R01H10.8
F41G3.12	F43G6.10	F41A4.1	T01B11.4		F42F12.9	F42E11.3	F45H10.5	R03E9.2
F41G3.6	F43G6.3	F41B5.9	T01C3.3		F43B10.2	F42G8.10	F46B6.4	R04A9.3
F42A10.5	F44A2.1	F41E6.1	T01G9.6		F43E2.5	F43C11.3	F46C8.2	R05D8.3
F42A10.8	F44A2.3	F42A10.1	T03F1.5		F43G6.7	F43H9.3	F46E10.1	R05F9.7
F42A8.1	F44B9.1	F42A6.4	T04C12.2		F44B9.1	F44A2.2	F46F2.3	R07B7.13
F42G10.2	F44C4.3	F42A6.6	T04D1.3		F44B9.5	F44E2.10	F46F6.1	R08H2.8
F43C1.3	F44F4.7	F42E8.1	T04D3.1		F44D12.6	F45E12.1	F46H5.3	R09A8.4
F43C11.4	F45D11.10	F42F12.1	T04F8.8		F44F4.1	F45E6.1	F47A4.1	R09B3.2
F43C9.3	F45E4.6	F42F12.9	T04H1.4		F45C12.13	F45G2.9	F47B7.7	R09F10.6
F43G6.1	F46A9.2	F42G4.2	T05A10.1		F45H11.2	F46E10.9	F49E11.9	R10E8.4
F43G9.11	F46B6.10	F42G8.4	T06C12.7		F46B6.10	F46F11.2	F49H6.7	R10F2.5
F43G9.3	F46C3.4	F42G9.4	T07H3.6		F46E10.10	F46F2.3	F52C9.1	R12E2.14
F43H9.2	F46C3.5	F42G9.6	T08B2.12		F46H5.8	F46F5.12	F52D10.4	R13A1.8
F44A2.1	F46F11.5	F43D2.4	T08G5.10		F47B8.4	F46F5.16	F52F12.2	R13H9.5
F44A2.4	F46H5.2	F43D9.5	T10B11.7		F47D12.5	F47B10.2	F52H3.2	R155.4
F44C8.8	F47E1.3	F44A2.1	T10F2.4		F47F2.3	F47D2.3	F53A9.10	R52.1
F44E2.9	F48C11.1	F44A2.3	T10H9.6		F47G3.1	F47D2.9	F53B1.6	R90.4
F44G3.12	F48F5.2	F44B9.3	T12A2.11		F47G3.3	F47F6.1	F53F1.1	T01B7.7
F44G3.13	F48F5.3	F44B9.8	T12B5.1		F48F5.2	F47H4.4	F53F4.13	T01D3.4
F44G3.14	F49E10.4	F44D12.2	T13G4.4		F48F5.3	F48D6.4	F53G12.7	T02E1.7
F45E6.2	F52A8.1	F44E7.2	T13H5.7		F48G7.5	F48E8.7	F54C1.7	T03E6.1
F45E6.3	F52B10.1	F44F1.7	T15B7.2		F49D11.2	F49E8.3	F54D11.1	T03F7.2
F46F11.9	F52B11.3	F44G3.6	T17H7.4		F49E8.3	F49F1.8	F54D5.12	T05C3.5
F46F2.1	F52D10.3	F44G4.8	T19B4.2		F52A8.6	F49H6.1	F54E4.1	T05D4.1
F46F3.1	F52H3.3	F45D11.14	T19D2.3		F52D2.10	F52F12.2	F54F2.1	T05E11.6
F46F5.10	F52H3.7	F45D3.4	T19E10.1		F52D2.8	F52G2.1	F54F3.1	T07A9.12
F46F5.8	F53A2.3	F45E4.3	T19F4.1		F53A9.7	F52H2.4	F55A11.5	T07C12.5
F46G10.4	F53A9.1	F45E6.2	T22B11.2		F53H4.2	F53A2.11	F55C10.3	T07C12.8
F48G7.10	F53A9.6	F46A9.5	T22B7.1		F54A3.2	F53C3.13	F55C9.8	T08B6.6
F49C12.12	F53A9.7	F46C5.2	T22C1.2		F54B8.12	F53F1.1	F55H2.7	T10D4.12
F49C12.3	F53A9.8	F46C5.4	T22H2.6		F54C8.4	F53G12.7	F56A4.12	T11B7.1
F49C12.4	F53A9.9	F46F3.1	T24D11.1		F54D11.1	F53H2.1	F56B6.6	T12E12.2
F49C12.5	F53B3.3	F46G10.1	T26C5.1		F54E4.2	F53H2.2	F56H6.11	T13C5.3
F49C12.6	F53B6.4	F47B3.7	T26G10.4		F55A4.5	F53H4.2	F57B1.3	T15H9.4
F49E12.8	F53F1.5	F47B8.1	T27E4.4		F55B11.2	F54B3.3	F57B1.4	T19D7.4
F49E2.1	F53F10.2	F47C10.2	T27E9.1		F55B11.4	F54D1.4	F57B10.3	T20B5.2
F49H12.2	F53H4.5	F48C1.9	T28F12.2		F55C10.1	F54D11.1	F57B7.3	T22C1.10
F49H6.11	F54C9.10	F48D6.4	T28F3.1		F55C10.4	F54D5.12	F57C9.2	T22F3.11
F52B5.2	F54C9.3	F48E8.1	W01B6.1		F55C7.7	F54F11.3	F58A6.9	T23B3.2
F52C6.11	F54D10.4	F49D11.10	W02B12.3		F55C9.11	F54F2.9	F58E1.9	T24C4.5
F52D10.3	F54D10.9	F49E12.10	W02D3.2		F55C9.4	F55A11.5	F58E10.5	T24H7.3
F52E1.1	F54D5.3	F49H6.3	W02D7.8		F55C9.6	F55C10.3	F58E6.12	T27A3.1
F52E1.9	F54D5.7	F52D1.2	W03F9.1		F56B3.7	F55D12.4	F58E6.13	T27C5.8
F53B2.1	F54D8.1	F52E1.7	W03G9.4		F56C9.11	F55H12.3	F58F6.1	T28A11.11
F53B2.6	F54D8.3	F52F12.7	W04A8.6		F56C9.7	F56C3.7	F58F6.2	T28B8.1
F53B6.8	F54E2.6	F52H3.1	W04B5.2		F56D6.5	F56D1.6	F58G1.6	T28D9.11
F53C3.5	F54F11.2	F53A2.5	W05E10.1		F56H1.2	F56D6.5	F58G6.2	T28H11.3
F53H10.2	F54F3.1	F53A9.2	W05E7.1		F56H9.2	F56F12.1	F59A7.3	W01F3.3
F53H2.1	F55F3.3	F53A9.8	W07B3.2		F57B10.3	F56H11.6	F59B1.6	W02A11.8
F53H8.4	F56B3.8	F53B2.6	W08E12.7		F57B7.3	F57B1.2	F59B10.4	W02D7.11
F54D7.3	F56C11.6	F53F1.8	W09D10.4		F58A6.9	F57B1.3	F59C6.7	W02H5.5
F54D8.3	F56C4.2	F53G2.4	W09D6.1		F58B3.8	F57C9.7	H01M10.2	W03B1.2
F54H12.4	F56D1.5	F54C8.6	W09D6.6		F58B6.3	F58A4.10	H06I04.3	W03B1.8
F55C5.1	F56F10.3	F54C9.3	W10D5.3		F58G1.4	F58B3.4	H12I19.4	W03D2.9
F55D1.1	F57A8.1	F54D5.11	W10G11.4		F59B10.4	F58B6.3	H17B01.2	W03F11.5
F55F8.9	F57C7.4	F54D5.3	Y102A11A.1		F59B2.11	F58E1.12	H23L24.3	W03G1.7
F56B3.12	F57F4.3	F54D5.4	Y105C5B.18		F59C6.2	F58E1.7	H28G03.3	W05B2.1
F56C11.5	F57F5.1	F54D7.2	Y105E8A.22		F59C6.4	F58E10.5	H32C10.3	W05B2.4
F56C3.7	F58A6.11	F54E2.1	Y106G6E.6		F59E12.12	F58E2.5	H35B03.2	W05B2.6
F56D1.2	F58B3.1	F54F7.6	Y111B2A.14		F59F4.2	F58F6.1	H38K22.2	W06B11.4
F56D12.4	F58B3.2	F55A11.4	Y111B2A.18		F59G1.5	F58H7.3	H42K12.3	W06D4.3
F56D2.4	F58D2.2	F55A4.10	Y113G7B.23		H03E18.1	F59A1.4	JC8.6	W06G6.6
F56F11.4	F58D5.2	F55B11.4	Y12A6A.2		H05L03.3	F59A6.4	K01A2.6	W07A8.1
F56F4.8	F58E1.4	F56A8.6	Y17G7B.19		H08M01.2	F59D12.3	K01A6.4	W09H1.4
F56H1.4	F58E1.9	F56B3.5	Y17G7B.9		H09F14.1	F59E10.2	K01D12.1	W10C8.5
F56H6.11	F58G6.7	F56F12.1	Y17G9A.1		H12I13.1	H02I12.1	K02D7.3	W10D9.1
F57C7.1	F58H1.4	F56H9.2	Y18D10A.17		H14E04.1	H04M03.8	K02E11.2	Y105C5B.15
F57F4.3	F59A1.6	F57A8.1	Y18D10A.19		H17B01.1	H08M01.2	K02E2.4	Y105C5B.4
F57G8.8	F59C12.2	F57B1.5	Y19D10B.4		H17B01.2	H10D18.5	K02E2.7	Y105E8A.13
F57H12.5	F59D6.3	F57C12.4	Y23H5A.5		H22K11.1	H11L12.1	K02F2.6	Y106G6H.2
F58A3.2	F59F4.2	F57F4.4	Y23H5A.8		JC8.4	H14E04.1	K02G10.4	Y113G7A.12
F58B3.7	H06O01.1	F58B3.6	Y23H5B.12		JC8.8	H27D07.1	K03H1.4	Y113G7B.7
F58D5.5	H10E21.4	F58E1.14	Y24D9A.6		K01A2.10	H35B03.2	K03H4.2	Y113G7B.9
F58E2.7	H22K11.1	F58G1.4	Y32B12B.2		K01A2.8	K01C8.1	K03H9.2	Y116A8A.6
F58E2.9	H27D07.5	F58G11.6	Y32F6B.3		K01A6.2	K02C4.3	K04C1.1	Y116A8C.12
F58E6.7	H28G03.1	F58H7.8	Y37E11AM.2		K01C8.2	K02D7.3	K04D7.3	Y17D7B.1
F58G4.2	H32C10.3	F59A1.4	Y37E11B.1		K02A11.3	K02E2.4	K04E7.2	Y18D10A.4
F58G6.1	H34I24.2	F59A1.6	Y38C1AA.1		K02B12.6	K02F2.2	K04E7.3	Y18H1A.9
F58H12.1	H36L18.2	F59B1.8	Y38C1AA.2		K02B7.3	K03B8.8	K05B2.3	Y22D7AL.13
F58H7.3	JC8.8	F59B2.11	Y38C1BA.2		K02F2.2	K03D7.4	K05F1.7	Y22D7AR.5
F59A1.3	K01A2.11	F59E11.7	Y38E10A.4		K03F8.2	K03E5.2	K06A5.2	Y26D4A.8
F59A2.1	K01A2.8	F59E12.3	Y39A1C.2		K03H1.4	K04C1.5	K06G5.2	Y34B4A.4
F59E12.11	K01H12.2	F59G1.1	Y39E4B.3		K04F10.4	K04E7.3	K07C5.5	Y37B11A.2
F59F5.5	K02B12.7	H03A11.2	Y39E4B.9		K04G2.1	K04F1.2	K07F5.2	Y37E11B.6
H02I12.1	K03H1.3	H04M03.8	Y39G10AR.17		K05F1.7	K04F1.7	K07F5.3	Y37F4.6
H03G16.2	K04A8.6	H06I04.1	Y40C5A.3		K06A4.7	K05F6.1	K07F5.9	Y38C1BA.1
H10D12.2	K04F1.13	H06O01.1	Y40H7A.11		K07A12.3	K06A5.4	K08B5.1	Y38E10A.7
H12C20.2	K04F10.4	H10E21.1	Y41D4A.5		K07C6.5	K07A12.2	K08D12.6	Y38H6C.1
H16O14.1	K05C4.6	H17B01.1	Y41D4B.16		K07E3.8	K07C11.3	K08F4.8	Y38H6C.18
H20J04.7	K05C4.7	H20J04.3	Y41D4B.17		K07F5.1	K07H8.1	K08G2.6	Y39A1A.1
H35B03.2	K05F1.2	H22K11.1	Y41D4B.19		K07F5.11	K08B4.4	K08G2.7	Y39A1C.4
K01H12.3	K05F1.7	H35N09.2	Y41D4B.9		K07F5.2	K08B4.5	K09F5.2	Y39C12A.1
K02A4.2	K05F6.2	JC8.8	Y43C5A.5		K07F5.3	K08C7.4	K09F6.9	Y39D8C.1
K02E11.4	K06A5.3	K01D12.11	Y43F8C.9		K07F5.6	K08E4.4	K09G1.2	Y40A1A.2
K02E7.10	K06G5.1	K02E7.4	Y44A6D.3		K07F5.9	K08F8.3	K09G1.4	Y40B1A.2
K02F3.1	K07A1.3	K02F6.2	Y45F10A.6		K08B4.3	K09E4.3	K10G4.13	Y41C4A.7
K02F6.2	K07B1.8	K04A8.10	Y45F10D.2		K08C9.5	K09F5.2	K11H3.8	Y46D2A.3
K02F6.4	K07C11.10	K04A8.2	Y45F10D.7		K08D8.2	K09H9.8	M01B12.4	Y46E12BR.1
K03B8.1	K07F5.2	K04F10.4	Y46E12A.1		K08E3.1	K11D12.1	M01D7.1	Y48B6A.13
K03D3.13	K08B5.1	K04G7.4	Y47D7A.12		K08E4.3	M01E5.6	M01G12.11	Y48G10A.2
K03H1.11	K08C7.5	K04H4.6	Y48G8AL.10		K08E4.4	M01G12.11	M01G12.3	Y48G9A.3
K04G7.4	K08D12.6	K05C4.1	Y49C4A.9		K09F5.1	M01G12.9	M01G12.9	Y50D7A.5
K05F6.12	K08F4.8	K05C4.6	Y50D4C.5		K10C2.4	M02F4.9	M02F4.8	Y51H4A.13
K07C5.1	K08G2.6	K05D4.3	Y51A2A.3		K10C8.1	M02H5.10	M03D4.1	Y51H7BR.3
K07D4.6	K08H10.7	K06A4.1	Y51A2B.9		K10G4.6	M04C9.5	M117.1	Y53F4B.1
K08E3.2	K08H2.4	K06A4.4	Y51A2D.1		K10H10.6	M04D8.1	M195.1	Y53F4B.31
K08F11.1	K09C6.2	K06A4.7	Y51H4A.8		K11D12.1	M04G7.2	R01E6.2	Y53H1C.1
K08H10.9	K09E9.1	K06G5.1	Y51H7C.1		K11D12.2	M05D6.4	R02C2.4	Y53H1C.2
K10B2.1	K09F5.6	K07G5.3	Y54E10A.4		K12B6.6	M117.3	R02D5.7	Y54E10A.7
K10D2.6	K10B2.2	K07H8.9	Y54E10BR.1		K12D12.5	M28.5	R03A10.5	Y54E5A.1
K10D3.2	K10C2.1	K08B12.2	Y54G2A.15		K12H6.1	M7.5	R03G5.1	Y55D5A.1
K11G12.7	K10C2.3	K08B12.5	Y55F3AM.3		M01G12.11	M88.5	R05F9.3	Y57G11C.24
K11G9.3	K10G6.3	K08D8.5	Y57G11B.5		M01G5.5	R03G5.5	R06C7.6	Y62E10A.11
M01F1.7	K10H10.6	K08D8.6	Y57G11C.20		M02B7.3	R03H10.4	R07B5.8	Y62E10A.4
M01G12.2	K11D2.2	K08F11.4	Y57G11C.27		M04G12.3	R04B3.1	R07E5.4	Y67A10A.4
M03F8.4	K11G12.2	K08H10.1	Y67H2A.2		M05D6.4	R04D3.3	R07G3.8	Y68A4A.9
M04B2.1	K11G12.7	K08H2.1	Y68A4A.1		M110.3	R05D7.3	R09A8.1	Y69A2AR.11
M04G12.4	K11G9.6	K09C6.6	Y71D11A.3		M176.6	R05H11.2	R09B5.3	Y69A2AR.14
M05D6.3	K11H12.3	K09D9.12	Y71G12B.17		M28.5	R05H5.3	R09F10.6	Y71A12C.1
M151.2	K12D12.5	K09E10.1	Y71H10B.1		M79.1	R06B9.2	R102.2	Y71F9AL.11
M163.7	K12F2.2	K09F6.4	Y71H2AM.23		R03A10.5	R07A4.4	R102.7	Y71H10A.1
M199.3	K12G11.3	K09F6.5	Y73B6BL.14		R03D7.2	R07C3.15	R10D12.5	Y73B3A.16
M7.2	K12H4.7	K10C2.1	Y73B6BL.5		R03E9.3	R07E3.3	R11G11.11	Y73B3A.20
R01E6.2	M01A8.2	K10D3.2	Y73E7A.8		R03H4.3	R07E3.4	R12C12.9	Y73B6BR.1
R03G5.6	M01E5.1	K10F12.3	Y73F8A.14		R04E5.7	R07E5.4	R13A5.6	Y73C8B.2
R04B5.7	M01F1.3	K11D12.3	Y79H2A.1		R05A10.4	R07G3.8	R13H8.1	Y73E7A.6
R05A10.8	M01F1.8	K11E4.1	Y87G2A.3		R05G9.3	R08C7.10	R13H9.5	Y73E7A.7
R07C3.3	M03A8.1	K11G9.6	Y94H6A.1		R06B10.7	R09D1.10	R166.5	Y80D3A.3
R07E3.5	M04C7.1	K12B6.1	Y95B8A.5		R06C7.3	R09F10.6	T01B6.4	Y92H12BL.2
R07E5.14	M05D6.5	K12G11.3	Y97E10C.1		R06F6.6	R09F10.9	T01B7.7	ZC123.3
R07G3.1	M162.2	LLC1.2	Y9D1A.2		R07C12.2	R106.2	T02B11.7	ZC204.11
R07H5.8	M163.4	M01E10.3	ZC21.3		R07C3.15	R107.2	T02E1.7	ZC239.8
R08A2.5	M28.6	M01H9.2	ZC376.7		R07C3.8	R10E11.6	T03F7.7	ZK1055.7
R08F11.1	M60.4	M02H5.8	ZC404.8		R08H2.1	R11.2	T04F3.1	ZK1248.7
R08H2.2	R02E12.6	M03A1.6	ZC410.2		R08H2.9	R11A5.4	T04G9.1	ZK1307.3
R09B3.3	R02F2.1	M03A8.1	ZC412.9		R09A1.3	R11A5.7	T04G9.2	ZK180.5
R09B5.5	R02F2.4	M03C11.5	ZC64.2		R09A8.4	R11G1.3	T05A10.3	ZK402.3
R09D1.5	R03G5.1	M28.6	ZK1025.5		R09B5.1	R12E2.10	T05C7.1	ZK488.10
R10D12.9	R05F9.3	M60.2	ZK1236.3		R09B5.3	R12H7.2	T05E12.6	ZK512.6
R10E11.1	R06A10.1	M7.3	ZK1236.5		R10E11.8	R13A1.3	T05G5.6	ZK596.3
R10E4.9	R06C1.4	PAR2.4	ZK1248.16		R12C12.1	R144.10	T06A1.5	ZK662.5
R11G1.3	R07E3.5	R01H10.1	ZK177.4		R12E2.15	R144.9	T06C12.6	ZK892.4
R11G11.10	R07E4.6	R01H2.5	ZK328.8		R12H7.1	R52.1	T06D4.2
R13D11.4	R07G3.1	R02D5.1	ZK550.4		R13A1.7	T01G6.5	T07A9.2
R13H7.2	R08C7.8	R03D7.6	ZK593.8		R13A5.10	T01G6.6	T07C12.7
R151.7	R08E3.1	R04D3.2	ZK6.7		R13D7.10	T01H10.6	T07D4.4
R153.1	R08E3.3	R04D3.8	ZK616.5		R160.3	T02G5.1	T07H6.2
R160.5	R10E11.2	R05D3.2	ZK652.6		R31.1	T02G5.6	T08A9.12
R160.7	R10E4.1	R05D8.6	ZK783.4		R53.2	T03E6.6	T08D2.3
R74.5	R10F2.1	R07B1.1	ZK892.1		R53.4	T04A8.3	T08E11.6
T01C4.6	R11.4	R07B1.10	ZK970.7		T01B11.1	T04B2.1	T09A5.2
T01G5.3	R12B2.5	R07C3.6	ZK973.6		T01B7.7	T04B2.4	T09F5.9
T01G5.6	R13H4.5	R08E5.4			T01D1.2	T04C12.5	T10B5.7
T01G6.8	T01B11.4	R08H2.12			T01D1.6	T04F3.3	T10D4.4
T01G6.9	T01B6.1	R08H2.2			T01E8.7	T04F8.8	T12A2.12
T01G9.1	T01E8.4	R09A1.1			T01G6.3	T04H1.9	T12C9.6
T01G9.6	T01G1.2	R09B3.1			T01H3.4	T05A12.1	T13A10.11
T01H3.2	T01G9.6	R09B5.11			T03F1.10	T05F1.1	T13A10.12
T02B5.1	T02G5.2	R09B5.6			T03F6.2	T05G5.6	T13F2.12
T02G5.9	T02G5.7	R09H3.3			T03G11.2	T05H10.5	T13F3.3
T02H6.1	T04A8.4	R107.7			T04A6.1	T06E4.7	T13H5.4
T02H6.10	T04D3.4	R11G1.3			T04C10.4	T06E6.1	T14B1.1
T03E6.8	T05A8.4	R12C12.3			T04F3.1	T07C4.9	T14B4.3
T03F6.4	T05B4.9	R12E2.2			T04H1.1	T07D3.3	T14B4.8
T04A8.14	T05C3.2	R12E2.6			T05A10.3	T07D4.4	T15B7.1
T05A8.1	T05E11.6	R160.4			T05B11.6	T07F8.3	T15B7.3
T05A8.4	T05F1.6	R53.1			T05C1.3	T08A9.11	T15D6.6
T05B11.1	T06D8.3	R53.7			T05G5.1	T08B6.1	T17H7.4
T05C12.5	T06E4.10	R74.2			T05H10.6	T08D2.5	T19A6.2
T05G5.12	T07H6.3	R74.5			T05H4.13	T08G2.3	T19B10.4
T05H4.7	T08A9.9	T01B4.1			T06C12.12	T08G3.6	T19C9.3
T06A4.3	T08B2.7	T01C4.2			T07C4.9	T09B4.6	T19D12.5
T06D8.3	T08G11.3	T01D3.6			T07D3.2	T09B4.7	T19D7.1
T06E6.8	T08G5.10	T01D3.7			T08A9.7	T09E11.10	T19H12.3
T07C12.3	T09E11.4	T02E1.3			T08G2.3	T09E8.4	T20B6.1
T07F8.3	T09F3.1	T03G11.2			T08G3.2	T10B11.7	T21F4.1
T07G12.11	T09F5.9	T04A8.14			T08G5.10	T10B9.2	T21H3.4
T07G12.3	T10H4.9	T04A8.3			T09E11.5	T10B9.5	T22C1.4
T08B1.5	T12B5.13	T04A8.9			T10C6.11	T10D4.3	T22C1.8
T09A12.5	T12F5.3	T05A7.6			T10D4.3	T10E9.9	T22C8.3
T09E11.1	T12G3.1	T05E11.2			T10D4.7	T11F1.1	T22C8.7
T09E11.10	T13A10.1	T05G5.8			T10D4.8	T11F8.3	T22H6.7
T09F3.1	T13F2.11	T06D8.1			T10F2.1	T12A7.4	T23F1.1
T10C6.13	T13H5.3	T06E6.15			T11A5.3	T12C9.6	T23G7.2
T10C6.6	T14B4.7	T07A9.10			T11B7.2	T16G1.2	T24B8.7
T10H10.2	T14G10.8	T07C12.3			T11F8.4	T17A3.6	T24D8.3
T11F8.2	T14G12.4	T07C4.9			T12A2.10	T17H7.4	T24H10.7
T12G3.7	T15B12.1	T07C5.1			T12A2.6	T19B10.4	T25D1.1
T13B5.9	T15B7.7	T07G12.3			T13F2.11	T19B4.3	T25G12.5
T13C2.2	T15B7.8	T08B1.6			T13F2.2	T20F10.2	T27A1.5
T13C2.3	T15D6.11	T08D10.3			T13G4.4	T22B11.1	T27A3.1
T13F3.6	T15D6.3	T08G11.3			T13H5.4	T22B7.5	T27A8.4
T13H5.6	T16A9.5	T08G5.10			T13H5.8	T22D1.11	T28A11.19
T14B1.1	T18H9.2	T09B4.7			T14F9.4	T22H6.7	T28C6.6
T16A1.7	T18H9.4	T09B9.3			T15D6.4	T22H9.4	T28F12.2
T16G12.4	T20B5.2	T09E11.8			T15H9.1	T23B12.7	T28H11.5
T16G12.5	T20F5.4	T09F5.1			T15H9.3	T24B8.5	T28H11.6
T17A3.2	T20G5.5	T10B10.7			T16G1.7	T24C4.4	VF13D12L.3
T18D3.7	T21B4.7	T10B9.1			T18H9.2	T24D1.1	W01A11.5
T18H9.7	T21C9.3	T10C6.9			T19A6.1	T25B6.3	W01B11.5
T19C4.7	T21C9.9	T10G3.2			T19A6.2	T25D10.4	W01B6.4
T19H12.10	T21H3.1	T10H10.2			T20D4.7	T25E12.7	W02B3.6
T20F10.2	T22C8.5	T10H4.12			T20G5.1	T25G12.5	W02D7.4
T20F10.5	T22E5.5	T10H4.6			T20G5.9	T25G3.3	W03A3.1
T20G5.6	T23B3.4	T10H4.8			T21C12.1	T26C5.1	W03D2.1
T21D12.9	T23B3.5	T11F9.11			T21C9.9	T26E3.6	W03F8.9
T21E8.7	T23D5.7	T12A2.2			T21G5.2	T27B7.1	W03G1.7
T22D1.1	T23D8.9	T12B3.1			T21H3.1	T28B8.3	W03G11.1
T22H6.3	T23G5.6	T12F5.5			T22A3.6	T28C6.6	W04B5.5
T23D5.11	T23H4.2	T12G3.1			T22B3.1	T28D9.7	W04D2.1
T23H2.5	T24A11.2	T13C2.3			T22C1.4	T28F2.1	W04E12.6
T24D1.3	T25B6.2	T14G11.1			T23D5.10	VF13D12L.3	W05B2.1
T24F1.5	T25B9.5	T16D1.2			T23D8.5	W02A2.7	W05B2.6
T24H7.5	T25C12.2	T19A5.1			T23F1.1	W02D3.9	W05E7.1
T25F10.3	T25C12.3	T19A5.5			T23F1.3	W02F12.3	W05G11.5
T26E3.7	T25C8.2	T19C3.1			T24E12.11	W02H5.1	W05H12.2
T26H2.10	T25G12.11	T19C3.4			T25C8.2	W03A5.1	W06D4.1
T27A8.2	T26E4.2	T19D12.4			T26A5.1	W03C9.6	W06D4.4
T27A8.5	T26E4.4	T19F4.1			T26C11.2	W03D2.1	W06E11.5
T27C10.2	T27A1.6	T20D3.2			T26E3.4	W03F11.1	W07A12.5
T27E9.3	T27C10.1	T20G5.8			T27B7.3	W03F8.9	W07E6.3
T28A11.16	T27F7.3	T20H9.5			T28C12.5	W03G11.3	W07G1.3
T28A11.6	T28A8.7	T21E12.2			T28F4.5	W04G5.4	W08D2.3
T28A8.8	T28D6.9	T21H3.1			W02A2.2	W05B2.1	W08E12.8
T28C12.4	T28F3.8	T22C8.5			W02A2.5	W05F2.3	W09B12.1
W01D2.4	T28F4.5	T22G5.1			W02D9.7	W05H5.6	W09C3.1
W02B12.4	T28H10.3	T22H6.6			W03C9.2	W06G6.7	W09C3.7
W03A5.5	T28H11.1	T23B3.5			W03G1.5	W09G10.3	W09C3.8
W05E10.4	VC5.3	T23F11.3			W04D2.3	W10G11.12	W09G10.1
W06D4.5	VW02B12L.1	T23G7.4			W04G5.9	Y105E8B.6	W09G12.3
W08A12.2	W01A11.4	T24A6.13			W05B2.1	Y106G6D.2	W09G12.7
W09D10.3	W01A11.5	T24B1.1			W05B2.6	Y106G6H.7	W10G11.11
W10C8.2	W01A11.7	T24B8.3			W05H5.2	Y110A2AL.13	W10G11.13
Y102A5C.18	W02B12.7	T24B8.5			W05H5.5	Y110A2AL.5	Y102A5C.17
Y105C5A.13	W02B3.6	T24C12.3			W05H7.4	Y111B2A.19	Y105C5A.25
Y105C5A.22	W03A5.2	T24C4.4			W06D12.5	Y116A8A.3	Y105C5B.11
Y105C5B.25	W03A5.3	T24D5.4			W06F12.1	Y116A8C.9	Y105C5B.6
Y108F1.4	W03D8.6	T24D8.1			W06G6.13	Y116F11B.1	Y10G11A.2
Y111B2A.10	W03F11.3	T24D8.5			W09C2.1	Y116F11B.13	Y116A8C.36
Y116A8A.4	W03G1.5	T24H10.3			W09G10.6	Y116F11B.7	Y116F11B.8
Y116A8C.40	W03G1.7	T24H7.5			W09G12.8	Y11D7A.11	Y11D7A.11
Y116A8C.5	W04B5.3	T25B6.7			Y104H12D.3	Y17G9B.9	Y17D7A.3
Y116F11B.13	W04H10.2	T25C12.3			Y105C5B.1	Y18D10A.23	Y17G7B.22
Y11D7A.1	W05E10.4	T25D3.4			Y105C5B.11	Y19D10A.9	Y1B5A.1
Y12A6A.1	W05G11.6	T26C11.4			Y105C5B.7	Y22D7AL.8	Y23H5A.8
Y18D10A.2	W06B11.4	T26C5.3			Y105E8A.14	Y25C1A.12	Y32B12C.2
Y23H5A.5	W06F12.2	T26E4.10			Y105E8B.2	Y26D4A.5	Y37A1B.11
Y32G9A.3	W06F12.3	T27A1.1			Y108F1.3	Y26D4A.6	Y37A1B.17
Y37A1B.2	W07B3.2	T27A1.6			Y108G3AL.7	Y32G9A.1	Y37E11AL.9
Y37A1C.1	W07B8.5	T27B7.1			Y111B2A.24	Y37D8A.23	Y37E11C.1
Y37E3.9	W07G4.5	T27E9.9			Y113G7A.14	Y37E11AM.2	Y38E10A.23
Y37H2A.8	W08D2.4	T28B4.4			Y113G7B.1	Y38E10A.19	Y38F1A.6
Y38C1AA.9	W09G12.8	T28C12.4			Y113G7B.12	Y38F1A.6	Y38F1A.9
Y38C1BA.3	Y105C5B.12	T28F2.5			Y116A8C.12	Y38F2AR.1	Y38F2AR.6
Y38E10A.17	Y105C5B.3	T28H10.3			Y116A8C.16	Y38H6A.3	Y39G10AR.6
Y38F2AL.1	Y105E8A.2	W01F3.1			Y116F11A.1	Y39A3CL.7	Y40B10B.2
Y38F2AL.3	Y105E8A.3	W02D7.8			Y119D3B.18	Y39G10AR.13	Y41C4A.14
Y38F2AR.7	Y111B2A.12	W03D2.7			Y119D3B.6	Y39G8B.7	Y42A5A.4
Y38H6C.5	Y111B2A.22	W03D8.6			Y17D7B.3	Y41E3.12	Y43C5A.1
Y38H6C.9	Y113G7A.9	W03F8.9			Y19D2B.1	Y43F8B.14	Y44A6C.1
Y39A3B.1	Y113G7C.1	W03G11.3			Y22D7AL.11	Y43F8C.15	Y45F10A.3
Y39A3B.4	Y116A8C.10	W03G9.1			Y22D7AL.16	Y45F10B.5	Y45G12C.3
Y39G10AR.17	Y116A8C.463	W03H9.3			Y22D7AR.6	Y45F10D.2	Y45G5AM.1
Y41D4B.19	Y116F11A.1	W04B5.3			Y23H5A.1	Y46G5A.13	Y46E12BL.4
Y43B11AR.2	Y116F11B.3	W05F2.4			Y25C1A.2	Y47D3A.1	Y46H3D.2
Y43C5B.3	Y116F11B.6	W06F12.1			Y34B4A.4	Y47D3A.10	Y46H3D.4
Y44A6B.3	Y119D3B.12	W06H3.1			Y35H6.1	Y47D3B.11	Y47D3A.10
Y44E3A.4	Y16B4A.2	W06H8.1			Y37A1B.11	Y48E1B.14	Y47H9C.4
Y45F10D.2	Y22F5A.4	W07B3.2			Y37D8A.15	Y48E1B.3	Y48B6A.8
Y46H3A.5	Y34B4A.9	W07G4.4			Y37E3.15	Y48E1B.7	Y48C3A.10
Y47D7A.11	Y34F4.5	W08A12.2			Y38A10A.4	Y48G1BL.3	Y48G1A.4
Y48E1B.12	Y37A1B.2	W09D12.1			Y38C1AA.7	Y49C4A.3	Y48G9A.3
Y48E1C.1	Y37E3.15	Y102A5C.8			Y38C9B.3	Y49E10.24	Y49F6B.10
Y48G8AL.10	Y37E3.3	Y105E8A.4			Y38F1A.6	Y51A2D.7	Y49F6C.3
Y49A10A.1	Y37H2A.4	Y106G6A.2			Y38H8A.2	Y51H7C.7	Y50D7A.8
Y4C6A.4	Y38A10A.5	Y110A7A.17			Y39B6A.1	Y53F4B.6	Y51A2D.1
Y50D7A.9	Y38C1AA.11	Y113G7B.11			Y39B6A.20	Y53G8AM.4	Y51A2D.18
Y50F7A.2	Y38F2AL.4	Y15E3A.1			Y39C12A.6	Y53H1B.1	Y51H7C.10
Y51A2D.19	Y39A1A.18	Y17D7B.8			Y39E4A.1	Y54G11A.12	Y52B11A.5
Y51B9A.9	Y39A1C.3	Y17G7B.8			Y39G10AR.18	Y54G9A.6	Y52E8A.3
Y51F10.10	Y39A3B.3	Y18D10A.12			Y39G8B.3	Y55B1AR.2	Y53F4B.26
Y51H4A.10	Y39B6A.1	Y18H1A.11			Y39H10A.3	Y55F3AR.2	Y53H1B.6
Y51H4A.15	Y39B6A.19	Y18H1A.9			Y40D12A.1	Y56A3A.7	Y53H1C.2
Y51H7C.2	Y39B6A.20	Y19D10A.9			Y42A5A.4	Y57A10A.11	Y54F10AM.8
Y53C12A.2	Y39B6A.24	Y1H11.2			Y43B11AL.1	Y57A10A.31	Y54F10BM.3
Y53F4B.30	Y39G8B.3	Y20F4.4			Y43F8B.3	Y57G11C.33	Y57A10A.11
Y53F4B.42	Y40D12A.2	Y22F5A.4			Y45F10A.3	Y58A7A.5	Y57A10B.2
Y53F4B.7	Y43C5A.1	Y22F5A.5			Y45G12B.2	Y5H2B.3	Y57G11C.2
Y53H1B.1	Y43C5A.2	Y26D4A.21			Y45G12C.14	Y60A3A.6	Y59C2A.1
Y56A3A.32	Y43D4A.4	Y26G10.2			Y45G5AM.1	Y62E10A.14	Y5H2A.2
Y59A8B.10	Y43F8B.2	Y34B4A.10			Y46G5A.42	Y62H9A.13	Y61B8B.2
Y61A9LA.4	Y43F8B.3	Y34B4A.6			Y46G5A.43	Y62H9A.2	Y62E10A.5
Y61B8B.1	Y43H11AL.1	Y34B4A.9			Y46H3A.2	Y62H9A.3	Y62H9A.10
Y65B4BR.1	Y44A6D.6	Y37E3.15			Y46H3A.6	Y62H9A.4	Y67D8C.8
Y67D2.4	Y45F10A.3	Y37H2A.13			Y47D3B.2	Y62H9A.5	Y68A4B.2
Y67D8B.4	Y45F3A.9	Y37H2A.14			Y48C3A.1	Y62H9A.6	Y69A2AR.24
Y69A2AR.23	Y45G12B.2	Y38A10A.5			Y48E1B.2	Y64H9A.2	Y69H2.12
Y69H2.12	Y45G12C.1	Y38F2AL.6			Y48E1B.7	Y65B4A.7	Y69H2.14
Y6B3B.3	Y45G5AM.5	Y38F2AR.2			Y48E1C.1	Y66D12A.15	Y71G12B.4
Y6E2A.8	Y46C8AR.1	Y39A1A.15			Y48G1A.4	Y67H2A.2	Y71H2AM.20
Y71A12B.10	Y46G5A.10	Y39A1C.4			Y49A3A.5	Y69A2AR.27	Y73B3B.1
Y71D11A.1	Y46G5A.4	Y39B6A.20			Y50D4B.5	Y69H2.11	Y73B6BL.14
Y71H2B.11	Y46H3A.3	Y39B6A.24			Y50E8A.14	Y70C5C.3	Y73B6BL.29
Y73B6A.4	Y46H3A.6	Y39B6A.30			Y51A2A.3	Y71F9AR.4	Y73B6BL.34
Y73C8C.4	Y48B6A.1	Y39B6A.5			Y51A2A.9	Y71G12B.3	Y73F8A.2
Y75B12B.1	Y48C3A.11	Y39E4B.12			Y53F4B.37	Y73B6BL.3	Y74E4A.1
Y75B8A.19	Y48E1B.5	Y39G10AR.16			Y53G8AM.4	Y75B12B.2	Y75B12B.4
Y76B12C.8	Y49E10.16	Y39G10AR.8			Y54F10BM.11	Y75B8A.17	Y77E11A.15
Y82E9BL.5	Y49F6B.5	Y40C7B.4			Y54F10BM.3	Y75B8A.2	Y82E9BL.16
Y87G2A.11	Y51A2A.3	Y43D4A.6			Y56A3A.33	Y75B8A.31	Y82E9BL.6
Y92H12A.1	Y51A2D.19	Y43F8C.11			Y57A10A.11	Y75B8A.32	Y8A9A.4
Y97E10B.7	Y51F10.10	Y44E3A.1			Y57A10B.4	Y77E11A.15	Y9C2UA.1
ZC374.2	Y51H7BR.5	Y45G12C.15			Y57A10C.5	Y79H2A.4	ZC168.6
ZC404.9	Y51H7BR.7	Y46C8AL.2			Y59A8B.3	Y82E9BL.11	ZC190.8
ZC416.2	Y53G8AM.5	Y46C8AL.8			Y60A3A.4	Y82E9BR.10	ZC196.5
ZC434.8	Y53H1B.2	Y46D2A.2			Y62E10A.15	Y8A9A.4	ZC477.2
ZC455.11	Y54E10A.2	Y46H3A.3			Y62H9A.3	Y97E10AR.3	ZC487.3
ZC487.5	Y54E10A.4	Y46H3B.1			Y6G8.1	Y9C2UA.2	ZC518.3
ZC64.4	Y54E10BL.2	Y47H10A.5			Y71F9B.4	Y9C9A.14	ZK1058.4
ZK1005.1	Y54F10AM.6	Y47H9C.9			Y71H2AM.19	Y9D1A.2	ZK1067.8
ZK1025.5	Y54F10BM.3	Y48E1B.10			Y73B3A.14	ZC132.4	ZK112.5
ZK1037.8	Y54G11A.13	Y48E1C.4			Y73B3A.5	ZC239.5	ZK1193.1
ZK1086.3	Y54G2A.22	Y48G8AR.1			Y73B6BL.34	ZC404.3	ZK121.1
ZK112.2	Y54G9A.4	Y48G9A.3			Y73B6BL.7	ZC404.8	ZK1248.2
ZK1127.2	Y57G11A.2	Y48G9A.6			Y73F8A.10	ZC47.10	ZK1248.7
ZK1127.4	Y5F2A.4	Y49A3A.2			Y74C10AL.2	ZK1010.6	ZK1251.6
ZK121.2	Y61B8B.2	Y50E8A.16			Y74C9A.2	ZK1037.5	ZK1290.7
ZK1240.6	Y65B4BR.6	Y50E8A.2			Y75B8A.29	ZK1053.1	ZK1307.3
ZK218.5	Y67D8C.1	Y51F10.10			Y82E9BL.11	ZK1055.5	ZK180.5
ZK265.7	Y67H2A.4	Y51F10.7			Y82E9BL.8	ZK1128.2	ZK185.1
ZK354.8	Y6B3B.11	Y51H7C.6			Y8A9A.3	ZK1193.1	ZK354.11
ZK381.3	Y6D1A.2	Y53C10A.15			Y92H12BR.7	ZK1290.1	ZK354.5
ZK381.5	Y6E2A.9	Y53G8AL.3			Y94A7B.1	ZK1290.7	ZK484.2
ZK616.8	Y71F9B.1	Y53G8AM.7			Y94H6A.8	ZK1307.3	ZK488.10
ZK632.11	Y71H2AM.12	Y54E10A.11			Y97E10AR.3	ZK185.1	ZK512.9
ZK637.3	Y73B3A.5	Y54E2A.12			Y97E10B.1	ZK250.6	ZK563.1
ZK673.4	Y73F8A.1	Y54E2A.7			ZC196.7	ZK353.1	ZK563.2
ZK697.1	Y75B12B.7	Y54F10AL.1			ZC204.12	ZK353.8	ZK6.3
	Y75B7AR.1	Y54F10BM.13			ZC262.4	ZK354.9	ZK622.4
	Y75D11A.2	Y54G11A.12			ZC373.6	ZK418.3	ZK637.4
	Y76B12C.3	Y54G11A.5			ZC434.5	ZK418.8	ZK688.3
	Y7A5A.3	Y54G11A.6			ZC8.3	ZK455.7	ZK697.5
	Y82E9BR.9	Y54G9A.4			ZK1025.9	ZK488.10	ZK721.2
	Y8G1A.1	Y55B1AR.1			ZK1037.7	ZK6.3	ZK822.1
	Y92H12BL.2	Y55F3AM.14			ZK1058.2	ZK622.4	ZK892.6
	Y94A7B.1	Y55F3C.2			ZK1128.2	ZK666.10	ZK930.5
	Y94H6A.3	Y57A10B.1			ZK1128.4	ZK686.6	ZK993.1
	Y9C9A.18	Y58A7A.5			ZK1251.6	ZK721.2
	ZC247.2	Y59C2A.2			ZK1290.1	ZK757.4
	ZC376.7	Y5H2B.2			ZK1320.2	ZK783.1
	ZC376.8	Y60A3A.4			ZK256.1	ZK822.2
	ZC395.4	Y62F5A.1			ZK262.11	ZK897.1
	ZC395.5	Y65B4BL.6			ZK354.11	ZK909.2
	ZC395.7	Y65B4BR.6			ZK354.5	ZK973.11
	ZC404.11	Y67D8C.9			ZK384.2	ZK973.2
	ZC412.6	Y71D11A.5			ZK430.7
	ZC434.5	Y71F9AR.1			ZK470.5
	ZC449.5	Y71F9B.8			ZK524.3
	ZC513.10	Y73B3A.5			ZK622.4
	ZC513.8	Y73B6BL.31			ZK632.8
	ZC518.3	Y73F8A.32			ZK721.2
	ZK1025.9	Y76A2B.6			ZK783.3
	ZK1037.7	Y77E11A.11			ZK792.4
	ZK112.1	Y77E11A.4			ZK813.1
	ZK1251.6	Y7A5A.6			ZK813.3
	ZK1320.3	Y87G2A.13			ZK822.2
	ZK154.1	Y92H12BL.5			ZK822.5
	ZK177.8	Y95B8A.1			ZK863.2
	ZK218.7	Y97E10AR.2			ZK899.6
	ZK228.7	ZC13.4			ZK909.2
	ZK287.6	ZC204.6
	ZK354.11	ZC373.6
	ZK455.1	ZC404.9
	ZK507.1	ZC449.5
	ZK593.2	ZC455.9
	ZK616.8	ZC487.5
	ZK632.10	ZC8.4
	ZK632.8	ZK1320.3
	ZK643.6	ZK256.1
	ZK666.2	ZK265.7
	ZK742.3	ZK287.4
	ZK795.1	ZK353.3
	ZK909.3	ZK418.7
		ZK484.3
		ZK488.7
		ZK524.1
		ZK6.10
		ZK6.7
		ZK632.5
		ZK673.1
		ZK892.2
		ZK892.3
		ZK896.4
		ZK945.1
		ZK945.2
		ZK970.6

## Sheet: TableS9D
cDNA-arrays
Up-regulated genes WS210			Down-regulated genes WS210
S. marcescens 24h	D. coniospora 12h		S. marcescens 24h	D. coniospora 12h
B0222.8	B0001.3		B0025.1	B0001.8
B0244.8	B0035.12		B0350.2	B0205.10
B0491.2	B0035.3		B0454.9	B0350.2
C01B10.6	B0035.6		B0491.2	B0454.9
C01B12.1	B0213.4		B0491.3	C01F6.5
C01G8.1	B0213.5		C01F6.5	C01G6.1
C02A12.4	B0213.6		C01G6.1	C03G6.19
C02F12.8	B0238.10		C01G6.8	C04F6.3
C06A8.3	B0261.1		C04F6.3	C04G2.4
C07H6.5	B0336.13		C04G2.4	C05G5.4
C14F11.1	B0336.3		C04G2.8	C06E7.4
C15A11.1	B0361.2		C05E4.9	C07B5.5
C15A11.6	B0361.7		C06G1.4	C10G11.8
C16H3.2	B0511.7		C07B5.5	C10G11.9
C17G10.5	B0554.1		C07G2.2	C15A11.1
C17H12.14	C01G10.7		C08B6.7	C15H9.6
C18A11.7	C01G8.1		C09B9.6	C16A3.3
C18E3.7	C02A12.4		C10G11.9	C16B8.4
C18G1.4	C02B10.2		C16A3.6	C16E9.2
C23H5.8	C04A2.7		C16B8.4	C17B7.2
C29E4.1	C05D11.2		C16E9.2	C27A12.2
C29F4.1	C05D2.5		C17G1.6	C27D8.3
C31H2.2	C06A5.6		C24D10.7	C28A5.4
C36B1.4	C06A8.3		C25B8.4	C28C12.5
C44E4.4	C06H2.3		C25F6.2	C29F9.7
C44E4.6	C07E3.1		C28C12.5	C32F10.4
C47B2.6	C07G1.3		C32D5.8	C34E7.4
C47E8.5	C08B6.10		C32F10.4	C34F11.6
C49F5.1	C08C3.4		C33F10.9	C34F11.9
C50D2.4	C09F9.7		C34D4.14	C34G6.2
C55B7.4	C10C5.6		C34F11.4	C35C5.3
D2023.7	C12D8.11		C34F11.6	C35D10.11
D2024.8	C13G3.3		C35D10.11	C35D10.14
F08G5.4	C13G5.2		C36E8.3	C35E7.9
F09F7.4	C14B1.2		C41H7.6	C36E8.3
F10C1.2	C14C6.5		C44B7.10	C37E2.5
F11E6.3	C16A3.7		C45G7.3	C44C8.6
F13D12.6	C16H3.2		C49A1.4	C45G7.3
F13H10.4	C17C3.1		C50F4.6	C46E10.4
F14D7.2	C17E7.4		C51E3.7	C50F4.6
F14F7.1	C17F4.5		C52D10.9	C52D10.6
F17C8.2	C17G10.9		C52E4.1	D1005.2
F18E2.2	C17H12.14		C54G10.2	D2021.1
F19C7.1	C24F3.4		E01G4.5	D2085.1
F22F7.1	C25A1.9		E03H12.10	D2096.6
F23H12.4	C25A11.2		E03H12.5	DC2.7
F25H5.3	C27B7.5		EEED8.15	E01G4.5
F25H5.7	C27C7.1		F08B12.4	EEED8.2
F25H8.5	C27D6.4		F09F7.7	EEED8.4
F26B1.3	C27F2.9		F11G11.8	F01D5.6
F26D10.3	C28H8.9		F12F6.1	F02E9.4
F27C1.8	C30B5.1		F13B10.1	F08C6.4
F28A12.4	C30C11.4		F13C5.2	F08G5.4
F28H1.3	C32E8.10		F13D12.7	F09A5.4
F29B9.4	C32E8.8		F14H12.4	F10G7.10
F29B9.9	C33C12.9		F15E6.3	F11H8.3
F29G9.5	C33H5.14		F18C5.10	F13B10.1
F35B12.7	C34B2.10		F18H3.3	F13C5.2
F35C8.7	C34F11.8		F21C10.10	F14B6.3
F36A4.6	C35D10.6		F21C10.7	F14B8.5
F37C4.5	C36B1.7		F22F1.1	F14H12.4
F38A3.2	C37C3.1		F23C8.9	F15A8.6
F40F4.6	C37C3.9		F23F12.9	F15B10.3
F41E6.2	C38D4.6		F26D2.2	F17E9.10
F43G9.9	C45E5.6		F26F12.3	F18H3.3
F46C8.2	C45G9.6		F26G1.7	F21C10.10
F46E10.10	C48B4.7		F26G5.9	F21E9.4
F46F2.3	C48E7.10		F28D1.2	F22D6.6
F53F1.4	C50E3.11		F28F8.2	F22F1.1
F53G12.5	C54G6.1		F28H1.1	F23B12.8
F53G12.7	C55A6.2		F31F6.5	F23F12.9
F54C9.8	D1007.8		F32B6.6	F25B5.2
F54D1.2	D2013.9		F36A2.10	F25B5.7
F54D11.1	D2023.5		F36H12.7	F26G5.9
F55H2.2	D2024.5		F36H5.11	F28D1.2
F56H1.4	E01A2.1		F40F4.3	F28F8.2
F57F4.3	E01B7.1		F40H3.6	F28H1.1
F57F4.4	F01G12.2		F43C11.7	F28H6.6
F57F5.1	F01G4.4		F43E2.8	F32D8.7
F58F6.1	F02E8.5		F45E1.6	F33C8.1
F58G1.4	F08F3.6		F46A9.6	F33E2.5
H19N07.1	F08G2.7		F49E11.10	F35B12.7
H39E23.1	F09B12.3		F52H3.7	F40F4.3
K02F2.2	F09E10.3		F53A9.8	F43C11.7
K06G5.1	F09F7.4		F53B2.6	F43G6.5
K07A1.2	F11G11.2		F53B3.5	F44F1.6
K09F5.2	F13D12.6		F53F4.11	F44G4.8
K10D3.3	F14D2.12		F54D8.2	F45C12.7
K12H4.7	F14H3.6		F57C7.3	F46A9.6
LLC1.2	F18A1.7		F58B3.9	F47A4.2
M03F4.7	F21G4.2		K02F3.4	F49E11.10
M7.2	F23B2.7		K04H4.2	F49E7.2
R04D3.3	F25B4.4		K05F1.2	F52C12.5
R05D8.8	F25D7.1		K05F1.7	F53A9.8
R07B1.10	F26D10.3		K06C4.5	F53B2.6
R09B3.1	F26H11.4		K07F5.1	F53C11.8
R11H6.1	F32A6.3		K07F5.11	F53F4.14
T01G1.1	F32B6.2		K07F5.2	F53G2.7
T02E1.3	F32D8.5		K07F5.3	F54D8.1
T03E6.7	F33E11.6		K07F5.9	F54E4.1
T03F1.3	F36A2.9		K08F4.8	F55A11.2
T05F1.2	F37B4.7		K08H10.1	F55A12.9
T05G5.10	F37C12.13		K11D2.2	F55A8.1
T05G5.6	F39B2.11		K11G9.6	F56A11.3
T06E6.2	F41H10.3		K12H6.6	F58B3.9
T10B10.1	F42A8.3		M01E5.4	F58D5.1
T11B7.3	F43G9.9		M01H9.3	F59A6.5
T11F8.3	F44F4.2		M04G12.2	H06O01.3
T12E12.3	F45E4.2		M163.3	H20J04.5
T14B4.7	F46F11.2		R01B10.1	H42K12.3
T18H9.2	F46F2.3		R01E6.3	K04H4.2
T21C9.12	F52B5.2		R03E9.1	K06A1.3
T21D9.1	F52D10.2		R03G5.2	K07B1.8
T25C8.2	F53A2.4		R05F9.13	K07E3.4
VC5.3	F53F8.3		R07B7.3	K07F5.11
W01B6.7	F54C9.8		R10E4.2	K07F5.3
W02A2.1	F54D5.9		R10E9.2	K08B4.6
W02A2.7	F55A11.7		R13.4	K08D12.6
W02F12.3	F55C5.5		R13H9.4	K08F8.4
W03C9.7	F56C9.3		T01C8.1	K08H10.7
W04B5.3	F57A10.4		T02B11.3	K09G1.1
W04E12.8	F57B9.10		T03D8.3	K09H11.3
W05E7.1	F57F4.3		T05A7.4	K10C9.3
W06D12.3	F58A4.2		T05A8.3	K11C4.4
W08D2.7	F59B2.2		T07C4.4	K11G9.6
W08F4.3	F59H5.1		T09B4.5	K12G11.3
Y106G6H.2	H02I12.1		T10G3.6	M01A10.2
Y119D3B.21	H03A11.1		T13F2.10	M117.1
Y18D10A.11	H26D21.2		T13F2.8	M163.3
Y22D7AL.10	K01C8.3		T14F9.3	R06A4.2
Y22F5A.4	K01C8.5		T22F3.11	R06A4.8
Y32F6A.5	K02B2.3		T23F2.1	R10E4.1
Y37E3.9	K02D10.1		T23G7.3	R10E4.2
Y38C1BA.3	K03H1.7		T27A3.3	R11.4
Y38F1A.6	K04F10.3		T28B8.1	R12H7.3
Y38H6C.1	K04G2.6		T28F4.1	R13G10.1
Y38H8A.4	K07A1.6		T28H11.1	R160.7
Y39B6A.1	K07A12.6		T28H11.5	R31.2
Y39B6A.16	K07H8.2		W08D2.4	T01C8.1
Y39G8C.2	K08H10.9		W09C3.6	T01D1.6
Y41D4A.2	K10H10.2		W09C5.1	T01G9.2
Y43E12A.1	M01E11.5		Y116A8C.35	T01H3.2
Y43F8C.12	M03A1.6		Y17G7B.20	T04D1.4
Y46E12A.1	M03C11.5		Y38C1AA.7	T05A7.4
Y47G6A.22	M142.5		Y39E4B.3	T06D10.1
Y49E10.3	R02F2.4		Y40B10A.9	T07G12.5
Y49F6B.10	R04D3.3		Y43F8B.2	T09B4.10
Y51F10.7	R05G6.4		Y47D7A.1	T09B4.8
Y54E2A.1	R05H5.4		Y47D7A.8	T09F5.9
Y54G2A.23	R06C7.4		Y48G8AL.13	T10G3.6
Y54G2A.6	R06F6.4		Y54E10BR.4	T12D8.1
Y55B1AR.1	R09B5.3		Y54G2A.11	T12G3.1
Y63D3A.5	R09B5.8		Y57A10A.23	T13F2.11
Y64G10A.7	R09B5.9		Y57A10A.26	T13F2.8
Y65B4BL.2	R09F10.8		Y63D3A.8	T14F9.3
Y65B4BL.4	R107.4		Y73B6BL.9	T14G10.6
Y65B4BL.5	R10E11.4		Y9D1A.1	T19D12.6
Y69H2.3	R186.3		ZK1127.4	T24H7.2
Y73B6BL.34	T01C3.9		ZK1248.6	T25E12.6
ZC373.7	T02G6.5		ZK1251.6	T25F10.6
ZC513.6	T04A8.10		ZK131.2	T26C11.5
ZC513.8	T04A8.8		ZK131.6	T26C12.3
ZK1127.10	T05F1.2		ZK354.1	T27A3.3
ZK1128.6	T09B4.1		ZK484.5	T27C4.4
ZK1248.2	T10F2.3		ZK484.8	T28B8.1
ZK265.2	T12C9.7		ZK593.6	T28H11.1
ZK6.7	T12G3.6		ZK622.3	VW06B3R.1
	T13F2.6		ZK673.2	W01G7.5
	T19B10.2			W03F11.6
	T19C4.7			W04A8.4
	T20H4.3			W04G3.8
	T21C9.13			W05G11.6
	T21G5.3			W05H7.4
	T22D1.5			W09G12.1
	T22F3.2			Y102A11A.8
	T23B3.1			Y25C1A.6
	T23G11.2			Y38C1AB.4
	T23G7.2			Y39A1A.15
	T24H7.3			Y39B6A.5
	T25G3.2			Y39E4B.6
	T27A3.1			Y39G10AR.10
	T28D6.3			Y42H9AR.4
	W01A8.5			Y42H9B.2
	W01F3.2			Y43C5A.5
	W02F12.3			Y43F8A.2
	W02F12.4			Y43F8B.2
	W03C9.2			Y47D7A.1
	W03F8.1			Y48B6A.14
	W03F9.2			Y51B9A.4
	W05F2.3			Y54F10AM.8
	W09B6.3			Y54G2A.6
	W09D10.3			Y55B1BR.3
	W10G6.3			Y55F3AM.12
	Y105E8A.8			Y57A10A.26
	Y105E8B.6			Y57A10A.9
	Y110A7A.18			Y59A8B.1
	Y110A7A.6			Y63D3A.8
	Y111B2A.20			Y66A7A.5
	Y116A8C.9			Y73B6BL.9
	Y14H12B.2			Y75B8A.14
	Y17G7B.4			Y76B12C.7
	Y18D10A.11			Y7A9D.1
	Y18D10A.16			Y9D1A.1
	Y22D7AL.10			ZK1127.4
	Y22F5A.4			ZK1128.5
	Y32F6A.5			ZK1251.6
	Y34D9A.1			ZK131.11
	Y37D8A.4			ZK525.1
	Y38F1A.6			ZK546.1
	Y38F2AR.9			ZK593.6
	Y39A3CR.4
	Y39G10AL.3
	Y40B10A.1
	Y40B10A.8
	Y41D4A.5
	Y42G9A.4
	Y43F4B.4
	Y43F8C.13
	Y43F8C.8
	Y44A6D.2
	Y45F10D.7
	Y46E12A.1
	Y47G6A.2
	Y47G6A.22
	Y47G6A.24
	Y47H9C.7
	Y48E1B.9
	Y48G8AL.6
	Y48G8AL.9
	Y49E10.4
	Y53C12B.3
	Y53F4B.9
	Y53G8B.2
	Y54E5A.6
	Y54F10AM.11
	Y54G11A.3
	Y55D9A.2
	Y56A3A.18
	Y57A10A.29
	Y57E12AL.6
	Y57G11C.4
	Y62E10A.13
	Y65B4BL.5
	Y71F9AL.14
	Y71F9B.2
	Y71G12B.14
	Y71H2AM.10
	Y73B6BL.23
	Y73F8A.34
	Y74C9A.4
	Y76B12C.3
	Y94H6A.8
	Y97E10AR.4
	ZC376.7
	ZC410.7
	ZC416.6
	ZC434.8
	ZC513.6
	ZC53.7
	ZC8.3
	ZK1127.10
	ZK1236.7
	ZK265.5
	ZK596.1
	ZK652.3
