# Supplementary material for: A Comprehensive Analysis of Gene Expression Changes Provoked by Bacterial and Fungal Infection in C. elegans
Source: PLoS One. 2011 May 13;6(5):e19055. doi: 10.1371/journal.pone.0019055 (PMC3094335; doi:10.1371/journal.pone.0019055)
Supplement: Table S10 — Genes regulated by bacterial infection. Lists of genes up-regulated by infection with bacterial pathogens (RNA-seq) (A). Genes up-regulated by infection with all three bacterial pathogens (RNA-seq) (B). Lists of genes down-regulated by infection with bacterial pathogens (RNA-seq) (C). Genes down-regulated by infection with all three bacterial pathogens (RNA-seq) (D). Gene lists are based on WS210. (XLS) [file pone.0019055.s014.xls]

## Sheet: TableS10A
Genes up-regulated by infection with bacterial pathogens (RNA-seq)
Pathogen	E. faecalis only	P. luminescens only	S. marcescens only	E. faecalis + P. luminescens	P. luminescens + S. marcescens	E. faecalis + S. marcescens	All three bacteria
Number of genes	1097	728	853	1122	519	236	668
	AC3.10	B0024.14	AH6.7	4R79.1	B0024.4	AC3.8	AH10.1
	AC3.6	B0035.5	B0035.13	AC3.1	B0218.2	B0034.4	AH10.3
	B0207.1	B0198.3	B0035.2	AC3.3	B0303.8	B0218.6	AH6.10
	B0207.12	B0205.13	B0035.8	AC7.1	B0365.5	B0244.10	B0024.1
	B0207.5	B0218.8	B0222.9	B0024.3	B0365.6	C01B10.4	B0024.15
	B0207.7	B0222.2	B0280.4	B0024.6	B0399.2	C01B7.3	B0205.4
	B0212.6	B0252.2	B0281.1	B0034.3	B0403.5	C01B9.1	B0213.12
	B0213.10	B0272.4	B0281.3	B0034.5	B0491.2	C02C2.4	B0222.4
	B0218.7	B0273.2	B0281.6	B0205.10	B0554.6	C04F12.7	B0222.7
	B0222.1	B0280.2	B0286.3	B0218.5	C01B10.11	C06E4.3	B0252.5
	B0222.10	B0285.9	B0302.5	B0238.12	C01B12.1	C06E7.6	B0304.3
	B0228.4	B0302.2	B0310.5	B0240.2	C01B12.8	C08F1.4	B0344.2
	B0238.13	B0303.7	B0336.11	B0240.3	C01F1.3	C08F11.1	B0393.4
	B0240.1	B0304.8	B0416.4	B0244.5	C01F6.6	C08F11.8	B0393.5
	B0261.6	B0334.6	B0496.3	B0250.1	C01G10.18	C14A11.5	B0395.2
	B0280.13	B0403.3	C01B10.10	B0250.9	C01G10.4	C14C6.2	B0412.1
	B0285.6	B0416.2	C01G10.17	B0280.11	C01G6.7	C15C8.3	B0454.8
	B0294.3	B0507.6	C01G5.9	B0280.12	C01H6.8	C16D9.5	B0495.4
	B0304.7	B0507.8	C01H6.4	B0280.7	C02B4.1	C18D1.2	B0507.7
	B0379.7	B0511.5	C02E7.2	B0286.2	C02F4.4	C23G10.6	BE10.2
	B0393.7	B0523.5	C02H6.2	B0294.1	C02F5.11	C24G7.1	C01B10.6
	B0432.5	C01A2.6	C03B1.14	B0331.2	C02F5.14	C24G7.2	C01F1.5
	B0454.6	C01B7.4	C03B8.3	B0348.5	C02F5.8	C27D8.2	C01H6.1
	B0454.7	C01G12.1	C03D6.1	B0348.6	C03E10.3	C28D4.1	C02B8.5
	B0462.1	C01G12.11	C03E10.5	B0361.11	C03G6.19	C29E4.7	C02D4.1
	B0491.4	C01H6.5	C03F11.3	B0365.7	C04E12.5	C30G12.2	C02D5.1
	B0491.8	C02E7.6	C03G6.18	B0412.2	C04F1.1	C33G3.5	C02G6.1
	B0495.1	C02E7.7	C04F5.7	B0432.1	C05A9.1	C34D4.3	C03B1.2
	B0507.11	C02F5.12	C05B5.5	B0496.2	C05D9.2	C35D10.15	C04G2.9
	B0507.9	C02F5.5	C05C10.4	B0507.1	C06B3.2	C38C6.4	C04G6.1
	B0511.4	C02H6.1	C05C12.3	B0511.2	C06E1.8	C40A11.1	C05D11.6
	B0524.4	C03A7.8	C05C12.4	B0554.5	C07H6.9	C40H1.7	C05D12.3
	B0547.4	C03C10.7	C05C8.7	B0554.7	C08E3.10	C41H7.7	C05E11.7
	B0563.2	C03H5.7	C05D12.4	BE10.1	C08F8.7	C43H6.9	C06B3.3
	B0564.3	C04B4.1	C05D12.5	C01B12.3	C09F12.1	C44B7.11	C06B3.8
	C01A2.7	C04E12.7	C05D2.4	C01B12.5	C09G5.3	C44C1.5	C06E1.3
	C01F1.4	C04E6.12	C05D2.8	C01G10.1	C09G9.3	C45E5.1	C06E1.7
	C01G5.2	C04G6.13	C05E11.5	C01G12.10	C10G11.10	C47A10.5	C06E2.1
	C02A12.1	C05D11.7	C05E7.2	C01G12.2	C10H11.4	C47E12.9	C06G1.1
	C02B8.3	C05E4.12	C06B8.1	C01G12.6	C11H1.5	C49F5.1	C07A9.4
	C02D5.3	C05E7.1	C06B8.2	C01G12.8	C11H1.9	C50H11.15	C07A9.8
	C02E7.4	C06A1.1	C06C3.6	C01G5.3	C12D12.1	C50H2.4	C07E3.5
	C02E7.5	C06B3.7	C06G8.3	C01G5.4	C13D9.9	C52D10.3	C07G1.1
	C03G6.12	C06G1.5	C06H2.4	C01G8.1	C14F11.6	C53A3.2	C08H9.1
	C03G6.13	C07A4.2	C06H5.1	C02D4.2	C14H10.3	C55B7.3	C09B8.4
	C03G6.15	C07A9.9	C07A9.11	C02D5.2	C15B12.7	C55B7.4	C09D1.2
	C03G6.17	C07E3.3	C07A9.6	C02E7.1	C15C6.1	D1022.3	C09E7.10
	C03H5.6	C07E3.8	C07B5.6	C02F12.1	C15F1.2	D2096.3	C09E8.2
	C04A11.1	C07E3.9	C07E3.10	C02H7.2	C16C10.13	E02H4.5	C09G12.1
	C04C3.2	C07G2.1	C08B6.11	C03A3.1	C17B7.5	E04F6.7	C09H5.2
	C04E12.12	C07G2.3	C08B6.3	C03A3.3	C17C3.1	F01E11.5	C10C5.5
	C04E12.4	C07G3.2	C08F1.5	C03A7.14	C17C3.15	F07A5.2	C10H11.3
	C04E6.10	C07G3.5	C08F11.13	C03A7.9	C17G10.5	F07B7.12	C12C8.2
	C04E6.2	C08A9.9	C08F11.5	C03C10.2	C17H1.3	F07G11.4	C12D8.18
	C04E6.5	C08E3.3	C09G5.5	C03G6.14	C17H1.5	F08H9.9	C13C12.2
	C04G2.4	C08E3.4	C10F3.6	C04E12.2	C17H12.6	F09G8.5	C15A11.3
	C05C12.5	C08E8.4	C10G8.3	C04F5.2	C17H12.8	F10B5.4	C15H11.13
	C05D2.3	C09E7.2	C12D12.5	C04G2.2	C18B2.5	F11A5.13	C15H11.2
	C05E11.4	C09F9.2	C12D8.5	C04G2.8	C18H7.11	F12D9.1	C16C4.5
	C05E4.11	C09H5.5	C13C4.1	C04G6.10	C18H9.6	F13A7.10	C16C8.2
	C05E4.4	C10C5.2	C13C4.6	C04G6.7	C23H4.4	F13E9.10	C16D9.2
	C06A12.4	C10C5.3	C13D9.1	C04H5.3	C26B9.2	F13H10.9	C17B7.8
	C06A12.5	C10H11.6	C14A6.1	C05B5.2	C26B9.3	F14D7.6	C17C3.12
	C06A6.7	C11E4.8	C14C11.3	C05B5.6	C26B9.7	F15B9.2	C17E7.8
	C06A8.1	C12C8.1	C14C11.4	C05C12.1	C26C6.3	F15E6.5	C17H1.6
	C06A8.6	C12D5.11	C14C6.12	C05C9.1	C27A2.4	F16F9.3	C17H1.9
	C06A8.7	C12D8.11	C14C6.5	C05C9.2	C29E4.1	F18E2.1	C17H12.12
	C06C3.8	C13A2.12	C15C7.5	C05C9.3	C29F3.7	F18E9.7	C17H12.5
	C06C6.6	C13G3.1	C15C7.6	C05D10.2	C29F4.1	F19C7.5	C18B10.6
	C06E1.4	C14A4.13	C15C7.7	C05D12.1	C29F9.4	F20G2.1	C18B2.1
	C07C7.1	C14A4.8	C15C8.4	C06A5.2	C30F8.3	F21F8.11	C18B2.2
	C07E3.4	C14B9.3	C15F1.6	C06C3.3	C31A11.5	F21F8.6	C18D11.7
	C07G3.10	C15B12.8	C15H9.7	C06E7.1	C31H2.2	F22A3.6	C18D4.2
	C08B6.4	C16A3.7	C16A3.10	C06G1.2	C32H11.5	F22B3.9	C18E9.5
	C08F11.3	C16C10.12	C16C8.10	C06H2.5	C33C12.3	F22E10.2	C18E9.8
	C08H9.10	C17A2.5	C16D9.4	C07D10.3	C33D9.3	F23F12.13	C23H5.7
	C08H9.11	C17C3.4	C16H3.2	C07D8.2	C34C12.6	F25C8.1	C24B5.3
	C08H9.13	C17C3.5	C17B7.11	C07F11.2	C34G6.6	F25E5.10	C24G6.7
	C08H9.14	C17E7.3	C17F4.2	C07G1.2	C34H4.1	F26F2.1	C25A8.5
	C08H9.4	C17G1.1	C17F4.7	C07G3.3	C34H4.2	F27C8.1	C25D7.4
	C08H9.6	C17H1.14	C17G1.2	C08E3.15	C34H4.3	F27C8.2	C25E10.4
	C08H9.7	C17H1.4	C17G1.3	C08F11.10	C35A5.3	F28A12.4	C26B2.3
	C09D1.1	C18B2.4	C17H1.7	C08F11.14	C36B7.5	F29C6.1	C26F1.6
	C09F12.2	C18B2.6	C17H12.4	C08F8.6	C37E2.2	F32H5.4	C27A7.2
	C09F9.1	C18D11.10	C18A11.3	C08G9.2	C38C6.6	F35D11.10	C27D8.1
	C09G1.5	C18D4.3	C18C4.3	C08H9.12	C38H2.2	F35D11.8	C28C12.4
	C09G5.6	C18H9.1	C18E9.9	C08H9.5	C39E9.3	F36F12.6	C28H8.5
	C09H10.8	C23G10.4	C23H4.2	C09B7.1	C40H1.4	F36G9.5	C29F3.1
	C09H10.9	C23H3.7	C23H4.3	C09B8.3	C41A3.1	F36H1.5	C29F3.2
	C09H5.4	C23H4.6	C23H4.7	C09B9.3	C41G7.5	F36H5.1	C30F12.1
	C09H5.6	C24B5.5	C23H5.1	C09B9.4	C42D4.13	F38A1.10	C30G12.1
	C10E2.6	C25B8.5	C23H5.8	C09B9.7	C42D4.3	F38A1.4	C30G12.3
	C10G8.5	C25F9.13	C24A11.2	C09D4.3	C43D7.5	F38A1.7	C30G4.2
	C11D2.2	C25F9.2	C24F3.6	C09E8.3	C43F9.11	F38E11.9	C30H6.1
	C11E4.2	C25F9.5	C24H11.3	C09F12.3	C44B7.9	F39E9.12	C30H6.2
	C12D12.2	C25G4.10	C24H12.8	C09G1.1	C44C10.1	F41H10.8	C30H6.5
	C12D5.9	C26F1.5	C25A8.1	C09G1.2	C44F1.1	F42A9.9	C31A11.1
	C13B9.4	C27A12.8	C25B8.3	C09G12.17	C44H4.2	F43E2.5	C32B5.8
	C14A4.15	C27A7.6	C25F9.4	C09G5.1	C44H4.3	F44D12.9	C32E12.3
	C14A6.2	C27C7.3	C26B2.2	C09H5.7	C45B2.7	F44E7.2	C32H11.1
	C14B9.1	C27D9.2	C26B9.5	C10A4.5	C45G7.5	F44F4.7	C33A12.6
	C15A7.4	C27H2.2	C26C6.9	C10A4.7	C46C2.6	F46E10.1	C33B4.2
	C15B12.4	C27H5.5	C26G2.2	C10C6.2	C46F4.3	F46G10.6	C33D3.3
	C15B12.5	C27H5.6	C27D8.3	C10F3.3	C47B2.6	F47C12.6	C33G3.3
	C15C8.5	C29E4.8	C28G1.1	C10G11.8	C47B2.8	F47G4.7	C33H5.2
	C15C8.7	C30B5.3	C28G1.5	C12D12.3	C48B4.1	F47H4.7	C34B7.3
	C16A11.7	C30B5.6	C28H8.11	C12D5.10	C49A9.5	F48F5.4	C34E10.9
	C16A11.8	C30C11.2	C29F3.5	C12D5.4	C49C3.9	F49A5.2	C35A11.4
	C16C10.9	C30C11.4	C29F7.1	C12D8.19	C49C8.5	F49A5.4	C35A5.5
	C16C4.14	C30E1.8	C29F9.10	C12D8.8	C49F8.3	F49A5.5	C35C5.2
	C16C4.4	C31A11.7	C29F9.3	C13D9.7	C49G7.12	F49E11.4	C36A4.2
	C16C8.8	C32E8.8	C30F2.4	C14A6.3	C50B6.4	F53F8.2	C36B7.7
	C16D6.2	C32F10.1	C30G12.4	C14C10.1	C50D2.1	F54B11.11	C36C9.4
	C16D9.1	C33F10.7	C30H6.8	C14C11.1	C50E10.10	F54F3.1	C36H8.1
	C17A2.8	C33H5.1	C31B8.7	C14C11.2	C52B9.6	F55B12.9	C37C3.10
	C17B7.2	C34B2.11	C32H11.12	C14C11.8	C53D6.11	F55F3.2	C38C6.3
	C17C3.6	C34D4.9	C32H11.4	C15A11.1	C54D1.2	F55G11.1	C39B5.3
	C17D12.5	C34E7.4	C33C12.11	C15C6.2	D1007.3	F55G11.2	C39D10.6
	C17E7.13	C34G6.1	C33C12.4	C15C7.4	D1025.3	F55H12.3	C39H7.9
	C17E7.5	C35A5.2	C33C12.7	C15C8.2	D1054.5	F57F5.1	C40A11.8
	C17E7.7	C38D9.8	C33D3.1	C15H11.10	D2013.3	F58A6.2	C41G6.14
	C18A11.7	C39B5.1	C33D9.10	C15H9.2	D2024.3	F58A6.5	C41G7.6
	C18D4.6	C39B5.7	C33G8.3	C15H9.3	D2092.8	F58A6.9	C42D4.2
	C18E3.1	C39B5.8	C33G8.8	C16A11.1	E02C12.8	F58B3.3	C42D8.5
	C18F10.8	C39F7.4	C34B4.7	C16B8.2	E04D5.3	F58B6.1	C43G2.5
	C18G1.6	C44B11.3	C34D1.5	C16C8.18	EGAP7.1	F58E6.4	C43H6.6
	C18G1.8	C44E12.3	C34F6.11	C16E9.4	F01D4.2	F58G6.9	C44B11.1
	C18H2.5	C44H9.7	C34F6.3	C17B7.10	F01D5.1	H01G02.2	C44B7.8
	C18H7.4	C46C2.4	C35A11.2	C17B7.4	F01D5.10	H03G16.2	C44C10.3
	C23H5.9	C46H11.11	C35B1.7	C17C3.18	F01D5.2	K02E11.1	C45G9.10
	C24A8.1	C47E12.5	C35D10.5	C17D12.6	F01D5.3	K02E11.4	C45G9.6
	C24D10.2	C49A9.8	C36A4.1	C17E7.6	F01D5.5	K04H8.3	C45H4.2
	C24D10.7	C49G7.5	C37C3.3	C17G10.3	F01G10.3	K05B2.5	C46E1.2
	C25E10.2	C50E10.11	C37E2.5	C17H11.1	F02C12.5	K08D8.3	C46E1.3
	C25E10.3	C50F2.6	C39H7.4	C17H12.3	F07B10.1	K09A11.3	C47A4.2
	C25E10.5	C52A10.1	C40D2.4	C18A3.4	F07C3.1	K09G1.4	C47E12.6
	C25G4.6	C52B9.7	C43F9.10	C18C4.1	F07C6.2	K10B2.2	C48E7.8
	C25H3.15	C52E4.4	C43F9.8	C18C4.2	F07G6.7	K10C2.3	C49A9.1
	C25H3.16	C53B4.6	C44B7.5	C18E3.4	F08A8.1	K11H12.11	C49C3.4
	C26B2.4	C53B4.8	C44B7.7	C18E3.7	F08A8.2	M04D8.6	C49C8.1
	C27A2.7	C53C7.3	C44C10.11	C18E9.7	F08F1.6	M05D6.4	C49F5.8
	C27A7.4	C54A12.1	C44H4.5	C18F10.2	F08G5.4	M7.10	C50C3.5
	C27C12.6	C54D10.12	C44H9.5	C18F10.5	F08G5.6	R03G5.5	C50F4.10
	C27H5.7	C54D10.13	C44H9.6	C18H7.2	F09F9.2	R04B5.8	C50F7.5
	C27H5.8	C54D10.14	C45B11.3	C18H9.5	F10A3.3	R04E5.10	C53B4.7
	C27H6.1	C54E10.3	C45E1.4	C18H9.8	F10D2.1	R04E5.2	C54A12.2
	C28F5.2	C55A6.5	C45H4.1	C23G10.1	F10D2.10	R05A10.3	C54C8.4
	C28H8.8	C55A6.6	C45H4.17	C24A3.1	F10D2.11	R06B9.2	C54F6.12
	C29A12.6	C55C3.7	C46A5.8	C24F3.3	F10E7.1	R07B1.4	C55B7.12
	C29E4.10	C56E10.3	C46F2.1	C24F3.5	F11A1.2	R07B7.14	C55C3.6
	C29E4.9	CD4.5	C46G7.2	C24H11.4	F11A6.2	R07B7.15	C56C10.4
	C29F5.2	D1005.1	C46G7.4	C25F6.7	F11E6.9	R07E3.4	C56E6.5
	C29G2.3	D1005.3	C47A4.1	C25G4.8	F11G11.10	R08A2.1	D1007.1
	C29G2.5	D1046.4	C47D2.2	C25G6.3	F11G11.12	R08C7.4	D1014.5
	C30A5.4	D1046.5	C48B4.12	C25G6.5	F12F6.9	R09B5.4	D1044.3
	C30A5.5	D1054.7	C49A9.4	C26B2.8	F13B6.1	R09D1.10	D2024.4
	C30D11.1	D1069.2	C49A9.9	C26C6.4	F13B6.2	R52.8	E02C12.6
	C30E1.5	D2013.2	C49C3.11	C26C6.7	F13D12.6	T01B11.2	E03G2.4
	C30F2.2	D2021.2	C50A2.3	C26D10.5	F13G3.3	T01C8.3	E03H12.5
	C30F2.3	D2030.9	C50B6.8	C26G2.1	F14B8.5	T02B5.1	EGAP2.3
	C30G4.3	D2063.1	C50B8.5	C27A7.7	F14E5.1	T03D3.1	F01D5.6
	C30G7.3	DC2.2	C50F4.3	C27B7.6	F15B9.1	T05A12.2	F01G10.10
	C30H6.3	DC2.5	C50H2.1	C27D6.11	F15B9.6	T05E12.6	F01G10.4
	C31B8.16	E01G4.6	C52B9.2	C27D9.1	F15B9.8	T05E7.2	F01G10.6
	C31C9.1	E02H1.6	C52D10.1	C27F2.2	F16F9.2	T07E3.4	F02A9.1
	C31H1.2	E02H4.2	C52E4.5	C28D4.5	F17A9.3	T07G12.5	F02C12.4
	C31H1.5	E02H9.5	C53B4.3	C29E6.4	F17C11.11	T09F5.9	F02E11.1
	C31H2.3	E03H12.3	C53D5.5	C29F4.3	F17C11.3	T10H4.4	F02E9.3
	C31H5.1	E03H4.10	C53D6.6	C29F7.6	F18C5.5	T10H4.9	F07A11.1
	C32B5.13	E03H4.7	C54C6.6	C30A5.10	F18E9.4	T10H9.5	F07E5.1
	C32C4.1	EGAP1.3	C54D10.1	C30B5.7	F19B2.5	T13F2.4	F07F6.5
	C32D5.4	EGAP9.2	C54E4.3	C30E1.7	F19C7.1	T15B7.14	F07F6.9
	C32E12.1	EGAP9.4	C54F6.13	C30F12.6	F19C7.7	T19D12.1	F07G6.6
	C32E8.4	F01F1.8	C54F6.14	C32B5.4	F19H8.4	T19H12.9	F07H5.9
	C33A12.14	F01G12.6	C54G7.2	C32D5.14	F19H8.5	T20B3.12	F08G5.7
	C33F10.5	F02E11.3	C55A6.11	C32E12.2	F20D6.3	T20B3.15	F09A5.2
	C33G8.12	F02E8.6	C55A6.12	C32E8.6	F20D6.6	T20B3.16	F09B12.1
	C33G8.5	F07A11.2	C55A6.4	C33A12.13	F20G2.3	T20D4.1	F09C12.2
	C34B2.3	F07A11.4	C55A6.7	C33F10.1	F20G2.5	T20D4.13	F09E5.10
	C34B4.2	F07C3.8	C55B6.2	C33F10.11	F21C10.6	T20H9.1	F09F3.9
	C34D4.1	F07E5.8	C56E10.4	C33H5.16	F21F8.4	T20H9.4	F09G2.6
	C34E11.2	F07F6.6	C56E6.2	C33H5.4	F22A3.1	T21D12.11	F09G8.8
	C34F11.4	F08B1.1	D1007.2	C34C6.3	F22E5.1	T25D10.5	F10A3.1
	C34F11.5	F08C6.4	D1009.1	C34D4.2	F22E5.4	T26C12.2	F10A3.2
	C35D10.14	F08C6.6	D1025.2	C34F11.1	F22G12.1	T28F4.3	F10B5.3
	C35E7.2	F08F3.4	D1037.2	C34F6.1	F22G12.7	VC5.3	F10C2.7
	C36C9.5	F08G2.5	D1037.3	C35A5.1	F22H10.2	W02G9.2	F10D11.5
	C36E6.8	F09E8.1	D1053.1	C35B1.8	F23H12.5	W03D2.6	F10D11.6
	C36H8.2	F10C2.3	D1054.8	C35C5.11	F25D7.3	W05E10.4	F10D2.2
	C37C3.12	F10D2.6	D1086.3	C35C5.5	F25E2.4	W07A12.6	F10F2.3
	C38C3.7	F10G7.8	D1086.4	C35D10.2	F26G1.5	W07B8.1	F11C1.3
	C38D9.1	F11A5.3	D2023.7	C36A4.3	F27C1.8	W07G1.2	F11C7.6
	C38D9.6	F11E6.8	D2024.10	C36A4.5	F28A12.2	Y105C5B.8	F11D11.11
	C38D9.7	F11G11.1	D2092.1	C37A2.3	F29G6.3	Y113G7A.14	F11D11.3
	C39B10.1	F12F6.8	D2096.2	C37H5.11	F30A10.2	Y119D3B.8	F11D5.7
	C39B5.11	F13A7.11	E01A2.7	C38C10.4	F30B5.1	Y16B4A.2	F11E6.10
	C39D10.5	F13A7.12	E02C12.4	C39B10.2	F31D5.5	Y18D10A.22	F11G11.9
	C39E6.6	F13A7.2	E02H9.3	C39B10.5	F31F6.5	Y22D7AL.11	F13A7.9
	C39E9.10	F13D11.4	E02H9.8	C39B5.12	F32A5.8	Y27F2A.3	F13B12.4
	C39E9.2	F13E9.9	E03E2.1	C39H7.1	F32D8.3	Y34D9A.11	F13D12.9
	C40C9.2	F13G3.2	E03G2.1	C40C9.1	F32E10.3	Y37A1B.15	F13H8.5
	C40D2.3	F13H8.4	E04D5.5	C40H1.8	F32H2.8	Y38F1A.6	F15A2.5
	C40H1.3	F14B4.2	E04F6.15	C40H5.4	F33A8.7	Y39B6A.41	F15E11.4
	C40H5.7	F14B8.7	E04F6.3	C40H5.5	F33H12.2	Y46C8AL.3	F15H10.8
	C41C4.1	F14D12.6	E04F6.6	C41G6.2	F33H12.5	Y46D2A.3	F16H6.1
	C41C4.3	F14D2.14	F01D4.1	C41G7.2	F33H2.8	Y47D7A.16	F17A2.3
	C41D7.2	F14E5.5	F01D4.6	C42C1.2	F35B12.2	Y47H9C.10	F17B5.6
	C41G6.10	F14F3.4	F01F1.13	C42C1.3	F35B3.4	Y4C6B.2	F17C8.7
	C42D8.4	F14F9.2	F01G10.2	C43C3.2	F35C5.5	Y51A2D.4	F17E9.5
	C43E11.6	F14F9.3	F01G12.2	C43D7.8	F35C5.9	Y51H4A.10	F18A1.1
	C44B7.6	F14F9.4	F02D10.5	C43F9.5	F35D2.2	Y53F4B.32	F18F11.4
	C44C3.7	F14F9.7	F02E11.4	C43F9.6	F35E12.10	Y54G11A.12	F19C7.4
	C44F1.2	F15A8.6	F07A11.5	C44B7.3	F35E12.3	Y54G2A.39	F19C7.6
	C44H9.1	F15B10.1	F08A8.3	C44B9.2	F35E12.5	Y57A10B.5	F21F3.2
	C44H9.2	F15B9.7	F08A8.4	C44H4.1	F35E12.7	Y67A10A.10	F21H7.14
	C45E5.4	F15D4.4	F08B12.2	C45B11.5	F35E12.8	Y69E1A.8	F22B5.5
	C45G9.9	F15E6.2	F08C6.2	C45B2.4	F35E12.9	Y69F12A.1	F22E10.1
	C45H4.16	F15H10.1	F08F1.3	C45G9.11	F35E8.8	Y6G8.2	F22F4.1
	C46E10.1	F15H9.4	F08F3.3	C46A5.2	F36A4.10	Y71G12B.18	F23B2.12
	C46E10.5	F16B4.2	F08G2.8	C46A5.3	F36G3.1	Y71G12B.7	F23C8.1
	C47A10.1	F16B4.3	F08G5.5	C46A5.4	F36G9.13	Y73B6A.3	F23F12.4
	C47A4.3	F16B4.9	F08H9.6	C46E10.8	F36H9.5	Y73E7A.3	F23H12.4
	C47C12.6	F16H6.10	F08H9.7	C46H11.7	F37B1.2	Y9C9A.6	F25A2.1
	C47E12.11	F17B5.10	F08H9.8	C46H11.8	F37C4.1	ZC376.2	F25D1.3
	C47E8.2	F17E9.11	F09B12.3	C46H11.9	F38A5.3	ZC412.4	F25D1.5
	C47E8.6	F18A1.7	F09B12.6	C46H3.3	F38B6.5	ZC47.3	F25E5.2
	C48A7.1	F19B10.13	F09C6.10	C47F8.6	F39D8.3	ZK105.5	F25F2.1
	C48B6.8	F19F10.8	F09C8.1	C48C5.1	F39E9.1	ZK1053.5	F25H8.6
	C48C5.3	F20A1.8	F09E5.11	C48D5.1	F40F4.6	ZK1240.1	F25H9.3
	C48D1.3	F20B6.3	F09F7.4	C48D5.3	F40F8.7	ZK218.1	F26A1.9
	C49C8.4	F20C5.4	F09F7.5	C49A1.3	F41B5.2	ZK265.1	F26A3.5
	C49D10.8	F20D1.4	F10B5.9	C49C3.13	F41B5.3	ZK484.2	F26B1.4
	C50B6.11	F21C3.7	F10C1.8	C49F5.4	F41C6.5	ZK524.1	F26D2.3
	C50B6.6	F21F3.4	F10C1.9	C49G7.3	F41F3.3	ZK666.8	F27B3.2
	C50D2.2	F21H12.5	F10D2.8	C49G7.4	F42A9.4	ZK742.3	F28A12.1
	C50E3.16	F22B3.4	F10D2.9	C49G7.8	F42C5.10	ZK822.4	F28B4.3
	C50F2.5	F22B7.10	F10E9.5	C49H3.1	F43C1.5		F28G4.2
	C50F4.8	F22E10.5	F10F2.5	C50B6.5	F43G9.8		F28G4.4
	C50H11.10	F22G12.3	F11E6.3	C50B6.7	F44E7.8		F29C12.1
	C50H11.8	F23F12.6	F11E6.5	C50C3.2	F44F4.11		F31F4.11
	C50H2.5	F25B3.5	F11G11.3	C50D2.3	F44G3.14		F31F7.2
	C52A10.2	F25D7.5	F12E12.4	C50F4.2	F46C3.3		F32B4.8
	C52A11.3	F25G6.7	F12E12.9	C50H2.12	F46G10.3		F32B6.10
	C52E2.5	F25H2.1	F13B6.3	C52E4.7	F46G10.4		F32B6.4
	C52E4.1	F26A10.2	F13E6.5	C53A5.4	F46G11.2		F32B6.5
	C53B4.1	F26D10.10	F13G3.1	C53A5.9	F47B10.2		F32D8.2
	C53B7.1	F26E4.7	F13H8.11	C53C7.1	F47B8.5		F32E10.7
	C53B7.5	F26F2.4	F13H8.3	C53D6.3	F47F6.1		F33D11.3
	C53C9.2	F26F4.3	F14B6.6	C54D10.4	F47G9.3		F33D11.4
	C53C9.3	F26G1.3	F14D7.5	C54D2.1	F48F7.7		F33D4.6
	C54D10.3	F26H9.8	F14H3.11	C54F6.10	F48G7.13		F35C5.7
	C54D10.9	F28B12.2	F14H3.3	C54F6.4	F49C12.6		F35D11.7
	C54E4.4	F28D1.9	F15A2.2	C54F6.8	F49C12.7		F35E8.11
	C54G4.2	F28D9.2	F15B9.3	C54F6.9	F49E12.12		F35F10.4
	C55A1.14	F28H7.8	F15E11.12	C54G4.4	F49E12.9		F35F10.7
	C55B7.6	F29B9.9	F15E11.15	C54G7.3	F49F1.1		F36D3.4
	C55C2.5	F29F11.2	F17C11.12	C55C3.1	F49F1.10		F36D4.1
	C55C3.8	F29G6.1	F17C11.5	C56A3.3	F49F1.7		F37B1.8
	C56G3.2	F29G9.5	F19C7.2	C56E6.6	F49H6.13		F37B12.1
	D1009.3	F31A9.3	F19H6.1	C56G2.4	F52D1.1		F37B4.7
	D1014.1	F31D4.4	F19H6.5	D1005.6	F52F10.3		F38A1.9
	D1044.7	F31D5.4	F19H6.7	D1007.13	F53B1.6		F38H4.4
	D1054.12	F32A7.5	F19H8.2	D1022.9	F53B2.8		F39D8.2
	D1079.1	F32H2.5	F20G2.6	D1037.5	F53C11.1		F39G3.2
	D2005.2	F33A8.10	F21D5.3	D1044.8	F53F1.1		F40D4.12
	D2005.6	F33C8.1	F21F8.3	D1054.9	F53F1.4		F40F9.3
	D2062.1	F33E2.10	F21H12.7	D1065.5	F53F8.1		F41B5.7
	D2062.7	F33E2.2	F21H7.1	D1069.1	F53H4.3		F41C3.11
	D2092.3	F35B3.1	F21H7.12	D1069.4	F54D5.4		F41D9.2
	DH11.1	F35E12.4	F21H7.3	D1081.5	F54E2.1		F41E6.14
	DH11.2	F35G12.12	F21H7.4	D2023.3	F54F7.2		F41H10.7
	E02C12.2	F35G2.1	F22A3.7	D2092.6	F55F8.1		F42A9.7
	E02H4.7	F35H10.10	F22D6.15	D2096.6	F55F8.8		F42E11.3
	E03D2.1	F36A2.3	F22F1.3	DY3.5	F55G1.15		F42G2.4
	E03H4.11	F36A4.6	F22F4.4	E01G6.1	F55G11.4		F43H9.2
	E03H4.4	F36D3.9	F22F7.1	E02A10.2	F55G11.5		F44C4.3
	E04A4.6	F36D4.3	F22H10.6	E02C12.10	F55G11.7		F44C8.7
	F01D4.3	F36D4.5	F23A7.5	E03A3.6	F55G11.8		F44E2.4
	F01D4.4	F36F12.3	F23F12.3	E03H12.6	F56C9.7		F44E5.2
	F01D4.7	F36H1.4	F25B4.4	E04A4.2	F56H1.1		F44E7.7
	F01E11.1	F36H5.3	F25C8.2	EEED8.6	F57B1.3		F44F4.6
	F01E11.4	F36H5.5	F25G6.8	F01D4.8	F57B7.3		F44G3.10
	F01G10.5	F37B1.5	F25H9.2	F01D5.7	F57C12.1		F45E1.5
	F02D8.3	F38A1.15	F26A1.12	F02C12.2	F57C12.3		F45E4.6
	F02G3.1	F38A3.1	F26D10.13	F02D8.2	F57F4.3		F45F2.6
	F02H6.1	F38A3.2	F26G1.4	F07B10.2	F58A6.4		F46A8.5
	F02H6.6	F38B6.7	F28A12.3	F07B10.7	F58G1.5		F46A9.3
	F07A5.5	F38H4.2	F28C6.1	F07C3.3	F58H1.4		F46B3.1
	F07C3.7	F39B3.2	F28E10.5	F07E5.9	F58H1.6		F46B3.5
	F07C4.11	F39C12.3	F28F5.6	F07H5.6	F59B1.8		F46B6.9
	F07F6.1	F39G3.4	F28H6.2	F08A10.1	F59B10.1		F46C8.6
	F07G11.9	F40B5.2	F28H7.3	F08B4.2	F59F5.7		F46C8.8
	F08F1.1	F40E10.5	F30F8.5	F08C6.1	H02F09.3		F46F11.3
	F08F8.6	F40G12.9	F31D4.8	F08D12.2	H10E21.4		F47B8.11
	F08G5.2	F40H7.12	F31F4.15	F08D12.3	H19M22.3		F47C10.6
	F08H9.12	F41A4.1	F32A7.6	F08G2.6	H20E11.1		F47F6.3
	F09C12.1	F41B5.8	F32A7.7	F09C12.8	H20E11.2		F48A11.2
	F09C3.2	F41C6.1	F32G8.2	F09C6.1	JC8.12		F48B9.5
	F09C6.11	F41D3.7	F32H5.1	F09C6.13	K01D12.11		F48C1.7
	F09C6.3	F41F3.8	F33D4.1	F09C6.2	K02E11.10		F49F1.6
	F09E10.7	F41G3.17	F33D4.2	F09E5.4	K03A1.5		F52B11.3
	F09E8.5	F42A8.1	F33E2.7	F09E8.6	K04A8.6		F52D1.3
	F09F3.10	F42C5.3	F35C11.4	F09G8.4	K04G2.7		F52D10.5
	F09G2.5	F42G8.8	F35C11.6	F10D2.4	K05B2.4		F52D2.8
	F10F2.4	F42H10.5	F35C5.2	F10D2.5	K06A4.1		F52F10.2
	F10F2.7	F43C1.1	F35C5.4	F10E7.10	K06A4.4		F52F10.4
	F10F2.8	F43C1.7	F35C5.6	F10F2.6	K06G5.1		F53B1.4
	F10G2.3	F43E2.4	F35C5.8	F10F2.9	K08B4.3		F53B3.6
	F10G2.7	F43E2.8	F35E12.1	F10G7.12	K08D8.6		F53C3.1
	F10G7.7	F44E2.2	F35E12.6	F10G8.9	K08E5.3		F53F1.5
	F11A5.10	F44F4.4	F35E2.2	F11A5.4	K08E7.7		F54A5.3
	F11A5.5	F45E10.1	F35E8.12	F11C7.7	K08E7.9		F54B11.2
	F11C1.4	F45E10.2	F35E8.2	F12E12.11	K08F8.4		F54B11.9
	F11C3.2	F45E6.4	F35F10.5	F13A2.2	K08F8.7		F54D1.1
	F11C7.2	F45H7.4	F35G2.5	F13B12.3	K09C4.5		F54D10.4
	F11C7.3	F46C8.2	F35H12.5	F13C5.3	K09C8.1		F54F11.2
	F11D11.5	F47A4.5	F35H8.7	F13D11.2	K09E9.1		F54F3.3
	F12A10.4	F47B8.10	F36G9.11	F13D2.1	K10D11.5		F54H5.2
	F12F3.1	F48C5.1	F36G9.12	F13E9.14	K10H10.2		F55A11.5
	F13C5.5	F48E3.9	F36G9.14	F13E9.8	K11H12.10		F55C5.9
	F13E9.4	F48G7.5	F36G9.8	F13H6.3	K11H12.3		F55D12.4
	F13G3.8	F49C12.2	F36H1.10	F14B6.2	K11H12.4		F55F3.4
	F13H10.5	F49C12.3	F36H12.16	F14D7.8	M02F4.7		F55G1.12
	F13H8.6	F49C12.8	F36H2.5	F14F9.1	M02H5.11		F55G11.9
	F14B6.4	F49D11.2	F37C4.6	F14H12.1	M02H5.6		F56A12.2
	F14B6.5	F49E11.2	F38A1.1	F14H12.2	M02H5.7		F56D2.8
	F14F11.1	F49E12.10	F38B6.4	F14H12.3	M04C7.4		F56D3.1
	F14F4.3	F49E2.1	F38B7.2	F14H3.10	M151.6		F56D6.14
	F14F7.3	F49E8.3	F38C2.4	F14H8.4	M199.5		F56D6.2
	F14F8.8	F49F1.8	F38C2.7	F15A2.3	M28.10		F57B7.2
	F14H3.8	F49H12.7	F39E9.11	F15A4.9	M28.8		F57B9.9
	F15A4.5	F49H6.8	F39E9.2	F15D3.4	M88.1		F57F4.1
	F15A4.6	F52B11.4	F40F12.7	F15G9.4	R05D3.12		F57F4.4
	F15A4.8	F52C9.5	F40F8.5	F15G9.6	R05H10.6		F57F5.2
	F16B12.1	F52H3.1	F40F9.5	F15H10.7	R07B1.13		F57G12.2
	F16B12.8	F53A9.1	F40F9.9	F16D3.7	R07E5.4		F58A4.11
	F17A2.1	F53A9.2	F41C6.4	F16H6.2	R07G3.6		F58B4.1
	F17B5.1	F53B2.2	F41C6.7	F18A11.1	R08F11.3		F58B4.2
	F17B5.5	F53B6.9	F41E6.12	F18A12.1	R08F11.4		F59A3.8
	F17E9.8	F53C11.2	F41E6.2	F18C5.1	R09A1.3		F59A6.4
	F18C12.1	F53F4.5	F41H10.3	F18E2.6	R10H1.4		F59C6.8
	F18C12.4	F53F4.9	F42A10.9	F18E3.6	R11A8.3		F59D12.3
	F18G5.4	F54A3.4	F42C5.7	F18F11.3	R11G11.6		F59E11.2
	F19C7.8	F54B11.8	F42G2.5	F19B6.4	R12E2.5		F59E12.4
	F20D12.3	F54B8.2	F42G2.8	F19C6.3	R17.3		F59F5.5
	F20D6.1	F54B8.3	F42G4.5	F19G12.7	R186.6		H02F09.2
	F20H11.5	F54D1.6	F42G8.11	F20A1.4	T01B10.2		H03E18.1
	F21A3.1	F54D10.9	F42G9.5	F20A1.7	T01B7.7		H04M03.1
	F21A3.7	F54D12.1	F43C9.1	F20D1.7	T01D1.4		H04M03.4
	F21C10.8	F54D12.2	F43G9.13	F20G2.4	T01D1.8		H19J13.1
	F21C10.9	F54E4.1	F44A6.3	F21F8.10	T01D3.6		H23L24.4
	F21D12.1	F54F11.1	F44C8.1	F21H7.5	T03F7.6		H25K10.1
	F21D12.3	F54F7.7	F44C8.9	F22B8.4	T05B11.4		H25K10.4
	F21D9.2	F54H12.2	F44E7.5	F22E10.3	T05C1.3		H37A05.2
	F21F3.1	F55C9.8	F44G3.6	F22E5.3	T05C12.10		H42K12.3
	F21H11.2	F55E10.1	F45B8.2	F23B12.1	T06E4.6		H43E16.1
	F21H7.10	F55F1.3	F45E1.3	F23B2.4	T06E6.5		K01A2.11
	F22B5.3	F56B3.2	F45E1.4	F23H11.6	T06G6.6		K02A2.5
	F22D6.11	F56B3.9	F45E4.1	F23H12.6	T07H3.2		K02A4.1
	F22F7.3	F56C11.6	F45E4.8	F25B3.4	T07H8.6		K02C4.2
	F22F7.6	F56D1.6	F45G2.8	F25D1.4	T08B2.3		K02D3.2
	F23B2.7	F56D2.5	F46A9.1	F25E2.1	T08G2.2		K02E10.4
	F23C8.7	F56E10.2	F46C5.10	F25F6.1	T09F5.1		K02F6.1
	F23D12.3	F56F4.9	F46E10.11	F25G6.6	T10B10.1		K03B8.2
	F23F12.8	F57B9.10	F46F11.5	F25H5.7	T10H10.1		K03H1.13
	F23H11.7	F57B9.3	F46H5.8	F25H8.3	T10H4.12		K03H6.1
	F23H12.9	F57C12.4	F47B10.3	F26A1.8	T11F8.2		K03H9.2
	F25C8.5	F57E7.1	F47B10.7	F26A3.6	T11F9.9		K04E7.1
	F25D1.2	F57F5.3	F47B8.4	F26D2.10	T12A7.4		K04H4.6
	F25E5.7	F57G4.4	F47G4.3	F26F12.4	T13A10.12		K05F1.9
	F25H9.1	F58A6.1	F47H4.9	F26F4.2	T13C5.3		K06A1.2
	F26B1.8	F58E1.13	F48C1.1	F27C1.3	T17H7.7		K06A4.5
	F26C11.3	F58E1.9	F48C5.2	F27C8.5	T18H9.1		K06B9.2
	F26D10.9	F58G6.5	F48F7.5	F27E5.4	T19B10.1		K06C4.17
	F26D11.10	F58H1.5	F49E12.2	F28H7.9	T19B10.2		K06C4.9
	F26D2.13	F59A1.7	F49F1.5	F29D11.1	T19B10.5		K07C5.7
	F26D2.16	F59C12.1	F49H12.5	F29G9.6	T19C3.2		K07C6.3
	F26E4.5	F59C6.3	F49H12.6	F30H5.3	T19C9.8		K07C6.4
	F26F12.6	F59E12.5	F52E1.14	F31B12.3	T19D7.3		K07E8.5
	F26F2.6	F59F4.1	F52E1.7	F31E8.5	T20D3.2		K07H8.5
	F26G1.6	H02K04.1	F52E4.4	F31F4.7	T20D4.3		K08B12.1
	F26G1.7	H06H21.10	F52H2.3	F31F6.1	T21B4.7		K08C9.4
	F27C1.1	H06O01.1	F52H2.6	F32B5.1	T21C12.2		K08D8.4
	F27C1.11	H09F14.1	F53C3.12	F32B5.2	T21C9.11		K08E7.5
	F27E5.3	H11E01.3	F53E10.4	F32D8.1	T21D12.2		K08F8.5
	F28D1.3	H12I13.1	F53E10.5	F32H5.7	T23E1.1		K08H10.6
	F28D1.5	H14N18.2	F53H2.1	F33D11.5	T23H4.3		K09B11.10
	F28D1.8	H23N18.2	F54D11.1	F33D11.7	T24B8.5		K09B3.1
	F28E10.1	H23N18.5	F54D5.3	F33H1.5	T24C4.4		K09C6.7
	F28E10.4	H24K24.5	F54E4.4	F33H12.4	T24C4.7		K09D9.2
	F28G4.3	K01C8.10	F54F7.4	F34D10.6	T24C4.8		K09E10.2
	F28G4.5	K01G5.7	F54F7.8	F35A5.3	T24E12.5		K09F5.2
	F28H7.10	K02D3.1	F54H12.8	F35A5.4	T25C12.4		K09F6.5
	F28H7.11	K02F2.6	F54H5.4	F35A5.5	T25C8.2		K10C2.1
	F29C12.5	K02F6.6	F54H5.5	F35B12.4	T25E12.12		K10C8.2
	F29F11.5	K02G10.7	F55A12.9	F35C8.3	T26C12.6		K10D11.3
	F30A10.8	K03H1.9	F55B12.2	F35D11.2	T26E4.4		K10D11.6
	F30B5.8	K04F10.2	F55E10.6	F35D2.1	T27A10.6		K10G4.13
	F31D4.6	K05C4.1	F55F3.3	F35E12.2	T27B7.4		K10G6.2
	F31E3.2	K05C4.4	F55H2.2	F35E2.9	T27C10.4		K11E4.1
	F31E8.2	K05F1.10	F56A6.1	F35H10.3	T27C4.2		K11G9.3
	F31F4.18	K07D4.6	F56B6.2	F35H8.1	T27C5.8		M01E10.2
	F31F6.6	K07D8.1	F56C3.2	F36D3.5	T28B4.4		M02H5.4
	F31F7.1	K08A8.1	F56C3.9	F36D4.4	T28D6.2		M03B6.3
	F32A11.3	K08B4.4	F56E10.3	F36H1.3	VW02B12L.1		M03E7.4
	F32A11.7	K08C7.5	F56F10.1	F36H12.2	W01A11.4		M03F4.6
	F32A5.4	K08D12.5	F56F4.8	F36H5.10	W01F3.3		M03F8.1
	F32A6.5	K08E3.1	F56H1.2	F37A4.4	W02B8.6		M04C3.2
	F32B4.1	K08E7.3	F57B10.11	F37B1.3	W03B1.2		M110.9
	F32B4.2	K08F8.2	F57G8.5	F37E3.3	W04G3.1		M142.2
	F32B4.6	K08H2.5	F57H12.6	F37H8.4	W05B2.5		M151.2
	F32B5.3	K09A11.4	F58A4.1	F38B2.2	W06A11.3		M163.11
	F32B5.4	K09A9.1	F58B3.1	F38B6.1	W06B3.2		M195.1
	F32B5.7	K09D9.1	F58B4.5	F38B6.2	W08F4.6		M28.9
	F32D8.12	K09D9.12	F58E1.5	F38B6.3	W10G11.10		R01H2.5
	F32G8.6	K09E10.1	F58F9.4	F38E11.12	Y102A11A.3		R02D1.1
	F32H2.7	K09H9.3	F58F9.8	F38E11.4	Y102A5C.32		R02E4.1
	F32H2.9	K10D2.2	F58G1.4	F39D8.1	Y105E8A.13		R03H4.6
	F33A8.2	K10D2.6	F58G6.3	F39D8.4	Y116A8C.5		R04B3.1
	F33C8.2	K10G4.4	F58G6.7	F39G3.5	Y116F11B.2		R04B3.3
	F33D11.2	K10G6.5	F59A1.10	F39G3.6	Y11D7A.5		R04B5.3
	F33D4.3	K10H10.1	F59A1.8	F40E10.4	Y17D7B.1		R04D3.1
	F34D6.4	K11D12.3	F59B10.5	F40F12.3	Y17G7B.11		R05C11.1
	F35A5.2	K11D12.5	F59C6.6	F40F12.4	Y17G7B.8		R05D8.7
	F35B12.3	K11D9.1	F59D8.1	F40F9.1	Y18H1A.12		R05F9.12
	F35B12.6	K11G9.1	F59D8.2	F40G12.10	Y18H1A.13		R05F9.5
	F35C12.2	K11H12.5	F59E11.12	F40G12.4	Y22D7AR.9		R07A4.4
	F35C5.10	K12G11.4	F59F3.5	F40G12.6	Y22F5A.4		R07B1.5
	F35D2.4	M01D7.1	F59F4.4	F40H6.6	Y26D4A.3		R07E3.6
	F35D2.5	M01E10.3	F59F5.1	F41D3.2	Y2C2A.1		R08A2.5
	F35E2.6	M01E11.4	H03A11.2	F41D3.6	Y32F6B.3		R08B4.1
	F35G12.6	M01G12.12	H06H21.8	F41D9.3	Y32G9B.1		R08D7.7
	F35G8.1	M01G12.14	H12C20.3	F41D9.5	Y34B4A.10		R08E3.1
	F35H10.2	M01G12.9	H12D21.6	F41E6.11	Y34B4A.6		R09B5.7
	F36A2.11	M01H9.1	H12D21.7	F41E6.8	Y34B4A.9		R09D1.2
	F36F12.1	M02H5.10	H12D21.9	F41E7.1	Y34F4.4		R09H10.5
	F36F2.5	M02H5.3	H17B01.3	F41E7.3	Y37A1A.4		R102.1
	F36G9.9	M03A1.7	H20E11.3	F41G3.2	Y37A1B.13		R105.1
	F36H1.12	M04F3.3	H20J04.9	F41G3.3	Y37H2A.13		R10E9.3
	F36H1.9	M162.5	H22K11.1	F41G4.5	Y37H2A.14		R10H1.5
	F36H5.2	M28.2	H25P06.4	F41G4.7	Y38C1AA.6		R11A5.7
	F36H9.1	M60.2	H34I24.2	F42A10.7	Y38E10A.19		R11E3.1
	F37A4.5	M88.4	H41C03.3	F42D1.2	Y39A1A.9		R13A1.5
	F37A8.2	M88.6	K01B6.1	F42G9.8	Y39B6A.20		R13A5.4
	F37B4.13	PAR2.3	K01D12.12	F43C11.8	Y39D8C.1		R13H4.3
	F37C4.2	R01B10.5	K01D12.13	F43D9.1	Y39H10A.4		R148.7
	F37C4.8	R01E6.2	K01F9.2	F43G6.6	Y40C5A.3		R193.2
	F38A1.5	R01H10.4	K02B12.9	F43G9.6	Y41D4B.15		R57.2
	F38G1.1	R02D5.3	K02D7.3	F44A2.2	Y41D4B.16		T02B11.4
	F38H4.3	R02E4.3	K02D7.4	F44B9.1	Y41D4B.18		T02D1.5
	F39C12.4	R03D7.6	K02E11.5	F44B9.10	Y41E3.2		T02E9.2
	F40A3.7	R03H4.1	K02E7.1	F44D12.4	Y41G9A.5		T02G5.6
	F40E12.1	R05F9.6	K02G10.3	F44D12.5	Y43D4A.6		T03G6.1
	F40E12.2	R06C1.2	K04A8.1	F44G3.7	Y43F8B.14		T04B2.3
	F40E3.6	R06C7.3	K04A8.5	F44G4.5	Y43F8C.1		T04B2.7
	F40F8.8	R07A4.2	K04D7.3	F45B8.3	Y46C8AL.8		T04H1.8
	F41B4.2	R07C12.4	K04F1.7	F45E4.7	Y46D2A.1		T05F1.9
	F41B5.4	R07C3.10	K04F1.8	F45G2.1	Y46D2A.2		T06A4.3
	F41D3.1	R07E4.1	K04F1.9	F46A9.2	Y48G8AR.1		T06D8.10
	F41D3.11	R07H5.11	K04G11.3	F46B6.2	Y49G5A.1		T06E4.7
	F41E7.9	R08C7.12	K05G3.3	F46C5.3	Y50E8A.16		T07A5.3
	F41G3.10	R08E5.4	K06B4.8	F46F5.7	Y51A2D.13		T07A9.1
	F41G3.12	R08F11.1	K06B9.1	F46G11.1	Y51H4A.25		T07F10.4
	F41G3.4	R09E12.9	K07A1.10	F47B3.7	Y51H4A.7		T07G12.3
	F41G4.4	R09H10.4	K07B1.4	F47C10.3	Y52B11B.1		T08B1.1
	F42C5.2	R11.2	K07E3.7	F47C10.4	Y54E5A.1		T08B6.2
	F42D1.3	R11F4.3	K07E8.3	F47C10.8	Y54F10AM.6		T08D2.1
	F42F12.2	R12E2.14	K07H8.6	F47C12.1	Y54G2A.25		T08D2.2
	F42G2.2	R13D7.11	K08D8.1	F47C12.2	Y54G2A.37		T09A12.1
	F42G2.3	R13F6.6	K08D8.5	F47C12.4	Y54G2A.45		T09B4.7
	F42G2.7	R13H4.5	K08F4.7	F47D12.7	Y55B1AR.1		T09F5.10
	F43C11.5	R166.2	K08F8.3	F47E1.2	Y55F3AM.14		T10B5.10
	F43D2.4	T01A4.1	K08H10.9	F47F6.5	Y57E12AL.2		T10E9.4
	F43H9.4	T01B11.7	K09C8.4	F47G6.3	Y65B4BL.6		T12A7.9
	F44A2.4	T01H3.4	K09D9.13	F47H4.11	Y70C5C.6		T12B3.1
	F44D12.2	T03D8.4	K09H11.1	F48A11.1	Y71D11A.1		T13A10.10
	F44D12.8	T03D8.5	K10D11.1	F48A9.3	Y71G12B.17		T13C2.2
	F44F4.13	T03D8.6	K10D11.2	F48C11.1	Y71G12B.2		T13C5.7
	F44F4.5	T03F7.5	K10G4.3	F48E3.7	Y71G12B.5		T13H5.2
	F44G3.2	T03G11.8	K11D12.10	F48E3.8	Y73C8B.3		T14B1.2
	F45D11.1	T04A8.7	K11D12.13	F48F5.2	Y75B8A.28		T14B4.5
	F45E4.3	T04C10.3	K11D12.6	F49B2.3	Y75B8A.39		T14B4.6
	F45G2.2	T04C12.7	K11D12.7	F49B2.6	Y82E9BL.10		T14B4.7
	F45H11.6	T04F8.4	K11D12.8	F49C12.15	Y82E9BL.11		T15B7.16
	F46A8.8	T04H1.9	K11G12.1	F49C5.4	Y82E9BL.15		T16A9.5
	F46B3.17	T05A7.8	K11G9.2	F49E10.2	Y82E9BL.19		T16G1.2
	F46B3.7	T05B9.2	K11H12.7	F49E10.4	Y87G2A.2		T16G1.5
	F46B6.11	T05D4.4	K11H3.2	F49E12.7	Y94H6A.10		T16G1.6
	F46C5.7	T05E11.2	K12B6.3	F52A8.3	Y95B8A.1		T16G1.8
	F46F3.1	T05E11.3	K12C11.3	F52C6.13	ZC101.3		T16G12.1
	F47B10.8	T05E8.1	K12H4.7	F52D10.6	ZC13.4		T16G12.7
	F47B7.7	T06E4.5	LLC1.2	F52E1.4	ZC328.1		T16H12.6
	F47B8.12	T06E6.13	M02B1.1	F52E1.8	ZC434.3		T19A5.3
	F47B8.9	T07G12.2	M02D8.1	F52G3.3	ZC449.2		T19B10.9
	F47D12.1	T07H8.5	M02D8.5	F52G3.5	ZC455.10		T19D12.9
	F47E1.3	T08G3.7	M02H5.8	F53B1.7	ZC47.5		T20D4.5
	F47G4.5	T08G5.3	M03A8.1	F53B2.3	ZC513.2		T21C9.9
	F47H4.4	T09A12.3	M03B6.1	F53B2.5	ZK1025.3		T21F2.1
	F47H4.6	T09B9.2	M04B2.5	F53B3.3	ZK1025.9		T21G5.1
	F48C11.2	T09E11.10	M04C9.3	F53B6.6	ZK1053.1		T21H3.2
	F48G7.12	T10E10.5	M04C9.4	F53C3.3	ZK1240.6		T22B11.2
	F49A5.7	T10G3.4	M110.1	F53F1.7	ZK1290.10		T22B3.1
	F49A5.8	T11A5.1	M110.8	F53F4.4	ZK1290.3		T22B3.2
	F49D11.4	T11B7.4	M176.5	F54B11.7	ZK1290.8		T22B3.3
	F49E11.11	T11F8.3	M6.1	F54C8.1	ZK1320.4		T22F3.8
	F49E11.3	T11F9.11	M60.5	F54D5.15	ZK180.6		T23D5.6
	F49F1.11	T12A7.1	M7.12	F54E2.5	ZK381.2		T23F2.1
	F52C6.14	T12D8.5	M7.8	F54E4.2	ZK381.3		T23F6.5
	F52C6.5	T12G3.1	M7.9	F54F11.3	ZK455.7		T24C2.1
	F52D10.4	T13B5.7	M88.7	F54F2.1	ZK6.10		T25C12.3
	F52E1.2	T13C2.6	PDB1.1	F54G8.2	ZK6.11		T25C8.1
	F52E10.5	T13G4.5	R01H2.7	F54G8.5	ZK678.8		T25E12.13
	F52F12.1	T14D7.2	R03G8.3	F54H12.7	ZK829.3		T25G12.6
	F52F12.9	T14G10.5	R03G8.6	F55A4.7	ZK836.1		T26C5.2
	F52H3.6	T14G8.2	R03H10.7	F55C10.2	ZK84.1		T27C5.12
	F53A9.3	T16A1.7	R04B5.9	F55C12.6	ZK896.4		T28F2.7
	F53B1.3	T17A3.10	R04F11.5	F55C5.2	ZK896.5		T28F3.4
	F53B6.2	T19B10.3	R05A10.2	F55G1.13	ZK896.6		T28F3.8
	F53B6.4	T19C4.5	R05G6.5	F56C4.1	ZK899.6		T28H11.7
	F53B7.4	T19D12.4	R05H11.2	F56D5.3			W01A8.7
	F53B7.5	T19D12.6	R05H5.6	F56D6.13			W02G9.4
	F53C3.5	T19D2.1	R06B10.3	F56H6.12			W04G3.2
	F53F4.8	T19E7.2	R06B10.7	F56H9.6			W04G3.3
	F53G12.3	T19H12.1	R07B1.10	F57B9.6			W04G3.8
	F54C1.9	T19H12.5	R07B1.11	F57G8.4			W05B2.7
	F54D1.4	T20D4.6	R07B1.12	F57H12.4			W06B3.1
	F54D1.5	T20F10.1	R07B1.2	F58A6.10			W06D12.5
	F54D12.10	T21D11.1	R07B1.3	F58A6.6			W06G6.9
	F54D12.3	T21D9.1	R07B7.11	F58A6.8			W07A12.7
	F54D12.8	T21E8.2	R07B7.6	F58B3.8			W07A12.8
	F54D8.1	T21E8.3	R07B7.9	F58D5.7			W08G11.1
	F54E2.2	T22B2.2	R07C3.9	F58E1.2			W09C5.4
	F54E2.3	T22B2.5	R07E3.7	F58E1.6			W09G12.10
	F54G8.1	T22C8.7	R08E3.2	F58E6.11			Y102A5B.1
	F55A12.1	T22D1.2	R08E5.1	F58F6.1			Y102A5B.2
	F55B12.1	T22D1.9	R08E5.3	F58F9.6			Y102A5B.3
	F55D10.4	T22E5.7	R09D1.11	F58G1.3			Y105C5B.18
	F55F8.7	T22H2.5	R09E12.2	F58G1.9			Y105C5B.2
	F55H12.1	T23C6.3	R102.4	F58G4.1			Y105C5B.6
	F55H12.6	T23F4.4	R10D12.9	F58G6.4			Y11D7A.14
	F56A11.6	T23F6.1	R10H10.3	F58H1.2			Y11D7A.9
	F56F11.5	T23H4.1	R11D1.11	F58H7.1			Y17G7B.14
	F56H11.1	T24A11.3	R11E3.5	F59A1.11			Y18D10A.18
	F56H6.11	T24A6.7	R11G1.3	F59A6.3			Y18H1A.9
	F56H6.2	T24C4.3	R11H6.1	F59A7.1			Y22F5A.5
	F56H6.5	T24D11.1	R12A1.4	F59B1.4			Y26D4A.4
	F57A10.6	T24D8.4	R12C12.1	F59B1.7			Y32B12A.3
	F57A8.6	T24H10.7	R12C12.9	F59H6.2			Y32F6A.5
	F57A8.7	T25B6.6	R12E2.4	H02I12.3			Y32F6B.2
	F57C7.4	T25G3.2	R12H7.2	H03E18.2			Y32G9A.6
	F57G4.1	T26E3.8	R144.1	H06I04.5			Y37E11AL.1
	F57H12.5	T26H2.3	R173.1	H08M01.1			Y37E11B.10
	F58B3.2	T27A1.7	R52.7	H11L12.1			Y37F4.1
	F58D12.3	T27B1.2	R57.1	H12D21.11			Y38A10A.2
	F58D2.2	T27D1.3	T01G6.4	H22K11.3			Y38E10A.5
	F58E6.10	T27E7.6	T01G6.7	H23L24.3			Y38F1A.3
	F58E6.3	T27F2.4	T01H8.2	H23N18.1			Y39B6A.1
	F58E6.5	T27F6.8	T02C12.1	H23N18.3			Y39B6A.23
	F58E6.7	T28A11.13	T02E1.1	H27M09.5			Y39B6A.24
	F58G11.4	T28A11.15	T02E1.5	H32C10.1			Y39D8A.1
	F58G4.2	T28B11.1	T02E1.6	H32C10.3			Y39E4B.4
	F58G4.6	T28C12.4	T02G5.3	JC8.11			Y40D12A.2
	F58G6.6	T28D9.9	T02G6.1	K01A12.3			Y41D4B.17
	F58G6.8	W01C9.5	T02H6.6	K01A6.4			Y41E3.19
	F58H7.3	W02B3.3	T03E6.5	K01D12.2			Y42A5A.2
	F59B10.3	W02B3.6	T03E6.7	K01D12.3			Y42H9B.1
	F59B2.12	W02B8.4	T03F1.10	K01D12.4			Y43E12A.3
	F59C6.2	W02D9.10	T03F7.7	K01D12.5			Y43F8A.2
	F59D12.4	W02F12.2	T03G11.2	K02B7.4			Y43F8C.5
	F59D6.3	W03D8.2	T04A8.5	K02D7.5			Y44A6B.3
	F59F3.2	W03D8.6	T04C10.4	K02E10.7			Y45F10D.14
	H05L14.1	W03F9.4	T04F3.2	K02E2.1			Y46C8AL.2
	H06H21.9	W03G9.5	T04F3.4	K02E2.2			Y46C8AL.4
	H10E21.2	W04D2.1	T04F8.9	K02E2.8			Y46C8AL.5
	H20J04.1	W04E12.2	T05A7.5	K02G10.5			Y46G5A.22
	H23L24.1	W05B5.3	T05C3.6	K03A11.3			Y46G5A.29
	H24O09.1	W05G11.4	T05E7.1	K03A11.4			Y47D3A.10
	H27M09.4	W06A11.1	T05G5.6	K03H1.1			Y47D3B.1
	H35N09.1	W06D12.1	T05H4.15	K03H1.12			Y47D7A.13
	H38K22.6	W06D4.4	T05H4.5	K03H4.1			Y47D7A.5
	H41C03.2	W06F12.3	T06A1.5	K03H9.3			Y47H9C.1
	K01A11.4	W08E12.2	T06E6.3	K04C2.7			Y50D4B.3
	K01A6.6	W08E12.3	T06E8.1	K04C2.8			Y50D4B.4
	K01D12.14	W09G10.6	T06G6.7	K04F1.10			Y53C10A.3
	K01H12.2	Y102A11A.2	T07A5.4	K04F1.12			Y53F4B.25
	K01H12.3	Y102A11A.9	T07A9.12	K04H4.2			Y53F4B.27
	K02A6.2	Y104H12A.1	T07F10.1	K05F1.1			Y53G8AR.7
	K02B12.4	Y105E8A.12	T07H3.6	K05F1.3			Y54F10BM.11
	K02E11.2	Y106G6E.1	T08A9.12	K05F6.9			Y54G2A.21
	K02E11.6	Y110A2AL.8	T08A9.8	K06A9.1			Y55F3AM.2
	K02E7.10	Y110A7A.14	T08B6.5	K06B9.4			Y57A10A.24
	K02F2.2	Y111B2A.27	T08E11.3	K07C6.11			Y57G11A.2
	K02F3.3	Y113G7B.3	T09A5.6	K07C6.5			Y57G11C.41
	K03B4.6	Y119C1B.11	T09B4.4	K07E12.1			Y57G11C.42
	K03B8.5	Y119D3A.1	T09B4.8	K07E8.11			Y57G7A.6
	K04A8.10	Y119D3A.2	T09B9.5	K07G5.4			Y65B4BL.1
	K04D7.6	Y119D3B.7	T09E8.4	K08B4.5			Y65B4BR.2
	K04E7.2	Y11D7A.8	T09F5.11	K08C9.1			Y65B4BR.6
	K04F1.3	Y17D7B.2	T10B10.8	K08D10.10			Y67A10A.1
	K05D4.4	Y17D7B.3	T10B9.7	K08D10.9			Y67A10A.11
	K05D4.6	Y17G7B.23	T10C6.10	K08E4.5			Y67A10A.8
	K05D4.9	Y17G7B.5	T10D4.4	K08E5.2			Y69A2AR.15
	K05F1.6	Y17G9B.7	T10E9.3	K09B11.4			Y69E1A.1
	K05F1.7	Y18D10A.23	T10E9.8	K09F6.4			Y70D2A.1
	K06A1.1	Y18D10A.4	T10G3.3	K10B3.8			Y71A12B.13
	K06A4.2	Y1H11.2	T11F8.1	K10B3.9			Y71G12B.25
	K06A5.2	Y22D7AL.14	T11F9.3	K10C2.5			Y71G12B.32
	K06B4.1	Y22D7AR.7	T11F9.5	K10C9.8			Y71H2AM.22
	K06C4.6	Y22D7AR.8	T11F9.6	K10D6.1			Y73B6BL.26
	K06H7.8	Y22F5A.6	T12B5.1	K10F12.7			Y73B6BL.31
	K07A1.4	Y25C1A.10	T12B5.10	K10H10.4			Y73E7A.8
	K07A3.3	Y2H9A.3	T12B5.2	K11C4.1			Y75B8A.21
	K07E12.2	Y37A1B.7	T12B5.8	K11E4.3			Y75B8A.3
	K07E8.1	Y37E3.16	T12C9.1	K11G9.4			Y82E9BL.4
	K07F5.11	Y38A8.2	T13B5.6	K12B6.8			Y87G2A.15
	K07F5.4	Y38C9B.1	T13B5.9	K12D9.1			Y94H6A.2
	K07G5.3	Y38F1A.8	T13F3.6	K12G11.1			ZC123.1
	K08C7.4	Y38H6C.11	T13H10.2	M01A12.3			ZC13.3
	K08C9.2	Y38H6C.24	T14G12.2	M01A12.4			ZC155.2
	K08F4.11	Y38H6C.5	T14G12.3	M01B2.2			ZC250.3
	K08F4.4	Y38H6C.8	T15B7.1	M01B2.6			ZC317.3
	K08F4.6	Y38H6C.9	T15B7.3	M01G12.7			ZC328.2
	K08F4.8	Y38H8A.1	T17A3.8	M01H9.2			ZC374.2
	K08F8.1	Y39A1A.16	T18H9.2	M02D8.7			ZC416.6
	K09A11.2	Y39A3A.4	T19C4.8	M02F4.1			ZC443.6
	K09C6.9	Y39A3B.1	T20B3.13	M02G9.1			ZC449.1
	K09C8.5	Y39B6A.27	T21B4.12	M02G9.2			ZC477.7
	K09C8.8	Y39D8B.3	T21B6.2	M02G9.3			ZC504.2
	K09E2.2	Y40B10A.2	T21C9.6	M03D4.4			ZC513.3
	K09E4.1	Y42G9A.4	T21C9.7	M04C9.1			ZC581.6
	K09E4.4	Y42H9AR.2	T21C9.8	M04C9.5			ZC581.7
	K09F6.3	Y43B11AR.3	T21G5.2	M04G7.1			ZK1025.7
	K09F6.6	Y45G5AM.6	T21G5.6	M05B5.6			ZK1055.4
	K09H11.6	Y46H3A.2	T21H3.1	M110.2			ZK112.6
	K10C9.7	Y46H3D.6	T22B7.1	M151.4			ZK1193.2
	K10D3.1	Y47D3A.2	T22B7.7	M153.5			ZK1193.3
	K10F12.3	Y47D9A.1	T22C1.5	M162.11			ZK1193.4
	K11D12.1	Y47H10A.5	T22C8.1	M162.8			ZK1225.1
	K11D2.2	Y48G8AL.12	T22D1.11	M176.1			ZK1248.5
	K11G12.2	Y49E10.1	T22E7.1	M18.1			ZK1290.12
	M01B2.1	Y49E10.25	T22F7.4	M195.2			ZK154.1
	M01B2.8	Y49F6A.1	T22G5.5	M28.6			ZK180.5
	M01D1.2	Y4C6A.3	T22G5.6	M6.4			ZK228.4
	M01F1.7	Y50D4B.2	T22H6.2	M7.7			ZK265.5
	M02B1.4	Y51A2D.12	T23F4.2	M70.1			ZK354.8
	M02B7.6	Y51B9A.8	T25B9.1	M70.3			ZK377.1
	M02D8.4	Y51H4A.12	T25D10.1	M88.3			ZK418.7
	M03B6.2	Y52B11A.7	T25E12.11	R01E6.4			ZK507.4
	M03F8.4	Y53G8AR.1	T26C5.1	R01H2.2			ZK596.3
	M03F8.5	Y54G2A.4	T27A10.3	R02C2.7			ZK616.10
	M05B5.1	Y54G2A.41	T27A3.1	R02D3.1			ZK617.2
	M151.1	Y55B1AR.3	T27B7.3	R02F11.1			ZK622.2
	M153.4	Y55B1AR.4	T27E9.8	R03C1.1			ZK643.1
	M163.5	Y55F3AM.10	T28A11.21	R03G5.1			ZK643.8
	M163.8	Y57A10C.7	T28D6.7	R04B5.7			ZK673.9
	M176.10	Y57E12B.4	T28H10.2	R05G6.9			ZK678.5
	M195.3	Y57G11A.5	T28H10.3	R06A4.10			ZK688.1
	M6.3	Y58A7A.3	VZC374L.1	R06C7.10			ZK757.3
	R02E12.6	Y58A7A.4	VZK822L.2	R07B1.8			ZK822.3
	R02E12.8	Y58A7A.5	W01A8.6	R07B1.9			ZK822.5
	R02F2.8	Y59A8B.20	W01C8.5	R07B7.12			ZK84.2
	R03A10.6	Y60C6A.1	W02B12.1	R07C3.12			ZK856.14
	R03D7.1	Y62F5A.10	W02B12.4	R07D5.1			ZK856.4
	R03G5.3	Y65B4BL.5	W02D7.5	R07E5.15			ZK863.9
	R05D8.10	Y66A7A.6	W02H3.1	R07E5.17			ZK896.1
	R06A10.3	Y67A6A.2	W03A5.2	R07E5.6			ZK899.4
	R06B10.1	Y67D8C.1	W03D8.11	R07G3.2			ZK938.1
	R06F6.7	Y69H2.12	W03F9.11	R08A2.2			ZK938.3
	R07C3.1	Y6E2A.7	W04E12.6	R08H2.1
	R07C3.3	Y70C5C.2	W04E12.8	R09A8.4
	R07E3.3	Y71F9AL.17	W05B2.6	R09B5.11
	R08F11.7	Y71F9AR.1	W05E10.5	R09D1.4
	R09D1.3	Y71G12A.4	W06B11.4	R09D1.5
	R106.2	Y71G12B.22	W06D4.1	R09E10.1
	R10D12.11	Y71G12B.3	W06D4.3	R09E10.2
	R10E4.7	Y71H2AR.2	W07G1.3	R09E10.3
	R10E9.2	Y73B6BL.28	W08D2.1	R09E10.5
	R10F2.5	Y73B6BL.4	W08E12.1	R09E10.6
	R11A8.8	Y73C8A.1	Y102A11A.1	R102.3
	R11D1.3	Y73C8B.4	Y102A11A.5	R102.7
	R11F4.2	Y73C8C.10	Y102E9.5	R102.8
	R11G10.1	Y74E4A.1	Y105C5B.14	R106.1
	R11G11.12	Y75B8A.20	Y105C5B.15	R10D12.1
	R11G11.14	Y75B8A.33	Y105E8B.5	R10D12.6
	R12C12.3	Y80D3A.5	Y106G6H.1	R10F2.1
	R12E2.6	Y80D3A.7	Y110A7A.11	R10H1.2
	R13A5.9	Y80D3A.8	Y110A7A.3	R11A8.6
	R13D11.6	Y81G3A.4	Y113G7B.14	R11G10.2
	R13D7.2	Y82E9BL.12	Y116A8C.19	R11G10.3
	R13D7.7	Y82E9BL.2	Y116A8C.20	R12A1.3
	R13F6.8	Y82E9BR.20	Y116F11B.6	R12C12.8
	R13H7.2	Y82E9BR.8	Y119C1B.9	R12E2.10
	R13H9.4	Y87G2A.11	Y119D3B.13	R12G8.1
	R148.1	Y8A9A.3	Y17D7C.6	R12H7.4
	R151.1	Y97E10AR.8	Y17G7B.19	R134.1
	R155.3	ZC132.9	Y17G9A.4	R134.2
	R155.4	ZC239.12	Y18D10A.2	R13A1.4
	R155.5	ZC317.2	Y18D10A.6	R13D11.3
	R52.3	ZC410.1	Y20C6A.1	R13H4.7
	R52.6	ZC443.5	Y22D7AL.9	R13H4.8
	T01B11.4	ZC449.3	Y22D7AR.13	R186.5
	T01B4.1	ZC455.6	Y23H5B.8	R74.2
	T01B6.4	ZC47.13	Y24D9A.5	SSSD1.1
	T01D1.6	ZC47.14	Y26D4A.21	T01B11.1
	T01G5.1	ZC47.4	Y32B12C.1	T01B7.8
	T01G5.2	ZC513.1	Y32F6A.4	T01C2.1
	T02B11.3	ZK1037.13	Y32G9A.13	T01C3.5
	T02B11.7	ZK105.4	Y34B4A.5	T01C4.1
	T02D1.4	ZK1055.6	Y34F4.5	T01D3.2
	T02D1.6	ZK1055.7	Y37A1A.3	T01G5.5
	T02E9.6	ZK1058.6	Y38F2AL.3	T01G9.3
	T02G5.13	ZK1067.8	Y38H6C.1	T01H10.1
	T02G5.2	ZK112.4	Y38H6C.16	T01H10.2
	T04A11.12	ZK112.7	Y39A3B.3	T02C12.4
	T04A11.7	ZK1320.5	Y39B6A.19	T02E1.7
	T04A8.3	ZK154.6	Y39C12A.8	T02G5.11
	T04D3.3	ZK546.11	Y39E4B.9	T02G6.2
	T04H1.1	ZK563.1	Y39G8B.7	T02G6.7
	T04H1.3	ZK596.1	Y39H10A.5	T03F1.5
	T05A1.3	ZK637.3	Y39H10B.2	T04A6.4
	T05A10.6	ZK697.10	Y40C7B.4	T04G9.2
	T05A7.11	ZK697.6	Y40H7A.10	T05A1.1
	T05A8.5	ZK783.1	Y43C5A.2	T05A1.5
	T05B4.11	ZK813.4	Y43F4A.4	T05A10.4
	T05B4.4	ZK813.5	Y43F8B.12	T05A7.6
	T05C12.3	ZK829.10	Y43F8C.13	T05A7.7
	T05C3.2	ZK84.7	Y43F8C.17	T05A8.7
	T05C3.4		Y45F10B.14	T05B4.1
	T05D4.5		Y45G12C.2	T05B4.3
	T05F1.5		Y47D3A.12	T05C12.1
	T05F1.7		Y47G6A.30	T05C12.4
	T05F1.8		Y48A6B.7	T05H4.7
	T05H4.3		Y48A6B.9	T06A10.2
	T05H4.4		Y48E1B.15	T06A4.1
	T06A1.1		Y48G1BR.1	T06C10.3
	T06C12.8		Y49E10.16	T06D4.4
	T06E4.11		Y49E10.18	T06D8.1
	T06G6.3		Y4C6B.6	T06D8.3
	T07C12.9		Y51A2D.8	T06E4.10
	T07D10.1		Y51F10.7	T06E4.8
	T07D10.2		Y51H4A.5	T06E4.9
	T07D10.3		Y51H7BM.1	T06E6.15
	T07H6.5		Y52E8A.4	T06H11.1
	T08B1.2		Y53C10A.5	T07C12.8
	T08B6.4		Y53F4B.2	T07C5.3
	T08G11.5		Y53F4B.29	T07D1.5
	T09B9.3		Y53F4B.30	T07H6.1
	T09D3.4		Y53F4B.31	T08B2.2
	T09E11.4		Y53G8B.1	T08B6.6
	T09E11.5		Y53H1B.4	T08D2.4
	T09E11.7		Y54E5A.2	T08D2.6
	T10B10.4		Y54F10BM.10	T08D2.7
	T10B10.6		Y54G2A.14	T09D3.1
	T10B9.1		Y54G2A.3	T09F3.3
	T10B9.10		Y54G2A.33	T09H2.1
	T10E10.4		Y54G2A.49	T10B5.8
	T10E9.6		Y54G2A.6	T10B9.4
	T11F9.1		Y54G2A.9	T10E10.3
	T11G6.3		Y54G9A.4	T10E9.5
	T12A2.5		Y55F3BR.5	T10E9.9
	T13A10.11		Y55H10A.1	T10G3.2
	T13A10.5		Y57A10A.14	T10H4.2
	T13C5.4		Y57A10A.23	T10H4.8
	T13F2.11		Y57A10B.6	T11F8.4
	T13F2.12		Y57E12B.3	T12A7.2
	T13G4.6		Y57G11C.40	T12B3.2
	T14B1.1		Y59A8B.24	T13F3.1
	T14D7.3		Y59H11AR.4	T13H5.3
	T14E8.2		Y5H2B.3	T14B4.9
	T14E8.3		Y60A3A.16	T14C1.1
	T15D6.10		Y60A3A.24	T14E8.4
	T15D6.12		Y60A3A.25	T15B12.2
	T15D6.5		Y61B8A.4	T16G1.1
	T15D6.7		Y62E10A.19	T16G12.3
	T16A1.1		Y62H9A.4	T17A3.1
	T16D1.2		Y64H9A.2	T17H7.1
	T16G1.7		Y66H1A.6	T18D3.4
	T17H7.4		Y66H1B.4	T19C3.6
	T18D3.2		Y67D8B.1	T19D12.5
	T19C4.1		Y69A2AL.2	T19D7.7
	T19D12.7		Y69A2AR.5	T19H12.10
	T19H12.3		Y69F12A.2	T19H12.11
	T20B12.9		Y69H2.9	T19H12.6
	T20B6.2		Y71G12B.6	T19H5.1
	T20C7.2		Y71H10B.1	T20D4.16
	T20D4.10		Y71H2AM.13	T20D4.9
	T20D4.12		Y71H2AM.14	T20F5.4
	T20D4.15		Y71H2B.7	T20G5.6
	T20D4.8		Y73B6BL.13	T20H9.3
	T20F7.7		Y73B6BL.14	T21B10.6
	T20G5.5		Y73B6BL.24	T21B6.3
	T20H9.6		Y73B6BL.25	T21D12.7
	T21B4.4		Y73C8C.8	T21E8.1
	T21B4.5		Y73F4A.1	T21E8.7
	T21C12.1		Y75B8A.4	T21H8.3
	T21G5.4		Y7A5A.1	T21H8.4
	T22B7.3		Y7A5A.9	T22A3.4
	T22C1.8		Y80D3A.9	T22B11.3
	T22D1.12		Y82E9BL.14	T22B11.4
	T22E7.2		Y82E9BL.8	T22B2.6
	T22F3.11		Y82E9BR.13	T22F7.3
	T22F3.7		Y82E9BR.4	T22F7.5
	T22G5.1		Y9C2UA.2	T22H9.3
	T22G5.4		Y9C9A.16	T23B3.3
	T22H2.3		Y9C9A.8	T23B3.4
	T22H6.7		ZC155.4	T23D5.2
	T22H9.4		ZC190.1	T23F1.5
	T23B3.5		ZC196.1	T23F1.6
	T23B7.2		ZC196.5	T23F6.2
	T23D5.7		ZC239.14	T23G4.4
	T23D8.2		ZC239.16	T23G5.5
	T23F11.2		ZC317.1	T23H2.4
	T23F4.3		ZC328.3	T24A6.4
	T23G11.10		ZC328.5	T24A6.8
	T23H2.2		ZC376.4	T24D5.5
	T24A6.11		ZC404.12	T24E12.3
	T24A6.19		ZC455.4	T25B2.3
	T24E12.10		ZC477.10	T25B6.3
	T24E12.9		ZK1037.6	T25B6.5
	T24F1.6		ZK1127.10	T25B9.6
	T25B6.2		ZK1236.5	T25E4.1
	T25B9.4		ZK1240.10	T26A8.2
	T25B9.5		ZK1240.9	T26C12.4
	T25E12.10		ZK1248.11	T26E4.12
	T25E12.4		ZK1290.1	T27A3.5
	T26E4.3		ZK1290.14	T27F6.1
	T26H2.8		ZK1290.5	T28A11.17
	T27A10.2		ZK1307.1	T28A11.20
	T27A10.5		ZK1320.1	T28B4.2
	T27A3.3		ZK1320.2	T28C12.2
	T27A3.4		ZK1320.3	T28C12.3
	T27E4.6		ZK177.10	T28D9.11
	T27E7.1		ZK177.3	T28F3.5
	T27E7.3		ZK185.3	T28F4.1
	T27E9.9		ZK228.3	T28F4.2
	T28A11.10		ZK337.5	T28H11.1
	T28A11.18		ZK353.6	T28H11.5
	T28A8.1		ZK370.7	T28H11.8
	T28B8.3		ZK512.7	VY35H6BL.1
	T28B8.5		ZK520.2	W01B6.2
	T28C12.1		ZK525.2	W01C8.6
	T28C6.5		ZK6.6	W01C9.4
	T28D6.3		ZK6.7	W02A2.3
	T28F2.3		ZK622.5	W02B12.12
	T28F3.9		ZK816.5	W02B8.3
	T28H11.2		ZK856.5	W02C12.1
	W01B6.5		ZK863.1	W02F12.7
	W01C9.3		ZK896.7	W02H5.7
	W01D2.3		ZK899.2	W03B1.8
	W01H2.3		ZK930.3	W03D8.9
	W02D7.10		ZK973.5	W03F11.2
	W02D7.12		ZK994.3	W03F11.4
	W03C9.8			W03G1.1
	W03D2.1			W03G1.5
	W03D8.1			W03H1.2
	W03D8.7			W04C9.6
	W03D8.8			W04G3.10
	W03F8.1			W04G5.2
	W03G1.7			W04G5.4
	W03G9.7			W04G5.9
	W04C9.3			W05B2.2
	W04E12.1			W05B2.4
	W04G3.7			W05B5.2
	W04G5.5			W06D11.4
	W04G5.6			W06D4.2
	W04G5.8			W06H8.2
	W05E10.2			W06H8.8
	W05F2.7			W07B8.5
	W05G11.6			W07G1.1
	W05H12.1			W07G4.6
	W05H5.3			W08E12.6
	W06D12.3			W08F4.2
	W07B8.3			W08F4.9
	W07E11.2			W09C3.6
	W07E6.3			W09D6.4
	W07G1.7			W10C4.1
	W08D2.3			W10C8.4
	W08D2.8			W10C8.5
	W08F4.7			Y104H12BR.1
	W09C3.8			Y105C5A.8
	W10C8.1			Y105E8A.7
	W10G11.16			Y105E8B.9
	W10G11.17			Y106G6A.4
	Y105C5B.25			Y106G6H.13
	Y105C5B.4			Y10G11A.3
	Y105E8A.32			Y110A2AL.2
	Y105E8A.5			Y113G7B.15
	Y106G6G.3			Y113G7C.1
	Y106G6G.6			Y116A8A.8
	Y113G7A.12			Y116A8B.1
	Y113G7A.16			Y116A8C.14
	Y113G7A.5			Y116A8C.23
	Y116A8A.6			Y116A8C.4
	Y119C1B.5			Y116A8C.40
	Y17D7A.4			Y116F11A.3
	Y17D7C.2			Y116F11B.1
	Y17G9A.1			Y119C1B.1
	Y17G9A.5			Y119D3A.3
	Y18D10A.8			Y119D3A.4
	Y18H1A.10			Y13C8A.1
	Y18H1A.15			Y17G7B.22
	Y19D10B.3			Y18D10A.7
	Y1A5A.1			Y18H1A.1
	Y1B5A.1			Y22D7AR.12
	Y1H11.1			Y25C1A.1
	Y22D7AL.16			Y25C1A.11
	Y22D7AR.14			Y32B12B.3
	Y24D9B.1			Y32F6A.2
	Y27F2A.5			Y32F6A.6
	Y32G9A.4			Y34F4.3
	Y37A1B.10			Y35H6.3
	Y37A1B.12			Y37E11AR.7
	Y37A1B.5			Y37H9A.2
	Y37D8A.12			Y38C1AB.8
	Y37D8A.5			Y38C1BA.3
	Y37E11AL.4			Y38E10A.7
	Y37E3.13			Y38H8A.3
	Y37F4.5			Y39A1B.2
	Y37F4.8			Y39A3A.2
	Y37H2C.1			Y39B6A.25
	Y38C1AA.7			Y39B6A.31
	Y38C1AA.9			Y39C12A.7
	Y38E10A.17			Y39F10C.1
	Y38E10A.9			Y39G8B.5
	Y38F1A.7			Y40B10A.5
	Y38F2AL.5			Y40B10B.1
	Y38H6A.3			Y40C5A.2
	Y38H6C.17			Y40H7A.4
	Y38H6C.19			Y40H7A.8
	Y38H6C.3			Y41C4A.1
	Y39A1A.18			Y41C4A.7
	Y39B6A.29			Y41D4A.1
	Y39B6A.30			Y41G9A.2
	Y39B6A.8			Y42A5A.4
	Y39C12A.6			Y43D4A.5
	Y39E4B.8			Y43E12A.1
	Y39G10AR.16			Y43F8B.19
	Y39G8C.4			Y44A6B.2
	Y40H4A.1			Y44A6D.5
	Y40H4A.2			Y45F10A.2
	Y40H7A.5			Y46C8AL.1
	Y41D4B.24			Y46C8AR.3
	Y41D4B.6			Y46G5A.30
	Y41E3.14			Y46H3A.1
	Y41E3.3			Y46H3A.5
	Y41G9A.4			Y46H3D.7
	Y42A5A.1			Y47D3B.6
	Y42G9A.3			Y47D7A.15
	Y43C5B.3			Y48B6A.4
	Y43F8C.16			Y48B6A.5
	Y43F8C.4			Y48B6A.7
	Y44A6D.4			Y48C3A.11
	Y44A6D.6			Y48G1C.5
	Y45F10B.10			Y49C4A.9
	Y46C8AL.9			Y4C6A.1
	Y46C8AR.1			Y4C6A.2
	Y46H3D.4			Y50E8A.10
	Y47D3A.11			Y50E8A.6
	Y47D7A.12			Y50E8A.9
	Y47G7B.1			Y51A2D.5
	Y47H9C.6			Y51B9A.6
	Y48B6A.8			Y51H7BR.4
	Y48D7A.2			Y53C10A.2
	Y48E1B.13			Y53C12C.1
	Y48G8AR.2			Y53F4B.19
	Y48G9A.6			Y53F4B.28
	Y49A10A.1			Y53G8AM.7
	Y49E10.10			Y53H1B.1
	Y49E10.9			Y54E10BL.2
	Y49F6B.8			Y54E10BR.7
	Y49F6C.5			Y54E2A.1
	Y4C6B.3			Y54F10BL.1
	Y4C6B.4			Y54F10BM.4
	Y50C1A.2			Y54G11A.13
	Y50D4B.1			Y55B1BR.1
	Y50D4C.2			Y55H10A.2
	Y51B9A.7			Y56A3A.14
	Y52B11A.1			Y57E12AL.4
	Y53C10A.9			Y57G11B.97
	Y53C12A.8			Y57G11C.18
	Y54E2A.5			Y57G11C.32
	Y54E2A.9			Y57G11C.6
	Y54F10AM.2			Y59E9AL.6
	Y54G11A.7			Y59H11AL.1
	Y54G2A.13			Y5H2B.7
	Y54G2A.20			Y61B8B.1
	Y54G2A.36			Y62E10A.14
	Y54G2A.46			Y62H9A.1
	Y54G9A.10			Y62H9A.10
	Y55F3C.2			Y63D3A.10
	Y57A10A.35			Y65B4BR.1
	Y57A10C.3			Y69A2AL.1
	Y57G11C.20			Y69A2AR.14
	Y57G11C.47			Y69A2AR.19
	Y57G11C.50			Y69A2AR.9
	Y57G7A.3			Y69E1A.2
	Y57G7A.9			Y6B3B.1
	Y58A7A.6			Y6B3B.10
	Y58G8A.1			Y70C5C.1
	Y59A8B.3			Y70D2A.2
	Y62H9A.14			Y71F9AL.2
	Y64G10A.6			Y71H2AM.15
	Y66D12A.13			Y73B3A.12
	Y67D8B.2			Y73B3A.13
	Y69A2AR.23			Y73B3A.3
	Y69E1A.6			Y73B3A.9
	Y69H2.11			Y73B6BL.12
	Y6B3B.11			Y73B6BL.22
	Y6G8.1			Y73B6BL.23
	Y70G10A.2			Y73B6BL.37
	Y70G10A.3			Y73B6BL.38
	Y71D11A.5			Y73B6BL.39
	Y71G12B.26			Y73F8A.2
	Y71G12B.33			Y73F8A.20
	Y71G12B.4			Y73F8A.35
	Y73B3A.11			Y73F8A.5
	Y73B3A.18			Y75B7AL.1
	Y73B3A.22			Y75B7AR.1
	Y73B3B.1			Y75D11A.3
	Y73B6A.1			Y7A9A.1
	Y73B6A.6			Y8A9A.6
	Y73B6BL.10			Y94H6A.1
	Y73B6BL.19			Y97E10B.10
	Y73B6BL.42			Y97E10B.7
	Y73C8C.4			Y9C9A.3
	Y73E7A.4			ZC101.2
	Y73F8A.31			ZC116.3
	Y75B8A.12			ZC13.10
	Y76B12C.1			ZC142.1
	Y79H2A.4			ZC15.1
	Y81G3A.5			ZC15.5
	Y82E9BL.3			ZC190.5
	Y82E9BR.12			ZC190.7
	Y87G2A.16			ZC21.6
	Y8A9A.2			ZC239.5
	Y9C2UA.1			ZC239.7
	ZC116.1			ZC247.2
	ZC132.7			ZC250.5
	ZC168.6			ZC334.1
	ZC190.6			ZC334.2
	ZC196.7			ZC404.5
	ZC204.6			ZC412.2
	ZC21.3			ZC412.5
	ZC239.15			ZC443.1
	ZC334.7			ZC449.5
	ZC395.4			ZC455.1
	ZC404.11			ZC504.5
	ZC404.13			ZC513.11
	ZC416.8			ZC518.4
	ZC482.2			ZC53.6
	ZC482.4			ZC64.4
	ZC506.4			ZC84.1
	ZC84.4			ZC84.2
	ZK1037.1			ZC84.6
	ZK105.3			ZK1010.5
	ZK1053.3			ZK1010.7
	ZK1053.6			ZK1010.9
	ZK1055.2			ZK1037.5
	ZK112.1			ZK105.6
	ZK1248.1			ZK1053.2
	ZK1248.2			ZK1055.5
	ZK1248.20			ZK1067.5
	ZK1248.6			ZK1067.7
	ZK1251.6			ZK1127.2
	ZK1251.8			ZK1225.4
	ZK1290.9			ZK1240.8
	ZK1307.4			ZK1290.2
	ZK218.5			ZK1290.6
	ZK265.4			ZK1307.3
	ZK328.6			ZK1307.7
	ZK328.7			ZK180.1
	ZK328.8			ZK20.1
	ZK370.6			ZK228.5
	ZK39.2			ZK250.7
	ZK512.6			ZK262.2
	ZK546.6			ZK262.3
	ZK593.3			ZK265.8
	ZK596.2			ZK265.9
	ZK6.4			ZK287.1
	ZK617.1			ZK354.2
	ZK622.1			ZK380.1
	ZK652.5			ZK418.2
	ZK666.6			ZK430.3
	ZK666.7			ZK455.2
	ZK673.7			ZK455.3
	ZK682.4			ZK455.4
	ZK688.12			ZK484.7
	ZK721.4			ZK507.1
	ZK742.4			ZK54.3
	ZK783.6			ZK546.3
	ZK84.6			ZK550.5
	ZK849.2			ZK563.2
	ZK863.8			ZK593.9
	ZK867.1			ZK616.9
	ZK938.4			ZK637.1
	ZK970.5			ZK662.2
				ZK673.6
				ZK682.5
				ZK697.11
				ZK770.1
				ZK792.4
				ZK795.2
				ZK809.1
				ZK813.6
				ZK816.4
				ZK829.1
				ZK829.2
				ZK829.8
				ZK849.1
				ZK849.4
				ZK858.2
				ZK892.3
				ZK892.4
				ZK896.8
				ZK930.7
				ZK945.6
				ZK945.7
				ZK945.8
				ZK945.9
				ZK970.6
				ZK993.1

## Sheet: TableS10B
Genes up-regulated by infection with all three bacterial pathogens (RNA-seq)
Gene sequence name	Gene WB ID	Gene Public Name	Gene Description (Concise)	CDS Description
AH10.1	WBGene00007082	acs-10		4-coumarate:coenzyme A ligase
AH10.3	WBGene00007084	AH10.3
AH6.10	WBGene00005032	sra-6	sra-6 encodes a seven-transmembrane chemosensory receptor; an sra-6::GFP fusion reporter is expressed in the ASH (strongly) and ASI (weakly) amphid sensory neurons, the PVQ interneurons, and in the SPD and SPV male spicule neurons; sra-6 expression in the ASH neurons is positively regulated by KIN-29, a serine/threonine kinase, acting through the HDA-4 class II histone deacetylase and the MEF-2 M…	7TM chemoreceptor, sra family
B0024.1	WBGene00000722	col-149		collagen
B0024.15	WBGene00007104	B0024.15
B0205.4	WBGene00015019	B0205.4	The B0205.4 gene encodes a homolog of the human gene FUT1, which when mutated leads to leukocyte adhesion deficiency, type II (OMIM:266265).
B0213.12	WBGene00015042	cyp-34A7		cytochrome P450
B0222.4	WBGene00006418	tag-38		glutamate decarboxylase
B0222.7	WBGene00000718	col-145
B0252.5	WBGene00015089	B0252.5
B0304.3	WBGene00015135	cyp-23A1	cyp-23A1 encodes a cytochrome P450 homologous to the human gene CYP7B1, which when mutated leads to giant cell hepatitis (OMIM:231100); as a cytochrome P450, CYP-23A1 is predicted to function as a membrane-associated, heme-containing NADPH-dependent monooxygenases that catalyzes the oxidative metabolism of a variety of exogenous compounds and endogenous substrates.	Cytochrome P450
B0344.2	WBGene00006955	wrt-9	wrt-9 encodes a hedgehog-like protein, with an N-terminal signal sequence, a Wart domain, and a C-terminal region of proline-rich, low-complexity sequence; the Wart domain is predicted to form a cysteine-crosslinked protein involved in intercellular signalling, and it has subtle similarity to the N-terminal Hedge domain of HEDGEHOG proteins; WRT-9 has no obvious function in RNAi assays.
B0393.4	WBGene00007169	B0393.4
B0393.5	WBGene00007170	B0393.5		EGF-like aspartic acid and asparagine hydroxylation sites
B0395.2	WBGene00007174	mboa-1	mboa-1 encodes a putative acyl-Coenzyme A:cholesterol ('sterol') O-acyltransferase, orthologous to human SOAT1 (OMIM:102642); MBOA-1 is required for normal locomotion and normally long lifespan in mass RNAi assays; mboa-1 is expressed in the seam cells and nervous systems of larvae and adults, and in the adult reproductive system.	Sterol O-acyltransferase
B0412.1	WBGene00000895	dac-1	dac-1 encodes the C. elegans ortholog of Dachshund, a transcriptional regulator first described in Drosophila that is a member of the SKI/SNO/DAC family of proteins; dac-1 is expressed at higher levels in the AFD thermosensory neurons as compared to the AWB olfactory neurons and likely plays a role in thermosensory behavior as on thermal gradients dac-1 mutants fail to suppress cryophilic drive b…	yeast NUD1 protein
B0454.8	WBGene00015199	B0454.8
B0495.4	WBGene00003730	nhx-2	nhx-2 encodes a sodium/proton exchanger expressed in the apical membranes of intestinal cells; NHX-2 is required for normally high growth rates, and for propagation or maintenance of the germline, NHX-2 is thought to prevent intracellular acidification by catalysing the electroneutral exchange of extracellular sodium for an intracellular proton.	NA(+)/H(+) exchanger
B0507.7	WBGene00015224	B0507.7
BE10.2	WBGene00007210	BE10.2
C01B10.6	WBGene00015280	C01B10.6
C01F1.5	WBGene00015300	C01F1.5
C01H6.1	WBGene00000637	col-61		collagen
C02B8.5	WBGene00015323	C02B8.5	C02B8.5 encodes a homolog of the functionally active Fmrf Receptor (FR; CG2114) of D. melanogaster; it is thus possible that C02B8.5 is a receptor for one of the FMRF-like neurotransmitters in C. elegans (e.g., FLP-1 through FLP-12).
C02D4.1	WBGene00007262	jud-4	jud-4 encodes an unfamiliar protein, putatively secreted, that is required both for normal sensitivity to ethanol and for survival after freezing and thawing; JUD-4 is expressed in hypodermis and vulval muscles; JUD-4 is orthologous to Brugia malayi Bm1_40315, but lacks obvious orthologies to non-nematode proteins; JUD-4's C-terminal domain has possible similarity to F40E10.5, and to proteins suc…
C02D5.1	WBGene00015335	acdh-6		Isovaleryl-CoA dehydrogenase
C02G6.1	WBGene00015359	C02G6.1		peptidase
C03B1.2	WBGene00015373	C03B1.2
C04G2.9	WBGene00007308	C04G2.9
C04G6.1	WBGene00003402	mpk-2	mpk-2 encodes a mitogen activated protein (MAP) kinase; by homology, MPK-2 is predicted to function as a serine/threonine kinase that acts downstream of a receptor tyrosine kinase in a cell signaling pathway; however, as loss of mpk-2 activity via large-scale RNAi screens does not produce any obvious abnormalities, the precise role of MPK-2 in C. elegans development and/or behavior is not yet kno…	Ser/Thr protein kinase
C05D11.6	WBGene00003523	nas-4	nas-4 encodes a predicted extracellular matrix metalloprotease of the M12A (astacin) family that contains an N-terminal signal sequence and a catalytic domain, but no recognizable regulatory domains in the C-terminus; as loss of nas-4 activity via RNAi results in no obvious abnormalities, the precise role of NAS-4 in C. elegans development and/or behavior is not yet known; however, an NAS-4 trans…	zinc metalloprotease
C05D12.3	WBGene00014666	C05D12.3
C05E11.7	WBGene00015496	C05E11.7
C06B3.3	WBGene00007362	cyp-35C1	cyp-35C1 encodes one of over 80 C. elegans cytochrome P450s, NADPH-dependent monooxygenases that metabolize endogenous and exogenous compounds; RT-PCR experiments indicate that cyp-35C1 mRNA is upregulated in response to treatment with xenobiotics, such as PCBs (polychlorinated biphenyls) or PAHs (polycyclic aromatic hydrocarbons); loss of cyp-35A/C gene family activity in the presence of xenobio…	cytochrome P450
C06B3.8	WBGene00001552	gcy-32	gcy-32 encodes a predicted guanylate cyclase; expressed in URX, AQR, and PQR neurons.	guanylate cyclase
C06E1.3	WBGene00015519	C06E1.3
C06E1.7	WBGene00015522	C06E1.7
C06E2.1	WBGene00015527	C06E2.1
C06G1.1	WBGene00015545	C06G1.1
C07A9.4	WBGene00003571	ncx-6	ncx-6 encodes a putative Na[+]/Ca[2+] exchanger of uncertain stoichiometry and affinity, orthologous to human SLC24A6 and paralogous to NCX-7/-10; NCX-6 may function intracellularly; NCX-6 has tandem Calx-alpha domains predicted to carry out ion transport; NCX-6 has no obvious function in mass RNAi assays.	Na/Ca,K antiporter
C07A9.8	WBGene00007404	C07A9.8		Putative membrane protein
C07E3.5	WBGene00007416	C07E3.5
C07G1.1	WBGene00006620	try-2	try-2 encodes a homolog of human TRYP1 and ELA2; mutation of human TRYP1 or ELA2 leads, respectively, to hereditary pancreatitis (OMIM:276000) or cyclic haematopoiesis (OMIM:162800).	peptidase
C08H9.1	WBGene00007462	C08H9.1		serine carboxypeptidase
C09B8.4	WBGene00015623	C09B8.4
C09D1.2	WBGene00015631	clec-89
C09E7.10	WBGene00044295	C09E7.10
C09E8.2	WBGene00015645	lips-7
C09G12.1	WBGene00015651	C09G12.1	C09G12.1 encodes a paired-like homeodomain protein of the K50 class, which has no obvious function in mass RNAi assays.	homeobox protein
C09H5.2	WBGene00015660	catp-3		ATPase
C10C5.5	WBGene00007509	C10C5.5		aminoacylase-1
C10H11.3	WBGene00015692	ugt-25		ugt family
C12C8.2	WBGene00007533	C12C8.2	C12C8.2 encodes a putative cystathionine gamma-lyase orthologous to human CTH (OMIM:607657, mutated in cystathioninuria), and paralogous to F22B8.6 and ZK1127.10; C12C8.2 has no obvious function in mass RNAi assays, and (unlike its paralog ZK1127.10) does not inhibit DHC-1 in vivo.	L-methionine-alpha-deamino-gamma-mercaptomethane lyase
C12D8.18	WBGene00044174	fipr-5
C13C12.2	WBGene00007552	C13C12.2
C15A11.3	WBGene00004944	sol-1		CUB domain
C15H11.13	WBGene00077576	C15H11.13
C15H11.2	WBGene00007614	gnrr-2		G-protein coupled receptor
C16C4.5	WBGene00015829	math-15
C16C8.2	WBGene00015841	C16C8.2		peroxidase precursor
C16D9.2	WBGene00004395	rol-3	rol-3 was identified in screens for recessive mutations that affect body morphology; strong loss-of-function mutations in rol-3 result in early-to-mid larval lethality, while weaker mutations result in animals that are left-handed rollers at the adult stage only; lethal rol-3 mutations are suppressed by mutations in srl-1 and srl-2.	tyrosine-protein kinase
C17B7.8	WBGene00015882	C17B7.8	C17B7.8 encodes a neprilysin; neprilysins are thermolysin-like zinc metallopeptidases, found on the outer surface of animal cells, that negatively regulate small signalling peptides (e.g., enkephalin, tachykinin, insulin, and natriuretic peptides) by cleaving them; C17B7.8 has no clear orthologs in other organisms.
C17C3.12	WBGene00015894	acdh-2	acdh-2 encodes a short-chain acyl-CoA dehydrogenase; ACDH-2 is predicted to be a mitochondrial enzyme that catalyzes the first step of fatty acid beta-oxidation and thus plays a key role in energy production; steady-state acdh-2 mRNA levels are under the control of the MDT-15 mediator complex subunit; in addition, gene expression studies indicate that acdh-2 expression is downregulated in fasted …	acyl-CoA dehydrogenase
C17E7.8	WBGene00003714	nhr-124		nuclear hormone receptor
C17H1.6	WBGene00007659	C17H1.6
C17H1.9	WBGene00007662	C17H1.9
C17H12.12	WBGene00015937	C17H12.12
C17H12.5	WBGene00015931	C17H12.5		protein-tyrosine phosphatase
C18B10.6	WBGene00015963	C18B10.6
C18B2.1	WBGene00015952	C18B2.1
C18B2.2	WBGene00015953	C18B2.2
C18D11.7	WBGene00044232	C18D11.7
C18D4.2	WBGene00007672	fbxa-136
C18E9.5	WBGene00007685	C18E9.5
C18E9.8	WBGene00007688	C18E9.8	C18E9.8 is orthologous to the human gene JOINED TO JAZF1 (JJAZ1; OMIM:606245), which when mutated leads to disease.
C23H5.7	WBGene00016026	C23H5.7		cyclic nucleotide-binding protein
C24B5.3	WBGene00004216	ptr-1	ptr-1 encodes an ortholog of Drosophila and human PTCHD3, which defines one of seven paralogous families of sterol sensing domain (SSD) proteins; individually, PTR-1 is weakly required for normal molting from L4 to adult stages; however, PTR-1, in conjunction with either PTR-16 alone or with PTR-6 and PTR-10, is strongly required for both molting and viability, with double ptr-1/-16 or triple ptr…
C24G6.7	WBGene00001710	grl-1	grl-1 encodes a hedgehog-like protein, with an N-terminal signal sequence, a central proline-rich region, and a C-terminal Ground-like (Grl) domain; GRL-1 is expressed in intestine, neurons, and larval arcade cells; the Grl domain is predicted to form a cysteine-crosslinked protein involved in intercellular signalling, and it has subtle similarity to the N-terminal Hedge domain of HEDGEHOG protei…
C25A8.5	WBGene00016085	C25A8.5		protein-tyrosine kinase
C25D7.4	WBGene00007716	fbxa-82	This gene encodes a protein containing an F-box, a motif predicted to mediate protein-protein interactions either with homologs of yeast Skp-1p or with other proteins; this gene's encoded protein also contains an FTH/DUF38 motif, which may also mediate protein-protein interaction.
C25E10.4	WBGene00016094	C25E10.4
C26B2.3	WBGene00003625	nhr-31	nhr-31 encodes one of over 200 C. elegans nuclear receptors; nhr-31 activity is required for proper growth, development, and function of the excretory cell; in regulating excretory cell development, NHR-31 appears to function by controlling the expression of genes encoding subunits of the vacuolar ATPase; an nhr-31::gfp promoter fusion is expressed at high levels in the excretory cell beginning a…	zinc finger protein
C26F1.6	WBGene00016149	C26F1.6	C26F1.6 encodes a homolog of the functionally active Fmrf Receptor (FR; CG2114) of D. melanogaster; it is thus possible that C26F1.6 is a receptor for one of the FMRF-like neurotransmitters in C. elegans (e.g., FLP-1 through FLP-12).
C27A7.2	WBGene00007754	C27A7.2
C27D8.1	WBGene00007777	C27D8.1		serine/threonine kinase
C28C12.4	WBGene00016180	C28C12.4
C28H8.5	WBGene00016196	C28H8.5
C29F3.1	WBGene00001150	ech-1	ech-1 encodes an enoyl-CoA hydratase; loss of ech-1 activity via RNAi results in reduced body fat, consistent with ECH-1's predicted role in fatty acid metabolism; expression of ech-1 mRNA is positively regulated by the NHR-49 nuclear receptor.	long-chain enoyl-CoA hydratase
C29F3.2	WBGene00006954	wrt-8	wrt-8 encodes a hedgehog-like protein, with (from N- to C-terminus) a signal sequence, a Wart domain, an short region of low-complexity sequence, and a Hint/Hog domain; WRT-8 is strongly expressed in hypodermal syncytia hyp6-hyp10 throughout life, and in in 12 subventral P cells and their descendants from 3-fold embryo to L2 larva stages; the Hint/Hog domain is predicted to cut WRT-8 into two hal…	Hint module
C30F12.1	WBGene00016260	C30F12.1
C30G12.1	WBGene00016273	C30G12.1
C30G12.3	WBGene00016275	C30G12.3
C30G4.2	WBGene00016268	C30G4.2
C30H6.1	WBGene00007820	clec-199		Lectin C-type domain short and long forms
C30H6.2	WBGene00006487	tag-141	tag-141/C30H6.2 encodes a putative zinc transporter orthologous to human SLC39A4 (OMIM:607059, mutated in acrodermatitis enteropathica).
C30H6.5	WBGene00007823	C30H6.5
C31A11.1	WBGene00007829	oac-5
C32B5.8	WBGene00016301	fbxc-6
C32E12.3	WBGene00016329	osr-1
C32H11.1	WBGene00007864	C32H11.1
C33A12.6	WBGene00007885	ugt-21		UDP-glucuronysltransferase
C33B4.2	WBGene00007891	C33B4.2
C33D3.3	WBGene00007894	C33D3.3
C33G3.3	WBGene00007903	lgc-21
C33H5.2	WBGene00016371	C33H5.2
C34B7.3	WBGene00007913	cyp-36A1		cytochrome P450
C34E10.9	WBGene00016410	C34E10.9
C35A11.4	WBGene00016431	C35A11.4		sugar transporter
C35A5.5	WBGene00007949	C35A5.5
C35C5.2	WBGene00007954	C35C5.2
C36A4.2	WBGene00007964	cyp-25A2		cytochrome P450
C36B7.7	WBGene00001841	hen-1	hen-1 encodes a secreted protein that contains a low-density lipoprotein (LDL) receptor motif A; HEN-1 activity is required for integration of sensory stimuli and behavioral plasticity; a hen-1::GFP reporter is expressed in pharyngeal muscles, the vulva, and weakly in a subset of neurons; antibodies to HEN-1 protein detect expression exclusively in the AIY and ASE neurons, where HEN-1 appears to …
C36C9.4	WBGene00016487	C36C9.4
C36H8.1	WBGene00007987	C36H8.1		major sperm protein like
C37C3.10	WBGene00016502	C37C3.10
C38C6.3	WBGene00007996	C38C6.3
C39B5.3	WBGene00016521	fbxa-62
C39D10.6	WBGene00016533	C39D10.6
C39H7.9	WBGene00044125	srsx-16		7TM chemoreceptor, srsx family
C40A11.8	WBGene00016551	C40A11.8
C41G6.14	WBGene00005538	sri-26		7TM chemoreceptor, sri family
C41G7.6	WBGene00008063	C41G7.6
C42D4.2	WBGene00016595	C42D4.2		esterase
C42D8.5	WBGene00000039	acn-1	acn-1 encodes an ACE-like protein required for larval development and adult morphogenesis, and probably for cell fusion in larval seam cells; ACN-1 lacks not only the HExxH consensus metallopeptidase motif, but also other active site residues found in the sequence HEAI/VxD of mammalian and insect ACEs; acn-1 is expressed in hypodermal cells, vulval precursor cells, and ray papillae in the male ta…	peptidase
C43G2.5	WBGene00006621	try-3		peptidase
C43H6.6	WBGene00016619	C43H6.6
C44B11.1	WBGene00016633	C44B11.1
C44B7.8	WBGene00004058	pmp-1	pmp-1 encodes an ATP-binding cassette (ABC) transporter most closely related to the peroxisomal membrane proteins; pmp-1 activity is required for efficient RNA interference (RNAi) of a germline-expressed target, pop-1.	ATP-binding protein
C44C10.3	WBGene00008084	C44C10.3		Sugar (and other) transporters
C45G9.10	WBGene00016681	C45G9.10
C45G9.6	WBGene00016677	C45G9.6
C45H4.2	WBGene00016686	cyp-33C1		cytochrome P450
C46E1.2	WBGene00001556	gcy-36	gcy-36 encodes a predicted soluble guanylate cyclase that genetically interacts with npr-1 with respect to feeding behavior; expressed in AQR, PQR, and URX3.	GUANYLATE CYCLASE SOLUBLE, BETA-2 CHAIN (EC 4.6.1.2) (76 KD CHAIN)
C46E1.3	WBGene00008116	C46E1.3
C47A4.2	WBGene00008123	C47A4.2
C47E12.6	WBGene00008150	C47E12.6
C48E7.8	WBGene00016753	oac-9
C49A9.1	WBGene00016755	C49A9.1
C49C3.4	WBGene00008194	C49C3.4		EGF-like domain
C49C8.1	WBGene00016765	C49C8.1		serine/threonine-protein kinase
C49F5.8	WBGene00008212	C49F5.8
C50C3.5	WBGene00016801	C50C3.5		Calmodulin
C50F4.10	WBGene00008235	C50F4.10		serine/threonine kinase
C50F7.5	WBGene00016845	C50F7.5
C53B4.7	WBGene00000266	bre-1	bre-1 is required for Cry5B toxicity.
C54A12.2	WBGene00016909	C54A12.2
C54C8.4	WBGene00008292	C54C8.4		glycosyltransferase
C54F6.12	WBGene00016929	C54F6.12
C55B7.12	WBGene00000483	che-1	che-1 encodes a C2H2-type zinc finger-containing transcription factor orthologous to Drosophila GLASS, which is required for photoreceptor cell differentiation; CHE-1 is required for determining the identity and function of the amphid ASE neurons, the major neurons that mediate chemotaxis to water-soluble attractants; CHE-1 is expressed predominantly in the ASE neurons and regulates, either direc…	zinc finger prtoein
C55C3.6	WBGene00016956	C55C3.6
C56C10.4	WBGene00016962	C56C10.4
C56E6.5	WBGene00016973	abch-1		ATP-binding
D1007.1	WBGene00000440	ceh-17	ceh-17 encodes a phox-2-like homeodomain protein that is a member of the Q50 paired-like class of homeobox proteins and the vertebrate orthologue of Phox2a and Phox2b; that affects ALA and SIA axonal development; ceh-17 affects ALA and SIA antero-posterior axonal growth and navigation, and is expressed in five neurons of the ring ganglia (ALA and the 4 SIAs) with strongest expression in embryos a…	homeobox protein
D1014.5	WBGene00017018	D1014.5
D1044.3	WBGene00004114	pqn-25	The protein product of this gene is predicted to contain a glutamine/asparagine (Q/N)-rich ('prion') domain, by the algorithm of Michelitsch and Weissman (as of the WS77 release of WormBase, i.e., in wormpep77).
D2024.4	WBGene00017052	D2024.4
E02C12.6	WBGene00017092	E02C12.6
E03G2.4	WBGene00000759	col-186		cuticle collagen
E03H12.5	WBGene00017112	E03H12.5
EGAP2.3	WBGene00004020	pho-1	pho-1 encodes the major C. elegans intestinal acid phosphatase; as loss of PHO-1 function via RNA-mediated interference (RNAi) does not result in any abnormalities, PHO-1 may function redundantly with other acid phosphatases; PHO-1 intestinal expression appears to be positively regulated by CKI-1, a cyclin-dependent kinase inhibitor, and negatively regulated by POP-1, a TCF/LEF transcription fact…
F01D5.6	WBGene00008496	F01D5.6
F01G10.10	WBGene00008512	F01G10.10		lipopolysaccharide-binding protein like
F01G10.4	WBGene00008507	F01G10.4
F01G10.6	WBGene00008509	F01G10.6
F02A9.1	WBGene00008513	F02A9.1
F02C12.4	WBGene00008518	F02C12.4
F02E11.1	WBGene00017179	wht-4		ABC transpoter
F02E9.3	WBGene00008529	F02E9.3		ubiquitin carboxyl-terminal hydrolase
F07A11.1	WBGene00008545	F07A11.1
F07E5.1	WBGene00017207	fbxb-6	This gene encodes a protein containing an F-box, a motif predicted to mediate protein-protein interactions either with homologs of yeast Skp-1p or with other proteins.
F07F6.5	WBGene00017218	dct-5
F07F6.9	WBGene00006005	srx-114		7TM chemoreceptor, srx family
F07G6.6	WBGene00017225	fbxa-52
F07H5.9	WBGene00008560	pho-13		acid phosphatase
F08G5.7	WBGene00023502	clec-184
F09A5.2	WBGene00008599	F09A5.2		tyrosine-protein kinase
F09B12.1	WBGene00008605	mlt-9
F09C12.2	WBGene00017277	F09C12.2	F09C12.2 encodes a kinase most closely related to mitogen-activated protein (MAP) kinases; as loss of F09C12.2 activity via mutation or large-scale RNAi results in no obvious defects, the precise role of F09C12.2 in C. elegans development and/or behavior is not yet known.	Ser/Thr protein kinase
F09E5.10	WBGene00017288	F09E5.10
F09F3.9	WBGene00008629	cpt-5		carnitine palmitoyltransferase like
F09G2.6	WBGene00017315	ugt-36		ugt family
F09G8.8	WBGene00017322	clec-160
F10A3.1	WBGene00008631	F10A3.1	F10A3.1 encodes a claudin homolog that may be required for normal cohesion of apical junctions in epithelia; F10A3.1 is worm-specific, with obvious homologs only in C. elegans; F10A3.1 has no obvious function in mass RNAi assays; claudins are integral membrane proteins with four transmembrane sequences that are found in mammalian tight junctions (TJs), induce TJs when transgenically expressed in …
F10A3.2	WBGene00008632	fbxa-88	This gene encodes a protein containing an F-box, a motif predicted to mediate protein-protein interactions either with homologs of yeast Skp-1p or with other proteins; this gene's encoded protein also contains an FTH/DUF38 motif, which may also mediate protein-protein interaction.
F10B5.3	WBGene00008640	F10B5.3		Zinc finger, C2H2 type
F10C2.7	WBGene00008647	F10C2.7
F10D11.5	WBGene00008651	F10D11.5
F10D11.6	WBGene00008652	F10D11.6
F10D2.2	WBGene00017329	ugt-39		ugt family
F10F2.3	WBGene00008655	lips-3		lipase (Bacillus subtilis)
F11C1.3	WBGene00008692	F11C1.3		membrane glycoprotein
F11C7.6	WBGene00017378	F11C7.6
F11D11.11	WBGene00045361	clec-253
F11D11.3	WBGene00008698	F11D11.3
F11D5.7	WBGene00043980	F11D5.7
F11E6.10	WBGene00008713	F11E6.10
F11G11.9	WBGene00017387	F11G11.9
F13A7.9	WBGene00004817	skr-11	The skr-11 gene encodes a homolog of Skp1 in S. cerevisiae that has no known function in vivo, since skr-11(RNAi) animals are at least superficially normal.
F13B12.4	WBGene00008732	F13B12.4		cysteine synthase like
F13D12.9	WBGene00008743	F13D12.9
F13H8.5	WBGene00017438	F13H8.5	F13H8.5 encodes a protein with a domain of unknown function (DB; IPR002602) that is found in several worm proteins, and a glutamine/asparagine-rich domain.	Phospholipase ADRAB-B (Rabbit)
F15A2.5	WBGene00001164	efn-3	efn-3 encodes a potential GPI-modified ephrin that is, with EFN-2, is required for normal epidermal organization in the male tail; EFN-3, along with EFN-1 and EFN-2, activates the VAB-1 tyrosine kinase in vivo and binds it in vitro, and has a minor role in embryonic epiboly.
F15E11.4	WBGene00017493	F15E11.4
F15H10.8	WBGene00008875	F15H10.8
F16H6.1	WBGene00008891	clec-42		Lectin C-type domain short and long forms, CUB domain
F17A2.3	WBGene00008902	F17A2.3		PHD-finger.
F17B5.6	WBGene00044058	F17B5.6
F17C8.7	WBGene00008912	F17C8.7
F17E9.5	WBGene00017542	F17E9.5
F18A1.1	WBGene00017545	F18A1.1
F18F11.4	WBGene00017577	F18F11.4		serine/threonine-protein kinase
F19C7.4	WBGene00017594	F19C7.4		lysosomal carboxypeptidase
F19C7.6	WBGene00017596	F19C7.6
F21F3.2	WBGene00017672	F21F3.2		ser/thr-protein kinase
F21H7.14	WBGene00005317	srh-98
F22B5.5	WBGene00009043	F22B5.5
F22E10.1	WBGene00004006	pgp-12	pgp-12 encodes a transmembrane protein that is a member of the P-glycoprotein subclass of ATP-binding cassette (ABC) transporters; although loss of pgp-12 function via mutation or RNAi results in no obvious defects, pgp-12 promoter fusion constructs reveal expression in the excretory cell, consistent with a role for pgp-12 in metabolite transporter activity; pgp-12 expression is regulated by the …	p-glycoprotein (MDR)
F22F4.1	WBGene00017716	F22F4.1
F23B2.12	WBGene00003957	pcp-2		lysosomal carboxypeptidase
F23C8.1	WBGene00017731	F23C8.1
F23F12.4	WBGene00017752	sdz-15	This gene encodes a protein containing an F-box, a motif predicted to mediate protein-protein interactions either with homologs of yeast Skp-1p or with other proteins.
F23H12.4	WBGene00005018	sqt-3	sqt-3 encodes a cuticle collagen; during development, sqt-3 activity is essential for viability and normal body morphology; genetic and expression studies indicate that SQT-3 is a cuticle component at all stages of development and that SQT-3 likely forms higher order cuticular structures with the DPY-17 cuticular collagen, both of which are candidate substrates for the DPY-31 procollagen C-protei…	collagen
F25A2.1	WBGene00017764	F25A2.1
F25D1.3	WBGene00009108	F25D1.3
F25D1.5	WBGene00009110	F25D1.5		dehydrogenase
F25E5.2	WBGene00017783	F25E5.2
F25F2.1	WBGene00009115	F25F2.1		serine/threonine kinase
F25H8.6	WBGene00009133	zbed-6	zbed-6 encodes a protein that contains a BED-type zinc finger domain; loss of zbed-6 activity in large-scale RNAi screens indicates that zbed-6 is required for larval development.
F25H9.3	WBGene00009136	F25H9.3
F26A1.9	WBGene00017807	F26A1.9
F26A3.5	WBGene00009143	F26A3.5
F26B1.4	WBGene00000634	col-58
F26D2.3	WBGene00009148	F26D2.3
F27B3.2	WBGene00000060	acr-21	acr-21 encodes an alpha subunit of nicotinic acetylcholine receptor (nAChR); ACR-21 is a highly divergent member of the 'ACR-16' class of nAChR subunits, which includes ACR-7, ACR-9, ACR-10, ACR-11, ACR-14, ACR-15, ACR-16, and ACR-19, and is most closely related to the alpha-7 subunits of vertebrate nAChRs.	channel protein
F28A12.1	WBGene00017879	F28A12.1
F28B4.3	WBGene00017892	F28B4.3		EGF-like repeat
F28G4.2	WBGene00009227	F28G4.2
F28G4.4	WBGene00009229	F28G4.4
F29C12.1	WBGene00004120	pqn-32	The protein product of this gene is predicted to contain a glutamine/asparagine (Q/N)-rich ('prion') domain, by the algorithm of Michelitsch and Weissman (as of the WS77 release of WormBase, i.e., in wormpep77).
F31F4.11	WBGene00017960	F31F4.11
F31F7.2	WBGene00017965	F31F7.2
F32B4.8	WBGene00009318	F32B4.8
F32B6.10	WBGene00009324	F32B6.10		serine/threonine kinase
F32B6.4	WBGene00009321	F32B6.4
F32B6.5	WBGene00006056	sss-1
F32D8.2	WBGene00009327	F32D8.2
F32E10.7	WBGene00017994	F32E10.7
F33D11.3	WBGene00000631	col-54		collagen
F33D11.4	WBGene00000436	ceh-12	ceh-12 encodes a homeobox protein orthologous to human HLXB9 (OMIM:142994, mutated in Currarino syndrome) that is required for normal synaptic inputs to motor neurons VA2-VA10 (sisters to VB3-VB11); ceh-12 is expressed in VB motor neurons, but repressed in their VA siblings by UNC-4 and UNC-37; unc-4 or unc-37 mutants show ectopic CEH-12 expression in VA neurons, which is both necessary and suffi…	homeobox protein
F33D4.6	WBGene00017998	F33D4.6
F35C5.7	WBGene00009395	clec-64		Lectin C-type domain short and long forms, von Willebrand factor type A domain
F35D11.7	WBGene00018047	clec-136
F35E8.11	WBGene00000412	cdr-1	cdr-1 encodes a member of the cadmium-inducible lysosomal family that affects susceptibility to cadmium toxicity; expressed in intestinal cells.	glutathione S-transferases
F35F10.4	WBGene00018054	F35F10.4
F35F10.7	WBGene00018057	F35F10.7
F36D3.4	WBGene00009470	F36D3.4
F36D4.1	WBGene00018087	F36D4.1
F37B1.8	WBGene00001767	gst-19		glutathione S-transferase
F37B12.1	WBGene00009504	F37B12.1
F37B4.7	WBGene00018138	folt-2	folt-2 encodes a putative folate transporter; FOLT-2 is orthologous to human SLC19A1 (OMIM:600424), SLC19A2 (OMIM:603941, mutated in thiamine-responsive megaloblastic anemia syndrome), and SLC19A3 (OMIM:606152, mutated in biotin-responsive basal ganglia disease); heterologously expressed FOLT-2 does not significantly transport folate; FOLT-2 has no obvious function in mass RNAi assays, perhaps be…	folate transporter
F38A1.9	WBGene00009522	F38A1.9		C-type lectin superfamily member.
F38H4.4	WBGene00009548	F38H4.4		protein tyrosine phosphatase
F39D8.2	WBGene00009560	psa-3
F39G3.2	WBGene00018207	F39G3.2
F40D4.12	WBGene00009571	F40D4.12
F40F9.3	WBGene00009581	F40F9.3		PDZ domain (Also known as DHR or GLGF).
F41B5.7	WBGene00018264	cyp-33C6		cytochrome P450
F41C3.11	WBGene00018275	F41C3.11
F41D9.2	WBGene00018282	F41D9.2
F41E6.14	WBGene00018295	oac-29
F41H10.7	WBGene00001243	elo-5	The elo-5 gene encodes a paralog of elo-1 and elo-2, each of which encodes a polyunsaturated fatty acid (PUFA) elongase; ELO-5 is required for normally rapid growth and for normal fatty acid composition.	integral membrane protein
F42A9.7	WBGene00018336	F42A9.7
F42E11.3	WBGene00009633	F42E11.3
F42G2.4	WBGene00018353	fbxa-182	This gene encodes a protein containing an F-box, a motif predicted to mediate protein-protein interactions either with homologs of yeast Skp-1p or with other proteins; this gene's encoded protein also contains an FTH/DUF38 motif, which may also mediate protein-protein interaction.
F43H9.2	WBGene00018398	sptl-2		serine palmtoyltransferase
F44C4.3	WBGene00000784	cpr-4	cpr-4 encodes a cathepsin B-like cysteine protease expressed at all life stages.	cathepsin B-like cysteine proteinase 4 precursor
F44C8.7	WBGene00018414	F44C8.7
F44E2.4	WBGene00018418	F44E2.4
F44E5.2	WBGene00009689	F44E5.2		Leucine Rich Repeat (2 copies)
F44E7.7	WBGene00018429	F44E7.7
F44F4.6	WBGene00001626	gly-1	gly-1 encodes a transmembrane glycosyltransferase similar to 2/I N-acetylglucosaminyltransferase; in vitro, GLY-1 demonstrates UDP-Glc:GalB1-3GalNac-R glucosyltransferase activity; gly-1 expression is detected in adult hypodermal seam cells and possibly some neurons adjacent to the anterior bulb of the pharynx; neither gly-1 loss-of-function mutations nor RNA mediated interference (RNAi) result i…	beta-1,6-N-acetylglucosaminyltransferase
F44G3.10	WBGene00009710	F44G3.10	F44G3.10 encodes a claudin homolog that may be required for normal cohesion of apical junctions in epithelia; F44G3.10 is worm-specific, with obvious homologs only in C. elegans; F44G3.10 has no obvious function in mass RNAi assays; claudins are integral membrane proteins with four transmembrane sequences that are found in mammalian tight junctions (TJs), induce TJs when transgenically expressed …
F45E1.5	WBGene00018466	F45E1.5
F45E4.6	WBGene00018471	F45E4.6
F45F2.6	WBGene00018479	otpl-6	otpl-6 encodes an ortholog of otopetrins such as human OTOP1 (OMIM:607806), OTOP2 (OMIM:607827), and OTOP3 (OMIM:607828), along with other homologs in fish and insects (such as crustacean OTOPLb); otopetrins are predicted to have 12 transmembrane helices; by homology with OTOP1 and OTOPLb, OTPL-6 might regulate intracellular calcium fluxes during extracellular stimuli, promote extracellular calci…
F46A8.5	WBGene00009748	F46A8.5
F46A9.3	WBGene00006681	twk-29		potassium channel protein
F46B3.1	WBGene00009756	F46B3.1
F46B3.5	WBGene00001691	grd-2	grd-2 encodes a hedgehog-like protein, with (from N- to C-terminus) a signal sequence, four Ground domains, an short region of low-complexity sequence, and a Hint/Hog domain; the Hint/Hog domain is predicted to cut GRD-2 into two halves and then covalently link cholesterol to the C-terminus of the Ground domain; the four N-terminal Ground domains are predicted to form one or more cysteine-crossli…
F46B6.9	WBGene00009774	F46B6.9
F46C8.6	WBGene00001069	dpy-7	dpy-7 encodes a cuticular collagen; DPY-7 functions as a structural constituent of the extracellular cuticle whose activity is required for normal cuticular morphology and hence, proper body form.	cuticle collagen
F46C8.8	WBGene00018487	F46C8.8
F46F11.3	WBGene00006456	tag-83
F47B8.11	WBGene00006057	sss-2
F47C10.6	WBGene00018543	ugt-32		ugt family
F47F6.3	WBGene00018573	oac-30
F48A11.2	WBGene00018583	F48A11.2
F48B9.5	WBGene00018591	F48B9.5		paired box protein
F48C1.7	WBGene00004965	spe-11	spe-11 encodes a novel protein that is required for early embryonic development and for regulating the dynamic morphology of sperm pseudopods; although the precise biological role of SPE-11 is not yet known, SPE-11 is one of the few paternally provided proteins known to be essential for embryogenesis, and may constitute a sperm-associated factor required for oocyte activation; SPE-11 is first det…
F49F1.6	WBGene00018646	F49F1.6
F52B11.3	WBGene00009926	noah-2	noah-2 encodes a PAN and ZP domain-containing protein that is related to the Drosophila extracellular matrix component NompA (no-mechanoreceptor-potential A); loss of noah-2 function via RNAi indicates that NOAH-2 activity is essential for molting; in addition, NOAH-2 appears to be required for embryonic and larval development, reproduction, coordinated locomotion, and the overall health of the a…
F52D1.3	WBGene00004127	pqn-40	The protein product of this gene is predicted to contain a glutamine/asparagine (Q/N)-rich ('prion') domain, by the algorithm of Michelitsch and Weissman (as of the WS77 release of WormBase, i.e., in wormpep77).
F52D10.5	WBGene00006065	sto-3		erythrocyte band 7 protein
F52D2.8	WBGene00018690	fbxa-46	This gene encodes a protein containing an F-box, a motif predicted to mediate protein-protein interactions either with homologs of yeast Skp-1p or with other proteins; this gene's encoded protein also contains an FTH/DUF38 motif, which may also mediate protein-protein interaction.
F52F10.2	WBGene00018706	F52F10.2
F52F10.4	WBGene00018708	oac-32
F53B1.4	WBGene00018737	F53B1.4		thymidine diphosphoglucose 4,6-dehydratase
F53B3.6	WBGene00018744	F53B3.6		zinc finger protein
F53C3.1	WBGene00018745	F53C3.1		protein kinase
F53F1.5	WBGene00009983	F53F1.5		cuticlin
F54A5.3	WBGene00018788	shc-1	shc-1 encodes four proteins by multiple splicing, three of which are rather small (52-81 residues); however, one isoform (F54A5.3A, 316 residues) is a ortholog of vertebrate Shc proteins (e.g., p52/p46SHC and p66SHC); like its orthologs, F54A5.3A has a PTB and an SH2 domain in N- to C-terminal order; shc-1 interacts with both the JNK and insulin signaling pathways to regulate stress response and …
F54B11.2	WBGene00000621	col-44	col-44 encodes a cuticle collagen.	collagen
F54B11.9	WBGene00010032	F54B11.9
F54D1.1	WBGene00010046	F54D1.1
F54D10.4	WBGene00018805	F54D10.4
F54F11.2	WBGene00010070	F54F11.2	F54F11.2 encodes a neprilysin; neprilysins are thermolysin-like zinc metallopeptidases, found on the outer surface of animal cells, that negatively regulate small signalling peptides (e.g., enkephalin, tachykinin, insulin, and natriuretic peptides) by cleaving them; F54F11.2 has no clear orthologs in other organisms.	Zinc-binding metalloprotease
F54F3.3	WBGene00010062	F54F3.3		lipase
F54H5.2	WBGene00018839	F54H5.2
F55A11.5	WBGene00044631	bus-18	bus-18 is an uncloned gene required for colonization by Microbacterium nematophilum and the tail-swelling response to M. nematophilum infection, as well as for cuticle integrity, traction during movement, full body size, normally rapid growth, and vulval morphogenesis; bus-18 is also needed for normal cuticle antigens and resistance to emetine or colchicine, perhaps because its cuticle is abnorma…	1-acyl-glycerol-3-phosphate acyltransferase
F55C5.9	WBGene00005241	srh-16		G-protein coupled receptor, srh family
F55D12.4	WBGene00006790	unc-55	unc-55 encodes a nuclear receptor that is most closely related to Drosophila Seven-up and the vertebrate COUP (chicken ovalbumin upstream promoter) transcription factors; unc-55 activity is required for the VD motor neurons to adopt their normal synaptic pattern; unc-55 is expressed in a number of neurons, including the VD motor neurons.	nuclear hormone receptor
F55F3.4	WBGene00010118	F55F3.4
F55G1.12	WBGene00018905	F55G1.12
F55G11.9	WBGene00000021	abt-3
F56A12.2	WBGene00010143	F56A12.2
F56D2.8	WBGene00018968	F56D2.8
F56D3.1	WBGene00018969	F56D3.1
F56D6.14	WBGene00044476	F56D6.14
F56D6.2	WBGene00018971	clec-67		clec family, C-type lectin
F57B7.2	WBGene00010192	F57B7.2		SCP-like extracellular Proteins
F57B9.9	WBGene00004133	pqn-46	The protein product of this gene is predicted to contain a glutamine/asparagine (Q/N)-rich ('prion') domain, by the algorithm of Michelitsch and Weissman (as of the WS77 release of WormBase, i.e., in wormpep77).
F57F4.1	WBGene00019015	F57F4.1
F57F4.4	WBGene00019017	F57F4.4
F57F5.2	WBGene00001553	gcy-33	gcy-33 encodes a soluble guanylyl cyclase; a gcy-33::GFP reporter is expressed in the ciliated BAG head sensory neurons.	guanylate cyclase
F57G12.2	WBGene00010222	F57G12.2
F58A4.11	WBGene00001570	gei-13	gei-13 encodes a protein, with a BED finger domain (predicted to be DNA-binding) and a glutamine/asparagine-rich domain; GEI-13 physically interacts with GEX-3, and is required for normal body shape, cuticle synthesis, and locomotion.
F58B4.1	WBGene00003549	nas-31		zinc metalloprotease
F58B4.2	WBGene00010235	F58B4.2		cytochrome b5 like
F59A3.8	WBGene00019081	F59A3.8		protein kinase
F59A6.4	WBGene00019086	F59A6.4		Protein kinase
F59C6.8	WBGene00010327	F59C6.8
F59D12.3	WBGene00010331	F59D12.3
F59E11.2	WBGene00019109	F59E11.2
F59E12.4	WBGene00019120	npl-4.1
F59F5.5	WBGene00010344	F59F5.5
H02F09.2	WBGene00019145	H02F09.2
H03E18.1	WBGene00019148	H03E18.1
H04M03.1	WBGene00019151	H04M03.1
H04M03.4	WBGene00019154	glf-1	glf-1 encodes a UDP-galactopyranose mutase predicted to synthesize galactofuranose (Gal(f)) as a nucleotide sugar (UDP-Gal(f)); recombinant GLF-1 has biochemical activity either in vivo (expressed in E. coli) or in vitro; orthologs of GLF-1 are found in the urochordates Halocynthia and Ciona.
H19J13.1	WBGene00010403	otpl-8	otpl-8 encodes an ortholog of otopetrins such as human OTOP1 (OMIM:607806), OTOP2 (OMIM:607827), and OTOP3 (OMIM:607828), along with other homologs in fish and insects (such as crustacean OTOPLb); otopetrins are predicted to have 12 transmembrane helices; by homology with OTOP1 and OTOPLb, OTPL-8 might regulate intracellular calcium fluxes during extracellular stimuli, promote extracellular calci…
H23L24.4	WBGene00019231	H23L24.4		7tm_1
H25K10.1	WBGene00010411	H25K10.1
H25K10.4	WBGene00010413	H25K10.4
H37A05.2	WBGene00010426	H37A05.2
H42K12.3	WBGene00019272	H42K12.3
H43E16.1	WBGene00019273	H43E16.1
K01A2.11	WBGene00019285	cbn-1	cbn-1 encodes a protein that contains a predicted signal peptide and calcium-binding EF-hand motifs.	calcium-binding protein
K02A2.5	WBGene00019290	K02A2.5
K02A4.1	WBGene00001149	bcat-1	bcat-1 encodes a branched-chain amino acid aminotransferase that, by homology, is predicted to catalyze the first reaction in the catabolism of essential branched-chain amino acids such as leucine, isoleucine, and valine; in C. elegans, large-scale RNA-mediated interference (RNAi) screens indicate that bcat-1 activity is required for embryonic and larval development.	twt1 like protein
K02C4.2	WBGene00010501	K02C4.2
K02D3.2	WBGene00010505	K02D3.2
K02E10.4	WBGene00019318	K02E10.4
K02F6.1	WBGene00019335	K02F6.1
K03B8.2	WBGene00003536	nas-17	nas-17 encodes an astacin-like metalloprotease.	zinc metalloprotease
K03H1.13	WBGene00044903	K03H1.13
K03H6.1	WBGene00019367	K03H6.1
K03H9.2	WBGene00000651	col-75		collagen alpha chain
K04E7.1	WBGene00019383	K04E7.1
K04H4.6	WBGene00000799	crn-6
K05F1.9	WBGene00019410	K05F1.9
K06A1.2	WBGene00019425	K06A1.2
K06A4.5	WBGene00010595	haao-1		3-hydroxyanthranilate 3,4-dioxygenase
K06B9.2	WBGene00019439	K06B9.2	K06B9.2 encodes a putative UDP-N-acetylglucosamine pyrophosphorylase, paralogous to C36A4.4 and orthologous to human UAP1 (OMIM:602862) and UAP1L1; K06B9.2 is thought to catalyse the fourth step of the hexosamine pathway to UDP-N-acetylglucosamine or UDP-N-acetylgalactosamine; K06B9.2 transcripts are enriched during oogenesis; K06B9.2(RNAi) animals have an osmotically-sensitive embryonic lethal p…
K06C4.17	WBGene00019448	K06C4.17
K06C4.9	WBGene00019445	K06C4.9		transmemebrane protein
K07C5.7	WBGene00010630	ttll-15	ttll-15 encodes a putative tubulin polyaminoacid ligase orthologous to Drosophila melanogaster CG4089 and Tetrahymena thermophila TTLL15; TTLL-15 has no obvious function in mass RNAi assays.
K07C6.3	WBGene00019471	cyp-35B2		cytochrome P450
K07C6.4	WBGene00019472	cyp-35B1		cytochrome P450
K07E8.5	WBGene00019496	K07E8.5	K07E8.5 encodes a homolog of the functionally active Fmrf Receptor (FR; CG2114) of D. melanogaster; it is thus possible that K07E8.5 is a receptor for one of the FMRF-like neurotransmitters in C. elegans (e.g., FLP-1 through FLP-12).
K07H8.5	WBGene00019506	K07H8.5
K08B12.1	WBGene00019520	K08B12.1
K08C9.4	WBGene00000641	col-65
K08D8.4	WBGene00010658	K08D8.4
K08E7.5	WBGene00010673	K08E7.5
K08F8.5	WBGene00010682	K08F8.5
K08H10.6	WBGene00010698	K08H10.6		Sugar (and other) transporters
K09B11.10	WBGene00010714	K09B11.10
K09B3.1	WBGene00019545	K09B3.1
K09C6.7	WBGene00019561	K09C6.7
K09D9.2	WBGene00019565	cyp-35A3	cyp-35A3 encodes one of over 80 C. elegans cytochrome P450s, NADPH-dependent monooxygenases that metabolize endogenous and exogenous compounds; loss of cyp-35A/C gene family activity in the presence of xenobiotics can diminish the reproductive decline seen in wild-type worms treated with the same compounds; in addition, cyp-35A(RNAi) also results in a reduction of fat content; cyp-35A3 reporter g…	cytochrome P450
K09E10.2	WBGene00019580	oac-58
K09F5.2	WBGene00006925	vit-1		vit-1
K09F6.5	WBGene00019588	K09F6.5
K10C2.1	WBGene00019617	K10C2.1		serine carboxypeptidase
K10C8.2	WBGene00010735	K10C8.2	K10C8.2 encodes a homolog of the functionally active Fmrf Receptor (FR; CG2114) of D. melanogaster; it is thus possible that K10C8.2 is a receptor for one of the FMRF-like neurotransmitters in C. elegans (e.g., FLP-1 through FLP-12).	G-protein coupled receptor
K10D11.3	WBGene00010747	K10D11.3
K10D11.6	WBGene00010750	K10D11.6
K10G4.13	WBGene00077629	K10G4.13
K10G6.2	WBGene00019640	dos-2
K11E4.1	WBGene00010773	K11E4.1
K11G9.3	WBGene00019654	K11G9.3		esterase
M01E10.2	WBGene00001063	dpy-1	dpy-1 encodes a collagen that affects body length and alae formation; site of action localized to the hyp7 syncytium, based on mosaic analysis.
M02H5.4	WBGene00019742	nhr-202
M03B6.3	WBGene00010835	M03B6.3
M03E7.4	WBGene00019756	M03E7.4	M03E7.4 encodes a protein, predicted to be secreted, with one chitin-binding peritrophin-A and three low-density lipoprotein receptor domain class A domains; M03E7.4 has no obvious function in mass RNAi assays.	LDL receptor-related protein
M03F4.6	WBGene00019759	M03F4.6
M03F8.1	WBGene00019761	M03F8.1
M04C3.2	WBGene00010851	M04C3.2
M110.9	WBGene00010917	M110.9
M142.2	WBGene00000853	cut-6		cuticulin
M151.2	WBGene00019794	M151.2
M163.11	WBGene00044147	M163.11
M195.1	WBGene00000653	col-77	col-77 encodes a cuticular collagen; as loss of col-77 activity via RNAi screens results in no obvious defects, the precise role of col-77 in C. elegans development and/or behavior is not yet known.	cuticle collagen
M28.9	WBGene00010900	M28.9
R01H2.5	WBGene00019813	ger-1
R02D1.1	WBGene00003715	nhr-125
R02E4.1	WBGene00019826	R02E4.1
R03H4.6	WBGene00044617	bus-1	bus-1 is an uncloned gene required for colonization by Microbacterium nematophilum, and for the tail-swelling response to M. nematophilum infection.
R04B3.1	WBGene00019866	R04B3.1
R04B3.3	WBGene00019868	R04B3.3
R04B5.3	WBGene00011002	nhr-205		Zinc finger, C4 type (two domains)
R04D3.1	WBGene00011009	cyp-14A4	cyp-14A4 encodes one of ~80 C. elegans cytochrome P450s: membrane-associated, heme-containing NADPH-dependent monooxygenases that catalyze the oxidative metabolism of a variety of exogenous compounds and endogenous substrates.	cytochrome P450
R05C11.1	WBGene00019873	R05C11.1
R05D8.7	WBGene00019885	R05D8.7
R05F9.12	WBGene00019895	R05F9.12		glycosyl hydralase, sucrase-isomaltase
R05F9.5	WBGene00001757	gst-9	gst-9 encodes a predicted glutathione S-transferase; by homology, GST-9 is predicted to play a role in the detoxification of environmental toxins and xenobiotics by transferring glutathione to reactive electrophilic compounds; however, as loss of gst-9 activity via large-scale RNAi screens does not result in any obvious abnormalities, the precise role of GST-9 in C. elegans development and/or beh…	glutathione S-transferase
R07A4.4	WBGene00011075	R07A4.4
R07B1.5	WBGene00011077	R07B1.5
R07E3.6	WBGene00011107	R07E3.6
R08A2.5	WBGene00011136	R08A2.5
R08B4.1	WBGene00001690	grd-1	grd-1 encodes a hedgehog-like protein, with (from N- to C-terminus) a signal sequence, a Ground domain, an extended region of low-complexity sequence, and a Hint/Hog domain; GRD-1 is expressed in rectal cells; the Hint/Hog domain is predicted to cut GRD-1 into two halves and then covalently link cholesterol to the C-terminus of the Ground domain; the Ground domain is predicted to form a cysteine-…	groundhog
R08D7.7	WBGene00011147	R08D7.7		Carbohydrate kinase
R08E3.1	WBGene00019957	R08E3.1		LDL receptor-related protein
R09B5.7	WBGene00005611	srj-23		7TM chemoreceptor, srj family
R09D1.2	WBGene00011158	R09D1.2		chitinase
R09H10.5	WBGene00011182	R09H10.5		EGF domains
R102.1	WBGene00011288	R102.1
R105.1	WBGene00020084	R105.1
R10E9.3	WBGene00011215	R10E9.3
R10H1.5	WBGene00003542	nas-23	nas-23 encodes an astacin-like metalloprotease.
R11A5.7	WBGene00011235	R11A5.7		zinc carboxypeptidase
R11E3.1	WBGene00020003	R11E3.1		protein kinase
R13A1.5	WBGene00020043	R13A1.5
R13A5.4	WBGene00020048	lgc-12		ACHR
R13H4.3	WBGene00011262	pho-8		histidine acid phosphatase
R148.7	WBGene00020105	R148.7
R193.2	WBGene00020128	R193.2
R57.2	WBGene00020083	R57.2
T02B11.4	WBGene00020156	T02B11.4
T02D1.5	WBGene00004061	pmp-4	The pmp-4 gene encodes a homolog of human ALD, which when mutated leads to X-linked adrenoleukodystrophy (OMIM:300100).	ABC transporters
T02E9.2	WBGene00001716	grl-7	grl-7 encodes a hedgehog-like protein, with an N-terminal signal sequence, a central low-complexity region, and a C-terminal Ground-like (Grl) domain; GRL-7 is expressed in intestine, hypodermis, and seam cells; the Grl domain is predicted to form a cysteine-crosslinked protein involved in intercellular signalling, and it has subtle similarity to the N-terminal Hedge domain of HEDGEHOG proteins.
T02G5.6	WBGene00003420	msh-4	msh-4 is a partial duplication of the him-14 locus, which encodes the C. elegans MSH4 ortholog; as currently annotated in WormBase, msh-4 can encode a protein nearly identical to HIM-14 residues 631-737, differing only at three amino acids; msh-4(RNAi) results in no apparent defects.
T03G6.1	WBGene00020194	T03G6.1
T04B2.3	WBGene00011422	T04B2.3
T04B2.7	WBGene00011425	T04B2.7
T04H1.8	WBGene00011453	ugt-56		UDP-glucuronosyltransferase
T05F1.9	WBGene00011494	T05F1.9
T06A4.3	WBGene00020283	T06A4.3		carboxypeptidase
T06D8.10	WBGene00011530	T06D8.10		peroxidase
T06E4.7	WBGene00011534	T06E4.7
T07A5.3	WBGene00011556	T07A5.3		sodium/phosphate transporter protein
T07A9.1	WBGene00020295	pqbp-1.2	pqbp-1.2 encodes a protein that is related to human PQBP1 (polyglutamine binding protein 1, mutations in which cause X-linked mental retardation (OMIM:300463)), but which lacks the WW domain (WWD) which has been shown to interact with RNA polymerase II and NpwBP; a mutation in pqbp-1.2, tm3045, is viable and displays no defects in lipid metabolism.
T07F10.4	WBGene00011590	bus-19	bus-19 encodes an ancient but unfamiliar transmembrane protein required for colonization by Microbacterium nematophilum and the tail-swelling response to M. nematophilum infection, as well as for cuticle integrity and traction during movement, normal alae and body shape, dauer formation, normally rapid growth, and larval viability; BUS-19 (along with Y71A12C.2) is orthologous to human TMEM41A, an…	Human mRNA (KIAA0033) like protein
T07G12.3	WBGene00011594	T07G12.3
T08B1.1	WBGene00020340	T08B1.1		sugar transporter
T08B6.2	WBGene00020352	T08B6.2
T08D2.1	WBGene00011606	T08D2.1		emp24/gp25L/p24 family
T08D2.2	WBGene00011607	T08D2.2
T09A12.1	WBGene00020372	T09A12.1
T09B4.7	WBGene00020381	T09B4.7
T09F5.10	WBGene00011669	T09F5.10
T10B5.10	WBGene00020396	T10B5.10
T10E9.4	WBGene00020414	T10E9.4
T12A7.9	WBGene00185100	T12A7.9
T12B3.1	WBGene00020444	T12B3.1		phosphatase
T13A10.10	WBGene00000005	aat-4	aat-4 encodes a predicted amino acid transporter catalytic subunit; unlike catalytic subunits in other organisms, however, AAT-4 does not contain the highly conserved cysteine residue known to facilitate covalent interaction with a glycoprotein subunit, suggesting that AAT-4 does not require this residue for heterodimer formation or, alternatively, does not require the glycoprotein subunit for fu…
T13C2.2	WBGene00020478	T13C2.2
T13C5.7	WBGene00020487	T13C5.7
T13H5.2	WBGene00011756	ctg-2		retinal-binding like protein
T14B1.2	WBGene00000085	aex-2	aex-2 is genetically required for two different steps of normal defecation in the hermaphrodite digestive tract; since its mutant phenotype resembles that induced by ablation of the interneuron AVL and the motor neuron DVB, aex-2 is likely to be required for the function or activation of these neurons rather than for any of their specific neurotransmitter systems.	possible G protein coupled receptor
T14B4.5	WBGene00020501	T14B4.5
T14B4.6	WBGene00001064	dpy-2	The dpy-2 gene encodes an unusual cuticular collagen that is required for maintaining the normal body length of the animal in later larval stages; dpy-2 interacts with other cuticular collagens such as dpy-10 and sqt-1, and suppresses mutations in glp-1, mup-1, and emb-5.
T14B4.7	WBGene00001072	dpy-10	A cuticle collagen protein that afffects body morphology and movement and genetically interacts with the sqt-1 collagen gene.
T15B7.16	WBGene00020528	lgc-54		ligand-gated ionic channel protein
T16A9.5	WBGene00011795	T16A9.5
T16G1.2	WBGene00011796	T16G1.2
T16G1.5	WBGene00011799	T16G1.5
T16G1.6	WBGene00011800	T16G1.6
T16G1.8	WBGene00001711	grl-2	grl-2 encodes a hedgehog-like protein, with an N-terminal signal sequence, a central proline-rich low-complexity region, and a C-terminal Ground-like (Grl) domain; GRL-2 is expressed in neurons, amphid socket cells, and other cells; the Grl domain is predicted to form a cysteine-crosslinked protein involved in intercellular signalling, and it has subtle similarity to the N-terminal Hedge domain o…
T16G12.1	WBGene00011803	T16G12.1		Aminopeptidase
T16G12.7	WBGene00011808	T16G12.7		Protein phosphatase 1
T16H12.6	WBGene00002186	kel-10		MIPP repeats
T19A5.3	WBGene00020554	T19A5.3
T19B10.9	WBGene00011836	T19B10.9		max protein like
T19D12.9	WBGene00020583	T19D12.9		sodium/phosphate trasnsprter
T20D4.5	WBGene00020611	T20D4.5
T21C9.9	WBGene00011895	T21C9.9
T21F2.1	WBGene00020657	lgc-53		ligand-gated ionic channel
T21G5.1	WBGene00020659	T21G5.1		tyrosine-protein kinase
T21H3.2	WBGene00004230	ptr-16	ptr-16 encodes a nematode-specific member of the sterol sensing domain (SSD) proteins, distantly paralogous to Drosophila PATCHED (PTC) and human PTCH (OMIM:601309, mutated in basal cell nevus syndrome); PTR-16 is partially required for normal molting from L2 to L3 larval stages; however, PTR-16 and PTR-1 together are strongly required for both molting and viability, with double ptr-1/-16 RNAi an…
T22B11.2	WBGene00020676	T22B11.2
T22B3.1	WBGene00001079	dpy-20	dpy-20 encodes a BED zinc finger protein, with no known homologs outside of nematodes, that is required for normal body morphology.	DPY-20 protein
T22B3.2	WBGene00011910	T22B3.2
T22B3.3	WBGene00011911	T22B3.3
T22F3.8	WBGene00020698	T22F3.8
T23D5.6	WBGene00006085	str-18		7TM receptor
T23F2.1	WBGene00044623	bus-8	bus-8 encodes a glycosyltransferase related to mannosyltransferases that play a role in protein N-linked glycosylation ; bus-8 is required for colonization by Microbacterium nematophilum and the tail-swelling response to M. nematophilum infection; bus-8 is also essential for enclosure during embryonic morphogenesis, functioning in or with ephrin-mediated signaling to effect the proper neuroblast …	glycosyltransferase
T23F6.5	WBGene00011952	T23F6.5
T24C2.1	WBGene00004301	ram-5	ram-5 encodes a novel transmembrane protein; during male tail development, ram-5 activity is required in ray structural cells for proper sensory ray morphogenesis; a RAM-5::GFP fusion protein is expressed in all of the ray structural cells of the male tail, as well as additional sensory support cells in both hermaphrodites and males, including those of the inner labial sensilla as well as the ADE…	cuticlin like
T25C12.3	WBGene00012018	T25C12.3		EGF-repeats
T25C8.1	WBGene00012017	T25C8.1
T25E12.13	WBGene00012028	srz-99		DUF-216 family
T25G12.6	WBGene00020813	T25G12.6
T26C5.2	WBGene00012032	T26C5.2
T27C5.12	WBGene00044059	T27C5.12
T28F2.7	WBGene00020903	T28F2.7
T28F3.4	WBGene00012130	T28F3.4		Sugar (and other) transporters
T28F3.8	WBGene00012134	T28F3.8
T28H11.7	WBGene00020905	T28H11.7
W01A8.7	WBGene00044764	W01A8.7
W02G9.4	WBGene00020954	W02G9.4
W04G3.2	WBGene00012256	W04G3.2
W04G3.3	WBGene00012257	lpr-4
W04G3.8	WBGene00012261	lpr-3	W04G3.8 encodes a novel protein, conserved amongst nematodes; large-scale RNAi experiments indicate that W04G3.8 activity is required for normal growth rates, early larval development, and coordinated locomotion.
W05B2.7	WBGene00012273	W05B2.7
W06B3.1	WBGene00012295	W06B3.1
W06D12.5	WBGene00006685	twk-33
W06G6.9	WBGene00012311	W06G6.9
W07A12.7	WBGene00012324	rhy-1
W07A12.8	WBGene00012325	W07A12.8
W08G11.1	WBGene00012346	W08G11.1
W09C5.4	WBGene00002116	ins-33	ins-33 encodes an insulin-like peptide of the insulin superfamily of proteins (OMIM:176730, 147440); INS-33 is one of 38 insulin-like peptides in C. elegans; loss of INS-33 function can result in embryonic lethality, slow growth, and lack of coordination; additionally, INS-33 appears to be a direct downstream target of LIN-14, a nuclear protein and key regulator of the temporal sequence of postem…
W09G12.10	WBGene00044463	W09G12.10
Y102A5B.1	WBGene00013607	clec-27		Lectin C-type domain short and long forms (2 domains)
Y102A5B.2	WBGene00013608	clec-35		Lectin C-type domain short and long forms
Y102A5B.3	WBGene00013609	clec-37		Lectin C-type domain short and long forms
Y105C5B.18	WBGene00013657	Y105C5B.18
Y105C5B.2	WBGene00001549	gcy-25	gcy-25 encodes a predicted guanylate cyclase.
Y105C5B.6	WBGene00005726	srv-15		G-protein coupled receptor, srv family
Y11D7A.14	WBGene00012437	Y11D7A.14	Y11D7A.14 encodes a putative myosin, with an N-terminal myosin head motor domain and a C-terminal coiled-coil domain; Y11D7A.14 has no obvious function in mass RNAi assays.	Myosin head (motor domain)
Y11D7A.9	WBGene00012433	Y11D7A.9
Y17G7B.14	WBGene00012467	Y17G7B.14
Y18D10A.18	WBGene00012485	fbxa-121
Y18H1A.9	WBGene00021213	Y18H1A.9
Y22F5A.5	WBGene00003091	lys-2	lys-2 is one of ten C. elegans lysozyme genes; as such, lys-2 can be predicted to have a role in lysozymal function including immune function.
Y26D4A.4	WBGene00012502	clec-107
Y32B12A.3	WBGene00012518	Y32B12A.3
Y32F6A.5	WBGene00012530	Y32F6A.5
Y32F6B.2	WBGene00003570	ncx-5	ncx-5 encodes a putative 4Na[+]/1Ca[2+],1K[+] exchanger, orthologous to human SLC24A1-5 and paralogous to NCX-4; NCX-5 is predicted to export free cytoplasmic Ca[2+] with low affinity but high capacity, being complemented by low-capacity/high-affinity Ca[2+] ATPase pumps such as MCA-1/-3; NCX-5 has tandem Calx-alpha domains predicted to carry out ion transport; NCX-5 has no obvious function in ma…	NA(+)/Ca(2+),K(+)- exchanger
Y32G9A.6	WBGene00021304	Y32G9A.6
Y37E11AL.1	WBGene00021357	Y37E11AL.1
Y37E11B.10	WBGene00021381	Y37E11B.10
Y37F4.1	WBGene00021382	Y37F4.1
Y38A10A.2	WBGene00021389	Y38A10A.2
Y38E10A.5	WBGene00012583	clec-4
Y38F1A.3	WBGene00004232	ptr-18	ptr-18 encodes a nematode-specific member of the sterol sensing domain (SSD) proteins, distantly paralogous to Drosophila PATCHED (PTC) and human PTCH (OMIM:601309, mutated in basal cell nevus syndrome); PTR-18 is strongly required for normal molting from L3 to adult stage (a role conserved in C. briggsae); PTR-18 is also required for male tail development and vulval morphogenesis, and (partly) f…
Y39B6A.1	WBGene00012664	Y39B6A.1
Y39B6A.23	WBGene00012682	Y39B6A.23
Y39B6A.24	WBGene00012683	Y39B6A.24
Y39D8A.1	WBGene00021448	Y39D8A.1
Y39E4B.4	WBGene00006629	tsp-3		tetraspanin
Y40D12A.2	WBGene00021503	Y40D12A.2		serine carboxypeptidase
Y41D4B.17	WBGene00021519	Y41D4B.17
Y41E3.19	WBGene00044979	Y41E3.19
Y42A5A.2	WBGene00012777	lact-8	lact-8 encodes a beta-lactamase domain-containing protein that contains a predicted transmembrane domain in its N terminus.
Y42H9B.1	WBGene00000689	col-115
Y43E12A.3	WBGene00012795	Y43E12A.3		BTB (also known as BR-C/Ttk) domain.
Y43F8A.2	WBGene00012809	Y43F8A.2
Y43F8C.5	WBGene00012827	Y43F8C.5
Y44A6B.3	WBGene00012848	Y44A6B.3
Y45F10D.14	WBGene00012892	Y45F10D.14
Y46C8AL.2	WBGene00021580	clec-174
Y46C8AL.4	WBGene00021582	clec-71		clec family, C-type lectin
Y46C8AL.5	WBGene00021583	clec-72		clec family, C-type lectin
Y46G5A.22	WBGene00012912	Y46G5A.22
Y46G5A.29	WBGene00012917	Y46G5A.29
Y47D3A.10	WBGene00006553	tbx-34	tbx-34 encodes a diverged member of the T-box transcription factor family; by homology, TBX-34 is predicted to function as a transcriptional regulator during development, but as loss of tbx-34 activity via RNAi results in no obvious defects, the precise role of TBX-34 in C. elegans development and/or behavior is not yet known.
Y47D3B.1	WBGene00012939	Y47D3B.1
Y47D7A.13	WBGene00021625	Y47D7A.13
Y47D7A.5	WBGene00001714	grl-5	grl-5 encodes a hedgehog-like protein, with an N-terminal signal sequence, a central proline-rich low-complexity region, and a C-terminal Ground-like (Grl) domain; the Grl domain is predicted to form a cysteine-crosslinked protein involved in intercellular signalling, and it has subtle similarity to the N-terminal Hedge domain of HEDGEHOG proteins.
Y47H9C.1	WBGene00012947	Y47H9C.1
Y50D4B.3	WBGene00021742	Y50D4B.3
Y50D4B.4	WBGene00021743	Y50D4B.4
Y53C10A.3	WBGene00013134	Y53C10A.3	Y53C10A.3 encodes a paralog of HSF-1 that might regulate ubq-1, since ubq-1 has 5'-flanking sequences resembling heat shock regulatory elements, yet is uninduced by heat shock.
Y53F4B.25	WBGene00013171	Y53F4B.25
Y53F4B.27	WBGene00013173	Y53F4B.27
Y53G8AR.7	WBGene00021814	Y53G8AR.7
Y54F10BM.11	WBGene00021865	fbxa-66
Y54G2A.21	WBGene00021886	Y54G2A.21
Y55F3AM.2	WBGene00005903	srx-12		7TM chemoreceptor, srx family
Y57A10A.24	WBGene00013264	Y57A10A.24
Y57G11A.2	WBGene00013290	Y57G11A.2
Y57G11C.41	WBGene00013330	Y57G11C.41
Y57G11C.42	WBGene00013331	Y57G11C.42
Y57G7A.6	WBGene00021969	Y57G7A.6
Y65B4BL.1	WBGene00022033	Y65B4BL.1
Y65B4BR.2	WBGene00002393	lpr-1
Y65B4BR.6	WBGene00001725	grl-16	grl-16 encodes, by alternative splicing, two hedgehog-like proteins with an N-terminal signal sequence, a central proline-rich low-complexity region, and a C-terminal Ground-like (Grl) domain; the Grl domain is predicted to form a cysteine-crosslinked protein involved in intercellular signalling, and it has subtle similarity to the N-terminal Hedge domain of HEDGEHOG proteins.
Y67A10A.1	WBGene00013450	oac-56
Y67A10A.11	WBGene00044906	Y67A10A.11
Y67A10A.8	WBGene00013457	paqr-3
Y69A2AR.15	WBGene00022086	sprr-3
Y69E1A.1	WBGene00013473	Y69E1A.1
Y70D2A.1	WBGene00013496	Y70D2A.1		7 transmembrane receptor (rhodopsin family)
Y71A12B.13	WBGene00013510	Y71A12B.13
Y71G12B.25	WBGene00022160	Y71G12B.25
Y71G12B.32	WBGene00044349	Y71G12B.32
Y71H2AM.22	WBGene00006695	twk-45
Y73B6BL.26	WBGene00022247	lgc-10
Y73B6BL.31	WBGene00022252	Y73B6BL.31
Y73E7A.8	WBGene00022274	Y73E7A.8
Y75B8A.21	WBGene00013555	fbxa-89	This gene encodes a protein containing an F-box, a motif predicted to mediate protein-protein interactions either with homologs of yeast Skp-1p or with other proteins; this gene's encoded protein also contains an FTH/DUF38 motif, which may also mediate protein-protein interaction.
Y75B8A.3	WBGene00013540	Y75B8A.3		Carboxylesterases
Y82E9BL.4	WBGene00022321	fbxa-25
Y87G2A.15	WBGene00001704	grd-15	grd-15 encodes a hedgehog-like protein, with an N-terminal signal sequence and a C-terminal Ground domain; GRD-15 is expressed in amphid socket cells; the Ground domain is predicted to form a cysteine-crosslinked protein involved in intercellular signalling, and it has subtle similarity to the N-terminal Hedge domain of HEDGEHOG proteins; grd-15 has no obvious function in RNAi assays.
Y94H6A.2	WBGene00022375	Y94H6A.2
ZC123.1	WBGene00022517	ZC123.1
ZC13.3	WBGene00022504	ZC13.3
ZC155.2	WBGene00022530	ZC155.2
ZC250.3	WBGene00022577	ZC250.3
ZC317.3	WBGene00001593	glc-3	The glc-3 gene encodes a fipronil and BIDN-sensitive, but picrotoxinin-insensitive, L-glutamate-gated chloride channel subunit.	ligand-gated ionic channel subunit
ZC328.2	WBGene00022592	ZC328.2		zinc finger protein
ZC374.2	WBGene00013872	ZC374.2		Fibronectin type III domain (4 domains)
ZC416.6	WBGene00022610	ZC416.6		protease
ZC443.6	WBGene00013901	ugt-16		UDP-glucuronosyltransferase
ZC449.1	WBGene00022611	ZC449.1
ZC477.7	WBGene00022621	ZC477.7
ZC504.2	WBGene00000047	acr-8	acr-8 encodes an alpha subunit of nicotinic acetylcholine receptor (nAChR); ACR-8 falls into the 'ACR-8' class of nAChR subunits, which includes ACR-12 and ACR-13.	acetylcholine receptor protein
ZC513.3	WBGene00022628	ZC513.3
ZC581.6	WBGene00006625	try-7
ZC581.7	WBGene00022634	ZC581.7		protein-tyrosine kinase
ZK1025.7	WBGene00050875	bah-1
ZK1055.4	WBGene00022845	ZK1055.4
ZK112.6	WBGene00022662	ZK112.6
ZK1193.2	WBGene00022858	ZK1193.2
ZK1193.3	WBGene00022859	ZK1193.3
ZK1193.4	WBGene00022860	ZK1193.4
ZK1225.1	WBGene00014235	ZK1225.1
ZK1248.5	WBGene00022876	ZK1248.5
ZK1290.12	WBGene00006947	wrt-1		warthog gene
ZK154.1	WBGene00022665	ZK154.1
ZK180.5	WBGene00022679	ZK180.5
ZK228.4	WBGene00013947	ZK228.4
ZK265.5	WBGene00013957	sre-23		7TM receptor, sre family
ZK354.8	WBGene00022709	ZK354.8		protein phosphatase
ZK377.1	WBGene00006952	wrt-6	wrt-6 encodes a hedgehog-like protein, with (from N- to C-terminus) a signal sequence, a Wart domain, an short region of low-complexity sequence, and a Hint/Hog domain; WRT-6 is expressed in sheath and socket cells of anterior sensilla, seam cells, and hypodermis; the Hint/Hog domain is predicted to cut WRT-6 into two halves and then covalently link cholesterol to the C-terminus of the Wart domai…
ZK418.7	WBGene00022736	ZK418.7
ZK507.4	WBGene00013980	dos-1	dos-1 encodes an unfamilar protein with no clear orthologs outside of nematodes; DOS-1 is paralogous to OSM-7, K02F3.7, and ZK507.4, has a predicted signal sequence with 12 conserved cysteine residues, and may be secreted; DOS-1 has no obvious function in mass RNAi assays.
ZK596.3	WBGene00014008	ZK596.3
ZK616.10	WBGene00001223	ehn-3	ehn-3 encodes a nuclear Zn-finger protein with no obvious orthologs; EHN-3 controls development of somatic gonadal precursors (SGPs), and enables both HND-1 and TRA-1 functions in gonadogenesis; EHN-2 is expressed in SGP nuclei; ehn-3 expression is regulated by HND-1, while EHN-3 regulates tra-1 expression; enh-3(q689) homozygotes have mild defects in gonadogenesis, but double homozygotes also ca…
ZK617.2	WBGene00014009	lips-6
ZK622.2	WBGene00001806	gur-5
ZK643.1	WBGene00014033	ZK643.1
ZK643.8	WBGene00001734	grl-25	grl-25 encodes a putatively hedgehog-like protein, with an N-terminal signal sequence and an extended glycine-rich low-complexity region; GRL-25 is expressed in intestine and the nervous system.
ZK673.9	WBGene00014063	clec-143		Lectin C-type domain short and long forms, von Willebrand factor type A domain
ZK678.5	WBGene00006950	wrt-4	wrt-4 encodes a hedgehog-like protein, with (from N- to C-terminus) a signal sequence, a Wart domain, an short region of low-complexity sequence, and a Hint/Hog domain; WRT-4 is expressed strongly in hypodermal syncytia hyp6-hyp10 from 3-fold embryos to adults; the Hint/Hog domain is predicted to cut WRT-4 into two halves and then covalently link cholesterol to the C-terminus of the Wart domain; …	Hint module
ZK688.1	WBGene00022796	ZK688.1
ZK757.3	WBGene00006449	tag-76
ZK822.3	WBGene00003736	nhx-9	nhx-9 encodes a sodium/proton exchanger expressed intracellularly within the excretory cell, in distinct, large aggregates; nhx-9 has no known mutant or RNAi phenotype; NHX-9 is thought to prevent intracellular acidification by catalysing the electroneutral exchange of vesicular sodium for an intracellular proton.	Na(+)/H(+) antiporter
ZK822.5	WBGene00014092	ZK822.5		sodium/proline symporter like
ZK84.2	WBGene00022650	ZK84.2
ZK856.14	WBGene00044020	ZK856.14
ZK856.4	WBGene00014105	ZK856.4
ZK863.9	WBGene00044790	clec-224
ZK896.1	WBGene00014132	ZK896.1
ZK899.4	WBGene00006534	tba-8	tba-8 encodes a member of the alpha tubulin family with high similarity to the human tubulin alpha-6 chain; expressed in some neurons with occasional expression in the hypodermis.	tubulin alpha chain
ZK938.1	WBGene00014158	ZK938.1		serine/threonine protein phosphatase
ZK938.3	WBGene00014160	ZK938.3		calgranulin C calcium binding domains

## Sheet: TableS10C
Genes down-regulated by infection with bacterial pathogens (RNA-seq)
Pathogen	E. faecalis only	P. luminescens only	S. marcescens only	E. faecalis + P. luminescens	P. luminescens + S. marcescens	E. faecalis + S. marcescens	All three bacteria
Number of genes	306	359	797	190	109	96	141
	B0213.6	6R55.2	2RSSE.2	B0205.5	B0213.15	B0207.10	AH10.4
	B0238.15	B0034.7	4R79.2	B0213.4	B0563.9	B0213.17	B0205.12
	B0261.5	B0213.16	B0047.1	B0464.3	C01G5.7	B0496.7	B0213.2
	B0304.9	B0331.1	B0222.3	B0513.9	C02B4.4	C01G6.2	B0213.3
	B0348.2	B0524.2	B0240.2	B0563.8	C05E4.14	C06C6.8	B0284.3
	B0462.3	C01C4.2	B0261.6	C03G5.8	C06E1.5	C14C11.7	B0412.4
	B0495.6	C02B8.1	B0272.1	C04H5.1	C06E2.9	C16C2.1	C01B10.5
	B0507.4	C02F12.10	B0273.1	C05C8.8	C08E3.7	C18D11.6	C03G5.7
	C01F6.9	C03A7.12	B0273.3	C06C3.7	C08G5.7	C25B8.4	C06B8.8
	C02B10.2	C03A7.2	B0412.2	C06G3.11	C12D8.12	C25F9.13	C06G3.3
	C06E4.6	C03G5.11	B0414.1	C07D10.6	C12D8.9	C27A7.9	C08F11.11
	C07A4.3	C03G5.2	B0511.1	C07H6.2	C18A11.2	C38C10.6	C09H10.2
	C07A9.2	C04E6.10	B0513.3	C08B6.10	C23G10.10	C42C1.14	C14B9.10
	C07G1.7	C04F6.1	B0563.5	C08E3.13	C24B9.9	C43H6.8	C17F4.11
	C08E3.3	C05E4.3	B0564.3	C08F11.4	C26B2.4	C45B2.2	C18A3.9
	C08F11.17	C06B8.4	B0564.4	C10G8.4	C31A11.4	C45B2.8	C23G10.11
	C13D9.9	C06C6.2	BE10.3	C13F10.2	C31A11.6	C48B6.10	C24H11.5
	C13F10.1	C07G3.10	BE10.4	C14E2.2	C34D4.11	C50F2.9	C25A8.2
	C14A4.9	C07G3.6	C01B7.5	C17E7.12	C36B7.3	C51E3.10	C25H3.6
	C16C4.17	C08B6.1	C03B1.10	C23H5.3	C37H5.10	C54C8.12	C26F1.9
	C16C4.6	C08B6.2	C03B8.2	C26E1.1	C40H1.9	C54C8.7	C27A7.8
	C17C3.4	C08F11.12	C03C10.9	C27B7.9	C44B12.3	C54C8.9	C29F9.13
	C17F3.3	C08H9.4	C03G6.17	C31C9.7	C45E5.2	C54F6.15	C31H5.4
	C17F4.7	C09H10.1	C04C3.5	C33B4.4	C45G7.3	C54G7.1	C35C5.9
	C17H11.5	C10F3.7	C04F12.3	C33G8.3	C46H3.1	F08D12.11	C45B2.3
	C24H11.3	C10G8.7	C04F12.4	C35B1.3	C52G5.3	F10A3.6	C47E12.12
	C24H12.12	C12D8.6	C04F6.3	C35B1.4	D1007.18	F12E12.5	C49F5.7
	C24H12.8	C14F11.7	C04H5.3	C35D10.17	D2096.9	F13H10.6	C50F4.6
	C25A8.1	C15H7.4	C05B5.4	C36C5.12	E04A4.7	F19H6.3	C53C11.2
	C25E10.9	C16A11.8	C05E11.4	C36C5.5	F02E11.2	F25H5.8	C54F6.5
	C25F9.12	C16C8.17	C05E4.9	C39B10.6	F07C3.9	F26D11.12	C55A1.6
	C28H8.1	C16C8.7	C05E7.3	C44B11.6	F07G6.8	F26D11.13	E02H9.4
	C29E4.12	C16D9.5	C05G5.5	C46G7.1	F08G12.11	F30H5.2	E04F6.8
	C30F2.1	C17E7.1	C06A1.3	C48E7.10	F11E6.11	F31A9.2	F01F1.14
	C30G7.4	C18A3.7	C06E1.6	C48E7.11	F14D7.7	F36H5.11	F09F7.6
	C31A11.10	C18H7.9	C06E2.3	C54D2.6	F16B4.6	F38E11.2	F13H8.12
	C32B5.15	C23H5.1	C08A9.8	C54G6.5	F21C10.10	F41G4.1	F15E6.10
	C32B5.5	C24D10.2	C08B6.4	D1014.6	F22E5.7	F42D1.4	F15E6.3
	C32C4.5	C24G7.1	C08E3.6	D1025.9	F23D12.6	F45E12.6	F15E6.4
	C36B1.14	C25E10.2	C08E3.8	D1086.10	F26D10.12	F45E4.5	F15E6.8
	C36B7.1	C25E10.3	C08E8.11	D2096.13	F28D1.3	F46E10.8	F16B4.7
	C39B10.3	C27D6.12	C08F1.10	E04F6.9	F28D1.5	F48C1.9	F20D1.10
	C39E9.9	C28H8.8	C08F8.4	F02D10.1	F29C4.2	F48G7.9	F23A7.1
	C40A11.3	C29E4.14	C08F8.8	F08B6.2	F32A5.5	F53A9.6	F23A7.4
	C43F9.4	C29F9.2	C08F8.9	F09E5.14	F32H5.6	F53A9.7	F23B2.13
	C44B9.6	C30E1.3	C09C7.1	F10E9.11	F34D6.9	F53B6.8	F23D12.7
	C44E4.6	C30E1.6	C09F12.2	F10G7.11	F36G9.7	F55C9.14	F26E4.6
	C45G9.12	C31B8.12	C09F12.3	F11G11.13	F38E11.1	F58E1.8	F28F5.4
	C47D12.4	C31B8.2	C09H10.5	F12E12.1	F40G12.5	F59A7.4	F30A10.11
	C47E8.11	C32B5.17	C10A4.8	F13G3.10	F41C3.7	F59B10.2	F30A10.13
	C47G2.1	C32H11.3	C10C5.7	F13H10.8	F41G3.16	H04M03.2	F32D1.2
	C49D10.11	C34E11.4	C10G11.8	F14B8.4	F42A9.3	H06I04.7	F35C5.1
	C49H3.3	C35D10.3	C10G8.2	F15A4.10	F42F12.7	K04A8.8	F35H10.5
	C50F2.1	C35E7.7	C10G8.5	F15D3.5	F44B9.9	K05C4.3	F36H9.8
	C50F2.10	C36A4.11	C10H11.5	F18A11.3	F46B6.13	M163.3	F37C4.7
	C50F4.5	C38D9.6	C10H11.7	F22B3.1	F46C8.1	R09B3.3	F38E9.6
	C50F4.9	C39B5.10	C11E4.2	F23H11.5	F46F5.15	R09B5.2	F41E7.4
	C50F7.2	C39E9.5	C12D8.14	F26D2.12	F52D2.5	R09B5.3	F41E7.7
	C53A5.11	C40H1.2	C14A4.1	F28D1.11	F55B11.6	R09B5.9	F42A6.2
	C53B4.5	C40H1.5	C14B9.1	F28H6.8	H02I12.2	R11H6.4	F44E5.1
	C53B7.2	C44B11.4	C14C11.8	F33G12.7	H12I13.5	T08A9.6	F44E7.3
	C53C11.1	C44B12.9	C15F1.7	F36F12.4	H14A12.6	T10G3.6	F45F2.12
	C54C6.1	C44H9.1	C16C4.15	F37F2.2	H39E23.2	T12D8.10	F47G4.6
	C54G10.1	C45H4.10	C16D2.1	F37H8.5	H39E23.3	T23B3.2	F53C11.9
	D1007.19	C47A10.12	C17B7.10	F38C2.8	K03B8.11	T23E7.6	F56D6.10
	D2007.1	C47F8.7	C17C3.19	F40F8.3	K09H9.8	T23F2.3	F56D6.8
	D2024.1	C49A1.2	C17F3.1	F41E7.6	M03D4.3	T24F1.7	F56D6.9
	D2089.3	C49A1.5	C17F4.6	F41E7.8	R03A10.2	T28C6.10	F56E10.4
	E02C12.8	C50H2.6	C17G10.6	F41G3.1	R05D7.1	W03C9.5	F56H9.2
	E02H1.8	C53D6.8	C18C4.7	F42F12.8	R05H10.7	Y105C5A.13	F57B10.14
	EGAP2.2	C54F6.14	C18D4.3	F43D2.3	R08B4.4	Y105E8B.11	F58D5.2
	F02A9.3	C56A3.2	C18H2.1	F43G6.10	R09E10.8	Y116A8C.44	H06O01.4
	F02E11.4	D1025.6	C18H2.4	F44A6.3	R11G11.14	Y116F11A.1	H12I13.6
	F02H6.3	D1025.7	C18H7.1	F45E6.1	R31.3	Y23H5B.12	H34I24.1
	F08B4.3	D1025.8	C23G10.1	F45F2.13	T03F1.11	Y37D8A.6	H38K22.4
	F08F1.4	D1065.4	C24A11.1	F45F2.3	T08A9.10	Y37E11AL.2	JC8.14
	F09C12.6	E01G6.3	C24H12.1	F45F2.4	T08G5.12	Y38E10A.25	JC8.8
	F09E10.1	E02H9.1	C24H12.2	F45H11.2	T10B10.9	Y38H6C.15	K03H1.3
	F09E8.8	E03G2.1	C25A6.1	F49C12.13	T13F3.2	Y39G10AR.20	K03H1.4
	F09F3.7	E04F6.12	C25F9.2	F49F1.3	T20F10.4	Y41E3.22	K08E7.4
	F11D11.7	E04F6.7	C25G6.1	F53H2.2	T23B7.1	Y44E3A.3	K09F5.3
	F11G11.11	F02D10.2	C25G6.4	F55G1.10	T23E1.2	Y47H9B.2	K10C2.7
	F12A10.9	F02E11.5	C25H3.1	F55G1.11	T28F2.6	Y48G1C.9	K11G9.6
	F12E12.7	F07C4.11	C26F1.4	F55G1.2	W02D7.2	Y53C12A.7	M02E1.3
	F12E12.8	F07C4.12	C27A12.5	F56C3.8	W02D7.8	Y53F4B.17	M199.9
	F12E12.9	F07G6.5	C27A2.2	F57A8.8	W03G1.7	Y53F4B.24	R01B10.2
	F12F6.10	F08H9.3	C27D6.3	F57C2.4	W05B10.3	Y54G2A.5	R07C3.13
	F13A7.13	F09C12.7	C27D9.2	F58E10.5	W06G6.11	Y55B1AL.2	R09B3.2
	F13E6.3	F09C6.10	C27H5.6	F59D8.1	W10G11.1	Y63D3A.7	R11.4
	F14D2.7	F10A3.12	C28A5.4	K03A1.6	Y105C5A.17	Y71F9AL.7	R12B2.7
	F15D4.3	F10A3.4	C30B5.3	K06A9.3	Y105C5B.16	Y73B6BL.34	T05G5.4
	F15D4.6	F10D2.8	C30B5.7	K06B4.15	Y10G11A.2	Y82E9BL.5	T08G5.10
	F16H9.2	F10D7.4	C30G4.7	K06C4.10	Y41C4A.17	Y8G1A.1	T09A12.5
	F17E9.10	F10G7.7	C30G7.1	K07C11.3	Y43F8A.1	ZK177.9	T10B11.1
	F17E9.12	F10G8.4	C30H6.10	K07C11.7	Y48A6B.4	ZK470.6	T15B7.12
	F20A1.8	F13E9.6	C31H1.5	K07E8.9	Y50E8A.1	ZK75.2	T22G5.7
	F22B3.2	F15A4.1	C31H2.3	K07F5.16	Y51H4A.32		T24D8.3
	F22B7.2	F15D3.3	C32B5.1	K08D12.7	Y53F4A.2		T26H5.9
	F22E5.20	F15E11.12	C32B5.12	K09D9.11	Y57A10B.2		W01B6.7
	F22E5.4	F15E11.15	C32D5.4	K10B3.1	Y5F2A.2		W01D2.1
	F22F1.1	F16G10.15	C32E8.1	K11G12.3	Y97E10AL.1		W02D9.6
	F22F4.5	F17B5.1	C33A12.4	K12C11.6	Y9C9A.1		W02D9.7
	F26G1.2	F17C11.6	C33D9.5	M01D7.5	ZC334.10		W08A12.2
	F27B3.6	F18E9.7	C33H5.12	M02B7.7	ZC395.5		W08F4.11
	F28B4.1	F18E9.8	C34D1.1	M117.6	ZC84.7		W10G6.1
	F29B9.10	F19B10.7	C34E11.2	R01B10.1	ZK488.7		Y110A2AL.1
	F31D4.9	F21A3.4	C34F11.4	R09H10.6	ZK666.7		Y111B2A.2
	F31D5.6	F21C3.6	C34F11.6	R12B2.6	ZK673.1		Y17G7B.1
	F34H10.5	F21D9.8	C35A5.2	R13D11.10	ZK697.8		Y17G9B.2
	F35E2.5	F21F8.2	C35C5.8	R160.5			Y22D7AR.10
	F35E8.2	F21H7.3	C35D10.11	T01C3.11			Y37D8A.19
	F35G2.3	F22A3.6	C36B1.13	T04C12.8			Y37E11B.7
	F36A4.5	F22B8.5	C36B7.8	T04G9.7			Y38E10A.11
	F36D1.5	F23D12.11	C36C9.5	T05C1.2			Y38E10A.16
	F36H5.9	F25E5.13	C36F7.4	T07C4.5			Y39A3CL.3
	F37C12.17	F25E5.9	C37A2.7	T08A9.7			Y39A3CR.4
	F38A1.13	F26C11.4	C37A5.4	T08A9.9			Y39B6A.5
	F38A1.15	F26D11.9	C37C3.12	T10C6.12			Y40B10A.6
	F38C2.5	F28A12.4	C37C3.6	T10C6.13			Y41D4B.5
	F38C2.7	F28D1.4	C38C3.4	T10C6.14			Y43F8C.18
	F39E9.3	F28G4.1	C38D4.7	T10D4.13			Y43F8C.2
	F39E9.6	F28H1.2	C38D4.8	T20B3.14			Y45F10C.6
	F40B5.1	F29A7.4	C39B5.2	T21E8.5			Y51A2D.9
	F40G9.14	F29A7.8	C39E6.4	T21H3.5			Y53F4B.14
	F41C6.4	F29D10.1	C39E9.10	T22E5.1			Y54G9A.9
	F41G3.17	F31E8.1	C39E9.2	T23D8.5			Y57G11C.5
	F45C12.10	F31E9.1	C39F7.1	T23D8.6			Y57G11C.52
	F45C12.13	F32D8.9	C40A11.2	T23F2.5			Y68A4A.13
	F45D11.13	F32G8.5	C40C9.3	T24D3.2			Y69A2AR.3
	F45D3.1	F34D10.3	C41H7.4	W02D9.5			Y71F9AL.6
	F46F11.4	F36D4.6	C42C1.1	W04A8.2			Y71F9B.4
	F46G10.1	F36F12.5	C42C1.9	W06D11.2			Y71G12B.14
	F47E1.4	F36H9.4	C42D8.9	W10G11.2			Y71H2B.4
	F47G9.2	F37C4.2	C43D7.2	Y105E8B.6			Y73C8C.2
	F49B2.4	F38A1.6	C44B7.6	Y110A2AL.6			Y82E9BR.3
	F49C12.11	F38A5.6	C44H4.1	Y110A2AM.4			Y94H6A.12
	F49D11.3	F41H10.12	C45B2.4	Y11D7A.10			ZC373.2
	F49E12.2	F41H10.2	C45E5.3	Y18D10A.12			ZK287.8
	F49F1.14	F42C5.6	C45G7.2	Y32B12B.1			ZK520.5
	F49H12.2	F42F12.1	C46A5.4	Y32G9A.11			ZK652.2
	F52B11.6	F42F12.9	C46G7.5	Y32G9A.2			ZK813.2
	F52C6.6	F42G8.9	C46H11.9	Y37E3.3
	F53F1.1	F43C11.5	C47D12.3	Y38E10A.24
	F54B8.4	F46B3.9	C47D12.5	Y38F1A.1
	F54D12.1	F46B6.8	C47E8.3	Y38F1A.9
	F55A12.2	F47H4.4	C47E8.9	Y38H6C.4
	F55C9.5	F48D6.4	C49A1.4	Y40H7A.11
	F55G1.3	F48F7.3	C50E10.1	Y41E3.12
	F56D6.5	F49E11.10	C50F7.1	Y43F4B.10
	F58A3.4	F52D2.9	C51E3.2	Y43F8B.10
	F58E1.10	F53B1.9	C52A10.2	Y44A6D.1
	F58F12.2	F53C3.8	C52A11.2	Y44A6D.2
	F59A6.12	F53F1.6	C52D10.13	Y45F10C.4
	F59E11.13	F53F4.13	C52E4.7	Y46H3C.4
	H09G03.1	F53F4.8	C53B7.5	Y47D3A.20
	H10D18.2	F53G12.11	C53C9.2	Y47D9A.4
	H12D21.4	F54B11.11	C53D5.2	Y48A5A.3
	H23N18.5	F54B8.1	C53D5.3	Y51A2D.10
	K02E7.12	F54D12.3	C53H9.1	Y51H7C.8
	K04F1.9	F54D12.9	C53H9.3	Y53F4B.37
	K04G2.10	F54F2.6	C54C6.5	Y54G2A.38
	K06A4.7	F55C7.2	C54E4.1	Y54G2A.44
	K07A1.13	F55C9.6	C54G4.4	Y57G7A.2
	K08B4.7	F55E10.4	C54G6.3	Y59E9AL.1
	K08D10.12	F55E10.6	C55C2.1	Y59E9AR.4
	K08D8.1	F56D6.12	C55C3.3	Y60A3A.21
	K08E3.10	F58B3.3	C56G7.2	Y60A3A.23
	K08H2.4	F58D7.1	D1054.9	Y62H9A.3
	K09C6.3	F58E1.4	D1065.1	Y62H9A.5
	K09H11.9	F58E2.5	D2030.4	Y67D8C.8
	K11H3.6	F59A1.13	D2063.4	Y69A2AR.28
	K12H4.6	F59D6.1	D2096.10	Y69F12A.3
	M01D1.8	F59D6.2	E01G6.1	Y73B6BL.32
	M01D7.9	H01M10.2	E02H9.6	Y75B8A.10
	M02H5.8	H10D12.2	E04A4.6	Y75B8A.11
	M04D5.3	H10D18.6	EEED8.7	Y7A5A.10
	M151.8	H32K16.2	EGAP1.1	Y7A5A.8
	R02C2.1	H39E20.1	EGAP5.1	Y92C3B.1
	R03A10.1	K01B6.4	E_BE45912.2	ZC190.10
	R03G8.4	K01D12.1	F01E11.1	ZC334.11
	R06A4.6	K02E11.7	F07E5.2	ZK1098.11
	R07C3.15	K02E11.9	F07F6.6	ZK131.10
	R08C7.1	K03A11.2	F08D12.12	ZK1320.13
	R08H2.10	K03B8.5	F08D12.3	ZK381.8
	R09B3.5	K03B8.7	F08D12.6	ZK384.2
	R09B5.8	K03D3.2	F08F3.10	ZK39.6
	R09F10.9	K03D3.5	F08G12.8	ZK39.7
	R10D12.9	K03H6.7	F09C3.4	ZK632.9
	T04B8.3	K04A8.10	F09C6.12	ZK688.4
	T04D3.8	K04A8.5	F09C6.14	ZK813.3
	T06H11.5	K04F1.3	F09C6.3
	T08D10.4	K05F6.10	F09E10.6
	T09E8.4	K06B4.8	F09E10.7
	T10C6.11	K07A9.4	F10D2.6
	T10C6.4	K07F5.1	F10D7.3
	T11F9.5	K07F5.2	F10E7.11
	T13C5.2	K07F5.4	F10E9.2
	T14F9.5	K07H8.7	F10G7.6
	T14G10.4	K08B4.6	F11A5.3
	T19B4.4	K08F9.1	F11A5.9
	T19E7.6	K09C4.6	F11C7.2
	T20C4.1	K09D9.8	F11C7.3
	T20G5.12	K11D12.6	F11C7.4
	T22F3.12	K12B6.5	F11F1.6
	T24B8.5	K12C11.7	F11G11.4
	T24D8.4	K12H6.4	F11G11.8
	T24H10.6	K12H6.8	F13B12.3
	T25C12.2	K12H6.9	F13B12.5
	T25C12.4	M04D8.1	F13C5.5
	T25E12.11	M176.10	F13E9.12
	T26C11.3	R01B10.3	F13E9.15
	T26C11.8	R03H10.4	F13E9.5
	T26E3.5	R04A9.6	F14D2.14
	T26E4.4	R05D8.11	F14D2.5
	T26H2.6	R07C12.3	F14F3.1
	T27A1.1	R09B5.10	F14H12.1
	T28A11.15	R09D1.11	F14H12.6
	T28A11.6	R09H10.1	F14H8.6
	T28A11.7	R09H10.3	F15A4.12
	W01G7.3	R09H10.7	F15A4.13
	W02D7.9	R102.9	F17E9.1
	W03A5.3	R10D12.7	F17E9.3
	W03F11.1	R186.2	F18C5.4
	W03H9.2	R52.7	F18C5.9
	W04E12.4	R90.4	F18E2.4
	W05B2.6	T01B4.3	F18E9.6
	W08E3.4	T01E8.9	F19G12.3
	W09G10.1	T02B11.8	F20A1.2
	W09G12.10	T02B5.3	F20B10.3
	W09G12.4	T02D1.7	F20B6.7
	Y102E9.3	T02H6.6	F20C5.5
	Y105C5A.9	T03E6.3	F21A10.4
	Y116A8C.17	T03E6.5	F21D9.5
	Y116A8C.29	T03E6.8	F21E9.2
	Y116A8C.42	T04A11.12	F21H7.2
	Y119D3B.15	T05C1.5	F22B5.3
	Y119D3B.21	T05C3.8	F22B5.4
	Y25C1A.6	T05E12.3	F22B7.4
	Y37E3.4	T05E7.1	F22E10.3
	Y37H2A.10	T07C4.4	F23A7.8
	Y38E10A.10	T07H3.3	F23D12.3
	Y38E10A.12	T08A9.8	F23D12.5
	Y38H6C.1	T08G5.1	F23F1.2
	Y39A3A.5	T09F5.9	F23F12.8
	Y39A3CR.8	T10B11.4	F23F12.9
	Y39C12A.5	T10B5.7	F23H12.9
	Y39G10AL.1	T11F9.19	F25H5.7
	Y39G10AR.15	T12A7.3	F25H8.5
	Y45F10A.5	T14D7.3	F26A1.3
	Y45G5AM.5	T14E8.2	F26A10.1
	Y46E12A.4	T18H9.4	F26D11.4
	Y46G5A.20	T19C3.7	F26E4.2
	Y48G8AL.12	T19C3.9	F26F12.4
	Y49E10.15	T20D3.1	F27C1.10
	Y49E10.22	T20D4.15	F27E11.3
	Y49E10.27	T20D4.19	F28C6.7
	Y49F6B.12	T20H9.2	F28D1.7
	Y49F6B.7	T22F3.5	F28F8.2
	Y49G5A.1	T24F1.4	F28F8.3
	Y4C6A.4	T24F1.5	F28F8.8
	Y51A2D.11	T25B9.12	F28F9.2
	Y51H7BR.8	T26A8.3	F28F9.3
	Y51H7C.1	T26E3.1	F28F9.4
	Y52E8A.1	T26E3.6	F29A7.2
	Y54G2A.19	T26H5.5	F29F11.5
	Y56A3A.29	T26H5.8	F29G9.1
	Y57A10A.9	T27B7.5	F30H5.3
	Y57G11C.46	T27E4.6	F31E3.6
	Y57G7A.1	T28A11.2	F31E8.3
	Y59E1A.1	W02D7.11	F32B6.6
	Y5H2A.3	W02D7.12	F32H2.9
	Y5H2B.3	W02D7.4	F33A8.9
	Y66A7A.7	W03F8.2	F33D11.8
	Y66H1A.3	W03G1.2	F33D4.3
	Y67D8C.7	W04G5.6	F33H1.6
	Y71D11A.2	W06G6.1	F35A5.2
	Y71H2AM.22	W06H8.4	F35C11.2
	Y71H2B.1	W09G12.6	F35E12.2
	Y73B3B.3	W10G11.3	F36A2.10
	Y73F8A.22	Y105C5B.17	F36A2.14
	Y74C9A.2	Y108F1.5	F36A2.6
	Y75B12B.11	Y113G7A.16	F36A4.4
	Y7A5A.9	Y19D2B.2	F36D1.4
	Y82E9BR.22	Y22D7AL.3	F36D3.9
	Y8A9A.5	Y26D4A.12	F36G3.3
	ZC132.2	Y27F2A.8	F36H5.3
	ZC204.10	Y34F4.2	F36H5.4
	ZC239.20	Y37E11AL.9	F36H5.8
	ZC373.6	Y38E10A.9	F37B1.3
	ZC477.10	Y38H6C.18	F37C12.11
	ZC513.12	Y38H6C.19	F38B2.6
	ZC513.8	Y38H6C.21	F39C12.4
	ZK1010.6	Y38H6C.22	F39H12.4
	ZK1251.2	Y38H6C.23	F40C5.3
	ZK1251.7	Y39G8B.3	F40E10.1
	ZK287.3	Y43F8C.17	F40E10.5
	ZK287.9	Y45F10D.16	F40E3.5
	ZK525.1	Y45F10D.2	F40G9.2
	ZK616.2	Y46E12BL.1	F40G9.6
	ZK652.3	Y46E12BR.1	F40H3.6
	ZK666.11	Y46G5A.23	F40H6.6
	ZK678.6	Y47H9C.15	F40H7.12
	ZK813.1	Y48G9A.7	F41D9.5
	ZK816.3	Y49F6B.13	F41E6.15
	ZK863.2	Y49F6B.6	F41G3.21
	ZK899.5	Y50E8A.2	F41G4.7
		Y51H4A.5	F42A10.7
		Y51H7BR.5	F42G9.4
		Y54E10BL.3	F43B10.1
		Y54F10AM.1	F43C1.1
		Y54G11A.9	F43C1.7
		Y54G2A.10	F43C11.1
		Y54G2A.27	F43C11.7
		Y54G2A.42	F43G9.6
		Y57G7A.3	F44F1.6
		Y57G7A.7	F44F4.10
		Y60A9A.1	F45C12.2
		Y64G10A.10	F45D11.10
		Y66A7A.1	F45E4.7
		Y67A6A.1	F45G2.2
		Y69A2AR.4	F46B3.7
		Y71A12B.8	F46C5.1
		Y71A12C.1	F46C5.3
		Y71H9A.1	F46C5.4
		Y73B6A.2	F46E10.2
		Y73B6BL.35	F46G11.1
		Y73C8C.9	F46H5.5
		Y76B12C.4	F47B7.7
		Y7A5A.11	F47B8.2
		Y7A5A.2	F47B8.7
		Y7A5A.6	F47C12.1
		Y80D3A.11	F47C12.2
		Y82E9BL.3	F47E1.1
		Y82E9BR.7	F47E1.3
		Y9C9A.16	F48C1.8
		ZC15.10	F48C11.2
		ZC196.4	F48D6.3
		ZC239.17	F48G7.2
		ZC266.1	F49B2.7
		ZC487.4	F49E10.2
		ZK1290.1	F49E11.3
		ZK1321.1	F49E12.10
		ZK218.1	F49H12.7
		ZK262.4	F52C6.12
		ZK355.3	F52F12.2
		ZK380.4	F52H3.6
		ZK39.2	F52H3.7
		ZK39.3	F53A2.6
		ZK488.10	F53A3.3
		ZK512.7	F53A9.3
		ZK550.2	F53A9.8
		ZK673.5	F53C11.6
		ZK697.14	F53C3.6
		ZK809.8	F53F4.15
		ZK816.1	F53F4.17
		ZK816.5	F53F8.6
		ZK836.3	F53G12.4
		ZK849.5	F53G12.9
		ZK856.7	F53G2.1
			F53G2.2
			F53G2.3
			F54A3.4
			F54D8.1
			F54F12.1
			F54G2.2
			F55A3.5
			F55A3.6
			F55A4.3
			F55C10.5
			F55C9.4
			F55C9.8
			F55G1.1
			F56A12.1
			F56B3.6
			F56D2.3
			F56D5.1
			F56F11.5
			F56H11.3
			F56H6.2
			F57G4.8
			F57H12.5
			F58E6.10
			F58E6.3
			F58F6.2
			F58G4.1
			F59A6.10
			F59A7.12
			F59B1.4
			F59B10.3
			F59E12.12
			H01G02.1
			H02I12.4
			H04J21.1
			H14A12.7
			H23L24.1
			H23L24.2
			H23L24.5
			H23N18.6
			H24O09.2
			H27M09.4
			H32C10.1
			H35N09.1
			K01A11.3
			K01A2.10
			K01A2.2
			K01A2.3
			K01A2.4
			K01A2.7
			K01D12.5
			K01H12.1
			K02A6.2
			K02B12.4
			K02B7.4
			K03A1.4
			K03B4.4
			K03B4.7
			K03H1.12
			K04A8.2
			K04G11.2
			K04H4.1
			K04H4.2
			K05F6.3
			K05F6.6
			K06A1.1
			K06A1.3
			K06A4.2
			K06A9.2
			K07A1.6
			K07A1.7
			K07A12.3
			K07A12.6
			K07H8.11
			K08A2.2
			K08C7.4
			K08C7.5
			K08D12.4
			K08F11.1
			K08F4.12
			K09A11.4
			K09A11.5
			K09C4.4
			K09C8.2
			K09E4.1
			K09F6.8
			K09H11.11
			K10C9.1
			K10D2.4
			K10D3.4
			K11H12.1
			K11H12.6
			K12D12.3
			K12G11.2
			K12G11.3
			K12G11.6
			M01D1.10
			M01H9.3
			M02B7.6
			M02G9.1
			M02G9.2
			M03E7.4
			M04D8.2
			M04D8.3
			M117.3
			M117.4
			M195.2
			M199.8
			M28.1
			M28.5
			M60.4
			M60.7
			M88.3
			R01H2.4
			R02C2.2
			R02C2.6
			R02C2.7
			R02E12.4
			R02E12.6
			R02F11.1
			R04B5.6
			R05A10.1
			R06C1.6
			R06C7.10
			R06F6.6
			R06F6.7
			R07B1.8
			R07B1.9
			R07B5.7
			R07C12.1
			R07C3.11
			R07E3.2
			R08A2.7
			R08B4.5
			R08C7.13
			R08F11.7
			R09E10.5
			R09H3.3
			R102.2
			R10D12.10
			R10E4.2
			R10H10.4
			R11G1.1
			R11G10.2
			R12A1.3
			R12C12.3
			R13A5.11
			R13D7.7
			R13G10.4
			R53.8
			T01C3.6
			T01D1.6
			T01G9.1
			T02C5.3
			T03D8.5
			T03D8.7
			T03G11.5
			T04C9.4
			T04D1.2
			T04H1.1
			T04H1.3
			T04H1.6
			T05A10.2
			T05A7.11
			T05A7.2
			T05A7.7
			T05B4.11
			T05B4.3
			T05F1.5
			T05G5.10
			T05G5.12
			T06A10.2
			T06D8.3
			T06G6.12
			T07A5.5
			T07A9.9
			T07C4.2
			T07D10.2
			T07D10.6
			T07G12.8
			T08A9.5
			T08B1.2
			T08B2.10
			T08D2.8
			T08E11.6
			T09B4.5
			T09B4.6
			T09B9.3
			T09H2.1
			T10B10.6
			T10B9.8
			T10B9.9
			T10E10.4
			T10G3.4
			T10H4.11
			T13A10.11
			T13A10.2
			T13B5.4
			T13F2.8
			T13F3.7
			T14G12.4
			T16A1.8
			T17A3.1
			T17A3.10
			T17A3.12
			T18D3.4
			T18D3.5
			T19D7.6
			T19H12.1
			T19H12.6
			T19H5.2
			T20B3.7
			T20B5.2
			T20D4.7
			T20H4.2
			T21E8.1
			T22A3.8
			T22B7.5
			T22F3.10
			T22G5.4
			T22H6.3
			T23F2.4
			T23F6.1
			T23F6.3
			T24C4.2
			T24D8.5
			T24E12.11
			T25G12.2
			T26C12.3
			T26H2.1
			T26H2.10
			T27A3.3
			T27A3.8
			T27E4.4
			T27E9.2
			T27F6.8
			T28B8.5
			T28D9.9
			T28F2.8
			T28F4.2
			T28H10.4
			VH15N14R.1
			W01B11.2
			W01D2.6
			W02A2.3
			W02A2.9
			W02B12.3
			W02C12.1
			W02D3.6
			W03A3.1
			W03B1.1
			W03D8.3
			W03F11.4
			W03F8.6
			W03F9.4
			W03G1.5
			W04B5.2
			W04C9.3
			W06A7.5
			W06G6.10
			W07B8.4
			W07E6.3
			W07G1.6
			W08D2.6
			W08F4.5
			W09G12.7
			W09H1.3
			W10C4.1
			W10C8.4
			W10C8.6
			Y102A11A.7
			Y105C5B.11
			Y105C5B.29
			Y106G6H.3
			Y106G6H.8
			Y110A2AL.3
			Y110A2AL.4
			Y110A2AL.9
			Y110A2AM.1
			Y11D7A.3
			Y17D7B.3
			Y17G7B.22
			Y17G9A.1
			Y17G9B.1
			Y17G9B.7
			Y1A5A.1
			Y1H11.2
			Y22D7AR.5
			Y23B4A.1
			Y23H5A.2
			Y23H5A.4
			Y24F12A.3
			Y25C1A.2
			Y27F2A.5
			Y32G9A.10
			Y37E11B.1
			Y37E11B.10
			Y37E3.7
			Y38E10A.13
			Y38E10A.15
			Y38E10A.26
			Y38F1A.4
			Y38F2AL.2
			Y38H6A.2
			Y38H6C.5
			Y38H8A.5
			Y39A1A.20
			Y39A1B.2
			Y39A3A.3
			Y39D8B.1
			Y39E4B.11
			Y39E4B.13
			Y39G10AR.5
			Y39H10A.1
			Y39H10A.2
			Y40B10A.1
			Y40B1A.1
			Y41C4A.10
			Y41D4A.2
			Y41D4A.3
			Y41D4B.1
			Y41D4B.10
			Y41D4B.6
			Y43F8B.9
			Y46B2A.1
			Y46C8AR.1
			Y46E12A.1
			Y46G5A.24
			Y46G5A.42
			Y46G5A.43
			Y46H3C.5
			Y46H3C.6
			Y46H3D.1
			Y47D3A.30
			Y47D3B.6
			Y47G6A.13
			Y47H10A.1
			Y48A6A.1
			Y48B6A.10
			Y48B6A.2
			Y48G1BL.1
			Y48G1BM.8
			Y48G9A.10
			Y49F6B.10
			Y4C6B.3
			Y51A2D.14
			Y51H4A.4
			Y51H4A.9
			Y51H7BR.3
			Y53C12B.6
			Y53F4B.11
			Y53F4B.20
			Y53H1A.4
			Y53H1B.1
			Y54E2A.1
			Y54G11A.14
			Y55F3C.4
			Y56A3A.18
			Y56A3A.33
			Y57A10A.26
			Y57G11C.499
			Y57G7A.8
			Y58G8A.5
			Y59H11AM.1
			Y60A3A.15
			Y60C6A.1
			Y62E10A.1
			Y62H9A.13
			Y63D3A.11
			Y63D3A.2
			Y63D3A.3
			Y66D12A.14
			Y66D12A.22
			Y69A2AL.1
			Y71F9AL.2
			Y71F9AR.4
			Y71F9B.8
			Y71H2AL.2
			Y73B3A.18
			Y73B6BL.12
			Y73B6BL.42
			Y73C8B.5
			Y73F4A.2
			Y73F4A.3
			Y75B7AR.1
			Y75B8A.23
			Y75B8A.34
			Y77E11A.10
			Y77E11A.14
			Y77E11A.6
			Y7A9D.1
			Y80D3A.10
			Y80D3A.7
			Y82E9BR.1
			Y82E9BR.17
			Y82E9BR.6
			Y87G2A.12
			Y87G2A.16
			Y87G2A.19
			Y95B8A.4
			Y9D1A.1
			ZC116.3
			ZC132.4
			ZC15.8
			ZC204.13
			ZC21.10
			ZC21.3
			ZC334.1
			ZC334.9
			ZC412.6
			ZC455.1
			ZK1010.1
			ZK1010.4
			ZK1067.7
			ZK112.5
			ZK1225.6
			ZK1236.9
			ZK1248.2
			ZK1251.11
			ZK1320.5
			ZK265.4
			ZK455.2
			ZK512.4
			ZK512.8
			ZK512.9
			ZK546.6
			ZK652.1
			ZK662.2
			ZK666.6
			ZK75.1
			ZK75.3
			ZK792.4
			ZK863.5
			ZK896.8
			ZK909.4
			ZK909.5
			ZK930.4
			ZK930.6
			ZK970.8

## Sheet: TableS10D
Genes down-regulated by infection with all three bacterial pathogens (RNA-seq)
Gene sequence name	Gene WB ID	Gene Public Name	Gene Description (Concise)	CDS Description
AH10.4	WBGene00007085	AH10.4
B0205.12	WBGene00044413	B0205.12
B0213.2	WBGene00003765	nlp-27	nlp-27 encodes a predicted neuropeptide with homology to C. elegans nlp-28 through nlp-31.
B0213.3	WBGene00003766	nlp-28
B0284.3	WBGene00007133	B0284.3
B0412.4	WBGene00004498	rps-29	rps-29 encodes a small ribosomal subunit S29 protein; by homology, RPS-29 is predicted to function in protein biosynthesis; in C. elegans, RPS-29 activity is broadly required for embryonic and germline development, normal body coloration and morphology, normal postembryonic growth rates, and the overall health of the animal.	40S ribosomal protein S29
C01B10.5	WBGene00001858	hil-7	hil-7 encodes a histone H1.1 isoform that is required in the germline for chromatin silencing (assayed by silencing of transgenic DNA), for proliferation and differentiation, and for fertility; hil-7(RNAi) phenotypes resemble the Mes phenotype resulting from the desilencing of genes required for somatic differentiation in the germline; HIL-7 is required in both the hermaphrodite and the male germ…
C03G5.7	WBGene00001448	flp-5	flp-5 encodes a predicted FMRFamide-like peptide neurotransmitter that increases action potential frequency in the pharyngeal muscle when applied to the pharynx of dissected worms; expressed in the sensory neurons ASE and PVM.
C06B8.8	WBGene00004452	rpl-38	rpl-38 encodes a large ribosomal subunit L38 protein.
C06G3.3	WBGene00015549	C06G3.3
C08F11.11	WBGene00007458	C08F11.11
C09H10.2	WBGene00004454	rpl-41	rpl-41 encodes a large ribosomal subunit L41 protein; by homology, RPL-41 is predicted to function in protein biosynthesis.	60S ribosomal protein
C14B9.10	WBGene00015755	C14B9.10
C17F4.11	WBGene00044373	C17F4.11
C18A3.9	WBGene00015945	C18A3.9
C23G10.11	WBGene00016017	C23G10.11
C24H11.5	WBGene00007702	C24H11.5
C25A8.2	WBGene00016083	C25A8.2
C25H3.6	WBGene00016115	C25H3.6
C26F1.9	WBGene00004453	rpl-39	rpl-39 encodes a large ribosomal subunit L39 protein.	ribosomal protein L39
C27A7.8	WBGene00007758	C27A7.8
C29F9.13	WBGene00016227	nhr-280
C31H5.4	WBGene00007855	C31H5.4
C35C5.9	WBGene00007958	C35C5.9
C45B2.3	WBGene00016660	C45B2.3
C47E12.12	WBGene00008155	C47E12.12
C49F5.7	WBGene00008211	C49F5.7
C50F4.6	WBGene00001910	C50F4.6	his-36 encodes an UNSPECIFIED histone.
C53C11.2	WBGene00016900	C53C11.2
C54F6.5	WBGene00016923	C54F6.5
C55A1.6	WBGene00008323	C55A1.6
E02H9.4	WBGene00017102	E02H9.4
E04F6.8	WBGene00017127	E04F6.8
F01F1.14	WBGene00017168	F01F1.14
F09F7.6	WBGene00017303	F09F7.6
F13H8.12	WBGene00017444	F13H8.12
F15E6.10	WBGene00044479	F15E6.10
F15E6.3	WBGene00017484	F15E6.3
F15E6.4	WBGene00017485	F15E6.4
F15E6.8	WBGene00017488	dct-7
F16B4.7	WBGene00017509	F16B4.7
F20D1.10	WBGene00008980	tag-299
F23A7.1	WBGene00009067	F23A7.1
F23A7.4	WBGene00009069	F23A7.4		glutamate receptor epsilon subunit like
F23B2.13	WBGene00009078	rpb-12		RNA polymerases I, II and III shared polypeptide (approx 7kd)
F23D12.7	WBGene00009091	F23D12.7
F26E4.6	WBGene00009161	F26E4.6		cytochrome C oxidase
F28F5.4	WBGene00043297	F28F5.4
F30A10.11	WBGene00009268	F30A10.11
F30A10.13	WBGene00044680	F30A10.13
F32D1.2	WBGene00017982	F32D1.2		ATP synthase epsilion chain
F35C5.1	WBGene00009390	F35C5.1
F35H10.5	WBGene00018070	F35H10.5
F36H9.8	WBGene00018116	F36H9.8
F37C4.7	WBGene00018147	F37C4.7
F38E9.6	WBGene00018188	F38E9.6
F41E7.4	WBGene00009620	fip-5
F41E7.7	WBGene00009623	F41E7.7
F42A6.2	WBGene00018324	F42A6.2
F44E5.1	WBGene00009688	F44E5.1
F44E7.3	WBGene00018425	F44E7.3
F45F2.12	WBGene00001882	his-8	his-8 encodes an H2B histone; his-8 is contained within the histone gene cluster HIS2.	histone H2B
F47G4.6	WBGene00009827	F47G4.6
F53C11.9	WBGene00044921	F53C11.9	F53C11.9 encodes a putative secreted TIL-domain protease inhibitor paralogous to SWM-1, ISL-1, and the products of 11 other C. elegans genes; F53C11.9 and its relatives are collectively similar to other TIL-domain protease inhibitors from nematodes, insects, and vertebrates.
F56D6.10	WBGene00044472	dct-8
F56D6.8	WBGene00044292	F56D6.8
F56D6.9	WBGene00044471	F56D6.9
F56E10.4	WBGene00004496	rps-27	rps-27 encodes a small ribosomal subunit S27 protein.	ribosomal protein
F56H9.2	WBGene00010174	F56H9.2
F57B10.14	WBGene00019007	F57B10.14
F58D5.2	WBGene00010242	F58D5.2
H06O01.4	WBGene00010371	H06O01.4
H12I13.6	WBGene00019194	H12I13.6
H34I24.1	WBGene00019260	H34I24.1
H38K22.4	WBGene00010429	H38K22.4
JC8.14	WBGene00044737	ttr-45
JC8.8	WBGene00010440	ttr-51		Transthyretin-like family
K03H1.3	WBGene00010538	ttr-3	K03H1.3 encodes a protein containing a predicted signal sequence followed by a transthyretin-like domain; the product of K03H1.3 belongs to a family of apparently nematode-specific proteins whose function is not yet known.	Transthyretin-like family
K03H1.4	WBGene00010539	ttr-2	K03H1.4 encodes a protein containing a predicted signal sequence followed by a transthyretin-like domain; the product of K03H1.4 belongs to a family of apparently nematode-specific proteins whose function is not yet known.	Transthyretin-like family
K08E7.4	WBGene00010672	K08E7.4
K09F5.3	WBGene00004999	spp-14
K10C2.7	WBGene00019622	K10C2.7
K11G9.6	WBGene00003473	mtl-1	mtl-1 encodes one of two C. elegans metallothioneins, small, cysteine-rich, metal-binding proteins; MTL-1 functions in metal detoxification and homeostasis and in stress adaptation; in addition, mtl-1 plays a role in regulating growth and fertility; mtl-1 is constitutively expressed in the terminal bulb of the pharynx and expression is induced in larval intestinal cells following exposure to cadm…
M02E1.3	WBGene00023458	M02E1.3
M199.9	WBGene00044998	M199.9
R01B10.2	WBGene00019804	R01B10.2
R07C3.13	WBGene00019929	R07C3.13
R09B3.2	WBGene00011155	R09B3.2		RNA recognition motif. (aka RRM, RBD, or RNP domain)
R11.4	WBGene00011229	R11.4
R12B2.7	WBGene00020021	R12B2.7
T05G5.4	WBGene00011499	T05G5.4
T08G5.10	WBGene00003474	mtl-2	mtl-2 encodes one of two C. elegans metallothioneins, small, cysteine-rich, metal-binding proteins; MTL-2 functions in metal detoxification and homeostasis and stress adaptation; in addition, mtl-2 plays a role in regulating growth and fertility; mtl-2 expression is induced in larval and adult intestinal cells following exposure to cadmium or heat shock; MTL-2 intestinal expression is dependent u…
T09A12.5	WBGene00020374	T09A12.5
T10B11.1	WBGene00020397	pcbd-1	T10B11.1 is orthologous to the human gene PTERIN-4-ALPHA-CARBINOLAMINE DEHYDRATASE (PCBD or TCF1; OMIM:126090), which when mutated leads to hyperphenylalaninemia with primapterinuria.
T15B7.12	WBGene00020524	T15B7.12
T22G5.7	WBGene00004997	spp-12
T24D8.3	WBGene00003760	nlp-22
T26H5.9	WBGene00044206	T26H5.9
W01B6.7	WBGene00000593	col-2	col-2 encodes a member of the collagen superfamily containing collagen triple helix repeats (20 copies); expression peaks during the molt that separates the L2 larval and dauer stages as the dauer cuticle is being formed, and mRNA is expressed at low levels in post-dauer L4 larvae and in adult animals.	cuticle collagen (CC02)
W01D2.1	WBGene00012179	W01D2.1		ribosomal protein L37
W02D9.6	WBGene00012212	W02D9.6
W02D9.7	WBGene00012213	W02D9.7
W08A12.2	WBGene00021079	W08A12.2
W08F4.11	WBGene00021100	W08F4.11
W10G6.1	WBGene00012378	W10G6.1
Y110A2AL.1	WBGene00022438	Y110A2AL.1
Y111B2A.2	WBGene00013728	Y111B2A.2
Y17G7B.1	WBGene00012457	acbp-6		Acyl CoA binding protein
Y17G9B.2	WBGene00021199	Y17G9B.2
Y22D7AR.10	WBGene00021263	Y22D7AR.10
Y37D8A.19	WBGene00012557	Y37D8A.19
Y37E11B.7	WBGene00021379	Y37E11B.7
Y38E10A.11	WBGene00012589	nspe-4
Y38E10A.16	WBGene00012594	nspe-5
Y39A3CL.3	WBGene00021441	Y39A3CL.3
Y39A3CR.4	WBGene00000941	ddp-1	ddp-1 encodes the C. elegans ortholog of Saccharomyces cerevisiae Tim8p and human deafness/dystonia peptide (DDP; OMIM:300356, mutated in Mohr-Tranebjaerg syndrome); by homology, DDP-1 is predicted to be part of a heterooligomeric complex that localizes to the mitochondrial intermembrane space and facilitates translocation of proteins from the cytosol to the inner mitochondrial membrane; loss of …
Y39B6A.5	WBGene00012668	Y39B6A.5
Y40B10A.6	WBGene00021491	Y40B10A.6
Y41D4B.5	WBGene00004497	rps-28	rps-28 encodes a small ribosomal subunit S28 protein.
Y43F8C.18	WBGene00012839	Y43F8C.18
Y43F8C.2	WBGene00003764	nlp-26	nlp-26 encodes a predicted neuropeptide not found in multigene families within C. elegans and is not clearly related to other well-characterized neuropeptides.
Y45F10C.6	WBGene00044256	Y45F10C.6
Y51A2D.9	WBGene00013077	ttr-24		Transthyretin-like family
Y53F4B.14	WBGene00013161	Y53F4B.14
Y54G9A.9	WBGene00013211	Y54G9A.9
Y57G11C.5	WBGene00013303	Y57G11C.5
Y57G11C.52	WBGene00044741	Y57G11C.52
Y68A4A.13	WBGene00044212	Y68A4A.13
Y69A2AR.3	WBGene00022075	Y69A2AR.3
Y71F9AL.6	WBGene00022111	Y71F9AL.6
Y71F9B.4	WBGene00004920	snr-7	snr-7 encodes the C. elegans ortholog of the small nuclear ribonucleoprotein G, one of seven subunits of the heptameric Sm complex required for the biogenesis and function of snRNPs that catalyze mRNA splicing; in addition to its predicted role in pre-mRNA processing, SNR-7 activity is essential for embryogenesis and for several aspects of germ cell specification including localization and subcel…	small nuclear ribonucleoprotein Sm G (snRNP core protein G)
Y71G12B.14	WBGene00003080	lsm-6		U6 small nuclear RNA-associated Sm-like protein LSm6
Y71H2B.4	WBGene00022194	Y71H2B.4
Y73C8C.2	WBGene00022261	clec-210
Y82E9BR.3	WBGene00022336	Y82E9BR.3
Y94H6A.12	WBGene00050885	Y94H6A.12
ZC373.2	WBGene00013867	ZC373.2
ZK287.8	WBGene00001842	her-1	her-1 generates two transcripts, the larger of which encodes a small, secreted, cysteine-rich protein (HER-1A) required for normal sex determination in wild-type XO male animals, while being dispensable for sex determination in XX hermaphrodites; transcription of her-1 in XX animals is repressed by SDC-2; HER-1A protein has two all-helical domains, with fourteen conserved cysteine residues formin…	HER-1 protein
ZK520.5	WBGene00000878	cyn-2	cyn-2 is a predicted member of the cytosolic Cyclosporin A-binding cyclophilin family that is functional when expressed in E. coli.	Peptidyl-prolyl cis-trans isomerases
ZK652.2	WBGene00022783	tomm-7
ZK813.2	WBGene00022821	ZK813.2
