# Supplementary material for: A Comprehensive Analysis of Gene Expression Changes Provoked by Bacterial and Fungal Infection in C. elegans
Source: PLoS One. 2011 May 13;6(5):e19055. doi: 10.1371/journal.pone.0019055 (PMC3094335; doi:10.1371/journal.pone.0019055)
Supplement: Table S13 — Gene categories regulated by bacterial and/or fungal infection. Shared gene categories up (A) and down-regulated (B) upon fungal and bacterial infection (RNA-seq). (XLS) [file pone.0019055.s017.xls]

## Sheet: TableS13A
Gene categories shared among genes up-regulated upon fungal and bacterial infection (RNAseq)
	D. coniospora		Harposporium		Three bacteria
Gene Category	Number of genes	Probability	Number of genes	Probability	Number of genes	Probability
>=2 up after 8 h infection with S. aureus -- Irazoqui -- 2010	63	4.37857e-23	36	0.000789995	17	0.000453257
Up by S. aureus AND P. aeruginosa NOT M. nematophilum -- Irazoqui -- 2010	21	1.8211e-15	11	0.0005654	4	0.0290212
Cadmium up -- Cui -- 2007	58	7.22168e-15	52	4.77019e-07	17	0.00415834
EF up Tiling Array -- Engelmann -- This study	440	2.5251e-11	624	3.91016e-21	219	1.81845e-11
>=2 up wt vs GacA PA14 at 4 hours -- Troemel -- 2006	45	2.33034e-10	93	2.52106e-37	19	9.186e-05
PL up Tiling Array -- Engelmann -- This study	407	6.77348e-10	648	4.94397e-36	317	1.25176e-57
Down >=2 PA14 4 h -- Troemel -- 2006	53	2.24642e-07	130	5.53802e-45	26	5.26812e-05
Down >=2 PA14 8 h -- Troemel -- 2006	48	2.8304e-07	129	2.80644e-52	25	1.50023e-05
up osm-8 -- Rohlfing -- 2010	112	3.47621e-07	113	0.0234637	88	1.47802e-19
Infection_Mnematophilum UP -- O'Rourke -- 2006	19	3.76365e-07	23	1.03904e-07	7	0.00701326
Db24 up Tiling Array -- Engelmann -- This study	270	6.14465e-05	515	4.87186e-43	243	2.82899e-48
>=2 up wt vs GacA PA14 at 8 hours -- Troemel -- 2006	29	0.000109533	82	2.43831e-34	14	0.00302054
UP>=2 by PMK-1 -- Troemel -- 2006	18	0.000176133	33	3.93106e-11	10	0.000967863
Regulated UP>3fold _PMK-1,daf2/daf2pmk1 -- Troemel -- 2006	9	0.00200837	13	7.10081e-05	7	0.000242475
Male -- Kim -- 2001	137	0.0265793	243	1.25039e-12	67	0.0127388
up dpy-9 -- Rohlfing -- 2010	158	0.039632	253	1.44475e-07	166	5.06524e-35
Db10 down RNA-seq -- Engelmann -- This study	297	3.59604e-79	229	3.01194e-20
PL down RNA-seq -- Engelmann -- This study	234	3.04055e-72	250	9.69881e-57
EF down RNA-seq -- Engelmann -- This study	223	3.74596e-72	225	2.37886e-49
upregulated by tert-butyl hydrogen peroxide (SKN-1-independent) -- Oliveira -- 2009	56	1.13096e-14	33	0.0455932
lin35_Upregulated -- Kirienko -- 2007	88	1.88355e-14	94	1.29927e-09
down >=2 daf-16(m26) -- Budovskaya -- 2008	59	7.95161e-14	49	5.31597e-05
Osmotically down-regulated gene "6h", -- Rohlfing -- 2010	28	1.31048e-11	26	2.32513e-07
Peptide, potentially antimicrobial -- Pujol -- 2008	18	2.4755e-08	10	0.0395554
up-regulated by Bacillus thuringiensis PFT Cry5B and S. aureus -- Irazoqui -- 2010	11	4.40372e-08	8	0.00054389
down >=2 in age-1 -- Budovskaya -- 2008	20	3.82932e-07	16	0.00302242
PL down Tiling Array -- Engelmann -- This study	48	2.10779e-05	52	0.00209266
Osmotically up-regulated gene 1Generation" -- Rohlfing -- 2010"	23	5.04155e-05	19	0.0482491
Osmotically down-regulated gene 15min" -- Rohlfing -- 2010"	10	0.000159731	9	0.0064225
Regulated UP_>2fold,Dauer/[Dauer+12hrs] -- McElwee -- 2004	108	0.000216634	145	2.1196e-05
Osmotically up-regulated gene 15min" -- Rohlfing -- 2010"	24	0.000519126	23	0.0393782
Osmotically down-regulated gene 1Generation" -- Rohlfing -- 2010"	8	0.000607972	9	0.000954365
Osmotically up-regulated gene 1h" -- Rohlfing -- 2010"	20	0.000908391	31	1.43174e-06
>=2 up daf-2 (D6) -- Halaschek-Wiener -- 2005	8	0.00179639	10	0.000741066
EF down Tiling Array -- Engelmann -- This study	33	0.00200801	40	0.00467841
Regulated UP_Bt toxin,Cry5B -- Huffman -- 2004	43	0.0106125	75	8.55732e-08
up skn-1 mutant, normal culture condition -- Oliveira -- 2009	11	0.0126404	13	0.0189563
Up by L. chromiireducens and S. aureus -- Irazoqui -- 2010	3	0.0149483	5	0.000285993
up >1,75 fold in M. luteus vs E. coli -- Coolon -- 2009	5	0.0246539	6	0.0228584
up >= 2 Infection Yersinia pestis -- Bolz -- 2010	14	0.0285647	20	0.0048471
UP >=3 by DKF-2 -- Ren -- 2009	12	0.0406368	20	0.000685352
Regulated UP_Cadmium -- Huffman -- 2004	46	0.0416438	77	1.68802e-05
Up by S. aureus AND P. aeruginosa AND M. nematophilum -- Irazoqui -- 2010	3	0.0425708	5	0.00257594
Harpo down RNA-seq -- Engelmann -- This study	219	1.70069e-12			83	0.00180137
Up by S. aureus AND M. nematophilum NOT P. aeruginosa -- Irazoqui -- 2010	4	0.00630685			2	0.0473716
Cytochrome P450 -- Menzel -- 2001	12	0.0135333			9	0.00102109
DC12 down RNA-seq -- Engelmann -- This study			404	2.00313e-23	251	2.75197e-65
>=2 down after 8 h infection with S. aureus -- Irazoqui -- 2010			73	1.01444e-21	20	2.91654e-05
Regulated DOWN_>2fold,daf2 mutant,-IGF1 -- McElwee -- 2004			87	6.62947e-20	34	4.67981e-10
UP>=2 by SEK-1 -- Troemel -- 2006			39	2.48809e-13	10	0.00281905
up dpy-10 -- Rohlfing -- 2010			292	3.33098e-10	175	5.48116e-34
Intestine-enriched_mRNA-tag -- Pauli -- 2006			110	7.06307e-09	42	1.10905e-05
Regulated DOWN_daf2 mutant&RNAi,Class2,-IGF1 -- Murphy -- 2003			51	2.36475e-07	15	0.013294
Up >=2 PA14 4 h -- Troemel -- 2006			33	6.16987e-07	9	0.0294175
Cadmium down -- Cui -- 2007			18	2.25771e-06	5	0.0299292
up by dbl-1 (>=2 FC or p<=0.001) -- Roberts -- 2010			57	3.64543e-06	22	0.000480641
down skn-1 mutant, normal culture condition -- Oliveira -- 2009			47	2.85692e-05	21	9.31273e-05
up by SEK-1 and PMK-1 -- Troemel -- 2006			8	0.000125684	3	0.0179334
gene down regulated in TF zip-2 RNAi on OP50 -- Estes -- 2010			42	0.000172957	27	1.42098e-08
down skn-1 mutant, up by sodium arsenite -- Oliveira -- 2009			26	0.000378083	10	0.00914905
>=2 down wt vs GacA PA14 at 4 hours -- Troemel -- 2006			19	0.00130744	10	0.000664146
Lipid Metabolism -- Kim -- 2001			48	0.00634734	27	1.22457e-05
Regulated UP_CytP450,betaNapthoflavone -- Menzel -- 2001			4	0.0357042	4	0.000634096

## Sheet: TableS13B
Gene categories shared among genes down-regulated upon fungal and bacterial infection (RNAseq)
	DC12		Harposporium		common3bacteria
Gene Category	Number of genes	Probability	Number of genes	Probability	Number of genes	Probability
Regulated UP_>2fold,daf2 mutant,+IGF1 -- McElwee -- 2004	57	0.000601571	43	0.00178292	12	3.03343e-06
Infection-Down Dconio 24 h (oligo) -- Pujol -- 2008	73	0.0102969	53	0.0321298	9	0.00754378
EF up RNA-seq -- Engelmann -- This study	841	5.23557e-136	452	4.22742e-28
PL up RNA-seq -- Engelmann -- This study	812	3.72365e-128	427	1.1556e-23
PL up Tiling Array -- Engelmann -- This study	815	2.5798e-72	405	9.10037e-05
EF up Tiling Array -- Engelmann -- This study	692	6.23675e-23	411	0.00574194
Cell structural,muscle -- Kim -- 2001	81	6.98674e-10	51	0.000113252
Harpo down RNA-seq -- Engelmann -- This study	271	1.73982e-06	1688	0
Regulated UP_collagen,xenobiotics -- Reichert -- 2005	8	0.00466868	7	0.00326091
up osm-7 -- Rohlfing -- 2010	34	0.0281471	26	0.0341026
Mechanosensation -- Kim -- 2001	4	0.0372405	4	0.0130687
Up >=2 PA14 4 h -- Troemel -- 2006	80	1.10525e-43			4	0.0133221
Harpo up RNA-seq -- Engelmann -- This study	402	5.85192e-23			51	3.26403e-15
Age-Regulated Genes -- Budovskaya -- 2008	174	6.46236e-05			17	0.00291138
>=2 up wt vs GacA PA14 at 4 hours -- Troemel -- 2006	44	6.59966e-05			6	0.00392026
Db24 down Tiling Array -- Engelmann -- This study			244	1.50155e-15	37	1.01351e-09
DC12 up RNA-seq -- Engelmann -- This study			219	1.60299e-12	70	1.23249e-38
Cadmium up -- Cui -- 2007			37	0.000479072	5	0.0312861
down >1,75 fold in Pseudomonas sp vs E. coli -- Coolon -- 2009			8	0.041361	3	0.00442826
