# Supplementary material for: A Comprehensive Analysis of Gene Expression Changes Provoked by Bacterial and Fungal Infection in C. elegans
Source: PLoS One. 2011 May 13;6(5):e19055. doi: 10.1371/journal.pone.0019055 (PMC3094335; doi:10.1371/journal.pone.0019055)
Supplement: Table S15 — Genes regulated by S. marcescens infection. Genes up-regulated after S. marcescens infection: genes shared between data sets (A). Potential biomarkers for S. marcescens infection (B). Gene lists are based on WS210. (XLS) [file pone.0019055.s019.xls]

## Sheet: TableS15A
Genes up-regulated after S. marcescens infection: genes shared between datasets
Tiling arrays + RNA-seq	Tiling arrays + cDNA-arrays	Tiling arrays + Oligo-arrays	cDNA-arrays + Oligo-arrays	RNA-seq + Oligo-arrays	RNA-seq + cDNA-arrays	Tiling arrays + RNA-seq + cDNA-arrays	Tiling arrays + RNA-seq + Oligo-arrays	all four techniques
AC3.8	B0491.2	AC3.8	C29E4.1	AC3.8	B0491.2	B0491.2	AC3.8	C29E4.1
B0024.1	C01B10.6	B0344.2	F56H1.4	B0034.4	C01B10.6	C01B10.6	B0344.2	F57F4.3
B0024.15	C01B12.1	B0395.2	F57F4.3	B0344.2	C01B12.1	C01B12.1	B0395.2
B0024.4	C02A12.4	C02E7.10	M7.2	B0395.2	C16H3.2	C16H3.2	C29E4.1
B0035.13	C16H3.2	C05H8.1	Y37E3.9	C15F1.2	C17G10.5	C17G10.5	C34G6.6
B0244.10	C17G10.5	C08B11.4	Y38C1BA.3	C29E4.1	C23H5.8	C23H5.8	C46G7.4
B0280.4	C23H5.8	C11E4.7		C29F3.2	C29E4.1	C29E4.1	C52E4.5
B0302.5	C29E4.1	C18A3.4		C30G12.1	C29F4.1	C29F4.1	D1025.2
B0344.2	C29F4.1	C29E4.1		C30H6.2	C31H2.2	C31H2.2	F10D2.9
B0365.5	C31H2.2	C30G4.5		C33D3.3	C47B2.6	C47B2.6	F26G1.4
B0365.6	C44E4.6	C34G6.6		C34G6.6	C49F5.1	C49F5.1	F37B4.7
B0393.5	C47B2.6	C46G7.4		C46G7.4	C55B7.4	C55B7.4	F39D8.3
B0395.2	C49F5.1	C52E4.5		C52E4.5	D2023.7	F13D12.6	F41B5.7
B0403.5	C50D2.4	D1025.2		C54A12.2	F08G5.4	F19C7.1	F43H9.2
B0491.2	C55B7.4	EEED8.3		D1025.2	F09F7.4	F22F7.1	F46G10.4
B0495.4	F13D12.6	F02D10.1		F09F9.2	F11E6.3	F27C1.8	F56F4.8
B0496.3	F17C8.2	F02H6.6		F10D2.9	F13D12.6	F28A12.4	F57F4.3
B0554.6	F19C7.1	F10D2.9		F10E9.5	F19C7.1	F40F4.6	K08H10.9
C01B10.10	F22F7.1	F13A7.7		F14B6.6	F22F7.1	F53F1.4	R10D12.9
C01B10.6	F26D10.3	F13D12.8		F21C10.6	F23H12.4	F55H2.2	T02B5.1
C01B12.1	F27C1.8	F13E9.4		F26G1.4	F27C1.8	F57F4.3	T06A4.3
C01F1.5	F28A12.4	F21C10.8		F32H2.8	F28A12.4	F57F4.4	W02B12.4
C01F6.6	F35B12.7	F25E2.5		F37B4.7	F40F4.6	F57F5.1	W05E10.4
C01G5.9	F36A4.6	F26G1.4		F38A1.4	F41E6.2	F58G1.4	Y38F2AL.3
C01G6.7	F40F4.6	F35C12.3		F39D8.3	F53F1.4	K06G5.1	Y53F4B.30
C01H6.4	F53F1.4	F37B4.7		F40F9.5	F54D11.1	K12H4.7	Y71D11A.1
C01H6.8	F55H2.2	F39D8.3		F41B5.7	F55H2.2	LLC1.2
C02D5.1	F57F4.3	F41B5.7		F43H9.2	F57F4.3	R11H6.1
C02F5.11	F57F4.4	F42A10.8		F44G3.14	F57F4.4	T10B10.1
C02F5.8	F57F5.1	F43C11.4		F46G10.4	F57F5.1	T14B4.7
C02H6.2	F58G1.4	F43H9.2		F49C12.6	F58G1.4	T18H9.2
C03D6.1	K06G5.1	F44A2.4		F53H2.1	K06G5.1	T25C8.2
C03F11.3	K12H4.7	F44C8.8		F56F4.8	K09F5.2	VC5.3
C04F5.7	LLC1.2	F46F5.8		F57F4.3	K12H4.7	W04B5.3
C05A9.1	R11H6.1	F46G10.4		F59F5.5	LLC1.2	W04E12.8
C05C10.4	T10B10.1	F52E1.9		H03G16.2	R07B1.10	Y22F5A.4
C05C12.3	T14B4.7	F53B6.8		K02E11.4	R11H6.1	Y32F6A.5
C05C12.4	T18H9.2	F54H12.4		K08H10.9	T03E6.7	Y38F1A.6
C05C8.7	T21D9.1	F56C3.7		K11G9.3	T05G5.6	Y38H6C.1
C05D12.3	T25C8.2	F56F11.4		M151.2	T10B10.1	Y39B6A.1
C05D12.4	VC5.3	F56F4.8		R08A2.5	T14B4.7	Y51F10.7
C05D2.4	W04B5.3	F57F4.3		R10D12.9	T18H9.2	Y54G2A.6
C05D2.8	W04E12.8	F58E2.9		R11G1.3	T25C8.2	Y55B1AR.1
C05D9.2	Y119D3B.21	F58E6.7		T02B5.1	VC5.3	ZK1127.10
C05E11.5	Y22F5A.4	F58H7.3		T06A4.3	W04B5.3
C06B8.2	Y32F6A.5	H16O14.1		T07G12.3	W04E12.8
C06C3.6	Y38F1A.6	K02A4.2		T11F8.2	Y22F5A.4
C06E1.8	Y38H6C.1	K08E3.2		T13B5.9	Y32F6A.5
C06G8.3	Y39B6A.1	K08H10.9		T13C2.2	Y38F1A.6
C06H5.1	Y39G8C.2	K10D2.6		T13F3.6	Y38H6C.1
C07A9.11	Y51F10.7	R03G5.6		W02B12.4	Y39B6A.1
C07A9.8	Y54G2A.6	R05A10.8		W05E10.4	Y51F10.7
C07E3.10	Y55B1AR.1	R10D12.9		Y116A8C.5	Y54G2A.6
C08B6.11	ZC513.8	T01G6.9		Y18D10A.2	Y55B1AR.1
C08B6.3	ZK1127.10	T02B5.1		Y38F2AL.3	ZK1127.10
C08F1.4		T02H6.10		Y44A6B.3	ZK6.7
C08F1.5		T05C12.5		Y51H4A.10
C08F11.13		T05H4.7		Y53F4B.30
C08F11.5		T06A4.3		Y71D11A.1
C08F11.8		T09E11.1		ZC374.2
C09E8.2		T13C2.3		ZK1240.6
C09F12.1		T26E3.7		ZK354.8
C12C8.2		T26H2.10		ZK381.3
C12D12.1		W02B12.4
C12D12.5		W05E10.4
C12D8.5		Y105C5B.25
C13D9.1		Y116A8C.40
C13D9.9		Y12A6A.1
C14C11.3		Y32G9A.3
C14C11.4		Y38F2AL.3
C14C6.2		Y4C6A.4
C14C6.5		Y50F7A.2
C15B12.7		Y53F4B.30
C15C7.5		Y65B4BR.1
C15C7.7		Y69A2AR.23
C15C8.3		Y71A12B.10
C16A3.10		Y71D11A.1
C16C10.13		Y71H2B.11
C16C8.10		Y76B12C.8
C16C8.2		ZK1005.1
C16D9.2
C16D9.4
C16H3.2
C17C3.1
C17C3.15
C17F4.2
C17F4.7
C17G1.3
C17G10.5
C17H12.12
C17H12.6
C17H12.8
C18A11.3
C18B2.1
C18B2.5
C18C4.3
C18D4.2
C18E9.5
C18H7.11
C18H9.6
C23G10.6
C23H5.1
C23H5.8
C24A11.2
C24F3.6
C24G6.7
C24G7.1
C25A8.1
C25E10.4
C25F9.4
C26B2.3
C26B9.3
C26B9.5
C26B9.7
C26C6.9
C26G2.2
C27D8.3
C28C12.4
C28H8.11
C29E4.1
C29E4.7
C29F3.1
C29F3.5
C29F3.7
C29F4.1
C29F9.3
C29F9.4
C30F12.1
C30F2.4
C30F8.3
C30G12.3
C30H6.1
C31A11.1
C31A11.5
C31H2.2
C32B5.8
C32H11.1
C32H11.12
C32H11.4
C32H11.5
C33A12.6
C33C12.3
C33C12.4
C33D3.1
C33G3.3
C33G8.3
C33G8.8
C34B7.3
C34C12.6
C34D1.5
C34D4.3
C34E10.9
C34G6.6
C34H4.1
C34H4.2
C34H4.3
C35A11.4
C35A5.3
C36A4.1
C36A4.2
C36B7.5
C37C3.10
C37C3.3
C38C6.6
C38H2.2
C39E9.3
C39H7.4
C40A11.1
C40H1.7
C41G7.6
C42D8.5
C43D7.5
C43G2.5
C44B11.1
C44B7.7
C44B7.9
C44C1.5
C44C10.11
C44C10.3
C44H4.5
C44H9.6
C45B11.3
C45B2.7
C45E5.1
C45G9.6
C45H4.17
C45H4.2
C46E1.2
C46G7.4
C47A10.5
C47A4.1
C47A4.2
C47B2.6
C47B2.8
C48B4.1
C49A9.4
C49A9.5
C49A9.9
C49C3.11
C49C3.4
C49C3.9
C49C8.5
C49F5.1
C49G7.12
C50A2.3
C50B6.4
C50B8.5
C50D2.1
C50E10.10
C50F7.5
C50H2.1
C52B9.2
C52B9.6
C52D10.1
C52D10.3
C52E4.5
C53A3.2
C53B4.3
C53B4.7
C53D6.11
C54D1.2
C54D10.1
C54F6.14
C55A6.11
C55A6.12
C55A6.7
C55B7.4
C56E10.4
C56E6.2
D1007.3
D1009.1
D1014.5
D1025.2
D1025.3
D1037.2
D1037.3
D1044.3
D1054.5
D2092.1
D2096.3
E01A2.7
E02C12.8
E02H9.3
E04D5.5
E04F6.15
E04F6.7
EGAP2.3
F01D4.1
F01D4.2
F01D4.6
F01D5.1
F01D5.2
F01D5.3
F01D5.5
F01D5.6
F01G10.3
F01G10.4
F01G12.2
F02D10.5
F07A11.5
F07B10.1
F07C6.2
F07E5.1
F07F6.5
F07H5.9
F08A8.1
F08A8.2
F08A8.3
F08A8.4
F08C6.2
F08F3.3
F08G2.8
F08G5.5
F08G5.6
F08H9.7
F09B12.1
F09B12.3
F09B12.6
F09C12.2
F09C8.1
F09F7.5
F09G2.6
F09G8.8
F10A3.3
F10C1.8
F10C1.9
F10D11.6
F10D2.10
F10D2.11
F10D2.2
F10D2.9
F10E7.1
F10F2.5
F11A6.2
F11C1.3
F11E6.5
F11E6.9
F11G11.10
F11G11.12
F11G11.3
F12F6.9
F13B6.1
F13B6.3
F13D12.6
F13D12.9
F13E6.5
F13H8.11
F13H8.5
F14B8.5
F14E5.1
F14H3.11
F15A2.2
F15A2.5
F15B9.6
F15E11.15
F16F9.2
F16F9.3
F17A2.3
F17A9.3
F17C11.12
F17C11.3
F17E9.5
F18E2.1
F18E9.4
F18E9.7
F18F11.4
F19B2.5
F19C7.1
F19C7.2
F19C7.4
F19C7.5
F19C7.6
F19C7.7
F19H8.2
F19H8.5
F20G2.1
F20G2.5
F21D5.3
F21F8.11
F21F8.3
F21F8.4
F21F8.6
F21H12.7
F21H7.1
F21H7.4
F22A3.1
F22A3.6
F22D6.15
F22E10.1
F22E10.2
F22E5.1
F22F4.1
F22F4.4
F22F7.1
F22G12.7
F23B2.12
F23F12.3
F23H12.5
F25A2.1
F25C8.2
F25D7.3
F25E2.4
F25G6.8
F25H8.6
F26B1.4
F26F2.1
F26G1.4
F27C1.8
F27C8.1
F28A12.1
F28A12.4
F28B4.3
F28E10.5
F28H7.3
F29C12.1
F29G6.3
F30A10.2
F30B5.1
F31D4.8
F31D5.5
F31F4.11
F32B6.4
F32D8.3
F32E10.3
F32H5.1
F33D11.3
F33D4.1
F33D4.2
F33D4.6
F33E2.7
F33H12.5
F35C5.5
F35C5.6
F35C5.8
F35C5.9
F35D11.7
F35E12.10
F35E12.5
F35E12.7
F35E12.8
F35E8.11
F35F10.4
F35G2.5
F36D3.4
F36G9.12
F36G9.14
F36H1.5
F36H2.5
F36H5.1
F37B1.8
F37B4.7
F37C4.6
F38A1.1
F38A5.3
F38B6.4
F38B6.5
F39D8.3
F39E9.1
F39E9.2
F40F4.6
F40F8.5
F40F8.7
F41B5.2
F41B5.3
F41B5.7
F41C6.5
F41C6.7
F41F3.3
F41H10.7
F41H10.8
F42A10.9
F42C5.10
F42C5.7
F42E11.3
F42G2.5
F42G4.5
F42G9.5
F43C9.1
F43E2.5
F43H9.2
F44C8.1
F44C8.9
F44E2.4
F44E7.5
F44E7.8
F44G3.10
F44G3.6
F45E1.3
F45E1.4
F45E4.1
F45E4.8
F46C3.3
F46C8.6
F46E10.1
F46G10.4
F46G10.6
F47B10.2
F47B10.7
F47B8.4
F47C12.6
F47F6.1
F47F6.3
F47G4.3
F47G4.7
F48C1.1
F48F7.5
F48F7.7
F49C12.7
F49E12.12
F49E12.2
F49E12.9
F49F1.1
F49F1.6
F49F1.7
F49H6.13
F52B11.3
F52E1.14
F52E1.7
F52F10.3
F52H2.3
F52H2.6
F53B1.4
F53C11.1
F53C3.12
F53E10.4
F53F1.4
F53F1.5
F54B11.2
F54D5.3
F54D5.4
F54E2.1
F54F3.1
F54F3.3
F54F7.8
F54H5.4
F55B12.9
F55C5.9
F55F3.2
F55F3.3
F55F3.4
F55F8.1
F55F8.8
F55G1.15
F55G11.2
F55G11.4
F55G11.5
F55G11.7
F55G11.8
F55H12.3
F55H2.2
F56C3.2
F56C3.9
F56C9.7
F56D3.1
F56D6.2
F56F10.1
F56F4.8
F56H1.1
F57B9.9
F57F4.3
F57F4.4
F57F5.1
F57G8.5
F58A4.1
F58A6.2
F58A6.9
F58B3.1
F58B3.3
F58G1.4
F58G1.5
F58G6.7
F59A1.10
F59A1.8
F59B1.8
F59E11.12
F59F5.1
H02F09.3
H03A11.2
H03E18.1
H12D21.7
H12D21.9
H19M22.3
H20E11.1
H20E11.3
H25K10.1
H25P06.4
H34I24.2
H42K12.3
H43E16.1
JC8.12
K01A2.11
K01B6.1
K01D12.11
K01D12.12
K01F9.2
K02A4.1
K02B12.9
K02D7.3
K02D7.4
K02E10.4
K02E11.10
K02E11.5
K02G10.3
K03A1.5
K03H9.2
K04A8.1
K04A8.5
K04A8.6
K04F1.9
K05B2.5
K05F1.9
K05G3.3
K06A4.1
K06A4.5
K06G5.1
K07B1.4
K07C6.3
K07C6.4
K07E3.7
K07E8.3
K07H8.6
K08B12.1
K08B4.3
K08C9.4
K08D8.1
K08D8.4
K08D8.5
K08D8.6
K08E5.3
K08F8.4
K08F8.7
K08H10.9
K09B11.10
K09C8.1
K09E10.2
K09E9.1
K10B2.2
K10C2.1
K10C2.3
K10C8.2
K10D11.1
K10D11.2
K10D11.5
K10D11.6
K10G4.13
K10G4.3
K10H10.2
K11D12.10
K11H12.10
K11H12.4
K12C11.3
K12H4.7
LLC1.2
M02F4.7
M02H5.11
M02H5.8
M03A8.1
M03B6.1
M03E7.4
M04C3.2
M110.8
M163.11
M28.10
M6.1
M7.10
PDB1.1
R01H2.5
R01H2.7
R03G5.5
R03G8.3
R04B3.1
R04B5.8
R04B5.9
R04D3.1
R05F9.12
R05H10.6
R05H5.6
R06B10.3
R07B1.13
R07B1.3
R07B1.4
R07B1.5
R07B7.11
R07B7.9
R07E3.4
R07E3.6
R07E3.7
R08B4.1
R08C7.4
R08E3.1
R08E3.2
R08F11.3
R08F11.4
R09A1.3
R09B5.4
R09D1.10
R09H10.5
R102.1
R102.4
R10D12.9
R10H10.3
R11A5.7
R11D1.11
R11E3.1
R11H6.1
R12A1.4
R12C12.1
R12C12.9
R12E2.5
R13H4.3
R186.6
R193.2
R52.7
R52.8
R57.1
R57.2
T01B11.2
T01B7.7
T01D3.6
T01G6.7
T02B11.4
T02B5.1
T02C12.1
T02D1.5
T02G5.6
T03E6.5
T03G6.1
T05A12.2
T05A7.5
T05C12.10
T05C3.6
T05E12.6
T05E7.1
T05H4.15
T06A1.5
T06A4.3
T06D8.10
T06G6.6
T06G6.7
T07E3.4
T07H3.6
T07H8.6
T08A9.12
T08A9.8
T08B1.1
T09A12.1
T09B4.7
T10B10.1
T10B10.8
T10B9.7
T10C6.10
T10G3.3
T10H4.12
T10H9.5
T12A7.4
T12A7.9
T12B3.1
T12B5.10
T12B5.8
T13A10.10
T13C5.7
T14B4.6
T14B4.7
T14G12.2
T15B7.1
T16G1.5
T16G1.6
T16G12.1
T18H9.1
T18H9.2
T19A5.3
T19B10.1
T19B10.5
T19C3.2
T19D12.1
T19D7.3
T20B3.12
T20D3.2
T20D4.1
T21C12.2
T21C9.6
T21C9.8
T21D12.2
T21G5.2
T21G5.6
T21H3.1
T22B11.2
T22D1.11
T22F3.8
T22G5.5
T23F2.1
T24B8.5
T24C4.4
T24C4.7
T24C4.8
T24E12.5
T25B9.1
T25C12.3
T25C12.4
T25C8.2
T25D10.1
T25E12.12
T25E12.13
T25G12.6
T26C12.6
T26C5.1
T26C5.2
T27A10.3
T27A10.6
T27B7.4
T27C10.4
T27C5.8
T28B4.4
T28F2.7
T28F3.4
T28F3.8
VC5.3
VW02B12L.1
VZK822L.2
W01A11.4
W01C8.5
W01F3.3
W02B12.4
W02G9.2
W02G9.4
W03D8.11
W03F9.11
W04B5.3
W04E12.6
W04E12.8
W04G3.1
W04G3.2
W04G3.3
W04G3.8
W05B2.5
W05E10.4
W06B3.1
W06B3.2
W07A12.6
W07A12.7
W07A12.8
W08D2.1
W08E12.1
W08F4.6
Y102A11A.3
Y102A11A.5
Y102A5B.1
Y102A5B.3
Y102E9.5
Y105C5B.14
Y105C5B.15
Y106G6H.1
Y113G7B.14
Y116F11B.6
Y119D3B.13
Y119D3B.8
Y11D7A.9
Y16B4A.2
Y17D7C.6
Y17G7B.11
Y17G7B.8
Y18D10A.6
Y18H1A.12
Y22D7AR.13
Y22D7AR.9
Y22F5A.4
Y22F5A.5
Y24D9A.5
Y32B12A.3
Y32F6A.4
Y32F6A.5
Y32F6B.3
Y32G9B.1
Y34B4A.5
Y34B4A.6
Y34B4A.9
Y34D9A.11
Y34F4.4
Y37E11AL.1
Y37E11B.10
Y38A10A.2
Y38C1AA.6
Y38E10A.5
Y38F1A.3
Y38F1A.6
Y38F2AL.3
Y38H6C.1
Y39A1A.9
Y39A3B.3
Y39B6A.1
Y39B6A.20
Y39B6A.41
Y39D8A.1
Y39D8C.1
Y39H10A.5
Y40D12A.2
Y40H7A.10
Y41D4B.16
Y41D4B.17
Y41D4B.18
Y41E3.2
Y42H9B.1
Y43C5A.2
Y43F4A.4
Y43F8B.12
Y43F8C.13
Y43F8C.5
Y46C8AL.2
Y46C8AL.3
Y46C8AL.5
Y46D2A.1
Y46D2A.2
Y46G5A.29
Y47D7A.5
Y47G6A.30
Y47H9C.1
Y48A6B.7
Y49E10.18
Y4C6B.2
Y4C6B.6
Y50D4B.3
Y50D4B.4
Y50E8A.16
Y51A2D.13
Y51F10.7
Y51H4A.25
Y51H4A.7
Y53C10A.5
Y53F4B.2
Y53F4B.27
Y53F4B.29
Y53F4B.30
Y53F4B.31
Y53G8AR.7
Y53H1B.4
Y54E5A.1
Y54F10BM.11
Y54G11A.12
Y54G2A.14
Y54G2A.3
Y54G2A.33
Y54G2A.39
Y54G2A.45
Y54G2A.49
Y54G2A.6
Y54G2A.9
Y54G9A.4
Y55B1AR.1
Y57A10A.23
Y57A10B.6
Y57G11C.41
Y57G11C.42
Y59H11AR.4
Y60A3A.16
Y60A3A.25
Y64H9A.2
Y65B4BL.6
Y65B4BR.6
Y67A10A.8
Y69A2AL.2
Y6G8.2
Y70C5C.6
Y71D11A.1
Y71G12B.2
Y71H10B.1
Y71H2AM.13
Y71H2AM.22
Y71H2B.7
Y73B6BL.14
Y73B6BL.25
Y73B6BL.31
Y73C8B.3
Y73E7A.8
Y75B8A.28
Y75B8A.3
Y7A5A.1
Y82E9BL.15
Y82E9BL.19
Y82E9BL.4
Y94H6A.10
Y94H6A.2
Y9C2UA.2
Y9C9A.8
ZC101.3
ZC123.1
ZC190.1
ZC196.1
ZC196.5
ZC239.16
ZC328.1
ZC328.2
ZC328.3
ZC376.2
ZC376.4
ZC416.6
ZC434.3
ZC443.6
ZC455.4
ZC47.5
ZC477.7
ZK1025.3
ZK1025.9
ZK1127.10
ZK1193.2
ZK1193.3
ZK1193.4
ZK1290.1
ZK1290.10
ZK1290.12
ZK1290.14
ZK1290.3
ZK1307.1
ZK1320.1
ZK1320.2
ZK1320.3
ZK180.6
ZK185.3
ZK218.1
ZK228.3
ZK228.4
ZK353.6
ZK381.2
ZK418.7
ZK455.7
ZK484.2
ZK507.4
ZK512.7
ZK520.2
ZK6.10
ZK6.11
ZK6.6
ZK622.5
ZK643.8
ZK673.9
ZK678.5
ZK742.3
ZK822.3
ZK822.5
ZK84.1
ZK84.2
ZK856.5
ZK863.9
ZK896.4
ZK896.5
ZK896.6
ZK896.7
ZK899.4
ZK930.3

## Sheet: TableS15B
Potential biomarkers for S. marcescens infection
1 .Genes up-regulated after S. marcescens infection: genes shared between tiling arrays, cDNA-arrays and RNA-seq datasets								2 .Genes up-regulated after S. marcescens infection: genes shared between tiling arrays and RNA-seq datasets with low expression in uninfected worms but high induction after infection
Sequence Name (Gene)	Gene WB ID	Gene Public Name	Gene Description (Concise)	CDS Description				Sequence Name (Gene)	Gene WB ID	Gene Public Name	Gene Description (Concise)	CDS Description
B0491.2	WBGene00005016	sqt-1	sqt-1 encodes a cuticle collagen; during larval and adult development, sqt-1 activity is required, likely redundantly, for normal cuticle, and hence organismal, morphology; sqt-1 mRNA abundance oscillates during larval development, peaking at one point during each larval stage and peaking again in adults; sqt-1 transcripts are also detected in animals at the L1-L2d molt; in the temporally distinc…	cuticle collagen SQT-1				B0554.6	WBGene00015259	dod-20
C01B10.6	WBGene00015280	C01B10.6						C05D12.3	WBGene00014666	C05D12.3
C01B12.1	WBGene00005017	sqt-2	sqt-2 encodes a collagen required for normal alae formation and body morphology; sqt-2 mutants exhibit a slightly dumpy phenotype and the bodies of mutants are helically twisted.	cuticular collagen				C17H12.6	WBGene00015932	C17H12.6
C16H3.2	WBGene00002272	lec-9	lec-9 encodes a predicted lectin that affects embryonic viability.	sugar-binding protein				C24G6.7	WBGene00001710	grl-1	grl-1 encodes a hedgehog-like protein, with an N-terminal signal sequence, a central proline-rich region, and a C-terminal Ground-like (Grl) domain; GRL-1 is expressed in intestine, neurons, and larval arcade cells; the Grl domain is predicted to form a cysteine-crosslinked protein involved in intercellular signalling, and it has subtle similarity to the N-terminal Hedge domain of HEDGEHOG protei…
C17G10.5	WBGene00003097	lys-8	lys-8 encodes a putative lysozyme required for normal longevity, probably because it prevents killing of C. elegans by bacteria infecting its gut; LYS-8 is expressed in intestine up to the terminal bulb of the pharynx, as well as in g1 and g2 pharyngeal gland cells; LYS-8 expression is induced by infection with Serratia marcescens, Pseudomonas aeruginosa, or (weakly) by Microbacterium nematophilu…					C30G12.3	WBGene00016275	C30G12.3
C23H5.8	WBGene00016027	C23H5.8						C31A11.5	WBGene00007833	oac-6
C29E4.1	WBGene00000665	col-90		Cuticle collagen				C35A11.4	WBGene00016431	C35A11.4		sugar transporter
C29F4.1	WBGene00000699	col-125		collagen				C37C3.10	WBGene00016502	C37C3.10
C31H2.2	WBGene00001070	dpy-8	dpy-8 encodes a collagen with a nematode-specific N-terminal domain that is required for normal body morphology and (perhaps) for a normal embryonic cell division rate; dpy-8 interacts genetically with emb-5 and glp-1.	collagen alpha (weak)				C43D7.5	WBGene00008068	sdz-6
C47B2.6	WBGene00008132	gale-1	gale-1 encodes a putative UDP-galactose-4-epimerase, orthologous to human GALE (OMIM:606953, mutated in galactose epimerase deficiency); GALE-1 is thought to interconvert UDP-N-acetylglucosamine and UDP-N-acetylgalactosamine at the end of the hexosamine pathway; gale-1 is expressed in neurons, intestine and the developing reproductive system, but has no observed function in mass RNAi assays.	NAD dependant epimerase/dehydratase family				C45H4.2	WBGene00016686	cyp-33C1		cytochrome P450
C49F5.1	WBGene00008205	sams-1	sams-1 encodes an S-adenosyl methionine synthetase; by homology, SAMS-1 is predicted to function as a methyl-group donor in many biochemical reactions; sams-1 expression levels are negatively regulated by dietary restriction (as seen in eat-2 mutant animals), suggesting that increased lifespan due to dietary restriction is due, in part, to reducing the activity of key metabolic enzymes; loss of s…	s-adenosylmethionine synthetase				C52D10.3	WBGene00016877	C52D10.3
C55B7.4	WBGene00016943	acdh-1	acdh-1 encodes a short-chain acyl-CoA dehydrogenase; ACDH-1 is predicted to be a mitochondrial enzyme that catalyzes the first step of fatty acid beta-oxidation and thus plays a key role in energy production; steady-state acdh-1 mRNA levels are under the control of the MDT-15 mediator complex subunit; in addition, gene expression studies indicate that acdh-1 expression is upregulated in daf-2 mut…	acyl-CoA dehydrogenase				E04F6.7	WBGene00000971	dhs-7	dhs-7 encodes a short-chain dehydrogenase predicted to be mitochondrial.	Ribitol dehydrogenase
F13D12.6	WBGene00008741	F13D12.6	F13D12.6 is orthologous to the human gene SIMILAR TO PROTECTIVE PROTEIN FOR BETA-GALACTOSIDASE (GALACTOSIALIDOSIS) (PPGB; OMIM:256540), which when mutated leads to disease.	serine carboxypeptidase				F07F6.5	WBGene00017218	dct-5
F19C7.1	WBGene00017591	F19C7.1						F07H5.9	WBGene00008560	pho-13		acid phosphatase
F22F7.1	WBGene00017719	F22F7.1						F10A3.3	WBGene00008633	fbxa-18	This gene encodes a protein containing an F-box, a motif predicted to mediate protein-protein interactions either with homologs of yeast Skp-1p or with other proteins.
F27C1.8	WBGene00001067	dpy-5	dpy-5 encodes a Group I cuticle procollagen; dpy-5 activity is required for wild-type body length, cuticle structure (width of the annuli), postembryonic growth rates, and reproduction; dpy-5 is described as an intermediate collagen gene, as its mRNA, which is present in all larval stages, adults, and dauer larvae, increases in abudance two hours prior to the secretion of each new cuticle; a dpy-…	cuticular collagen				F12F6.9	WBGene00000702	col-128		collagen
F28A12.4	WBGene00017881	F28A12.4		peptidase				F18E9.4	WBGene00017570	F18E9.4
F40F4.6	WBGene00018237	F40F4.6		EGF-like repeats				F18F11.4	WBGene00017577	F18F11.4		serine/threonine-protein kinase
F53F1.4	WBGene00009982	F53F1.4		cuticlin				F22E5.1	WBGene00017703	F22E5.1
F55H2.2	WBGene00010130	vha-14	vha-14 encodes an ortholog of subunit D of the cytoplasmic (V1) domain of vacuolar proton-translocating ATPase (V-ATPase); VHA-14 is a predicted cytosolic rotor (stalk) component.	Membrane-associated atpase gamma chain				F23B2.12	WBGene00003957	pcp-2		lysosomal carboxypeptidase
F57F4.3	WBGene00001581	gfi-1	gfi-1 encodes a protein that contains 21 ET modules; interacts with unc-68 in yeast two-hybrid assays.					F25A2.1	WBGene00017764	F25A2.1
F57F4.4	WBGene00019017	F57F4.4						F31F4.11	WBGene00017960	F31F4.11
F57F5.1	WBGene00010204	F57F5.1		cysteine protease				F33H12.5	WBGene00005548	sri-36		7TM chemoreceptor, sri family
F58G1.4	WBGene00010266	dct-18						F35E12.7	WBGene00009431	dct-17
K06G5.1	WBGene00010605	K06G5.1						F35E8.11	WBGene00000412	cdr-1	cdr-1 encodes a member of the cadmium-inducible lysosomal family that affects susceptibility to cadmium toxicity; expressed in intestinal cells.	glutathione S-transferases
K12H4.7	WBGene00019682	K12H4.7						F36G9.12	WBGene00009488	oac-20
LLC1.2	WBGene00010793	LLC1.2						F37B1.8	WBGene00001767	gst-19		glutathione S-transferase
R11H6.1	WBGene00003982	pes-9	pes-9 encodes a zinc metallopeptidase; pes-9 was originally identified in a promoter trap screen for sequences that direct reporter gene expression in specific cell types during C. elegans development; pes-9 sequences direct expression in a limited number of cells in the early embryo and in putative head and tail hypodermal cells in adults; after some confusion, the pes-9 reporter gene fusion was…	Yeast hypothetical 52.9 KD protein like				F37B4.7	WBGene00018138	folt-2	folt-2 encodes a putative folate transporter; FOLT-2 is orthologous to human SLC19A1 (OMIM:600424), SLC19A2 (OMIM:603941, mutated in thiamine-responsive megaloblastic anemia syndrome), and SLC19A3 (OMIM:606152, mutated in biotin-responsive basal ganglia disease); heterologously expressed FOLT-2 does not significantly transport folate; FOLT-2 has no obvious function in mass RNAi assays, perhaps be…	folate transporter
T10B10.1	WBGene00000618	col-41	col-41 encodes a cuticle collagen.	collagen				F38B6.5	WBGene00000745	col-172		cuticular collagen
T14B4.7	WBGene00001072	dpy-10	A cuticle collagen protein that afffects body morphology and movement and genetically interacts with the sqt-1 collagen gene.					F42E11.3	WBGene00009633	F42E11.3
T18H9.2	WBGene00000215	asp-2	asp-2 encodes aspartic protease.	protease				F49F1.1	WBGene00018643	F49F1.1
T25C8.2	WBGene00000067	act-5	an ortholog of human cytoplasmic actin; and is expressed only in microvillous intestinal cells and excretory cell.	Actins				F49F1.7	WBGene00018647	F49F1.7
VC5.3	WBGene00003786	npa-1	npa-1 encodes a large polyprotein precursor that is posttranslationally cleaved to multiple units of ~14.5kDa, each of which is a strong binding protein for fatty acids and retinol (Vitamin A); the lipid binding sites of NPA-1-derived peptides are unusually apolar; NPA-1-derived peptides probably are carrier proteins that enable distribution of these lipids within nematodes; NPA-1-derived peptide…					F49H6.13	WBGene00009914	F49H6.13
W04B5.3	WBGene00021020	W04B5.3						F55G11.5	WBGene00010125	dod-22
W04E12.8	WBGene00012253	clec-50		Lectin C-type domain short and long forms (2 domains)				H25K10.1	WBGene00010411	H25K10.1
Y22F5A.4	WBGene00003090	lys-1	lys-1 encodes a putative lysozyme, whose overexpression increases resistance to infection by Serratia marcescens; lys-1(RNAi) animals have normal resistance to S. marcescens, perhaps because of genetic redundancy with the LYS-1 paralogs LYS-2 to -8 and LYS-10; in uninfected animals, LYS-1 is expressed in the intestine and in IL1/IL2 neurons, along with a few unidentified head neurons; in intestin…					K07C6.3	WBGene00019471	cyp-35B2		cytochrome P450
Y32F6A.5	WBGene00012530	Y32F6A.5						K08D8.4	WBGene00010658	K08D8.4
Y38F1A.6	WBGene00012608	Y38F1A.6		Iron-containing alcohol dehydrogenases				K09E10.2	WBGene00019580	oac-58
Y38H6C.1	WBGene00012615	dct-16						M02H5.11	WBGene00005258	srh-35		7TM chemoreceptor, srh family
Y39B6A.1	WBGene00012664	Y39B6A.1						M04C3.2	WBGene00010851	M04C3.2
Y51F10.7	WBGene00021768	Y51F10.7						R102.1	WBGene00011288	R102.1
Y54G2A.6	WBGene00021872	clec-85		clec family, C-type lectin				T02B5.1	WBGene00011362	T02B5.1		carboxylesterase
Y55B1AR.1	WBGene00002269	lec-6	lec-6 encodes a 'proto' type galectin (beta-galactosyl-binding lectin) containing a single carbohydrate recognition domain; by homology, LEC-6 may play roles in cell adhesion and aggregation, proliferation, or programmed cell death, but as loss of lec-6 activity via large-scale RNAi screens does not result in obvious abnormalities, the precise role of LEC-6 in C. elegans development and/or behavi…					T06G6.7	WBGene00005835	srw-88		7TM chemoreceptor, srw family
ZK1127.10	WBGene00022856	cth-2	ZK1127.10 encodes a putative cystathionine gamma-lyase; ZK1127.10 is orthologous to human CTH (OMIM:607657, mutated in cystathioninuria), extremely similar to its paralog F22B8.6, and also paralogous to C12C8.2; either ZK1127.10, or F22B8.6, or both proteins weakly inhibit DHC-1 in vivo; ZK1127.10 is expressed in both larval and adult hypodermis, anal depressor muscle, and body wall muscle, as we…	cystathionine gamma-lyase				T12A7.4	WBGene00011725	lips-5		lipase
								T13A10.10	WBGene00000005	aat-4	aat-4 encodes a predicted amino acid transporter catalytic subunit; unlike catalytic subunits in other organisms, however, AAT-4 does not contain the highly conserved cysteine residue known to facilitate covalent interaction with a glycoprotein subunit, suggesting that AAT-4 does not require this residue for heterodimer formation or, alternatively, does not require the glycoprotein subunit for fu…
								T16G1.6	WBGene00011800	T16G1.6
								T16G12.1	WBGene00011803	T16G12.1		Aminopeptidase
								T25E12.12	WBGene00012027	fbxa-127
								T25E12.13	WBGene00012028	srz-99		DUF-216 family
								T27C5.8	WBGene00012081	T27C5.8
								W07A12.8	WBGene00012325	W07A12.8
								Y18H1A.12	WBGene00000624	col-47	col-47 encodes a cuticle collagen.
								Y32B12A.3	WBGene00012518	Y32B12A.3
								Y38E10A.5	WBGene00012583	clec-4
								Y39B6A.41	WBGene00012699	Y39B6A.41
								Y46C8AL.2	WBGene00021580	clec-174
								Y47H9C.1	WBGene00012947	Y47H9C.1
								Y54F10BM.11	WBGene00021865	fbxa-66
								Y54G9A.4	WBGene00013207	Y54G9A.4
								Y57G11C.41	WBGene00013330	Y57G11C.41
								Y67A10A.8	WBGene00013457	paqr-3
								Y75B8A.28	WBGene00013559	Y75B8A.28
								Y82E9BL.4	WBGene00022321	fbxa-25
								Y94H6A.2	WBGene00022375	Y94H6A.2
								ZK1193.4	WBGene00022860	ZK1193.4
								ZK228.3	WBGene00013946	ZK228.3
								ZK228.4	WBGene00013947	ZK228.4
								ZK899.4	WBGene00006534	tba-8	tba-8 encodes a member of the alpha tubulin family with high similarity to the human tubulin alpha-6 chain; expressed in some neurons with occasional expression in the hypodermis.	tubulin alpha chain
