# Supplementary material for: A Comprehensive Analysis of Gene Expression Changes Provoked by Bacterial and Fungal Infection in C. elegans
Source: PLoS One. 2011 May 13;6(5):e19055. doi: 10.1371/journal.pone.0019055 (PMC3094335; doi:10.1371/journal.pone.0019055)
Supplement: Table S16 — Genes regulated by E. faecalis or P. luminescens infection. Genes up-regulated after E. faecalis (A) or P. luminescens (B) infection: genes shared between data sets. Gene lists are based on WS210. (XLS) [file pone.0019055.s020.xls]

## Sheet: TableS16A
Genes up-regulated after E. faecalis infection: genes shared between datasets
Technique	RNA-seq only	Tiling arrays only	Oligo-arrays only	Tiling arrays + RNA-seq	Tiling arrays + Oligo-arrays	RNA-seq + Oligo-arrays	all three techniques
	1987	2919	393	995	99	66	75
	4R79.1	AC3.2	AC3.4	AC3.1	C02E7.7	B0222.7	C03G6.15
	AC3.10	AC8.10	B0035.10	AC3.3	C03B1.6	C01G12.6	C06B3.3
	AC3.6	AC8.11	B0035.13	AC3.8	C03C10.9	C09D1.1	C14C6.2
	AC7.1	AC8.3	B0222.6	AH10.1	C05H8.1	C10E2.6	C15A11.1
	AH6.10	AC8.4	B0252.3	AH10.3	C06B8.2	C15A11.3	C15C8.3
	B0024.15	AH6.6	B0286.4	B0024.1	C15B12.6	C18D1.2	C18A3.4
	B0024.3	AH9.6	B0302.4	B0034.3	C18G1.2	C23G10.6	C18E9.7
	B0024.6	B0019.1	B0350.2	B0205.10	C24B9.9	C27D8.1	C18H7.2
	B0034.4	B0034.7	B0432.12	B0207.12	C25B8.4	C29G2.5	C29E4.7
	B0034.5	B0047.1	B0464.9	B0228.4	C28C12.5	C34B2.3	C31H5.1
	B0205.4	B0205.14	C01G10.11	B0238.13	C34F6.10	C39E9.10	C32E12.1
	B0207.1	B0205.8	C01G5.9	B0244.10	C36C5.15	C44B7.6	C42D8.5
	B0207.5	B0207.11	C02A12.4	B0261.6	C39E6.2	C47E12.6	C45G9.6
	B0207.7	B0207.3	C02C6.2	B0280.13	C41D11.6	C50F7.5	C49G7.3
	B0212.6	B0213.16	C02F4.1	B0285.6	C44C8.6	C52E4.1	C50B6.7
	B0213.10	B0213.6	C03B8.4	B0286.2	C46H11.2	F10A3.2	F07C3.7
	B0213.12	B0213.7	C03D6.4	B0304.7	C49A9.5	F15D3.4	F13H6.3
	B0218.5	B0213.9	C04E6.7	B0379.7	C52E2.8	F18A1.1	F21F3.1
	B0218.6	B0218.1	C05C10.4	B0393.5	DH11.5	F23H12.4	F28A12.4
	B0218.7	B0222.2	C05E4.9	B0412.2	F07H5.8	F23H12.6	F28B4.3
	B0222.1	B0222.3	C06A5.4	B0432.1	F10G8.5	F25H8.6	F28D1.5
	B0222.10	B0222.5	C06G3.5	B0491.8	F11D5.6	F26D2.13	F32G8.6
	B0222.4	B0222.8	C06G4.2	B0495.1	F13D12.8	F31F7.1	F36H5.2
	B0238.12	B0228.9	C07A9.7	B0495.4	F14D7.7	F38G1.1	F37A4.5
	B0240.1	B0238.7	C07G3.5	B0507.7	F17E9.11	F41E6.11	F41H10.7
	B0240.2	B0238.8	C08G5.2	B0507.9	F18A12.8	F41G4.7	F46A9.2
	B0240.3	B0244.11	C09F5.1	B0511.4	F18E9.6	F44B9.1	F52B11.3
	B0244.5	B0244.2	C09G12.3	B0564.3	F19B2.5	F44C4.3	F54D8.1
	B0250.1	B0244.6	C10C5.1	BE10.1	F21C10.10	F44F4.7	F54F11.2
	B0250.9	B0244.7	C10H11.4	C01A2.7	F21H11.3	F45E4.6	F54F3.1
	B0252.5	B0272.1	C11D2.1	C01B12.5	F23H12.8	F47E1.3	F57C7.4
	B0280.11	B0280.4	C13F10.5	C01B9.1	F25C8.3	F48C11.1	F58B3.2
	B0280.12	B0281.1	C13G3.3	C01G10.1	F25E2.4	F48F5.2	F58D2.2
	B0280.7	B0281.3	C14B1.5	C02A12.1	F26A10.2	F49E10.4	F59D6.3
	B0294.1	B0284.1	C14C6.5	C02B8.3	F26A3.4	F53B3.3	H32C10.3
	B0294.3	B0284.4	C14E2.5	C02B8.5	F27E5.1	F53B6.4	K01H12.2
	B0304.3	B0285.7	C15F1.7	C02C2.4	F32A7.3	F53F1.5	K05F1.7
	B0331.2	B0310.6	C16B8.3	C02D5.2	F32H5.1	F54D10.4	K08F4.8
	B0344.2	B0348.1	C16C2.2	C02D5.3	F36D3.9	F57F5.1	K10B2.2
	B0348.5	B0350.3	C16C8.13	C02E7.1	F37A4.7	K01A2.11	K10C2.1
	B0348.6	B0353.1	C17H12.13	C03A3.1	F38C2.1	M28.6	K10C2.3
	B0361.11	B0361.4	C17H12.6	C03A3.3	F44A2.3	R03G5.1	K11D2.2
	B0365.7	B0365.5	C18B2.5	C03A7.14	F52H3.7	R10F2.1	K11G12.2
	B0393.4	B0379.6	C18E9.9	C03A7.9	F53A9.1	T01B11.4	R02E12.6
	B0393.7	B0391.4	C18F10.9	C03G6.12	F53A9.7	T02G5.2	R08E3.1
	B0395.2	B0391.6	C23H4.1	C03G6.14	F53A9.9	T05C3.2	T06D8.3
	B0412.1	B0391.9	C24H11.8	C03G6.17	F54D10.9	T06E4.10	T09E11.4
	B0432.5	B0395.1	C25A11.4	C04E12.2	F54D8.3	T10H4.9	T09F5.9
	B0454.6	B0403.5	C25D7.2	C04E12.4	F56C4.2	T13F2.11	T13H5.3
	B0454.7	B0410.1	C26B9.1	C04F12.7	F57A8.1	T20G5.5	T14B4.7
	B0454.8	B0416.7	C26H9A.2	C04G2.4	F58B3.1	T21C9.9	T16A9.5
	B0462.1	B0432.11	C28H8.2	C04G6.1	F58E1.4	T23B3.5	T20F5.4
	B0491.4	B0432.14	C28H8.7	C04G6.10	F58G6.7	T23D5.7	T23B3.4
	B0496.2	B0454.10	C29E4.2	C05B5.2	F59A1.6	T28H11.1	T25B6.2
	B0507.1	B0454.2	C31B8.13	C05D12.1	H36L18.2	W05G11.6	T25B9.5
	B0507.11	B0491.3	C31C9.2	C05D12.3	K05F1.2	Y113G7C.1	T25C12.3
	B0511.2	B0495.10	C32A3.1	C06A12.5	K07A1.3	Y44A6D.6	T28F3.8
	B0524.4	B0496.3	C32D5.9	C06A5.2	K07C11.10	Y54E10BL.2	VC5.3
	B0547.4	B0507.10	C33D3.5	C06A6.7	K07F5.2	Y54G11A.13	W03G1.5
	B0554.5	B0507.2	C34F11.6	C06C3.3	K08C7.5	Y57G11A.2	W03G1.7
	B0554.7	B0507.3	C35E7.9	C06E4.3	K08D12.6	Y65B4BR.6	W05E10.4
	B0563.2	B0507.6	C36B7.3	C06H2.5	K12F2.2	Y6B3B.11	W07B8.5
	BE10.2	B0507.8	C40H1.5	C07A9.4	M01A8.2	ZC247.2	Y16B4A.2
	C01B10.4	B0513.6	C42C1.6	C07A9.8	M162.2	ZC395.4	Y39A1A.18
	C01B10.6	B0513.9	C43D7.5	C07D10.3	R05F9.3	ZC404.11	Y39B6A.1
	C01B12.3	B0524.2	C43H6.1	C07D8.2	R06C1.4	ZK507.1	Y39B6A.24
	C01B7.3	B0524.3	C43H6.7	C07E3.4	R08C7.8		Y40D12A.2
	C01F1.4	B0545.3	C44C10.1	C07F11.2	T04A8.4		Y46C8AR.1
	C01F1.5	B0546.5	C44C3.2	C08B6.4	T04D3.4		Y48C3A.11
	C01G12.10	B0547.2	C44H9.5	C08E3.15	T05B4.9		Y75B7AR.1
	C01G12.2	B0554.4	C45B2.6	C08F1.4	T08A9.9		ZC449.5
	C01G12.8	B0554.6	C45G7.4	C08F11.1	T09F3.1		ZK112.1
	C01G5.2	B0564.4	C46F2.1	C08F11.14	T23H4.2		ZK1251.6
	C01G5.3	C01A2.1	C49F5.6	C08F11.3	T25C12.2		ZK154.1
	C01G5.4	C01A2.6	C52B9.7	C08F11.8	T25G12.11		ZK742.3
	C01G8.1	C01B10.1	C53B7.3	C08H9.4	T27C10.1
	C01H6.1	C01B10.5	C53D5.4	C09B7.1	W03A5.3
	C02D4.1	C01B4.7	C54C6.5	C09B9.4	W06B11.4
	C02D4.2	C01B7.5	C54D2.5	C09B9.7	W07G4.5
	C02D5.1	C01B7.6	C54G4.7	C09D1.2	W08D2.4
	C02E7.4	C01C10.1	C55A1.6	C09E7.10	Y105C5B.3
	C02E7.5	C01C10.2	C55F2.1	C09G1.5	Y116F11B.3
	C02F12.1	C01C10.3	C56E6.3	C09G12.17	Y116F11B.6
	C02G6.1	C01F4.2	C56G7.1	C09H10.9	Y119D3B.12
	C02H7.2	C01F6.6	D1014.3	C09H5.6	Y43C5A.1
	C03B1.2	C01G10.6	D1081.6	C10C5.5	Y43F8B.3
	C03C10.2	C01G12.11	D1086.18	C10G11.8	Y46H3A.3
	C03G6.13	C01G6.1	D2089.2	C10G8.5	Y51A2D.19
	C03H5.6	C01H6.4	DY3.4	C10H11.3	Y61B8B.2
	C04A11.1	C01H6.8	E01B7.2	C11D2.2	Y67D8C.1
	C04C3.2	C02A12.2	E01F3.1	C12D5.4	Y73F8A.1
	C04E12.12	C02A12.8	E01G4.3	C12D8.19	Y7A5A.3
	C04E6.10	C02B10.6	E02C12.11	C13B9.4	Y8G1A.1
	C04E6.2	C02B4.1	E02C12.9	C14A11.5	Y9C9A.18
	C04E6.5	C02B4.4	E04A4.7	C14A6.2	ZK228.7
	C04F5.2	C02B8.6	E04F6.3	C14B9.1	ZK354.11
	C04G2.2	C02E7.10	E04F6.9	C14C11.1	ZK616.8
	C04G2.8	C02E7.9	EEED8.8	C14C11.8	ZK666.2
	C04G2.9	C02F12.3	F01F1.2	C15B12.5	ZK795.1
	C04G6.7	C02F12.7	F01F1.9	C15C6.2
	C04H5.3	C02F5.10	F01G4.6	C15C8.2
	C05B5.6	C02F5.11	F07D10.1	C15C8.7
	C05C12.1	C02F5.12	F07H5.4	C15H11.10
	C05C12.5	C02G6.2	F08B6.2	C15H9.3
	C05C9.1	C02H6.2	F08H9.8	C16B8.2
	C05C9.2	C02H7.3	F09B12.3	C16C10.9
	C05C9.3	C03A7.11	F09E10.3	C16C4.4
	C05D10.2	C03A7.12	F09E8.1	C16C4.5
	C05D11.6	C03A7.13	F09G8.3	C16C8.2
	C05D2.3	C03A7.7	F10E9.8	C16C8.8
	C05E11.4	C03A7.8	F10G2.9	C16D9.2
	C05E11.7	C03B1.1	F13B12.5	C17B7.10
	C05E4.11	C03B1.10	F13B9.8	C17B7.8
	C05E4.4	C03B1.4	F13E9.2	C17E7.5
	C06A12.4	C03B8.2	F13G3.9	C17E7.6
	C06A8.1	C03D6.1	F13H10.4	C17E7.7
	C06A8.6	C03F11.1	F14B6.1	C17G10.3
	C06A8.7	C03F11.4	F14B8.4	C17H1.6
	C06B3.8	C03G5.7	F14F9.2	C18C4.1
	C06C3.8	C03G6.2	F16C3.1	C18F10.8
	C06C6.6	C03G6.5	F19B10.11	C18H2.5
	C06E1.3	C03G6.7	F19H8.3	C18H7.4
	C06E1.4	C03G6.8	F20A1.10	C18H9.5
	C06E1.7	C04A11.5	F21C10.11	C24D10.7
	C06E2.1	C04A2.1	F21F8.3	C24G6.7
	C06E7.1	C04C3.4	F21F8.7	C25F6.7
	C06E7.6	C04E12.10	F21H7.2	C25G6.5
	C06G1.1	C04E12.11	F22D6.2	C26B2.3
	C06G1.2	C04E6.12	F22F4.2	C26B2.4
	C07C7.1	C04E6.13	F25B4.2	C26B2.8
	C07E3.5	C04E6.3	F26E4.11	C26D10.5
	C07G1.1	C04E6.4	F27C1.4	C26G2.1
	C07G1.2	C04E7.4	F27C1.7	C27A7.4
	C07G3.10	C04F12.8	F27D4.5	C27C12.6
	C07G3.3	C04F2.1	F29C4.7	C27F2.2
	C08F11.10	C04F2.4	F32B5.6	C27H5.8
	C08F8.6	C04G6.5	F35B3.4	C27H6.1
	C08G9.2	C04G6.6	F35C5.6	C28C12.4
	C08H9.1	C04H5.8	F35E2.5	C28D4.1
	C08H9.10	C05B5.1	F35H12.3	C28D4.5
	C08H9.11	C05B5.3	F36A2.3	C29G2.3
	C08H9.12	C05B5.7	F36G9.10	C30A5.4
	C08H9.13	C05B5.9	F36H9.4	C30B5.7
	C08H9.14	C05C12.3	F38A1.13	C30F12.1
	C08H9.5	C05C12.4	F39H12.2	C30G12.3
	C08H9.6	C05D11.4	F39H2.1	C30G4.3
	C08H9.7	C05D11.5	F39H2.2	C30H6.2
	C09B8.3	C05D9.2	F40F12.7	C30H6.3
	C09B8.4	C05D9.3	F40F4.4	C31C9.1
	C09B9.3	C05D9.4	F40F4.6	C31H1.2
	C09D4.3	C05D9.9	F40G12.2	C32B5.13
	C09E8.2	C05E4.6	F40G9.15	C32D5.14
	C09E8.3	C05E7.1	F41B5.10	C32E12.3
	C09F12.2	C05E7.3	F41E6.1	C32E8.4
	C09F12.3	C06A12.8	F41F3.3	C33A12.13
	C09F9.1	C06A8.8	F42F12.1	C33A12.6
	C09G1.1	C06A8.9	F42H10.2	C33F10.11
	C09G1.2	C06B3.10	F43E2.7	C33F10.5
	C09G12.1	C06B3.13	F43G6.10	C33G8.5
	C09G5.1	C06B8.1	F43G6.3	C34C6.3
	C09G5.6	C06B8.11	F44A2.1	C34D4.3
	C09H10.8	C06B8.6	F45D11.10	C34F11.4
	C09H5.2	C06C3.6	F46B6.10	C34F11.5
	C09H5.4	C06C6.2	F46C3.4	C35D10.14
	C09H5.7	C06C6.3	F46C3.5	C35D10.15
	C10A4.5	C06C6.7	F46F11.5	C35E7.2
	C10A4.7	C06E1.6	F46H5.2	C36A4.2
	C10C6.2	C06E1.8	F48F5.3	C36A4.3
	C10F3.3	C06E2.9	F52A8.1	C36C9.5
	C11E4.2	C06E4.2	F52B10.1	C36H8.2
	C12C8.2	C06E4.7	F52D10.3	C37C3.12
	C12D12.2	C06E7.2	F52H3.3	C38C3.7
	C12D12.3	C06E8.3	F53A2.3	C39B5.11
	C12D5.10	C06G1.5	F53A9.6	C39B5.12
	C12D5.9	C06G3.3	F53A9.8	C39H7.1
	C12D8.18	C06G4.6	F53F10.2	C40A11.1
	C12D8.8	C06G8.1	F53H4.5	C40H1.3
	C13C12.2	C06H5.2	F54C9.10	C40H1.8
	C13D9.7	C07A9.11	F54C9.3	C40H5.4
	C14A4.15	C07A9.6	F54D5.3	C40H5.7
	C14A6.3	C07B5.6	F54D5.7	C41G6.14
	C14C10.1	C07D10.1	F54E2.6	C41G7.6
	C14C11.2	C07D10.6	F55F3.3	C41H7.7
	C15A7.4	C07D8.5	F56B3.8	C43E11.6
	C15B12.4	C07E3.3	F56C11.6	C43F9.5
	C15C7.4	C07G1.7	F56D1.5	C43F9.6
	C15C8.5	C07G3.2	F56F10.3	C43H6.6
	C15H11.13	C07H6.3	F57F4.3	C44B11.1
	C15H11.2	C07H6.7	F58A6.11	C44B7.3
	C15H9.2	C08B11.4	F58D5.2	C44C1.5
	C16A11.1	C08B6.1	F58E1.9	C44F1.2
	C16A11.7	C08B6.14	F58H1.4	C44H9.1
	C16A11.8	C08C3.1	F59C12.2	C44H9.2
	C16C4.14	C08C3.3	F59F4.2	C45E5.1
	C16C8.18	C08E3.1	H06O01.1	C45E5.4
	C16D6.2	C08E3.11	H10E21.4	C45G9.9
	C16D9.1	C08E3.12	H22K11.1	C46A5.3
	C16D9.5	C08E3.13	H27D07.5	C46E1.2
	C16E9.4	C08E3.3	H28G03.1	C46E10.8
	C17A2.8	C08E3.8	H34I24.2	C46H11.7
	C17B7.2	C08E8.1	JC8.8	C47A10.1
	C17B7.4	C08E8.11	K01A2.8	C47A10.5
	C17C3.12	C08E8.2	K02B12.7	C47E12.11
	C17C3.18	C08F1.11	K03H1.3	C47E8.6
	C17C3.6	C08F1.5	K04A8.6	C48A7.1
	C17D12.5	C08F11.13	K04F1.13	C48B6.8
	C17D12.6	C08F11.7	K04F10.4	C48D5.1
	C17E7.13	C08F8.9	K05C4.6	C49C3.4
	C17E7.8	C08G5.6	K05C4.7	C49F5.1
	C17H1.9	C08G5.7	K05F6.2	C49F5.4
	C17H11.1	C09B9.1	K06A5.3	C49G7.4
	C17H12.12	C09B9.6	K06G5.1	C49G7.8
	C17H12.3	C09C7.1	K07B1.8	C50C3.2
	C17H12.5	C09D4.1	K08B5.1	C50F2.5
	C18A11.7	C09E10.2	K08G2.6	C50F4.10
	C18B10.6	C09E7.1	K08H10.7	C50H11.15
	C18B2.1	C09E7.5	K08H2.4	C50H2.12
	C18B2.2	C09F9.2	K09C6.2	C50H2.4
	C18C4.2	C09G12.5	K09E9.1	C52E4.7
	C18D11.7	C09G9.5	K09F5.6	C53A5.4
	C18D4.2	C09H5.1	K10G6.3	C53A5.9
	C18D4.6	C09H5.3	K10H10.6	C53B4.7
	C18E3.1	C09H5.5	K11G12.7	C53C9.2
	C18E3.4	C09H6.2	K11G9.6	C54D10.3
	C18E3.7	C10A4.1	K11H12.3	C54F6.10
	C18E9.5	C10C5.2	K12D12.5	C54F6.8
	C18E9.8	C10C6.7	K12G11.3	C54G4.2
	C18F10.2	C10E2.5	K12H4.7	C54G4.4
	C18F10.5	C10F3.6	M01E5.1	C54G7.3
	C18G1.6	C10G11.3	M01F1.3	C55A1.14
	C18G1.8	C10G11.9	M01F1.8	C55C2.5
	C18H9.8	C11D9.1	M03A8.1	C55C3.1
	C23G10.1	C11E4.3	M04C7.1	C55C3.8
	C23H5.7	C11E4.6	M05D6.5	C56A3.3
	C23H5.9	C11E4.8	M163.4	D1005.6
	C24A3.1	C11G10.2	M60.4	D1007.13
	C24A8.1	C11H1.7	R02F2.1	D1009.3
	C24B5.3	C11H1.9	R02F2.4	D1022.3
	C24D10.2	C12C8.1	R06A10.1	D1022.9
	C24F3.3	C12D12.4	R07E3.5	D1044.8
	C24F3.5	C12D12.5	R07E4.6	D1054.9
	C24G7.1	C12D5.7	R07G3.1	D1079.1
	C24G7.2	C12D5.8	R08E3.3	D2005.2
	C24H11.4	C12D8.15	R10E11.2	D2023.3
	C25A8.5	C12D8.17	R10E4.1	D2062.1
	C25D7.4	C12D8.4	R11.4	D2096.6
	C25E10.2	C12D8.6	R12B2.5	DH11.2
	C25E10.3	C13A10.1	R13H4.5	DY3.5
	C25E10.4	C13A2.11	T01B6.1	E02C12.10
	C25E10.5	C13A2.4	T01E8.4	E02C12.6
	C25G4.6	C13A2.5	T01G1.2	E02H4.7
	C25G4.8	C13A2.6	T01G9.6	E03A3.6
	C25G6.3	C13A2.7	T02G5.7	E03H12.6
	C25H3.15	C13C4.1	T05A8.4	E03H4.11
	C25H3.16	C13C4.3	T05E11.6	E04F6.7
	C26C6.4	C13C4.5	T05F1.6	EGAP2.3
	C26C6.7	C13D9.3	T07H6.3	F01D4.4
	C26F1.6	C13F10.1	T08B2.7	F01D4.7
	C27A2.7	C13G3.1	T08G11.3	F01D5.7
	C27A7.2	C14A4.13	T08G5.10	F01G10.5
	C27A7.7	C14A4.6	T12B5.13	F02C12.2
	C27B7.6	C14A4.7	T12F5.3	F02G3.1
	C27D6.11	C14A6.6	T12G3.1	F07A5.5
	C27D8.2	C14C10.7	T13A10.1	F07H5.6
	C27D9.1	C14C11.4	T14G10.8	F07H5.9
	C27H5.7	C14C6.12	T14G12.4	F08A10.1
	C28F5.2	C14C6.3	T15B12.1	F08C6.1
	C28H8.5	C14E2.4	T15B7.7	F08D12.3
	C28H8.8	C14E2.6	T15B7.8	F08G2.6
	C29A12.6	C14F11.3	T15D6.11	F08H9.9
	C29E4.10	C14F11.5	T15D6.3	F09B12.1
	C29E4.9	C14F5.3	T18H9.2	F09C12.1
	C29E6.4	C15B12.1	T18H9.4	F09C3.2
	C29F3.1	C15B12.2	T20B5.2	F09C6.1
	C29F3.2	C15B12.3	T21B4.7	F09C6.11
	C29F4.3	C15B12.8	T21C9.3	F09C6.13
	C29F5.2	C15B12.9	T21H3.1	F09E5.4
	C29F7.6	C15C7.5	T22C8.5	F09G2.6
	C30A5.10	C15C8.1	T22E5.5	F09G8.8
	C30A5.5	C15F1.1	T23D8.9	F10D11.5
	C30D11.1	C15F1.8	T23G5.6	F10D2.5
	C30E1.5	C15H7.3	T24A11.2	F10F2.6
	C30E1.7	C15H7.4	T25C8.2	F10G2.3
	C30F12.6	C15H9.11	T26E4.2	F11A5.13
	C30F2.2	C16C4.10	T26E4.4	F11A5.5
	C30F2.3	C16C4.11	T27A1.6	F11C1.3
	C30G12.1	C16C4.12	T27F7.3	F11G11.9
	C30G12.2	C16C4.15	T28A8.7	F12A10.4
	C30G4.2	C16C4.3	T28D6.9	F12E12.11
	C30G7.3	C16C8.9	T28F4.5	F12F3.1
	C30H6.1	C16D6.3	T28H10.3	F13A7.10
	C30H6.5	C16D9.4	VW02B12L.1	F13B12.3
	C31A11.1	C16D9.6	W01A11.4	F13C5.5
	C31B8.16	C16D9.9	W01A11.5	F13D11.2
	C31H1.5	C16E9.1	W01A11.7	F13D12.9
	C31H2.3	C16H3.1	W02B12.7	F13D2.1
	C32B5.4	C17A2.3	W02B3.6	F13E9.10
	C32B5.8	C17B7.12	W03A5.2	F13E9.8
	C32C4.1	C17B7.9	W03D8.6	F14D7.6
	C32D5.4	C17C3.10	W03F11.3	F14D7.8
	C32E12.2	C17C3.15	W04B5.3	F14F11.1
	C32E8.6	C17C3.4	W04H10.2	F14F4.3
	C32H11.1	C17E7.1	W06F12.2	F14F7.3
	C33A12.14	C17E7.11	W06F12.3	F14H12.1
	C33B4.2	C17F3.1	W07B3.2	F14H12.3
	C33D3.3	C17F3.3	W09G12.8	F14H8.4
	C33F10.1	C17F4.1	Y105C5B.12	F15A4.6
	C33G3.3	C17G1.6	Y105E8A.2	F15A4.8
	C33G3.5	C17H1.3	Y105E8A.3	F16F9.3
	C33G8.12	C17H1.4	Y111B2A.12	F16H6.2
	C33H5.16	C17H1.7	Y111B2A.22	F17B5.1
	C33H5.2	C17H1.8	Y113G7A.9	F17C8.7
	C33H5.4	C17H11.5	Y116A8C.10	F17E9.5
	C34B4.2	C17H12.10	Y116A8C.463	F18E2.1
	C34B7.3	C17H12.9	Y116F11A.1	F19B6.4
	C34D4.1	C18A11.3	Y22F5A.4	F19C7.5
	C34D4.2	C18A3.10	Y34B4A.9	F19C7.6
	C34E10.9	C18A3.6	Y34F4.5	F19C7.8
	C34E11.2	C18B10.8	Y37A1B.2	F20A1.7
	C34F11.1	C18B2.6	Y37E3.15	F21A3.1
	C34F6.1	C18C4.10	Y37E3.3	F21C10.8
	C35A11.4	C18C4.3	Y37H2A.4	F21C10.9
	C35A5.1	C18D1.3	Y38A10A.5	F21D12.1
	C35A5.5	C18D11.2	Y38C1AA.11	F21F8.11
	C35B1.8	C18D4.5	Y38F2AL.4	F21F8.6
	C35C5.11	C18F10.4	Y39A1C.3	F21H7.14
	C35C5.2	C18G1.1	Y39A3B.3	F22B5.3
	C35C5.5	C18G1.3	Y39B6A.19	F22B8.4
	C35D10.2	C18H7.1	Y39B6A.20	F22F4.1
	C36A4.5	C18H7.10	Y39G8B.3	F23D12.3
	C36B7.7	C18H7.11	Y43C5A.2	F23F12.13
	C36C9.4	C18H7.7	Y43D4A.4	F23F12.4
	C36E6.8	C23F12.1	Y43F8B.2	F25A2.1
	C36H8.1	C23H3.7	Y43H11AL.1	F25B3.4
	C37A2.3	C23H3.9	Y45F10A.3	F25D1.2
	C37C3.10	C23H5.2	Y45F3A.9	F25D1.5
	C37H5.11	C23H5.8	Y45G12B.2	F25E2.1
	C38C10.4	C24A1.1	Y45G12C.1	F25E5.10
	C38C6.3	C24A11.2	Y45G5AM.5	F25E5.7
	C38C6.4	C24A8.4	Y46G5A.10	F25F6.1
	C38D9.1	C24A8.5	Y46G5A.4	F25H8.3
	C38D9.6	C24B5.1	Y46H3A.6	F25H9.3
	C38D9.7	C24B9.12	Y48B6A.1	F26A1.8
	C39B10.1	C24B9.14	Y48E1B.5	F26B1.4
	C39B10.2	C24B9.3	Y49E10.16	F26C11.3
	C39B10.5	C24D10.1	Y49F6B.5	F26D10.9
	C39B5.3	C24D10.9	Y51A2A.3	F26D11.10
	C39D10.5	C24H11.2	Y51F10.10	F26F12.4
	C39D10.6	C24H12.8	Y51H7BR.5	F26F2.1
	C39E6.6	C25A8.1	Y51H7BR.7	F26G1.7
	C39E9.2	C25B8.5	Y53G8AM.5	F27C8.1
	C39H7.9	C25B8.6	Y53H1B.2	F27C8.5
	C40A11.8	C25D7.12	Y54E10A.2	F27E5.3
	C40C9.1	C25E10.12	Y54E10A.4	F28D1.3
	C40C9.2	C25F6.2	Y54F10AM.6	F28E10.1
	C40D2.3	C25F9.10	Y54F10BM.3	F28H7.10
	C40H1.7	C25F9.5	Y54G2A.22	F28H7.9
	C40H5.5	C25G6.1	Y54G9A.4	F29C6.1
	C41C4.1	C26B2.5	Y5F2A.4	F29F11.5
	C41C4.3	C26B9.6	Y67H2A.4	F30H5.3
	C41D7.2	C26D10.3	Y6D1A.2	F31D4.6
	C41G6.10	C26D10.6	Y6E2A.9	F31E3.2
	C41G6.2	C26D10.7	Y71F9B.1	F31E8.2
	C41G7.2	C26E1.1	Y71H2AM.12	F31E8.5
	C42C1.2	C26E6.1	Y73B3A.5	F31F7.2
	C42C1.3	C26F1.1	Y75B12B.7	F32A11.3
	C42D4.2	C26F1.7	Y75D11A.2	F32A6.5
	C42D8.4	C27A12.4	Y76B12C.3	F32B4.2
	C43C3.2	C27A2.5	Y82E9BR.9	F32B4.6
	C43D7.8	C27A2.8	Y92H12BL.2	F32B5.4
	C43G2.5	C27A7.1	Y94A7B.1	F32B5.7
	C43H6.9	C27A7.5	Y94H6A.3	F32B6.4
	C44B7.11	C27A7.9	ZC376.7	F32D8.12
	C44B7.8	C27C12.5	ZC376.8	F32E10.7
	C44B9.2	C27D6.4	ZC395.5	F32H5.7
	C44C10.3	C27D8.3	ZC395.7	F33A8.2
	C44C3.7	C27D9.2	ZC412.6	F33D11.2
	C44H4.1	C27F2.7	ZC434.5	F33D11.3
	C45B11.5	C27H5.1	ZC513.10	F33D4.6
	C45B2.4	C27H5.4	ZC513.8	F33H12.4
	C45G9.10	C28A5.3	ZC518.3	F34D10.6
	C45G9.11	C28C12.1	ZK1025.9	F34D6.4
	C45H4.16	C28C12.13	ZK1037.7	F35A5.2
	C45H4.2	C28C12.8	ZK1320.3	F35A5.3
	C46A5.2	C28F5.1	ZK177.8	F35B12.3
	C46A5.4	C28G1.1	ZK218.7	F35B12.4
	C46E1.3	C28H8.6	ZK287.6	F35B12.6
	C46E10.1	C29F3.3	ZK455.1	F35C12.2
	C46E10.5	C29F4.1	ZK593.2	F35D11.10
	C46H11.8	C29F4.2	ZK632.10	F35D11.2
	C46H11.9	C29F5.5	ZK632.8	F35D11.7
	C46H3.3	C29F5.7	ZK643.6	F35D11.8
	C47A4.2	C29F5.8	ZK909.3	F35D2.5
	C47A4.3	C29F9.6		F35E12.2
	C47C12.6	C29G2.2		F35E8.11
	C47E12.9	C29H12.3		F35F10.4
	C47E8.2	C30A5.7		F35H10.3
	C47F8.6	C30E1.3		F36A2.11
	C48C5.1	C30F12.3		F36D3.4
	C48C5.3	C30G4.4		F36D4.4
	C48D1.3	C30G4.5		F36H1.5
	C48D5.3	C30G7.2		F36H5.1
	C48E7.8	C31A11.4		F36H9.1
	C49A1.3	C31B8.1		F37A4.4
	C49A9.1	C31B8.12		F37B4.13
	C49C3.13	C31B8.4		F37C4.2
	C49C8.1	C31C9.3		F37H8.4
	C49C8.4	C31C9.8		F38A1.10
	C49D10.8	C31G12.3		F38A1.5
	C49F5.8	C31H1.6		F38B6.1
	C49H3.1	C31H2.4		F39D8.2
	C50B6.11	C31H5.3		F39E9.12
	C50B6.5	C31H5.7		F40D4.12
	C50B6.6	C32A9.1		F40E10.4
	C50C3.5	C32B5.11		F40F9.3
	C50D2.2	C32B5.3		F41B5.4
	C50D2.3	C32C4.7		F41D9.3
	C50E3.16	C32D5.1		F41E6.8
	C50F4.2	C32D5.2		F41G4.4
	C50F4.8	C32D5.6		F41H10.8
	C50H11.10	C32D5.7		F42A10.7
	C50H11.8	C32E8.7		F42C5.2
	C50H2.5	C32F10.4		F42D1.2
	C52A10.2	C32H11.11		F42E11.3
	C52A11.3	C32H11.8		F42G2.2
	C52D10.3	C33A12.15		F42G2.3
	C52E2.5	C33A12.19		F42G2.4
	C53A3.2	C33A12.2		F43D9.1
	C53B4.1	C33B4.3		F43E2.5
	C53B7.1	C33B4.4		F43H9.2
	C53B7.5	C33B4.5		F43H9.4
	C53C7.1	C33C12.11		F44A2.4
	C53C9.3	C33C12.3		F44B9.10
	C53D6.3	C33C12.4		F44D12.2
	C54A12.2	C33C12.5		F44D12.4
	C54C8.4	C33D12.2		F44E2.4
	C54D10.4	C33D12.6		F45E4.3
	C54D10.9	C33D3.1		F45E4.7
	C54D2.1	C33D9.1		F45G2.2
	C54E4.4	C33D9.3		F45H11.6
	C54F6.12	C33D9.5		F46A8.5
	C54F6.4	C33D9.9		F46A9.3
	C54F6.9	C33E10.10		F46B6.9
	C55B7.12	C33E10.5		F46C5.7
	C55B7.3	C33F10.13		F46E10.1
	C55B7.4	C33F10.9		F46F11.3
	C55B7.6	C33G3.1		F46F3.1
	C55C3.6	C33G8.11		F46G10.6
	C56C10.4	C33G8.2		F47B10.8
	C56E6.5	C33G8.4		F47B3.7
	C56E6.6	C33H5.13		F47C10.4
	C56G2.4	C34B2.11		F47C12.1
	C56G3.2	C34B2.9		F47C12.6
	D1007.1	C34B4.1		F47D12.1
	D1014.1	C34B4.5		F47D12.7
	D1014.5	C34C12.6		F47G4.5
	D1037.5	C34C12.7		F47H4.11
	D1044.3	C34D1.1		F47H4.7
	D1044.7	C34D1.3		F48A11.1
	D1054.12	C34D1.4		F48C11.2
	D1065.5	C34D1.5		F48E3.7
	D1069.1	C34D4.15		F49A5.2
	D1069.4	C34E11.3		F49B2.3
	D1081.5	C34E7.1		F49E10.2
	D2005.6	C34F11.2		F49E12.7
	D2024.4	C34F11.9		F49F1.6
	D2062.7	C34F6.6		F52A8.3
	D2092.3	C34G6.6		F52C6.14
	D2092.6	C34H3.2		F52D2.8
	D2096.3	C35A5.11		F53A9.3
	DH11.1	C35A5.2		F53B1.3
	E01G6.1	C35A5.6		F53B1.4
	E02A10.2	C35A5.7		F53F4.8
	E02C12.2	C35B1.3		F54B11.2
	E02H4.5	C35B1.7		F54C1.9
	E03D2.1	C35C5.8		F54D1.1
	E03G2.4	C35D10.11		F54D1.4
	E03H12.5	C35D10.3		F54D1.5
	E03H4.4	C35D6.10		F54D12.10
	E04A4.2	C35E7.10		F54E2.2
	E04A4.6	C36A4.9		F54E2.3
	EEED8.6	C36B1.1		F54F2.1
	F01D4.3	C36B1.10		F54F3.3
	F01D4.8	C36B7.2		F55A11.5
	F01D5.6	C36B7.4		F55A4.7
	F01E11.1	C36B7.8		F55F3.2
	F01E11.4	C36C5.11		F55F3.4
	F01E11.5	C36C5.12		F55G11.2
	F01G10.10	C36C5.2		F55H12.1
	F01G10.4	C36H8.3		F55H12.3
	F01G10.6	C37A5.1		F55H12.6
	F02A9.1	C37C3.13		F56C4.1
	F02C12.4	C37C3.3		F56D2.8
	F02D8.2	C37H5.13		F56D3.1
	F02D8.3	C37H5.6		F56F11.5
	F02E11.1	C38C3.6		F56H11.1
	F02E9.3	C38C3.8		F56H6.12
	F02H6.1	C38C6.2		F56H6.2
	F02H6.6	C38D4.8		F57B7.2
	F07A11.1	C38D9.5		F57B9.9
	F07A5.2	C38D9.8		F57G4.1
	F07B10.2	C38H2.1		F58A4.11
	F07B10.7	C39B10.4		F58A6.2
	F07B7.12	C39B5.1		F58A6.8
	F07C3.3	C39B5.10		F58A6.9
	F07C4.11	C39D10.11		F58B3.3
	F07E5.1	C39E6.4		F58B4.1
	F07E5.9	C39E9.6		F58E1.6
	F07F6.1	C39E9.7		F58E6.10
	F07F6.5	C39H7.4		F58E6.7
	F07F6.9	C40A11.7		F58F9.6
	F07G11.4	C40C9.3		F58G4.1
	F07G11.9	C40C9.5		F58G6.6
	F07G6.6	C40D2.2		F58G6.8
	F08B4.2	C40H1.9		F58H1.2
	F08D12.2	C40H5.2		F58H7.1
	F08F1.1	C41A3.2		F58H7.3
	F08F8.6	C41C4.10		H03E18.1
	F08G5.2	C41D11.1		H06H21.9
	F08G5.7	C41G6.15		H19J13.1
	F08H9.12	C41G7.7		H20J04.1
	F09A5.2	C42C1.7		H23L24.3
	F09C12.2	C42C1.9		H23N18.1
	F09C12.8	C42D8.8		H23N18.3
	F09C6.2	C42D8.9		H24O09.1
	F09C6.3	C43C3.1		H27M09.4
	F09E10.7	C43F9.9		H27M09.5
	F09E5.10	C43G2.4		H35N09.1
	F09E8.5	C43H6.8		H37A05.2
	F09E8.6	C44B11.3		H43E16.1
	F09F3.10	C44B12.4		K01A6.4
	F09F3.9	C44B12.9		K01D12.14
	F09G2.5	C44B7.4		K01D12.2
	F09G8.4	C44B7.9		K01D12.4
	F09G8.5	C44B9.6		K01H12.3
	F10A3.1	C44C1.3		K02B7.4
	F10B5.3	C44C1.6		K02D3.2
	F10B5.4	C44C10.11		K02E11.1
	F10C2.7	C44C10.6		K02E2.1
	F10D11.6	C44C10.7		K02F3.3
	F10D2.2	C44C10.9		K02F6.1
	F10D2.4	C44C3.1		K03A11.4
	F10E7.10	C44C8.7		K03H1.1
	F10F2.3	C44C8.9		K03H1.13
	F10F2.4	C44E4.6		K04E7.1
	F10F2.7	C44F1.5		K04E7.2
	F10F2.8	C44H4.2		K04F1.12
	F10F2.9	C44H4.4		K04H4.2
	F10G2.7	C44H4.5		K04H4.6
	F10G7.12	C44H9.8		K04H8.3
	F10G7.7	C45B11.3		K05B2.5
	F10G8.9	C45B2.3		K05D4.9
	F11A5.10	C45B2.5		K05F1.6
	F11A5.4	C45B2.7		K06A1.1
	F11C1.4	C45E1.4		K06A9.1
	F11C3.2	C45E5.3		K07C5.7
	F11C7.2	C45G3.4		K07C6.3
	F11C7.3	C45G7.1		K07C6.4
	F11C7.6	C45G7.2		K07E12.1
	F11C7.7	C45G7.3		K07E8.11
	F11D11.11	C45H4.10		K08B12.1
	F11D11.3	C45H4.15		K08C9.1
	F11D11.5	C46C11.4		K08C9.2
	F11D5.7	C46C2.3		K08D8.3
	F11E6.10	C46C2.4		K08D8.4
	F12D9.1	C46E10.2		K08E5.2
	F13A2.2	C46G7.3		K08E7.5
	F13A7.9	C46H11.10		K08F4.6
	F13B12.4	C46H11.6		K08F8.1
	F13C5.3	C47A10.11		K09B11.10
	F13E9.14	C47A10.3		K09C6.7
	F13E9.4	C47A10.7		K09C6.9
	F13G3.8	C47B2.1		K09D9.2
	F13H10.5	C47D12.3		K09F6.4
	F13H10.9	C47E12.10		K09F6.6
	F13H8.5	C47E12.12		K10C8.2
	F13H8.6	C47E8.7		K10C9.7
	F14B6.2	C47E8.9		K10D6.1
	F14B6.4	C47F8.1		K10F12.7
	F14B6.5	C47F8.4		K10G4.13
	F14F8.8	C47G2.2		K10H10.4
	F14F9.1	C48B4.1		K11G9.4
	F14H12.2	C48B4.3		M01B2.2
	F14H3.10	C48B4.8		M01D1.2
	F14H3.8	C48E7.5		M01F1.7
	F15A2.3	C48E7.6		M02B1.4
	F15A2.5	C48E7.9		M02D8.4
	F15A4.5	C49A9.3		M02D8.7
	F15A4.9	C49A9.4		M02G9.1
	F15B9.2	C49A9.7		M03B6.2
	F15E11.4	C49A9.8		M03B6.3
	F15E6.5	C49A9.9		M03E7.4
	F15G9.4	C49C3.10		M03F8.4
	F15G9.6	C49C3.2		M04C3.2
	F15H10.7	C49C8.5		M04C9.1
	F15H10.8	C49F8.1		M04G7.1
	F16B12.1	C49F8.3		M05B5.6
	F16B12.8	C49G7.1		M05D6.4
	F16D3.7	C49G7.11		M151.4
	F16H6.1	C49G7.12		M153.4
	F17A2.1	C49G7.2		M162.8
	F17A2.3	C50A2.3		M163.11
	F17B5.5	C50B6.12		M176.10
	F17B5.6	C50B8.4		M18.1
	F17E9.8	C50B8.5		M195.2
	F18A11.1	C50B8.6		M6.3
	F18A12.1	C50C10.3		M6.4
	F18C12.1	C50C10.7		M7.7
	F18C12.4	C50C10.8		M88.3
	F18C5.1	C50C3.12		R01H2.5
	F18E2.6	C50D2.1		R02C2.7
	F18E3.6	C50D2.4		R02F11.1
	F18E9.7	C50E10.1		R02F2.8
	F18F11.3	C50F7.10		R03A10.6
	F18F11.4	C50H11.4		R04B3.1
	F18G5.4	C50H2.2		R04E5.10
	F19C6.3	C50H2.6		R05F9.12
	F19C7.4	C51E3.7		R06B10.1
	F19G12.7	C51E3.8		R06B9.2
	F20A1.4	C52A11.4		R06C7.10
	F20D1.7	C52B11.4		R07B7.15
	F20D12.3	C52B9.1		R07E3.4
	F20D6.1	C52B9.2		R07E3.6
	F20G2.1	C52B9.9		R08B4.1
	F20G2.4	C52E12.2		R08C7.4
	F20H11.5	C52E2.1		R08D7.7
	F21A3.7	C52E2.6		R08H2.1
	F21D12.3	C52E2.7		R09A8.4
	F21D9.2	C53B4.3		R09B5.4
	F21F3.2	C53B7.6		R09D1.10
	F21F8.10	C53C11.2		R09D1.2
	F21H11.2	C53C11.3		R09E10.5
	F21H7.10	C53C7.3		R09H10.5
	F21H7.5	C53D5.3		R102.1
	F22A3.6	C53D6.11		R102.7
	F22B3.9	C53D6.8		R106.2
	F22B5.5	C54A12.4		R10D12.1
	F22D6.11	C54C8.12		R10E9.2
	F22E10.1	C54C8.2		R10H1.5
	F22E10.2	C54C8.7		R11E3.1
	F22E10.3	C54C8.9		R11F4.2
	F22E5.3	C54D1.1		R11G10.3
	F22F7.3	C54D1.4		R11G11.12
	F22F7.6	C54D1.7		R11G11.14
	F23B12.1	C54D10.10		R12C12.3
	F23B2.12	C54D10.12		R13A5.9
	F23B2.4	C54D10.14		R13H4.3
	F23B2.7	C54D2.4		R13H7.2
	F23C8.1	C54E10.2		R13H9.4
	F23C8.7	C54E10.5		R148.1
	F23F12.8	C54E10.6		R148.7
	F23H11.6	C54E4.3		R155.3
	F23H11.7	C54F6.11		R193.2
	F23H12.9	C54F6.3		R52.3
	F25C8.1	C54G4.3		R52.8
	F25C8.5	C54G4.5		R57.2
	F25D1.3	C54G6.2		R74.2
	F25D1.4	C54G6.3		T01B11.2
	F25E5.2	C55A1.11		T01B7.8
	F25F2.1	C55A1.3		T01C8.3
	F25G6.6	C55A1.7		T01G5.1
	F25H5.7	C55A6.12		T01G5.2
	F25H9.1	C55A6.5		T01G9.3
	F26A1.9	C55B7.10		T02B11.3
	F26A3.5	C56A3.2		T02B11.4
	F26A3.6	C56A3.7		T02D1.4
	F26B1.8	C56E10.1		T02D1.5
	F26D2.10	C56E10.3		T02D1.6
	F26D2.16	C56E10.4		T02E9.2
	F26D2.3	C56G3.1		T04A11.12
	F26E4.5	CC8.1		T04A11.7
	F26F12.6	D1005.3		T04A6.4
	F26F2.6	D1007.3		T04B2.3
	F26F4.2	D1009.4		T05A1.5
	F26G1.6	D1022.2		T05B4.3
	F27B3.2	D1022.4		T05C3.4
	F27C1.1	D1025.4		T05E12.6
	F27C1.11	D1037.3		T05F1.8
	F27C1.3	D1044.2		T05H4.7
	F27C8.2	D1053.4		T06C10.3
	F27E5.4	D1054.5		T06D8.10
	F28A12.1	D1073.1		T06E4.11
	F28D1.8	D1081.2		T07H6.1
	F28E10.4	D2007.3		T08B2.2
	F28G4.2	D2023.1		T09A12.1
	F28G4.3	D2024.2		T09D3.1
	F28G4.4	D2062.2		T09E11.5
	F28G4.5	D2062.5		T09F5.10
	F28H7.11	D2063.1		T10B10.4
	F29C12.1	D2096.10		T10B10.6
	F29C12.5	DH11.4		T10B9.1
	F29D11.1	E01A2.7		T10E9.5
	F29G9.6	E01G4.6		T10E9.6
	F30A10.8	E01G6.3		T10E9.9
	F30B5.8	E01H11.1		T10H9.5
	F31B12.3	E02C12.12		T11F8.4
	F31F4.11	E02C12.8		T11F9.1
	F31F4.18	E02H9.2		T11G6.3
	F31F4.7	E02H9.4		T12A7.9
	F31F6.1	E02H9.8		T12B3.1
	F31F6.6	E03A3.4		T13A10.10
	F32A11.7	E03D2.2		T13A10.11
	F32A5.4	E03H12.2		T13A10.5
	F32B4.1	E03H12.9		T13C2.2
	F32B4.8	E03H4.7		T13F2.12
	F32B5.1	E03H4.8		T14B1.1
	F32B5.2	E04D5.5		T14E8.2
	F32B5.3	EEED8.11		T15D6.10
	F32B6.10	EGAP7.1		T15D6.12
	F32B6.5	EGAP798.1		T15D6.5
	F32D8.1	EGAP9.3		T16D1.2
	F32D8.2	E_BE45912.2		T16G1.5
	F32H2.7	F01D4.6		T16G1.6
	F32H2.9	F01E11.3		T16G1.7
	F32H5.4	F01F1.13		T16G1.8
	F33C8.2	F01G10.7		T16G12.1
	F33D11.4	F02D10.1		T17A3.1
	F33D11.5	F02D10.2		T17H7.4
	F33D11.7	F02D10.7		T18D3.2
	F33D4.3	F02E11.4		T18D3.4
	F33H1.5	F02E8.2		T19C3.6
	F35A5.4	F07A5.4		T19C4.1
	F35A5.5	F07B7.1		T19D12.1
	F35C5.10	F07B7.13		T19D12.5
	F35C5.7	F07B7.14		T19D7.7
	F35C8.3	F07B7.2		T19H12.9
	F35D2.1	F07C3.2		T20B3.12
	F35D2.4	F07C4.10		T20B3.15
	F35E2.6	F07C4.12		T20B3.16
	F35E2.9	F07C4.2		T20C7.2
	F35F10.7	F07C4.3		T20D4.10
	F35G12.6	F07C4.5		T20D4.12
	F35G8.1	F07C6.2		T20D4.15
	F35H10.2	F07C6.6		T20H9.1
	F35H8.1	F07G11.8		T20H9.3
	F36D3.5	F07G6.7		T21B10.6
	F36D4.1	F07G6.9		T21B4.5
	F36F12.1	F07H5.13		T21C12.1
	F36F12.6	F08A8.6		T21D12.11
	F36F2.5	F08B1.1		T21D12.7
	F36G9.5	F08B12.4		T21E8.1
	F36G9.9	F08B4.4		T21F2.1
	F36H1.12	F08D12.7		T21H8.3
	F36H1.3	F08E10.2		T22A3.4
	F36H1.9	F08E10.3		T22B11.2
	F36H12.2	F08F3.9		T22F3.11
	F36H5.10	F08G12.1		T22G5.1
	F37A8.2	F08G12.8		T23D8.2
	F37B1.3	F08G5.3		T23F1.5
	F37B1.8	F08H9.2		T23F1.6
	F37B12.1	F08H9.7		T23F11.2
	F37B4.7	F09A5.1		T23F4.3
	F37C4.8	F09A5.4		T24E12.10
	F37E3.3	F09C12.7		T25E4.1
	F38A1.4	F09C6.8		T25G12.6
	F38A1.7	F09C6.9		T26E4.12
	F38A1.9	F09E5.13		T27A3.3
	F38B2.2	F09E5.16		T27A3.4
	F38B6.2	F09E5.7		T27A3.5
	F38B6.3	F09E8.8		T27E7.1
	F38E11.12	F09F3.1		T28A11.10
	F38E11.4	F09F3.2		T28A11.17
	F38E11.9	F09F3.6		T28B4.2
	F38H4.3	F09F9.4		T28B8.3
	F38H4.4	F09G2.3		T28B8.5
	F39C12.4	F10A3.4		T28C12.1
	F39D8.1	F10A3.5		T28D6.3
	F39D8.4	F10C1.7		T28F3.4
	F39G3.2	F10C1.8		T28F4.1
	F39G3.5	F10C1.9		T28F4.3
	F39G3.6	F10C2.3		T28H11.5
	F40A3.7	F10D2.8		W01C9.3
	F40E12.1	F10E7.3		W02A2.3
	F40E12.2	F10E7.9		W02C12.1
	F40E3.6	F10E9.1		W02D7.12
	F40F12.3	F10E9.12		W02G9.4
	F40F12.4	F10E9.2		W03C9.8
	F40F8.8	F10F2.5		W03D2.6
	F40F9.1	F10G8.2		W03D8.1
	F40G12.10	F11A5.2		W03D8.8
	F40G12.4	F11A5.3		W03F8.1
	F40G12.6	F11A5.6		W03G9.7
	F40H6.6	F11C1.6		W04C9.6
	F41B4.2	F11C7.5		W04G3.2
	F41B5.7	F11D11.10		W04G3.8
	F41C3.11	F11D5.1		W05B2.7
	F41D3.1	F11D5.5		W05B5.2
	F41D3.11	F11E6.1		W05F2.7
	F41D3.2	F11E6.2		W05H5.3
	F41D3.6	F11E6.3		W06D12.3
	F41D9.2	F11E6.4		W06H8.2
	F41D9.5	F11E6.5		W06H8.8
	F41E6.14	F11E6.9		W07B8.1
	F41E7.1	F11F1.5		W07B8.3
	F41E7.3	F11F1.7		W08D2.3
	F41E7.9	F11F1.8		W09C3.6
	F41G3.10	F11G11.14		W09C5.4
	F41G3.12	F11G11.3		W10G11.17
	F41G3.2	F11H8.2		Y102A5B.1
	F41G3.3	F12A10.5		Y105C5A.8
	F41G3.4	F12A10.6		Y105C5B.6
	F41G4.5	F12A10.7		Y105E8A.7
	F42A9.7	F12B6.1		Y106G6A.4
	F42A9.9	F12E12.2		Y106G6G.3
	F42D1.3	F12E12.3		Y106G6G.6
	F42F12.2	F12F6.10		Y113G7A.12
	F42G2.7	F13A2.9		Y116A8C.40
	F42G9.8	F13A7.11		Y119C1B.1
	F43C11.5	F13A7.12		Y119D3B.8
	F43C11.8	F13A7.7		Y17G7B.14
	F43D2.4	F13B10.1		Y18D10A.7
	F43G6.6	F13B6.1		Y18H1A.15
	F43G9.6	F13B6.3		Y1B5A.1
	F44A2.2	F13C5.6		Y1H11.1
	F44C8.7	F13D2.4		Y22D7AL.16
	F44D12.5	F13E9.15		Y25C1A.11
	F44D12.8	F13E9.16		Y27F2A.3
	F44D12.9	F13G3.1		Y32B12B.3
	F44E5.2	F13H8.1		Y32F6A.6
	F44E7.2	F13H8.12		Y32G9A.6
	F44E7.7	F13H8.4		Y34D9A.11
	F44F4.13	F14B4.1		Y37A1B.5
	F44F4.5	F14B8.5		Y37E11AL.4
	F44F4.6	F14B8.6		Y37E11AR.7
	F44G3.10	F14B8.7		Y37E11B.10
	F44G3.2	F14D2.7		Y37E3.13
	F44G3.7	F14D7.10		Y37F4.1
	F44G4.5	F14D7.11		Y37F4.5
	F45B8.3	F14D7.9		Y38C1AA.7
	F45D11.1	F14E5.5		Y38E10A.9
	F45E1.5	F14F11.2		Y38F1A.3
	F45F2.6	F14F3.1		Y38H6C.17
	F45G2.1	F14F7.1		Y38H6C.19
	F46A8.8	F14F8.12		Y39B6A.23
	F46B3.1	F14F8.13		Y39B6A.25
	F46B3.17	F14F8.9		Y39C12A.7
	F46B3.5	F14F9.4		Y39D8A.1
	F46B3.7	F14H12.7		Y39E4B.8
	F46B6.11	F14H3.11		Y39G10AR.16
	F46B6.2	F14H3.9		Y40H4A.1
	F46C5.3	F14H8.6		Y40H4A.2
	F46C8.6	F15A2.6		Y40H7A.5
	F46C8.8	F15A4.1		Y41D4B.24
	F46F5.7	F15A4.3		Y41D4B.6
	F46G11.1	F15A4.4		Y41G9A.4
	F47B7.7	F15A8.1		Y42A5A.4
	F47B8.11	F15A8.6		Y42G9A.3
	F47B8.12	F15B9.6		Y42H9B.1
	F47B8.9	F15B9.7		Y43F8A.2
	F47C10.3	F15B9.9		Y43F8C.16
	F47C10.6	F15D3.1		Y43F8C.5
	F47C10.8	F15D3.3		Y44A6B.3
	F47C12.2	F15D3.6		Y45F10B.10
	F47C12.4	F15D3.8		Y46C8AL.2
	F47E1.2	F15D4.6		Y46C8AL.3
	F47F6.3	F15E11.11		Y46C8AL.4
	F47F6.5	F15G9.1		Y46C8AL.9
	F47G4.7	F15G9.3		Y46C8AR.3
	F47G6.3	F15H10.10		Y46G5A.29
	F47H4.4	F16B12.2		Y46G5A.30
	F47H4.6	F16B3.1		Y47D7A.5
	F48A11.2	F16B3.3		Y48B6A.4
	F48A9.3	F16B4.12		Y48B6A.5
	F48B9.5	F16B4.2		Y48E1B.13
	F48C1.7	F16B4.5		Y48G8AR.2
	F48E3.8	F16B4.9		Y49A10A.1
	F48F5.4	F16D3.6		Y4C6A.2
	F48G7.12	F16F9.2		Y4C6B.2
	F49A5.4	F16G10.1		Y50D4B.3
	F49A5.5	F16G10.9		Y50D4B.4
	F49A5.7	F16H11.2		Y51A2D.5
	F49A5.8	F16H6.5		Y51B9A.6
	F49B2.6	F16H6.8		Y51H4A.10
	F49C12.15	F17A2.10		Y53C10A.3
	F49C5.4	F17A2.11		Y53F4B.19
	F49D11.4	F17A2.4		Y53F4B.32
	F49E11.11	F17A2.7		Y53G8AR.7
	F49E11.3	F17A2.8		Y53H1B.1
	F49E11.4	F17A9.3		Y54E10BR.7
	F49F1.11	F17A9.4		Y54E2A.9
	F52C6.13	F17B5.4		Y54F10AM.2
	F52C6.5	F17C11.2		Y54F10BL.1
	F52D1.3	F17C11.5		Y54F10BM.11
	F52D10.4	F17C8.1		Y54G11A.12
	F52D10.5	F17C8.4		Y54G11A.7
	F52D10.6	F17C8.5		Y54G2A.39
	F52E1.2	F17E5.1		Y57A10A.24
	F52E1.4	F18C5.4		Y57G11B.97
	F52E1.8	F18E2.5		Y57G11C.18
	F52E10.5	F18E3.11		Y57G11C.20
	F52F10.2	F18E3.4		Y57G11C.32
	F52F10.4	F18E3.7		Y57G11C.41
	F52F12.1	F18E9.4		Y57G7A.6
	F52F12.9	F18F11.1		Y57G7A.9
	F52G3.3	F18G5.2		Y58A7A.6
	F52G3.5	F18G5.3		Y58G8A.1
	F52H3.6	F19B10.13		Y59E9AL.6
	F53B1.7	F19B6.3		Y59H11AL.1
	F53B2.3	F19C7.2		Y5H2B.7
	F53B2.5	F19D8.1		Y62H9A.14
	F53B3.6	F19D8.2		Y64G10A.6
	F53B6.2	F19G12.1		Y65B4BR.1
	F53B6.6	F19G12.2		Y67A10A.10
	F53B7.4	F19G12.3		Y67A10A.8
	F53B7.5	F19G12.4		Y69A2AR.19
	F53C3.1	F19H8.5		Y69A2AR.23
	F53C3.3	F20A1.1		Y69E1A.2
	F53C3.5	F20A1.3		Y69E1A.8
	F53F1.7	F20A1.6		Y70G10A.2
	F53F4.4	F20B10.3		Y70G10A.3
	F53F8.2	F20B6.3		Y71H2AM.15
	F53G12.3	F20B6.4		Y73B3A.22
	F54A5.3	F20B6.5		Y73B6BL.26
	F54B11.11	F20C5.2		Y73B6BL.31
	F54B11.7	F20C5.5		Y73B6BL.39
	F54B11.9	F20D12.5		Y73C8C.4
	F54C8.1	F20D12.6		Y73E7A.4
	F54D12.3	F20D6.10		Y73F8A.5
	F54D12.8	F20D6.3		Y75B7AL.1
	F54D5.15	F20D6.6		Y75B8A.3
	F54E2.5	F20D6.9		Y87G2A.15
	F54E4.2	F20E11.15		Y87G2A.16
	F54F11.3	F20E11.5		Y94H6A.1
	F54G8.1	F21A3.4		Y97E10B.10
	F54G8.2	F21C10.3		Y9C9A.3
	F54G8.5	F21C10.4		ZC101.2
	F54H12.7	F21C10.7		ZC123.1
	F54H5.2	F21C3.1		ZC13.10
	F55A12.1	F21D12.2		ZC142.1
	F55B12.1	F21D9.8		ZC204.6
	F55B12.9	F21F3.3		ZC239.15
	F55C10.2	F21H12.3		ZC239.7
	F55C12.6	F21H7.12		ZC317.3
	F55C5.2	F21H7.4		ZC328.2
	F55C5.9	F22A3.5		ZC334.1
	F55D10.4	F22B3.10		ZC334.2
	F55D12.4	F22B5.4		ZC374.2
	F55F8.7	F22B7.1		ZC376.2
	F55G1.12	F22B7.9		ZC443.6
	F55G1.13	F22B8.1		ZC455.1
	F55G11.1	F22B8.6		ZC477.7
	F55G11.9	F22D6.1		ZC581.6
	F56A11.6	F22D6.12		ZC64.4
	F56A12.2	F22D6.15		ZC84.1
	F56D5.3	F22E12.1		ZK105.6
	F56D6.13	F22E12.3		ZK1053.6
	F56D6.14	F22E5.13		ZK1055.5
	F56D6.2	F22E5.7		ZK1067.7
	F56H6.11	F22F1.3		ZK1193.2
	F56H6.5	F22G12.1		ZK1193.3
	F56H9.6	F22G12.2		ZK1193.4
	F57A10.6	F22H10.3		ZK1225.1
	F57A8.6	F22H10.4		ZK1240.8
	F57A8.7	F23A7.5		ZK1248.2
	F57B9.6	F23B12.4		ZK1248.20
	F57F4.1	F23B2.11		ZK1290.2
	F57F4.4	F23C8.13		ZK1290.9
	F57F5.2	F23D12.8		ZK1307.3
	F57G12.2	F23G4.1		ZK1307.7
	F57G8.4	F23H11.8		ZK180.1
	F57H12.4	F25B3.2		ZK218.1
	F57H12.5	F25B3.3		ZK218.5
	F58A6.10	F25B3.5		ZK228.4
	F58A6.5	F25B5.3		ZK262.2
	F58A6.6	F25E2.3		ZK287.1
	F58B3.8	F25E5.13		ZK354.2
	F58B4.2	F25E5.4		ZK354.8
	F58B6.1	F25E5.5		ZK418.7
	F58D12.3	F25F8.1		ZK455.4
	F58D5.7	F25G6.7		ZK484.7
	F58E1.2	F25G6.8		ZK507.4
	F58E6.11	F25H5.1		ZK524.1
	F58E6.3	F26A1.4		ZK593.3
	F58E6.4	F26A1.6		ZK593.9
	F58E6.5	F26C11.2		ZK617.1
	F58F6.1	F26D10.13		ZK622.1
	F58G1.3	F26D10.8		ZK643.1
	F58G1.9	F26D11.12		ZK666.6
	F58G11.4	F26D11.13		ZK666.7
	F58G4.2	F26D11.4		ZK666.8
	F58G4.6	F26D2.14		ZK682.5
	F58G6.4	F26D2.4		ZK742.4
	F58G6.9	F26E4.3		ZK757.3
	F59A1.11	F26F2.3		ZK783.6
	F59A3.8	F26F2.4		ZK809.1
	F59A6.3	F26F2.5		ZK816.4
	F59A6.4	F26F2.8		ZK822.5
	F59A7.1	F26G1.4		ZK84.6
	F59B1.4	F27B3.6		ZK849.1
	F59B1.7	F27D4.4		ZK849.2
	F59B10.3	F27D4.7		ZK863.8
	F59B2.12	F27D9.7		ZK867.1
	F59C6.2	F27D9.8		ZK899.4
	F59C6.8	F28A10.1		ZK930.7
	F59D12.3	F28A10.3		ZK993.1
	F59D12.4	F28A10.8
	F59E11.2	F28B12.1
	F59E12.4	F28C1.2
	F59F3.2	F28C10.1
	F59F5.5	F28C12.5
	F59H6.2	F28C6.10
	H01G02.2	F28C6.4
	H02F09.2	F28C6.9
	H02I12.3	F28D1.4
	H03E18.2	F28D9.4
	H03G16.2	F28E10.5
	H04M03.1	F28F5.3
	H04M03.4	F28F8.1
	H05L14.1	F28F9.1
	H06I04.5	F28H6.2
	H08M01.1	F28H6.6
	H10E21.2	F28H7.7
	H11L12.1	F28H7.8
	H12D21.11	F29A7.1
	H22K11.3	F29B9.12
	H23L24.1	F29C4.4
	H23L24.4	F29G6.2
	H25K10.1	F29G9.4
	H25K10.4	F30A10.12
	H32C10.1	F30A10.2
	H38K22.6	F30F8.2
	H41C03.2	F31A3.3
	H42K12.3	F31A3.4
	JC8.11	F31B12.1
	K01A11.4	F31B9.1
	K01A12.3	F31D4.7
	K01A6.6	F31D5.4
	K01D12.3	F31E3.1
	K01D12.5	F31E9.3
	K02A2.5	F31F4.1
	K02A4.1	F31F4.15
	K02A6.2	F31F4.2
	K02B12.4	F31F4.3
	K02C4.2	F31F4.6
	K02D7.5	F31F6.3
	K02E10.4	F32A11.6
	K02E10.7	F32A5.2
	K02E11.2	F32A5.3
	K02E11.4	F32A5.5
	K02E11.6	F32A6.2
	K02E2.2	F32A6.4
	K02E2.8	F32B6.6
	K02E7.10	F32B6.7
	K02F2.2	F32D1.3
	K02G10.5	F32D1.4
	K03A11.3	F32D1.8
	K03B4.6	F32D8.7
	K03B8.2	F32F2.1
	K03B8.5	F32G8.3
	K03H1.12	F32G8.4
	K03H4.1	F32H2.8
	K03H6.1	F33A8.10
	K03H9.2	F33A8.6
	K03H9.3	F33A8.7
	K04A8.10	F33D11.8
	K04C2.7	F33D4.2
	K04C2.8	F33E11.1
	K04D7.6	F33E2.6
	K04F1.10	F33E2.7
	K04F1.3	F33H1.6
	K05D4.4	F33H12.5
	K05D4.6	F34D10.8
	K05F1.1	F34H10.1
	K05F1.3	F34H10.2
	K05F1.9	F34H10.3
	K05F6.9	F34H10.4
	K06A1.2	F35A5.1
	K06A4.2	F35B12.10
	K06A4.5	F35B12.7
	K06A5.2	F35B12.9
	K06B4.1	F35B3.1
	K06B9.2	F35C11.2
	K06B9.4	F35C11.3
	K06C4.17	F35C11.7
	K06C4.6	F35C12.3
	K06C4.9	F35C5.1
	K06H7.8	F35C5.2
	K07A1.4	F35C5.4
	K07A3.3	F35D11.11
	K07C6.11	F35E12.4
	K07C6.5	F35E12.6
	K07E12.2	F35E2.2
	K07E8.1	F35E2.8
	K07E8.5	F35E8.1
	K07F5.11	F35E8.13
	K07F5.4	F35E8.6
	K07G5.3	F35E8.8
	K07G5.4	F35F10.13
	K07H8.5	F35F10.5
	K08B4.5	F35F10.8
	K08C7.4	F35G12.7
	K08C9.4	F35G2.3
	K08D10.10	F35G8.2
	K08D10.9	F35H10.10
	K08E4.5	F35H8.4
	K08F4.11	F36A2.14
	K08F4.4	F36A4.11
	K08F8.5	F36A4.4
	K08H10.6	F36D1.3
	K09A11.2	F36D3.14
	K09A11.3	F36D3.2
	K09B11.4	F36F12.5
	K09B3.1	F36F12.7
	K09C8.5	F36F2.8
	K09C8.8	F36G3.3
	K09E10.2	F36G9.3
	K09E2.2	F36H12.10
	K09E4.1	F36H12.11
	K09E4.4	F36H12.3
	K09F5.2	F36H12.4
	K09F6.3	F36H12.7
	K09F6.5	F36H12.8
	K09G1.4	F36H12.9
	K09H11.6	F36H2.3
	K10B3.8	F36H9.7
	K10B3.9	F36H9.8
	K10C2.5	F37B1.1
	K10C9.8	F37B1.4
	K10D11.3	F37B4.1
	K10D11.6	F37B4.4
	K10D3.1	F37B4.5
	K10F12.3	F37C12.14
	K10G6.2	F37C12.18
	K11C4.1	F37C4.1
	K11D12.1	F37D6.6
	K11E4.1	F37F2.3
	K11E4.3	F38A1.1
	K11G9.3	F38A1.14
	K11H12.11	F38A5.10
	K12B6.8	F38A5.14
	K12D9.1	F38A5.3
	K12G11.1	F38A6.1
	M01A12.3	F38B6.5
	M01A12.4	F38C2.8
	M01B2.1	F38E1.8
	M01B2.6	F38E11.1
	M01B2.8	F38H12.2
	M01E10.2	F38H4.5
	M01G12.7	F39B2.2
	M01H9.2	F39B2.8
	M02B7.6	F39C12.2
	M02F4.1	F39E9.14
	M02G9.2	F39E9.2
	M02G9.3	F39H12.4
	M02H5.4	F40B1.1
	M03D4.4	F40C5.2
	M03F4.6	F40D4.1
	M03F8.1	F40D4.13
	M03F8.5	F40D4.2
	M04C9.5	F40E10.2
	M04D8.6	F40E3.3
	M05B5.1	F40E3.5
	M110.2	F40F4.5
	M110.9	F40F8.4
	M142.2	F40F8.7
	M151.1	F40F9.8
	M151.2	F40G12.7
	M153.5	F40H3.4
	M162.11	F40H3.5
	M163.5	F40H3.6
	M163.8	F40H7.12
	M176.1	F41B4.1
	M195.1	F41B5.2
	M195.3	F41B5.3
	M28.9	F41B5.6
	M7.10	F41D3.3
	M70.1	F41G3.17
	M70.3	F41G3.18
	R01E6.4	F41G3.21
	R01H2.2	F41G3.5
	R02D1.1	F41G4.3
	R02D3.1	F41H10.12
	R02E12.8	F41H10.9
	R02E4.1	F41H8.1
	R03C1.1	F41H8.4
	R03D7.1	F42A10.6
	R03G5.3	F42A10.8
	R03G5.5	F42A10.9
	R03H4.6	F42A6.6
	R04B3.3	F42A8.1
	R04B5.3	F42A9.3
	R04B5.7	F42C5.10
	R04B5.8	F42E11.4
	R04D3.1	F42E8.2
	R04E5.2	F42F12.10
	R05A10.3	F42F12.4
	R05C11.1	F42G10.1
	R05D8.10	F42G4.5
	R05D8.7	F42G4.6
	R05F9.5	F42G4.7
	R05G6.9	F42G8.9
	R06A10.3	F42G9.5
	R06A4.10	F42G9.9
	R06F6.7	F42H10.5
	R07A4.4	F42H11.1
	R07B1.4	F43A11.1
	R07B1.5	F43B10.2
	R07B1.8	F43C11.1
	R07B1.9	F43C11.10
	R07B5.4	F43C11.12
	R07B7.12	F43C11.3
	R07B7.14	F43C9.1
	R07C3.1	F43C9.2
	R07C3.12	F43C9.4
	R07C3.3	F43E2.3
	R07D5.1	F43E2.6
	R07E3.3	F44B9.4
	R07E5.15	F44C4.5
	R07E5.17	F44C8.4
	R07E5.6	F44C8.5
	R07G3.2	F44C8.6
	R08A2.1	F44C8.9
	R08A2.2	F44E5.4
	R08A2.5	F44E5.5
	R08C7.5	F44F1.6
	R08F11.7	F44F4.1
	R09B5.11	F44F4.10
	R09B5.7	F44G3.1
	R09D1.3	F44G3.14
	R09D1.4	F44G3.5
	R09D1.5	F45B8.4
	R09E10.1	F45C12.3
	R09E10.2	F45C12.4
	R09E10.3	F45D11.14
	R09E10.6	F45D11.15
	R102.3	F45D11.16
	R102.8	F45E1.3
	R105.1	F45E1.4
	R106.1	F45E10.1
	R10D12.11	F45E4.1
	R10D12.6	F45E4.5
	R10E4.7	F45H10.5
	R10E9.3	F45H7.2
	R10F2.5	F45H7.4
	R10H1.2	F45H7.6
	R11A5.7	F46A8.4
	R11A8.6	F46B3.15
	R11A8.8	F46B3.2
	R11D1.3	F46C3.3
	R11G10.1	F46C5.1
	R11G10.2	F46C5.10
	R12A1.3	F46C5.6
	R12C12.8	F46C8.5
	R12E2.10	F46C8.7
	R12E2.6	F46F5.1
	R12G8.1	F46F5.13
	R12H7.4	F46F5.5
	R134.1	F46F5.9
	R134.2	F46F6.4
	R13A1.4	F46G10.5
	R13A1.5	F46G11.4
	R13A5.4	F47A4.1
	R13D11.3	F47B3.5
	R13D11.6	F47B8.1
	R13D7.2	F47B8.2
	R13D7.7	F47C10.2
	R13F6.8	F47C12.11
	R13H4.7	F47C12.7
	R13H4.8	F47D2.6
	R151.1	F47D2.7
	R155.4	F47D2.8
	R155.5	F47D2.9
	R186.5	F47F2.2
	R52.6	F47F2.3
	SSSD1.1	F47G4.1
	T01B11.1	F47H4.2
	T01B4.1	F48A9.2
	T01B6.4	F48B9.1
	T01C2.1	F48B9.4
	T01C3.5	F48C1.4
	T01C4.1	F48C1.8
	T01D1.6	F48C5.1
	T01D3.2	F48C5.2
	T01G5.5	F48E3.1
	T01H10.1	F48F5.6
	T01H10.2	F48F7.7
	T02B11.7	F48G7.11
	T02B5.1	F48G7.2
	T02C12.4	F48G7.5
	T02E1.7	F48G7.7
	T02E9.6	F49B2.4
	T02G5.11	F49C12.12
	T02G5.13	F49C12.13
	T02G5.6	F49C12.14
	T02G6.2	F49C12.6
	T02G6.7	F49C5.11
	T03D3.1	F49C5.2
	T03F1.5	F49C5.7
	T03G6.1	F49D11.2
	T04A8.3	F49E10.3
	T04B2.7	F49E10.5
	T04D3.3	F49E11.2
	T04G9.2	F49E12.12
	T04H1.1	F49E12.4
	T04H1.3	F49E12.5
	T04H1.8	F49E12.8
	T05A1.1	F49E2.1
	T05A1.3	F49E2.4
	T05A10.4	F49F1.12
	T05A10.6	F49F1.5
	T05A12.2	F49H6.3
	T05A7.11	F49H6.5
	T05A7.6	F52B10.3
	T05A7.7	F52C6.12
	T05A8.5	F52C6.6
	T05A8.7	F52D1.2
	T05B4.1	F52D2.1
	T05B4.11	F52D2.10
	T05B4.4	F52D2.9
	T05C12.1	F52E1.3
	T05C12.3	F52E1.9
	T05C12.4	F52E10.3
	T05D4.5	F52E4.4
	T05E7.2	F52E4.5
	T05F1.5	F52E4.6
	T05F1.7	F52F10.3
	T05F1.9	F52F12.5
	T05H4.3	F52F12.8
	T05H4.4	F52H2.3
	T06A1.1	F52H2.4
	T06A10.2	F52H3.1
	T06A4.1	F53A2.2
	T06A4.3	F53A2.9
	T06C12.8	F53A3.3
	T06D4.4	F53A9.2
	T06D8.1	F53A9.5
	T06E4.7	F53B6.7
	T06E4.8	F53B7.7
	T06E4.9	F53C3.4
	T06E6.15	F53C3.7
	T06G6.3	F53E10.4
	T06H11.1	F53F1.6
	T07A5.3	F53F1.9
	T07A9.1	F53F10.1
	T07C12.8	F53F4.13
	T07C12.9	F53F4.17
	T07C5.3	F53G12.13
	T07D1.5	F53G2.4
	T07D10.1	F53H4.3
	T07D10.2	F53H8.3
	T07D10.3	F54A5.2
	T07E3.4	F54B8.1
	T07F10.4	F54B8.2
	T07G12.3	F54C1.1
	T07G12.5	F54C8.7
	T07H6.5	F54C9.1
	T08B1.1	F54D1.6
	T08B1.2	F54D10.6
	T08B6.2	F54D12.9
	T08B6.4	F54E4.4
	T08B6.6	F54F11.1
	T08D2.1	F54F12.1
	T08D2.2	F54F2.2
	T08D2.4	F54F3.4
	T08D2.6	F54F7.3
	T08D2.7	F54F7.7
	T08G11.5	F54F7.8
	T09B4.7	F54G2.1
	T09B9.3	F54G2.2
	T09D3.4	F54G8.3
	T09E11.7	F54H12.2
	T09F3.3	F54H12.4
	T09H2.1	F54H5.4
	T10B5.10	F55A11.8
	T10B5.8	F55A12.2
	T10B9.10	F55A3.6
	T10B9.4	F55A4.2
	T10E10.3	F55C5.1
	T10E10.4	F55C5.3
	T10E9.4	F55C9.3
	T10G3.2	F55D1.1
	T10H4.2	F55D1.2
	T10H4.4	F55D10.5
	T10H4.8	F55E10.1
	T12A2.5	F55E10.6
	T12A7.2	F55F1.3
	T12B3.2	F55F8.8
	T13C5.4	F55G1.15
	T13C5.7	F55G11.6
	T13F2.4	F55G11.7
	T13F3.1	F55G7.3
	T13G4.6	F55H2.1
	T13H5.2	F56A11.7
	T14B1.2	F56A3.5
	T14B4.5	F56A4.7
	T14B4.6	F56B3.2
	T14B4.9	F56B3.3
	T14C1.1	F56B3.9
	T14D7.3	F56B6.5
	T14E8.3	F56C11.2
	T14E8.4	F56C3.4
	T15B12.2	F56C4.3
	T15B7.14	F56C4.4
	T15B7.16	F56C9.8
	T15D6.7	F56D1.6
	T16A1.1	F56D2.5
	T16G1.1	F56D5.1
	T16G1.2	F56D5.9
	T16G12.3	F56D6.12
	T16G12.7	F56D6.15
	T16H12.6	F56D6.5
	T17H7.1	F56D6.7
	T19A5.3	F56E10.2
	T19B10.9	F56E10.4
	T19D12.7	F56E3.4
	T19D12.9	F56F11.3
	T19H12.10	F56G4.7
	T19H12.11	F56H1.1
	T19H12.3	F56H11.2
	T19H12.6	F56H11.3
	T19H5.1	F56H9.1
	T20B12.9	F57A8.4
	T20B6.2	F57A8.8
	T20D4.1	F57B10.8
	T20D4.13	F57C12.4
	T20D4.16	F57C9.6
	T20D4.5	F57F10.1
	T20D4.8	F57G12.1
	T20D4.9	F57G8.6
	T20F7.7	F57G9.4
	T20G5.6	F57H12.2
	T20H9.4	F57H12.7
	T20H9.6	F58A3.2
	T21B4.4	F58A3.4
	T21B6.3	F58A4.1
	T21E8.7	F58A6.4
	T21G5.1	F58D5.3
	T21G5.4	F58E1.13
	T21H3.2	F58E10.2
	T21H8.4	F58E10.6
	T22B11.3	F58E2.9
	T22B11.4	F58F12.4
	T22B2.6	F58F9.1
	T22B3.1	F58F9.9
	T22B3.2	F58G1.5
	T22B3.3	F58G1.8
	T22B7.3	F58G6.2
	T22C1.8	F58H1.5
	T22D1.12	F58H1.6
	T22E7.2	F58H12.1
	T22F3.7	F58H7.8
	T22F3.8	F59A1.13
	T22F7.3	F59A3.10
	T22F7.5	F59A7.5
	T22G5.4	F59A7.7
	T22H2.3	F59A7.9
	T22H6.7	F59B1.10
	T22H9.3	F59B1.3
	T22H9.4	F59B10.6
	T23B3.3	F59C6.14
	T23B7.2	F59D12.1
	T23D5.2	F59D6.1
	T23D5.6	F59D6.2
	T23F2.1	F59E11.1
	T23F6.2	F59E11.10
	T23F6.5	F59E11.12
	T23G11.10	F59E11.13
	T23G4.4	F59E11.5
	T23G5.5	F59E12.12
	T23H2.2	F59E12.8
	T23H2.4	F59F3.4
	T24A6.11	F59F5.3
	T24A6.19	F59H6.6
	T24A6.4	F59H6.7
	T24A6.8	H01A20.1
	T24C2.1	H01G02.3
	T24D5.5	H01G02.4
	T24E12.3	H01M10.2
	T24E12.9	H02I12.2
	T24F1.6	H02K04.1
	T25B2.3	H03G16.6
	T25B6.3	H04M03.2
	T25B6.5	H05C05.3
	T25B9.4	H05G16.1
	T25B9.6	H06A10.1
	T25C8.1	H06A10.2
	T25D10.5	H06H21.1
	T25E12.10	H06H21.10
	T25E12.13	H06I04.6
	T25E12.4	H08J19.1
	T26A8.2	H08M01.2
	T26C12.2	H09G03.1
	T26C12.4	H10D12.2
	T26C5.2	H10D18.1
	T26E4.3	H10D18.3
	T26H2.8	H10D18.4
	T27A10.2	H10D18.5
	T27A10.5	H10E21.3
	T27C5.12	H12D21.2
	T27E4.6	H12D21.3
	T27E7.3	H12D21.9
	T27E9.9	H12I13.2
	T27F6.1	H12I13.5
	T28A11.18	H12I13.6
	T28A11.20	H12I19.2
	T28A8.1	H13N06.2
	T28C12.2	H13N06.7
	T28C12.3	H14A12.5
	T28C6.5	H14N18.4
	T28D9.11	H16D19.1
	T28F2.3	H16O14.1
	T28F2.7	H17B01.5
	T28F3.5	H19M22.2
	T28F3.9	H20E11.2
	T28F4.2	H20J18.1
	T28H11.2	H22K11.2
	T28H11.7	H22K11.4
	T28H11.8	H23L24.2
	VY35H6BL.1	H23L24.5
	W01A8.7	H23N18.6
	W01B6.2	H24G06.1
	W01B6.5	H24O09.2
	W01C8.6	H25K10.7
	W01C9.4	H25P06.1
	W01D2.3	H25P06.4
	W01H2.3	H31B20.1
	W02B12.12	H32C10.2
	W02B8.3	H32K21.1
	W02D7.10	H36L18.1
	W02F12.7	H41C03.1
	W02G9.2	K01A2.1
	W02H5.7	K01A2.10
	W03B1.8	K01A2.2
	W03D2.1	K01A2.3
	W03D8.7	K01A2.4
	W03D8.9	K01A2.9
	W03F11.2	K01B6.1
	W03F11.4	K01B6.2
	W03G1.1	K01B6.3
	W03H1.2	K01D12.11
	W04C9.3	K01D12.15
	W04E12.1	K01F9.2
	W04G3.10	K02A2.1
	W04G3.3	K02B12.6
	W04G3.7	K02B12.9
	W04G5.2	K02B9.3
	W04G5.4	K02C4.4
	W04G5.5	K02C4.5
	W04G5.6	K02D10.2
	W04G5.8	K02D3.1
	W04G5.9	K02E10.8
	W05B2.2	K02E11.7
	W05B2.4	K02E11.8
	W05E10.2	K02E7.6
	W05H12.1	K02E7.7
	W06B3.1	K02F2.5
	W06D11.4	K02F3.8
	W06D12.5	K02F6.3
	W06D4.2	K02F6.6
	W06G6.9	K02G10.4
	W07A12.6	K02H11.4
	W07A12.7	K02H11.6
	W07A12.8	K03A11.2
	W07E11.2	K03A11.5
	W07E6.3	K03B8.4
	W07G1.1	K03B8.7
	W07G1.2	K03B8.9
	W07G1.7	K03C7.2
	W07G4.6	K03D3.10
	W08D2.8	K03D7.2
	W08E12.6	K03D7.4
	W08F4.2	K03D7.7
	W08F4.7	K03E6.5
	W08F4.9	K03H1.5
	W08G11.1	K03H1.6
	W09C3.8	K03H6.2
	W09D6.4	K03H6.4
	W09G12.10	K03H6.5
	W10C4.1	K03H6.7
	W10C8.1	K04A8.2
	W10C8.4	K04A8.4
	W10C8.5	K04B12.1
	W10G11.16	K04C2.5
	Y102A5B.2	K04C2.6
	Y102A5B.3	K04F1.11
	Y104H12BR.1	K04F1.6
	Y105C5B.18	K04F10.1
	Y105C5B.2	K04G11.1
	Y105C5B.25	K04G11.2
	Y105C5B.4	K04G2.9
	Y105C5B.8	K04H4.5
	Y105E8A.32	K04H4.7
	Y105E8A.5	K04H8.2
	Y105E8B.9	K05C4.4
	Y106G6H.13	K05F1.10
	Y10G11A.3	K05F1.5
	Y110A2AL.2	K05F1.8
	Y113G7A.14	K05F6.3
	Y113G7A.16	K05G3.1
	Y113G7A.5	K05G3.3
	Y113G7B.15	K06A1.3
	Y116A8A.6	K06A4.6
	Y116A8A.8	K06A4.7
	Y116A8B.1	K06A5.8
	Y116A8C.14	K06B4.3
	Y116A8C.23	K06B9.1
	Y116A8C.4	K06B9.6
	Y116F11A.3	K06C4.8
	Y116F11B.1	K06H6.3
	Y119C1B.5	K07A12.5
	Y119D3A.3	K07A3.2
	Y119D3A.4	K07B1.6
	Y11D7A.14	K07C10.1
	Y11D7A.9	K07C11.8
	Y13C8A.1	K07C5.5
	Y17D7A.4	K07C6.6
	Y17D7C.2	K07D4.2
	Y17G7B.22	K07D4.4
	Y17G9A.1	K07D4.8
	Y17G9A.5	K07D8.1
	Y18D10A.18	K07E3.7
	Y18D10A.22	K07E3.8
	Y18D10A.8	K07E8.3
	Y18H1A.1	K07E8.6
	Y18H1A.10	K07F5.3
	Y18H1A.9	K07F5.5
	Y19D10B.3	K07F5.7
	Y1A5A.1	K07H8.12
	Y22D7AL.11	K08A2.5
	Y22D7AR.12	K08B4.3
	Y22D7AR.14	K08B4.6
	Y22F5A.5	K08B4.7
	Y24D9B.1	K08B5.2
	Y25C1A.1	K08C7.2
	Y26D4A.4	K08C9.7
	Y27F2A.5	K08D10.11
	Y32B12A.3	K08D12.4
	Y32F6A.2	K08E5.3
	Y32F6A.5	K08E7.6
	Y32F6B.2	K08F8.2
	Y32G9A.4	K08F8.7
	Y34F4.3	K08G2.8
	Y35H6.3	K08H10.3
	Y37A1B.10	K08H2.2
	Y37A1B.12	K08H2.7
	Y37A1B.15	K08H2.8
	Y37D8A.12	K09A11.4
	Y37D8A.5	K09A9.6
	Y37E11AL.1	K09C4.7
	Y37F4.8	K09C4.9
	Y37H2C.1	K09C6.6
	Y37H9A.2	K09C8.7
	Y38A10A.2	K09D9.1
	Y38C1AA.9	K09D9.10
	Y38C1AB.8	K09D9.12
	Y38C1BA.3	K09D9.8
	Y38E10A.17	K09E2.4
	Y38E10A.5	K09E3.2
	Y38E10A.7	K09E4.5
	Y38F1A.6	K09E4.6
	Y38F1A.7	K09F5.5
	Y38F2AL.5	K09F6.10
	Y38H6A.3	K09F6.11
	Y38H6C.3	K09F6.7
	Y38H8A.3	K09F6.9
	Y39A1B.2	K09G1.2
	Y39A3A.2	K09G1.3
	Y39B6A.29	K09H11.10
	Y39B6A.30	K09H9.7
	Y39B6A.31	K10B4.1
	Y39B6A.41	K10B4.3
	Y39B6A.8	K10C3.6
	Y39C12A.6	K10C9.4
	Y39E4B.4	K10D11.7
	Y39F10C.1	K10D2.6
	Y39G8B.5	K10D2.7
	Y39G8C.4	K10D3.4
	Y40B10A.5	K10D3.6
	Y40B10B.1	K10D6.2
	Y40C5A.2	K10G4.3
	Y40H7A.4	K10G4.4
	Y40H7A.8	K10G6.4
	Y41C4A.1	K10G6.5
	Y41C4A.7	K10H10.5
	Y41D4A.1	K11C4.5
	Y41D4B.17	K11D12.10
	Y41E3.14	K11D12.3
	Y41E3.19	K11D12.9
	Y41E3.3	K12B6.3
	Y41G9A.2	K12B6.4
	Y42A5A.1	K12B6.6
	Y42A5A.2	K12D9.3
	Y43C5B.3	K12D9.5
	Y43D4A.5	K12D9.7
	Y43E12A.1	K12G11.5
	Y43E12A.3	K12G11.6
	Y43F8B.19	K12H4.1
	Y43F8C.4	K12H4.6
	Y44A6B.2	K12H6.8
	Y44A6D.4	K12H6.9
	Y44A6D.5	M01A10.2
	Y45F10A.2	M01A8.1
	Y45F10D.14	M01B2.11
	Y46C8AL.1	M01B2.3
	Y46C8AL.5	M01D7.5
	Y46D2A.3	M01D7.9
	Y46G5A.22	M01E10.3
	Y46H3A.1	M01F1.1
	Y46H3A.5	M01G12.13
	Y46H3D.4	M01G12.2
	Y46H3D.7	M01G12.5
	Y47D3A.10	M01H9.1
	Y47D3A.11	M01H9.5
	Y47D3B.1	M02A10.2
	Y47D3B.6	M02D8.2
	Y47D7A.12	M02E1.2
	Y47D7A.13	M02E1.3
	Y47D7A.15	M02F4.2
	Y47D7A.16	M02H5.1
	Y47G7B.1	M02H5.11
	Y47H9C.1	M02H5.2
	Y47H9C.10	M03A8.4
	Y47H9C.6	M03C11.1
	Y48B6A.7	M03D4.6
	Y48B6A.8	M04C3.1
	Y48D7A.2	M04C3.3
	Y48G1C.5	M04C7.3
	Y48G9A.6	M04D8.3
	Y49C4A.9	M04D8.4
	Y49E10.10	M04F3.2
	Y49E10.9	M04G12.1
	Y49F6B.8	M04G12.3
	Y49F6C.5	M04G12.4
	Y4C6A.1	M04G7.3
	Y4C6B.3	M05B5.2
	Y4C6B.4	M05D6.3
	Y50C1A.2	M05D6.7
	Y50D4B.1	M117.3
	Y50D4C.2	M163.2
	Y50E8A.10	M163.7
	Y50E8A.6	M176.7
	Y50E8A.9	M195.4
	Y51A2D.4	M199.6
	Y51B9A.7	M199.8
	Y51H7BR.4	M199.9
	Y52B11A.1	M28.1
	Y53C10A.2	M28.7
	Y53C10A.9	M28.8
	Y53C12A.8	M6.1
	Y53C12C.1	M79.4
	Y53F4B.25	PDB1.1
	Y53F4B.27	R01B10.3
	Y53F4B.28	R01B10.4
	Y53G8AM.7	R01E6.2
	Y54E2A.1	R01E6.6
	Y54E2A.5	R01H2.1
	Y54F10BM.4	R01H2.7
	Y54G2A.13	R02C2.3
	Y54G2A.20	R02C2.4
	Y54G2A.21	R02D5.3
	Y54G2A.36	R02E12.5
	Y54G2A.46	R03C1.3
	Y54G9A.10	R03E9.4
	Y55B1BR.1	R03G5.6
	Y55F3AM.2	R03H10.2
	Y55F3C.2	R03H10.4
	Y55H10A.2	R03H10.5
	Y56A3A.14	R03H10.6
	Y57A10A.35	R03H4.3
	Y57A10B.5	R03H4.4
	Y57A10C.3	R03H4.5
	Y57E12AL.4	R03H4.9
	Y57G11C.42	R04A9.3
	Y57G11C.47	R04A9.7
	Y57G11C.50	R04B5.9
	Y57G11C.6	R05A10.1
	Y57G7A.3	R05A10.4
	Y59A8B.3	R05A10.5
	Y61B8B.1	R05A10.7
	Y62E10A.14	R05A10.8
	Y62H9A.1	R05C11.2
	Y62H9A.10	R05C11.4
	Y63D3A.10	R05D3.5
	Y65B4BL.1	R05D7.1
	Y65B4BR.2	R05D7.2
	Y66D12A.13	R05D7.5
	Y67A10A.1	R05F9.13
	Y67A10A.11	R05F9.8
	Y67D8B.2	R05G6.6
	Y69A2AL.1	R05G9.1
	Y69A2AR.14	R05G9.2
	Y69A2AR.15	R05G9R.1
	Y69A2AR.9	R05H5.6
	Y69E1A.1	R05H5.7
	Y69E1A.6	R06B10.4
	Y69F12A.1	R06B10.7
	Y69H2.11	R06C7.3
	Y6B3B.1	R07A4.2
	Y6B3B.10	R07B1.1
	Y6G8.1	R07B1.6
	Y6G8.2	R07B5.3
	Y70C5C.1	R07B7.11
	Y70D2A.1	R07B7.13
	Y70D2A.2	R07B7.16
	Y71A12B.13	R07B7.4
	Y71D11A.5	R07B7.9
	Y71F9AL.2	R07C12.2
	Y71G12B.18	R07C3.14
	Y71G12B.25	R07C3.5
	Y71G12B.26	R07E3.2
	Y71G12B.32	R07G3.8
	Y71G12B.33	R08B4.2
	Y71G12B.4	R08C7.1
	Y71G12B.7	R08C7.11
	Y71H2AM.22	R08E5.4
	Y73B3A.11	R08F11.3
	Y73B3A.12	R08F11.4
	Y73B3A.13	R08H2.3
	Y73B3A.18	R09A1.3
	Y73B3A.3	R09B5.12
	Y73B3A.9	R09B5.6
	Y73B3B.1	R09D1.1
	Y73B6A.1	R09D1.12
	Y73B6A.3	R09D1.6
	Y73B6A.6	R09E10.10
	Y73B6BL.10	R09E10.4
	Y73B6BL.12	R09E12.1
	Y73B6BL.19	R09E12.4
	Y73B6BL.22	R09F10.4
	Y73B6BL.23	R09F10.7
	Y73B6BL.37	R09F10.9
	Y73B6BL.38	R09G11.1
	Y73B6BL.42	R09H10.6
	Y73E7A.3	R09H10.7
	Y73E7A.8	R102.2
	Y73F8A.2	R102.9
	Y73F8A.20	R107.1
	Y73F8A.31	R10A10.1
	Y73F8A.35	R10D12.17
	Y75B8A.12	R10E11.9
	Y75B8A.21	R10E12.2
	Y75D11A.3	R10E8.2
	Y76B12C.1	R10E8.3
	Y79H2A.4	R10E8.6
	Y7A9A.1	R10H1.4
	Y81G3A.5	R10H10.2
	Y82E9BL.3	R10H10.6
	Y82E9BL.4	R11A8.3
	Y82E9BR.12	R11D1.11
	Y8A9A.2	R11D1.6
	Y8A9A.6	R11E3.2
	Y94H6A.2	R11F4.1
	Y97E10B.7	R11G1.2
	Y9C2UA.1	R12B2.7
	Y9C9A.6	R12B2.8
	ZC116.1	R12E2.15
	ZC116.3	R12H7.1
	ZC13.3	R13.3
	ZC132.7	R13A1.10
	ZC15.1	R13A5.11
	ZC15.5	R13A5.3
	ZC155.2	R13A5.8
	ZC168.6	R13D11.1
	ZC190.5	R13D11.10
	ZC190.6	R13D11.8
	ZC190.7	R13D11.9
	ZC196.7	R13D7.11
	ZC21.3	R13D7.6
	ZC21.6	R13F6.2
	ZC239.5	R13F6.5
	ZC250.3	R13F6.6
	ZC250.5	R13H8.1
	ZC334.7	R13H9.2
	ZC404.13	R13H9.5
	ZC404.5	R13H9.6
	ZC412.2	R153.1
	ZC412.4	R160.2
	ZC412.5	R173.4
	ZC416.6	R90.1
	ZC416.8	R90.2
	ZC443.1	R90.3
	ZC449.1	R90.5
	ZC47.3	T01B10.4
	ZC482.2	T01C1.2
	ZC482.4	T01C3.4
	ZC504.2	T01C4.2
	ZC504.5	T01C4.8
	ZC506.4	T01D3.3
	ZC513.11	T01D3.7
	ZC513.3	T01G5.6
	ZC518.4	T01G6.7
	ZC53.6	T01H10.7
	ZC581.7	T02B11.1
	ZC84.2	T02B11.8
	ZC84.4	T02C1.2
	ZC84.6	T02C5.5
	ZK1010.5	T02D1.7
	ZK1010.7	T02E9.3
	ZK1010.9	T02G6.3
	ZK1025.7	T02H6.10
	ZK1037.1	T02H6.3
	ZK1037.5	T02H6.4
	ZK105.3	T03D8.4
	ZK105.5	T03D8.5
	ZK1053.2	T03D8.6
	ZK1053.3	T03E6.1
	ZK1053.5	T03E6.4
	ZK1055.2	T03E6.5
	ZK1055.4	T03E6.8
	ZK1067.5	T03F1.6
	ZK112.6	T03F7.1
	ZK1127.2	T03F7.6
	ZK1225.4	T03G11.1
	ZK1240.1	T03G11.10
	ZK1248.1	T03G11.2
	ZK1248.5	T03G11.3
	ZK1248.6	T03G11.5
	ZK1251.8	T03G11.8
	ZK1290.12	T03G11.9
	ZK1290.6	T03G6.2
	ZK1307.4	T04A11.1
	ZK180.5	T04A11.4
	ZK20.1	T04A11.8
	ZK228.5	T04A8.1
	ZK250.7	T04B2.8
	ZK262.3	T04C10.3
	ZK265.1	T04C12.3
	ZK265.4	T04C12.4
	ZK265.5	T04C12.7
	ZK265.8	T04C9.6
	ZK265.9	T04F8.9
	ZK328.6	T05A10.2
	ZK328.7	T05A10.5
	ZK328.8	T05A6.1
	ZK370.6	T05A7.5
	ZK377.1	T05A8.1
	ZK380.1	T05B4.2
	ZK39.2	T05B9.2
	ZK418.2	T05C1.2
	ZK430.3	T05C1.3
	ZK455.2	T05C12.5
	ZK455.3	T05E11.2
	ZK484.2	T05E11.8
	ZK512.6	T05E12.1
	ZK54.3	T05E12.2
	ZK546.3	T05E12.3
	ZK546.6	T05G11.2
	ZK550.5	T05G11.4
	ZK563.2	T05G11.7
	ZK596.2	T05H4.15
	ZK596.3	T06C10.6
	ZK6.4	T06C12.10
	ZK616.10	T06C12.13
	ZK616.9	T06C12.14
	ZK617.2	T06E4.4
	ZK622.2	T06E6.3
	ZK637.1	T06F4.1
	ZK643.8	T06G6.12
	ZK652.5	T06G6.2
	ZK662.2	T06G6.4
	ZK673.6	T06H11.5
	ZK673.7	T07A9.12
	ZK673.9	T07C12.10
	ZK678.5	T07C12.11
	ZK682.4	T07C4.9
	ZK688.1	T07C5.1
	ZK688.12	T07C5.2
	ZK697.11	T07D10.4
	ZK721.4	T07D10.6
	ZK770.1	T07D3.4
	ZK792.4	T07D4.1
	ZK795.2	T07D4.2
	ZK813.6	T07E3.6
	ZK822.3	T07F12.1
	ZK822.4	T07F12.4
	ZK829.1	T07G12.1
	ZK829.2	T07H3.3
	ZK829.8	T07H3.7
	ZK84.2	T07H8.1
	ZK849.4	T07H8.4
	ZK856.14	T07H8.5
	ZK856.4	T07H8.7
	ZK858.2	T08A9.10
	ZK863.9	T08A9.12
	ZK892.3	T08A9.13
	ZK892.4	T08A9.3
	ZK896.1	T08A9.6
	ZK896.8	T08A9.8
	ZK938.1	T08B1.3
	ZK938.3	T08B1.5
	ZK938.4	T08E11.1
	ZK945.6	T08E11.2
	ZK945.7	T08G3.10
	ZK945.8	T08G3.13
	ZK945.9	T08G5.1
	ZK970.5	T08G5.7
	ZK970.6	T08G5.8
		T08H4.2
		T09A5.14
		T09B9.2
		T09D3.3
		T09E11.1
		T09E11.3
		T09F5.11
		T09F5.3
		T10A3.1
		T10B10.5
[truncated: 922 more rows]

## Sheet: TableS16B
Genes up-regulated after P. luminescens infection: genes shared between datasets
Technique	RNA-seq only	Tiling arrays only	Oligo-arrays only	Tiling arrays + RNA-seq	Tiling arrays + Oligo-arrays	RNA-seq + Oligo-arrays	all three techniques
	1614	2360	404	1263	82	52	108
	4R79.1	2RSSE.2	B0001.6	AC3.3	B0207.3	B0240.3	B0024.4
	AC3.1	AC8.3	B0019.1	AH10.3	B0285.7	B0393.4	B0554.6
	AC7.1	AH6.3	B0207.5	B0024.1	B0545.1	C01A2.6	C01G12.1
	AH10.1	AH9.6	B0213.11	B0024.14	C01C10.1	C01B10.6	C02F5.5
	AH6.10	B0024.2	B0286.4	B0024.3	C04F6.4	C03C10.2	C08E3.3
	B0024.15	B0034.1	B0348.4	B0034.3	C06C6.5	C05D11.7	C09F12.1
	B0024.6	B0034.2	B0391.4	B0198.3	C09E7.3	C16A11.1	C12D12.1
	B0034.5	B0034.7	B0403.4	B0205.13	C09G9.5	C18B2.4	C12D5.4
	B0035.5	B0205.14	B0414.3	B0205.4	C16B8.3	C18H7.2	C17C3.1
	B0205.10	B0207.11	B0464.5	B0218.2	C18D11.2	C30E1.7	C18E9.7
	B0213.12	B0207.12	C01C4.1	B0218.8	C24H12.7	C33H5.16	C26F1.5
	B0218.5	B0207.8	C01G6.4	B0252.2	C25E10.12	C39B10.2	C29F3.7
	B0222.2	B0213.17	C01G8.3	B0280.12	C25E10.8	C39B5.12	C44H4.3
	B0222.4	B0213.5	C02B8.3	B0285.9	C29E6.1	C46C2.4	C47B2.6
	B0222.7	B0213.6	C02F5.3	B0294.1	C29F9.3	C46E10.8	C48B4.1
	B0238.12	B0218.1	C03E10.6	B0303.7	C30E1.6	C49C3.4	C49A9.5
	B0240.2	B0222.1	C03G6.11	B0304.3	C32H11.9	D1069.1	C49C3.9
	B0244.5	B0222.6	C03G6.17	B0331.2	C39B10.1	F07A11.4	C50F7.5
	B0250.1	B0222.8	C04C11.2	B0334.6	C45E1.4	F07C3.3	C54A12.2
	B0250.9	B0228.4	C04F12.1	B0344.2	C47A4.3	F09G8.4	C54G4.4
	B0252.5	B0238.7	C05C8.7	B0365.5	C49G7.10	F13D12.6	C55A6.6
	B0272.4	B0244.11	C05D9.5	B0393.5	C54C8.9	F14H3.10	EGAP7.1
	B0273.2	B0252.8	C06A8.9	B0395.2	C54D1.4	F19C7.1	F01D4.2
	B0280.11	B0272.1	C06B3.6	B0399.2	D2092.4	F19C7.7	F08G5.6
	B0280.2	B0285.6	C06G4.2	B0403.3	F08B12.1	F36H12.2	F10C2.3
	B0280.7	B0294.3	C08E3.5	B0403.5	F14D12.4	F47B3.7	F11A6.2
	B0286.2	B0303.14	C08E3.6	B0412.1	F14F11.2	F54D5.4	F12F6.9
	B0302.2	B0303.16	C12D8.1	B0412.2	F19G12.1	H06O01.1	F13H6.3
	B0303.8	B0310.1	C13D9.8	B0491.2	F22B7.1	K04H4.6	F14E5.5
	B0304.8	B0310.6	C14A6.6	B0495.4	F25C8.3	K05C4.1	F15D4.4
	B0348.5	B0348.2	C14E2.4	B0507.1	F28C1.2	K09D9.12	F17E9.11
	B0348.6	B0361.4	C15A11.7	BE10.2	F30B5.7	K09E10.1	F19B2.5
	B0361.11	B0379.2	C15F1.5	C01B12.1	F38B6.6	K09F6.4	F19G12.7
	B0365.6	B0391.9	C15F1.6	C01B12.3	F40F9.2	K09F6.5	F25B3.5
	B0365.7	B0399.1	C16B8.4	C01B7.4	F42F12.1	K11E4.1	F26A10.2
	B0416.2	B0403.2	C16C10.4	C01F1.3	F42G9.4	M01E10.3	F27E5.4
	B0432.1	B0416.1	C16D9.9	C01F1.5	F44A2.3	M01H9.2	F28B4.3
	B0454.8	B0432.14	C17F3.3	C01G12.11	F44D12.2	T05A7.6	F32E10.3
	B0496.2	B0454.2	C17F4.7	C01G6.7	F44G3.6	T06E6.15	F35C5.9
	B0507.6	B0454.6	C25A1.8	C01H6.8	F44G4.8	T09F5.1	F35E12.7
	B0507.7	B0457.6	C26B9.1	C02B4.1	F45D11.14	T10G3.2	F35E8.11
	B0507.8	B0478.1	C27F2.7	C02B8.5	F45E4.3	T10H4.8	F35E8.8
	B0511.2	B0491.3	C28H8.9	C02D5.1	F46F3.1	T12B3.1	F40F4.6
	B0511.5	B0491.4	C29E4.9	C02D5.2	F49H6.3	T12G3.1	F40F8.7
	B0523.5	B0491.8	C30F12.2	C02E7.6	F52D1.2	W03D8.6	F41A4.1
	B0554.5	B0495.1	C31A11.3	C02E7.7	F53A9.8	Y22F5A.4	F49E12.10
	B0554.7	B0495.10	C31E10.7	C02F4.4	F53G2.4	Y34B4A.9	F52H3.1
	BE10.1	B0496.3	C32B5.3	C02F5.11	F55A4.10	Y39B6A.20	F53A9.2
	C01B10.11	B0496.5	C32D5.9	C02F5.12	F56F12.1	Y43D4A.6	F54E2.1
	C01B12.5	B0496.7	C32H11.7	C02F5.14	F57B1.5	Y53G8AM.7	F57C12.4
	C01B12.8	B0496.8	C33A11.4	C02F5.8	F58G1.4	Y71F9AR.1	F57F4.4
	C01F6.6	B0507.10	C33D9.5	C03A3.1	F58H7.8	ZK970.6	F59B1.8
	C01G10.1	B0507.2	C34B2.3	C03A7.14	H03A11.2		K01D12.11
	C01G10.18	B0507.9	C34D10.1	C03A7.8	K10F12.3		K06A4.1
	C01G10.4	B0545.3	C35E7.5	C03G6.14	R07B1.1		K06A4.4
	C01G12.10	B0563.2	C36A4.9	C04E6.12	R160.4		K06G5.1
	C01G12.2	B0564.10	C36E8.1	C04G6.1	T01C4.2		K08D8.6
	C01G12.6	B0564.9	C37A2.8	C04G6.10	T01D3.7		K10C2.1
	C01G12.8	C01A2.1	C38C6.2	C04G6.13	T07C4.9		K11D12.3
	C01G5.3	C01A2.7	C38D4.8	C04H5.3	T07C5.1		M28.6
	C01G5.4	C01B10.1	C38D9.1	C05A9.1	T13C2.3		M60.2
	C01G8.1	C01B10.5	C39B5.6	C05D11.6	T16D1.2		R01H2.5
	C01H6.1	C01B4.7	C41D11.3	C05D12.1	T19F4.1		R03D7.6
	C01H6.5	C01B4.8	C43H6.7	C05D12.3	T20G5.8		R08E5.4
	C02D4.1	C01B7.5	C44H9.6	C05D9.2	T21E12.2		R09B5.11
	C02D4.2	C01C10.2	C45B2.1	C05E7.1	T23F11.3		R74.2
	C02E7.1	C01C4.3	C45G7.2	C06B3.3	T24H7.5		T01D3.6
	C02F12.1	C01F4.2	C45G7.3	C06B3.7	T28F2.5		T05E11.2
	C02G6.1	C01G10.15	C45G9.2	C06B3.8	W03D2.7		T06D8.1
	C02H6.1	C01G10.6	C47A10.8	C06E1.3	Y113G7B.11		T07G12.3
	C02H7.2	C01G12.7	C47C12.3	C06E1.8	Y15E3A.1		T09B4.7
	C03A3.3	C01G6.1	C49D10.11	C06G1.1	Y18H1A.11		T10H4.12
	C03A7.9	C01G6.2	C50A2.4	C06G1.2	Y43F8C.11		T11F9.11
	C03B1.2	C02A12.5	C50E10.7	C06G1.5	Y46H3A.3		T19D12.4
	C03C10.7	C02A12.6	C50F4.7	C06H2.5	Y48E1B.10		T20D3.2
	C03E10.3	C02B4.4	C50F7.2	C07A4.2	Y50E8A.2		T24B8.5
	C03G6.19	C02C6.2	C50H11.3	C07A9.4	Y57A10B.1		T24C4.4
	C03H5.7	C02D5.3	C50H11.5	C07A9.8	Y67D8C.9		T25C12.3
	C04B4.1	C02E7.13	C52E12.4	C07A9.9	Y71D11A.5		T28B4.4
	C04E12.2	C02F12.3	C52E4.3	C07D8.2	Y73F8A.32		T28C12.4
	C04E12.5	C02F12.7	C53A5.16	C07E3.3	ZC204.6		Y17G7B.8
	C04E12.7	C02F4.5	C53A5.17	C07E3.5	ZK265.7		Y18H1A.9
	C04F1.1	C02G6.3	C53D6.2	C07E3.9			Y1H11.2
	C04F5.2	C02H6.2	C54F6.5	C07F11.2			Y22F5A.5
	C04G2.2	C02H7.1	D1054.10	C07G3.2			Y34B4A.10
	C04G2.8	C03A7.4	D2062.6	C08E3.10			Y34B4A.6
	C04G2.9	C03A7.7	D2085.1	C08E3.15			Y37H2A.13
	C04G6.7	C03C10.9	E01F3.1	C08E3.4			Y37H2A.14
	C05B5.2	C03D6.1	E04F6.3	C08E8.4			Y39B6A.24
	C05B5.6	C03F11.1	E04F6.7	C08G9.2			Y46C8AL.2
	C05C12.1	C03F11.3	E04F6.9	C09B8.4			Y46C8AL.8
	C05C9.1	C03F11.4	F02A9.6	C09D1.2			Y46D2A.2
	C05C9.2	C03G5.13	F02D10.4	C09E8.2			Y47H10A.5
	C05C9.3	C03G5.7	F07E5.5	C09E8.3			Y48G8AR.1
	C05D10.2	C03G6.12	F07E5.6	C09F9.2			Y50E8A.16
	C05E11.7	C03G6.2	F08C6.2	C09G1.1			Y55B1AR.1
	C05E4.12	C04A11.4	F08F1.8	C09G5.3			Y55F3AM.14
	C06A1.1	C04A11.5	F08G12.4	C09H5.2			Y58A7A.5
	C06A5.2	C04C3.4	F11C1.2	C10C5.2			Y65B4BL.6
	C06B3.2	C04E6.13	F12A10.3	C10C5.3			Y65B4BR.6
	C06C3.3	C04F12.3	F13A7.3	C10C5.5			Y73B6BL.31
	C06E1.7	C04F12.6	F13G11.2	C10F3.3			Y95B8A.1
	C06E2.1	C04G2.7	F15B10.2	C10H11.3			ZC13.4
	C06E7.1	C04G6.5	F16H11.5	C10H11.6			ZC449.5
	C07D10.3	C04G6.6	F17C11.8	C11E4.8			ZK418.7
	C07E3.8	C05B5.3	F17E5.2	C11H1.9			ZK6.10
	C07G1.1	C05B5.9	F18C5.10	C12C8.1			ZK892.3
	C07G1.2	C05D11.4	F21D12.1	C12D8.19			ZK896.4
	C07G2.1	C05D12.4	F21F8.3	C13C12.2
	C07G2.3	C05D9.7	F21F8.7	C13G3.1
	C07G3.3	C05D9.9	F21G4.6	C14A4.13
	C07G3.5	C05E11.3	F21H12.6	C14C11.1
	C07H6.9	C05E4.4	F21H7.1	C14C11.8
	C08A9.9	C05E4.6	F22B7.3	C14F11.6
	C08F11.10	C05E7.2	F22F1.1	C14H10.3
	C08F11.14	C05E7.3	F23A7.6	C15A11.1
	C08F8.6	C05G5.1	F23H11.3	C15A11.3
	C08F8.7	C05G5.3	F25H9.1	C15C6.1
	C08H9.1	C05H8.1	F26B1.7	C15C6.2
	C08H9.12	C06A1.6	F26G5.5	C15C7.4
	C08H9.5	C06B3.5	F26G5.9	C15F1.2
	C09B7.1	C06B8.1	F27B10.1	C15H11.13
	C09B8.3	C06B8.11	F27C8.4	C15H11.2
	C09B9.3	C06C3.12	F27D4.6	C15H9.3
	C09B9.4	C06C6.2	F28D9.4	C16C8.2
	C09B9.7	C06C6.4	F30A10.4	C16D9.2
	C09D4.3	C06E1.4	F31D5.3	C16E9.4
	C09E7.10	C06E2.8	F32A7.1	C17C3.12
	C09E7.2	C06E2.9	F32E10.8	C17C3.15
	C09F12.3	C06E4.2	F32H2.4	C17C3.4
	C09G1.2	C06E7.4	F33D11.6	C17E7.6
	C09G12.1	C06E8.5	F35A5.2	C17H12.6
	C09G12.17	C06G3.1	F35C5.6	C17H12.8
	C09G5.1	C06G8.1	F36D3.8	C18A3.4
	C09G9.3	C06H5.2	F37B12.3	C18B2.2
	C09H5.5	C07A12.2	F37C12.1	C18B2.5
	C09H5.7	C07A9.11	F37C4.5	C18B2.6
	C10A4.5	C07A9.6	F38A1.10	C18D4.2
	C10A4.7	C07B5.3	F38C2.1	C18H7.11
	C10C6.2	C07D10.1	F38E9.2	C18H9.5
	C10G11.10	C07D10.4	F39G3.3	C18H9.6
	C10G11.8	C07E3.10	F40A3.3	C23H3.7
	C10H11.4	C07E3.4	F40A3.5	C23H4.6
	C11H1.5	C07H6.3	F40B1.1	C24B5.3
	C12C8.2	C07H6.7	F40F9.6	C24G6.7
	C12D12.3	C08B6.3	F40G9.11	C25B8.5
	C12D5.10	C08C3.1	F40H7.4	C25D7.4
	C12D5.11	C08E3.1	F41B5.9	C25F6.7
	C12D8.11	C08E3.13	F41E6.1	C25F9.5
	C12D8.18	C08E3.2	F42A10.1	C25G6.3
	C12D8.8	C08E3.9	F42A6.4	C26B2.3
	C13A2.12	C08F1.11	F42A6.6	C26B2.8
	C13D9.7	C08F1.5	F42E8.1	C26B9.3
	C13D9.9	C08F11.1	F42F12.9	C26C6.3
	C14A4.8	C08F11.17	F42G4.2	C26D10.5
	C14A6.3	C08G5.5	F42G8.4	C26F1.6
	C14B9.3	C08G5.6	F42G9.6	C26G2.1
	C14C10.1	C08G9.1	F43D2.4	C27A2.4
	C14C11.2	C08H9.4	F43D9.5	C27C7.3
	C15B12.7	C09B8.8	F44A2.1	C27D9.2
	C15B12.8	C09B9.1	F44B9.3	C27F2.2
	C15C8.2	C09B9.8	F44B9.8	C27H5.6
	C15H11.10	C09D1.1	F44E7.2	C28C12.4
	C15H9.2	C09D4.6	F44F1.7	C28H8.5
	C16A3.7	C09E10.2	F45D3.4	C29E4.1
	C16B8.2	C09E7.1	F45E6.2	C29E4.8
	C16C10.12	C09E7.6	F46A9.5	C29F3.2
	C16C10.13	C09F5.1	F46C5.2	C29F4.1
	C16C4.5	C09G1.5	F46C5.4	C29F9.4
	C16C8.18	C09G5.4	F46G10.1	C30A5.10
	C17A2.5	C10A4.3	F47B8.1	C30F12.1
	C17B7.10	C10C5.7	F47C10.2	C30F8.3
	C17B7.4	C10E2.5	F48C1.9	C30G12.3
	C17B7.5	C10F3.2	F48D6.4	C30H6.1
	C17B7.8	C10F3.4	F48E8.1	C30H6.2
	C17C3.18	C10F3.6	F49D11.10	C30H6.5
	C17C3.5	C10G11.3	F52E1.7	C31A11.5
	C17D12.6	C10G6.1	F52F12.7	C31H2.2
	C17E7.3	C10G8.5	F53A2.5	C32D5.14
	C17E7.8	C11D2.6	F53B2.6	C32E12.3
	C17G1.1	C11D9.1	F53F1.8	C32H11.1
	C17G10.3	C11E4.2	F54C8.6	C32H11.5
	C17G10.5	C11E4.6	F54C9.3	C33A12.6
	C17H1.14	C11G10.1	F54D5.11	C33C12.3
	C17H1.3	C11G10.2	F54D5.3	C33D9.3
	C17H1.4	C11H1.7	F54D7.2	C33F10.11
	C17H1.5	C12D12.4	F54F7.6	C33F10.7
	C17H1.6	C12D5.5	F55A11.4	C33G3.3
	C17H1.9	C12D5.8	F55B11.4	C34B2.11
	C17H11.1	C12D8.16	F56A8.6	C34B7.3
	C17H12.12	C13A10.2	F56B3.5	C34C12.6
	C17H12.3	C13A2.11	F56H9.2	C34C6.3
	C17H12.5	C13B9.4	F57A8.1	C34D4.2
	C18B10.6	C13C4.3	F58B3.6	C34E7.4
	C18B2.1	C13C4.5	F58E1.14	C34F6.1
	C18C4.1	C13C4.7	F58G11.6	C34G6.6
	C18C4.2	C13D9.1	F59A1.4	C34H4.1
	C18D11.10	C13E3.1	F59A1.6	C34H4.2
	C18D11.7	C13F10.1	F59B2.11	C34H4.3
	C18D4.3	C13G5.1	F59E11.7	C36A4.2
	C18E3.4	C14A11.5	F59E12.3	C36A4.3
	C18E3.7	C14A4.12	F59G1.1	C36B7.5
	C18E9.5	C14A4.15	H04M03.8	C37E2.2
	C18E9.8	C14A4.9	H06I04.1	C37H5.11
	C18F10.2	C14B9.1	H10E21.1	C38C6.3
	C18F10.5	C14C6.5	H17B01.1	C38C6.6
	C18H9.1	C14E2.6	H20J04.3	C38H2.2
	C18H9.8	C14F11.2	H22K11.1	C39E9.3
	C23G10.1	C14F11.3	H35N09.2	C39H7.1
	C23G10.4	C14F5.3	JC8.8	C40H1.4
	C23H4.4	C14H10.2	K02E7.4	C40H1.8
	C23H5.7	C15A11.6	K02F6.2	C41G7.5
	C24A3.1	C15A7.2	K04A8.10	C41G7.6
	C24B5.5	C15B12.3	K04A8.2	C42D4.13
	C24F3.3	C15B12.5	K04F10.4	C42D4.3
	C24F3.5	C15B12.6	K04G7.4	C42D8.5
	C24H11.4	C15C7.5	K05C4.6	C43F9.11
	C25A8.5	C15C7.7	K05D4.3	C43F9.5
	C25E10.4	C15C8.1	K06A4.7	C44B11.1
	C25F9.13	C15F1.8	K07G5.3	C44B11.3
	C25F9.2	C15H7.4	K07H8.9	C44B7.9
	C25G4.10	C15H9.11	K08B12.2	C44C10.1
	C25G4.8	C15H9.8	K08B12.5	C44E12.3
	C25G6.5	C16C2.2	K08D8.5	C44F1.1
	C26B9.2	C16C4.17	K08F11.4	C44H4.1
	C26B9.7	C16C4.6	K08H10.1	C44H4.2
	C26C6.4	C16C8.9	K08H2.1	C45B2.7
	C26C6.7	C16D6.2	K09C6.6	C45G7.5
	C27A12.8	C16D9.1	K10D3.2	C45G9.6
	C27A7.2	C16D9.4	K11G9.6	C46A5.3
	C27A7.6	C16E9.1	K12B6.1	C46E1.2
	C27A7.7	C16H3.1	K12G11.3	C46H11.11
	C27B7.6	C17B7.3	LLC1.2	C46H11.7
	C27D6.11	C17C3.13	M02H5.8	C46H11.8
	C27D8.1	C17C3.2	M03A1.6	C46H11.9
	C27D9.1	C17C3.6	M03A8.1	C47B2.8
	C27H2.2	C17C3.7	M03C11.5	C47E12.6
	C27H5.5	C17D12.2	M7.3	C48D5.1
	C28D4.5	C17F3.1	PAR2.4	C48D5.3
	C29E6.4	C17F4.8	R01H10.1	C49A9.8
	C29F3.1	C17G1.6	R02D5.1	C49C8.5
	C29F4.3	C17G10.6	R04D3.2	C49F8.3
	C29F7.6	C17H1.7	R04D3.8	C49G7.12
	C30B5.3	C17H12.10	R05D3.2	C49G7.3
	C30B5.6	C17H12.9	R05D8.6	C49G7.4
	C30B5.7	C18A11.1	R07B1.10	C49G7.5
	C30C11.2	C18A11.3	R07C3.6	C50B6.4
	C30C11.4	C18A11.7	R08H2.12	C50B6.7
	C30E1.8	C18A3.6	R08H2.2	C50C3.5
	C30F12.6	C18A3.9	R09A1.1	C50D2.1
	C30G12.1	C18B10.4	R09B3.1	C50F2.6
	C30G4.2	C18B10.5	R09B5.6	C52A10.1
	C31A11.1	C18B12.3	R09H3.3	C52B9.6
	C31A11.7	C18B2.3	R107.7	C52E4.7
	C32B5.4	C18C4.10	R11G1.3	C53B4.7
	C32B5.8	C18D1.3	R12C12.3	C53B4.8
	C32E12.2	C18D11.6	R12E2.2	C53C7.3
	C32E8.6	C18D4.5	R12E2.6	C53D6.11
	C32E8.8	C18F10.9	R53.1	C54A12.1
	C32F10.1	C18G1.1	R53.7	C54C8.4
	C33A12.13	C18G1.6	R74.5	C54D1.2
	C33B4.2	C18H7.7	T01B4.1	C54D10.12
	C33D3.3	C18H9.7	T02E1.3	C54D10.14
	C33F10.1	C23F12.1	T03G11.2	C54D2.1
	C33H5.1	C23H3.2	T04A8.14	C54F6.10
	C33H5.2	C23H3.9	T04A8.3	C54F6.8
	C33H5.4	C24A11.5	T04A8.9	C54G7.3
	C34D4.9	C24A8.4	T05G5.8	C55A6.5
	C34E10.9	C24A8.5	T07A9.10	C55C3.1
	C34F11.1	C24D10.7	T07C12.3	C55C3.6
	C34G6.1	C24H10.3	T08B1.6	C56A3.3
	C35A11.4	C24H11.8	T08D10.3	C56C10.4
	C35A5.1	C25A1.2	T08G11.3	C56E10.3
	C35A5.2	C25B8.4	T08G5.10	C56G2.4
	C35A5.3	C25B8.6	T09B9.3	D1005.3
	C35A5.5	C25D7.2	T09E11.8	D1007.3
	C35B1.8	C25D7.5	T10B10.7	D1014.5
	C35C5.11	C25E10.11	T10B9.1	D1046.5
	C35C5.2	C25E10.5	T10C6.9	D1054.5
	C35C5.5	C25F6.2	T10H10.2	D1054.9
	C35D10.2	C25F6.6	T10H4.6	D1069.2
	C36A4.5	C25F6.8	T12A2.2	D2023.3
	C36B7.7	C25F9.12	T12F5.5	D2024.4
	C36C9.4	C25F9.9	T14G11.1	D2063.1
	C36H8.1	C25G6.1	T19A5.1	D2092.8
	C37A2.3	C26B9.6	T19A5.5	DC2.2
	C37C3.10	C26D10.7	T19C3.1	DC2.5
	C38C10.4	C26E1.1	T19C3.4	E01G4.6
	C38D9.8	C26F1.1	T20H9.5	E01G6.1
	C39B10.5	C26F1.10	T21H3.1	E02C12.8
	C39B5.1	C27A2.8	T22C8.5	E03A3.6
	C39B5.3	C27A7.4	T22G5.1	E03G2.4
	C39B5.7	C27A7.5	T22H6.6	E03H12.5
	C39B5.8	C27B7.7	T23B3.5	E03H4.10
	C39D10.6	C27C7.2	T23G7.4	E03H4.7
	C39F7.4	C27C7.4	T24A6.13	E04D5.3
	C39H7.9	C27C7.8	T24B1.1	EGAP1.3
	C40A11.8	C27D6.12	T24B8.3	EGAP2.3
	C40C9.1	C27D6.4	T24C12.3	F01D5.1
	C40H5.4	C27H5.1	T24D5.4	F01D5.10
	C40H5.5	C27H5.8	T24D8.1	F01D5.3
	C41A3.1	C27H6.1	T24D8.5	F01D5.5
	C41G6.14	C27H6.4	T24H10.3	F01D5.6
	C41G6.2	C28C12.13	T25B6.7	F01G10.10
	C41G7.2	C28G1.5	T25D3.4	F01G10.3
	C42C1.2	C28H8.6	T26C11.4	F01G10.4
	C42C1.3	C29A12.4	T26C5.3	F01G10.6
	C42D4.2	C29E4.5	T26E4.10	F02C12.2
	C43C3.2	C29E4.7	T27A1.1	F02C12.5
	C43D7.5	C29E6.2	T27A1.6	F02E8.6
	C43D7.8	C29E6.3	T27B7.1	F02E9.3
	C43F9.6	C29F3.3	T27E9.9	F07C3.8
	C43G2.5	C29F3.5	T28H10.3	F07C6.2
	C43H6.6	C29F5.7	W01F3.1	F07E5.8
	C44B7.3	C29F9.12	W02D7.8	F07E5.9
	C44B7.8	C29G2.2	W03F8.9	F07F6.5
	C44B9.2	C29H12.3	W03G11.3	F07G6.7
	C44C10.3	C29H12.6	W03G9.1	F08A10.1
	C44H9.7	C30A5.4	W03H9.3	F08A8.1
	C45B11.5	C30A5.7	W04B5.3	F08A8.2
	C45B2.4	C30D11.1	W05F2.4	F08B1.1
	C45G9.10	C30G7.2	W06F12.1	F08B4.2
	C45G9.11	C30H6.10	W06H3.1	F08C6.1
	C45H4.2	C31A11.4	W06H8.1	F08C6.4
	C46A5.2	C31B8.12	W07B3.2	F08D12.3
	C46A5.4	C31B8.4	W07G4.4	F08F1.6
	C46C2.6	C31H2.4	W08A12.2	F08F3.4
	C46E1.3	C31H5.3	W09D12.1	F08G2.5
	C46F4.3	C31H5.5	Y102A5C.8	F08G5.4
	C46H3.3	C32B5.1	Y105E8A.4	F09A5.2
	C47A4.2	C32B5.11	Y106G6A.2	F09B12.1
	C47E12.5	C32B5.12	Y110A7A.17	F09C12.2
	C47F8.6	C32B5.6	Y17D7B.8	F09C6.2
	C48C5.1	C32D5.1	Y18D10A.12	F09E8.6
	C48E7.8	C32D5.2	Y19D10A.9	F09F9.2
	C49A1.3	C32D5.6	Y20F4.4	F09G2.6
	C49A9.1	C32E8.7	Y26D4A.21	F09G8.8
	C49C3.13	C32H11.10	Y26G10.2	F10A3.1
	C49C8.1	C32H11.11	Y37E3.15	F10A3.3
	C49F5.4	C32H11.12	Y38A10A.5	F10D11.6
	C49F5.8	C32H11.8	Y38F2AL.6	F10D2.10
	C49G7.8	C33A12.2	Y38F2AR.2	F10D2.11
	C49H3.1	C33B4.3	Y39A1A.15	F10D2.2
	C50B6.5	C33B4.4	Y39A1C.4	F10D2.5
	C50C3.2	C33B4.5	Y39B6A.30	F10D2.6
	C50D2.3	C33C12.9	Y39B6A.5	F10E7.10
	C50E10.10	C33D12.2	Y39E4B.12	F10F2.3
	C50E10.11	C33D12.6	Y39G10AR.16	F10G7.12
	C50F4.10	C33D3.1	Y39G10AR.8	F11A1.2
	C50F4.2	C33D9.1	Y40C7B.4	F11A5.3
	C50H2.12	C33D9.13	Y44E3A.1	F11C1.3
	C52B9.7	C33D9.9	Y45G12C.15	F11C7.7
	C52E4.4	C33E10.10	Y46H3B.1	F11D11.3
	C53A5.4	C33F10.13	Y47H9C.9	F11E6.8
	C53A5.9	C33F10.5	Y48E1C.4	F11E6.9
	C53B4.6	C33G3.1	Y48G9A.3	F11G11.1
	C53C7.1	C33G8.11	Y48G9A.6	F11G11.10
	C53D6.3	C33G8.4	Y49A3A.2	F11G11.12
	C54D10.13	C33H5.13	Y51F10.10	F11G11.9
	C54D10.4	C34B2.1	Y51F10.7	F13A7.11
	C54E10.3	C34B2.9	Y51H7C.6	F13A7.2
	C54F6.12	C34B4.1	Y53C10A.15	F13B12.4
	C54F6.4	C34B4.3	Y53G8AL.3	F13B6.1
	C54F6.9	C34C6.7	Y54E10A.11	F13B6.2
	C55B7.12	C34D1.1	Y54E2A.12	F13D11.2
	C55C3.7	C34D1.5	Y54E2A.7	F13D11.4
	C56E6.5	C34D4.15	Y54F10AL.1	F13D12.9
	C56E6.6	C34D4.3	Y54F10BM.13	F13D2.1
	CD4.5	C34D4.8	Y54G11A.12	F13G3.3
	D1005.1	C34E11.3	Y54G11A.5	F13H8.4
	D1005.6	C34E7.1	Y54G11A.6	F13H8.5
	D1007.1	C34E7.3	Y54G9A.4	F14B6.2
	D1007.13	C34F11.9	Y55F3C.2	F14B8.5
	D1022.9	C34F6.10	Y59C2A.2	F14B8.7
	D1025.3	C34G6.3	Y5H2B.2	F14D12.6
	D1037.5	C34H3.2	Y60A3A.4	F14F9.2
	D1044.3	C34H4.4	Y62F5A.1	F14F9.3
	D1044.8	C35A5.10	Y71F9B.8	F14F9.4
	D1046.4	C35A5.11	Y73B3A.5	F14H12.1
	D1054.7	C35A5.7	Y76A2B.6	F14H8.4
	D1065.5	C35A5.9	Y77E11A.11	F15A8.6
	D1069.4	C35B1.3	Y77E11A.4	F15B9.1
	D1081.5	C35B1.7	Y7A5A.6	F15B9.6
	D2013.2	C35D10.12	Y87G2A.13	F15B9.7
	D2013.3	C35E7.10	Y92H12BL.5	F15B9.8
	D2021.2	C35E7.11	Y97E10AR.2	F15E6.2
	D2024.3	C35E7.2	ZC373.6	F15G9.4
	D2030.9	C36A4.10	ZC404.9	F15H10.1
	D2092.6	C36B1.1	ZC455.9	F15H10.8
	D2096.6	C36B7.8	ZC487.5	F16B4.2
	DY3.5	C36C5.12	ZC8.4	F16B4.9
	E02A10.2	C36E8.2	ZK1320.3	F16D3.7
	E02C12.10	C36E8.4	ZK256.1	F16F9.2
	E02C12.6	C36F7.5	ZK287.4	F16H6.10
	E02H1.6	C36H8.2	ZK353.3	F17A9.3
	E02H4.2	C36H8.3	ZK484.3	F17C11.3
	E02H9.5	C37A5.1	ZK488.7	F17C8.7
	E03H12.3	C37C3.12	ZK524.1	F17E9.5
	E03H12.6	C37C3.3	ZK6.7	F18C5.5
	E04A4.2	C37C3.7	ZK632.5	F18E9.4
	EEED8.6	C37H5.1	ZK673.1	F18F11.4
	EGAP9.2	C37H5.13	ZK892.2	F19F10.8
	EGAP9.4	C38H2.3	ZK945.1	F19H8.4
	F01D4.8	C39D10.11	ZK945.2	F20C5.4
	F01D5.2	C39E6.2		F20D1.7
	F01D5.7	C39E9.4		F20G2.3
	F01F1.8	C39E9.7		F20G2.5
	F01G12.6	C39H7.4		F21F8.4
	F02A9.1	C40A11.3		F22A3.1
	F02C12.4	C40A11.7		F22B7.10
	F02D8.2	C40C9.4		F22E10.1
	F02E11.1	C40C9.5		F22E10.3
	F02E11.3	C40H1.3		F22F4.1
	F07A11.1	C41C4.5		F23B2.12
	F07A11.2	C41D11.6		F23C8.1
	F07B10.1	C41D7.2		F23H12.4
	F07B10.2	C41G6.12		F23H12.5
	F07B10.7	C42D8.8		F25A2.1
	F07C3.1	C43C3.1		F25D1.3
	F07E5.1	C43E11.5		F25D1.4
	F07F6.6	C43E11.6		F25D7.3
	F07F6.9	C43F9.10		F25E2.1
	F07G6.6	C43F9.8		F25E2.4
	F07H5.6	C43G2.2		F25E5.2
	F07H5.9	C43G2.4		F25G6.6
	F08C6.6	C43H6.8		F25G6.7
	F08D12.2	C44B11.6		F25H8.3
	F08G2.6	C44B12.4		F25H8.6
	F08G5.7	C44C10.10		F26B1.4
	F09C12.8	C44C10.5		F26E4.7
	F09C6.1	C44C8.7		F26F12.4
	F09C6.13	C44E4.6		F26F4.3
	F09E5.10	C44F1.5		F26G1.5
	F09E5.4	C44H4.4		F27C1.8
	F09E8.1	C44H4.8		F28A12.2
	F09F3.9	C44H9.8		F28B12.2
	F10A3.2	C45B11.3		F28D1.9
	F10B5.3	C45B11.6		F28D9.2
	F10C2.7	C45B2.2		F28H7.8
	F10D11.5	C45E5.4		F29B9.9
	F10D2.1	C45G7.4		F29C12.1
	F10D2.4	C45G9.13		F29D11.1
	F10E7.1	C45G9.7		F29G6.1
	F10F2.6	C45G9.9		F30A10.2
	F10F2.9	C45H4.3		F30B5.1
	F10G7.8	C46C11.3		F30H5.3
	F10G8.9	C46E10.2		F31A9.3
	F11A5.4	C46F11.6		F31D4.4
	F11C7.6	C46G7.3		F31D5.4
	F11D11.11	C46H11.10		F31D5.5
	F11D5.7	C47A10.3		F31F4.11
	F11E6.10	C47A10.7		F31F6.5
	F12E12.11	C47D2.1		F31F7.2
	F12F6.8	C47D2.2		F32A5.8
	F13A2.2	C47E12.14		F32B5.2
	F13A7.12	C47E8.3		F32B6.4
	F13A7.9	C47E8.7		F32D8.3
	F13B12.3	C47F8.1		F32H2.5
	F13C5.3	C47F8.4		F32H2.8
	F13E9.14	C48A7.1		F32H5.7
	F13E9.8	C48B4.3		F33A8.10
	F13E9.9	C48D1.3		F33A8.7
	F13G3.2	C48D5.2		F33D11.3
	F14B4.2	C48E7.6		F33D4.6
	F14D2.14	C49A1.10		F33E2.2
	F14D7.8	C49A9.7		F33H12.2
	F14E5.1	C49C8.2		F33H12.5
	F14F3.4	C49D10.7		F33H2.8
	F14F9.1	C49G7.11		F34D10.6
	F14F9.7	C49G7.6		F35A5.3
	F14H12.2	C50B6.12		F35B12.2
	F14H12.3	C50B6.14		F35B3.4
	F15A2.3	C50B8.4		F35C5.5
	F15A2.5	C50B8.5		F35D11.2
	F15A4.9	C50B8.6		F35D11.7
	F15B10.1	C50C10.4		F35E12.10
	F15D3.4	C50C3.12		F35E12.2
	F15E11.4	C50C3.9		F35E12.4
	F15G9.6	C50D2.2		F35E12.5
	F15H10.7	C50D2.4		F35E12.8
	F15H9.4	C50E3.14		F35E12.9
	F16B4.3	C50E3.6		F35F10.7
	F16H6.1	C50F2.5		F35H10.10
	F16H6.2	C50F4.9		F35H10.3
	F17A2.3	C50H11.4		F35H8.1
	F17B5.10	C50H11.8		F36D3.4
	F17B5.6	C50H2.2		F36D3.9
	F17C11.11	C51E3.10		F36D4.5
	F18A1.1	C51E3.7		F36G3.1
	F18A1.7	C51E3.8		F36H5.3
	F18A11.1	C52A11.4		F36H9.5
	F18A12.1	C52B9.1		F37A4.4
	F18C5.1	C52B9.10		F37B1.3
	F18E2.6	C52B9.9		F37B1.5
	F18E3.6	C52E12.2		F38A3.2
	F18F11.3	C52E2.1		F38A5.3
	F19B10.13	C52G5.2		F38B2.2
	F19B6.4	C53A3.3		F38B6.1
	F19C6.3	C53A5.13		F38B6.2
	F19C7.4	C53A5.5		F38B6.5
	F19C7.6	C53B7.1		F39B3.2
	F19H8.5	C53B7.6		F39C12.3
	F20A1.4	C53C11.3		F39D8.3
	F20A1.7	C53C9.2		F39E9.1
	F20A1.8	C53D5.2		F39G3.4
	F20B6.3	C53D5.3		F39G3.5
	F20D1.4	C54A12.3		F40E10.4
	F20D6.3	C54C6.1		F40E10.5
	F20D6.6	C54C6.2		F40H7.12
	F20G2.4	C54C6.7		F41B5.2
	F21C10.6	C54C8.12		F41C3.11
	F21C3.7	C54C8.7		F41C6.1
	F21F3.2	C54D1.6		F41C6.5
	F21F3.4	C54D1.7		F41D3.6
	F21F8.10	C54D10.10		F41D9.3
	F21H12.5	C54D10.3		F41E7.3
	F21H7.14	C54D10.5		F41F3.3
	F21H7.5	C54D10.8		F41F3.8
	F22B3.4	C54D2.2		F42A10.7
	F22B5.5	C54D2.5		F42C5.10
	F22B8.4	C54E10.6		F42C5.3
	F22E10.5	C54E4.3		F42D1.2
	F22E5.1	C54F6.15		F42H10.5
	F22E5.3	C54G10.1		F43C1.5
	F22E5.4	C54G4.5		F43C1.7
	F22G12.1	C54G6.3		F43D9.1
	F22G12.3	C55A1.11		F43H9.2
	F22G12.7	C55A1.3		F44A2.2
	F22H10.2	C55A1.4		F44B9.1
	F23B12.1	C55A1.7		F44B9.10
	F23B2.4	C55A1.9		F44D12.4
	F23F12.4	C55A6.11		F44D12.5
	F23F12.6	C55A6.12		F44E2.4
	F23H11.6	C55B7.10		F44E7.8
	F23H12.6	C55C2.5		F44F4.4
	F25B3.4	C55H1.2		F44G3.10
	F25D1.5	C56A3.7		F44G3.14
	F25D7.5	C56E10.4		F45E1.5
	F25F2.1	C56G2.9		F45E10.1
	F25F6.1	C56G3.1		F45E10.2
	F25H2.1	CC8.1		F45H7.4
	F25H5.7	D1005.2		F46A9.3
	F25H9.3	D1007.19		F46B3.1
	F26A1.8	D1009.3		F46B3.5
	F26A1.9	D1014.2		F46C3.3
	F26A3.5	D1022.6		F46C8.2
	F26A3.6	D1022.8		F46C8.6
	F26D10.10	D1044.2		F46C8.8
	F26D2.10	D1053.3		F46F11.3
	F26D2.3	D1054.12		F46G10.3
	F26F2.4	D1073.1		F46G10.4
	F26F4.2	D1079.1		F47B10.2
	F26G1.3	D1081.11		F47B8.10
	F26H9.8	D1081.2		F47C12.1
	F27B3.2	D2005.2		F47F6.1
	F27C1.3	D2062.5		F47F6.3
	F27C8.5	D2062.8		F47G9.3
	F28A12.1	D2089.4		F47H4.11
	F28G4.2	D2096.10		F48A11.1
	F28G4.4	DH11.4		F48C1.7
	F28H7.9	DH11.5		F48C11.1
	F29F11.2	E01A2.3		F48C5.1
	F29G6.3	E01A2.7		F48E3.7
	F29G9.5	E02A10.4		F48E3.8
	F29G9.6	E02C12.9		F48F7.7
	F31B12.3	E02H4.1		F48G7.5
	F31E8.5	E02H9.4		F49C12.2
	F31F4.7	E03D2.1		F49E10.2
	F31F6.1	E03G2.3		F49E10.4
	F32A7.5	E03H4.12		F49E11.2
	F32B4.8	E03H4.3		F49E12.12
	F32B5.1	E03H4.8		F49E12.9
	F32B6.10	E04F6.12		F49F1.1
	F32B6.5	E04F6.2		F49F1.6
	F32D8.1	E04F6.4		F49F1.7
	F32D8.2	E04F6.6		F49H6.13
	F32E10.7	EGAP1.1		F52A8.3
	F33C8.1	EGAP4.1		F52B11.3
	F33D11.4	EGAP798.1		F52C9.5
	F33D11.5	F01D4.4		F52D1.1
	F33D11.7	F01D4.6		F52D1.3
	F33E2.10	F01D5.8		F52E1.8
	F33H1.5	F01E11.1		F52F10.2
	F33H12.4	F01E11.3		F52F10.3
	F35A5.4	F01E11.5		F52G3.5
	F35A5.5	F01F1.13		F53A9.1
	F35B12.4	F01G10.5		F53B1.4
	F35B3.1	F01G10.8		F53B1.6
	F35C5.7	F01G10.9		F53B2.2
	F35C8.3	F02C9.4		F53B2.5
	F35D2.1	F02D10.1		F53B2.8
	F35D2.2	F02D8.1		F53B3.6
	F35E12.3	F02G3.1		F53C11.1
	F35E2.9	F07A5.5		F53C3.3
	F35F10.4	F07B7.1		F53F1.4
	F35G12.12	F07B7.13		F53F1.5
	F35G2.1	F07B7.14		F53F4.5
	F36A2.3	F07C3.2		F53H4.3
	F36A4.10	F07C4.3		F54B11.2
	F36A4.6	F07C4.4		F54B11.8
	F36D3.5	F07C4.5		F54B11.9
	F36D4.1	F07C4.8		F54B8.3
	F36D4.3	F07C6.6		F54D1.6
	F36D4.4	F07E5.4		F54D10.9
	F36F12.3	F07E5.7		F54D5.15
	F36G9.13	F07G11.7		F54F2.1
	F36H1.3	F07G11.8		F54F3.3
	F36H1.4	F07G6.5		F54H5.2
	F36H5.10	F07G6.8		F55A11.5
	F36H5.5	F07G6.9		F55A4.7
	F37B1.2	F08D12.11		F55C9.8
	F37B1.8	F08D12.7		F55F1.3
	F37B12.1	F08E10.1		F55F8.1
	F37B4.7	F08E10.2		F55F8.8
	F37C4.1	F08E10.3		F55G1.12
	F37E3.3	F08E10.7		F55G1.13
	F37H8.4	F08F3.10		F55G1.15
	F38A1.15	F08F3.8		F55G11.4
	F38A1.9	F08F8.1		F55G11.7
	F38A3.1	F08F8.5		F55G11.8
	F38B6.3	F08G12.1		F56B3.2
	F38B6.7	F08G12.8		F56C11.6
	F38E11.12	F08G2.8		F56D1.6
	F38E11.4	F08G5.3		F56D2.5
	F38H4.2	F08H9.3		F56D3.1
	F38H4.4	F09B12.6		F56D5.3
	F39D8.1	F09B9.4		F56D6.14
	F39D8.2	F09C12.1		F56D6.2
	F39D8.4	F09C12.7		F56E10.2
	F39G3.2	F09C3.1		F56H1.1
	F39G3.6	F09C3.2		F57B7.2
	F40B5.2	F09C6.12		F57B7.3
	F40D4.12	F09C6.9		F57B9.3
	F40F12.3	F09C8.1		F57B9.9
	F40F12.4	F09E5.13		F57C12.1
	F40F9.1	F09E5.7		F57E7.1
	F40F9.3	F09E8.7		F57F5.3
	F40G12.10	F09F3.6		F57G12.2
	F40G12.4	F09F7.5		F58A4.11
	F40G12.6	F09F7.8		F58A6.1
	F40G12.9	F09F9.4		F58A6.4
	F40H6.6	F09G2.5		F58A6.6
	F41B5.3	F09G8.6		F58A6.8
	F41B5.7	F10A3.11		F58B4.1
	F41B5.8	F10B5.4		F58E1.6
	F41D3.2	F10C1.7		F58E6.11
	F41D3.7	F10C1.8		F58F6.1
	F41D9.2	F10D2.12		F58F9.6
	F41D9.5	F10D2.7		F58G1.5
	F41E6.11	F10D7.3		F58G4.1
	F41E6.14	F10E7.9		F58G6.5
	F41E6.8	F10E9.1		F58H1.2
	F41E7.1	F10E9.12		F58H1.5
	F41G3.17	F10E9.2		F58H1.6
	F41G3.2	F10F2.4		F59A7.1
	F41G3.3	F10G2.7		F59B10.1
	F41G4.5	F10G7.6		F59C12.1
	F41G4.7	F10G8.5		F59F5.7
	F41H10.7	F11A5.6		H02F09.2
	F42A8.1	F11A5.7		H02F09.3
	F42A9.4	F11C1.4		H02K04.1
	F42A9.7	F11C1.6		H03E18.1
	F42E11.3	F11D11.4		H04M03.4
	F42G2.4	F11D5.1		H06H21.10
	F42G8.8	F11D5.3		H09F14.1
	F42G9.8	F11F1.8		H10E21.4
	F43C1.1	F11H8.2		H11E01.3
	F43C11.8	F12A10.5		H19M22.3
	F43E2.4	F12A10.7		H20E11.1
	F43E2.8	F12B6.1		H20E11.2
	F43G6.6	F12E12.5		H23L24.3
	F43G9.6	F12F3.1		H23N18.1
	F43G9.8	F13A2.9		H23N18.3
	F44C4.3	F13A7.7		H23N18.5
	F44C8.7	F13B10.1		H24K24.5
	F44E2.2	F13B6.3		H27M09.5
	F44E5.2	F13B9.2		H42K12.3
	F44E7.7	F13B9.6		H43E16.1
	F44F4.11	F13C5.5		JC8.12
	F44F4.6	F13C5.6		K01A12.3
	F44G3.7	F13E6.6		K01A2.11
	F44G4.5	F13E9.11		K01A6.4
	F45B8.3	F13E9.15		K01D12.4
	F45E4.6	F13G11.1		K02A4.1
	F45E4.7	F13G3.1		K02B7.4
	F45E6.4	F13H10.5		K02D3.1
	F45F2.6	F13H10.9		K02D3.2
	F45G2.1	F13H6.1		K02D7.5
	F46A8.5	F13H6.5		K02E10.4
	F46A9.2	F13H8.1		K02E11.10
	F46B6.2	F14A5.1		K02F2.6
	F46B6.9	F14B8.6		K02G10.5
	F46C5.3	F14D12.1		K02G10.7
	F46F5.7	F14D7.11		K03A1.5
	F46G11.1	F14D7.9		K03H6.1
	F46G11.2	F14F3.1		K03H9.2
	F47A4.5	F14F7.5		K03H9.3
	F47B8.11	F14F8.12		K04A8.6
	F47B8.5	F14H3.2		K04C2.8
	F47C10.3	F15A2.6		K04E7.1
	F47C10.4	F15A4.6		K04G2.7
	F47C10.6	F15A8.1		K04H4.2
	F47C10.8	F15A8.5		K05B2.4
	F47C12.2	F15C11.1		K05F1.10
	F47C12.4	F15D3.3		K05F1.9
	F47D12.7	F15D3.8		K06A4.5
	F47E1.2	F15D4.8		K06A9.1
	F47F6.5	F15H10.2		K07C5.7
	F47G6.3	F16B3.1		K07C6.3
	F48A11.2	F16B3.2		K07C6.4
	F48A9.3	F16B3.3		K07C6.5
	F48B9.5	F16B4.12		K07E12.1
	F48E3.9	F16B4.5		K07E8.11
	F48F5.2	F16C3.2		K08B12.1
	F48G7.13	F16F9.3		K08B4.3
	F49B2.3	F16F9.5		K08B4.4
	F49B2.6	F16H9.1		K08C7.5
	F49C12.15	F16H9.2		K08C9.4
	F49C12.3	F17A2.4		K08D10.10
	F49C12.6	F17A2.8		K08D10.9
	F49C12.7	F17B5.4		K08D12.5
	F49C12.8	F17B5.5		K08D8.4
	F49C5.4	F17C8.2		K08E5.2
	F49D11.2	F17C8.5		K08E5.3
	F49E12.7	F17C8.6		K08E7.5
	F49E2.1	F17E5.1		K08E7.7
	F49E8.3	F18A11.2		K08F8.2
	F49F1.10	F18A11.5		K08F8.4
	F49F1.8	F18A12.8		K08F8.7
	F49H12.7	F18C12.1		K09A11.4
	F49H6.8	F18C5.9		K09A9.1
	F52B11.4	F18E3.1		K09B11.10
	F52C6.13	F18E3.4		K09C8.1
	F52D10.5	F18E3.7		K09D9.1
	F52D10.6	F18E9.5		K09E9.1
	F52D2.8	F18E9.6		K10C8.2
	F52E1.4	F19B6.3		K10D11.3
	F52F10.4	F19C7.8		K10D11.6
	F52G3.3	F19D8.1		K10D6.1
	F53B1.7	F19F10.3		K10F12.7
	F53B2.3	F19G12.2		K10G6.5
	F53B3.3	F19G12.4		K10H10.2
	F53B6.6	F19H6.2		K10H10.4
	F53B6.9	F19H8.2		K11D12.5
	F53C11.2	F20A1.1		K11E4.3
	F53C3.1	F20A1.3		K11G9.4
	F53F1.1	F20B10.1		K11H12.10
	F53F1.7	F20B10.3		K11H12.4
	F53F4.4	F20B6.4		M01B2.2
	F53F4.9	F20C5.2		M01B2.6
	F53F8.1	F20C5.3		M01E10.2
	F54A3.4	F20C5.7		M01G12.12
	F54A5.3	F20D1.8		M01G12.9
	F54B11.7	F20D6.10		M01H9.1
	F54B8.2	F20D6.8		M02F4.7
	F54C8.1	F20D6.9		M02G9.1
	F54D1.1	F20E11.15		M02G9.2
	F54D10.4	F20E11.6		M02H5.3
	F54D12.1	F20G2.6		M02H5.6
	F54D12.2	F21A10.4		M03A1.7
	F54E2.5	F21A3.1		M03B6.3
	F54E4.1	F21A3.8		M03F4.6
	F54E4.2	F21A9.1		M03F8.1
	F54F11.1	F21C10.11		M04C3.2
	F54F11.2	F21C10.3		M04G7.1
	F54F11.3	F21C10.4		M05B5.6
	F54F7.2	F21C10.7		M110.9
	F54F7.7	F21C10.8		M142.2
	F54G8.2	F21D12.2		M151.4
	F54G8.5	F21D12.3		M162.8
	F54H12.2	F21E9.3		M163.11
	F54H12.7	F21F12.1		M18.1
	F55C10.2	F21F3.1		M195.1
	F55C12.6	F21F3.5		M195.2
	F55C5.2	F21F8.1		M199.5
	F55C5.9	F21G4.1		M28.8
	F55D12.4	F21G4.5		M7.7
	F55E10.1	F21H11.3		M88.3
	F55F3.4	F21H12.3		M88.6
	F55G11.5	F21H12.7		R01H10.4
	F55G11.9	F21H7.11		R02C2.7
	F56A12.2	F21H7.12		R02D1.1
	F56B3.9	F21H7.4		R02D3.1
	F56C4.1	F22B8.1		R02D5.3
	F56C9.7	F22D6.15		R02E4.3
	F56D2.8	F22E12.1		R02F11.1
	F56D6.13	F22E12.2		R03H4.1
	F56F4.9	F22E12.3		R03H4.6
	F56H6.12	F22E5.13		R04B3.1
	F56H9.6	F22E5.21		R04B3.3
	F57B1.3	F22E5.6		R04B5.3
	F57B9.10	F22G12.2		R05C11.1
	F57B9.6	F22H10.3		R05G6.9
	F57C12.3	F22H10.4		R05H10.6
	F57F4.1	F23B2.5		R06C7.10
	F57F4.3	F23C8.12		R06C7.3
	F57F5.2	F23C8.13		R07A4.2
	F57G4.4	F23F1.4		R07A4.4
	F57G8.4	F23F12.10		R07B1.13
	F57H12.4	F23F12.3		R07B1.5
	F58A6.10	F23H11.7		R07C12.4
	F58B3.8	F23H11.8		R07D5.1
	F58B4.2	F23H12.8		R07E3.6
	F58D5.7	F23H12.9		R07E4.1
	F58E1.13	F25B3.2		R07E5.4
	F58E1.2	F25B3.3		R07G3.6
	F58E1.9	F25E2.3		R08B4.1
	F58G1.3	F25E5.4		R08F11.3
	F58G1.9	F25E5.7		R08F11.4
	F58G6.4	F25H5.2		R08H2.1
	F58H1.4	F25H8.5		R09A1.3
	F58H7.1	F26A1.4		R09A8.4
	F59A1.11	F26A1.6		R09D1.4
	F59A1.7	F26C11.2		R09D1.5
	F59A3.8	F26C11.4		R09E10.1
	F59A6.3	F26D10.11		R09E10.5
	F59A6.4	F26D11.10		R09E12.9
	F59B1.4	F26D11.4		R09H10.4
	F59B1.7	F26D2.1		R102.8
	F59C6.3	F26F2.1		R10D12.1
	F59C6.8	F26F2.3		R10D12.6
	F59D12.3	F26F2.5		R10F2.1
	F59E11.2	F26G1.7		R10H1.2
	F59E12.4	F26G1.9		R10H1.4
	F59E12.5	F27B3.7		R10H1.5
	F59F4.1	F27D4.4		R11.2
	F59F5.5	F27D9.6		R11A5.7
	F59H6.2	F27D9.8		R11F4.3
	H02I12.3	F28A10.7		R11G11.6
	H03E18.2	F28B12.1		R12A1.3
	H04M03.1	F28B4.2		R12E2.14
	H06I04.5	F28C12.1		R12E2.5
	H08M01.1	F28C12.4		R13F6.6
	H11L12.1	F28C6.9		R13H4.3
	H12D21.11	F28E10.1		R13H4.5
	H12I13.1	F28E10.2		R13H4.8
	H14N18.2	F28F9.1		R148.7
	H19J13.1	F28H1.5		R17.3
	H22K11.3	F29B9.12		R186.6
	H23L24.4	F29C4.4		R57.2
	H23N18.2	F29F11.5		SSSD1.1
	H25K10.1	F29G6.2		T01B10.2
	H25K10.4	F29G9.4		T01B7.7
	H32C10.1	F30A10.11		T01C2.1
	H32C10.3	F30A10.8		T01D1.4
	H37A05.2	F30F8.2		T01G9.3
	JC8.11	F30F8.5		T02B11.4
	K01C8.10	F31A3.4		T02D1.5
	K01D12.2	F31B12.1		T02E9.2
	K01D12.3	F31D4.6		T02G5.6
	K01D12.5	F31E3.2		T03D8.4
	K01G5.7	F31E8.2		T03D8.5
	K02A2.5	F31F6.4		T03D8.6
	K02C4.2	F31F6.6		T03F7.5
	K02E10.7	F32A11.6		T03G11.8
	K02E2.1	F32A5.4		T03G6.1
	K02E2.2	F32A5.6		T04B2.3
	K02E2.8	F32A6.4		T04C12.7
	K02F6.1	F32A7.3		T04G9.2
	K02F6.6	F32A7.8		T04H1.9
	K03A11.3	F32B4.2		T05A1.1
	K03A11.4	F32B4.6		T05A1.5
	K03B8.2	F32B5.7		T05B4.3
	K03H1.1	F32B6.7		T05C1.3
	K03H1.12	F32D1.3		T05C12.10
	K03H1.13	F32D8.10		T05D4.4
	K03H1.9	F32D8.7		T05F1.9
	K03H4.1	F32F2.1		T06A4.3
	K04C2.7	F32G8.4		T06D8.10
	K04F1.10	F32H2.6		T06D8.3
	K04F1.12	F32H5.5		T06E4.6
	K04F10.2	F33A8.2		T06E4.9
	K05C4.4	F33A8.6		T06G6.6
	K05F1.1	F33D11.1		T06H11.1
	K05F1.3	F33D4.3		T07A5.3
	K05F6.9	F33E11.1		T07D1.5
	K06A1.2	F33G12.6		T07F10.4
	K06B9.2	F33H1.6		T07G12.2
	K06B9.4	F34D10.5		T07H3.2
	K06C4.17	F34H10.2		T07H6.1
	K06C4.9	F34H10.3		T07H8.5
	K07C6.11	F35A5.1		T07H8.6
	K07D4.6	F35B12.3		T08B2.2
	K07D8.1	F35B12.6		T08G5.3
	K07E8.5	F35B12.7		T09A12.1
	K07G5.4	F35B12.9		T09B9.2
	K07H8.5	F35B3.7		T09H2.1
	K08A8.1	F35C11.2		T10B10.1
	K08B4.5	F35C11.3		T10B5.10
	K08C9.1	F35C11.7		T10B9.4
	K08E3.1	F35C12.2		T10E9.9
	K08E4.5	F35C5.10		T10H10.1
	K08E7.3	F35D11.10		T11B7.4
	K08E7.9	F35D11.11		T11F8.4
	K08F8.5	F35D11.9		T12A7.1
	K08H10.6	F35D2.5		T12A7.9
	K08H2.5	F35E8.6		T12D8.5
	K09B11.4	F35F10.11		T13C2.2
	K09B3.1	F35F10.14		T13C5.3
	K09C4.5	F35F10.6		T13C5.7
	K09C6.7	F35G12.6		T13H5.2
	K09D9.2	F35H8.5		T14B4.6
	K09E10.2	F36A2.10		T14B4.7
	K09F5.2	F36A2.12		T14D7.2
	K09H9.3	F36A2.14		T16G1.1
	K10B3.8	F36A4.11		T16G1.2
	K10B3.9	F36A4.4		T16G1.5
	K10C2.5	F36D1.10		T16G1.6
	K10C9.8	F36D1.4		T16G1.8
	K10D11.5	F36D1.5		T17A3.1
	K10D2.2	F36D3.10		T17A3.10
	K10D2.6	F36G3.3		T17H7.1
	K10G4.13	F36H12.10		T17H7.7
	K10G4.4	F36H2.3		T18D3.4
	K10G6.2	F36H2.5		T18H9.1
	K10H10.1	F36H5.2		T19A5.3
	K11C4.1	F36H9.7		T19B10.1
	K11D9.1	F36H9.8		T19B10.2
	K11G9.1	F37A4.5		T19B10.5
	K11G9.3	F37A4.7		T19B10.9
	K11H12.3	F37A8.5		T19C3.2
	K11H12.5	F37B1.1		T19C4.5
	K12B6.8	F37B1.4		T19D12.5
	K12D9.1	F37C12.14		T19D12.6
	K12G11.1	F37C12.16		T19D12.9
	K12G11.4	F37C12.18		T19D7.3
	M01A12.3	F37C4.7		T19D7.7
	M01A12.4	F37F2.3		T19H12.1
	M01D7.1	F38A1.1		T19H12.5
	M01E11.4	F38A5.14		T20F5.4
	M01G12.14	F38A6.1		T20H9.3
	M01G12.7	F38A6.4		T21B10.6
	M02D8.7	F38B7.1		T21B6.3
	M02F4.1	F38B7.7		T21D12.2
	M02G9.3	F38E1.11		T21D12.7
	M02H5.10	F38E1.8		T21E8.1
	M02H5.11	F38E11.7		T21E8.2
	M02H5.4	F38G1.2		T21F2.1
	M02H5.7	F38H12.1		T21H3.2
	M03D4.4	F38H12.2		T22A3.4
	M03E7.4	F39B2.8		T22B11.2
	M04C7.4	F39C12.2		T22B11.4
	M04C9.1	F39E9.6		T22B3.1
	M04C9.5	F40C5.2		T22C8.7
	M04F3.3	F40D4.11		T22E5.7
	M110.2	F40E10.2		T22H2.5
	M151.2	F40F4.5		T23B3.3
	M151.6	F40F8.12		T23B3.4
	M153.5	F40F8.4		T23C6.3
	M162.11	F40F8.8		T23E1.1
	M162.5	F40F9.8		T23F1.5
	M176.1	F40G9.6		T23F1.6
	M28.10	F41B4.1		T23F2.1
	M28.2	F41B4.2		T23F4.4
	M28.9	F41B4.3		T23F6.5
	M6.4	F41B4.4		T23G5.5
	M70.1	F41C3.2		T23H4.1
	M70.3	F41D3.3		T23H4.3
	M88.1	F41D9.1		T24A6.7
	M88.4	F41E6.10		T24C4.3
	PAR2.3	F41E6.2		T24C4.7
	R01B10.5	F41E7.7		T24C4.8
	R01E6.2	F41E7.8		T24E12.5
	R01E6.4	F41G4.3		T24H10.7
	R01H2.2	F41H8.4		T25C12.4
	R02E4.1	F42C5.7		T25C8.2
	R03C1.1	F42E11.2		T25E12.12
	R03G5.1	F42E11.4		T25E12.13
	R04B5.7	F42E8.2		T25E4.1
	R04D3.1	F42F12.10		T26C5.2
	R05D3.12	F42G10.1		T26E4.12
	R05D8.7	F42G9.9		T26H2.3
	R05F9.12	F43A11.1		T27A10.6
	R05F9.5	F43A11.4		T27A3.5
	R05F9.6	F43B10.1		T27B1.2
	R06A4.10	F43B10.2		T27B7.4
	R06C1.2	F43C11.10		T27C10.4
	R07B1.8	F43C11.3		T27C4.2
	R07B1.9	F43C9.2		T27C5.8
	R07B7.12	F43E2.3		T27F2.4
	R07C3.10	F43E2.9		T27F6.8
	R07C3.12	F43G6.4		T28B11.1
	R07E5.15	F43G9.11		T28D6.2
	R07E5.17	F44A2.5		T28D9.11
	R07E5.6	F44C4.5		T28D9.9
	R07G3.2	F44C8.8		T28F3.5
	R07H5.11	F44E5.4		W01A11.4
	R08A2.2	F44E5.5		W01C9.4
	R08A2.5	F44F1.4		W01C9.5
	R08C7.12	F44F4.1		W01F3.3
	R08C7.5	F44F4.10		W02B8.6
	R08D7.7	F44F4.3		W02C12.1
	R08E3.1	F45B8.4		W02D9.10
	R08F11.1	F45C12.3		W02F12.2
	R09B5.7	F45D11.15		W03B1.2
	R09D1.2	F45D11.16		W03F9.4
	R09E10.2	F45E1.4		W03G1.5
	R09E10.3	F45E4.4		W04D2.1
	R09E10.6	F45E4.5		W04G3.1
	R09H10.5	F45F2.5		W04G3.2
	R102.1	F45G2.2		W04G3.3
	R102.3	F45H10.5		W04G3.8
	R102.7	F45H7.2		W05B2.5
	R105.1	F45H7.6		W05B2.7
	R106.1	F46A8.4		W05B5.3
	R10E9.3	F46B3.15		W06A11.1
	R11A8.3	F46B3.2		W06B3.1
	R11A8.6	F46B6.11		W06B3.2
	R11E3.1	F46C5.7		W06D12.1
	R11G10.2	F46C8.5		W06F12.3
	R11G10.3	F46E10.11		W06H8.8
	R12C12.8	F46F11.11		W08E12.2
	R12E2.10	F46F11.7		W08E12.3
	R12G8.1	F46F3.3		W08F4.6
	R12H7.4	F46F5.1		W08F4.9
	R134.1	F46F6.4		W09G10.6
	R134.2	F46G10.2		W09G12.10
	R13A1.4	F46G11.4		W10C8.4
	R13A1.5	F46H5.8		Y102A11A.2
	R13A5.4	F47A4.1		Y102A11A.3
	R13D11.3	F47A4.3		Y102A11A.9
	R13D7.11	F47B10.7		Y104H12A.1
	R13H4.7	F47B10.8		Y105E8A.12
	R166.2	F47B3.3		Y105E8A.13
	R186.5	F47B3.5		Y105E8A.7
	R193.2	F47C12.6		Y105E8B.9
	T01A4.1	F47D12.1		Y106G6H.13
	T01B11.1	F47D12.6		Y110A2AL.8
	T01B11.7	F47D2.4		Y113G7B.3
	T01B7.8	F47D2.6		Y116F11B.1
	T01C3.5	F47F2.1		Y119C1B.1
	T01C4.1	F47G4.5		Y119D3A.1
	T01D1.8	F47G4.8		Y119D3A.2
	T01D3.2	F48B9.4		Y119D3B.7
	T01G5.5	F48C1.1		Y11D7A.14
	T01H10.1	F48C1.3		Y11D7A.5
	T01H10.2	F48C5.2		Y11D7A.9
	T01H3.4	F48E3.1		Y17D7B.2
	T02C12.4	F48E3.2		Y17D7B.3
	T02E1.7	F48E3.6		Y17G7B.11
	T02G5.11	F48F5.6		Y17G7B.14
	T02G6.2	F48F7.8		Y17G7B.22
	T02G6.7	F48G7.10		Y18D10A.23
	T03F1.5	F48G7.11		Y18D10A.7
	T03F7.6	F48G7.4		Y18H1A.12
	T04A6.4	F48G7.7		Y18H1A.13
	T04A8.7	F49B2.4		Y22D7AL.14
	T04B2.7	F49B2.5		Y22D7AR.9
	T04C10.3	F49C12.10		Y22F5A.6
	T04F8.4	F49C5.2		Y26D4A.3
	T04H1.8	F49E10.3		Y2C2A.1
	T05A10.4	F49E10.5		Y2H9A.3
	T05A7.7	F49E11.8		Y32F6B.2
	T05A7.8	F49E12.4		Y32F6B.3
	T05A8.7	F49E12.5		Y32G9A.6
	T05B11.4	F49E2.4		Y32G9B.1
	T05B4.1	F49F1.12		Y37A1B.7
	T05B9.2	F49F1.5		Y37E11AL.1
	T05C12.1	F49F1.9		Y37E11AR.7
	T05C12.4	F49H6.5		Y38A10A.2
	T05E11.3	F52B10.2		Y38C1BA.3
	T05E8.1	F52B10.3		Y38C9B.1
	T05H4.7	F52C6.12		Y38E10A.19
	T06A10.2	F52C6.14		Y38E10A.5
	T06A4.1	F52D10.1		Y38F1A.3
	T06C10.3	F52D10.4		Y38F1A.8
	T06D4.4	F52D2.1		Y38H6C.11
	T06E4.10	F52D2.9		Y38H6C.5
	T06E4.5	F52E1.5		Y38H6C.8
	T06E4.7	F52E1.9		Y38H6C.9
	T06E4.8	F52E10.3		Y39A1A.9
	T06E6.13	F52E10.4		Y39A3A.4
	T06E6.5	F52E4.6		Y39D8A.1
	T07A9.1	F52F12.5		Y39D8B.3
	T07C12.8	F52F12.8		Y39D8C.1
	T07C5.3	F52H2.3		Y39H10A.4
	T08B1.1	F52H2.4		Y40B10B.1
	T08B2.3	F53A2.11		Y40D12A.2
	T08B6.2	F53A2.2		Y41D4B.15
	T08B6.6	F53A2.9		Y41D4B.16
	T08D2.1	F53A9.6		Y41D4B.18
	T08D2.2	F53A9.7		Y41E3.2
	T08D2.4	F53A9.9		Y41G9A.2
	T08D2.6	F53B6.2		Y41G9A.5
	T08D2.7	F53B6.8		Y42A5A.2
	T08G2.2	F53B7.5		Y42A5A.4
	T08G3.7	F53C3.6		Y42H9B.1
	T09A12.3	F53F10.1		Y43F8A.2
	T09D3.1	F53F4.13		Y43F8B.14
	T09E11.10	F53H4.5		Y45G5AM.6
	T09F3.3	F54A5.2		Y46C8AL.5
	T09F5.10	F54B11.10		Y46D2A.1
	T10B5.8	F54B8.4		Y46G5A.22
	T10E10.3	F54C1.9		Y46G5A.29
	T10E10.5	F54C9.11		Y46H3A.2
	T10E9.4	F54C9.4		Y46H3D.6
	T10E9.5	F54D1.4		Y46H3D.7
	T10G3.4	F54D10.2		Y47D3B.1
	T10H4.2	F54D12.11		Y47D7A.13
	T11A5.1	F54D12.9		Y47D7A.5
	T11F8.2	F54D7.3		Y47H9C.1
	T11F8.3	F54E2.3		Y48B6A.4
	T11F9.9	F54E2.6		Y48C3A.11
	T12A7.2	F54F2.2		Y49E10.25
	T12A7.4	F54F3.4		Y4C6A.2
	T12B3.2	F54F7.3		Y50D4B.2
	T13A10.10	F54F7.8		Y51A2D.13
	T13A10.12	F54G2.1		Y51A2D.5
	T13B5.7	F54G2.2		Y51H4A.25
	T13C2.6	F54G8.1		Y51H4A.7
	T13F3.1	F54G8.4		Y52B11B.1
	T13G4.5	F54H5.4		Y53C12C.1
	T13H5.3	F55A12.7		Y53F4B.25
	T14B1.2	F55A4.2		Y53F4B.27
	T14B4.5	F55C12.7		Y53G8AR.7
	T14B4.9	F55C5.10		Y53H1B.1
	T14C1.1	F55C9.3		Y54E10BR.7
	T14E8.4	F55C9.6		Y54F10AM.6
	T14G10.5	F55D1.1		Y54F10BM.11
	T14G8.2	F55D1.2		Y54G2A.25
	T15B12.2	F55D12.6		Y54G2A.37
	T15B7.16	F55E10.2		Y54G2A.4
	T16A1.7	F55G1.1		Y54G2A.41
	T16A9.5	F55G11.6		Y55F3AM.10
	T16G12.1	F55H12.6		Y57A10A.24
	T16G12.3	F56A11.7		Y57G11C.41
	T16G12.7	F56A3.5		Y57G11C.42
	T16H12.6	F56A4.10		Y57G11C.6
	T19B10.3	F56A8.7		Y58A7A.3
	T19C3.6	F56C11.2		Y58A7A.4
	T19C9.8	F56C3.8		Y59A8B.20
	T19D2.1	F56C4.3		Y59H11AL.1
	T19E7.2	F56C4.4		Y60C6A.1
	T19H12.10	F56D12.4		Y62F5A.10
	T19H12.11	F56D5.1		Y65B4BL.1
	T19H12.6	F56D6.15		Y65B4BR.1
	T19H5.1	F56D6.5		Y65B4BR.2
	T20D4.16	F56D6.7		Y67A10A.8
	T20D4.3	F56E3.3		Y67A6A.2
	T20D4.5	F56G4.7		Y69A2AL.1
	T20D4.6	F56H11.3		Y70C5C.2
	T20D4.9	F57A8.3		Y70C5C.6
	T20F10.1	F57A8.4		Y70D2A.1
	T20G5.6	F57B10.8		Y71D11A.1
	T21B4.7	F57B7.1		Y71F9AL.2
	T21C12.2	F57C7.3		Y71G12B.17
	T21C9.11	F57F10.1		Y71G12B.2
	T21C9.9	F57G8.5		Y71G12B.25
	T21D11.1	F57H12.1		Y71H2AM.15
	T21D9.1	F57H12.2		Y71H2AM.22
	T21E8.3	F57H12.3		Y73B6BL.22
	T21E8.7	F57H12.5		Y73B6BL.28
	T21G5.1	F57H12.7		Y73C8B.3
	T21H8.3	F58A3.1		Y73E7A.8
	T21H8.4	F58A3.2		Y73F8A.5
	T22B11.3	F58A3.5		Y74E4A.1
	T22B2.2	F58A4.14		Y75B7AL.1
	T22B2.5	F58A6.9		Y75B7AR.1
	T22B2.6	F58B4.3		Y75B8A.20
	T22B3.2	F58E10.2		Y75B8A.3
	T22B3.3	F58E10.7		Y75B8A.39
	T22D1.2	F58E6.10		Y80D3A.5
	T22D1.9	F58E6.7		Y80D3A.7
	T22F3.8	F58F12.4		Y82E9BL.10
	T22F7.3	F58F9.1		Y82E9BL.12
	T22F7.5	F58F9.9		Y82E9BL.15
	T22H9.3	F58G1.6		Y82E9BL.19
	T23D5.2	F58G1.7		Y87G2A.15
	T23D5.6	F58G1.8		Y87G2A.2
	T23F6.1	F58H1.7		Y8A9A.3
	T23F6.2	F58H10.1		Y94H6A.10
	T23G4.4	F58H7.3		Y97E10B.10
	T23H2.4	F59A6.10		Y9C9A.3
	T24A11.3	F59A7.2		ZC101.2
	T24A6.4	F59A7.5		ZC101.3
	T24A6.8	F59B1.1		ZC123.1
	T24C2.1	F59B1.9		ZC13.10
	T24D11.1	F59B10.2		ZC13.3
	T24D5.5	F59B10.3		ZC239.12
	T24D8.4	F59B10.6		ZC250.3
	T24E12.3	F59C6.14		ZC250.5
	T25B2.3	F59C6.6		ZC317.3
	T25B6.3	F59C6.7		ZC328.1
	T25B6.5	F59D12.1		ZC334.2
	T25B6.6	F59D6.7		ZC374.2
	T25B9.6	F59E11.12		ZC410.1
	T25C8.1	F59E11.13		ZC412.5
	T25G12.6	F59E11.5		ZC434.3
	T25G3.2	F59E11.8		ZC443.1
	T26A8.2	F59F3.4		ZC443.5
	T26C12.4	F59F3.6		ZC443.6
	T26C12.6	F59F5.6		ZC449.1
	T26E3.8	F59H6.6		ZC449.2
	T26E4.4	F59H6.7		ZC455.1
	T27A1.7	H01A20.1		ZC455.10
	T27C5.12	H01G02.3		ZC455.6
	T27D1.3	H01M10.2		ZC47.13
	T27E7.6	H02K04.2		ZC47.14
	T27F6.1	H03G16.6		ZC47.4
	T28A11.13	H04M03.2		ZC47.5
	T28A11.15	H05C05.3		ZC477.7
	T28A11.17	H05G16.1		ZC513.1
	T28A11.20	H05L03.3		ZC513.11
	T28B4.2	H06A10.1		ZC513.2
	T28C12.2	H06H21.2		ZK1010.7
	T28C12.3	H06I04.6		ZK1025.3
	T28F2.7	H08J11.2		ZK1025.7
	T28F3.4	H08J19.1		ZK1025.9
	T28F3.8	H08M01.2		ZK1037.5
	T28F4.1	H10D18.5		ZK1055.6
	T28F4.2	H10E21.5		ZK1055.7
	T28H11.1	H11E01.1		ZK1058.6
	T28H11.5	H12D21.9		ZK1067.7
	T28H11.7	H12I13.5		ZK112.7
	T28H11.8	H12I13.6		ZK1193.4
	VW02B12L.1	H12I19.2		ZK1290.10
	VY35H6BL.1	H13N06.2		ZK1290.12
	W01A8.7	H13N06.7		ZK1290.2
	W01B6.2	H14N18.1		ZK1290.3
	W01C8.6	H16D19.1		ZK1290.8
	W02A2.3	H16O14.1		ZK1307.3
	W02B12.12	H19M22.2		ZK1307.7
	W02B3.3	H20J04.1		ZK1320.4
	W02B3.6	H23L24.1		ZK154.1
	W02B8.3	H24G06.1		ZK154.6
	W02B8.4	H25P06.4		ZK180.1
	W02F12.7	H27D07.4		ZK180.5
	W02G9.4	H31B20.1		ZK180.6
	W02H5.7	H31G24.1		ZK20.1
	W03B1.8	H32C10.2		ZK262.2
	W03D8.2	H32K21.1		ZK265.8
	W03D8.9	H34P18.1		ZK287.1
	W03F11.2	H35N09.1		ZK377.1
	W03F11.4	H36L18.1		ZK381.2
	W03G1.1	H38K22.5		ZK455.3
	W03G9.5	H41C03.1		ZK455.4
	W03H1.2	K01A11.1		ZK455.7
	W04C9.6	K01A12.2		ZK507.1
	W04E12.2	K01A2.1		ZK546.11
	W04G3.10	K01A2.10		ZK596.1
	W04G5.2	K01A2.3		ZK596.3
	W04G5.4	K01A2.5		ZK6.11
	W04G5.9	K01A6.5		ZK617.2
	W05B2.2	K01B6.1		ZK643.1
	W05B2.4	K01B6.3		ZK662.2
	W05B5.2	K01D12.12		ZK678.5
	W05G11.4	K01D12.9		ZK678.8
	W06A11.3	K01F9.2		ZK682.5
	W06D11.4	K02A2.1		ZK697.6
	W06D12.5	K02A4.2		ZK783.1
	W06D4.2	K02B12.1		ZK792.4
	W06D4.4	K02B12.6		ZK809.1
	W06G6.9	K02B7.3		ZK813.4
	W06H8.2	K02C4.4		ZK813.5
	W07A12.7	K02D10.2		ZK822.3
	W07A12.8	K02D10.4		ZK822.5
	W07B8.5	K02D7.2		ZK829.3
	W07G1.1	K02E10.8		ZK836.1
	W07G4.6	K02E11.3		ZK84.1
	W08E12.6	K02E11.5		ZK84.7
	W08F4.2	K02E11.7		ZK896.5
	W08G11.1	K02E7.6		ZK896.6
	W09C3.6	K02F2.5		ZK899.4
	W09C5.4	K02F3.8
	W09D6.4	K02F6.3
	W10C4.1	K02F6.9
	W10C8.5	K02G10.4
	W10G11.10	K02H11.4
	Y102A5B.1	K02H11.6
	Y102A5B.2	K03A11.2
	Y102A5B.3	K03A11.5
	Y102A5C.32	K03B4.4
	Y104H12BR.1	K03B8.9
	Y105C5A.8	K03C7.2
	Y105C5B.18	K03E6.5
	Y105C5B.2	K04A8.8
	Y105C5B.6	K04B12.1
	Y106G6A.4	K04C2.6
	Y106G6E.1	K04D7.4
	Y10G11A.3	K04F1.9
	Y110A2AL.2	K04G11.2
	Y110A7A.14	K04G11.5
	Y111B2A.27	K04H4.5
	Y113G7B.15	K04H4.7
	Y113G7C.1	K04H8.1
	Y116A8A.8	K05B2.5
	Y116A8B.1	K05C4.10
	Y116A8C.14	K05C4.2
	Y116A8C.23	K05F1.6
	Y116A8C.4	K05F6.3
	Y116A8C.40	K05F6.8
	Y116A8C.5	K05G3.1
	Y116F11A.3	K06A1.1
	Y116F11B.2	K06A4.6
	Y119C1B.11	K06A5.8
	Y119D3A.3	K06B4.12
	Y119D3A.4	K06B4.3
	Y11D7A.8	K06B9.1
	Y13C8A.1	K07A1.14
	Y17D7B.1	K07A1.3
	Y17G7B.23	K07A12.5
	Y17G7B.5	K07A3.2
	Y17G9B.7	K07A3.3
	Y18D10A.18	K07A9.2
	Y18D10A.4	K07C5.9
	Y18H1A.1	K07D4.2
	Y22D7AR.12	K07D4.9
	Y22D7AR.7	K07E8.6
	Y22D7AR.8	K07F5.5
	Y25C1A.1	K07H8.12
	Y25C1A.10	K07H8.8
	Y25C1A.11	K08B4.7
	Y26D4A.4	K08B5.1
	Y32B12A.3	K08B5.2
	Y32B12B.3	K08C7.3
	Y32F6A.2	K08C7.7
	Y32F6A.5	K08D12.2
	Y32F6A.6	K08D12.4
	Y34F4.3	K08D12.6
	Y34F4.4	K08D12.7
	Y35H6.3	K08D8.1
	Y37A1A.4	K08D8.2
	Y37A1B.13	K08E7.6
	Y37E11B.10	K08E7.8
	Y37E3.16	K08F4.6
	Y37F4.1	K08H2.2
	Y37H9A.2	K09A9.6
	Y38A8.2	K09C4.2
	Y38C1AA.6	K09C4.7
	Y38C1AB.8	K09C4.9
	Y38E10A.7	K09C8.6
	Y38H6C.24	K09C8.7
	Y38H8A.1	K09D9.7
	Y38H8A.3	K09D9.8
	Y39A1A.16	K09E2.4
	Y39A1B.2	K09E4.6
	Y39A3A.2	K09E9.4
	Y39A3B.1	K09F5.4
	Y39B6A.1	K09F5.6
	Y39B6A.23	K09F6.9
	Y39B6A.25	K09H11.10
	Y39B6A.27	K10B3.10
	Y39B6A.31	K10B3.6
	Y39C12A.7	K10B4.3
	Y39E4B.4	K10C2.7
	Y39F10C.1	K10C3.6
	Y39G8B.5	K10C8.4
	Y40B10A.2	K10C9.1
	Y40B10A.5	K10C9.9
	Y40C5A.2	K10D11.1
	Y40C5A.3	K10D2.7
	Y40H7A.4	K10D3.4
	Y40H7A.8	K10D6.2
	Y41C4A.1	K10F12.4
	Y41C4A.7	K10G4.3
	Y41D4A.1	K10G6.4
	Y41D4B.17	K10H10.3
	Y41E3.19	K11C4.5
	Y42G9A.4	K11D12.1
	Y42H9AR.2	K11D12.10
	Y43B11AR.3	K11D12.9
	Y43D4A.5	K11G12.2
	Y43E12A.1	K11G12.4
	Y43E12A.3	K11H3.7
	Y43F8B.19	K12B6.4
	Y43F8C.1	K12C11.3
	Y43F8C.5	K12C11.7
	Y44A6B.2	K12D9.5
	Y44A6B.3	K12F2.2
	Y44A6D.5	K12H4.1
	Y45F10A.2	M01A10.2
	Y45F10D.14	M01A12.1
	Y46C8AL.1	M01A8.1
	Y46C8AL.4	M01B2.3
	Y46C8AR.3	M01B2.9
	Y46G5A.30	M01E11.7
	Y46H3A.1	M01F1.1
	Y46H3A.5	M01G12.13
	Y47D3A.10	M01G12.4
	Y47D3A.2	M01G12.5
	Y47D3B.6	M01G12.6
	Y47D7A.15	M01H9.5
	Y47D9A.1	M02A10.1
	Y48B6A.5	M02B1.4
	Y48B6A.7	M02B7.6
	Y48G1C.5	M02D8.2
	Y48G8AL.12	M02E1.2
	Y49C4A.9	M02E1.3
	Y49E10.1	M02F4.3
	Y49F6A.1	M02H5.5
	Y49G5A.1	M03A8.4
	Y4C6A.1	M03B6.1
	Y4C6A.3	M03B6.5
	Y50D4B.3	M03C11.1
	Y50D4B.4	M03E7.1
	Y50E8A.10	M03F4.2
	Y50E8A.6	M03F8.6
	Y50E8A.9	M04B2.5
	Y51A2D.12	M04B2.6
	Y51B9A.6	M04C3.1
	Y51B9A.8	M04C3.3
	Y51H4A.12	M04C7.3
	Y51H7BR.4	M04D5.3
	Y52B11A.7	M04D8.2
	Y53C10A.2	M04D8.3
	Y53C10A.3	M04D8.5
	Y53F4B.19	M04F3.2
	Y53F4B.28	M04G12.4
	Y53G8AR.1	M04G7.3
	Y54E10BL.2	M05B5.2
	Y54E2A.1	M05D6.8
	Y54E5A.1	M110.8
	Y54F10BL.1	M117.3
	Y54F10BM.4	M142.4
	Y54G11A.13	M153.4
	Y54G2A.21	M163.1
	Y54G2A.45	M163.9
	Y55B1AR.3	M176.10
	Y55B1AR.4	M176.6
	Y55B1BR.1	M199.6
	Y55F3AM.2	M199.8
	Y55H10A.2	M28.7
	Y56A3A.14	M6.1
	Y57A10C.7	M60.7
	Y57E12AL.2	M7.10
	Y57E12AL.4	M7.12
	Y57E12B.4	M70.2
	Y57G11A.2	PDB1.1
	Y57G11A.5	R01E6.6
	Y57G11B.97	R01H10.3
	Y57G11C.18	R01H10.5
	Y57G11C.32	R01H10.6
	Y57G7A.6	R01H2.1
	Y59E9AL.6	R01H2.7
	Y5H2B.7	R01H2.8
	Y61B8B.1	R02C2.4
	Y62E10A.14	R02D5.4
	Y62H9A.1	R02D5.7
	Y62H9A.10	R02D5.9
	Y63D3A.10	R02E12.5
	Y65B4BL.5	R02F2.2
	Y66A7A.6	R03A10.6
	Y67A10A.1	R03C1.3
	Y67A10A.11	R03E9.4
	Y67D8C.1	R03G5.6
	Y69A2AR.14	R03G5.7
	Y69A2AR.15	R03H10.2
	Y69A2AR.19	R03H4.2
	Y69A2AR.9	R03H4.3
	Y69E1A.1	R03H4.4
	Y69E1A.2	R04B5.6
	Y69H2.12	R05A10.2
	Y6B3B.1	R05A10.3
	Y6B3B.10	R05A10.4
	Y6B3B.3	R05C11.4
	Y6E2A.7	R05D7.1
	Y70C5C.1	R05D8.3
	Y70D2A.2	R05D8.9
	Y71A12B.13	R05F9.13
	Y71F9AL.17	R05F9.8
	Y71G12A.4	R05G6.10
	Y71G12B.22	R05G9.2
	Y71G12B.3	R05G9R.1
	Y71G12B.32	R05H10.1
	Y71G12B.5	R05H5.6
	Y71H2AR.2	R05H5.7
	Y73B3A.12	R06A10.3
	Y73B3A.13	R06A10.5
	Y73B3A.3	R06B10.4
	Y73B3A.9	R06F6.6
	Y73B6BL.12	R07B1.6
	Y73B6BL.23	R07B7.11
	Y73B6BL.26	R07B7.16
	Y73B6BL.37	R07C12.1
	Y73B6BL.38	R07C3.14
	Y73B6BL.39	R07E3.2
	Y73B6BL.4	R07E3.7
	Y73C8A.1	R07G3.8
	Y73C8B.4	R08A2.1
	Y73C8C.10	R08B4.2
	Y73F8A.2	R08C7.11
	Y73F8A.20	R08E3.4
	Y73F8A.35	R09A8.5
	Y75B8A.21	R09B3.2
	Y75B8A.28	R09B5.2
	Y75B8A.33	R09D1.10
	Y75D11A.3	R09D1.12
	Y7A9A.1	R09E10.4
	Y80D3A.8	R09F10.4
	Y81G3A.4	R09F10.7
	Y82E9BL.11	R09F10.9
	Y82E9BL.2	R09G11.1
	Y82E9BL.4	R102.2
	Y82E9BR.20	R102.9
	Y82E9BR.8	R106.2
	Y87G2A.11	R10D12.17
	Y8A9A.6	R10E11.9
	Y94H6A.1	R10E9.2
	Y94H6A.2	R10F2.4
	Y97E10AR.8	R10H10.6
	Y97E10B.7	R11E3.5
	ZC116.3	R11F4.2
	ZC132.9	R11G1.6
	ZC142.1	R11G11.7
	ZC15.1	R11H6.3
	ZC15.5	R12B2.7
	ZC155.2	R12B2.8
	ZC190.5	R12C12.10
	ZC190.7	R12C12.4
	ZC21.6	R12E2.15
	ZC239.5	R12E2.7
	ZC239.7	R12H7.1
	ZC247.2	R13.2
	ZC317.2	R13A1.10
	ZC328.2	R13A1.8
	ZC334.1	R13A5.10
	ZC404.5	R13A5.3
	ZC412.2	R13A5.9
	ZC416.6	R13D11.10
	ZC449.3	R13D11.8
	ZC504.2	R13D11.9
	ZC504.5	R13D7.2
	ZC513.3	R13H7.2
	ZC518.4	R13H9.1
	ZC53.6	R13H9.4
	ZC581.6	R13H9.5
	ZC581.7	R148.1
	ZC64.4	R151.4
	ZC84.1	R160.6
	ZC84.2	R173.4
	ZC84.6	R186.1
	ZK1010.5	R186.2
	ZK1010.9	R52.5
	ZK1037.13	R53.3
	ZK105.4	R53.8
	ZK105.6	R90.1
	ZK1053.1	R90.2
	ZK1053.2	R90.3
	ZK1055.4	R90.4
	ZK1055.5	R90.5
	ZK1067.5	T01B10.4
	ZK1067.8	T01B6.1
	ZK112.4	T01B6.4
	ZK112.6	T01C1.2
	ZK1127.2	T01C3.4
	ZK1193.2	T01D1.6
	ZK1193.3	T01D3.3
	ZK1225.1	T01E8.8
	ZK1225.4	T01G1.2
	ZK1240.6	T01G5.6
	ZK1240.8	T01G6.3
	ZK1248.5	T02B11.3
	ZK1290.6	T02C1.2
	ZK1320.5	T02C5.5
	ZK228.4	T02D1.6
	ZK228.5	T02E1.1
	ZK250.7	T02E9.1
	ZK262.3	T02E9.3
	ZK265.5	T02E9.5
	ZK265.9	T02G5.1
	ZK354.2	T02G6.1
	ZK354.8	T02H6.3
	ZK380.1	T03E6.1
	ZK381.3	T03E6.2
	ZK418.2	T03E6.5
	ZK430.3	T03F6.4
	ZK455.2	T03F6.8
	ZK484.7	T03F7.1
	ZK507.4	T03G11.1
	ZK54.3	T03G11.3
	ZK546.3	T03G6.2
	ZK550.5	T04A8.4
	ZK563.1	T04C12.3
	ZK563.2	T04C9.6
	ZK593.9	T04D3.4
	ZK616.10	T04F8.9
	ZK616.9	T05A10.2
	ZK622.2	T05A6.1
	ZK637.1	T05A7.5
	ZK637.3	T05A8.4
	ZK643.8	T05B11.6
	ZK673.6	T05B4.11
	ZK673.9	T05B4.2
	ZK688.1	T05C1.1
	ZK697.10	T05C1.2
	ZK697.11	T05C12.5
	ZK757.3	T05E11.8
	ZK770.1	T05E12.2
	ZK795.2	T05F1.8
	ZK813.6	T05G11.2
	ZK816.4	T05H10.8
	ZK829.1	T05H4.15
	ZK829.10	T06A1.2
	ZK829.2	T06C10.4
	ZK829.8	T06C12.10
	ZK84.2	T06C12.14
	ZK849.1	T06E4.4
	ZK849.4	T06F4.1
	ZK856.14	T06F4.3
	ZK856.4	T06G6.12
	ZK858.2	T06G6.2
	ZK863.9	T06G6.7
	ZK892.4	T06H11.5
	ZK896.1	T07A9.12
	ZK896.8	T07A9.3
	ZK899.6	T07C12.10
	ZK930.7	T07C12.11
	ZK938.1	T07C5.4
	ZK938.3	T07D1.3
	ZK945.6	T07D10.1
	ZK945.7	T07D10.6
	ZK945.8	T07D3.4
	ZK945.9	T07D4.2
	ZK993.1	T07E3.6
		T07F12.4
		T07G12.1
		T07G12.4
		T07H8.1
		T07H8.4
		T08A9.13
		T08A9.3
		T08A9.6
		T08B1.2
		T08E11.1
		T08E11.4
		T08G5.12
		T08G5.7
		T08G5.8
		T08H4.2
		T08H4.3
		T09A5.1
		T09B4.3
		T09B4.4
		T09B9.5
		T09D3.8
		T09E11.3
		T09F3.1
		T10A3.1
		T10B10.6
		T10D4.12
		T10D4.13
		T10E10.1
		T10E10.7
		T10G3.3
		T10H10.3
		T10H4.5
		T10H9.1
		T10H9.2
		T11B7.2
		T11F1.3
		T11F9.1
		T11F9.19
		T11F9.2
		T11G6.3
		T12A2.16
		T12A7.7
		T12C9.3
		T12C9.5
		T12C9.6
		T12D8.9
		T13A10.5
		T13C2.7
		T13C5.1
		T13F3.4
		T13F3.5
		T13G4.3
		T13H10.2
		T13H2.4
		T13H5.1
		T13H5.6
		T14A8.1
		T14B1.1
		T14B4.8
		T14D7.3
		T14E8.3
		T14F9.4
		T14F9.5
		T14G8.4
		T16A9.4
		T16H5.1
		T17A3.12
		T17A3.9
		T17H7.4
		T18H9.5
		T19C3.3
		T19C4.1
		T19C4.3
		T19C4.7
		T19C4.9
		T19C9.3
		T19C9.5
		T19D2.2
		T19D2.3
		T19D7.5
		T19H12.12
		T19H12.3
		T20B12.5
		T20B3.12
		T20B3.14
		T20D4.15
		T20G5.13
		T20G5.7
		T20H12.1
		T20H4.1
		T20H9.1
		T21B4.6
		T21B6.1
		T21B6.4
		T21C12.1
		T21D12.14
		T21E12.3
		T21G5.4
		T21G5.5
		T21H8.5
		T22B2.4
		T22B7.1
		T22C1.7
		T22C8.3
		T22C8.6
		T22C8.8
		T22E5.1
		T22E5.2
		T22F3.12
		T22F3.7
		T22F7.4
		T22H6.5
		T23B12.8
		T23B7.1
		T23B7.3
		T23D5.12
		T23D8.2
		T23D8.8
		T23E1.3
		T23E7.2
		T23F2.2
		T23F2.4
		T23F4.2
		T23F4.5
		T23F6.3
		T23G11.6
		T23H2.2
		T24A11.2
		T24C12.2
		T24C2.4
		T24D3.1
		T24D5.2
		T24F1.4
		T24F1.5
		T24F1.6
		T24F1.7
		T25B6.4
		T25B9.1
		T25B9.10
		T25B9.3
		T25C12.1
		T25C12.2
		T25D1.2
		T25D10.2
		T25F10.2
		T25F10.3
		T25G12.1
		T26C5.5
		T26H10.1
		T26H2.10
		T26H5.10
		T26H5.4
		T27A3.8
		T27A8.3
		T27A8.4
		T27B7.3
		T27B7.6
		T27C10.7
		T27C5.1
		T27C5.10
		T27E4.2
		T27E4.3
		T27E4.4
		T27E4.7
		T27E4.8
		T27E4.9
		T28A11.12
		T28B8.2
		T28B8.5
		T28C12.5
		T28C6.4
		T28C6.6
		T28D6.3
		T28D6.4
		T28D6.7
		T28F2.4
		T28F3.6
		T28F4.3
		T28H11.6
		VC27A7L.1
		VC5.5
		VK10D6R.1
		VZK822L.2
		W01A11.7
		W01A8.3
		W01B11.5
		W01B6.3
		W01C8.4
		W01C8.5
		W01C9.3
		W01D2.2
		W01H2.2
		W02A2.9
		W02B8.5
		W02B9.1
		W02C12.2
		W02D3.3
		W02D7.12
		W02H5.5
		W03B1.1
		W03B1.7
		W03C9.6
		W03C9.8
		W03D2.1
		W03D2.10
		W03D2.5
		W03D8.1
		W03D8.11
		W03F11.5
		W03F8.1
		W03F9.11
		W03G11.4
		W04A8.4
		W04E12.1
		W04G3.11
		W04G3.4
		W04H10.3
		W05B10.5
		W05B2.6
		W05E10.5
		W05E7.3
		W05H12.1
		W06B11.4
		W06F12.2
		W07B8.3
		W07E11.2
		W07E11.3
		W07G9.2
		W08A12.4
		W08D2.1
		W08D2.3
		W08E12.4
		W08E12.5
		W08E12.8
		W09B7.3
		W09C5.5
		W09C5.6
		W09D10.5
		W09G10.3
		W09G10.5
		W09G12.7
		W10C8.3
		W10C8.6
		W10D5.1
		W10G11.17
		W10G6.1
		Y102A11A.5
		Y102A5C.21
		Y102A5C.22
		Y105C5A.12
		Y105C5A.13
		Y105C5A.23
		Y105C5A.3
		Y105C5B.14
		Y105C5B.3
		Y105E8A.1
		Y106G6G.2
		Y106G6G.3
		Y106G6G.6
		Y110A2AL.9
		Y110A7A.13
		Y113G7A.15
		Y113G7A.4
		Y113G7A.6
		Y113G7B.1
		Y116A8B.5
		Y116A8C.44
		Y116F11A.6
		Y116F11B.14
		Y119C1B.6
		Y119D3B.17
		Y119D3B.18
		Y119D3B.19
		Y119D3B.20
		Y119D3B.3
		Y119D3B.4
		Y119D3B.8
		Y12A6A.2
		Y17D7B.5
		Y17D7C.6
		Y17G7B.1
		Y18D10A.6
		Y18H1A.10
		Y18H1A.15
		Y18H1A.8
		Y19D10A.15
		Y19D10A.8
		Y19D10B.2
		Y19D10B.4
		Y19D2B.2
		Y1B5A.1
		Y1H11.1
		Y20C6A.3
		Y22D7AL.1
		Y22D7AL.13
		Y22D7AL.16
		Y22D7AL.2
		Y22D7AR.13
		Y22D7AR.14
		Y22F5A.1
		Y22F5A.3
		Y23B4A.1
		Y23B4A.2
		Y24D9A.5
		Y24D9A.6
		Y24D9A.7
		Y25C1A.3
		Y26D4A.6
		Y34B4A.4
		Y34D9A.2
		Y34D9A.8
		Y37A1A.2
		Y37A1A.3
		Y37D8A.16
		Y37D8A.26
		Y37D8A.3
		Y37E11AL.4
		Y37E11AL.5
		Y37E11AL.6
		Y37E11B.7
		Y37E3.13
		Y37E3.19
		Y37H2A.10
		Y37H2A.9
		Y38C1AA.8
		Y38C1AB.1
		Y38C1AB.5
		Y38C9B.2
		Y38E10A.12
		Y38E10A.13
		Y38E10A.20
		Y38E10A.21
		Y38E10A.25
		Y38E10A.26
		Y38E10A.28
		Y38E10A.9
		Y38F1A.4
		Y38F2AL.1
		Y38H6C.15
		Y38H6C.17
		Y38H6C.18
		Y38H6C.22
		Y38H6C.4
		Y39A1A.18
		Y39A3A.3
		Y39A3B.2
		Y39A3B.5
		Y39A3CR.5
		Y39B6A.32
		Y39B6A.6
		Y39E4A.1
		Y39E4B.13
		Y39E4B.8
		Y39G10AR.17
		Y39H10A.1
		Y40A1A.1
		Y40B10A.7
		Y40H4A.1
		Y40H7A.5
		Y41C4A.11
		Y41C4A.13
		Y41C4A.18
		Y41C4A.6
		Y41C4A.8
		Y41D4A.7
		Y41D4B.6
		Y41E3.3
		Y41E3.6
		Y41G9A.4
		Y42A5A.3
		Y42G9A.2
		Y42H9AR.1
		Y42H9AR.5
		Y43C5A.1
		Y43C5A.3
		Y43D4A.1
		Y43F4A.1
		Y43F8A.5
		Y43F8B.13
		Y43F8B.5
		Y43F8B.6
		Y43F8B.7
		Y43F8C.16
[truncated: 363 more rows]
