# Supplementary material for: A Comprehensive Analysis of Gene Expression Changes Provoked by Bacterial and Fungal Infection in C. elegans
Source: PLoS One. 2011 May 13;6(5):e19055. doi: 10.1371/journal.pone.0019055 (PMC3094335; doi:10.1371/journal.pone.0019055)
Supplement: Table S18 — Genes regulated by D. coniospora infection. Genes (WS210) up-regulated after D. coniospora infection (12 h): genes shared between data sets. (XLS) [file pone.0019055.s022.xls]

## Sheet: TableS18
Genes up-regulated upon D. coniospora infection (12h): genes shared between datasets.
Technique	cDNA-arrays only	RNA-seq only	Oligo-arrays only	cDNA-arrays + RNA-seq	RNA-seq + Oligo-arrays	cDNA-arrays+ Oligo-arrays	all techniques
	B0001.3	6R55.2	AC8.4	B0213.4	B0213.17	B0336.13	B0213.5
	B0035.12	AH9.4	B0024.9	C48E7.10	B0213.3	C08B6.10	B0213.6
	B0035.3	B0034.7	B0035.1	K07A12.6	C09H10.5	C13G3.3	R09B5.9
	B0035.6	B0035.18	B0205.3	R09B5.3	C14B9.10	C30C11.4	Y46E12A.1
	B0238.10	B0035.8	B0250.8	R09B5.8	C15C8.6	F01G12.2
	B0261.1	B0041.1	B0280.5	T19B10.2	C17F3.1	F14H3.6
	B0336.3	B0205.2	B0495.5	T19C4.7	C17G10.6	F33E11.6
	B0361.2	B0205.4	B0495.7	W01F3.2	C17H1.5	F43G9.9
	B0361.7	B0207.10	C01G10.8	Y105E8B.6	C32B5.6	F46F11.2
	B0511.7	B0207.3	C02F5.3	Y18D10A.16	C50F4.6	H02I12.1
	B0554.1	B0212.6	C03A7.14	Y48E1B.9	F08H9.3	M01E11.5
	C01G10.7	B0213.11	C03B1.10	Y71G12B.14	F09F7.8	Y41D4A.5
	C01G8.1	B0213.15	C03B1.6		F10D7.3	Y45F10D.7
	C02A12.4	B0213.16	C04E6.12		F22B7.4	ZC376.7
	C02B10.2	B0213.2	C05C10.2		F26D11.12
	C04A2.7	B0228.5	C05C10.5		F26D11.13
	C05D11.2	B0238.15	C05D11.13		F26G1.2
	C05D2.5	B0238.6	C06E1.5		F53A9.1
	C06A5.6	B0250.2	C06E8.3		F53A9.8
	C06A8.3	B0284.1	C06E8.5		F53H2.2
	C06H2.3	B0284.2	C06G4.2		F55H12.4
	C07E3.1	B0284.3	C07F11.2		K06A4.6
	C07G1.3	B0285.3	C08F11.8		K12G11.3
	C08C3.4	B0286.2	C09G4.3		R08A2.3
	C09F9.7	B0303.8	C09H6.1		T04F8.8
	C10C5.6	B0310.3	C10C5.5		W02D7.8
	C12D8.11	B0334.1	C10G11.6		Y43F8C.9
	C13G5.2	B0348.2	C10H11.6		Y49C4A.9
	C14B1.2	B0379.6	C11D2.6		ZK970.7
	C14C6.5	B0391.9	C14F5.3
	C16A3.7	B0412.4	C15B12.8
	C16H3.2	B0414.1	C15C8.2
	C17C3.1	B0416.2	C16B8.1
	C17E7.4	B0454.4	C16C2.4
	C17F4.5	B0495.6	C16H3.3
	C17G10.9	B0496.6	C17E4.4
	C17H12.14	B0507.6	C24A11.1
	C24F3.4	B0507.8	C25A1.6
	C25A1.9	B0513.3	C26E6.1
	C25A11.2	B0513.9	C27F2.10
	C27B7.5	B0563.9	C29F9.4
	C27C7.1	B0564.3	C30F8.4
	C27D6.4	C01B10.7	C31A11.3
	C27F2.9	C01F1.5	C32D5.4
	C28H8.9	C01G10.18	C33D3.3
	C30B5.1	C01G12.11	C33E10.1
	C32E8.10	C01G12.5	C34B2.8
	C32E8.8	C01G12.6	C34C6.3
	C33C12.9	C01G12.9	C34D1.4
	C33H5.14	C01G5.7	C38C10.5
	C34B2.10	C02B4.4	C43H6.1
	C34F11.8	C02B8.1	C43H6.4
	C35D10.6	C02E7.13	C44C11.1
	C36B1.7	C02E7.7	C45B11.1
	C37C3.1	C02F4.4	C45G9.5
	C37C3.9	C02F5.11	C46G7.4
	C38D4.6	C03G5.8	C47B2.3
	C45E5.6	C03G6.12	C48B4.10
	C45G9.6	C03G6.8	C49C3.10
	C48B4.7	C04E6.13	C50H2.3
	C50E3.11	C04E6.8	C52E4.4
	C54G6.1	C04F12.6	C55A1.3
	C55A6.2	C04F5.6	C55F2.2
	D1007.8	C04G2.4	C56G7.1
	D2013.9	C04G6.5	CC8.2
	D2023.5	C04H4.1	CD4.3
	D2024.5	C05B5.1	CD4.6
	E01A2.1	C05B5.5	D1007.12
	E01B7.1	C05B5.8	D1007.14
	F01G4.4	C05B5.9	D1014.2
	F02E8.5	C05E4.14	D1054.9
	F08F3.6	C05E7.3	D2092.2
	F08G2.7	C05E7.4	D2092.6
	F09B12.3	C06A12.4	DY3.1
	F09E10.3	C06B3.13	E01B7.2
	F09F7.4	C06B8.8	E04F6.3
	F11G11.2	C06C6.3	EEED8.11
	F13D12.6	C06C6.5	F01D5.8
	F14D2.12	C06C6.6	F09E8.2
	F18A1.7	C06C6.8	F09G8.6
	F21G4.2	C06E2.9	F10A3.5
	F23B2.7	C06E4.3	F10D7.2
	F25B4.4	C06E4.6	F10E7.2
	F25D7.1	C06E4.8	F11G11.3
	F26D10.3	C06E7.6	F13A2.1
	F26H11.4	C06G3.11	F13D12.2
	F32A6.3	C06G3.3	F14B8.4
	F32B6.2	C06H5.2	F14D2.11
	F32D8.5	C07D10.3	F14D2.2
	F36A2.9	C07D8.2	F14D7.2
	F37B4.7	C07D8.5	F15A2.2
	F37C12.13	C07E3.5	F15C11.2
	F39B2.11	C07G3.10	F15D4.4
	F41H10.3	C08A9.9	F15E11.1
	F42A8.3	C08D8.1	F15E11.10
	F44F4.2	C08E3.10	F16B12.6
	F45E4.2	C08E3.13	F18C5.1
	F46F2.3	C08E3.5	F19F10.12
	F52B5.2	C08E3.6	F20B6.9
	F52D10.2	C08E3.9	F20E11.1
	F53A2.4	C08F8.9	F20H11.6
	F53F8.3	C08G5.7	F21E9.6
	F54C9.8	C08H9.11	F21H7.1
	F54D5.9	C08H9.7	F23H11.8
	F55A11.7	C09B8.8	F25B5.1
	F55C5.5	C09B9.6	F26B1.3
	F56C9.3	C09G12.17	F26D10.10
	F57A10.4	C09G9.8	F26E4.8
	F57B9.10	C09H10.2	F26F12.2
	F57F4.3	C09H5.2	F26F2.6
	F58A4.2	C09H5.5	F28D1.10
	F59B2.2	C10G8.2	F28F8.6
	F59H5.1	C10G8.3	F29G9.2
	H03A11.1	C10G8.7	F32D1.8
	H26D21.2	C11D2.2	F32E10.2
	K01C8.3	C12D5.11	F33D11.9
	K01C8.5	C12D8.16	F33D4.2
	K02B2.3	C13D9.1	F35B12.4
	K02D10.1	C13F10.2	F35E8.11
	K03H1.7	C14A11.2	F35F11.1
	K04F10.3	C15A11.7	F35G12.10
	K04G2.6	C15A7.2	F35H8.5
	K07A1.6	C15B12.3	F36G9.1
	K07H8.2	C15H9.1	F39H11.3
	K08H10.9	C15H9.2	F40D4.3
	K10H10.2	C16B8.2	F40E10.3
	M03A1.6	C16C4.12	F40E3.5
	M03C11.5	C16C4.13	F42A6.9
	M142.5	C16C8.8	F42A9.5
	R02F2.4	C16D9.9	F42E11.2
	R04D3.3	C16H3.1	F42F12.4
	R05G6.4	C17A2.1	F42G9.9
	R05H5.4	C17A2.8	F43C11.5
	R06C7.4	C17B7.10	F43E2.1
	R06F6.4	C17B7.8	F43G6.8
	R09F10.8	C17C3.4	F43G9.4
	R107.4	C17C3.9	F44A6.4
	R10E11.4	C17E7.1	F44C4.4
	R186.3	C17E7.12	F45F2.4
	T01C3.9	C17H1.4	F45H7.2
	T02G6.5	C17H1.6	F46C8.6
	T04A8.10	C17H1.9	F46F2.1
	T04A8.8	C17H12.11	F46H5.8
	T05F1.2	C18A11.1	F47B3.3
	T09B4.1	C18A3.7	F48C1.4
	T10F2.3	C18B2.2	F48C1.5
	T12C9.7	C18C4.7	F52E1.1
	T12G3.6	C18D11.6	F53F10.2
	T13F2.6	C18G1.1	F54F2.5
	T20H4.3	C18H7.1	F55C12.1
	T21C9.13	C23G10.11	F56C9.6
	T21G5.3	C23H3.7	F56D1.7
	T22D1.5	C23H5.11	F56D5.6
	T22F3.2	C23H5.7	F56E10.2
	T23B3.1	C24B5.5	F58A3.1
	T23G11.2	C24B9.9	F58E2.9
	T23G7.2	C24D10.7	F58F12.3
	T24H7.3	C24G7.1	F59A2.1
	T25G3.2	C24G7.2	F59A3.1
	T27A3.1	C24H11.4	F59A3.10
	T28D6.3	C24H11.5	F59H6.9
	W01A8.5	C24H12.11	H01G02.4
	W02F12.3	C24H12.8	H02I12.3
	W02F12.4	C24H12.9	H04M03.1
	W03C9.2	C25A1.2	H05C05.2
	W03F8.1	C25B8.7	H20J04.5
	W03F9.2	C25B8.8	JC8.13
	W05F2.3	C25D7.15	K01A6.6
	W09B6.3	C25E10.11	K02B12.7
	W09D10.3	C25E10.13	K03A11.2
	W10G6.3	C25E10.4	K04F10.4
	Y105E8A.8	C25E10.9	K04G2.8
	Y110A7A.18	C25F9.12	K05C4.7
	Y110A7A.6	C25F9.8	K06A5.4
	Y111B2A.20	C25G4.1	K06C4.6
	Y116A8C.9	C25G6.1	K07A1.10
	Y14H12B.2	C25G6.4	K07C11.1
	Y17G7B.4	C25H3.15	K07D4.3
	Y18D10A.11	C25H3.16	K07D4.6
	Y22D7AL.10	C26F1.1	K07E3.3
	Y22F5A.4	C26F1.2	K08H10.4
	Y32F6A.5	C26F1.9	K09G1.3
	Y34D9A.1	C27A2.8	K10C3.4
	Y37D8A.4	C27A7.8	K10D2.2
	Y38F1A.6	C27B7.9	K11C4.5
	Y38F2AR.9	C27C7.5	M01D1.10
	Y39A3CR.4	C27F2.6	M01E5.5
	Y39G10AL.3	C28C12.13	M02B1.3
	Y40B10A.1	C28C12.4	M03E7.4
	Y40B10A.8	C28F5.1	M110.5
	Y42G9A.4	C28G1.2	M28.5
	Y43F4B.4	C28H8.5	M88.3
	Y43F8C.13	C28H8.8	R01E6.5
	Y43F8C.8	C29A12.6	R02F11.1
	Y44A6D.2	C29E4.14	R05H5.3
	Y47G6A.2	C29E4.9	R07B1.6
	Y47G6A.22	C29F3.2	R07C3.4
	Y47G6A.24	C29F3.3	R08D7.3
	Y47H9C.7	C29F3.5	R08E5.4
	Y48G8AL.6	C29F5.4	R09D1.10
	Y48G8AL.9	C29G2.1	R10E12.1
	Y49E10.4	C29G2.2	R10E12.2
	Y53C12B.3	C29G2.4	R10E4.4
	Y53F4B.9	C29G2.6	R10H1.1
	Y53G8B.2	C30A5.5	R11A8.2
	Y54E5A.6	C30E1.3	R11A8.7
	Y54F10AM.11	C30F12.3	R11G1.4
	Y54G11A.3	C30F2.1	R148.3
	Y55D9A.2	C30G4.2	R151.2
	Y56A3A.18	C30G7.4	R151.7
	Y57A10A.29	C31B8.4	R31.3
	Y57E12AL.6	C31E10.3	R52.10
	Y57G11C.4	C31G12.4	T01B11.4
	Y62E10A.13	C31H5.4	T01C3.3
	Y65B4BL.5	C32A9.1	T01G9.6
	Y71F9AL.14	C32B5.7	T03F1.5
	Y71F9B.2	C32B5.9	T04C12.2
	Y71H2AM.10	C32E8.4	T04D1.3
	Y73B6BL.23	C32E8.6	T04D3.1
	Y73F8A.34	C32H11.1	T04H1.4
	Y74C9A.4	C32H11.3	T05A10.1
	Y76B12C.3	C33A12.4	T06C12.7
	Y94H6A.8	C33E10.10	T07H3.6
	Y97E10AR.4	C33E10.8	T08B2.12
	ZC410.7	C33F10.9	T08G5.10
	ZC416.6	C33G8.3	T10B11.7
	ZC434.8	C33H5.13	T10F2.4
	ZC513.6	C34B2.1	T10H9.6
	ZC53.7	C34C6.7	T12A2.11
	ZC8.3	C34D4.1	T12B5.1
	ZK1127.10	C34D4.11	T13G4.4
	ZK1236.7	C34D4.15	T13H5.7
	ZK265.5	C34F11.2	T15B7.2
	ZK596.1	C34F11.4	T17H7.4
	ZK652.3	C34F11.6	T19B4.2
		C34G6.2	T19D2.3
		C35A5.6	T19E10.1
		C35C5.9	T19F4.1
		C35D10.17	T22B11.2
		C35D10.3	T22B7.1
		C35E7.11	T22C1.2
		C36A4.10	T22H2.6
		C36B1.6	T24D11.1
		C36B7.3	T26C5.1
		C36C5.12	T26G10.4
		C36C5.6	T27E4.4
		C37A5.2	T27E9.1
		C37A5.8	T28F12.2
		C37H5.10	T28F3.1
		C37H5.9	W01B6.1
		C38C3.8	W02B12.3
		C38C5.1	W02D3.2
		C38C6.4	W03F9.1
		C38C6.6	W03G9.4
		C38H2.3	W04A8.6
		C39B10.6	W04B5.2
		C39B5.3	W05E10.1
		C39B5.9	W05E7.1
		C39E6.6	W07B3.2
		C40C9.3	W08E12.7
		C40H1.2	W09D10.4
		C41D7.2	W09D6.1
		C42D4.3	W09D6.6
		C42D8.9	W10D5.3
		C43D7.4	W10G11.4
		C44B12.3	Y102A11A.1
		C44B12.9	Y105C5B.18
		C44B9.6	Y105E8A.22
		C44H4.8	Y106G6E.6
		C44H9.7	Y111B2A.14
		C45B2.2	Y111B2A.18
		C45B2.3	Y113G7B.23
		C45B2.8	Y12A6A.2
		C45G3.4	Y17G7B.19
		C45G7.2	Y17G7B.9
		C45G7.3	Y17G9A.1
		C45G9.13	Y18D10A.17
		C45G9.15	Y18D10A.19
		C45G9.4	Y19D10B.4
		C45H4.10	Y23H5A.5
		C45H4.11	Y23H5A.8
		C46A5.2	Y23H5B.12
		C46F9.2	Y24D9A.6
		C47A4.5	Y32B12B.2
		C47E12.9	Y32F6B.3
		C47E8.11	Y37E11AM.2
		C47E8.2	Y37E11B.1
		C47E8.6	Y38C1AA.1
		C47F8.6	Y38C1AA.2
		C48B4.3	Y38C1BA.2
		C48D5.3	Y38E10A.4
		C49A9.7	Y39A1C.2
		C49C8.2	Y39E4B.3
		C49G7.11	Y39E4B.9
		C50B8.4	Y39G10AR.17
		C50D2.1	Y40C5A.3
		C50D2.4	Y40H7A.11
		C50F2.9	Y41D4B.16
		C50F7.5	Y41D4B.17
		C50F7.9	Y41D4B.19
		C50H2.7	Y41D4B.9
		C51E3.10	Y43C5A.5
		C52A11.3	Y44A6D.3
		C52B9.10	Y45F10A.6
		C52B9.11	Y45F10D.2
		C52B9.3	Y47D7A.12
		C52E4.1	Y48G8AL.10
		C53C11.1	Y50D4C.5
		C53C7.3	Y51A2A.3
		C53D5.3	Y51A2B.9
		C54C6.5	Y51A2D.1
		C54C6.7	Y51H4A.8
		C54C8.9	Y51H7C.1
		C54D10.14	Y54E10A.4
		C54D10.2	Y54E10BR.1
		C54D10.8	Y54G2A.15
		C54D2.6	Y55F3AM.3
		C54E10.2	Y57G11B.5
		C54F6.11	Y57G11C.20
		C54F6.5	Y57G11C.27
		C54F6.6	Y67H2A.2
		C54F6.8	Y68A4A.1
		C54G6.3	Y71D11A.3
		C54G7.1	Y71G12B.17
		C54H2.4	Y71H10B.1
		C55A6.8	Y71H2AM.23
		D1005.6	Y73B6BL.14
		D1007.13	Y73B6BL.5
		D1007.19	Y73E7A.8
		D1022.5	Y73F8A.14
		D1054.7	Y79H2A.1
		D1065.4	Y87G2A.3
		D1079.1	Y94H6A.1
		D1086.2	Y95B8A.5
		D2005.3	Y97E10C.1
		D2024.10	Y9D1A.2
		D2024.4	ZC21.3
		D2030.11	ZC404.8
		D2030.12	ZC410.2
		D2062.4	ZC412.9
		D2085.2	ZC64.2
		D2096.9	ZK1025.5
		DY3.3	ZK1236.3
		E02H9.4	ZK1236.5
		E03A3.4	ZK1248.16
		E03H4.10	ZK177.4
		E04F6.8	ZK328.8
		EGAP2.2	ZK550.4
		F01D4.8	ZK593.8
		F01D5.7	ZK6.7
		F01E11.3	ZK616.5
		F01G10.3	ZK652.6
		F02C12.2	ZK783.4
		F02D10.1	ZK892.1
		F02D10.4	ZK973.6
		F07A5.4
		F07B10.7
		F07B7.12
		F07C3.9
		F07C6.2
		F07D3.3
		F07E5.9
		F07G11.9
		F08B12.4
		F08B6.1
		F08C6.5
		F08D12.11
		F08F1.6
		F08F8.1
		F08G12.11
		F08G2.5
		F08G2.6
		F08H9.9
		F09B9.1
		F09C12.6
		F09C6.11
		F09C6.12
		F09C6.13
		F09C6.14
		F09C6.2
		F09C6.3
		F09E5.14
		F09E8.1
		F09E8.5
		F09F7.6
		F10B5.3
		F10C1.3
		F10C1.8
		F10D11.4
		F10D2.8
		F10D7.4
		F10E9.10
		F10E9.12
		F10F2.3
		F10G2.3
		F11A5.12
		F11C1.4
		F11C7.6
		F11C7.7
		F11D11.8
		F11E6.10
		F11E6.11
		F11E6.6
		F11G11.8
		F12A10.7
		F12A10.9
		F12B6.3
		F12E12.11
		F12E12.6
		F13A2.5
		F13A7.13
		F13B9.2
		F13D12.3
		F13E9.15
		F13G3.10
		F13H10.1
		F13H10.6
		F14D12.5
		F14D2.17
		F14D2.5
		F14D7.3
		F14E5.6
		F14F8.6
		F14F9.8
		F14H12.7
		F14H12.8
		F14H3.12
		F15A4.8
		F15B9.1
		F15B9.2
		F15D3.2
		F15D3.3
		F15D3.8
		F15E6.10
		F15E6.3
		F15E6.4
		F15E6.8
		F16B3.2
		F16B4.4
		F16B4.5
		F16B4.7
		F16C3.2
		F16H6.9
		F17E9.11
		F17E9.12
		F18A12.3
		F18E2.4
		F18E2.6
		F18E9.6
		F18G5.6
		F19B10.8
		F19D8.1
		F19D8.2
		F19H6.5
		F20D1.10
		F20D12.6
		F21A9.1
		F21C10.11
		F21D5.9
		F21D9.8
		F21E9.3
		F21F8.2
		F21H7.12
		F21H7.9
		F22B3.1
		F22B3.2
		F22B7.7
		F22B8.1
		F22D6.8
		F22E5.4
		F22E5.7
		F22F7.4
		F22G12.7
		F23A7.1
		F23B2.13
		F23B2.3
		F23D12.7
		F23F1.10
		F23F1.2
		F25A2.1
		F25B3.2
		F25B4.8
		F25H2.3
		F25H5.8
		F26A1.10
		F26A3.6
		F26C11.4
		F26D10.11
		F26D10.12
		F26D11.4
		F26D2.1
		F26D2.14
		F26D2.15
		F26D2.3
		F26E4.2
		F26E4.6
		F26F12.5
		F26F2.1
		F26G1.5
		F27D9.7
		F27E5.5
		F28A10.1
		F28B1.3
		F28B4.1
		F28C12.6
		F28D1.11
		F28D1.3
		F28D1.4
		F28D1.5
		F28F5.4
		F28F9.2
		F28G4.1
		F28H1.5
		F28H6.7
		F28H6.8
		F28H7.11
		F29B9.11
		F29D10.1
		F30A10.11
		F30A10.2
		F30H5.2
		F31A3.3
		F31E3.2
		F31E3.6
		F31F4.12
		F32A7.8
		F32D1.2
		F32G8.3
		F32G8.5
		F32H5.6
		F32H5.7
		F33A8.9
		F33D11.3
		F33D11.6
		F33D11.8
		F33E2.6
		F33G12.7
		F34D10.8
		F34D6.7
		F35B3.4
		F35C5.4
		F35C8.3
		F35D2.4
		F35E2.2
		F35E2.3
		F35G8.2
		F35H10.5
		F35H8.1
		F36A2.8
		F36A4.1
		F36A4.10
		F36A4.5
		F36A4.8
		F36F12.7
		F36F2.2
		F36G9.11
		F36G9.5
		F36H1.12
		F36H12.11
		F36H12.13
		F36H12.17
		F36H12.4
		F36H12.7
		F36H9.2
		F37A4.6
		F37A8.5
		F37B1.3
		F37B1.4
		F37B1.7
		F37C12.11
		F37C12.17
		F37C4.2
		F37C4.7
		F38A1.15
		F38A1.4
		F38A1.8
		F38A5.10
		F38A5.12
		F38B6.3
		F38E11.2
		F38H12.5
		F39D8.2
		F39D8.3
		F39E9.11
		F39H12.2
		F40B5.1
		F40F12.7
		F40F4.8
		F40F8.12
		F40F8.3
		F40G12.15
		F40G12.9
		F40G9.10
		F40G9.2
		F40H3.3
		F40H3.4
		F40H6.2
		F40H6.5
		F40H6.6
		F41B5.3
		F41C3.1
		F41C3.3
		F41C3.6
		F41C3.7
		F41D3.7
		F41D9.5
		F41E6.14
		F41E7.4
		F41E7.7
		F41E7.8
		F42A6.5
		F42A6.8
		F42A9.8
		F42A9.9
		F42D1.4
		F42E8.1
		F42F12.10
		F42G2.7
		F43C11.12
		F43C11.4
		F43C11.7
		F43C9.1
		F43D2.3
		F43E2.11
		F43E2.6
		F43G6.10
		F43G6.7
		F44A2.2
		F44B9.10
		F44C4.3
		F44E5.1
		F44E7.3
		F44F4.3
		F44F4.4
		F44F4.7
		F45C12.1
		F45D3.4
		F45E12.6
		F45E4.5
		F45F2.12
		F45F2.3
		F45F2.6
		F45G2.6
		F45H11.5
		F46A9.3
		F46B3.16
		F46B3.7
		F46B6.10
		F46B6.11
		F46B6.8
		F46C5.1
		F46C8.1
		F46F11.4
		F46F5.1
		F46F6.4
		F47B8.10
		F47B8.4
		F47B8.7
		F47C10.2
		F47C10.3
		F47C12.6
		F47E1.2
		F47F6.3
		F47G4.6
		F47G4.8
		F47H4.11
		F48B9.4
		F48C1.8
		F48C1.9
		F48C11.1
		F48D6.3
		F48E3.9
		F48F5.3
		F48F7.7
		F48G7.13
		F48G7.8
		F49A5.9
		F49B2.4
		F49E11.10
		F49E11.3
		F49F1.10
		F49F1.5
		F49H12.7
		F49H6.5
		F52C6.14
		F52D1.2
		F52D10.4
		F52D10.5
		F52D2.5
		F52E1.8
		F52E10.4
		F52F10.2
		F52H2.3
		F53A2.2
		F53A3.3
		F53A9.2
		F53A9.4
		F53A9.6
		F53A9.7
		F53B6.8
		F53B6.9
		F53B7.7
		F53C11.9
		F53C3.6
		F53C3.8
		F53F1.1
		F53F1.6
		F53F1.7
		F53F4.1
		F53F4.15
		F53F4.6
		F53G12.13
		F53H4.3
		F53H4.4
		F54B11.1
		F54B11.8
		F54B8.4
		F54C9.3
		F54D10.2
		F54D10.4
		F54D12.8
		F54F11.1
		F55A12.6
		F55A4.7
		F55B11.5
		F55C10.2
		F55C12.7
		F55C9.12
		F55F8.8
		F55G1.3
		F55G11.5
		F55G11.6
		F56A3.5
		F56C3.9
		F56C4.4
		F56C9.5
		F56D1.5
		F56D6.10
		F56D6.12
		F56D6.15
		F56D6.8
		F56G4.7
		F56H6.6
		F56H9.2
		F57A8.7
		F57C12.2
		F57C2.4
		F57E7.1
		F57H12.3
		F57H12.6
		F58B3.3
		F58B3.8
		F58E1.6
		F58E10.2
		F58E6.12
		F58E6.13
		F58G1.7
		F58G6.6
		F59A6.3
		F59A7.12
		F59A7.2
		F59A7.4
		F59B1.9
		F59B10.6
		F59E11.1
		F59E11.16
		F59E11.2
		F59E11.6
		F59E11.7
		F59E12.3
		F59F3.6
		H02I12.2
		H06I04.7
		H08J19.1
		H12D21.13
		H12I13.5
		H12I13.6
		H12I19.4
		H13N06.2
		H23L24.3
		H23N18.2
		H23N18.6
		H24O09.1
		H27D07.6
		H31B20.1
		H32K16.2
		H32K21.1
		H34I24.3
		H39E20.1
		K01A12.2
		K01A2.10
		K01A2.2
		K01A6.4
		K01B6.2
		K01C8.2
		K01D12.7
		K01G5.8
		K01H12.1
		K02A11.4
		K02C4.2
		K02E11.6
		K02E2.4
		K02E2.7
		K02E7.1
		K03A1.4
		K03B8.7
		K03E6.4
		K03H1.10
		K03H1.3
		K04C2.5
		K04E7.3
		K04F1.9
		K04G11.2
		K05C4.8
		K05F1.2
		K05F1.7
		K05F6.10
		K06A4.7
		K06B4.6
		K06B9.2
		K06C4.10
		K06C4.5
		K07C11.5
		K07D4.5
		K07E12.2
		K07F5.17
		K07F5.2
		K07F5.3
		K07F5.5
		K07H8.11
		K08B4.7
		K08C7.4
		K08C7.5
		K08C9.7
		K08D10.11
		K08D12.5
		K08D12.7
		K08E7.4
		K08F4.8
		K08F9.3
		K08G2.8
		K08H2.9
		K09C4.4
		K09C6.2
		K09C6.8
		K09C6.9
		K09C8.2
		K09C8.3
		K09C8.7
		K09E10.1
		K09E2.1
		K09E2.2
		K09E3.4
		K09E4.6
		K09E9.4
		K09F5.3
		K09H11.11
		K09H11.6
		K10B3.6
		K10C2.5
		K10C2.6
		K10C9.1
		K10D11.2
		K10D2.4
		K10G6.4
		K10G6.5
		K11D12.4
		K11E4.3
		K11G12.1
		K11G9.5
		K11G9.6
		K11H12.10
		K12B6.9
		K12C11.6
		K12H4.6
		M01B2.2
		M01D1.1
		M01D1.2
		M01D1.7
		M01G12.14
		M02B7.7
		M02D8.7
		M02E1.3
		M02G9.2
		M02G9.3
		M02H5.11
		M02H5.6
		M02H5.9
		M03D4.3
		M03E7.3
		M04C7.4
		M04D8.3
		M117.3
		M117.6
		M151.6
		M162.11
		M162.5
		M162.8
		M7.8
		R01H10.5
		R02C2.4
		R02E12.4
		R03G5.3
		R04A9.1
		R04B5.1
		R04B5.11
		R04B5.6
		R04D3.1
		R05C11.2
		R05F9.13
		R05F9.8
		R05G6.5
		R05G9.1
		R05G9R.1
		R05H10.1
		R06A10.1
		R07B1.8
		R07B7.15
		R07C12.4
		R07E3.3
		R07E4.3
		R07G3.2
		R07H5.10
		R08A2.7
		R08F11.7
		R09A8.4
		R09B3.2
		R09B5.13
		R09B5.2
		R09D1.11
		R09D1.7
		R09H3.3
		R102.1
		R106.1
		R10D12.17
		R10D12.7
		R10E11.7
		R10H1.2
		R11A5.6
		R11F4.3
		R11G1.7
		R11G10.2
		R11G11.14
		R11H6.4
		R12A1.3
		R12C12.10
		R12E2.14
		R12E2.15
		R12E2.8
		R134.1
		R13A1.10
		R13A5.3
		R13A5.6
		R13D11.6
		R148.1
		R160.4
		R173.4
		R186.2
		T01B10.5
		T01B6.1
		T01B7.8
		T01C3.10
		T01C3.11
		T01C3.4
		T01D1.8
		T01G6.1
		T01G6.3
		T02B5.4
		T02D1.7
		T02G5.1
		T02G5.14
		T02G6.7
		T02H6.10
		T02H6.3
		T03F7.3
		T03G11.10
		T04A6.4
		T04B2.6
		T04B2.8
		T04C12.8
		T04C9.2
		T04D3.8
		T04F8.7
		T04H1.1
		T04H1.3
		T05A10.2
		T05A7.10
		T05B4.1
		T05B4.4
		T05B9.2
		T05C1.1
		T05C1.2
		T05C1.3
		T05E11.7
		T05G5.11
		T05G5.12
		T06E4.10
		T06E4.9
		T06F4.3
		T06G6.3
		T06G6.8
		T07A5.5
		T07C4.5
		T07D1.3
		T07D1.5
		T07D10.1
		T07G12.5
		T07H3.2
		T07H3.3
		T08A9.10
		T08A9.11
		T08A9.12
		T08A9.13
		T08A9.2
		T08B6.1
		T08B6.6
		T08B6.7
		T08E11.1
		T08E11.8
		T08G3.12
		T08G5.14
		T08G5.15
		T08G5.16
		T09A12.2
		T09B4.6
		T09D3.4
		T10B10.9
		T10B9.10
		T10B9.3
		T10B9.5
		T10B9.8
		T10C6.11
		T10C6.12
		T10C6.14
		T10E10.6
		T10E9.8
		T11A5.7
		T12A7.3
		T12A7.7
		T12D8.10
		T12D8.5
		T13A10.12
		T13F2.12
		T14E8.4
		T14F9.5
		T15H9.3
		T15H9.5
		T17A3.10
		T17A3.12
		T18D3.2
		T19B10.11
		T19B10.3
		T19C3.9
		T19C4.1
		T19C4.2
		T19D7.6
		T19H12.11
		T19H12.4
		T19H12.6
		T19H5.2
		T20B3.13
		T20B3.15
		T20C4.1
		T20C7.2
		T20D3.1
		T20D4.11
		T20D4.15
		T20D4.16
		T20D4.7
		T21B4.9
		T21C9.8
		T21D12.5
		T21E12.5
		T21E3.2
		T22B11.3
		T22B7.3
		T22C1.12
		T22C8.5
		T22E5.3
		T22F3.11
		T22F3.12
		T22F3.5
		T22H2.1
		T22H2.3
		T22H2.4
		T23B12.8
		T23B3.3
		T23B7.1
		T23B7.3
		T23E7.6
		T23F2.3
		T23F2.4
		T24A6.8
		T24C12.1
		T24D5.1
		T24D5.4
		T24D8.4
		T24F1.7
		T25B6.3
		T25B9.11
		T25E12.9
		T26E3.7
		T26H2.5
		T26H2.6
		T26H5.10
		T26H5.3
		T26H5.4
		T26H5.5
		T26H5.9
		T27A1.7
		T27B7.2
		T27B7.7
		T27C10.2
		T27C10.7
		T27C5.5
		T27E4.7
		T28A11.2
		T28A11.7
		T28A8.2
		T28C12.1
		T28C6.1
		T28D9.12
		T28F2.1
		T28F4.5
		T28F4.6
		T28H10.4
		VK10D6R.1
		VW02B12L.2
		W01A8.7
		W01B11.1
		W01C8.1
		W01C9.2
		W01C9.5
		W02A2.9
		W02B3.7
		W02D3.6
		W02D3.7
		W02D7.11
		W03C9.5
		W03D2.10
		W03D2.2
		W03D2.9
		W03D8.3
		W03F8.6
		W03F9.4
		W03G9.5
		W03G9.7
		W03G9.8
		W04A8.2
		W04E12.1
		W04G3.11
		W04G5.9
		W04H10.1
		W05B10.4
		W05B2.2
		W05E10.5
		W05G11.5
		W05H5.7
		W05H7.4
		W06A11.1
		W06A7.5
		W06G6.10
		W06G6.11
		W07A8.5
		W07B8.4
		W07G1.6
		W08A12.2
		W08A12.4
		W08E12.3
		W08F4.10
		W08F4.11
		W08F4.7
		W09C5.9
		W09D12.1
		W09G12.7
		W09G3.1
		W09H1.3
		W10G11.1
		W10G11.2
		Y102A5B.2
		Y102A5C.36
		Y104H12D.4
		Y105C5A.13
		Y105C5B.16
		Y105C5B.8
		Y106G6G.3
		Y10G11A.2
		Y110A2AL.6
		Y110A7A.20
		Y111B2A.2
		Y113G7A.11
		Y116A8B.5
		Y116A8C.25
		Y116A8C.29
		Y116A8C.5
		Y116F11B.13
		Y116F11B.8
		Y119C1B.11
		Y119D3A.4
		Y17G9B.2
		Y18D10A.2
		Y18H1A.14
		Y19D2B.2
		Y1H11.1
		Y22D7AL.16
		Y22D7AR.5
		Y22F5A.6
		Y24D9A.5
		Y24D9A.7
		Y25C1A.10
		Y32B12A.3
		Y32B12A.4
		Y32G9A.10
		Y32G9A.11
		Y32H12A.1
		Y34D9A.8
		Y34F4.1
		Y34F4.3
		Y37A1B.4
		Y37F4.8
		Y38C1AA.9
		Y38E10A.11
		Y38E10A.15
		Y38E10A.18
		Y38E10A.20
		Y38E10A.25
		Y38F2AL.5
		Y38H6C.18
		Y38H6C.7
		Y38H8A.5
		Y39A1C.1
		Y39A3CL.3
		Y39A3CR.8
		Y39B6A.23
		Y39B6A.5
		Y39E4B.4
		Y39G10AR.16
		Y39G10AR.20
		Y40B10A.3
		Y40B10A.6
		Y40H7A.1
		Y40H7A.4
		Y41D4B.15
		Y41D4B.20
		Y41D4B.26
		Y41D4B.5
		Y41E3.12
		Y41G9A.10
		Y41G9A.5
		Y43C5A.3
		Y43D4A.6
		Y43F4A.3
		Y43F4A.4
		Y43F8A.1
		Y43F8B.13
		Y43F8C.1
		Y44A6B.1
		Y44E3A.3
		Y44E3B.2
		Y45F10B.15
		Y45F10B.3
		Y45F10C.6
		Y45F10D.6
		Y45G5AL.2
		Y46B2A.3
		Y46C8AR.1
		Y46E12BR.1
		Y46G5A.26
		Y46H3A.4
		Y46H3A.5
		Y46H3D.1
		Y47D3A.32
		Y47H10A.3
		Y48A6B.8
		Y48C3A.1
		Y48E1B.15
		Y48E1B.16
		Y48G1BL.7
		Y48G1C.9
		Y48G9A.10
		Y48G9A.7
		Y49A3A.4
		Y49E10.22
		Y49E10.25
		Y49F6B.12
		Y49F6B.5
		Y49F6C.7
		Y4C6B.2
		Y4C6B.4
		Y50D4A.5
		Y50E8A.1
		Y50E8A.17
		Y50E8A.3
		Y51A2B.5
		Y51A2D.11
		Y51A2D.12
		Y51B9A.7
		Y51H4A.5
		Y52B11B.1
		Y52E8A.1
		Y53C12A.2
		Y53F4A.2
		Y53F4B.17
		Y53F4B.37
		Y53F4B.6
		Y53G8AR.1
		Y53H1A.3
		Y53H1A.4
		Y54E2A.9
		Y54F10BM.7
		Y54G2A.20
		Y54G2A.37
		Y54G2A.47
		Y54G2A.8
		Y54G9A.10
		Y55B1AL.2
		Y55B1AR.3
		Y55B1BR.6
		Y55F3AM.2
		Y55F3BR.4
		Y55F3C.10
		Y57A10A.24
		Y57A10A.35
		Y57A10C.10
		Y57E12AR.1
		Y57G11C.46
		Y57G11C.499
		Y57G11C.52
		Y57G7A.4
		Y57G7A.8
		Y58A7A.2
		Y59H11AM.1
		Y59H11AM.4
		Y5F2A.2
		Y5H2B.7
		Y60A3A.15
		Y60A3A.2
		Y60A9A.1
		Y60C6A.1
		Y61B8A.4
		Y62E10A.19
		Y62E10A.3
		Y62H9A.10
		Y64G10A.10
		Y64H9A.1
		Y65B4BR.1
		Y65B4BR.9
		Y67A10A.11
		Y67D8C.6
		Y68A4A.13
		Y69A2AR.27
		Y69A2AR.8
		Y69F12A.3
		Y69H2.10
		Y6E2A.4
		Y71A12B.6
		Y71F9AL.6
		Y71F9AR.4
		Y71G12B.18
		Y71G12B.7
		Y73B3A.11
		Y73B3A.5
		Y73B3B.2
		Y73B6A.2
		Y73B6BL.10
		Y73B6BL.22
		Y73B6BL.36
		Y73F8A.12
		Y73F8A.31
		Y75B12B.3
		Y75B8A.33
		Y75B8A.34
		Y76B12C.8
		Y76B12C.9
		Y77E11A.14
		Y79H2A.4
		Y7A5A.10
		Y7A5A.6
		Y80D3A.7
		Y82E9BL.16
		Y82E9BR.11
		Y82E9BR.21
		Y82E9BR.23
		Y82E9BR.3
		Y82E9BR.6
		Y87G2A.12
		Y87G2A.15
		Y87G2A.20
		Y92C3B.1
		Y94H6A.12
		Y94H6A.2
		Y94H6A.6
		Y95B8A.2
		Y95D11A.2
		Y97E10B.7
		Y9C2UA.2
		Y9C9A.1
		Y9C9A.13
		Y9C9A.3
		ZC132.9
		ZC142.1
		ZC15.3
		ZC15.5
		ZC15.6
		ZC168.2
		ZC168.5
		ZC190.10
		ZC204.1
		ZC204.13
		ZC21.10
		ZC239.10
		ZC239.13
		ZC239.14
		ZC239.16
		ZC239.17
		ZC239.5
		ZC262.4
		ZC328.5
		ZC334.7
		ZC334.8
		ZC373.2
		ZC374.1
		ZC395.5
		ZC404.1
		ZC412.6
		ZC443.5
		ZC47.13
		ZC487.5
		ZC504.1
		ZC513.12
		ZK1010.6
		ZK1055.2
		ZK1098.11
		ZK112.5
		ZK1240.10
		ZK1240.6
		ZK1248.17
		ZK1251.2
		ZK1290.10
		ZK1307.2
		ZK1307.3
		ZK1320.4
		ZK177.10
		ZK177.9
		ZK250.2
		ZK250.8
		ZK262.4
		ZK337.1
		ZK353.5
		ZK354.11
		ZK381.3
		ZK402.1
		ZK470.1
		ZK488.1
		ZK507.4
		ZK546.3
		ZK546.6
		ZK550.1
		ZK550.2
		ZK593.9
		ZK6.8
		ZK616.2
		ZK617.2
		ZK637.15
		ZK666.2
		ZK666.6
		ZK673.1
		ZK686.5
		ZK688.4
		ZK697.14
		ZK75.1
		ZK75.2
		ZK757.3
		ZK783.5
		ZK783.6
		ZK836.3
		ZK84.5
		ZK84.7
		ZK849.6
		ZK856.6
		ZK863.5
		ZK892.6
		ZK899.4
		ZK938.3
		ZK945.8
		ZK970.6
		ZK993.2
		ZK994.6
